# Supplementary material for: GOLink: Finding Cooccurring Terms across Gene Ontology Namespaces
Source: Hindawi journal article supplement (doi:10.1155/2013/594528), 2013-01-01
Supplement: f1 [file 594528.f1.zip]

Supplementary Table 1: The 59 common terms found in all three GOLink terms lists (all\_list, query\_list and parchild\_list) using the query term ‘regulation of gene expression’ (GO:0010468) and applying the evidence code filter “!IEA” and database filter “UniProtKB”:

| Namespace          | GO_ID      | GO_Name                                                                                       |
|--------------------|------------|-----------------------------------------------------------------------------------------------|
| cellular_component | GO:0005634 | nucleus                                                                                       |
| biological_process | GO:0006355 | regulation of transcription, DNA-dependent                                                    |
| biological_process | GO:0045893 | positive regulation of transcription, DNA-dependent                                           |
| molecular_function | GO:0003700 | sequence-specific DNA binding transcription factor activity                                   |
| biological_process | GO:0045944 | positive regulation of transcription from RNA polymerase II promoter                          |
| biological_process | GO:0045892 | negative regulation of transcription, DNA-dependent                                           |
| cellular_component | GO:0005737 | cytoplasm                                                                                     |
| molecular_function | GO:0005515 | protein binding                                                                               |
| biological_process | GO:0000122 | negative regulation of transcription from RNA polymerase II promoter                          |
| molecular_function | GO:0003677 | DNA binding                                                                                   |
| cellular_component | GO:0005654 | nucleoplasm                                                                                   |
| cellular_component | GO:0005829 | cytosol                                                                                       |
| biological_process | GO:0006357 | regulation of transcription from RNA polymerase II promoter                                   |
| cellular_component | GO:0005730 | nucleolus                                                                                     |
| molecular_function | GO:0008134 | transcription factor binding                                                                  |
| molecular_function | GO:0043565 | sequence-specific DNA binding                                                                 |
| cellular_component | GO:0005667 | transcription factor complex                                                                  |
| molecular_function | GO:0003713 | transcription coactivator activity                                                            |
| molecular_function | GO:0044212 | transcription regulatory region DNA binding                                                   |
| cellular_component | GO:0005615 | extracellular space                                                                           |
| biological_process | GO:0010628 | positive regulation of gene expression                                                        |
| cellular_component | GO:0005886 | plasma membrane                                                                               |
| molecular_function | GO:0042803 | protein homodimerization activity                                                             |
| molecular_function | GO:0003705 | RNA polymerase II distal enhancer sequence-specific DNA binding transcription factor activity |
| molecular_function | GO:0003714 | transcription corepressor activity                                                            |
| cellular_component | GO:0048471 | perinuclear region of cytoplasm                                                               |
| molecular_function | GO:0042802 | identical protein binding                                                                     |

|                           |            |                                                                                                |
|---------------------------|------------|------------------------------------------------------------------------------------------------|
| <b>molecular_function</b> | GO:0008270 | zinc ion binding                                                                               |
| <b>molecular_function</b> | GO:0046982 | protein heterodimerization activity                                                            |
| <b>cellular_component</b> | GO:0043234 | protein complex                                                                                |
| <b>cellular_component</b> | GO:0005576 | extracellular region                                                                           |
| <b>biological_process</b> | GO:0051091 | positive regulation of sequence-specific DNA binding transcription factor activity             |
| <b>cellular_component</b> | GO:0005794 | Golgi apparatus                                                                                |
| <b>biological_process</b> | GO:0010629 | negative regulation of gene expression                                                         |
| <b>biological_process</b> | GO:0043433 | negative regulation of sequence-specific DNA binding transcription factor activity             |
| <b>cellular_component</b> | GO:0005887 | integral to plasma membrane                                                                    |
| <b>molecular_function</b> | GO:0042393 | histone binding                                                                                |
| <b>biological_process</b> | GO:0010468 | regulation of gene expression                                                                  |
| <b>molecular_function</b> | GO:0008201 | heparin binding                                                                                |
| <b>molecular_function</b> | GO:0008022 | protein C-terminus binding                                                                     |
| <b>molecular_function</b> | GO:0004879 | ligand-activated sequence-specific DNA binding RNA polymerase II transcription factor activity |
| <b>molecular_function</b> | GO:0001071 | nucleic acid binding transcription factor activity                                             |
| <b>cellular_component</b> | GO:0016021 | integral to membrane                                                                           |
| <b>molecular_function</b> | GO:0046983 | protein dimerization activity                                                                  |
| <b>molecular_function</b> | GO:0047485 | protein N-terminus binding                                                                     |
| <b>cellular_component</b> | GO:0000785 | chromatin                                                                                      |
| <b>molecular_function</b> | GO:0035035 | histone acetyltransferase binding                                                              |
| <b>biological_process</b> | GO:0061418 | regulation of transcription from RNA polymerase II promoter in response to hypoxia             |
| <b>biological_process</b> | GO:0000083 | regulation of transcription involved in G1/S phase of mitotic cell cycle                       |
| <b>cellular_component</b> | GO:0005635 | nuclear envelope                                                                               |
| <b>cellular_component</b> | GO:0005618 | cell wall                                                                                      |
| <b>molecular_function</b> | GO:0035198 | miRNA binding                                                                                  |
| <b>molecular_function</b> | GO:0035257 | nuclear hormone receptor binding                                                               |
| <b>cellular_component</b> | GO:0031519 | PcG protein complex                                                                            |
| <b>molecular_function</b> | GO:0020037 | heme binding                                                                                   |
| <b>cellular_component</b> | GO:0035102 | PRC1 complex                                                                                   |
| <b>cellular_component</b> | GO:0044428 | nuclear part                                                                                   |

|                           |            |                                                |
|---------------------------|------------|------------------------------------------------|
| <b>cellular_component</b> | GO:0015030 | Cajal body                                     |
| <b>biological_process</b> | GO:0060965 | negative regulation of gene silencing by miRNA |
