# Supplementary material for: GOLink: Finding Cooccurring Terms across Gene Ontology Namespaces
Source: Hindawi journal article supplement (doi:10.1155/2013/594528), 2013-01-01
Supplement: f1 [file 594528.f1.zip]

Supplementary Table 2: Genes from the negative list deemed by GOLink to be true positives

| List source    | Gene ID | Gene Name                                              |
|----------------|---------|--------------------------------------------------------|
| CellMot        | P12755  | Ski oncogene                                           |
| CellMot        | P14921  | Protein C-ets-1                                        |
| CellMot        | P28906  | Hematopoietic progenitor cell antigen CD34             |
| LipidMetabProc | P24468  | COUP transcription factor 2                            |
| LipidMetabProc | P36956  | Sterol regulatory element-binding protein 1            |
| LipidMetabProc | P37231  | Peroxisome proliferator-activated receptor gamma       |
| LipidMetabProc | P41238  | C->U-editing enzyme APOBEC-1                           |
| LipidMetabProc | Q03181  | Peroxisome proliferator-activated receptor delta       |
| LipidMetabProc | Q07869  | Peroxisome proliferator-activated receptor alpha       |
| LipidMetabProc | Q12772  | Sterol regulatory element-binding protein 2            |
| LipidMetabProc | Q61L47  | Mediator of RNA polymerase II transcription subunit 15 |
