# Supplementary material for: GOLink: Finding Cooccurring Terms across Gene Ontology Namespaces
Source: Int J Genomics. 2013 Dec 31;2013:594528. doi: 10.1155/2013/594528 (PMC3892482; doi:10.1155/2013/594528)
Supplement: Supplementary file 1 — (SupplementaryFile1.xls): GOLink terms lists generated using the query term ‘regulation of gene expression', the evidence code filter “!IEA” and database filter ‘UniProtKB'. Supplementary File 2 (SupplementaryFile2.xls): The top 50 Molecular Function terms from each GOLink terms list (a); the genes and annotation used for the positive list and the negative list (b); the raw statistical data for sensitivity, specificity, accuracy, PPV, NPV and the number and proportion of positive and negative genes found (c). These latter data correspond to Figure 3. Supplementary File 3 (SupplementaryFile3.xls): The genes and annotation used for the positive list and the negative list and raw statistical data for sensitivity, specificity, accuracy, PPV, NPV and the number and proportion of positive and negative genes found when the true positives from Supplementary Table 2 are removed (a). The raw statistical data when both the true positives and the term ‘protein binding' are removed from the GOLink terms lists (b). Supplementary File 4 (SupplementaryFile4.xls): The five GOLink all_list terms lists generated using the query term ‘regulation of gene expression' and the evidence code filter “!IEA” for each of the five annotation sources (“UniprotKB, “PomBase”, “MGI”, “SGD” and “ZFIN”) used in the creation of Figure 4. Supplementary File 5 (SupplementaryFile5.xls): a) Summary of the top 100 terms from a GOLink query_list terms list (b) and a QuickGO terms list (c) generated using the query term ‘regulation of gene expression' and the evidence code filter “!IEA”. Supplementary Figure 1 (SupplementaryFigure1.jpg): Venn diagram showing the overlap between the top 50 Molecular Function terms from each of the three GOLink terms lists as found in Supplementary File 2. Supplementary Table 1 (SupplementaryTable1.doc): The 59 GOLink consensus terms found in all three GOLink terms lists. Supplementary Table 2 (SupplementaryTable2.doc): Genes from the negative list deemed t [file 594528.f1.zip › Files/SupplementaryFile1.xls]

## Sheet: all_list
Namespace	GO_ID	GO_Name	Together	TermCount	SubjectCount	Score(PR)	Score(S%)
cellular_component	GO:0005634	nucleus	2176	6934	53	5.19	22.32
biological_process	GO:0006355	regulation of transcription, DNA-dependent	1046	1046	53	16.53	20.96
biological_process	GO:0045893	positive regulation of transcription, DNA-dependent	1033	1033	53	16.53	20.7
molecular_function	GO:0003700	sequence-specific DNA binding transcription factor activity	1035	1142	53	14.98	20.31
biological_process	GO:0045944	positive regulation of transcription from RNA polymerase II promoter	904	904	53	16.53	18.12
biological_process	GO:0045892	negative regulation of transcription, DNA-dependent	857	857	53	16.53	17.17
cellular_component	GO:0005737	cytoplasm	1267	6369	53	3.29	12.55
molecular_function	GO:0005515	protein binding	1331	7000	53	3.14	12.49
biological_process	GO:0000122	negative regulation of transcription from RNA polymerase II promoter	602	602	53	16.53	12.06
molecular_function	GO:0003677	DNA binding	540	893	53	10	10.11
cellular_component	GO:0005654	nucleoplasm	468	1255	53	6.16	8.1
biological_process	GO:0043066	negative regulation of apoptotic process	369	688	53	8.87	6.95
cellular_component	GO:0005829	cytosol	544	3778	53	2.38	6.61
biological_process	GO:0006357	regulation of transcription from RNA polymerase II promoter	326	326	53	16.53	6.53
cellular_component	GO:0005730	nucleolus	466	2746	53	2.81	6.41
molecular_function	GO:0008134	transcription factor binding	311	398	53	12.92	6.13
molecular_function	GO:0043565	sequence-specific DNA binding	307	368	53	13.79	6.08
cellular_component	GO:0005667	transcription factor complex	280	294	53	15.74	5.6
molecular_function	GO:0003713	transcription coactivator activity	269	333	53	13.35	5.32
molecular_function	GO:0044212	transcription regulatory region DNA binding	265	279	53	15.7	5.3
cellular_component	GO:0005615	extracellular space	286	1102	53	4.29	4.93
biological_process	GO:0010628	positive regulation of gene expression	231	231	53	16.53	4.63
biological_process	GO:0008284	positive regulation of cell proliferation	237	462	53	8.48	4.54
biological_process	GO:0008285	negative regulation of cell proliferation	222	459	53	7.99	4.25
biological_process	GO:0010467	gene expression	220	663	53	5.48	4.05
cellular_component	GO:0005886	plasma membrane	405	5448	53	1.23	4.04
molecular_function	GO:0003682	chromatin binding	203	333	53	10.08	3.96
biological_process	GO:0006366	transcription from RNA polymerase II promoter	199	380	53	8.66	3.85
molecular_function	GO:0042803	protein homodimerization activity	222	1180	53	3.11	3.73
biological_process	GO:0006468	protein phosphorylation	189	532	53	5.87	3.54
molecular_function	GO:0003705	RNA polymerase II distal enhancer sequence-specific DNA binding transcription factor activity	171	174	53	16.24	3.42
molecular_function	GO:0003690	double-stranded DNA binding	163	234	53	11.51	3.22
biological_process	GO:0007165	signal transduction	185	958	53	3.19	3.21
molecular_function	GO:0003714	transcription corepressor activity	158	199	53	13.12	3.14
biological_process	GO:0051092	positive regulation of NF-kappaB transcription factor activity	156	156	53	16.53	3.13
biological_process	GO:0051090	regulation of sequence-specific DNA binding transcription factor activity	145	145	53	16.53	2.91
biological_process	GO:0006367	transcription initiation from RNA polymerase II promoter	145	201	53	11.92	2.87
biological_process	GO:0043065	positive regulation of apoptotic process	146	266	53	9.07	2.86
biological_process	GO:0050821	protein stabilization	139	139	53	16.53	2.79
molecular_function	GO:0008301	DNA binding, bending	139	170	53	13.52	2.77
cellular_component	GO:0048471	perinuclear region of cytoplasm	147	592	53	4.1	2.7
biological_process	GO:0006351	transcription, DNA-dependent	134	170	53	13.03	2.67
biological_process	GO:0009790	embryo development	135	248	53	9	2.65
biological_process	GO:0006446	regulation of translational initiation	125	125	53	16.53	2.51
biological_process	GO:0030308	negative regulation of cell growth	128	260	53	8.14	2.5
molecular_function	GO:0042802	identical protein binding	134	504	53	4.39	2.5
molecular_function	GO:0008270	zinc ion binding	137	658	53	3.44	2.49
biological_process	GO:0007389	pattern specification process	123	127	53	16.01	2.46
biological_process	GO:0006917	induction of apoptosis	124	279	53	7.35	2.41
cellular_component	GO:0043234	protein complex	122	263	53	7.67	2.38
molecular_function	GO:0046982	protein heterodimerization activity	123	294	53	6.92	2.38
molecular_function	GO:0003723	RNA binding	123	415	53	4.9	2.33
cellular_component	GO:0009986	cell surface	127	587	53	3.58	2.33
cellular_component	GO:0005576	extracellular region	157	2335	53	1.11	2.19
biological_process	GO:0051091	positive regulation of sequence-specific DNA binding transcription factor activity	108	108	53	16.53	2.16
biological_process	GO:0035690	cellular response to drug	113	407	53	4.59	2.14
biological_process	GO:0007283	spermatogenesis	109	290	53	6.21	2.11
molecular_function	GO:0019901	protein kinase binding	106	276	53	6.35	2.05
biological_process	GO:0008283	cell proliferation	107	365	53	4.85	2.04
cellular_component	GO:0000790	nuclear chromatin	101	125	53	13.36	2.01
biological_process	GO:0045766	positive regulation of angiogenesis	102	195	53	8.65	2.01
biological_process	GO:0045087	innate immune response	107	458	53	3.86	2
biological_process	GO:0001934	positive regulation of protein phosphorylation	99	145	53	11.29	1.97
cellular_component	GO:0005794	Golgi apparatus	112	830	53	2.23	1.96
biological_process	GO:0010629	negative regulation of gene expression	97	97	53	16.53	1.94
biological_process	GO:0060070	canonical Wnt receptor signaling pathway	97	166	53	9.66	1.92
cellular_component	GO:0005783	endoplasmic reticulum	110	899	53	2.02	1.9
biological_process	GO:0032088	negative regulation of NF-kappaB transcription factor activity	94	94	53	16.53	1.88
biological_process	GO:0006338	chromatin remodeling	94	129	53	12.04	1.87
biological_process	GO:0030335	positive regulation of cell migration	95	188	53	8.35	1.87
biological_process	GO:0043123	positive regulation of I-kappaB kinase/NF-kappaB cascade	94	185	53	8.4	1.85
biological_process	GO:0006954	inflammatory response	95	267	53	5.88	1.84
biological_process	GO:0001822	kidney development	92	129	53	11.79	1.83
biological_process	GO:0030509	BMP signaling pathway	89	89	53	16.53	1.78
molecular_function	GO:0004674	protein serine/threonine kinase activity	93	348	53	4.42	1.77
biological_process	GO:0007179	transforming growth factor beta receptor signaling pathway	87	135	53	10.65	1.73
molecular_function	GO:0004672	protein kinase activity	90	291	53	5.11	1.73
biological_process	GO:0006915	apoptotic process	92	443	53	3.43	1.72
biological_process	GO:0006974	response to DNA damage stimulus	89	289	53	5.09	1.71
biological_process	GO:0001666	response to hypoxia	85	208	53	6.75	1.66
molecular_function	GO:0019899	enzyme binding	84	241	53	5.76	1.63
cellular_component	GO:0005622	intracellular	85	331	53	4.24	1.62
molecular_function	GO:0005509	calcium ion binding	85	384	53	3.66	1.61
biological_process	GO:0043433	negative regulation of sequence-specific DNA binding transcription factor activity	80	80	53	16.53	1.6
biological_process	GO:0043280	positive regulation of cysteine-type endopeptidase activity involved in apoptotic process	80	91	53	14.53	1.6
biological_process	GO:0007507	heart development	80	140	53	9.45	1.58
molecular_function	GO:0003743	translation initiation factor activity	80	172	53	7.69	1.57
biological_process	GO:0042981	regulation of apoptotic process	80	202	53	6.55	1.56
biological_process	GO:0007267	cell-cell signaling	79	258	53	5.06	1.53
cellular_component	GO:0005887	integral to plasma membrane	95	1324	53	1.19	1.53
cellular_component	GO:0005739	mitochondrion	99	1662	53	0.98	1.51
biological_process	GO:0007050	cell cycle arrest	76	148	53	8.49	1.5
molecular_function	GO:0004842	ubiquitin-protein ligase activity	81	508	53	2.64	1.5
biological_process	GO:0007596	blood coagulation	80	446	53	2.96	1.49
biological_process	GO:0017148	negative regulation of translation	74	74	53	16.53	1.48
molecular_function	GO:0031625	ubiquitin protein ligase binding	75	154	53	8.05	1.48
biological_process	GO:0009888	tissue development	73	75	53	16.09	1.46
biological_process	GO:0071456	cellular response to hypoxia	73	103	53	11.72	1.45
molecular_function	GO:0042393	histone binding	73	107	53	11.28	1.45
biological_process	GO:0007219	Notch signaling pathway	72	114	53	10.44	1.43
molecular_function	GO:0070888	E-box binding	71	78	53	15.05	1.42
biological_process	GO:0000165	MAPK cascade	72	136	53	8.75	1.42
biological_process	GO:0007275	multicellular organismal development	73	221	53	5.46	1.42
molecular_function	GO:0005102	receptor binding	74	293	53	4.17	1.42
biological_process	GO:0042593	glucose homeostasis	69	105	53	10.86	1.37
biological_process	GO:0070374	positive regulation of ERK1 and ERK2 cascade	69	152	53	7.5	1.36
molecular_function	GO:0001077	RNA polymerase II core promoter proximal region sequence-specific DNA binding transcription factor activity involved in positive regulation of transcription	67	68	53	16.29	1.34
biological_process	GO:0030521	androgen receptor signaling pathway	67	76	53	14.57	1.34
biological_process	GO:0001525	angiogenesis	67	170	53	6.51	1.32
biological_process	GO:0007420	brain development	66	193	53	5.65	1.29
biological_process	GO:0034587	piRNA metabolic process	64	69	53	15.33	1.28
biological_process	GO:0001649	osteoblast differentiation	64	74	53	14.3	1.28
biological_process	GO:0045786	negative regulation of cell cycle	64	91	53	11.63	1.28
cellular_component	GO:0005813	centrosome	70	561	53	2.06	1.28
molecular_function	GO:0003729	mRNA binding	64	107	53	9.89	1.27
biological_process	GO:0090090	negative regulation of canonical Wnt receptor signaling pathway	64	125	53	8.46	1.27
biological_process	GO:0043046	DNA methylation involved in gamete generation	63	63	53	16.53	1.26
biological_process	GO:0006461	protein complex assembly	64	149	53	7.1	1.26
biological_process	GO:0006281	DNA repair	66	325	53	3.36	1.26
biological_process	GO:0030336	negative regulation of cell migration	63	141	53	7.39	1.24
molecular_function	GO:0005524	ATP binding	67	525	53	2.11	1.23
biological_process	GO:0001837	epithelial to mesenchymal transition	61	68	53	14.83	1.22
biological_process	GO:0048661	positive regulation of smooth muscle cell proliferation	61	81	53	12.45	1.22
biological_process	GO:0048011	nerve growth factor receptor signaling pathway	63	220	53	4.73	1.22
molecular_function	GO:0019904	protein domain specific binding	61	111	53	9.08	1.21
molecular_function	GO:0030374	ligand-dependent nuclear receptor transcription coactivator activity	60	64	53	15.5	1.2
biological_process	GO:0043491	protein kinase B signaling cascade	60	81	53	12.24	1.2
biological_process	GO:0030447	filamentous growth	64	397	53	2.66	1.2
biological_process	GO:0043154	negative regulation of cysteine-type endopeptidase activity involved in apoptotic process	60	131	53	7.57	1.19
biological_process	GO:0007399	nervous system development	62	266	53	3.85	1.19
biological_process	GO:0019221	cytokine-mediated signaling pathway	62	295	53	3.47	1.19
biological_process	GO:0006919	activation of cysteine-type endopeptidase activity involved in apoptotic process	60	141	53	7.03	1.18
biological_process	GO:0050729	positive regulation of inflammatory response	59	95	53	10.27	1.17
cellular_component	GO:0005852	eukaryotic translation initiation factor 3 complex	59	120	53	8.13	1.17
biological_process	GO:0030513	positive regulation of BMP signaling pathway	58	58	53	16.53	1.16
biological_process	GO:0009952	anterior/posterior pattern specification	57	88	53	10.71	1.14
biological_process	GO:0016525	negative regulation of angiogenesis	57	102	53	9.24	1.13
biological_process	GO:0016567	protein ubiquitination	59	281	53	3.47	1.13
molecular_function	GO:0008017	microtubule binding	58	235	53	4.08	1.12
biological_process	GO:0050679	positive regulation of epithelial cell proliferation	56	93	53	9.95	1.11
biological_process	GO:0034142	toll-like receptor 4 signaling pathway	56	98	53	9.45	1.11
biological_process	GO:0006508	proteolysis	59	371	53	2.63	1.11
biological_process	GO:0033138	positive regulation of peptidyl-serine phosphorylation	55	66	53	13.77	1.1
biological_process	GO:0008063	Toll signaling pathway	55	82	53	11.09	1.1
biological_process	GO:0016032	viral reproduction	60	518	53	1.91	1.1
biological_process	GO:0002224	toll-like receptor signaling pathway	55	94	53	9.67	1.09
biological_process	GO:0000082	G1/S transition of mitotic cell cycle	56	181	53	5.11	1.09
biological_process	GO:0045665	negative regulation of neuron differentiation	54	59	53	15.13	1.08
biological_process	GO:0002755	MyD88-dependent toll-like receptor signaling pathway	54	91	53	9.81	1.07
molecular_function	GO:0008013	beta-catenin binding	54	91	53	9.81	1.07
biological_process	GO:0051216	cartilage development	54	99	53	9.02	1.07
biological_process	GO:0001938	positive regulation of endothelial cell proliferation	54	125	53	7.14	1.07
biological_process	GO:0000278	mitotic cell cycle	56	321	53	2.88	1.07
biological_process	GO:0044281	small molecule metabolic process	67	1322	53	0.84	1.07
biological_process	GO:0010468	regulation of gene expression	53	53	53	16.53	1.06
cellular_component	GO:0017053	transcriptional repressor complex	53	59	53	14.85	1.06
biological_process	GO:0060021	palate development	53	64	53	13.69	1.06
biological_process	GO:0048146	positive regulation of fibroblast proliferation	53	75	53	11.68	1.06
cellular_component	GO:0030529	ribonucleoprotein complex	54	147	53	6.07	1.06
molecular_function	GO:0004221	ubiquitin thiolesterase activity	53	127	53	6.9	1.05
biological_process	GO:0045669	positive regulation of osteoblast differentiation	52	60	53	14.33	1.04
biological_process	GO:0001658	branching involved in ureteric bud morphogenesis	52	63	53	13.64	1.04
biological_process	GO:0034134	toll-like receptor 2 signaling pathway	52	86	53	9.99	1.04
cellular_component	GO:0016020	membrane	61	941	53	1.07	1.04
biological_process	GO:0043524	negative regulation of neuron apoptotic process	52	120	53	7.16	1.03
molecular_function	GO:0001078	RNA polymerase II core promoter proximal region sequence-specific DNA binding transcription factor activity involved in negative regulation of transcription	51	51	53	16.53	1.02
biological_process	GO:0048485	sympathetic nervous system development	51	53	53	15.91	1.02
molecular_function	GO:0001047	core promoter binding	51	53	53	15.91	1.02
molecular_function	GO:0046332	SMAD binding	51	65	53	12.97	1.02
biological_process	GO:0034138	toll-like receptor 3 signaling pathway	51	82	53	10.28	1.02
cellular_component	GO:0016607	nuclear speck	51	102	53	8.26	1.01
biological_process	GO:0008380	RNA splicing	52	201	53	4.28	1.01
biological_process	GO:0045727	positive regulation of translation	50	50	53	16.53	1
biological_process	GO:0034130	toll-like receptor 1 signaling pathway	50	70	53	11.81	1
biological_process	GO:0050680	negative regulation of epithelial cell proliferation	50	70	53	11.81	1
biological_process	GO:0097193	intrinsic apoptotic signaling pathway	50	73	53	11.32	1
molecular_function	GO:0008201	heparin binding	51	152	53	5.55	1
molecular_function	GO:0008022	protein C-terminus binding	51	159	53	5.3	1
molecular_function	GO:0004871	signal transducer activity	53	381	53	2.3	1
biological_process	GO:0010862	positive regulation of pathway-restricted SMAD protein phosphorylation	49	56	53	14.46	0.98
biological_process	GO:0035666	TRIF-dependent toll-like receptor signaling pathway	49	67	53	12.09	0.98
biological_process	GO:0008543	fibroblast growth factor receptor signaling pathway	50	143	53	5.78	0.98
biological_process	GO:0007173	epidermal growth factor receptor signaling pathway	49	143	53	5.66	0.96
molecular_function	GO:0005125	cytokine activity	48	91	53	8.72	0.95
biological_process	GO:0030168	platelet activation	49	237	53	3.42	0.95
biological_process	GO:0046777	protein autophosphorylation	49	237	53	3.42	0.95
biological_process	GO:0007155	cell adhesion	50	297	53	2.78	0.95
biological_process	GO:0030501	positive regulation of bone mineralization	47	54	53	14.39	0.94
biological_process	GO:0002756	MyD88-independent toll-like receptor signaling pathway	47	63	53	12.33	0.94
biological_process	GO:0008360	regulation of cell shape	48	144	53	5.51	0.94
biological_process	GO:0009267	cellular response to starvation	49	250	53	3.24	0.94
molecular_function	GO:0008083	growth factor activity	47	105	53	7.4	0.93
biological_process	GO:0051897	positive regulation of protein kinase B signaling cascade	47	107	53	7.26	0.93
cellular_component	GO:0043231	intracellular membrane-bounded organelle	52	661	53	1.3	0.93
molecular_function	GO:0004879	ligand-activated sequence-specific DNA binding RNA polymerase II transcription factor activity	46	51	53	14.91	0.92
molecular_function	GO:0004872	receptor activity	48	292	53	2.72	0.92
biological_process	GO:0009653	anatomical structure morphogenesis	46	111	53	6.85	0.91
molecular_function	GO:0004843	ubiquitin-specific protease activity	46	138	53	5.51	0.91
molecular_function	GO:0000981	sequence-specific DNA binding RNA polymerase II transcription factor activity	45	45	53	16.53	0.9
biological_process	GO:0001947	heart looping	45	53	53	14.03	0.9
molecular_function	GO:0046966	thyroid hormone receptor binding	45	53	53	14.03	0.9
molecular_function	GO:0042826	histone deacetylase binding	45	62	53	12	0.9
biological_process	GO:0008584	male gonad development	45	66	53	11.27	0.9
biological_process	GO:0032869	cellular response to insulin stimulus	45	87	53	8.55	0.89
molecular_function	GO:0043027	cysteine-type endopeptidase inhibitor activity involved in apoptotic process	45	89	53	8.36	0.89
molecular_function	GO:0050681	androgen receptor binding	44	47	53	15.47	0.88
biological_process	GO:0032720	negative regulation of tumor necrosis factor production	44	55	53	13.22	0.88
biological_process	GO:0048010	vascular endothelial growth factor receptor signaling pathway	44	56	53	12.99	0.88
molecular_function	GO:0002039	p53 binding	44	65	53	11.19	0.88
biological_process	GO:0043525	positive regulation of neuron apoptotic process	44	67	53	10.86	0.88
biological_process	GO:0016070	RNA metabolic process	46	257	53	2.96	0.88
biological_process	GO:0006469	negative regulation of protein kinase activity	44	85	53	8.56	0.87
biological_process	GO:0007411	axon guidance	46	328	53	2.32	0.87
cellular_component	GO:0071546	pi-body	43	49	53	14.51	0.86
biological_process	GO:0010811	positive regulation of cell-substrate adhesion	43	50	53	14.22	0.86
molecular_function	GO:0042056	chemoattractant activity	43	56	53	12.69	0.86
biological_process	GO:0006511	ubiquitin-dependent protein catabolic process	44	145	53	5.02	0.86
biological_process	GO:0006950	response to stress	44	148	53	4.91	0.86
biological_process	GO:0007417	central nervous system development	43	114	53	6.23	0.85
biological_process	GO:0016071	mRNA metabolic process	44	227	53	3.2	0.85
molecular_function	GO:0001071	nucleic acid binding transcription factor activity	42	42	53	16.53	0.84
biological_process	GO:0043922	negative regulation by host of viral transcription	42	43	53	16.15	0.84
biological_process	GO:0043124	negative regulation of I-kappaB kinase/NF-kappaB cascade	42	50	53	13.88	0.84
biological_process	GO:0030522	intracellular receptor mediated signaling pathway	42	54	53	12.86	0.84
biological_process	GO:0002062	chondrocyte differentiation	42	56	53	12.4	0.84
biological_process	GO:0009615	response to virus	43	163	53	4.36	0.84
biological_process	GO:0001501	skeletal system development	42	107	53	6.49	0.83
molecular_function	GO:0005085	guanyl-nucleotide exchange factor activity	42	139	53	4.99	0.83
biological_process	GO:0000398	mRNA splicing, via spliceosome	43	205	53	3.47	0.83
biological_process	GO:0006417	regulation of translation	41	41	53	16.53	0.82
biological_process	GO:0001657	ureteric bud development	41	44	53	15.4	0.82
molecular_function	GO:0046983	protein dimerization activity	42	176	53	3.94	0.82
cellular_component	GO:0016021	integral to membrane	49	1034	53	0.78	0.82
cellular_component	GO:0005911	cell-cell junction	41	126	53	5.38	0.81
biological_process	GO:0000381	regulation of alternative mRNA splicing, via spliceosome	40	40	53	16.53	0.8
biological_process	GO:0090190	positive regulation of branching involved in ureteric bud morphogenesis	40	43	53	15.38	0.8
biological_process	GO:2001022	positive regulation of response to DNA damage stimulus	40	47	53	14.07	0.8
biological_process	GO:0007140	male meiosis	40	51	53	12.96	0.8
cellular_component	GO:0005851	eukaryotic translation initiation factor 2B complex	40	53	53	12.48	0.8
biological_process	GO:0051403	stress-activated MAPK cascade	40	56	53	11.81	0.8
biological_process	GO:0016055	Wnt receptor signaling pathway	40	62	53	10.66	0.8
biological_process	GO:0010634	positive regulation of epithelial cell migration	40	64	53	10.33	0.8
biological_process	GO:0009953	dorsal/ventral pattern formation	40	76	53	8.7	0.8
biological_process	GO:0051260	protein homooligomerization	41	178	53	3.81	0.8
biological_process	GO:0009405	pathogenesis	45	675	53	1.1	0.8
biological_process	GO:0050728	negative regulation of inflammatory response	40	93	53	7.11	0.79
biological_process	GO:0000187	activation of MAPK activity	40	120	53	5.51	0.79
cellular_component	GO:0016592	mediator complex	39	46	53	14.01	0.78
biological_process	GO:0045599	negative regulation of fat cell differentiation	39	48	53	13.43	0.78
cellular_component	GO:0016605	PML body	39	85	53	7.58	0.77
molecular_function	GO:0047485	protein N-terminus binding	39	85	53	7.58	0.77
biological_process	GO:0030307	positive regulation of cell growth	39	92	53	7.01	0.77
biological_process	GO:0001937	negative regulation of endothelial cell proliferation	39	105	53	6.14	0.77
biological_process	GO:0036180	filamentous growth of a population of unicellular organisms in response to biotic stimulus	40	238	53	2.78	0.77
cellular_component	GO:0031012	extracellular matrix	40	241	53	2.74	0.77
cellular_component	GO:0015630	microtubule cytoskeleton	40	257	53	2.57	0.77
molecular_function	GO:0000983	RNA polymerase II core promoter sequence-specific DNA binding transcription factor activity	38	38	53	16.53	0.76
molecular_function	GO:0001105	RNA polymerase II transcription coactivator activity	38	38	53	16.53	0.76
molecular_function	GO:0001104	RNA polymerase II transcription cofactor activity	38	40	53	15.7	0.76
biological_process	GO:0045931	positive regulation of mitotic cell cycle	38	50	53	12.56	0.76
biological_process	GO:0048793	pronephros development	38	55	53	11.42	0.76
biological_process	GO:0050918	positive chemotaxis	38	56	53	11.22	0.76
biological_process	GO:0030177	positive regulation of Wnt receptor signaling pathway	38	63	53	9.97	0.76
biological_process	GO:0000086	G2/M transition of mitotic cell cycle	39	166	53	3.88	0.76
cellular_component	GO:0005764	lysosome	40	306	53	2.16	0.76
cellular_component	GO:0000785	chromatin	38	123	53	5.11	0.75
molecular_function	GO:0008144	drug binding	38	139	53	4.52	0.75
biological_process	GO:0030514	negative regulation of BMP signaling pathway	37	37	53	16.53	0.74
biological_process	GO:0043484	regulation of RNA splicing	37	37	53	16.53	0.74
biological_process	GO:0010332	response to gamma radiation	37	44	53	13.9	0.74
biological_process	GO:0014068	positive regulation of phosphatidylinositol 3-kinase cascade	37	80	53	7.64	0.74
biological_process	GO:0006413	translational initiation	38	199	53	3.16	0.74
biological_process	GO:0006955	immune response	39	401	53	1.61	0.73
biological_process	GO:0045666	positive regulation of neuron differentiation	36	52	53	11.44	0.72
biological_process	GO:0030855	epithelial cell differentiation	36	54	53	11.02	0.72
biological_process	GO:0030097	hemopoiesis	36	58	53	10.26	0.72
molecular_function	GO:0046523	S-methyl-5-thioribose-1-phosphate isomerase activity	36	58	53	10.26	0.72
biological_process	GO:0010595	positive regulation of endothelial cell migration	36	60	53	9.92	0.72
biological_process	GO:0019509	L-methionine salvage from methylthioadenosine	36	68	53	8.75	0.72
biological_process	GO:0045860	positive regulation of protein kinase activity	36	68	53	8.75	0.72
biological_process	GO:0050852	T cell receptor signaling pathway	36	110	53	5.41	0.71
cellular_component	GO:0005789	endoplasmic reticulum membrane	39	556	53	1.16	0.71
biological_process	GO:0002053	positive regulation of mesenchymal cell proliferation	35	37	53	15.64	0.7
molecular_function	GO:0030331	estrogen receptor binding	35	46	53	12.58	0.7
biological_process	GO:0030512	negative regulation of transforming growth factor beta receptor signaling pathway	35	54	53	10.71	0.7
biological_process	GO:0043406	positive regulation of MAP kinase activity	35	67	53	8.63	0.7
biological_process	GO:0018105	peptidyl-serine phosphorylation	35	68	53	8.51	0.7
biological_process	GO:0006368	transcription elongation from RNA polymerase II promoter	35	69	53	8.38	0.7
biological_process	GO:0008286	insulin receptor signaling pathway	36	163	53	3.65	0.7
biological_process	GO:0006412	translation	37	363	53	1.68	0.7
biological_process	GO:0050731	positive regulation of peptidyl-tyrosine phosphorylation	35	88	53	6.57	0.69
biological_process	GO:0042127	regulation of cell proliferation	35	89	53	6.5	0.69
biological_process	GO:0043410	positive regulation of MAPK cascade	35	95	53	6.09	0.69
cellular_component	GO:0005901	caveola	35	108	53	5.36	0.69
cellular_component	GO:0000124	SAGA complex	34	35	53	16.06	0.68
biological_process	GO:0045787	positive regulation of cell cycle	34	43	53	13.07	0.68
biological_process	GO:0050921	positive regulation of chemotaxis	34	54	53	10.41	0.68
biological_process	GO:0033554	cellular response to stress	34	70	53	8.03	0.68
cellular_component	GO:0030141	secretory granule	34	76	53	7.39	0.68
biological_process	GO:0035556	intracellular signal transduction	35	162	53	3.57	0.68
biological_process	GO:0006979	response to oxidative stress	35	169	53	3.42	0.68
biological_process	GO:0007186	G-protein coupled receptor signaling pathway	36	359	53	1.66	0.68
molecular_function	GO:0032403	protein complex binding	34	90	53	6.24	0.67
biological_process	GO:0044182	filamentous growth of a population of unicellular organisms	34	141	53	3.99	0.67
cellular_component	GO:0045121	membrane raft	35	244	53	2.37	0.67
biological_process	GO:0044267	cellular protein metabolic process	36	392	53	1.52	0.67
biological_process	GO:0060389	pathway-restricted SMAD protein phosphorylation	33	35	53	15.58	0.66
biological_process	GO:0007259	JAK-STAT cascade	33	49	53	11.13	0.66
biological_process	GO:0002092	positive regulation of receptor internalization	33	50	53	10.91	0.66
biological_process	GO:0001755	neural crest cell migration	33	51	53	10.7	0.66
biological_process	GO:0071347	cellular response to interleukin-1	33	69	53	7.91	0.66
molecular_function	GO:0008233	peptidase activity	34	157	53	3.58	0.66
biological_process	GO:0000184	nuclear-transcribed mRNA catabolic process, nonsense-mediated decay	34	162	53	3.47	0.66
biological_process	GO:0071216	cellular response to biotic stimulus	34	222	53	2.53	0.66
biological_process	GO:0044011	single-species biofilm formation on inanimate substrate	33	91	53	5.99	0.65
biological_process	GO:0006302	double-strand break repair	33	152	53	3.59	0.65
biological_process	GO:0045947	negative regulation of translational initiation	32	32	53	16.53	0.64
biological_process	GO:0048762	mesenchymal cell differentiation	32	33	53	16.03	0.64
biological_process	GO:0043536	positive regulation of blood vessel endothelial cell migration	32	37	53	14.3	0.64
biological_process	GO:0000060	protein import into nucleus, translocation	32	48	53	11.02	0.64
cellular_component	GO:0010494	cytoplasmic stress granule	32	55	53	9.62	0.64
biological_process	GO:0000902	cell morphogenesis	32	76	53	6.96	0.64
biological_process	GO:0030182	neuron differentiation	32	81	53	6.53	0.64
cellular_component	GO:0030018	Z disc	32	101	53	5.24	0.63
biological_process	GO:0000075	cell cycle checkpoint	32	140	53	3.78	0.63
biological_process	GO:0060333	interferon-gamma-mediated signaling pathway	32	141	53	3.75	0.63
biological_process	GO:0031647	regulation of protein stability	31	31	53	16.53	0.62
biological_process	GO:0030902	hindbrain development	31	34	53	15.07	0.62
biological_process	GO:0032715	negative regulation of interleukin-6 production	31	36	53	14.23	0.62
biological_process	GO:0030949	positive regulation of vascular endothelial growth factor receptor signaling pathway	31	37	53	13.85	0.62
biological_process	GO:0048513	organ development	31	37	53	13.85	0.62
biological_process	GO:0090103	cochlea morphogenesis	31	37	53	13.85	0.62
biological_process	GO:0001707	mesoderm formation	31	43	53	11.92	0.62
biological_process	GO:0060395	SMAD protein signal transduction	31	43	53	11.92	0.62
biological_process	GO:0071222	cellular response to lipopolysaccharide	31	44	53	11.65	0.62
biological_process	GO:0070371	ERK1 and ERK2 cascade	31	47	53	10.9	0.62
biological_process	GO:0001570	vasculogenesis	31	48	53	10.68	0.62
biological_process	GO:0071260	cellular response to mechanical stimulus	31	69	53	7.43	0.62
molecular_function	GO:0030246	carbohydrate binding	31	84	53	6.1	0.61
biological_process	GO:0006816	calcium ion transport	31	120	53	4.27	0.61
biological_process	GO:0016337	cell-cell adhesion	31	127	53	4.03	0.61
biological_process	GO:0002740	negative regulation of cytokine secretion involved in immune response	30	30	53	16.53	0.6
molecular_function	GO:0001106	RNA polymerase II transcription corepressor activity	30	31	53	16	0.6
biological_process	GO:2000573	positive regulation of DNA biosynthetic process	30	33	53	15.03	0.6
biological_process	GO:0032967	positive regulation of collagen biosynthetic process	30	34	53	14.58	0.6
biological_process	GO:0060317	cardiac epithelial to mesenchymal transition	30	34	53	14.58	0.6
biological_process	GO:0009880	embryonic pattern specification	30	35	53	14.17	0.6
biological_process	GO:0045671	negative regulation of osteoclast differentiation	30	35	53	14.17	0.6
biological_process	GO:0001933	negative regulation of protein phosphorylation	30	36	53	13.77	0.6
biological_process	GO:0071364	cellular response to epidermal growth factor stimulus	30	37	53	13.4	0.6
biological_process	GO:0007519	skeletal muscle tissue development	30	41	53	12.09	0.6
biological_process	GO:0007422	peripheral nervous system development	30	42	53	11.81	0.6
biological_process	GO:0032526	response to retinoic acid	30	43	53	11.53	0.6
biological_process	GO:0042771	intrinsic apoptotic signaling pathway in response to DNA damage by p53 class mediator	30	44	53	11.27	0.6
molecular_function	GO:0003712	transcription cofactor activity	30	54	53	9.18	0.6
biological_process	GO:0001541	ovarian follicle development	30	56	53	8.86	0.6
molecular_function	GO:0043130	ubiquitin binding	30	62	53	8	0.6
biological_process	GO:0048015	phosphatidylinositol-mediated signaling	30	76	53	6.52	0.6
biological_process	GO:0042493	response to drug	31	220	53	2.33	0.6
biological_process	GO:0051726	regulation of cell cycle	30	100	53	4.96	0.59
cellular_component	GO:0009897	external side of plasma membrane	30	111	53	4.47	0.59
biological_process	GO:0006879	cellular iron ion homeostasis	30	114	53	4.35	0.59
biological_process	GO:0042384	cilium assembly	30	133	53	3.73	0.59
biological_process	GO:0010718	positive regulation of epithelial to mesenchymal transition	29	30	53	15.98	0.58
biological_process	GO:0002244	hematopoietic progenitor cell differentiation	29	31	53	15.46	0.58
molecular_function	GO:0043425	bHLH transcription factor binding	29	31	53	15.46	0.58
biological_process	GO:0033137	negative regulation of peptidyl-serine phosphorylation	29	32	53	14.98	0.58
biological_process	GO:0032760	positive regulation of tumor necrosis factor production	29	36	53	13.32	0.58
biological_process	GO:0035924	cellular response to vascular endothelial growth factor stimulus	29	37	53	12.96	0.58
biological_process	GO:0048484	enteric nervous system development	29	37	53	12.96	0.58
biological_process	GO:0031018	endocrine pancreas development	29	39	53	12.29	0.58
biological_process	GO:0002040	sprouting angiogenesis	29	40	53	11.98	0.58
biological_process	GO:0045019	negative regulation of nitric oxide biosynthetic process	29	42	53	11.41	0.58
biological_process	GO:0034644	cellular response to UV	29	47	53	10.2	0.58
biological_process	GO:0050715	positive regulation of cytokine secretion	29	49	53	9.78	0.58
molecular_function	GO:0003730	mRNA 3'-UTR binding	29	50	53	9.59	0.58
biological_process	GO:0000186	activation of MAPKK activity	29	57	53	8.41	0.58
biological_process	GO:0043407	negative regulation of MAP kinase activity	29	63	53	7.61	0.58
biological_process	GO:0000209	protein polyubiquitination	29	122	53	3.93	0.57
biological_process	GO:0072162	metanephric mesenchymal cell differentiation	28	29	53	15.96	0.56
molecular_function	GO:0035035	histone acetyltransferase binding	28	29	53	15.96	0.56
molecular_function	GO:0033613	activating transcription factor binding	28	30	53	15.43	0.56
biological_process	GO:0010740	positive regulation of intracellular protein kinase cascade	28	31	53	14.93	0.56
molecular_function	GO:0000993	RNA polymerase II core binding	28	32	53	14.46	0.56
biological_process	GO:0001656	metanephros development	28	33	53	14.02	0.56
biological_process	GO:0050718	positive regulation of interleukin-1 beta secretion	28	33	53	14.02	0.56
molecular_function	GO:0042054	histone methyltransferase activity	28	33	53	14.02	0.56
cellular_component	GO:0043186	P granule	28	37	53	12.51	0.56
biological_process	GO:0046627	negative regulation of insulin receptor signaling pathway	28	38	53	12.18	0.56
biological_process	GO:0042472	inner ear morphogenesis	28	39	53	11.87	0.56
biological_process	GO:0007498	mesoderm development	28	43	53	10.76	0.56
biological_process	GO:0022008	neurogenesis	28	47	53	9.85	0.56
biological_process	GO:0000226	microtubule cytoskeleton organization	28	52	53	8.9	0.56
biological_process	GO:0030154	cell differentiation	28	60	53	7.71	0.56
molecular_function	GO:0032947	protein complex scaffold	28	70	53	6.61	0.56
biological_process	GO:0006406	mRNA export from nucleus	28	83	53	5.58	0.56
molecular_function	GO:0004197	cysteine-type endopeptidase activity	28	83	53	5.58	0.56
cellular_component	GO:0005938	cell cortex	28	94	53	4.92	0.55
biological_process	GO:0008217	regulation of blood pressure	28	100	53	4.63	0.55
molecular_function	GO:0003684	damaged DNA binding	28	117	53	3.96	0.55
biological_process	GO:0044255	cellular lipid metabolic process	28	142	53	3.26	0.55
cellular_component	GO:0030496	midbody	28	143	53	3.24	0.55
biological_process	GO:0016477	cell migration	28	159	53	2.91	0.55
biological_process	GO:0006342	chromatin silencing	27	27	53	16.53	0.54
biological_process	GO:0031047	gene silencing by RNA	27	27	53	16.53	0.54
biological_process	GO:0031053	primary miRNA processing	27	27	53	16.53	0.54
biological_process	GO:0080111	DNA demethylation	27	27	53	16.53	0.54
molecular_function	GO:0001102	RNA polymerase II activating transcription factor binding	27	27	53	16.53	0.54
biological_process	GO:0030518	intracellular steroid hormone receptor signaling pathway	27	29	53	15.39	0.54
biological_process	GO:0061036	positive regulation of cartilage development	27	29	53	15.39	0.54
biological_process	GO:0071158	positive regulation of cell cycle arrest	27	29	53	15.39	0.54
biological_process	GO:0090037	positive regulation of protein kinase C signaling cascade	27	29	53	15.39	0.54
molecular_function	GO:0051864	histone demethylase activity (H3-K36 specific)	27	29	53	15.39	0.54
biological_process	GO:0070544	histone H3-K36 demethylation	27	30	53	14.88	0.54
biological_process	GO:0003151	outflow tract morphogenesis	27	33	53	13.52	0.54
biological_process	GO:0034394	protein localization to cell surface	27	36	53	12.4	0.54
biological_process	GO:0033209	tumor necrosis factor-mediated signaling pathway	27	39	53	11.44	0.54
biological_process	GO:0045595	regulation of cell differentiation	27	39	53	11.44	0.54
biological_process	GO:0042476	odontogenesis	27	41	53	10.89	0.54
biological_process	GO:0060548	negative regulation of cell death	27	43	53	10.38	0.54
biological_process	GO:0035872	nucleotide-binding domain, leucine rich repeat containing receptor signaling pathway	27	44	53	10.14	0.54
biological_process	GO:0051928	positive regulation of calcium ion transport	27	45	53	9.92	0.54
biological_process	GO:0002548	monocyte chemotaxis	27	47	53	9.5	0.54
biological_process	GO:0071560	cellular response to transforming growth factor beta stimulus	27	47	53	9.5	0.54
biological_process	GO:0010842	retina layer formation	27	50	53	8.93	0.54
molecular_function	GO:0043498	cell surface binding	27	52	53	8.58	0.54
molecular_function	GO:0035064	methylated histone residue binding	27	68	53	6.56	0.54
biological_process	GO:0030178	negative regulation of Wnt receptor signaling pathway	27	80	53	5.58	0.54
biological_process	GO:0006260	DNA replication	28	199	53	2.33	0.54
biological_process	GO:0006874	cellular calcium ion homeostasis	27	90	53	4.96	0.53
biological_process	GO:0050796	regulation of insulin secretion	27	90	53	4.96	0.53
molecular_function	GO:0005506	iron ion binding	27	136	53	3.28	0.53
biological_process	GO:0032793	positive regulation of CREB transcription factor activity	26	26	53	16.53	0.52
biological_process	GO:0061418	regulation of transcription from RNA polymerase II promoter in response to hypoxia	26	26	53	16.53	0.52
molecular_function	GO:0000977	RNA polymerase II regulatory region sequence-specific DNA binding	26	26	53	16.53	0.52
biological_process	GO:0032270	positive regulation of cellular protein metabolic process	26	27	53	15.92	0.52
biological_process	GO:1900189	positive regulation of cell adhesion involved in single-species biofilm formation	26	27	53	15.92	0.52
biological_process	GO:0018026	peptidyl-lysine monomethylation	26	29	53	14.82	0.52
molecular_function	GO:0048018	receptor agonist activity	26	29	53	14.82	0.52
biological_process	GO:0002237	response to molecule of bacterial origin	26	30	53	14.33	0.52
biological_process	GO:0070723	response to cholesterol	26	32	53	13.43	0.52
biological_process	GO:0045862	positive regulation of proteolysis	26	33	53	13.02	0.52
biological_process	GO:0030318	melanocyte differentiation	26	34	53	12.64	0.52
molecular_function	GO:0004402	histone acetyltransferase activity	26	41	53	10.48	0.52
biological_process	GO:0000080	G1 phase of mitotic cell cycle	26	43	53	9.99	0.52
biological_process	GO:0071300	cellular response to retinoic acid	26	51	53	8.43	0.52
cellular_component	GO:0031965	nuclear membrane	27	199	53	2.24	0.52
biological_process	GO:0006935	chemotaxis	27	225	53	1.98	0.52
molecular_function	GO:0016887	ATPase activity	27	243	53	1.84	0.52
cellular_component	GO:0005819	spindle	26	92	53	4.67	0.51
biological_process	GO:0051607	defense response to virus	26	96	53	4.48	0.51
biological_process	GO:0006006	glucose metabolic process	26	128	53	3.36	0.51
cellular_component	GO:0043025	neuronal cell body	26	139	53	3.09	0.51
biological_process	GO:0007166	cell surface receptor signaling pathway	26	157	53	2.74	0.51
biological_process	GO:0031648	protein destabilization	25	25	53	16.53	0.5
biological_process	GO:0045013	carbon catabolite repression of transcription	25	25	53	16.53	0.5
biological_process	GO:0045656	negative regulation of monocyte differentiation	25	25	53	16.53	0.5
biological_process	GO:0001502	cartilage condensation	25	27	53	15.31	0.5
biological_process	GO:0001894	tissue homeostasis	25	29	53	14.25	0.5
biological_process	GO:0032757	positive regulation of interleukin-8 production	25	29	53	14.25	0.5
biological_process	GO:0051782	negative regulation of cell division	25	30	53	13.77	0.5
biological_process	GO:0043122	regulation of I-kappaB kinase/NF-kappaB cascade	25	31	53	13.33	0.5
biological_process	GO:0032148	activation of protein kinase B activity	25	32	53	12.91	0.5
biological_process	GO:2000352	negative regulation of endothelial cell apoptotic process	25	33	53	12.52	0.5
cellular_component	GO:0000118	histone deacetylase complex	25	33	53	12.52	0.5
biological_process	GO:0016568	chromatin modification	25	34	53	12.15	0.5
biological_process	GO:0007368	determination of left/right symmetry	25	38	53	10.87	0.5
biological_process	GO:0051276	chromosome organization	25	38	53	10.87	0.5
biological_process	GO:0032147	activation of protein kinase activity	25	39	53	10.6	0.5
biological_process	GO:0007286	spermatid development	25	40	53	10.33	0.5
biological_process	GO:0030282	bone mineralization	25	41	53	10.08	0.5
biological_process	GO:0051894	positive regulation of focal adhesion assembly	25	43	53	9.61	0.5
molecular_function	GO:0030295	protein kinase activator activity	25	44	53	9.39	0.5
biological_process	GO:0031663	lipopolysaccharide-mediated signaling pathway	25	47	53	8.79	0.5
biological_process	GO:0008406	gonad development	25	80	53	5.17	0.5
biological_process	GO:0007409	axonogenesis	25	97	53	4.26	0.49
biological_process	GO:0006289	nucleotide-excision repair	25	142	53	2.91	0.49
biological_process	GO:0033159	negative regulation of protein import into nucleus, translocation	24	24	53	16.53	0.48
biological_process	GO:0045662	negative regulation of myoblast differentiation	24	24	53	16.53	0.48
biological_process	GO:0048255	mRNA stabilization	24	24	53	16.53	0.48
biological_process	GO:0090184	positive regulation of kidney development	24	24	53	16.53	0.48
molecular_function	GO:0036002	pre-mRNA binding	24	24	53	16.53	0.48
biological_process	GO:0032204	regulation of telomere maintenance	24	26	53	15.26	0.48
biological_process	GO:0030889	negative regulation of B cell proliferation	24	27	53	14.69	0.48
biological_process	GO:0051781	positive regulation of cell division	24	29	53	13.68	0.48
biological_process	GO:0051384	response to glucocorticoid stimulus	24	30	53	13.22	0.48
biological_process	GO:0043116	negative regulation of vascular permeability	24	31	53	12.8	0.48
biological_process	GO:2000543	positive regulation of gastrulation	24	31	53	12.8	0.48
biological_process	GO:0051402	neuron apoptotic process	24	43	53	9.23	0.48
biological_process	GO:0090263	positive regulation of canonical Wnt receptor signaling pathway	24	49	53	8.1	0.48
biological_process	GO:0072659	protein localization to plasma membrane	24	55	53	7.21	0.48
biological_process	GO:0007254	JNK cascade	24	59	53	6.72	0.48
biological_process	GO:0090200	positive regulation of release of cytochrome c from mitochondria	24	66	53	6.01	0.48
molecular_function	GO:0016301	kinase activity	24	67	53	5.92	0.48
cellular_component	GO:0000151	ubiquitin ligase complex	24	70	53	5.67	0.48
biological_process	GO:0045739	positive regulation of DNA repair	24	72	53	5.51	0.48
biological_process	GO:0045927	positive regulation of growth	24	76	53	5.22	0.48
biological_process	GO:0007517	muscle organ development	24	81	53	4.9	0.48
molecular_function	GO:0000287	magnesium ion binding	26	428	53	1	0.48
biological_process	GO:0007243	intracellular protein kinase cascade	24	101	53	3.93	0.47
molecular_function	GO:0008094	DNA-dependent ATPase activity	24	111	53	3.57	0.47
biological_process	GO:0010756	positive regulation of plasminogen activation	23	23	53	16.53	0.46
biological_process	GO:0032922	circadian regulation of gene expression	23	23	53	16.53	0.46
cellular_component	GO:0032993	protein-DNA complex	23	23	53	16.53	0.46
biological_process	GO:0032800	receptor biosynthetic process	23	24	53	15.84	0.46
biological_process	GO:0048557	embryonic digestive tract morphogenesis	23	24	53	15.84	0.46
biological_process	GO:0006978	DNA damage response, signal transduction by p53 class mediator resulting in transcription of p21 class mediator	23	25	53	15.21	0.46
cellular_component	GO:0008023	transcription elongation factor complex	23	25	53	15.21	0.46
biological_process	GO:0034720	histone H3-K4 demethylation	23	26	53	14.62	0.46
biological_process	GO:0071407	cellular response to organic cyclic compound	23	26	53	14.62	0.46
cellular_component	GO:0016604	nuclear body	23	26	53	14.62	0.46
biological_process	GO:0045648	positive regulation of erythrocyte differentiation	23	28	53	13.58	0.46
molecular_function	GO:0016706	oxidoreductase activity, acting on paired donors, with incorporation or reduction of molecular oxygen, 2-oxoglutarate as one donor, and incorporation of one atom each of oxygen into both donors	23	28	53	13.58	0.46
biological_process	GO:0032355	response to estradiol stimulus	23	29	53	13.11	0.46
biological_process	GO:0001935	endothelial cell proliferation	23	30	53	12.67	0.46
biological_process	GO:0043010	camera-type eye development	23	31	53	12.26	0.46
biological_process	GO:0043392	negative regulation of DNA binding	23	31	53	12.26	0.46
biological_process	GO:0072661	protein targeting to plasma membrane	23	32	53	11.88	0.46
biological_process	GO:0034097	response to cytokine stimulus	23	35	53	10.86	0.46
biological_process	GO:0032689	negative regulation of interferon-gamma production	23	38	53	10	0.46
biological_process	GO:0019933	cAMP-mediated signaling	23	42	53	9.05	0.46
biological_process	GO:0032436	positive regulation of proteasomal ubiquitin-dependent protein catabolic process	23	42	53	9.05	0.46
biological_process	GO:0031398	positive regulation of protein ubiquitination	23	46	53	8.26	0.46
biological_process	GO:0046330	positive regulation of JNK cascade	23	52	53	7.31	0.46
biological_process	GO:0071277	cellular response to calcium ion	23	56	53	6.79	0.46
biological_process	GO:0032496	response to lipopolysaccharide	23	57	53	6.67	0.46
molecular_function	GO:0043621	protein self-association	23	60	53	6.34	0.46
biological_process	GO:0009887	organ morphogenesis	23	63	53	6.03	0.46
biological_process	GO:0007169	transmembrane receptor protein tyrosine kinase signaling pathway	23	64	53	5.94	0.46
biological_process	GO:0030593	neutrophil chemotaxis	23	65	53	5.85	0.46
molecular_function	GO:0004722	protein serine/threonine phosphatase activity	23	106	53	3.59	0.45
biological_process	GO:0000084	S phase of mitotic cell cycle	23	132	53	2.88	0.45
biological_process	GO:0009408	response to heat	23	140	53	2.72	0.45
biological_process	GO:0007010	cytoskeleton organization	23	149	53	2.55	0.45
biological_process	GO:0036170	filamentous growth of a population of unicellular organisms in response to starvation	23	194	53	1.96	0.45
biological_process	GO:0002904	positive regulation of B cell apoptotic process	22	22	53	16.53	0.44
biological_process	GO:0010719	negative regulation of epithelial to mesenchymal transition	22	22	53	16.53	0.44
biological_process	GO:0032968	positive regulation of transcription elongation from RNA polymerase II promoter	22	22	53	16.53	0.44
biological_process	GO:0048937	lateral line nerve glial cell development	22	22	53	16.53	0.44
biological_process	GO:0060008	Sertoli cell differentiation	22	22	53	16.53	0.44
molecular_function	GO:0000976	transcription regulatory region sequence-specific DNA binding	22	22	53	16.53	0.44
molecular_function	GO:0000988	protein binding transcription factor activity	22	22	53	16.53	0.44
biological_process	GO:0001823	mesonephros development	22	23	53	15.81	0.44
biological_process	GO:0060045	positive regulation of cardiac muscle cell proliferation	22	23	53	15.81	0.44
biological_process	GO:0070986	left/right axis specification	22	23	53	15.81	0.44
biological_process	GO:0048846	axon extension involved in axon guidance	22	25	53	14.55	0.44
biological_process	GO:0051045	negative regulation of membrane protein ectodomain proteolysis	22	25	53	14.55	0.44
biological_process	GO:0070423	nucleotide-binding oligomerization domain containing signaling pathway	22	25	53	14.55	0.44
molecular_function	GO:0001085	RNA polymerase II transcription factor binding	22	25	53	14.55	0.44
biological_process	GO:0043434	response to peptide hormone stimulus	22	26	53	13.99	0.44
biological_process	GO:0002088	lens development in camera-type eye	22	27	53	13.47	0.44
biological_process	GO:0034969	histone arginine methylation	22	27	53	13.47	0.44
biological_process	GO:0048706	embryonic skeletal system development	22	29	53	12.54	0.44
cellular_component	GO:0030315	T-tubule	22	30	53	12.12	0.44
biological_process	GO:0042327	positive regulation of phosphorylation	22	31	53	11.73	0.44
biological_process	GO:0048538	thymus development	22	31	53	11.73	0.44
biological_process	GO:0051930	regulation of sensory perception of pain	22	31	53	11.73	0.44
biological_process	GO:0045214	sarcomere organization	22	32	53	11.36	0.44
biological_process	GO:0045292	mRNA cis splicing, via spliceosome	22	32	53	11.36	0.44
biological_process	GO:0007249	I-kappaB kinase/NF-kappaB cascade	22	33	53	11.02	0.44
biological_process	GO:0009950	dorsal/ventral axis specification	22	36	53	10.1	0.44
biological_process	GO:0050727	regulation of inflammatory response	22	45	53	8.08	0.44
biological_process	GO:0045840	positive regulation of mitosis	22	51	53	7.13	0.44
biological_process	GO:0030324	lung development	22	52	53	6.99	0.44
biological_process	GO:0050790	regulation of catalytic activity	22	52	53	6.99	0.44
cellular_component	GO:0000932	cytoplasmic mRNA processing body	22	52	53	6.99	0.44
cellular_component	GO:0016363	nuclear matrix	22	52	53	6.99	0.44
biological_process	GO:0045444	fat cell differentiation	22	53	53	6.86	0.44
biological_process	GO:0045785	positive regulation of cell adhesion	22	54	53	6.73	0.44
biological_process	GO:0008015	blood circulation	22	56	53	6.49	0.44
biological_process	GO:0019722	calcium-mediated signaling	22	57	53	6.38	0.44
biological_process	GO:0050434	positive regulation of viral transcription	22	69	53	5.27	0.44
cellular_component	GO:0005874	microtubule	22	103	53	3.53	0.43
cellular_component	GO:0010008	endosome membrane	22	117	53	3.11	0.43
cellular_component	GO:0016323	basolateral plasma membrane	22	144	53	2.53	0.43
cellular_component	GO:0000139	Golgi membrane	23	336	53	1.13	0.43
biological_process	GO:0000083	regulation of transcription involved in G1/S phase of mitotic cell cycle	21	21	53	16.53	0.42
biological_process	GO:0033120	positive regulation of RNA splicing	21	21	53	16.53	0.42
biological_process	GO:0035606	peptidyl-cysteine S-trans-nitrosylation	21	21	53	16.53	0.42
biological_process	GO:0042789	mRNA transcription from RNA polymerase II promoter	21	21	53	16.53	0.42
biological_process	GO:2000611	positive regulation of thyroid hormone generation	21	21	53	16.53	0.42
molecular_function	GO:0035605	peptidyl-cysteine S-nitrosylase activity	21	21	53	16.53	0.42
biological_process	GO:0010804	negative regulation of tumor necrosis factor-mediated signaling pathway	21	22	53	15.78	0.42
biological_process	GO:0014850	response to muscle activity	21	22	53	15.78	0.42
cellular_component	GO:0016593	Cdc73/Paf1 complex	21	22	53	15.78	0.42
biological_process	GO:0046427	positive regulation of JAK-STAT cascade	21	23	53	15.09	0.42
molecular_function	GO:0000987	core promoter proximal region sequence-specific DNA binding	21	23	53	15.09	0.42
molecular_function	GO:0032453	histone demethylase activity (H3-K4 specific)	21	23	53	15.09	0.42
biological_process	GO:0017015	regulation of transforming growth factor beta receptor signaling pathway	21	24	53	14.46	0.42
biological_process	GO:0097191	extrinsic apoptotic signaling pathway	21	25	53	13.88	0.42
cellular_component	GO:0016585	chromatin remodeling complex	21	25	53	13.88	0.42
molecular_function	GO:0004365	glyceraldehyde-3-phosphate dehydrogenase (NAD+) (phosphorylating) activity	21	26	53	13.35	0.42
biological_process	GO:0034333	adherens junction assembly	21	28	53	12.4	0.42
biological_process	GO:0001708	cell fate specification	21	29	53	11.97	0.42
molecular_function	GO:0008353	RNA polymerase II carboxy-terminal domain kinase activity	21	29	53	11.97	0.42
biological_process	GO:0007369	gastrulation	21	30	53	11.57	0.42
molecular_function	GO:0031432	titin binding	21	31	53	11.2	0.42
biological_process	GO:0006611	protein export from nucleus	21	35	53	9.92	0.42
cellular_component	GO:0030016	myofibril	21	35	53	9.92	0.42
biological_process	GO:0009749	response to glucose stimulus	21	36	53	9.64	0.42
biological_process	GO:0030199	collagen fibril organization	21	36	53	9.64	0.42
molecular_function	GO:0008009	chemokine activity	21	36	53	9.64	0.42
biological_process	GO:0030890	positive regulation of B cell proliferation	21	37	53	9.38	0.42
biological_process	GO:0043966	histone H3 acetylation	21	41	53	8.47	0.42
molecular_function	GO:0043022	ribosome binding	21	50	53	6.94	0.42
biological_process	GO:0007049	cell cycle	21	55	53	6.31	0.42
biological_process	GO:0001944	vasculature development	21	61	53	5.69	0.42
biological_process	GO:0034613	cellular protein localization	21	61	53	5.69	0.42
biological_process	GO:0001558	regulation of cell growth	21	62	53	5.6	0.42
biological_process	GO:0008104	protein localization	21	62	53	5.6	0.42
biological_process	GO:0007346	regulation of mitotic cell cycle	21	66	53	5.26	0.42
biological_process	GO:0035810	positive regulation of urine volume	21	66	53	5.26	0.42
biological_process	GO:0042102	positive regulation of T cell proliferation	21	68	53	5.1	0.42
molecular_function	GO:0008307	structural constituent of muscle	21	70	53	4.96	0.42
cellular_component	GO:0005814	centriole	21	80	53	4.34	0.42
cellular_component	GO:0071013	catalytic step 2 spliceosome	21	85	53	4.08	0.42
biological_process	GO:0007605	sensory perception of sound	21	90	53	3.86	0.42
molecular_function	GO:0003824	catalytic activity	22	320	53	1.14	0.42
biological_process	GO:0006334	nucleosome assembly	21	93	53	3.73	0.41
molecular_function	GO:0017147	Wnt-protein binding	21	102	53	3.4	0.41
biological_process	GO:0006886	intracellular protein transport	21	112	53	3.1	0.41
cellular_component	GO:0030424	axon	21	152	53	2.28	0.41
cellular_component	GO:0030425	dendrite	21	158	53	2.2	0.41
cellular_component	GO:0016324	apical plasma membrane	21	216	53	1.61	0.41
biological_process	GO:0007268	synaptic transmission	22	380	53	0.96	0.41
biological_process	GO:0014718	positive regulation of satellite cell activation involved in skeletal muscle regeneration	20	20	53	16.53	0.4
biological_process	GO:0031054	pre-miRNA processing	20	20	53	16.53	0.4
biological_process	GO:0033234	negative regulation of protein sumoylation	20	20	53	16.53	0.4
biological_process	GO:0035278	negative regulation of translation involved in gene silencing by miRNA	20	20	53	16.53	0.4
biological_process	GO:0043488	regulation of mRNA stability	20	20	53	16.53	0.4
biological_process	GO:0048025	negative regulation of mRNA splicing, via spliceosome	20	20	53	16.53	0.4
biological_process	GO:0090009	primitive streak formation	20	20	53	16.53	0.4
biological_process	GO:0097264	self proteolysis	20	20	53	16.53	0.4
molecular_function	GO:0055103	ligase regulator activity	20	20	53	16.53	0.4
biological_process	GO:0043923	positive regulation by host of viral transcription	20	21	53	15.74	0.4
biological_process	GO:0045778	positive regulation of ossification	20	21	53	15.74	0.4
biological_process	GO:0045647	negative regulation of erythrocyte differentiation	20	22	53	15.03	0.4
molecular_function	GO:0070491	repressing transcription factor binding	20	22	53	15.03	0.4
biological_process	GO:0009791	post-embryonic development	20	23	53	14.37	0.4
biological_process	GO:0045618	positive regulation of keratinocyte differentiation	20	23	53	14.37	0.4
biological_process	GO:0045668	negative regulation of osteoblast differentiation	20	23	53	14.37	0.4
molecular_function	GO:0033192	calmodulin-dependent protein phosphatase activity	20	23	53	14.37	0.4
molecular_function	GO:0035241	protein-arginine omega-N monomethyltransferase activity	20	23	53	14.37	0.4
biological_process	GO:0040037	negative regulation of fibroblast growth factor receptor signaling pathway	20	24	53	13.77	0.4
biological_process	GO:0048599	oocyte development	20	24	53	13.77	0.4
biological_process	GO:0060547	negative regulation of necrotic cell death	20	24	53	13.77	0.4
biological_process	GO:0030326	embryonic limb morphogenesis	20	25	53	13.22	0.4
biological_process	GO:0050768	negative regulation of neurogenesis	20	25	53	13.22	0.4
molecular_function	GO:0031402	sodium ion binding	20	25	53	13.22	0.4
biological_process	GO:0051272	positive regulation of cellular component movement	20	26	53	12.71	0.4
biological_process	GO:0071425	hematopoietic stem cell proliferation	20	26	53	12.71	0.4
molecular_function	GO:0070577	histone acetyl-lysine binding	20	26	53	12.71	0.4
biological_process	GO:0045930	negative regulation of mitotic cell cycle	20	27	53	12.24	0.4
biological_process	GO:0016575	histone deacetylation	20	28	53	11.81	0.4
biological_process	GO:0032729	positive regulation of interferon-gamma production	20	28	53	11.81	0.4
biological_process	GO:0048286	lung alveolus development	20	28	53	11.81	0.4
biological_process	GO:0030224	monocyte differentiation	20	29	53	11.4	0.4
biological_process	GO:0045600	positive regulation of fat cell differentiation	20	29	53	11.4	0.4
biological_process	GO:0001702	gastrulation with mouth forming second	20	30	53	11.02	0.4
biological_process	GO:0010942	positive regulation of cell death	20	32	53	10.33	0.4
biological_process	GO:0031954	positive regulation of protein autophosphorylation	20	32	53	10.33	0.4
cellular_component	GO:0009898	internal side of plasma membrane	20	48	53	6.89	0.4
biological_process	GO:0001578	microtubule bundle formation	20	52	53	6.36	0.4
biological_process	GO:0071356	cellular response to tumor necrosis factor	20	53	53	6.24	0.4
cellular_component	GO:0043235	receptor complex	20	55	53	6.01	0.4
biological_process	GO:0030216	keratinocyte differentiation	20	59	53	5.6	0.4
biological_process	GO:0034605	cellular response to heat	20	75	53	4.41	0.4
biological_process	GO:0002576	platelet degranulation	20	80	53	4.13	0.4
biological_process	GO:0009636	response to toxin	20	85	53	3.89	0.4
biological_process	GO:0031175	neuron projection development	20	94	53	3.52	0.39
biological_process	GO:0043161	proteasomal ubiquitin-dependent protein catabolic process	20	98	53	3.37	0.39
biological_process	GO:0019058	viral infectious cycle	20	110	53	3.01	0.39
biological_process	GO:0003308	negative regulation of Wnt receptor signaling pathway involved in heart development	19	19	53	16.53	0.38
biological_process	GO:0006306	DNA methylation	19	19	53	16.53	0.38
biological_process	GO:0032753	positive regulation of interleukin-4 production	19	19	53	16.53	0.38
biological_process	GO:0035051	cardiac cell differentiation	19	19	53	16.53	0.38
biological_process	GO:0035360	positive regulation of peroxisome proliferator activated receptor signaling pathway	19	19	53	16.53	0.38
biological_process	GO:0051901	positive regulation of mitochondrial depolarization	19	19	53	16.53	0.38
molecular_function	GO:0001046	core promoter sequence-specific DNA binding	19	19	53	16.53	0.38
molecular_function	GO:0030371	translation repressor activity	19	19	53	16.53	0.38
biological_process	GO:0030878	thyroid gland development	19	20	53	15.7	0.38
biological_process	GO:0040019	positive regulation of embryonic development	19	20	53	15.7	0.38
biological_process	GO:0060384	innervation	19	20	53	15.7	0.38
molecular_function	GO:0004882	androgen receptor activity	19	20	53	15.7	0.38
biological_process	GO:0035909	aorta morphogenesis	19	21	53	14.96	0.38
biological_process	GO:0009967	positive regulation of signal transduction	19	22	53	14.28	0.38
biological_process	GO:0018027	peptidyl-lysine dimethylation	19	22	53	14.28	0.38
biological_process	GO:0032332	positive regulation of chondrocyte differentiation	19	22	53	14.28	0.38
biological_process	GO:0032873	negative regulation of stress-activated MAPK cascade	19	22	53	14.28	0.38
molecular_function	GO:0035242	protein-arginine omega-N asymmetric methyltransferase activity	19	22	53	14.28	0.38
biological_process	GO:0035970	peptidyl-threonine dephosphorylation	19	25	53	12.56	0.38
biological_process	GO:0060348	bone development	19	25	53	12.56	0.38
biological_process	GO:0014029	neural crest formation	19	26	53	12.08	0.38
molecular_function	GO:0051059	NF-kappaB binding	19	26	53	12.08	0.38
biological_process	GO:0001568	blood vessel development	19	27	53	11.63	0.38
biological_process	GO:0001942	hair follicle development	19	29	53	10.83	0.38
molecular_function	GO:0005161	platelet-derived growth factor receptor binding	19	31	53	10.13	0.38
biological_process	GO:0031397	negative regulation of protein ubiquitination	19	33	53	9.52	0.38
biological_process	GO:0043552	positive regulation of phosphatidylinositol 3-kinase activity	19	33	53	9.52	0.38
biological_process	GO:0000387	spliceosomal snRNP assembly	19	45	53	6.98	0.38
biological_process	GO:0030183	B cell differentiation	19	46	53	6.83	0.38
biological_process	GO:0046326	positive regulation of glucose import	19	50	53	6.28	0.38
biological_process	GO:0006887	exocytosis	19	51	53	6.16	0.38
biological_process	GO:0070534	protein K63-linked ubiquitination	19	51	53	6.16	0.38
cellular_component	GO:0005929	cilium	19	64	53	4.91	0.38
cellular_component	GO:0005876	spindle microtubule	19	65	53	4.83	0.38
biological_process	GO:0007265	Ras protein signal transduction	19	67	53	4.69	0.38
cellular_component	GO:0005912	adherens junction	19	67	53	4.69	0.38
cellular_component	GO:0000228	nuclear chromosome	19	69	53	4.55	0.38
molecular_function	GO:0005516	calmodulin binding	19	93	53	3.38	0.38
cellular_component	GO:0005759	mitochondrial matrix	20	251	53	1.32	0.38
molecular_function	GO:0030165	PDZ domain binding	19	114	53	2.75	0.37
cellular_component	GO:0005635	nuclear envelope	19	134	53	2.34	0.37
biological_process	GO:0016192	vesicle-mediated transport	19	166	53	1.89	0.37
biological_process	GO:0040007	growth	21	637	53	0.54	0.37
biological_process	GO:0003130	BMP signaling pathway involved in heart induction	18	18	53	16.53	0.36
biological_process	GO:0006356	regulation of transcription from RNA polymerase I promoter	18	18	53	16.53	0.36
biological_process	GO:0016246	RNA interference	18	18	53	16.53	0.36
molecular_function	GO:0000978	RNA polymerase II core promoter proximal region sequence-specific DNA binding	18	18	53	16.53	0.36
molecular_function	GO:0046975	histone methyltransferase activity (H3-K36 specific)	18	18	53	16.53	0.36
biological_process	GO:0002063	chondrocyte development	18	19	53	15.66	0.36
biological_process	GO:0006337	nucleosome disassembly	18	19	53	15.66	0.36
biological_process	GO:0014034	neural crest cell fate commitment	18	19	53	15.66	0.36
biological_process	GO:0048821	erythrocyte development	18	19	53	15.66	0.36
biological_process	GO:0061029	eyelid development in camera-type eye	18	19	53	15.66	0.36
biological_process	GO:0019827	stem cell maintenance	18	20	53	14.88	0.36
biological_process	GO:0044387	negative regulation of protein kinase activity by regulation of protein phosphorylation	18	20	53	14.88	0.36
biological_process	GO:2000503	positive regulation of natural killer cell chemotaxis	18	20	53	14.88	0.36
biological_process	GO:0019919	peptidyl-arginine methylation, to asymmetrical-dimethyl arginine	18	21	53	14.17	0.36
biological_process	GO:0030225	macrophage differentiation	18	21	53	14.17	0.36
biological_process	GO:0032755	positive regulation of interleukin-6 production	18	21	53	14.17	0.36
biological_process	GO:0001655	urogenital system development	18	22	53	13.52	0.36
biological_process	GO:0032733	positive regulation of interleukin-10 production	18	23	53	12.94	0.36
biological_process	GO:0042475	odontogenesis of dentin-containing tooth	18	23	53	12.94	0.36
biological_process	GO:0045638	negative regulation of myeloid cell differentiation	18	24	53	12.4	0.36
biological_process	GO:0050850	positive regulation of calcium-mediated signaling	18	24	53	12.4	0.36
cellular_component	GO:0000974	Prp19 complex	18	24	53	12.4	0.36
molecular_function	GO:0001968	fibronectin binding	18	25	53	11.9	0.36
biological_process	GO:0001706	endoderm formation	18	26	53	11.44	0.36
biological_process	GO:0001889	liver development	18	26	53	11.44	0.36
biological_process	GO:0006325	chromatin organization	18	27	53	11.02	0.36
biological_process	GO:0009948	anterior/posterior axis specification	18	27	53	11.02	0.36
biological_process	GO:0007584	response to nutrient	18	29	53	10.26	0.36
biological_process	GO:0003007	heart morphogenesis	18	30	53	9.92	0.36
biological_process	GO:0001775	cell activation	18	31	53	9.6	0.36
molecular_function	GO:0005109	frizzled binding	18	31	53	9.6	0.36
biological_process	GO:0002042	cell migration involved in sprouting angiogenesis	18	32	53	9.3	0.36
biological_process	GO:0051591	response to cAMP	18	34	53	8.75	0.36
biological_process	GO:0048754	branching morphogenesis of a tube	18	36	53	8.26	0.36
molecular_function	GO:0008135	translation factor activity, nucleic acid binding	18	36	53	8.26	0.36
molecular_function	GO:0043499	eukaryotic cell surface binding	18	37	53	8.04	0.36
biological_process	GO:0045740	positive regulation of DNA replication	18	38	53	7.83	0.36
biological_process	GO:0061098	positive regulation of protein tyrosine kinase activity	18	38	53	7.83	0.36
biological_process	GO:2001244	positive regulation of intrinsic apoptotic signaling pathway	18	38	53	7.83	0.36
cellular_component	GO:0031093	platelet alpha granule lumen	18	47	53	6.33	0.36
cellular_component	GO:0000781	chromosome, telomeric region	18	48	53	6.2	0.36
biological_process	GO:0007610	behavior	18	50	53	5.95	0.36
cellular_component	GO:0005932	microtubule basal body	18	63	53	4.72	0.36
biological_process	GO:0006397	mRNA processing	18	72	53	4.13	0.36
biological_process	GO:0051865	protein autoubiquitination	18	73	53	4.08	0.36
molecular_function	GO:0005179	hormone activity	18	73	53	4.08	0.36
biological_process	GO:0006309	apoptotic DNA fragmentation	18	74	53	4.02	0.36
biological_process	GO:0034599	cellular response to oxidative stress	18	84	53	3.54	0.36
molecular_function	GO:0005507	copper ion binding	19	272	53	1.15	0.36
biological_process	GO:0006629	lipid metabolic process	18	160	53	1.86	0.35
molecular_function	GO:0003697	single-stranded DNA binding	18	171	53	1.74	0.35
cellular_component	GO:0005618	cell wall	20	788	53	0.42	0.35
biological_process	GO:0032784	regulation of DNA-dependent transcription, elongation	17	17	53	16.53	0.34
biological_process	GO:0035136	forelimb morphogenesis	17	17	53	16.53	0.34
biological_process	GO:0035630	bone mineralization involved in bone maturation	17	17	53	16.53	0.34
biological_process	GO:0045165	cell fate commitment	17	17	53	16.53	0.34
biological_process	GO:0048026	positive regulation of mRNA splicing, via spliceosome	17	17	53	16.53	0.34
biological_process	GO:0060686	negative regulation of prostatic bud formation	17	17	53	16.53	0.34
biological_process	GO:0060766	negative regulation of androgen receptor signaling pathway	17	17	53	16.53	0.34
biological_process	GO:0060964	regulation of gene silencing by miRNA	17	17	53	16.53	0.34
biological_process	GO:0072136	metanephric mesenchymal cell proliferation involved in metanephros development	17	17	53	16.53	0.34
biological_process	GO:0072308	negative regulation of metanephric nephron tubule epithelial cell differentiation	17	17	53	16.53	0.34
biological_process	GO:2000726	negative regulation of cardiac muscle cell differentiation	17	17	53	16.53	0.34
biological_process	GO:2001028	positive regulation of endothelial cell chemotaxis	17	17	53	16.53	0.34
biological_process	GO:0010564	regulation of cell cycle process	17	18	53	15.61	0.34
biological_process	GO:0010839	negative regulation of keratinocyte proliferation	17	18	53	15.61	0.34
biological_process	GO:0014846	esophagus smooth muscle contraction	17	18	53	15.61	0.34
biological_process	GO:0021537	telencephalon development	17	18	53	15.61	0.34
biological_process	GO:0030520	intracellular estrogen receptor signaling pathway	17	18	53	15.61	0.34
biological_process	GO:0072075	metanephric mesenchyme development	17	18	53	15.61	0.34
biological_process	GO:2001141	regulation of RNA biosynthetic process	17	18	53	15.61	0.34
biological_process	GO:0030201	heparan sulfate proteoglycan metabolic process	17	19	53	14.79	0.34
biological_process	GO:0030279	negative regulation of ossification	17	19	53	14.79	0.34
molecular_function	GO:0008449	N-acetylglucosamine-6-sulfatase activity	17	19	53	14.79	0.34
biological_process	GO:0016578	histone deubiquitination	17	20	53	14.05	0.34
biological_process	GO:0035860	glial cell-derived neurotrophic factor receptor signaling pathway	17	20	53	14.05	0.34
biological_process	GO:0048247	lymphocyte chemotaxis	17	20	53	14.05	0.34
biological_process	GO:0050927	positive regulation of positive chemotaxis	17	20	53	14.05	0.34
cellular_component	GO:0005657	replication fork	17	20	53	14.05	0.34
molecular_function	GO:0016004	phospholipase activator activity	17	20	53	14.05	0.34
biological_process	GO:0043117	positive regulation of vascular permeability	17	21	53	13.38	0.34
biological_process	GO:0090050	positive regulation of cell migration involved in sprouting angiogenesis	17	21	53	13.38	0.34
biological_process	GO:0048701	embryonic cranial skeleton morphogenesis	17	22	53	12.77	0.34
biological_process	GO:0008045	motor neuron axon guidance	17	23	53	12.22	0.34
biological_process	GO:0048245	eosinophil chemotaxis	17	23	53	12.22	0.34
biological_process	GO:0048246	macrophage chemotaxis	17	23	53	12.22	0.34
biological_process	GO:0021549	cerebellum development	17	24	53	11.71	0.34
molecular_function	GO:0016279	protein-lysine N-methyltransferase activity	17	25	53	11.24	0.34
biological_process	GO:0030718	germ-line stem cell maintenance	17	28	53	10.04	0.34
molecular_function	GO:0004407	histone deacetylase activity	17	28	53	10.04	0.34
biological_process	GO:0007398	ectoderm development	17	29	53	9.69	0.34
biological_process	GO:0034976	response to endoplasmic reticulum stress	17	31	53	9.06	0.34
biological_process	GO:0071354	cellular response to interleukin-6	17	31	53	9.06	0.34
molecular_function	GO:0004065	arylsulfatase activity	17	32	53	8.78	0.34
biological_process	GO:0001701	in utero embryonic development	17	34	53	8.26	0.34
biological_process	GO:0031623	receptor internalization	17	34	53	8.26	0.34
molecular_function	GO:0008234	cysteine-type peptidase activity	17	34	53	8.26	0.34
biological_process	GO:0055074	calcium ion homeostasis	17	37	53	7.59	0.34
biological_process	GO:1900445	positive regulation of filamentous growth of a population of unicellular organisms in response to biotic stimulus	17	38	53	7.39	0.34
cellular_component	GO:0071944	cell periphery	17	38	53	7.39	0.34
molecular_function	GO:0003725	double-stranded RNA binding	17	49	53	5.73	0.34
biological_process	GO:0006370	7-methylguanosine mRNA capping	17	53	53	5.3	0.34
biological_process	GO:0009611	response to wounding	17	54	53	5.2	0.34
biological_process	GO:0051898	negative regulation of protein kinase B signaling cascade	17	56	53	5.02	0.34
biological_process	GO:0006283	transcription-coupled nucleotide-excision repair	17	57	53	4.93	0.34
biological_process	GO:0001516	prostaglandin biosynthetic process	17	62	53	4.53	0.34
biological_process	GO:0006977	DNA damage response, signal transduction by p53 class mediator resulting in cell cycle arrest	17	68	53	4.13	0.34
biological_process	GO:0018108	peptidyl-tyrosine phosphorylation	17	77	53	3.65	0.34
cellular_component	GO:0001726	ruffle	17	79	53	3.56	0.34
biological_process	GO:0060271	cilium morphogenesis	17	91	53	3.09	0.34
biological_process	GO:0007067	mitosis	17	98	53	2.87	0.34
cellular_component	GO:0015629	actin cytoskeleton	18	260	53	1.14	0.34
molecular_function	GO:0004252	serine-type endopeptidase activity	18	333	53	0.89	0.34
biological_process	GO:0031145	anaphase-promoting complex-dependent proteasomal ubiquitin-dependent protein catabolic process	17	103	53	2.73	0.33
cellular_component	GO:0030054	cell junction	17	123	53	2.28	0.33
cellular_component	GO:0005925	focal adhesion	17	142	53	1.98	0.33
biological_process	GO:0007059	chromosome segregation	17	157	53	1.79	0.33
biological_process	GO:0007264	small GTPase mediated signal transduction	17	181	53	1.55	0.33
biological_process	GO:0030510	regulation of BMP signaling pathway	16	16	53	16.53	0.32
biological_process	GO:0036022	limb joint morphogenesis	16	16	53	16.53	0.32
biological_process	GO:0038001	paracrine signaling	16	16	53	16.53	0.32
biological_process	GO:0048703	embryonic viscerocranium morphogenesis	16	16	53	16.53	0.32
biological_process	GO:0060412	ventricular septum morphogenesis	16	16	53	16.53	0.32
biological_process	GO:0065001	specification of axis polarity	16	16	53	16.53	0.32
biological_process	GO:0070168	negative regulation of biomineral tissue development	16	16	53	16.53	0.32
biological_process	GO:0071599	otic vesicle development	16	16	53	16.53	0.32
biological_process	GO:1900086	positive regulation of peptidyl-tyrosine autophosphorylation	16	16	53	16.53	0.32
biological_process	GO:2000020	positive regulation of male gonad development	16	16	53	16.53	0.32
biological_process	GO:2000378	negative regulation of reactive oxygen species metabolic process	16	16	53	16.53	0.32
molecular_function	GO:0004698	calcium-dependent protein kinase C activity	16	16	53	16.53	0.32
molecular_function	GO:0031490	chromatin DNA binding	16	16	53	16.53	0.32
molecular_function	GO:0043183	vascular endothelial growth factor receptor 1 binding	16	16	53	16.53	0.32
molecular_function	GO:0046965	retinoid X receptor binding	16	16	53	16.53	0.32
biological_process	GO:0023052	signaling	16	17	53	15.56	0.32
molecular_function	GO:0070700	BMP receptor binding	16	17	53	15.56	0.32
molecular_function	GO:0070742	C2H2 zinc finger domain binding	16	17	53	15.56	0.32
biological_process	GO:0001958	endochondral ossification	16	18	53	14.69	0.32
biological_process	GO:0010818	T cell chemotaxis	16	18	53	14.69	0.32
biological_process	GO:0048745	smooth muscle tissue development	16	18	53	14.69	0.32
cellular_component	GO:0016514	SWI/SNF complex	16	18	53	14.69	0.32
molecular_function	GO:0035198	miRNA binding	16	18	53	14.69	0.32
molecular_function	GO:0043184	vascular endothelial growth factor receptor 2 binding	16	18	53	14.69	0.32
biological_process	GO:0032331	negative regulation of chondrocyte differentiation	16	19	53	13.92	0.32
biological_process	GO:0035767	endothelial cell chemotaxis	16	19	53	13.92	0.32
biological_process	GO:0060041	retina development in camera-type eye	16	19	53	13.92	0.32
biological_process	GO:0071621	granulocyte chemotaxis	16	19	53	13.92	0.32
cellular_component	GO:0005720	nuclear heterochromatin	16	19	53	13.92	0.32
cellular_component	GO:0016342	catenin complex	16	19	53	13.92	0.32
molecular_function	GO:0070412	R-SMAD binding	16	19	53	13.92	0.32
biological_process	GO:0007530	sex determination	16	20	53	13.22	0.32
biological_process	GO:0036006	cellular response to macrophage colony-stimulating factor stimulus	16	20	53	13.22	0.32
biological_process	GO:0043308	eosinophil degranulation	16	20	53	13.22	0.32
biological_process	GO:0045597	positive regulation of cell differentiation	16	20	53	13.22	0.32
biological_process	GO:0048699	generation of neurons	16	20	53	13.22	0.32
molecular_function	GO:0070324	thyroid hormone binding	16	20	53	13.22	0.32
biological_process	GO:0001569	patterning of blood vessels	16	21	53	12.59	0.32
biological_process	GO:0048844	artery morphogenesis	16	21	53	12.59	0.32
biological_process	GO:0050795	regulation of behavior	16	21	53	12.59	0.32
biological_process	GO:0014808	release of sequestered calcium ion into cytosol by sarcoplasmic reticulum	16	22	53	12.02	0.32
biological_process	GO:0030511	positive regulation of transforming growth factor beta receptor signaling pathway	16	22	53	12.02	0.32
biological_process	GO:0043537	negative regulation of blood vessel endothelial cell migration	16	22	53	12.02	0.32
biological_process	GO:0071363	cellular response to growth factor stimulus	16	22	53	12.02	0.32
biological_process	GO:0007281	germ cell development	16	23	53	11.5	0.32
cellular_component	GO:0031513	nonmotile primary cilium	16	23	53	11.5	0.32
cellular_component	GO:0016591	DNA-directed RNA polymerase II, holoenzyme	16	24	53	11.02	0.32
cellular_component	GO:0035327	transcriptionally active chromatin	16	24	53	11.02	0.32
cellular_component	GO:0032133	chromosome passenger complex	16	25	53	10.58	0.32
biological_process	GO:0006913	nucleocytoplasmic transport	16	30	53	8.82	0.32
molecular_function	GO:0015026	coreceptor activity	16	30	53	8.82	0.32
biological_process	GO:0007492	endoderm development	16	32	53	8.26	0.32
biological_process	GO:0045429	positive regulation of nitric oxide biosynthetic process	16	35	53	7.56	0.32
biological_process	GO:0097190	apoptotic signaling pathway	16	42	53	6.3	0.32
biological_process	GO:0045071	negative regulation of viral genome replication	16	46	53	5.75	0.32
biological_process	GO:0006378	mRNA polyadenylation	16	50	53	5.29	0.32
cellular_component	GO:0005643	nuclear pore	16	55	53	4.81	0.32
cellular_component	GO:0072372	primary cilium	16	55	53	4.81	0.32
molecular_function	GO:0017124	SH3 domain binding	16	60	53	4.41	0.32
biological_process	GO:0001764	neuron migration	16	66	53	4.01	0.32
biological_process	GO:0051259	protein oligomerization	16	69	53	3.83	0.32
biological_process	GO:0042742	defense response to bacterium	16	77	53	3.43	0.32
biological_process	GO:0000216	M/G1 transition of mitotic cell cycle	16	79	53	3.35	0.32
biological_process	GO:0009411	response to UV	16	86	53	3.08	0.32
molecular_function	GO:0004175	endopeptidase activity	16	88	53	3.01	0.32
biological_process	GO:0006464	cellular protein modification process	16	125	53	2.12	0.31
biological_process	GO:0006952	defense response	16	151	53	1.75	0.31
cellular_component	GO:0005802	trans-Golgi network	16	166	53	1.59	0.31
biological_process	GO:0006200	ATP catabolic process	16	240	53	1.1	0.31
biological_process	GO:0001711	endodermal cell fate commitment	15	15	53	16.53	0.3
biological_process	GO:0001738	morphogenesis of a polarized epithelium	15	15	53	16.53	0.3
biological_process	GO:0010452	histone H3-K36 methylation	15	15	53	16.53	0.3
biological_process	GO:0030862	positive regulation of polarized epithelial cell differentiation	15	15	53	16.53	0.3
biological_process	GO:0035844	cloaca development	15	15	53	16.53	0.3
biological_process	GO:0039008	pronephric nephron tubule morphogenesis	15	15	53	16.53	0.3
biological_process	GO:0039023	pronephric duct morphogenesis	15	15	53	16.53	0.3
biological_process	GO:0048646	anatomical structure formation involved in morphogenesis	15	15	53	16.53	0.3
biological_process	GO:0050935	iridophore differentiation	15	15	53	16.53	0.3
biological_process	GO:0060231	mesenchymal to epithelial transition	15	15	53	16.53	0.3
biological_process	GO:0070121	Kupffer's vesicle development	15	15	53	16.53	0.3
biological_process	GO:0072107	positive regulation of ureteric bud formation	15	15	53	16.53	0.3
biological_process	GO:0072178	nephric duct morphogenesis	15	15	53	16.53	0.3
biological_process	GO:2000679	positive regulation of transcription regulatory region DNA binding	15	15	53	16.53	0.3
molecular_function	GO:0000975	regulatory region DNA binding	15	15	53	16.53	0.3
molecular_function	GO:0008116	prostaglandin-I synthase activity	15	15	53	16.53	0.3
biological_process	GO:0010001	glial cell differentiation	15	16	53	15.5	0.3
biological_process	GO:0043615	astrocyte cell migration	15	16	53	15.5	0.3
biological_process	GO:0060065	uterus development	15	16	53	15.5	0.3
biological_process	GO:0060501	positive regulation of epithelial cell proliferation involved in lung morphogenesis	15	16	53	15.5	0.3
biological_process	GO:0071321	cellular response to cGMP	15	16	53	15.5	0.3
molecular_function	GO:0008607	phosphorylase kinase regulator activity	15	16	53	15.5	0.3
molecular_function	GO:0016922	ligand-dependent nuclear receptor binding	15	16	53	15.5	0.3
biological_process	GO:0031953	negative regulation of protein autophosphorylation	15	17	53	14.58	0.3
biological_process	GO:0038091	positive regulation of cell proliferation by VEGF-activated platelet derived growth factor receptor signaling pathway	15	17	53	14.58	0.3
biological_process	GO:0097011	cellular response to granulocyte macrophage colony-stimulating factor stimulus	15	17	53	14.58	0.3
biological_process	GO:0042733	embryonic digit morphogenesis	15	18	53	13.77	0.3
biological_process	GO:0046069	cGMP catabolic process	15	18	53	13.77	0.3
molecular_function	GO:0005172	vascular endothelial growth factor receptor binding	15	18	53	13.77	0.3
biological_process	GO:0019934	cGMP-mediated signaling	15	19	53	13.05	0.3
biological_process	GO:0040010	positive regulation of growth rate	15	19	53	13.05	0.3
biological_process	GO:0001974	blood vessel remodeling	15	20	53	12.4	0.3
biological_process	GO:0045749	negative regulation of S phase of mitotic cell cycle	15	20	53	12.4	0.3
biological_process	GO:0010745	negative regulation of macrophage derived foam cell differentiation	15	21	53	11.81	0.3
biological_process	GO:0019079	viral genome replication	15	21	53	11.81	0.3
biological_process	GO:0019216	regulation of lipid metabolic process	15	21	53	11.81	0.3
biological_process	GO:0035845	photoreceptor cell outer segment organization	15	21	53	11.81	0.3
biological_process	GO:0035855	megakaryocyte development	15	21	53	11.81	0.3
molecular_function	GO:0004112	cyclic-nucleotide phosphodiesterase activity	15	21	53	11.81	0.3
biological_process	GO:0006198	cAMP catabolic process	15	22	53	11.27	0.3
biological_process	GO:0006702	androgen biosynthetic process	15	23	53	10.78	0.3
biological_process	GO:0016573	histone acetylation	15	24	53	10.33	0.3
biological_process	GO:0071333	cellular response to glucose stimulus	15	24	53	10.33	0.3
biological_process	GO:0042326	negative regulation of phosphorylation	15	27	53	9.18	0.3
biological_process	GO:0006352	DNA-dependent transcription, initiation	15	29	53	8.55	0.3
biological_process	GO:0018107	peptidyl-threonine phosphorylation	15	29	53	8.55	0.3
biological_process	GO:0032728	positive regulation of interferon-beta production	15	29	53	8.55	0.3
biological_process	GO:0051149	positive regulation of muscle cell differentiation	15	29	53	8.55	0.3
molecular_function	GO:0030553	cGMP binding	15	29	53	8.55	0.3
biological_process	GO:0045086	positive regulation of interleukin-2 biosynthetic process	15	30	53	8.26	0.3
biological_process	GO:0019217	regulation of fatty acid metabolic process	15	31	53	8	0.3
biological_process	GO:0032480	negative regulation of type I interferon production	15	31	53	8	0.3
biological_process	GO:0050766	positive regulation of phagocytosis	15	31	53	8	0.3
molecular_function	GO:0004118	cGMP-stimulated cyclic-nucleotide phosphodiesterase activity	15	35	53	7.08	0.3
biological_process	GO:0070059	intrinsic apoptotic signaling pathway in response to endoplasmic reticulum stress	15	38	53	6.52	0.3
molecular_function	GO:0019900	kinase binding	15	41	53	6.05	0.3
biological_process	GO:0043627	response to estrogen stimulus	15	42	53	5.9	0.3
biological_process	GO:0030195	negative regulation of blood coagulation	15	43	53	5.77	0.3
biological_process	GO:0046718	viral entry into host cell	15	44	53	5.64	0.3
biological_process	GO:0042060	wound healing	15	51	53	4.86	0.3
biological_process	GO:0051209	release of sequestered calcium ion into cytosol	15	52	53	4.77	0.3
biological_process	GO:0030155	regulation of cell adhesion	15	54	53	4.59	0.3
molecular_function	GO:0042813	Wnt-activated receptor activity	15	57	53	4.35	0.3
biological_process	GO:0048662	negative regulation of smooth muscle cell proliferation	15	60	53	4.13	0.3
biological_process	GO:0006396	RNA processing	15	68	53	3.65	0.3
biological_process	GO:0015031	protein transport	15	88	53	2.82	0.3
biological_process	GO:0016579	protein deubiquitination	15	106	53	2.34	0.3
molecular_function	GO:0030145	manganese ion binding	15	124	53	2	0.29
cellular_component	GO:0030027	lamellipodium	15	134	53	1.85	0.29
molecular_function	GO:0005198	structural molecule activity	15	199	53	1.25	0.29
cellular_component	GO:0005768	endosome	15	240	53	1.03	0.29
biological_process	GO:0002154	thyroid hormone mediated signaling pathway	14	14	53	16.53	0.28
biological_process	GO:0003203	endocardial cushion morphogenesis	14	14	53	16.53	0.28
biological_process	GO:0003337	mesenchymal to epithelial transition involved in metanephros morphogenesis	14	14	53	16.53	0.28
biological_process	GO:0010922	positive regulation of phosphatase activity	14	14	53	16.53	0.28
biological_process	GO:0030423	targeting of mRNA for destruction involved in RNA interference	14	14	53	16.53	0.28
biological_process	GO:0030449	regulation of complement activation	14	14	53	16.53	0.28
biological_process	GO:0072289	metanephric nephron tubule formation	14	14	53	16.53	0.28
biological_process	GO:2000279	negative regulation of DNA biosynthetic process	14	14	53	16.53	0.28
biological_process	GO:0003104	positive regulation of glomerular filtration	14	15	53	15.43	0.28
biological_process	GO:0032925	regulation of activin receptor signaling pathway	14	15	53	15.43	0.28
biological_process	GO:0051145	smooth muscle cell differentiation	14	15	53	15.43	0.28
biological_process	GO:0051571	positive regulation of histone H3-K4 methylation	14	15	53	15.43	0.28
biological_process	GO:0060037	pharyngeal system development	14	15	53	15.43	0.28
biological_process	GO:2000669	negative regulation of dendritic cell apoptotic process	14	15	53	15.43	0.28
molecular_function	GO:0042809	vitamin D receptor binding	14	15	53	15.43	0.28
biological_process	GO:0002089	lens morphogenesis in camera-type eye	14	16	53	14.46	0.28
biological_process	GO:2000134	negative regulation of G1/S transition of mitotic cell cycle	14	16	53	14.46	0.28
molecular_function	GO:0000979	RNA polymerase II core promoter sequence-specific DNA binding	14	16	53	14.46	0.28
biological_process	GO:0009410	response to xenobiotic stimulus	14	17	53	13.61	0.28
biological_process	GO:0010875	positive regulation of cholesterol efflux	14	17	53	13.61	0.28
biological_process	GO:0030325	adrenal gland development	14	17	53	13.61	0.28
biological_process	GO:0030539	male genitalia development	14	17	53	13.61	0.28
biological_process	GO:0032481	positive regulation of type I interferon production	14	17	53	13.61	0.28
biological_process	GO:0035115	embryonic forelimb morphogenesis	14	17	53	13.61	0.28
biological_process	GO:0045869	negative regulation of retroviral genome replication	14	17	53	13.61	0.28
biological_process	GO:0071636	positive regulation of transforming growth factor beta production	14	17	53	13.61	0.28
biological_process	GO:0097067	cellular response to thyroid hormone stimulus	14	17	53	13.61	0.28
biological_process	GO:0071383	cellular response to steroid hormone stimulus	14	18	53	12.86	0.28
biological_process	GO:0016571	histone methylation	14	19	53	12.18	0.28
biological_process	GO:0042177	negative regulation of protein catabolic process	14	19	53	12.18	0.28
biological_process	GO:0035522	monoubiquitinated histone H2A deubiquitination	14	20	53	11.57	0.28
cellular_component	GO:0005669	transcription factor TFIID complex	14	20	53	11.57	0.28
cellular_component	GO:0035517	PR-DUB complex	14	20	53	11.57	0.28
biological_process	GO:0014003	oligodendrocyte development	14	21	53	11.02	0.28
biological_process	GO:0022408	negative regulation of cell-cell adhesion	14	21	53	11.02	0.28
biological_process	GO:0055062	phosphate ion homeostasis	14	21	53	11.02	0.28
biological_process	GO:0008589	regulation of smoothened signaling pathway	14	22	53	10.52	0.28
molecular_function	GO:0005104	fibroblast growth factor receptor binding	14	22	53	10.52	0.28
molecular_function	GO:0044548	S100 protein binding	14	23	53	10.06	0.28
biological_process	GO:0001756	somitogenesis	14	24	53	9.64	0.28
biological_process	GO:0003091	renal water homeostasis	14	25	53	9.26	0.28
biological_process	GO:0051281	positive regulation of release of sequestered calcium ion into cytosol	14	25	53	9.26	0.28
biological_process	GO:0008156	negative regulation of DNA replication	14	28	53	8.26	0.28
biological_process	GO:0033619	membrane protein proteolysis	14	29	53	7.98	0.28
biological_process	GO:0034504	protein localization to nucleus	14	29	53	7.98	0.28
biological_process	GO:0042130	negative regulation of T cell proliferation	14	30	53	7.71	0.28
biological_process	GO:0032091	negative regulation of protein binding	14	33	53	7.01	0.28
biological_process	GO:0040014	regulation of multicellular organism growth	14	35	53	6.61	0.28
biological_process	GO:0070555	response to interleukin-1	14	35	53	6.61	0.28
biological_process	GO:0050853	B cell receptor signaling pathway	14	36	53	6.43	0.28
biological_process	GO:0031571	mitotic cell cycle G1/S transition DNA damage checkpoint	14	38	53	6.09	0.28
cellular_component	GO:0009925	basal plasma membrane	14	38	53	6.09	0.28
biological_process	GO:0001843	neural tube closure	14	44	53	5.26	0.28
biological_process	GO:0006536	glutamate metabolic process	14	50	53	4.63	0.28
biological_process	GO:0006284	base-excision repair	14	51	53	4.54	0.28
molecular_function	GO:0002020	protease binding	14	54	53	4.29	0.28
biological_process	GO:0051496	positive regulation of stress fiber assembly	14	58	53	3.99	0.28
biological_process	GO:0036178	filamentous growth of a population of unicellular organisms in response to neutral pH	14	60	53	3.86	0.28
cellular_component	GO:0019005	SCF ubiquitin ligase complex	14	63	53	3.67	0.28
biological_process	GO:0045216	cell-cell junction organization	14	74	53	3.13	0.28
biological_process	GO:0051439	regulation of ubiquitin-protein ligase activity involved in mitotic cell cycle	14	75	53	3.09	0.28
biological_process	GO:0070936	protein K48-linked ubiquitination	14	81	53	2.86	0.28
cellular_component	GO:0045202	synapse	14	92	53	2.52	0.28
biological_process	GO:0006897	endocytosis	14	100	53	2.31	0.28
molecular_function	GO:0004713	protein tyrosine kinase activity	14	101	53	2.29	0.28
biological_process	GO:0006112	energy reserve metabolic process	14	108	53	2.14	0.28
biological_process	GO:0007204	elevation of cytosolic calcium ion concentration	14	112	53	2.07	0.28
biological_process	GO:0031295	T cell costimulation	14	125	53	1.85	0.27
biological_process	GO:0042787	protein ubiquitination involved in ubiquitin-dependent protein catabolic process	14	133	53	1.74	0.27
cellular_component	GO:0005777	peroxisome	14	144	53	1.61	0.27
biological_process	GO:0050776	regulation of immune response	14	264	53	0.88	0.27
biological_process	GO:0035137	hindlimb morphogenesis	13	13	53	16.53	0.26
biological_process	GO:0045948	positive regulation of translational initiation	13	13	53	16.53	0.26
biological_process	GO:0070935	3'-UTR-mediated mRNA stabilization	13	13	53	16.53	0.26
biological_process	GO:0071657	positive regulation of granulocyte colony-stimulating factor production	13	13	53	16.53	0.26
biological_process	GO:0072017	distal tubule development	13	13	53	16.53	0.26
biological_process	GO:0097150	neuronal stem cell maintenance	13	13	53	16.53	0.26
biological_process	GO:0097275	cellular ammonia homeostasis	13	13	53	16.53	0.26
biological_process	GO:0097276	cellular creatinine homeostasis	13	13	53	16.53	0.26
biological_process	GO:0097277	cellular urea homeostasis	13	13	53	16.53	0.26
biological_process	GO:1900041	negative regulation of interleukin-2 secretion	13	13	53	16.53	0.26
biological_process	GO:1900461	positive regulation of pseudohyphal growth by positive regulation of transcription from RNA polymerase II promoter	13	13	53	16.53	0.26
biological_process	GO:2000220	regulation of pseudohyphal growth	13	13	53	16.53	0.26
molecular_function	GO:0008494	translation activator activity	13	13	53	16.53	0.26
biological_process	GO:0010960	magnesium ion homeostasis	13	14	53	15.35	0.26
biological_process	GO:0030879	mammary gland development	13	14	53	15.35	0.26
biological_process	GO:0034115	negative regulation of heterotypic cell-cell adhesion	13	14	53	15.35	0.26
biological_process	GO:0045542	positive regulation of cholesterol biosynthetic process	13	14	53	15.35	0.26
biological_process	GO:0060765	regulation of androgen receptor signaling pathway	13	14	53	15.35	0.26
biological_process	GO:0072044	collecting duct development	13	14	53	15.35	0.26
biological_process	GO:0090280	positive regulation of calcium ion import	13	14	53	15.35	0.26
cellular_component	GO:0005719	nuclear euchromatin	13	14	53	15.35	0.26
molecular_function	GO:0035257	nuclear hormone receptor binding	13	14	53	15.35	0.26
biological_process	GO:0007183	SMAD protein complex assembly	13	15	53	14.33	0.26
biological_process	GO:0035759	mesangial cell-matrix adhesion	13	15	53	14.33	0.26
biological_process	GO:0042482	positive regulation of odontogenesis	13	15	53	14.33	0.26
biological_process	GO:0042701	progesterone secretion	13	15	53	14.33	0.26
biological_process	GO:0055075	potassium ion homeostasis	13	15	53	14.33	0.26
biological_process	GO:0060059	embryonic retina morphogenesis in camera-type eye	13	15	53	14.33	0.26
molecular_function	GO:0005114	type II transforming growth factor beta receptor binding	13	15	53	14.33	0.26
molecular_function	GO:0019211	phosphatase activator activity	13	15	53	14.33	0.26
biological_process	GO:0048839	inner ear development	13	16	53	13.43	0.26
biological_process	GO:2001214	positive regulation of vasculogenesis	13	16	53	13.43	0.26
cellular_component	GO:0016442	RNA-induced silencing complex	13	16	53	13.43	0.26
biological_process	GO:0019953	sexual reproduction	13	17	53	12.64	0.26
biological_process	GO:0048536	spleen development	13	17	53	12.64	0.26
molecular_function	GO:0017070	U6 snRNA binding	13	18	53	11.94	0.26
biological_process	GO:0002230	positive regulation of defense response to virus by host	13	19	53	11.31	0.26
biological_process	GO:0003094	glomerular filtration	13	19	53	11.31	0.26
biological_process	GO:0031638	zymogen activation	13	19	53	11.31	0.26
biological_process	GO:0045721	negative regulation of gluconeogenesis	13	19	53	11.31	0.26
molecular_function	GO:0050431	transforming growth factor beta binding	13	19	53	11.31	0.26
molecular_function	GO:0031996	thioesterase binding	13	20	53	10.74	0.26
biological_process	GO:0048704	embryonic skeletal system morphogenesis	13	21	53	10.23	0.26
biological_process	GO:0097070	ductus arteriosus closure	13	21	53	10.23	0.26
biological_process	GO:0010165	response to X-ray	13	23	53	9.34	0.26
cellular_component	GO:0005675	holo TFIIH complex	13	23	53	9.34	0.26
biological_process	GO:0008542	visual learning	13	24	53	8.95	0.26
biological_process	GO:0055078	sodium ion homeostasis	13	24	53	8.95	0.26
biological_process	GO:0060429	epithelium development	13	24	53	8.95	0.26
cellular_component	GO:0035097	histone methyltransferase complex	13	24	53	8.95	0.26
biological_process	GO:0045732	positive regulation of protein catabolic process	13	28	53	7.67	0.26
biological_process	GO:0090398	cellular senescence	13	28	53	7.67	0.26
molecular_function	GO:0042288	MHC class I protein binding	13	28	53	7.67	0.26
biological_process	GO:0007257	activation of JUN kinase activity	13	31	53	6.93	0.26
molecular_function	GO:0003727	single-stranded RNA binding	13	31	53	6.93	0.26
biological_process	GO:0001654	eye development	13	32	53	6.72	0.26
biological_process	GO:0010800	positive regulation of peptidyl-threonine phosphorylation	13	32	53	6.72	0.26
cellular_component	GO:0005845	mRNA cap binding complex	13	33	53	6.51	0.26
biological_process	GO:0030819	positive regulation of cAMP biosynthetic process	13	34	53	6.32	0.26
biological_process	GO:0055010	ventricular cardiac muscle tissue morphogenesis	13	34	53	6.32	0.26
cellular_component	GO:0005881	cytoplasmic microtubule	13	36	53	5.97	0.26
biological_process	GO:0006959	humoral immune response	13	39	53	5.51	0.26
biological_process	GO:0043967	histone H4 acetylation	13	39	53	5.51	0.26
cellular_component	GO:0000775	chromosome, centromeric region	13	40	53	5.37	0.26
biological_process	GO:0034612	response to tumor necrosis factor	13	42	53	5.12	0.26
biological_process	GO:0070830	tight junction assembly	13	42	53	5.12	0.26
biological_process	GO:0007569	cell aging	13	45	53	4.78	0.26
biological_process	GO:0010976	positive regulation of neuron projection development	13	49	53	4.39	0.26
biological_process	GO:0036244	cellular response to neutral pH	13	49	53	4.39	0.26
biological_process	GO:0050714	positive regulation of protein secretion	13	53	53	4.05	0.26
cellular_component	GO:0032587	ruffle membrane	13	53	53	4.05	0.26
cellular_component	GO:0071339	MLL1 complex	13	55	53	3.91	0.26
biological_process	GO:0072593	reactive oxygen species metabolic process	13	56	53	3.84	0.26
biological_process	GO:0007224	smoothened signaling pathway	13	61	53	3.52	0.26
cellular_component	GO:0045211	postsynaptic membrane	13	70	53	3.07	0.26
biological_process	GO:0051437	positive regulation of ubiquitin-protein ligase activity involved in mitotic cell cycle	13	71	53	3.03	0.26
biological_process	GO:0031572	G2/M transition DNA damage checkpoint	13	72	53	2.98	0.26
biological_process	GO:0010212	response to ionizing radiation	13	90	53	2.39	0.26
cellular_component	GO:0005856	cytoskeleton	13	96	53	2.24	0.26
biological_process	GO:0000724	double-strand break repair via homologous recombination	13	99	53	2.17	0.26
biological_process	GO:0050900	leukocyte migration	13	104	53	2.07	0.26
biological_process	GO:0060337	type I interferon-mediated signaling pathway	13	113	53	1.9	0.26
molecular_function	GO:0008565	protein transporter activity	13	113	53	1.9	0.26
cellular_component	GO:0031410	cytoplasmic vesicle	13	132	53	1.63	0.25
biological_process	GO:0000910	cytokinesis	13	149	53	1.44	0.25
molecular_function	GO:0005525	GTP binding	13	194	53	1.11	0.25
biological_process	GO:0001705	ectoderm formation	12	12	53	16.53	0.24
biological_process	GO:0003179	heart valve morphogenesis	12	12	53	16.53	0.24
biological_process	GO:0006349	regulation of gene expression by genetic imprinting	12	12	53	16.53	0.24
biological_process	GO:0010944	negative regulation of transcription by competitive promoter binding	12	12	53	16.53	0.24
biological_process	GO:0030422	production of siRNA involved in RNA interference	12	12	53	16.53	0.24
biological_process	GO:0035066	positive regulation of histone acetylation	12	12	53	16.53	0.24
biological_process	GO:0060681	branch elongation involved in ureteric bud branching	12	12	53	16.53	0.24
biological_process	GO:0071971	extracellular vesicular exosome assembly	12	12	53	16.53	0.24
biological_process	GO:0072163	mesonephric epithelium development	12	12	53	16.53	0.24
biological_process	GO:2000117	negative regulation of cysteine-type endopeptidase activity	12	12	53	16.53	0.24
cellular_component	GO:0043509	activin A complex	12	12	53	16.53	0.24
molecular_function	GO:0001158	enhancer sequence-specific DNA binding	12	12	53	16.53	0.24
molecular_function	GO:0043035	chromatin insulator sequence binding	12	12	53	16.53	0.24
biological_process	GO:0030853	negative regulation of granulocyte differentiation	12	13	53	15.26	0.24
biological_process	GO:0032570	response to progesterone stimulus	12	13	53	15.26	0.24
biological_process	GO:0042693	muscle cell fate commitment	12	13	53	15.26	0.24
biological_process	GO:0046880	regulation of follicle-stimulating hormone secretion	12	13	53	15.26	0.24
cellular_component	GO:0001652	granular component	12	13	53	15.26	0.24
cellular_component	GO:0043512	inhibin A complex	12	13	53	15.26	0.24
biological_process	GO:0016570	histone modification	12	14	53	14.17	0.24
biological_process	GO:0048384	retinoic acid receptor signaling pathway	12	14	53	14.17	0.24
biological_process	GO:0060539	diaphragm development	12	14	53	14.17	0.24
biological_process	GO:1900035	negative regulation of cellular response to heat	12	14	53	14.17	0.24
biological_process	GO:1900038	negative regulation of cellular response to hypoxia	12	14	53	14.17	0.24
cellular_component	GO:0036053	glomerular endothelium fenestra	12	14	53	14.17	0.24
biological_process	GO:0001709	cell fate determination	12	15	53	13.22	0.24
biological_process	GO:0014912	negative regulation of smooth muscle cell migration	12	15	53	13.22	0.24
biological_process	GO:0048663	neuron fate commitment	12	15	53	13.22	0.24
biological_process	GO:0060349	bone morphogenesis	12	15	53	13.22	0.24
biological_process	GO:0060391	positive regulation of SMAD protein import into nucleus	12	15	53	13.22	0.24
biological_process	GO:0000085	G2 phase of mitotic cell cycle	12	16	53	12.4	0.24
biological_process	GO:0016199	axon midline choice point recognition	12	16	53	12.4	0.24
biological_process	GO:0042074	cell migration involved in gastrulation	12	16	53	12.4	0.24
biological_process	GO:0051926	negative regulation of calcium ion transport	12	16	53	12.4	0.24
cellular_component	GO:0033391	chromatoid body	12	16	53	12.4	0.24
biological_process	GO:0032735	positive regulation of interleukin-12 production	12	17	53	11.67	0.24
biological_process	GO:0045664	regulation of neuron differentiation	12	18	53	11.02	0.24
biological_process	GO:0032740	positive regulation of interleukin-17 production	12	19	53	10.44	0.24
cellular_component	GO:0045171	intercellular bridge	12	19	53	10.44	0.24
biological_process	GO:0000578	embryonic axis specification	12	20	53	9.92	0.24
biological_process	GO:0042113	B cell activation	12	20	53	9.92	0.24
biological_process	GO:0050910	detection of mechanical stimulus involved in sensory perception of sound	12	20	53	9.92	0.24
biological_process	GO:0042541	hemoglobin biosynthetic process	12	21	53	9.45	0.24
molecular_function	GO:0042609	CD4 receptor binding	12	21	53	9.45	0.24
biological_process	GO:0032926	negative regulation of activin receptor signaling pathway	12	22	53	9.02	0.24
biological_process	GO:0051493	regulation of cytoskeleton organization	12	23	53	8.62	0.24
biological_process	GO:0035019	somatic stem cell maintenance	12	24	53	8.26	0.24
biological_process	GO:0006402	mRNA catabolic process	12	25	53	7.93	0.24
biological_process	GO:0070373	negative regulation of ERK1 and ERK2 cascade	12	25	53	7.93	0.24
biological_process	GO:0050769	positive regulation of neurogenesis	12	27	53	7.35	0.24
cellular_component	GO:0000777	condensed chromosome kinetochore	12	27	53	7.35	0.24
molecular_function	GO:0048365	Rac GTPase binding	12	27	53	7.35	0.24
biological_process	GO:0042692	muscle cell differentiation	12	28	53	7.08	0.24
biological_process	GO:0043129	surfactant homeostasis	12	28	53	7.08	0.24
biological_process	GO:0046329	negative regulation of JNK cascade	12	28	53	7.08	0.24
molecular_function	GO:0051117	ATPase binding	12	30	53	6.61	0.24
biological_process	GO:0043388	positive regulation of DNA binding	12	31	53	6.4	0.24
biological_process	GO:0007026	negative regulation of microtubule depolymerization	12	32	53	6.2	0.24
biological_process	GO:0009798	axis specification	12	32	53	6.2	0.24
biological_process	GO:0032320	positive regulation of Ras GTPase activity	12	38	53	5.22	0.24
biological_process	GO:0042104	positive regulation of activated T cell proliferation	12	39	53	5.09	0.24
biological_process	GO:0009725	response to hormone stimulus	12	40	53	4.96	0.24
biological_process	GO:0042110	T cell activation	12	41	53	4.84	0.24
biological_process	GO:0000079	regulation of cyclin-dependent protein kinase activity	12	44	53	4.51	0.24
molecular_function	GO:0045296	cadherin binding	12	48	53	4.13	0.24
molecular_function	GO:0005245	voltage-gated calcium channel activity	12	59	53	3.36	0.24
cellular_component	GO:0016023	cytoplasmic membrane-bounded vesicle	12	62	53	3.2	0.24
biological_process	GO:0042632	cholesterol homeostasis	12	63	53	3.15	0.24
molecular_function	GO:0004177	aminopeptidase activity	12	63	53	3.15	0.24
molecular_function	GO:0008236	serine-type peptidase activity	12	70	53	2.83	0.24
cellular_component	GO:0001725	stress fiber	12	72	53	2.75	0.24
molecular_function	GO:0015631	tubulin binding	12	72	53	2.75	0.24
biological_process	GO:0008544	epidermis development	12	78	53	2.54	0.24
cellular_component	GO:0030426	growth cone	12	88	53	2.25	0.24
cellular_component	GO:0043005	neuron projection	12	89	53	2.23	0.24
biological_process	GO:0046677	response to antibiotic	12	108	53	1.84	0.24
biological_process	GO:0030036	actin cytoskeleton organization	12	130	53	1.53	0.23
biological_process	GO:0001315	age-dependent response to reactive oxygen species	11	11	53	16.53	0.22
biological_process	GO:0001678	cellular glucose homeostasis	11	11	53	16.53	0.22
biological_process	GO:0002764	immune response-regulating signaling pathway	11	11	53	16.53	0.22
biological_process	GO:0003136	negative regulation of heart induction by canonical Wnt receptor signaling pathway	11	11	53	16.53	0.22
biological_process	GO:0003215	cardiac right ventricle morphogenesis	11	11	53	16.53	0.22
biological_process	GO:0010813	neuropeptide catabolic process	11	11	53	16.53	0.22
biological_process	GO:0010829	negative regulation of glucose transport	11	11	53	16.53	0.22
biological_process	GO:0031065	positive regulation of histone deacetylation	11	11	53	16.53	0.22
biological_process	GO:0034769	basement membrane disassembly	11	11	53	16.53	0.22
biological_process	GO:0035993	deltoid tuberosity development	11	11	53	16.53	0.22
biological_process	GO:0048024	regulation of mRNA splicing, via spliceosome	11	11	53	16.53	0.22
biological_process	GO:0048642	negative regulation of skeletal muscle tissue development	11	11	53	16.53	0.22
biological_process	GO:0060026	convergent extension	11	11	53	16.53	0.22
biological_process	GO:0060448	dichotomous subdivision of terminal units involved in lung branching	11	11	53	16.53	0.22
biological_process	GO:0060678	dichotomous subdivision of terminal units involved in ureteric bud branching	11	11	53	16.53	0.22
biological_process	GO:0071639	positive regulation of monocyte chemotactic protein-1 production	11	11	53	16.53	0.22
biological_process	GO:0097066	response to thyroid hormone stimulus	11	11	53	16.53	0.22
biological_process	GO:0097195	pilomotor reflex	11	11	53	16.53	0.22
biological_process	GO:2000774	positive regulation of cellular senescence	11	11	53	16.53	0.22
cellular_component	GO:0008385	IkappaB kinase complex	11	11	53	16.53	0.22
molecular_function	GO:0030108	HLA-A specific activating MHC class I receptor activity	11	11	53	16.53	0.22
molecular_function	GO:0035497	cAMP response element binding	11	11	53	16.53	0.22
molecular_function	GO:0043028	cysteine-type endopeptidase regulator activity involved in apoptotic process	11	11	53	16.53	0.22
biological_process	GO:0003281	ventricular septum development	11	12	53	15.15	0.22
biological_process	GO:0014002	astrocyte development	11	12	53	15.15	0.22
biological_process	GO:0030719	P granule organization	11	12	53	15.15	0.22
biological_process	GO:0043569	negative regulation of insulin-like growth factor receptor signaling pathway	11	12	53	15.15	0.22
biological_process	GO:0055007	cardiac muscle cell differentiation	11	12	53	15.15	0.22
biological_process	GO:0061205	paramesonephric duct development	11	12	53	15.15	0.22
biological_process	GO:2000347	positive regulation of hepatocyte proliferation	11	12	53	15.15	0.22
biological_process	GO:2000360	negative regulation of binding of sperm to zona pellucida	11	12	53	15.15	0.22
biological_process	GO:0001913	T cell mediated cytotoxicity	11	13	53	13.99	0.22
biological_process	GO:0010739	positive regulation of protein kinase A signaling cascade	11	13	53	13.99	0.22
biological_process	GO:0097084	vascular smooth muscle cell development	11	13	53	13.99	0.22
molecular_function	GO:0030284	estrogen receptor activity	11	13	53	13.99	0.22
molecular_function	GO:0044020	histone methyltransferase activity (H4-R3 specific)	11	13	53	13.99	0.22
biological_process	GO:0001659	temperature homeostasis	11	14	53	12.99	0.22
biological_process	GO:0003148	outflow tract septum morphogenesis	11	14	53	12.99	0.22
biological_process	GO:0046827	positive regulation of protein export from nucleus	11	14	53	12.99	0.22
biological_process	GO:0048589	developmental growth	11	14	53	12.99	0.22
cellular_component	GO:0016281	eukaryotic translation initiation factor 4F complex	11	14	53	12.99	0.22
biological_process	GO:0009954	proximal/distal pattern formation	11	15	53	12.12	0.22
biological_process	GO:0033523	histone H2B ubiquitination	11	15	53	12.12	0.22
biological_process	GO:0043029	T cell homeostasis	11	15	53	12.12	0.22
biological_process	GO:0050873	brown fat cell differentiation	11	15	53	12.12	0.22
biological_process	GO:0060325	face morphogenesis	11	15	53	12.12	0.22
biological_process	GO:0060541	respiratory system development	11	15	53	12.12	0.22
molecular_function	GO:0016015	morphogen activity	11	15	53	12.12	0.22
molecular_function	GO:0016505	apoptotic protease activator activity	11	15	53	12.12	0.22
biological_process	GO:0010815	bradykinin catabolic process	11	16	53	11.36	0.22
biological_process	GO:0014033	neural crest cell differentiation	11	16	53	11.36	0.22
cellular_component	GO:0005844	polysome	11	16	53	11.36	0.22
biological_process	GO:0045663	positive regulation of myoblast differentiation	11	17	53	10.7	0.22
biological_process	GO:0045777	positive regulation of blood pressure	11	17	53	10.7	0.22
biological_process	GO:0045089	positive regulation of innate immune response	11	19	53	9.57	0.22
biological_process	GO:0045776	negative regulation of blood pressure	11	19	53	9.57	0.22
biological_process	GO:0010952	positive regulation of peptidase activity	11	20	53	9.09	0.22
biological_process	GO:0050848	regulation of calcium-mediated signaling	11	20	53	9.09	0.22
biological_process	GO:0051000	positive regulation of nitric-oxide synthase activity	11	21	53	8.66	0.22
biological_process	GO:0060322	head development	11	21	53	8.66	0.22
biological_process	GO:0071732	cellular response to nitric oxide	11	21	53	8.66	0.22
cellular_component	GO:0000793	condensed chromosome	11	21	53	8.66	0.22
cellular_component	GO:0030057	desmosome	11	21	53	8.66	0.22
cellular_component	GO:0035145	exon-exon junction complex	11	21	53	8.66	0.22
biological_process	GO:0031575	mitotic cell cycle G1/S transition checkpoint	11	24	53	7.58	0.22
biological_process	GO:0048863	stem cell differentiation	11	24	53	7.58	0.22
cellular_component	GO:0097208	alveolar lamellar body	11	25	53	7.27	0.22
molecular_function	GO:0005154	epidermal growth factor receptor binding	11	25	53	7.27	0.22
molecular_function	GO:0015269	calcium-activated potassium channel activity	11	25	53	7.27	0.22
biological_process	GO:0008354	germ cell migration	11	26	53	6.99	0.22
biological_process	GO:0010259	multicellular organismal aging	11	26	53	6.99	0.22
biological_process	GO:0006909	phagocytosis	11	27	53	6.73	0.22
biological_process	GO:0043277	apoptotic cell clearance	11	27	53	6.73	0.22
molecular_function	GO:0008093	cytoskeletal adaptor activity	11	27	53	6.73	0.22
biological_process	GO:0032835	glomerulus development	11	29	53	6.27	0.22
biological_process	GO:0042100	B cell proliferation	11	29	53	6.27	0.22
biological_process	GO:0045088	regulation of innate immune response	11	29	53	6.27	0.22
biological_process	GO:0070301	cellular response to hydrogen peroxide	11	29	53	6.27	0.22
molecular_function	GO:0030296	protein tyrosine kinase activator activity	11	29	53	6.27	0.22
biological_process	GO:0060397	JAK-STAT cascade involved in growth hormone signaling pathway	11	31	53	5.87	0.22
biological_process	GO:2000379	positive regulation of reactive oxygen species metabolic process	11	32	53	5.68	0.22
biological_process	GO:0036171	filamentous growth of a population of unicellular organisms in response to chemical stimulus	11	36	53	5.05	0.22
cellular_component	GO:0005913	cell-cell adherens junction	11	36	53	5.05	0.22
biological_process	GO:0009409	response to cold	11	37	53	4.91	0.22
biological_process	GO:0060326	cell chemotaxis	11	37	53	4.91	0.22
cellular_component	GO:0042734	presynaptic membrane	11	39	53	4.66	0.22
molecular_function	GO:0003680	AT DNA binding	11	40	53	4.55	0.22
biological_process	GO:0051225	spindle assembly	11	42	53	4.33	0.22
biological_process	GO:0008219	cell death	11	45	53	4.04	0.22
biological_process	GO:0006635	fatty acid beta-oxidation	11	51	53	3.57	0.22
cellular_component	GO:0031519	PcG protein complex	11	52	53	3.5	0.22
biological_process	GO:0000288	nuclear-transcribed mRNA catabolic process, deadenylation-dependent decay	11	54	53	3.37	0.22
biological_process	GO:0071805	potassium ion transmembrane transport	11	55	53	3.31	0.22
molecular_function	GO:0030674	protein binding, bridging	11	58	53	3.13	0.22
cellular_component	GO:0005840	ribosome	11	69	53	2.64	0.22
biological_process	GO:0006310	DNA recombination	11	70	53	2.6	0.22
cellular_component	GO:0031594	neuromuscular junction	11	73	53	2.49	0.22
biological_process	GO:0010923	negative regulation of phosphatase activity	11	78	53	2.33	0.22
molecular_function	GO:0004784	superoxide dismutase activity	11	80	53	2.27	0.22
biological_process	GO:0043085	positive regulation of catalytic activity	11	87	53	2.09	0.22
biological_process	GO:0006415	translational termination	11	89	53	2.04	0.22
molecular_function	GO:0001664	G-protein coupled receptor binding	11	104	53	1.75	0.22
biological_process	GO:0016311	dephosphorylation	11	131	53	1.39	0.22
biological_process	GO:0006414	translational elongation	11	154	53	1.18	0.21
biological_process	GO:0006805	xenobiotic metabolic process	11	168	53	1.08	0.21
biological_process	GO:0006644	phospholipid metabolic process	11	231	53	0.79	0.21
biological_process	GO:0006470	protein dephosphorylation	11	258	53	0.7	0.21
biological_process	GO:0005975	carbohydrate metabolic process	11	359	53	0.51	0.21
biological_process	GO:0000183	chromatin silencing at rDNA	10	10	53	16.53	0.2
biological_process	GO:0003211	cardiac ventricle formation	10	10	53	16.53	0.2
biological_process	GO:0006450	regulation of translational fidelity	10	10	53	16.53	0.2
biological_process	GO:0021937	cerebellar Purkinje cell-granule cell precursor cell signaling involved in regulation of granule cell precursor cell proliferation	10	10	53	16.53	0.2
biological_process	GO:0030916	otic vesicle formation	10	10	53	16.53	0.2
biological_process	GO:0031442	positive regulation of mRNA 3'-end processing	10	10	53	16.53	0.2
biological_process	GO:0035986	senescence-associated heterochromatin focus assembly	10	10	53	16.53	0.2
biological_process	GO:0035990	tendon cell differentiation	10	10	53	16.53	0.2
biological_process	GO:0042993	positive regulation of transcription factor import into nucleus	10	10	53	16.53	0.2
biological_process	GO:0045720	negative regulation of integrin biosynthetic process	10	10	53	16.53	0.2
biological_process	GO:0045747	positive regulation of Notch signaling pathway	10	10	53	16.53	0.2
biological_process	GO:0045900	negative regulation of translational elongation	10	10	53	16.53	0.2
biological_process	GO:0048608	reproductive structure development	10	10	53	16.53	0.2
biological_process	GO:0050711	negative regulation of interleukin-1 secretion	10	10	53	16.53	0.2
biological_process	GO:0060442	branching involved in prostate gland morphogenesis	10	10	53	16.53	0.2
biological_process	GO:0060664	epithelial cell proliferation involved in salivary gland morphogenesis	10	10	53	16.53	0.2
biological_process	GO:0061031	endodermal digestive tract morphogenesis	10	10	53	16.53	0.2
biological_process	GO:0072049	comma-shaped body morphogenesis	10	10	53	16.53	0.2
biological_process	GO:0072050	S-shaped body morphogenesis	10	10	53	16.53	0.2
biological_process	GO:0072077	renal vesicle morphogenesis	10	10	53	16.53	0.2
biological_process	GO:1900165	negative regulation of interleukin-6 secretion	10	10	53	16.53	0.2
biological_process	GO:2000178	negative regulation of neural precursor cell proliferation	10	10	53	16.53	0.2
biological_process	GO:2000270	negative regulation of fibroblast apoptotic process	10	10	53	16.53	0.2
biological_process	GO:2000481	positive regulation of cAMP-dependent protein kinase activity	10	10	53	16.53	0.2
biological_process	GO:2000744	positive regulation of anterior head development	10	10	53	16.53	0.2
cellular_component	GO:0035985	senescence-associated heterochromatin focus	10	10	53	16.53	0.2
molecular_function	GO:0000980	RNA polymerase II distal enhancer sequence-specific DNA binding	10	10	53	16.53	0.2
molecular_function	GO:0000982	RNA polymerase II core promoter proximal region sequence-specific DNA binding transcription factor activity	10	10	53	16.53	0.2
molecular_function	GO:0035326	enhancer binding	10	10	53	16.53	0.2
molecular_function	GO:0042974	retinoic acid receptor binding	10	10	53	16.53	0.2
molecular_function	GO:0051575	5'-deoxyribose-5-phosphate lyase activity	10	10	53	16.53	0.2
molecular_function	GO:0070411	I-SMAD binding	10	10	53	16.53	0.2
biological_process	GO:0006473	protein acetylation	10	11	53	15.03	0.2
biological_process	GO:0007431	salivary gland development	10	11	53	15.03	0.2
biological_process	GO:0010906	regulation of glucose metabolic process	10	11	53	15.03	0.2
biological_process	GO:0018023	peptidyl-lysine trimethylation	10	11	53	15.03	0.2
biological_process	GO:0021527	spinal cord association neuron differentiation	10	11	53	15.03	0.2
biological_process	GO:0030517	negative regulation of axon extension	10	11	53	15.03	0.2
biological_process	GO:0031016	pancreas development	10	11	53	15.03	0.2
biological_process	GO:0032801	receptor catabolic process	10	11	53	15.03	0.2
biological_process	GO:0043049	otic placode formation	10	11	53	15.03	0.2
biological_process	GO:0048665	neuron fate specification	10	11	53	15.03	0.2
biological_process	GO:0070933	histone H4 deacetylation	10	11	53	15.03	0.2
biological_process	GO:0071681	cellular response to indole-3-methanol	10	11	53	15.03	0.2
biological_process	GO:2000467	positive regulation of glycogen (starch) synthase activity	10	11	53	15.03	0.2
biological_process	GO:2000727	positive regulation of cardiac muscle cell differentiation	10	11	53	15.03	0.2
molecular_function	GO:0048185	activin binding	10	11	53	15.03	0.2
biological_process	GO:0002687	positive regulation of leukocyte migration	10	12	53	13.77	0.2
biological_process	GO:0002922	positive regulation of humoral immune response	10	12	53	13.77	0.2
biological_process	GO:0010763	positive regulation of fibroblast migration	10	12	53	13.77	0.2
biological_process	GO:0010940	positive regulation of necrotic cell death	10	12	53	13.77	0.2
biological_process	GO:0021871	forebrain regionalization	10	12	53	13.77	0.2
biological_process	GO:0045650	negative regulation of macrophage differentiation	10	12	53	13.77	0.2
biological_process	GO:0060425	lung morphogenesis	10	12	53	13.77	0.2
biological_process	GO:0085029	extracellular matrix assembly	10	12	53	13.77	0.2
biological_process	GO:0090003	regulation of establishment of protein localization to plasma membrane	10	12	53	13.77	0.2
cellular_component	GO:0042788	polysomal ribosome	10	12	53	13.77	0.2
biological_process	GO:0014036	neural crest cell fate specification	10	13	53	12.71	0.2
biological_process	GO:0045839	negative regulation of mitosis	10	13	53	12.71	0.2
biological_process	GO:2000344	positive regulation of acrosome reaction	10	13	53	12.71	0.2
biological_process	GO:0007262	STAT protein import into nucleus	10	14	53	11.81	0.2
biological_process	GO:0050872	white fat cell differentiation	10	14	53	11.81	0.2
cellular_component	GO:0005916	fascia adherens	10	14	53	11.81	0.2
cellular_component	GO:0033276	transcription factor TFTC complex	10	14	53	11.81	0.2
molecular_function	GO:0005384	manganese ion transmembrane transporter activity	10	14	53	11.81	0.2
biological_process	GO:0021915	neural tube development	10	15	53	11.02	0.2
biological_process	GO:0050765	negative regulation of phagocytosis	10	15	53	11.02	0.2
biological_process	GO:0051354	negative regulation of oxidoreductase activity	10	15	53	11.02	0.2
molecular_function	GO:0045294	alpha-catenin binding	10	15	53	11.02	0.2
biological_process	GO:0001946	lymphangiogenesis	10	16	53	10.33	0.2
biological_process	GO:0032092	positive regulation of protein binding	10	16	53	10.33	0.2
biological_process	GO:0034383	low-density lipoprotein particle clearance	10	16	53	10.33	0.2
biological_process	GO:0042474	middle ear morphogenesis	10	16	53	10.33	0.2
cellular_component	GO:0005915	zonula adherens	10	16	53	10.33	0.2
cellular_component	GO:0016234	inclusion body	10	16	53	10.33	0.2
cellular_component	GO:0071564	npBAF complex	10	16	53	10.33	0.2
cellular_component	GO:0071565	nBAF complex	10	16	53	10.33	0.2
biological_process	GO:0006878	cellular copper ion homeostasis	10	17	53	9.72	0.2
biological_process	GO:0019915	lipid storage	10	17	53	9.72	0.2
biological_process	GO:0045746	negative regulation of Notch signaling pathway	10	17	53	9.72	0.2
biological_process	GO:0046856	phosphatidylinositol dephosphorylation	10	17	53	9.72	0.2
biological_process	GO:0048147	negative regulation of fibroblast proliferation	10	17	53	9.72	0.2
molecular_function	GO:0046870	cadmium ion binding	10	17	53	9.72	0.2
biological_process	GO:0007016	cytoskeletal anchoring at plasma membrane	10	18	53	9.18	0.2
biological_process	GO:0021702	cerebellar Purkinje cell differentiation	10	18	53	9.18	0.2
biological_process	GO:0030901	midbrain development	10	18	53	9.18	0.2
biological_process	GO:0035457	cellular response to interferon-alpha	10	18	53	9.18	0.2
biological_process	GO:0040018	positive regulation of multicellular organism growth	10	18	53	9.18	0.2
biological_process	GO:0061028	establishment of endothelial barrier	10	18	53	9.18	0.2
biological_process	GO:0070528	protein kinase C signaling cascade	10	18	53	9.18	0.2
biological_process	GO:0048566	embryonic digestive tract development	10	19	53	8.7	0.2
biological_process	GO:2000768	positive regulation of nephron tubule epithelial cell differentiation	10	19	53	8.7	0.2
cellular_component	GO:0035861	site of double-strand break	10	19	53	8.7	0.2
molecular_function	GO:0003906	DNA-(apurinic or apyrimidinic site) lyase activity	10	19	53	8.7	0.2
biological_process	GO:0032862	activation of Rho GTPase activity	10	20	53	8.26	0.2
biological_process	GO:0032924	activin receptor signaling pathway	10	20	53	8.26	0.2
biological_process	GO:0030900	forebrain development	10	21	53	7.87	0.2
molecular_function	GO:0005110	frizzled-2 binding	10	21	53	7.87	0.2
biological_process	GO:0006828	manganese ion transport	10	22	53	7.51	0.2
biological_process	GO:0007223	Wnt receptor signaling pathway, calcium modulating pathway	10	22	53	7.51	0.2
biological_process	GO:0010507	negative regulation of autophagy	10	22	53	7.51	0.2
biological_process	GO:0019395	fatty acid oxidation	10	22	53	7.51	0.2
biological_process	GO:0042752	regulation of circadian rhythm	10	22	53	7.51	0.2
biological_process	GO:0008361	regulation of cell size	10	23	53	7.19	0.2
biological_process	GO:0043507	positive regulation of JUN kinase activity	10	23	53	7.19	0.2
biological_process	GO:0006360	transcription from RNA polymerase I promoter	10	26	53	6.36	0.2
biological_process	GO:0006361	transcription initiation from RNA polymerase I promoter	10	26	53	6.36	0.2
molecular_function	GO:0001786	phosphatidylserine binding	10	26	53	6.36	0.2
biological_process	GO:0007220	Notch receptor processing	10	28	53	5.9	0.2
biological_process	GO:2000778	positive regulation of interleukin-6 secretion	10	28	53	5.9	0.2
biological_process	GO:0000733	DNA strand renaturation	10	31	53	5.33	0.2
biological_process	GO:0042517	positive regulation of tyrosine phosphorylation of Stat3 protein	10	32	53	5.17	0.2
molecular_function	GO:0008143	poly(A) RNA binding	10	32	53	5.17	0.2
biological_process	GO:0001503	ossification	10	33	53	5.01	0.2
molecular_function	GO:0008198	ferrous iron binding	10	33	53	5.01	0.2
biological_process	GO:0000077	DNA damage checkpoint	10	35	53	4.72	0.2
biological_process	GO:0010033	response to organic substance	10	35	53	4.72	0.2
biological_process	GO:0010642	negative regulation of platelet-derived growth factor receptor signaling pathway	10	35	53	4.72	0.2
biological_process	GO:0071280	cellular response to copper ion	10	36	53	4.59	0.2
biological_process	GO:0019064	viral entry into host cell via membrane fusion with the plasma membrane	10	38	53	4.35	0.2
biological_process	GO:0010569	regulation of double-strand break repair via homologous recombination	10	39	53	4.24	0.2
biological_process	GO:0043523	regulation of neuron apoptotic process	10	40	53	4.13	0.2
biological_process	GO:0006303	double-strand break repair via nonhomologous end joining	10	41	53	4.03	0.2
biological_process	GO:0071320	cellular response to cAMP	10	41	53	4.03	0.2
molecular_function	GO:0005080	protein kinase C binding	10	41	53	4.03	0.2
biological_process	GO:0030218	erythrocyte differentiation	10	42	53	3.94	0.2
biological_process	GO:0007626	locomotory behavior	10	45	53	3.67	0.2
biological_process	GO:0031146	SCF-dependent proteasomal ubiquitin-dependent protein catabolic process	10	45	53	3.67	0.2
biological_process	GO:0006383	transcription from RNA polymerase III promoter	10	47	53	3.52	0.2
biological_process	GO:0032008	positive regulation of TOR signaling cascade	10	55	53	3.01	0.2
biological_process	GO:0045493	xylan catabolic process	10	60	53	2.75	0.2
cellular_component	GO:0008021	synaptic vesicle	10	61	53	2.71	0.2
biological_process	GO:0051436	negative regulation of ubiquitin-protein ligase activity involved in mitotic cell cycle	10	68	53	2.43	0.2
biological_process	GO:0007601	visual perception	10	88	53	1.88	0.2
cellular_component	GO:0005681	spliceosomal complex	10	88	53	1.88	0.2
biological_process	GO:0019083	viral transcription	10	93	53	1.78	0.2
molecular_function	GO:0004888	transmembrane signaling receptor activity	10	98	53	1.69	0.2
biological_process	GO:0016044	cellular membrane organization	10	103	53	1.6	0.2
biological_process	GO:0030198	extracellular matrix organization	10	106	53	1.56	0.2
biological_process	GO:0006614	SRP-dependent cotranslational protein targeting to membrane	10	107	53	1.54	0.2
biological_process	GO:0050832	defense response to fungus	10	130	53	1.27	0.2
molecular_function	GO:0004930	G-protein coupled receptor activity	10	142	53	1.16	0.2
biological_process	GO:0055085	transmembrane transport	11	569	53	0.32	0.2
biological_process	GO:0006956	complement activation	10	155	53	1.07	0.19
molecular_function	GO:0016491	oxidoreductase activity	10	171	53	0.97	0.19
cellular_component	GO:0005769	early endosome	10	196	53	0.84	0.19
biological_process	GO:0001759	organ induction	9	9	53	16.53	0.18
biological_process	GO:0001809	positive regulation of type IV hypersensitivity	9	9	53	16.53	0.18
biological_process	GO:0001825	blastocyst formation	9	9	53	16.53	0.18
biological_process	GO:0001892	embryonic placenta development	9	9	53	16.53	0.18
biological_process	GO:0002634	regulation of germinal center formation	9	9	53	16.53	0.18
biological_process	GO:0003139	secondary heart field specification	9	9	53	16.53	0.18
biological_process	GO:0003180	aortic valve morphogenesis	9	9	53	16.53	0.18
biological_process	GO:0006359	regulation of transcription from RNA polymerase III promoter	9	9	53	16.53	0.18
biological_process	GO:0010216	maintenance of DNA methylation	9	9	53	16.53	0.18
biological_process	GO:0010513	positive regulation of phosphatidylinositol biosynthetic process	9	9	53	16.53	0.18
biological_process	GO:0010608	posttranscriptional regulation of gene expression	9	9	53	16.53	0.18
biological_process	GO:0019049	evasion or tolerance of host defenses by virus	9	9	53	16.53	0.18
biological_process	GO:0033034	positive regulation of myeloid cell apoptotic process	9	9	53	16.53	0.18
biological_process	GO:0035803	egg coat formation	9	9	53	16.53	0.18
biological_process	GO:0043516	regulation of DNA damage response, signal transduction by p53 class mediator	9	9	53	16.53	0.18
biological_process	GO:0045923	positive regulation of fatty acid metabolic process	9	9	53	16.53	0.18
biological_process	GO:0045943	positive regulation of transcription from RNA polymerase I promoter	9	9	53	16.53	0.18
biological_process	GO:0048096	chromatin-mediated maintenance of transcription	9	9	53	16.53	0.18
biological_process	GO:0048264	determination of ventral identity	9	9	53	16.53	0.18
biological_process	GO:0051247	positive regulation of protein metabolic process	9	9	53	16.53	0.18
biological_process	GO:0060049	regulation of protein glycosylation	9	9	53	16.53	0.18
biological_process	GO:0060067	cervix development	9	9	53	16.53	0.18
biological_process	GO:0060212	negative regulation of nuclear-transcribed mRNA poly(A) tail shortening	9	9	53	16.53	0.18
biological_process	GO:0060221	retinal rod cell differentiation	9	9	53	16.53	0.18
biological_process	GO:0060261	positive regulation of transcription initiation from RNA polymerase II promoter	9	9	53	16.53	0.18
biological_process	GO:0060441	epithelial tube branching involved in lung morphogenesis	9	9	53	16.53	0.18
biological_process	GO:0061047	positive regulation of branching involved in lung morphogenesis	9	9	53	16.53	0.18
biological_process	GO:0061138	morphogenesis of a branching epithelium	9	9	53	16.53	0.18
biological_process	GO:0070535	histone H2A K63-linked ubiquitination	9	9	53	16.53	0.18
biological_process	GO:0070602	regulation of centromeric sister chromatid cohesion	9	9	53	16.53	0.18
biological_process	GO:0070994	detection of oxidative stress	9	9	53	16.53	0.18
biological_process	GO:0071307	cellular response to vitamin K	9	9	53	16.53	0.18
biological_process	GO:0071899	negative regulation of estrogen receptor binding	9	9	53	16.53	0.18
biological_process	GO:0072034	renal vesicle induction	9	9	53	16.53	0.18
biological_process	GO:0080182	histone H3-K4 trimethylation	9	9	53	16.53	0.18
biological_process	GO:0090310	negative regulation of methylation-dependent chromatin silencing	9	9	53	16.53	0.18
biological_process	GO:0090317	negative regulation of intracellular protein transport	9	9	53	16.53	0.18
biological_process	GO:0090402	oncogene-induced senescence	9	9	53	16.53	0.18
biological_process	GO:1900142	negative regulation of oligodendrocyte apoptotic process	9	9	53	16.53	0.18
biological_process	GO:2000368	positive regulation of acrosomal vesicle exocytosis	9	9	53	16.53	0.18
biological_process	GO:2000386	positive regulation of ovarian follicle development	9	9	53	16.53	0.18
biological_process	GO:2000388	positive regulation of antral ovarian follicle growth	9	9	53	16.53	0.18
biological_process	GO:2000461	negative regulation of eukaryotic cell surface binding	9	9	53	16.53	0.18
biological_process	GO:2000478	positive regulation of metanephric glomerular visceral epithelial cell development	9	9	53	16.53	0.18
biological_process	GO:2000533	negative regulation of renal albumin absorption	9	9	53	16.53	0.18
biological_process	GO:2000534	positive regulation of renal albumin absorption	9	9	53	16.53	0.18
biological_process	GO:2000584	negative regulation of platelet-derived growth factor receptor-alpha signaling pathway	9	9	53	16.53	0.18
biological_process	GO:2000590	negative regulation of metanephric mesenchymal cell migration	9	9	53	16.53	0.18
cellular_component	GO:0005677	chromatin silencing complex	9	9	53	16.53	0.18
cellular_component	GO:0016602	CCAAT-binding factor complex	9	9	53	16.53	0.18
molecular_function	GO:0002161	aminoacyl-tRNA editing activity	9	9	53	16.53	0.18
molecular_function	GO:0033558	protein deacetylase activity	9	9	53	16.53	0.18
molecular_function	GO:0070410	co-SMAD binding	9	9	53	16.53	0.18
biological_process	GO:0002052	positive regulation of neuroblast proliferation	9	10	53	14.88	0.18
biological_process	GO:0032825	positive regulation of natural killer cell differentiation	9	10	53	14.88	0.18
biological_process	GO:0046889	positive regulation of lipid biosynthetic process	9	10	53	14.88	0.18
biological_process	GO:0048806	genitalia development	9	10	53	14.88	0.18
biological_process	GO:0050805	negative regulation of synaptic transmission	9	10	53	14.88	0.18
biological_process	GO:0060068	vagina development	9	10	53	14.88	0.18
biological_process	GO:0070498	interleukin-1-mediated signaling pathway	9	10	53	14.88	0.18
biological_process	GO:0070932	histone H3 deacetylation	9	10	53	14.88	0.18
biological_process	GO:0071385	cellular response to glucocorticoid stimulus	9	10	53	14.88	0.18
biological_process	GO:0090279	regulation of calcium ion import	9	10	53	14.88	0.18
biological_process	GO:0097241	hematopoietic stem cell migration to bone marrow	9	10	53	14.88	0.18
biological_process	GO:2000060	positive regulation of protein ubiquitination involved in ubiquitin-dependent protein catabolic process	9	10	53	14.88	0.18
cellular_component	GO:0002081	outer acrosomal membrane	9	10	53	14.88	0.18
molecular_function	GO:0017069	snRNA binding	9	10	53	14.88	0.18
molecular_function	GO:0030598	rRNA N-glycosylase activity	9	10	53	14.88	0.18
biological_process	GO:0001763	morphogenesis of a branching structure	9	11	53	13.52	0.18
biological_process	GO:0002467	germinal center formation	9	11	53	13.52	0.18
biological_process	GO:0007184	SMAD protein import into nucleus	9	11	53	13.52	0.18
biological_process	GO:0035315	hair cell differentiation	9	11	53	13.52	0.18
biological_process	GO:0035754	B cell chemotaxis	9	11	53	13.52	0.18
biological_process	GO:0045077	negative regulation of interferon-gamma biosynthetic process	9	11	53	13.52	0.18
biological_process	GO:0045715	negative regulation of low-density lipoprotein particle receptor biosynthetic process	9	11	53	13.52	0.18
biological_process	GO:0061154	endothelial tube morphogenesis	9	11	53	13.52	0.18
biological_process	GO:0070831	basement membrane assembly	9	11	53	13.52	0.18
biological_process	GO:0072205	metanephric collecting duct development	9	11	53	13.52	0.18
cellular_component	GO:0071141	SMAD protein complex	9	11	53	13.52	0.18
biological_process	GO:0008344	adult locomotory behavior	9	12	53	12.4	0.18
biological_process	GO:0045579	positive regulation of B cell differentiation	9	12	53	12.4	0.18
biological_process	GO:0045596	negative regulation of cell differentiation	9	12	53	12.4	0.18
biological_process	GO:0060492	lung induction	9	12	53	12.4	0.18
molecular_function	GO:0005112	Notch binding	9	12	53	12.4	0.18
molecular_function	GO:0060090	binding, bridging	9	12	53	12.4	0.18
biological_process	GO:0001961	positive regulation of cytokine-mediated signaling pathway	9	13	53	11.44	0.18
biological_process	GO:0035050	embryonic heart tube development	9	13	53	11.44	0.18
biological_process	GO:0071504	cellular response to heparin	9	13	53	11.44	0.18
biological_process	GO:0000395	mRNA 5'-splice site recognition	9	14	53	10.63	0.18
biological_process	GO:0001890	placenta development	9	14	53	10.63	0.18
biological_process	GO:0010801	negative regulation of peptidyl-threonine phosphorylation	9	14	53	10.63	0.18
biological_process	GO:0030099	myeloid cell differentiation	9	14	53	10.63	0.18
biological_process	GO:0031929	TOR signaling cascade	9	14	53	10.63	0.18
biological_process	GO:0046813	virion attachment, binding of host cell surface receptor	9	14	53	10.63	0.18
biological_process	GO:0071421	manganese ion transmembrane transport	9	14	53	10.63	0.18
biological_process	GO:0072332	intrinsic apoptotic signaling pathway by p53 class mediator	9	14	53	10.63	0.18
biological_process	GO:0030917	midbrain-hindbrain boundary development	9	15	53	9.92	0.18
biological_process	GO:0043985	histone H4-R3 methylation	9	15	53	9.92	0.18
biological_process	GO:0051716	cellular response to stimulus	9	16	53	9.3	0.18
molecular_function	GO:0051219	phosphoprotein binding	9	16	53	9.3	0.18
biological_process	GO:0010575	positive regulation vascular endothelial growth factor production	9	17	53	8.75	0.18
biological_process	GO:0032435	negative regulation of proteasomal ubiquitin-dependent protein catabolic process	9	17	53	8.75	0.18
biological_process	GO:0043069	negative regulation of programmed cell death	9	17	53	8.75	0.18
biological_process	GO:0048813	dendrite morphogenesis	9	17	53	8.75	0.18
biological_process	GO:0010613	positive regulation of cardiac muscle hypertrophy	9	18	53	8.26	0.18
biological_process	GO:0032870	cellular response to hormone stimulus	9	18	53	8.26	0.18
biological_process	GO:0048666	neuron development	9	18	53	8.26	0.18
biological_process	GO:0006362	transcription elongation from RNA polymerase I promoter	9	19	53	7.83	0.18
molecular_function	GO:0048037	cofactor binding	9	19	53	7.83	0.18
biological_process	GO:0021987	cerebral cortex development	9	20	53	7.44	0.18
biological_process	GO:0070783	growth of unicellular organism as a thread of attached cells	9	20	53	7.44	0.18
biological_process	GO:1900430	positive regulation of filamentous growth of a population of unicellular organisms	9	20	53	7.44	0.18
biological_process	GO:0006882	cellular zinc ion homeostasis	9	21	53	7.08	0.18
biological_process	GO:0007339	binding of sperm to zona pellucida	9	21	53	7.08	0.18
biological_process	GO:0010390	histone monoubiquitination	9	21	53	7.08	0.18
biological_process	GO:0030194	positive regulation of blood coagulation	9	21	53	7.08	0.18
biological_process	GO:0030330	DNA damage response, signal transduction by p53 class mediator	9	21	53	7.08	0.18
biological_process	GO:0045861	negative regulation of proteolysis	9	22	53	6.76	0.18
biological_process	GO:0035307	positive regulation of protein dephosphorylation	9	23	53	6.47	0.18
biological_process	GO:0045190	isotype switching	9	23	53	6.47	0.18
cellular_component	GO:0001669	acrosomal vesicle	9	23	53	6.47	0.18
biological_process	GO:0002455	humoral immune response mediated by circulating immunoglobulin	9	25	53	5.95	0.18
biological_process	GO:0006363	termination of RNA polymerase I transcription	9	25	53	5.95	0.18
biological_process	GO:0016358	dendrite development	9	25	53	5.95	0.18
biological_process	GO:0033077	T cell differentiation in thymus	9	25	53	5.95	0.18
biological_process	GO:0071276	cellular response to cadmium ion	9	25	53	5.95	0.18
biological_process	GO:0042325	regulation of phosphorylation	9	26	53	5.72	0.18
biological_process	GO:0043542	endothelial cell migration	9	26	53	5.72	0.18
biological_process	GO:2000484	positive regulation of interleukin-8 secretion	9	27	53	5.51	0.18
biological_process	GO:0006707	cholesterol catabolic process	9	29	53	5.13	0.18
biological_process	GO:0006171	cAMP biosynthetic process	9	30	53	4.96	0.18
biological_process	GO:0014065	phosphatidylinositol 3-kinase cascade	9	30	53	4.96	0.18
biological_process	GO:0035235	ionotropic glutamate receptor signaling pathway	9	30	53	4.96	0.18
cellular_component	GO:0005771	multivesicular body	9	31	53	4.8	0.18
biological_process	GO:0035025	positive regulation of Rho protein signal transduction	9	32	53	4.65	0.18
biological_process	GO:1900429	negative regulation of filamentous growth of a population of unicellular organisms	9	33	53	4.51	0.18
biological_process	GO:0031124	mRNA 3'-end processing	9	34	53	4.38	0.18
biological_process	GO:0045987	positive regulation of smooth muscle contraction	9	36	53	4.13	0.18
molecular_function	GO:0005099	Ras GTPase activator activity	9	37	53	4.02	0.18
biological_process	GO:0007126	meiosis	9	38	53	3.91	0.18
biological_process	GO:0032880	regulation of protein localization	9	39	53	3.81	0.18
biological_process	GO:0051297	centrosome organization	9	39	53	3.81	0.18
molecular_function	GO:0042169	SH2 domain binding	9	42	53	3.54	0.18
biological_process	GO:0006369	termination of RNA polymerase II transcription	9	44	53	3.38	0.18
biological_process	GO:0051592	response to calcium ion	9	44	53	3.38	0.18
cellular_component	GO:0030136	clathrin-coated vesicle	9	56	53	2.66	0.18
molecular_function	GO:0019902	phosphatase binding	9	57	53	2.61	0.18
biological_process	GO:0016310	phosphorylation	9	65	53	2.29	0.18
biological_process	GO:0007565	female pregnancy	9	66	53	2.25	0.18
cellular_component	GO:0030666	endocytic vesicle membrane	9	68	53	2.19	0.18
biological_process	GO:0019430	removal of superoxide radicals	9	69	53	2.16	0.18
biological_process	GO:0016049	cell growth	9	72	53	2.07	0.18
biological_process	GO:0000723	telomere maintenance	9	73	53	2.04	0.18
cellular_component	GO:0005578	proteinaceous extracellular matrix	9	76	53	1.96	0.18
biological_process	GO:0031505	fungal-type cell wall organization	9	80	53	1.86	0.18
biological_process	GO:0006265	DNA topological change	9	91	53	1.63	0.18
biological_process	GO:0045926	negative regulation of growth	9	94	53	1.58	0.18
cellular_component	GO:0005694	chromosome	9	116	53	1.28	0.18
biological_process	GO:0002479	antigen processing and presentation of exogenous peptide antigen via MHC class I, TAP-dependent	9	123	53	1.21	0.18
biological_process	GO:0042590	antigen processing and presentation of exogenous peptide antigen via MHC class I	9	128	53	1.16	0.18
biological_process	GO:0002474	antigen processing and presentation of peptide antigen via MHC class I	9	142	53	1.05	0.18
biological_process	GO:0055114	oxidation-reduction process	10	427	53	0.39	0.18
cellular_component	GO:0022627	cytosolic small ribosomal subunit	9	173	53	0.86	0.17
biological_process	GO:0006457	protein folding	9	179	53	0.83	0.17
biological_process	GO:0034641	cellular nitrogen compound metabolic process	9	191	53	0.78	0.17
biological_process	GO:0043687	post-translational protein modification	9	190	53	0.78	0.17
biological_process	GO:0050829	defense response to Gram-negative bacterium	9	197	53	0.76	0.17
molecular_function	GO:0020037	heme binding	9	265	53	0.56	0.17
biological_process	GO:0001840	neural plate development	8	8	53	16.53	0.16
biological_process	GO:0001868	regulation of complement activation, lectin pathway	8	8	53	16.53	0.16
biological_process	GO:0002248	connective tissue replacement involved in inflammatory response wound healing	8	8	53	16.53	0.16
biological_process	GO:0006288	base-excision repair, DNA ligation	8	8	53	16.53	0.16
biological_process	GO:0007366	periodic partitioning by pair rule gene	8	8	53	16.53	0.16
biological_process	GO:0010185	regulation of cellular defense response	8	8	53	16.53	0.16
biological_process	GO:0010586	miRNA metabolic process	8	8	53	16.53	0.16
biological_process	GO:0010587	miRNA catabolic process	8	8	53	16.53	0.16
biological_process	GO:0010909	positive regulation of heparan sulfate proteoglycan biosynthetic process	8	8	53	16.53	0.16
biological_process	GO:0010954	positive regulation of protein processing	8	8	53	16.53	0.16
biological_process	GO:0010955	negative regulation of protein processing	8	8	53	16.53	0.16
biological_process	GO:0019218	regulation of steroid metabolic process	8	8	53	16.53	0.16
biological_process	GO:0032348	negative regulation of aldosterone biosynthetic process	8	8	53	16.53	0.16
biological_process	GO:0033210	leptin-mediated signaling pathway	8	8	53	16.53	0.16
biological_process	GO:0033574	response to testosterone stimulus	8	8	53	16.53	0.16
biological_process	GO:0035279	mRNA cleavage involved in gene silencing by miRNA	8	8	53	16.53	0.16
biological_process	GO:0035846	oviduct epithelium development	8	8	53	16.53	0.16
biological_process	GO:0035847	uterine epithelium development	8	8	53	16.53	0.16
biological_process	GO:0035987	endodermal cell differentiation	8	8	53	16.53	0.16
biological_process	GO:0036091	positive regulation of transcription from RNA polymerase II promoter in response to oxidative stress	8	8	53	16.53	0.16
biological_process	GO:0043620	regulation of DNA-dependent transcription in response to stress	8	8	53	16.53	0.16
biological_process	GO:0044334	canonical Wnt receptor signaling pathway involved in positive regulation of epithelial to mesenchymal transition	8	8	53	16.53	0.16
biological_process	GO:0045225	negative regulation of CD4 biosynthetic process	8	8	53	16.53	0.16
biological_process	GO:0045945	positive regulation of transcription from RNA polymerase III promoter	8	8	53	16.53	0.16
biological_process	GO:0046543	development of secondary female sexual characteristics	8	8	53	16.53	0.16
biological_process	GO:0046776	suppression by virus of host antigen processing and presentation of peptide antigen via MHC class I	8	8	53	16.53	0.16
biological_process	GO:0048660	regulation of smooth muscle cell proliferation	8	8	53	16.53	0.16
biological_process	GO:0050684	regulation of mRNA processing	8	8	53	16.53	0.16
biological_process	GO:0051788	response to misfolded protein	8	8	53	16.53	0.16
biological_process	GO:0052085	negative regulation by symbiont of host T-cell mediated immune response	8	8	53	16.53	0.16
biological_process	GO:0055073	cadmium ion homeostasis	8	8	53	16.53	0.16
biological_process	GO:0060050	positive regulation of protein glycosylation	8	8	53	16.53	0.16
biological_process	GO:0060066	oviduct development	8	8	53	16.53	0.16
biological_process	GO:0060487	lung epithelial cell differentiation	8	8	53	16.53	0.16
biological_process	GO:0060729	intestinal epithelial structure maintenance	8	8	53	16.53	0.16
biological_process	GO:0060770	negative regulation of epithelial cell proliferation involved in prostate gland development	8	8	53	16.53	0.16
biological_process	GO:0061314	Notch signaling involved in heart development	8	8	53	16.53	0.16
biological_process	GO:0070940	dephosphorylation of RNA polymerase II C-terminal domain	8	8	53	16.53	0.16
biological_process	GO:0072179	nephric duct formation	8	8	53	16.53	0.16
biological_process	GO:0097214	positive regulation of lysosomal membrane permeability	8	8	53	16.53	0.16
biological_process	GO:2000008	regulation of protein localization to cell surface	8	8	53	16.53	0.16
biological_process	GO:2000065	negative regulation of cortisol biosynthetic process	8	8	53	16.53	0.16
biological_process	GO:2000111	positive regulation of macrophage apoptotic process	8	8	53	16.53	0.16
biological_process	GO:2000376	positive regulation of oxygen metabolic process	8	8	53	16.53	0.16
biological_process	GO:2000836	positive regulation of androgen secretion	8	8	53	16.53	0.16
cellular_component	GO:0035770	ribonucleoprotein granule	8	8	53	16.53	0.16
cellular_component	GO:0044609	DBIRD complex	8	8	53	16.53	0.16
cellular_component	GO:0070369	beta-catenin-TCF7L2 complex	8	8	53	16.53	0.16
molecular_function	GO:0001190	RNA polymerase II transcription factor binding transcription factor activity involved in positive regulation of transcription	8	8	53	16.53	0.16
molecular_function	GO:0001191	RNA polymerase II transcription factor binding transcription factor activity involved in negative regulation of transcription	8	8	53	16.53	0.16
molecular_function	GO:0003886	DNA (cytosine-5-)-methyltransferase activity	8	8	53	16.53	0.16
molecular_function	GO:0035438	cyclic-di-GMP binding	8	8	53	16.53	0.16
molecular_function	GO:0043734	DNA-N1-methyladenine dioxygenase activity	8	8	53	16.53	0.16
biological_process	GO:0001779	natural killer cell differentiation	8	9	53	14.69	0.16
biological_process	GO:0007176	regulation of epidermal growth factor-activated receptor activity	8	9	53	14.69	0.16
biological_process	GO:0007379	segment specification	8	9	53	14.69	0.16
biological_process	GO:0016331	morphogenesis of embryonic epithelium	8	9	53	14.69	0.16
biological_process	GO:0030262	apoptotic nuclear changes	8	9	53	14.69	0.16
biological_process	GO:0030858	positive regulation of epithelial cell differentiation	8	9	53	14.69	0.16
biological_process	GO:0031123	RNA 3'-end processing	8	9	53	14.69	0.16
biological_process	GO:0032368	regulation of lipid transport	8	9	53	14.69	0.16
biological_process	GO:0039003	pronephric field specification	8	9	53	14.69	0.16
biological_process	GO:0042035	regulation of cytokine biosynthetic process	8	9	53	14.69	0.16
biological_process	GO:0042051	compound eye photoreceptor development	8	9	53	14.69	0.16
biological_process	GO:0044242	cellular lipid catabolic process	8	9	53	14.69	0.16
biological_process	GO:0048708	astrocyte differentiation	8	9	53	14.69	0.16
biological_process	GO:0055069	zinc ion homeostasis	8	9	53	14.69	0.16
biological_process	GO:0061101	neuroendocrine cell differentiation	8	9	53	14.69	0.16
biological_process	GO:0070306	lens fiber cell differentiation	8	9	53	14.69	0.16
biological_process	GO:2000648	positive regulation of stem cell proliferation	8	9	53	14.69	0.16
biological_process	GO:2000741	positive regulation of mesenchymal stem cell differentiation	8	9	53	14.69	0.16
molecular_function	GO:0001103	RNA polymerase II repressing transcription factor binding	8	9	53	14.69	0.16
molecular_function	GO:0005000	vasopressin receptor activity	8	9	53	14.69	0.16
molecular_function	GO:0048027	mRNA 5'-UTR binding	8	9	53	14.69	0.16
molecular_function	GO:0097100	supercoiled DNA binding	8	9	53	14.69	0.16
biological_process	GO:0002903	negative regulation of B cell apoptotic process	8	10	53	13.22	0.16
biological_process	GO:0005979	regulation of glycogen biosynthetic process	8	10	53	13.22	0.16
biological_process	GO:0021510	spinal cord development	8	10	53	13.22	0.16
biological_process	GO:0032417	positive regulation of sodium:hydrogen antiporter activity	8	10	53	13.22	0.16
biological_process	GO:0032703	negative regulation of interleukin-2 production	8	10	53	13.22	0.16
biological_process	GO:0032722	positive regulation of chemokine production	8	10	53	13.22	0.16
biological_process	GO:0055009	atrial cardiac muscle tissue morphogenesis	8	10	53	13.22	0.16
biological_process	GO:0060426	lung vasculature development	8	10	53	13.22	0.16
biological_process	GO:0001782	B cell homeostasis	8	11	53	12.02	0.16
biological_process	GO:0030856	regulation of epithelial cell differentiation	8	11	53	12.02	0.16
biological_process	GO:0043518	negative regulation of DNA damage response, signal transduction by p53 class mediator	8	11	53	12.02	0.16
biological_process	GO:0048469	cell maturation	8	11	53	12.02	0.16
biological_process	GO:1900443	regulation of filamentous growth of a population of unicellular organisms in response to biotic stimulus	8	11	53	12.02	0.16
cellular_component	GO:0035631	CD40 receptor complex	8	11	53	12.02	0.16
biological_process	GO:0045445	myoblast differentiation	8	12	53	11.02	0.16
cellular_component	GO:0000792	heterochromatin	8	12	53	11.02	0.16
molecular_function	GO:0005487	nucleocytoplasmic transporter activity	8	12	53	11.02	0.16
molecular_function	GO:0030332	cyclin binding	8	12	53	11.02	0.16
molecular_function	GO:0031624	ubiquitin conjugating enzyme binding	8	12	53	11.02	0.16
biological_process	GO:0030220	platelet formation	8	13	53	10.17	0.16
biological_process	GO:0034063	stress granule assembly	8	13	53	10.17	0.16
biological_process	GO:0042346	positive regulation of NF-kappaB import into nucleus	8	13	53	10.17	0.16
biological_process	GO:0045719	negative regulation of glycogen biosynthetic process	8	13	53	10.17	0.16
cellular_component	GO:0005637	nuclear inner membrane	8	13	53	10.17	0.16
cellular_component	GO:0034366	spherical high-density lipoprotein particle	8	13	53	10.17	0.16
molecular_function	GO:0017048	Rho GTPase binding	8	13	53	10.17	0.16
molecular_function	GO:0070016	armadillo repeat domain binding	8	13	53	10.17	0.16
molecular_function	GO:0071889	14-3-3 protein binding	8	13	53	10.17	0.16
biological_process	GO:0006307	DNA dealkylation involved in DNA repair	8	14	53	9.45	0.16
biological_process	GO:0010744	positive regulation of macrophage derived foam cell differentiation	8	14	53	9.45	0.16
biological_process	GO:0042769	DNA damage response, detection of DNA damage	8	14	53	9.45	0.16
biological_process	GO:0045736	negative regulation of cyclin-dependent protein kinase activity	8	14	53	9.45	0.16
biological_process	GO:0045821	positive regulation of glycolysis	8	14	53	9.45	0.16
biological_process	GO:2001238	positive regulation of extrinsic apoptotic signaling pathway	8	14	53	9.45	0.16
cellular_component	GO:0071547	piP-body	8	14	53	9.45	0.16
biological_process	GO:0007095	mitotic cell cycle G2/M transition DNA damage checkpoint	8	15	53	8.82	0.16
biological_process	GO:0031069	hair follicle morphogenesis	8	15	53	8.82	0.16
biological_process	GO:0033504	floor plate development	8	15	53	8.82	0.16
biological_process	GO:1900231	regulation of single-species biofilm formation on inanimate substrate	8	15	53	8.82	0.16
cellular_component	GO:0016580	Sin3 complex	8	15	53	8.82	0.16
biological_process	GO:0007595	lactation	8	16	53	8.26	0.16
cellular_component	GO:0030877	beta-catenin destruction complex	8	16	53	8.26	0.16
biological_process	GO:0030818	negative regulation of cAMP biosynthetic process	8	17	53	7.78	0.16
biological_process	GO:1900442	positive regulation of filamentous growth of a population of unicellular organisms in response to neutral pH	8	17	53	7.78	0.16
molecular_function	GO:0017091	AU-rich element binding	8	17	53	7.78	0.16
molecular_function	GO:0035197	siRNA binding	8	17	53	7.78	0.16
molecular_function	GO:0042806	fucose binding	8	17	53	7.78	0.16
biological_process	GO:0045184	establishment of protein localization	8	18	53	7.35	0.16
biological_process	GO:0006476	protein deacetylation	8	19	53	6.96	0.16
biological_process	GO:0007611	learning or memory	8	19	53	6.96	0.16
biological_process	GO:0010833	telomere maintenance via telomere lengthening	8	19	53	6.96	0.16
molecular_function	GO:0000340	RNA 7-methylguanosine cap binding	8	19	53	6.96	0.16
biological_process	GO:0032095	regulation of response to food	8	20	53	6.61	0.16
biological_process	GO:0051482	elevation of cytosolic calcium ion concentration involved in phospholipase C-activating G-protein coupled signaling pathway	8	20	53	6.61	0.16
biological_process	GO:0006275	regulation of DNA replication	8	21	53	6.3	0.16
biological_process	GO:0030838	positive regulation of actin filament polymerization	8	21	53	6.3	0.16
cellular_component	GO:0035102	PRC1 complex	8	21	53	6.3	0.16
biological_process	GO:0000245	spliceosomal complex assembly	8	22	53	6.01	0.16
biological_process	GO:0002218	activation of innate immune response	8	22	53	6.01	0.16
biological_process	GO:0042552	myelination	8	22	53	6.01	0.16
biological_process	GO:0045765	regulation of angiogenesis	8	22	53	6.01	0.16
biological_process	GO:0070417	cellular response to cold	8	22	53	6.01	0.16
biological_process	GO:1900436	positive regulation of filamentous growth of a population of unicellular organisms in response to starvation	8	22	53	6.01	0.16
molecular_function	GO:0008656	cysteine-type endopeptidase activator activity involved in apoptotic process	8	22	53	6.01	0.16
biological_process	GO:0000289	nuclear-transcribed mRNA poly(A) tail shortening	8	23	53	5.75	0.16
molecular_function	GO:0019838	growth factor binding	8	23	53	5.75	0.16
biological_process	GO:0006754	ATP biosynthetic process	8	24	53	5.51	0.16
biological_process	GO:0006829	zinc ion transport	8	24	53	5.51	0.16
biological_process	GO:0050870	positive regulation of T cell activation	8	24	53	5.51	0.16
biological_process	GO:0036166	phenotypic switching	8	26	53	5.09	0.16
biological_process	GO:0006694	steroid biosynthetic process	8	27	53	4.9	0.16
biological_process	GO:0043517	positive regulation of DNA damage response, signal transduction by p53 class mediator	8	27	53	4.9	0.16
biological_process	GO:0031334	positive regulation of protein complex assembly	8	28	53	4.72	0.16
molecular_function	GO:0004714	transmembrane receptor protein tyrosine kinase activity	8	30	53	4.41	0.16
molecular_function	GO:0016407	acetyltransferase activity	8	30	53	4.41	0.16
biological_process	GO:0006796	phosphate-containing compound metabolic process	8	31	53	4.27	0.16
biological_process	GO:0007031	peroxisome organization	8	34	53	3.89	0.16
biological_process	GO:0042059	negative regulation of epidermal growth factor receptor signaling pathway	8	34	53	3.89	0.16
cellular_component	GO:0044444	cytoplasmic part	8	34	53	3.89	0.16
biological_process	GO:0046676	negative regulation of insulin secretion	8	35	53	3.78	0.16
cellular_component	GO:0035098	ESC/E(Z) complex	8	38	53	3.48	0.16
biological_process	GO:0007250	activation of NF-kappaB-inducing kinase activity	8	43	53	3.08	0.16
molecular_function	GO:0001965	G-protein alpha-subunit binding	8	43	53	3.08	0.16
biological_process	GO:0007162	negative regulation of cell adhesion	8	44	53	3.01	0.16
biological_process	GO:0006801	superoxide metabolic process	8	45	53	2.94	0.16
biological_process	GO:0006509	membrane protein ectodomain proteolysis	8	48	53	2.75	0.16
biological_process	GO:0008340	determination of adult lifespan	8	48	53	2.75	0.16
biological_process	GO:0070536	protein K63-linked deubiquitination	8	48	53	2.75	0.16
biological_process	GO:0006921	cellular component disassembly involved in execution phase of apoptosis	8	49	53	2.7	0.16
cellular_component	GO:0031966	mitochondrial membrane	8	49	53	2.7	0.16
molecular_function	GO:0031593	polyubiquitin binding	8	50	53	2.64	0.16
molecular_function	GO:0004003	ATP-dependent DNA helicase activity	8	54	53	2.45	0.16
biological_process	GO:0030334	regulation of cell migration	8	56	53	2.36	0.16
cellular_component	GO:0000786	nucleosome	8	56	53	2.36	0.16
cellular_component	GO:0014069	postsynaptic density	8	56	53	2.36	0.16
biological_process	GO:0007160	cell-matrix adhesion	8	58	53	2.28	0.16
molecular_function	GO:0008289	lipid binding	8	58	53	2.28	0.16
biological_process	GO:0006626	protein targeting to mitochondrion	8	65	53	2.03	0.16
biological_process	GO:0006987	activation of signaling protein activity involved in unfolded protein response	8	66	53	2	0.16
cellular_component	GO:0035267	NuA4 histone acetyltransferase complex	8	66	53	2	0.16
biological_process	GO:0007202	activation of phospholipase C activity	8	73	53	1.81	0.16
biological_process	GO:0016197	endosomal transport	8	73	53	1.81	0.16
biological_process	GO:0034329	cell junction assembly	8	77	53	1.72	0.16
biological_process	GO:0030968	endoplasmic reticulum unfolded protein response	8	86	53	1.54	0.16
cellular_component	GO:0000922	spindle pole	8	88	53	1.5	0.16
cellular_component	GO:0005741	mitochondrial outer membrane	8	116	53	1.14	0.16
biological_process	GO:0051056	regulation of small GTPase mediated signal transduction	8	123	53	1.08	0.16
molecular_function	GO:0051015	actin filament binding	8	124	53	1.07	0.16
molecular_function	GO:0004867	serine-type endopeptidase inhibitor activity	8	191	53	0.69	0.15
molecular_function	GO:0003924	GTPase activity	8	406	53	0.33	0.15
biological_process	GO:0002043	blood vessel endothelial cell proliferation involved in sprouting angiogenesis	7	7	53	16.53	0.14
biological_process	GO:0002074	extraocular skeletal muscle development	7	7	53	16.53	0.14
biological_process	GO:0002309	T cell proliferation involved in immune response	7	7	53	16.53	0.14
biological_process	GO:0002683	negative regulation of immune system process	7	7	53	16.53	0.14
biological_process	GO:0003156	regulation of organ formation	7	7	53	16.53	0.14
biological_process	GO:0003181	atrioventricular valve morphogenesis	7	7	53	16.53	0.14
biological_process	GO:0003357	noradrenergic neuron differentiation	7	7	53	16.53	0.14
biological_process	GO:0003413	chondrocyte differentiation involved in endochondral bone morphogenesis	7	7	53	16.53	0.14
biological_process	GO:0003415	chondrocyte hypertrophy	7	7	53	16.53	0.14
biological_process	GO:0010832	negative regulation of myotube differentiation	7	7	53	16.53	0.14
biological_process	GO:0010870	positive regulation of receptor biosynthetic process	7	7	53	16.53	0.14
biological_process	GO:0014707	branchiomeric skeletal muscle development	7	7	53	16.53	0.14
biological_process	GO:0016458	gene silencing	7	7	53	16.53	0.14
biological_process	GO:0018393	internal peptidyl-lysine acetylation	7	7	53	16.53	0.14
biological_process	GO:0019100	male germ-line sex determination	7	7	53	16.53	0.14
biological_process	GO:0021542	dentate gyrus development	7	7	53	16.53	0.14
biological_process	GO:0031507	heterochromatin assembly	7	7	53	16.53	0.14
biological_process	GO:0031665	negative regulation of lipopolysaccharide-mediated signaling pathway	7	7	53	16.53	0.14
biological_process	GO:0032786	positive regulation of DNA-dependent transcription, elongation	7	7	53	16.53	0.14
biological_process	GO:0033144	negative regulation of intracellular steroid hormone receptor signaling pathway	7	7	53	16.53	0.14
biological_process	GO:0035067	negative regulation of histone acetylation	7	7	53	16.53	0.14
biological_process	GO:0035305	negative regulation of dephosphorylation	7	7	53	16.53	0.14
biological_process	GO:0035802	adrenal cortex formation	7	7	53	16.53	0.14
biological_process	GO:0042985	negative regulation of amyloid precursor protein biosynthetic process	7	7	53	16.53	0.14
biological_process	GO:0043153	entrainment of circadian clock by photoperiod	7	7	53	16.53	0.14
biological_process	GO:0045652	regulation of megakaryocyte differentiation	7	7	53	16.53	0.14
biological_process	GO:0046533	negative regulation of photoreceptor cell differentiation	7	7	53	16.53	0.14
biological_process	GO:0048239	negative regulation of DNA recombination at telomere	7	7	53	16.53	0.14
biological_process	GO:0048617	embryonic foregut morphogenesis	7	7	53	16.53	0.14
biological_process	GO:0048732	gland development	7	7	53	16.53	0.14
biological_process	GO:0055012	ventricular cardiac muscle cell differentiation	7	7	53	16.53	0.14
biological_process	GO:0060413	atrial septum morphogenesis	7	7	53	16.53	0.14
biological_process	GO:0060435	bronchiole development	7	7	53	16.53	0.14
biological_process	GO:0060517	epithelial cell proliferation involved in prostatic bud elongation	7	7	53	16.53	0.14
biological_process	GO:0060716	labyrinthine layer blood vessel development	7	7	53	16.53	0.14
biological_process	GO:0060749	mammary gland alveolus development	7	7	53	16.53	0.14
biological_process	GO:0060784	regulation of cell proliferation involved in tissue homeostasis	7	7	53	16.53	0.14
biological_process	GO:0070934	CRD-mediated mRNA stabilization	7	7	53	16.53	0.14
biological_process	GO:0071374	cellular response to parathyroid hormone stimulus	7	7	53	16.53	0.14
biological_process	GO:0072095	regulation of branch elongation involved in ureteric bud branching	7	7	53	16.53	0.14
biological_process	GO:0072125	negative regulation of glomerular mesangial cell proliferation	7	7	53	16.53	0.14
biological_process	GO:0072172	mesonephric tubule formation	7	7	53	16.53	0.14
biological_process	GO:0090314	positive regulation of protein targeting to membrane	7	7	53	16.53	0.14
biological_process	GO:0090315	negative regulation of protein targeting to membrane	7	7	53	16.53	0.14
biological_process	GO:1900212	negative regulation of mesenchymal cell apoptotic process involved in metanephros development	7	7	53	16.53	0.14
biological_process	GO:1900218	negative regulation of apoptotic process involved in metanephric nephron tubule development	7	7	53	16.53	0.14
biological_process	GO:2000036	regulation of stem cell maintenance	7	7	53	16.53	0.14
biological_process	GO:2000664	positive regulation of interleukin-5 secretion	7	7	53	16.53	0.14
biological_process	GO:2000667	positive regulation of interleukin-13 secretion	7	7	53	16.53	0.14
biological_process	GO:2000974	negative regulation of pro-B cell differentiation	7	7	53	16.53	0.14
biological_process	GO:2001153	positive regulation of renal water transport	7	7	53	16.53	0.14
biological_process	GO:2001162	positive regulation of histone H3-K79 methylation	7	7	53	16.53	0.14
cellular_component	GO:0033553	rDNA heterochromatin	7	7	53	16.53	0.14
cellular_component	GO:0035068	micro-ribonucleoprotein complex	7	7	53	16.53	0.14
molecular_function	GO:0016312	inositol bisphosphate phosphatase activity	7	7	53	16.53	0.14
molecular_function	GO:0034485	phosphatidylinositol-3,4,5-trisphosphate 5-phosphatase activity	7	7	53	16.53	0.14
molecular_function	GO:0034595	phosphatidylinositol phosphate 5-phosphatase activity	7	7	53	16.53	0.14
molecular_function	GO:0042975	peroxisome proliferator activated receptor binding	7	7	53	16.53	0.14
biological_process	GO:0007260	tyrosine phosphorylation of STAT protein	7	8	53	14.46	0.14
biological_process	GO:0030854	positive regulation of granulocyte differentiation	7	8	53	14.46	0.14
biological_process	GO:0030997	regulation of centriole-centriole cohesion	7	8	53	14.46	0.14
biological_process	GO:0032463	negative regulation of protein homooligomerization	7	8	53	14.46	0.14
biological_process	GO:0033522	histone H2A ubiquitination	7	8	53	14.46	0.14
biological_process	GO:0035988	chondrocyte proliferation	7	8	53	14.46	0.14
biological_process	GO:0042473	outer ear morphogenesis	7	8	53	14.46	0.14
biological_process	GO:0048263	determination of dorsal identity	7	8	53	14.46	0.14
biological_process	GO:0048669	collateral sprouting in absence of injury	7	8	53	14.46	0.14
biological_process	GO:0048715	negative regulation of oligodendrocyte differentiation	7	8	53	14.46	0.14
biological_process	GO:0051451	myoblast migration	7	8	53	14.46	0.14
biological_process	GO:0060044	negative regulation of cardiac muscle cell proliferation	7	8	53	14.46	0.14
biological_process	GO:0060174	limb bud formation	7	8	53	14.46	0.14
biological_process	GO:0060628	regulation of ER to Golgi vesicle-mediated transport	7	8	53	14.46	0.14
biological_process	GO:0071157	negative regulation of cell cycle arrest	7	8	53	14.46	0.14
biological_process	GO:0090073	positive regulation of protein homodimerization activity	7	8	53	14.46	0.14
cellular_component	GO:0005924	cell-substrate adherens junction	7	8	53	14.46	0.14
cellular_component	GO:0044530	supraspliceosomal complex	7	8	53	14.46	0.14
molecular_function	GO:0004675	transmembrane receptor protein serine/threonine kinase activity	7	8	53	14.46	0.14
molecular_function	GO:0034594	phosphatidylinositol trisphosphate phosphatase activity	7	8	53	14.46	0.14
biological_process	GO:0003170	heart valve development	7	9	53	12.86	0.14
biological_process	GO:0007501	mesodermal cell fate specification	7	9	53	12.86	0.14
biological_process	GO:0007617	mating behavior	7	9	53	12.86	0.14
biological_process	GO:0008595	anterior/posterior axis specification, embryo	7	9	53	12.86	0.14
biological_process	GO:0016202	regulation of striated muscle tissue development	7	9	53	12.86	0.14
biological_process	GO:0045348	positive regulation of MHC class II biosynthetic process	7	9	53	12.86	0.14
biological_process	GO:0048048	embryonic eye morphogenesis	7	9	53	12.86	0.14
biological_process	GO:0060484	lung-associated mesenchyme development	7	9	53	12.86	0.14
biological_process	GO:0060612	adipose tissue development	7	9	53	12.86	0.14
biological_process	GO:0072277	metanephric glomerular capillary formation	7	9	53	12.86	0.14
biological_process	GO:2000466	negative regulation of glycogen (starch) synthase activity	7	9	53	12.86	0.14
molecular_function	GO:0004677	DNA-dependent protein kinase activity	7	9	53	12.86	0.14
biological_process	GO:0008088	axon cargo transport	7	10	53	11.57	0.14
biological_process	GO:0010830	regulation of myotube differentiation	7	10	53	11.57	0.14
biological_process	GO:0030193	regulation of blood coagulation	7	10	53	11.57	0.14
biological_process	GO:0055008	cardiac muscle tissue morphogenesis	7	10	53	11.57	0.14
biological_process	GO:0007252	I-kappaB phosphorylation	7	11	53	10.52	0.14
biological_process	GO:0035518	histone H2A monoubiquitination	7	11	53	10.52	0.14
biological_process	GO:0045672	positive regulation of osteoclast differentiation	7	11	53	10.52	0.14
biological_process	GO:0048675	axon extension	7	11	53	10.52	0.14
cellular_component	GO:0033588	Elongator holoenzyme complex	7	11	53	10.52	0.14
molecular_function	GO:0008266	poly(U) RNA binding	7	11	53	10.52	0.14
molecular_function	GO:0017025	TBP-class protein binding	7	11	53	10.52	0.14
biological_process	GO:0016322	neuron remodeling	7	12	53	9.64	0.14
biological_process	GO:0031848	protection from non-homologous end joining at telomere	7	12	53	9.64	0.14
biological_process	GO:0033683	nucleotide-excision repair, DNA incision	7	12	53	9.64	0.14
biological_process	GO:0042994	cytoplasmic sequestering of transcription factor	7	12	53	9.64	0.14
biological_process	GO:0050803	regulation of synapse structure and activity	7	12	53	9.64	0.14
biological_process	GO:0060038	cardiac muscle cell proliferation	7	12	53	9.64	0.14
biological_process	GO:0061077	chaperone-mediated protein folding	7	12	53	9.64	0.14
molecular_function	GO:0051787	misfolded protein binding	7	12	53	9.64	0.14
biological_process	GO:0010694	positive regulation of alkaline phosphatase activity	7	13	53	8.9	0.14
biological_process	GO:0048514	blood vessel morphogenesis	7	13	53	8.9	0.14
biological_process	GO:0001953	negative regulation of cell-matrix adhesion	7	14	53	8.26	0.14
biological_process	GO:0032099	negative regulation of appetite	7	14	53	8.26	0.14
biological_process	GO:0051443	positive regulation of ubiquitin-protein ligase activity	7	14	53	8.26	0.14
molecular_function	GO:0004126	cytidine deaminase activity	7	14	53	8.26	0.14
molecular_function	GO:0045295	gamma-catenin binding	7	14	53	8.26	0.14
biological_process	GO:0002407	dendritic cell chemotaxis	7	15	53	7.71	0.14
biological_process	GO:0071468	cellular response to acidity	7	15	53	7.71	0.14
biological_process	GO:0007175	negative regulation of epidermal growth factor-activated receptor activity	7	16	53	7.23	0.14
biological_process	GO:0045743	positive regulation of fibroblast growth factor receptor signaling pathway	7	16	53	7.23	0.14
biological_process	GO:0045907	positive regulation of vasoconstriction	7	16	53	7.23	0.14
biological_process	GO:0071472	cellular response to salt stress	7	16	53	7.23	0.14
biological_process	GO:0007199	G-protein coupled receptor signaling pathway coupled to cGMP nucleotide second messenger	7	17	53	6.81	0.14
biological_process	GO:0045070	positive regulation of viral genome replication	7	17	53	6.81	0.14
biological_process	GO:0051497	negative regulation of stress fiber assembly	7	17	53	6.81	0.14
biological_process	GO:0061333	renal tubule morphogenesis	7	17	53	6.81	0.14
cellular_component	GO:0016581	NuRD complex	7	17	53	6.81	0.14
biological_process	GO:0051568	histone H3-K4 methylation	7	18	53	6.43	0.14
biological_process	GO:0071498	cellular response to fluid shear stress	7	18	53	6.43	0.14
molecular_function	GO:0003724	RNA helicase activity	7	18	53	6.43	0.14
biological_process	GO:0034501	protein localization to kinetochore	7	19	53	6.09	0.14
molecular_function	GO:0018024	histone-lysine N-methyltransferase activity	7	19	53	6.09	0.14
biological_process	GO:0034341	response to interferon-gamma	7	20	53	5.79	0.14
biological_process	GO:0050880	regulation of blood vessel size	7	20	53	5.79	0.14
biological_process	GO:0000718	nucleotide-excision repair, DNA damage removal	7	21	53	5.51	0.14
biological_process	GO:0034122	negative regulation of toll-like receptor signaling pathway	7	21	53	5.51	0.14
biological_process	GO:0051298	centrosome duplication	7	22	53	5.26	0.14
biological_process	GO:0072643	interferon-gamma secretion	7	23	53	5.03	0.14
cellular_component	GO:0032589	neuron projection membrane	7	23	53	5.03	0.14
biological_process	GO:0097178	ruffle assembly	7	24	53	4.82	0.14
molecular_function	GO:0042162	telomeric DNA binding	7	24	53	4.82	0.14
cellular_component	GO:0005905	coated pit	7	26	53	4.45	0.14
molecular_function	GO:0030159	receptor signaling complex scaffold activity	7	26	53	4.45	0.14
biological_process	GO:0071777	positive regulation of cell cycle cytokinesis	7	27	53	4.29	0.14
molecular_function	GO:0031681	G-protein beta-subunit binding	7	29	53	3.99	0.14
biological_process	GO:0001819	positive regulation of cytokine production	7	30	53	3.86	0.14
biological_process	GO:0006259	DNA metabolic process	7	31	53	3.73	0.14
biological_process	GO:0008203	cholesterol metabolic process	7	31	53	3.73	0.14
biological_process	GO:0045454	cell redox homeostasis	7	31	53	3.73	0.14
biological_process	GO:0007205	protein kinase C-activating G-protein coupled receptor signaling pathway	7	34	53	3.4	0.14
biological_process	GO:0032956	regulation of actin cytoskeleton organization	7	34	53	3.4	0.14
cellular_component	GO:0005604	basement membrane	7	34	53	3.4	0.14
molecular_function	GO:0004693	cyclin-dependent protein kinase activity	7	34	53	3.4	0.14
biological_process	GO:0010506	regulation of autophagy	7	35	53	3.31	0.14
biological_process	GO:0040008	regulation of growth	7	36	53	3.21	0.14
biological_process	GO:0042542	response to hydrogen peroxide	7	37	53	3.13	0.14
biological_process	GO:0044406	adhesion to host	7	37	53	3.13	0.14
molecular_function	GO:0048306	calcium-dependent protein binding	7	37	53	3.13	0.14
biological_process	GO:0007623	circadian rhythm	7	38	53	3.04	0.14
biological_process	GO:0030217	T cell differentiation	7	42	53	2.75	0.14
biological_process	GO:0035176	social behavior	7	47	53	2.46	0.14
molecular_function	GO:0015485	cholesterol binding	7	48	53	2.41	0.14
molecular_function	GO:0044325	ion channel binding	7	49	53	2.36	0.14
biological_process	GO:0051301	cell division	7	54	53	2.14	0.14
biological_process	GO:0044117	growth of symbiont in host	7	57	53	2.03	0.14
molecular_function	GO:0050660	flavin adenine dinucleotide binding	7	60	53	1.93	0.14
molecular_function	GO:0004004	ATP-dependent RNA helicase activity	7	63	53	1.84	0.14
cellular_component	GO:0045177	apical part of cell	7	64	53	1.81	0.14
molecular_function	GO:0008237	metallopeptidase activity	7	64	53	1.81	0.14
molecular_function	GO:0008408	3'-5' exonuclease activity	7	66	53	1.75	0.14
biological_process	GO:0006091	generation of precursor metabolites and energy	7	69	53	1.68	0.14
molecular_function	GO:0005543	phospholipid binding	7	69	53	1.68	0.14
biological_process	GO:0031532	actin cytoskeleton reorganization	7	70	53	1.65	0.14
cellular_component	GO:0005796	Golgi lumen	7	81	53	1.43	0.14
biological_process	GO:0006094	gluconeogenesis	7	82	53	1.41	0.14
molecular_function	GO:0046872	metal ion binding	7	83	53	1.39	0.14
molecular_function	GO:0051082	unfolded protein binding	7	87	53	1.33	0.14
biological_process	GO:0007005	mitochondrion organization	7	91	53	1.27	0.14
cellular_component	GO:0030176	integral to endoplasmic reticulum membrane	7	105	53	1.1	0.14
cellular_component	GO:0005770	late endosome	7	107	53	1.08	0.14
cellular_component	GO:0005788	endoplasmic reticulum lumen	7	159	53	0.73	0.14
biological_process	GO:0051289	protein homotetramerization	7	202	53	0.57	0.14
molecular_function	GO:0005215	transporter activity	7	219	53	0.53	0.13
cellular_component	GO:0005743	mitochondrial inner membrane	7	321	53	0.36	0.13
biological_process	GO:0006184	GTP catabolic process	7	355	53	0.33	0.13
[truncated: 4,514 more rows]

## Sheet: query_list
Namespace	GO_ID	GO_Name	Together	TermCount	SubjectCount	Score(PR)	Score(S%)
biological_process	GO:0010468	regulation of gene expression	53	53	53	1556.26	100
biological_process	GO:0060059	embryonic retina morphogenesis in camera-type eye	11	15	53	1141.26	19.3
biological_process	GO:2000744	positive regulation of anterior head development	10	10	53	1556.26	18.87
biological_process	GO:0072049	comma-shaped body morphogenesis	10	10	53	1556.26	18.87
biological_process	GO:0072050	S-shaped body morphogenesis	10	10	53	1556.26	18.87
biological_process	GO:0021937	cerebellar Purkinje cell-granule cell precursor cell signaling involved in regulation of granule cell precursor cell proliferation	10	10	53	1556.26	18.87
biological_process	GO:0072077	renal vesicle morphogenesis	10	10	53	1556.26	18.87
biological_process	GO:0021527	spinal cord association neuron differentiation	10	11	53	1414.79	18.52
biological_process	GO:0061205	paramesonephric duct development	10	12	53	1296.89	18.18
biological_process	GO:0001705	ectoderm formation	10	12	53	1296.89	18.18
biological_process	GO:0021871	forebrain regionalization	10	12	53	1296.89	18.18
biological_process	GO:0072178	nephric duct morphogenesis	10	15	53	1037.51	17.24
biological_process	GO:0048646	anatomical structure formation involved in morphogenesis	10	15	53	1037.51	17.24
biological_process	GO:0048703	embryonic viscerocranium morphogenesis	10	16	53	972.67	16.95
biological_process	GO:0021702	cerebellar Purkinje cell differentiation	10	18	53	864.59	16.39
biological_process	GO:2000768	positive regulation of nephron tubule epithelial cell differentiation	10	19	53	819.09	16.13
biological_process	GO:0040019	positive regulation of embryonic development	10	20	53	778.13	15.87
biological_process	GO:0090009	primitive streak formation	10	20	53	778.13	15.87
biological_process	GO:0060322	head development	10	21	53	741.08	15.62
biological_process	GO:0001655	urogenital system development	10	22	53	707.39	15.38
biological_process	GO:0009791	post-embryonic development	10	23	53	676.64	15.15
biological_process	GO:0008045	motor neuron axon guidance	10	23	53	676.64	15.15
biological_process	GO:0035846	oviduct epithelium development	8	8	53	1556.26	15.09
biological_process	GO:0060066	oviduct development	8	8	53	1556.26	15.09
biological_process	GO:0035847	uterine epithelium development	8	8	53	1556.26	15.09
biological_process	GO:0021549	cerebellum development	10	24	53	648.44	14.93
biological_process	GO:0060429	epithelium development	10	24	53	648.44	14.93
biological_process	GO:0060067	cervix development	8	9	53	1383.35	14.81
biological_process	GO:0060068	vagina development	8	10	53	1245.01	14.55
biological_process	GO:0001706	endoderm formation	10	26	53	598.56	14.49
biological_process	GO:0009948	anterior/posterior axis specification	10	27	53	576.39	14.29
biological_process	GO:0001702	gastrulation with mouth forming second	10	30	53	518.75	13.7
biological_process	GO:2000543	positive regulation of gastrulation	10	31	53	502.02	13.51
biological_process	GO:0060065	uterus development	8	16	53	778.13	13.11
biological_process	GO:0009880	embryonic pattern specification	10	35	53	444.65	12.82
molecular_function	GO:0001071	nucleic acid binding transcription factor activity	10	42	53	370.54	11.76
biological_process	GO:0090190	positive regulation of branching involved in ureteric bud morphogenesis	10	43	53	361.92	11.63
biological_process	GO:0001657	ureteric bud development	10	44	53	353.7	11.49
biological_process	GO:0010842	retina layer formation	10	50	53	311.25	10.75
biological_process	GO:0001764	neuron migration	10	66	53	235.8	9.17
biological_process	GO:0009953	dorsal/ventral pattern formation	10	76	53	204.77	8.4
biological_process	GO:0019217	regulation of fatty acid metabolic process	6	31	53	301.21	7.69
biological_process	GO:0009952	anterior/posterior pattern specification	10	88	53	176.85	7.63
biological_process	GO:0009653	anatomical structure morphogenesis	11	111	53	154.22	7.19
biological_process	GO:0001822	kidney development	12	129	53	144.77	7.06
biological_process	GO:0007389	pattern specification process	10	127	53	122.54	5.88
biological_process	GO:0001714	endodermal cell fate specification	3	3	53	1556.26	5.66
biological_process	GO:2001027	negative regulation of endothelial cell chemotaxis	3	3	53	1556.26	5.66
biological_process	GO:0002839	positive regulation of immune response to tumor cell	3	3	53	1556.26	5.66
biological_process	GO:2000504	positive regulation of blood vessel remodeling	3	3	53	1556.26	5.66
biological_process	GO:0010593	negative regulation of lamellipodium assembly	3	4	53	1167.2	5.56
biological_process	GO:1900747	negative regulation of vascular endothelial growth factor signaling pathway	3	4	53	1167.2	5.56
molecular_function	GO:0003714	transcription corepressor activity	13	199	53	101.67	5.44
biological_process	GO:0007162	negative regulation of cell adhesion	5	44	53	176.85	5.43
molecular_function	GO:0019865	immunoglobulin binding	3	7	53	666.97	5.26
biological_process	GO:0043254	regulation of protein complex assembly	3	7	53	666.97	5.26
biological_process	GO:0033629	negative regulation of cell adhesion mediated by integrin	3	7	53	666.97	5.26
biological_process	GO:0010543	regulation of platelet activation	3	7	53	666.97	5.26
molecular_function	GO:0043395	heparan sulfate proteoglycan binding	3	8	53	583.6	5.17
biological_process	GO:0030193	regulation of blood coagulation	3	10	53	466.88	5
biological_process	GO:0050730	regulation of peptidyl-tyrosine phosphorylation	3	12	53	389.07	4.84
biological_process	GO:0007267	cell-cell signaling	13	258	53	78.42	4.36
molecular_function	GO:0050431	transforming growth factor beta binding	3	19	53	245.73	4.35
biological_process	GO:0043537	negative regulation of blood vessel endothelial cell migration	3	22	53	212.22	4.17
biological_process	GO:0035019	somatic stem cell maintenance	3	24	53	194.53	4.05
biological_process	GO:2000599	negative regulation of cyclin catabolic process	2	2	53	1556.26	3.77
biological_process	GO:0046058	cAMP metabolic process	2	3	53	1037.51	3.7
biological_process	GO:0001654	eye development	3	32	53	145.9	3.66
biological_process	GO:0048762	mesenchymal cell differentiation	3	33	53	141.48	3.61
biological_process	GO:0060317	cardiac epithelial to mesenchymal transition	3	34	53	137.32	3.57
biological_process	GO:0032956	regulation of actin cytoskeleton organization	3	34	53	137.32	3.57
biological_process	GO:0033689	negative regulation of osteoblast proliferation	2	6	53	518.75	3.51
biological_process	GO:0021542	dentate gyrus development	2	7	53	444.65	3.45
biological_process	GO:0007143	female meiosis	2	10	53	311.25	3.28
cellular_component	GO:0043234	protein complex	10	263	53	59.17	3.27
biological_process	GO:0042118	endothelial cell activation	2	11	53	282.96	3.23
biological_process	GO:0051894	positive regulation of focal adhesion assembly	3	43	53	108.58	3.23
cellular_component	GO:0005623	cell	2	13	53	239.43	3.12
biological_process	GO:0097150	neuronal stem cell maintenance	2	13	53	239.43	3.12
biological_process	GO:0048477	oogenesis	3	46	53	101.5	3.12
molecular_function	GO:0051879	Hsp90 protein binding	2	14	53	222.32	3.08
molecular_function	GO:0051428	peptide hormone receptor binding	2	17	53	183.09	2.94
molecular_function	GO:0043498	cell surface binding	3	52	53	89.78	2.94
biological_process	GO:0030324	lung development	3	52	53	89.78	2.94
molecular_function	GO:0035198	miRNA binding	2	18	53	172.92	2.9
biological_process	GO:0030501	positive regulation of bone mineralization	3	54	53	86.46	2.88
biological_process	GO:0006366	transcription from RNA polymerase II promoter	12	380	53	49.15	2.85
biological_process	GO:0042789	mRNA transcription from RNA polymerase II promoter	2	21	53	148.22	2.78
biological_process	GO:0000083	regulation of transcription involved in G1/S phase of mitotic cell cycle	2	21	53	148.22	2.78
biological_process	GO:0022408	negative regulation of cell-cell adhesion	2	21	53	148.22	2.78
cellular_component	GO:0000307	cyclin-dependent protein kinase holoenzyme complex	2	25	53	124.5	2.63
biological_process	GO:0001889	liver development	2	26	53	119.71	2.6
biological_process	GO:0048146	positive regulation of fibroblast proliferation	3	75	53	62.25	2.4
cellular_component	GO:0015030	Cajal body	2	33	53	94.32	2.38
molecular_function	GO:0004693	cyclin-dependent protein kinase activity	2	34	53	91.54	2.35
biological_process	GO:0030819	positive regulation of cAMP biosynthetic process	2	34	53	91.54	2.35
molecular_function	GO:0046872	metal ion binding	3	83	53	56.25	2.26
biological_process	GO:0045595	regulation of cell differentiation	2	39	53	79.81	2.22
biological_process	GO:0000080	G1 phase of mitotic cell cycle	2	43	53	72.38	2.13
biological_process	GO:0016525	negative regulation of angiogenesis	3	102	53	45.77	1.97
biological_process	GO:0009611	response to wounding	2	54	53	57.64	1.9
molecular_function	GO:0097063	cadmium ion sensor activity	1	1	53	1556.26	1.89
molecular_function	GO:0030379	neurotensin receptor activity, non-G-protein coupled	1	1	53	1556.26	1.89
molecular_function	GO:0050692	DBD domain binding	1	1	53	1556.26	1.89
cellular_component	GO:0034752	cytosolic aryl hydrocarbon receptor complex	1	1	53	1556.26	1.89
biological_process	GO:0009786	regulation of asymmetric cell division	1	1	53	1556.26	1.89
biological_process	GO:0043697	cell dedifferentiation	1	1	53	1556.26	1.89
biological_process	GO:0060795	cell fate commitment involved in formation of primary germ layer	1	1	53	1556.26	1.89
biological_process	GO:0035188	hatching	1	1	53	1556.26	1.89
biological_process	GO:0045355	negative regulation of interferon-alpha biosynthetic process	1	1	53	1556.26	1.89
biological_process	GO:0090081	regulation of heart induction by regulation of canonical Wnt receptor signaling pathway	1	1	53	1556.26	1.89
biological_process	GO:0051541	elastin metabolic process	1	1	53	1556.26	1.89
biological_process	GO:0032509	endosome transport via multivesicular body sorting pathway	1	1	53	1556.26	1.89
biological_process	GO:0046619	optic placode formation involved in camera-type eye formation	1	1	53	1556.26	1.89
biological_process	GO:0042063	gliogenesis	1	1	53	1556.26	1.89
biological_process	GO:0010692	regulation of alkaline phosphatase activity	1	1	53	1556.26	1.89
biological_process	GO:0034645	cellular macromolecule biosynthetic process	1	1	53	1556.26	1.89
biological_process	GO:0090308	regulation of methylation-dependent chromatin silencing	1	1	53	1556.26	1.89
biological_process	GO:0010573	vascular endothelial growth factor production	1	1	53	1556.26	1.89
biological_process	GO:2000979	positive regulation of forebrain neuron differentiation	1	1	53	1556.26	1.89
biological_process	GO:0010755	regulation of plasminogen activation	1	1	53	1556.26	1.89
biological_process	GO:0060414	aorta smooth muscle tissue morphogenesis	1	2	53	778.13	1.85
biological_process	GO:0046886	positive regulation of hormone biosynthetic process	1	2	53	778.13	1.85
biological_process	GO:0045191	regulation of isotype switching	1	2	53	778.13	1.85
biological_process	GO:0010288	response to lead ion	1	2	53	778.13	1.85
biological_process	GO:0070858	negative regulation of bile acid biosynthetic process	1	2	53	778.13	1.85
biological_process	GO:0021707	cerebellar granule cell differentiation	1	2	53	778.13	1.85
biological_process	GO:0060741	prostate gland stromal morphogenesis	1	2	53	778.13	1.85
biological_process	GO:0060849	regulation of transcription involved in lymphatic endothelial cell fate commitment	1	2	53	778.13	1.85
biological_process	GO:0010971	positive regulation of G2/M transition of mitotic cell cycle	1	2	53	778.13	1.85
biological_process	GO:0048227	plasma membrane to endosome transport	1	2	53	778.13	1.85
biological_process	GO:0070101	positive regulation of chemokine-mediated signaling pathway	1	2	53	778.13	1.85
molecular_function	GO:0044212	transcription regulatory region DNA binding	6	279	53	33.47	1.84
biological_process	GO:0030097	hemopoiesis	2	58	53	53.66	1.83
molecular_function	GO:0010465	nerve growth factor receptor activity	1	3	53	518.75	1.82
molecular_function	GO:0070123	transforming growth factor beta receptor activity, type III	1	3	53	518.75	1.82
molecular_function	GO:0071535	RING-like zinc finger domain binding	1	3	53	518.75	1.82
biological_process	GO:0045646	regulation of erythrocyte differentiation	1	3	53	518.75	1.82
biological_process	GO:0048845	venous blood vessel morphogenesis	1	3	53	518.75	1.82
biological_process	GO:0030888	regulation of B cell proliferation	1	3	53	518.75	1.82
biological_process	GO:2000179	positive regulation of neural precursor cell proliferation	1	3	53	518.75	1.82
biological_process	GO:0045347	negative regulation of MHC class II biosynthetic process	1	3	53	518.75	1.82
biological_process	GO:0008628	hormone-mediated apoptotic signaling pathway	1	3	53	518.75	1.82
biological_process	GO:0060965	negative regulation of gene silencing by miRNA	1	3	53	518.75	1.82
biological_process	GO:0061419	positive regulation of transcription from RNA polymerase II promoter in response to hypoxia	1	3	53	518.75	1.82
biological_process	GO:2000773	negative regulation of cellular senescence	1	3	53	518.75	1.82
biological_process	GO:0045669	positive regulation of osteoblast differentiation	2	60	53	51.88	1.8
molecular_function	GO:0050693	LBD domain binding	1	4	53	389.07	1.79
molecular_function	GO:0005141	interleukin-10 receptor binding	1	4	53	389.07	1.79
biological_process	GO:0060214	endocardium formation	1	4	53	389.07	1.79
biological_process	GO:0021781	glial cell fate commitment	1	4	53	389.07	1.79
biological_process	GO:0060298	positive regulation of sarcomere organization	1	4	53	389.07	1.79
biological_process	GO:0030910	olfactory placode formation	1	4	53	389.07	1.79
biological_process	GO:0060913	cardiac cell fate determination	1	4	53	389.07	1.79
biological_process	GO:0030730	sequestering of triglyceride	1	4	53	389.07	1.79
biological_process	GO:0043619	regulation of transcription from RNA polymerase II promoter in response to oxidative stress	1	4	53	389.07	1.79
biological_process	GO:0032909	regulation of transforming growth factor beta2 production	1	4	53	389.07	1.79
biological_process	GO:0014902	myotube differentiation	1	4	53	389.07	1.79
biological_process	GO:0048568	embryonic organ development	1	4	53	389.07	1.79
biological_process	GO:0042092	type 2 immune response	1	4	53	389.07	1.79
biological_process	GO:0046323	glucose import	1	4	53	389.07	1.79
biological_process	GO:0043281	regulation of cysteine-type endopeptidase activity involved in apoptotic process	1	4	53	389.07	1.79
biological_process	GO:0070309	lens fiber cell morphogenesis	1	4	53	389.07	1.79
biological_process	GO:0010717	regulation of epithelial to mesenchymal transition	1	4	53	389.07	1.79
biological_process	GO:0045893	positive regulation of transcription, DNA-dependent	19	1033	53	28.62	1.78
molecular_function	GO:0005025	transforming growth factor beta receptor activity, type I	1	5	53	311.25	1.75
molecular_function	GO:0048406	nerve growth factor binding	1	5	53	311.25	1.75
biological_process	GO:0021516	dorsal spinal cord development	1	5	53	311.25	1.75
biological_process	GO:0051005	negative regulation of lipoprotein lipase activity	1	5	53	311.25	1.75
biological_process	GO:0060042	retina morphogenesis in camera-type eye	1	5	53	311.25	1.75
biological_process	GO:0060836	lymphatic endothelial cell differentiation	1	5	53	311.25	1.75
biological_process	GO:0003323	type B pancreatic cell development	1	5	53	311.25	1.75
biological_process	GO:0007253	cytoplasmic sequestering of NF-kappaB	1	5	53	311.25	1.75
cellular_component	GO:0044428	nuclear part	1	6	53	259.38	1.72
biological_process	GO:0021522	spinal cord motor neuron differentiation	1	6	53	259.38	1.72
biological_process	GO:0032364	oxygen homeostasis	1	6	53	259.38	1.72
biological_process	GO:0060421	positive regulation of heart growth	1	6	53	259.38	1.72
biological_process	GO:0021983	pituitary gland development	1	6	53	259.38	1.72
biological_process	GO:0042128	nitrate assimilation	1	6	53	259.38	1.72
biological_process	GO:0055005	ventricular cardiac myofibril development	1	6	53	259.38	1.72
biological_process	GO:0001938	positive regulation of endothelial cell proliferation	3	125	53	37.35	1.71
molecular_function	GO:0032791	lead ion binding	1	7	53	222.32	1.69
biological_process	GO:0010870	positive regulation of receptor biosynthetic process	1	7	53	222.32	1.69
biological_process	GO:0032963	collagen metabolic process	1	7	53	222.32	1.69
biological_process	GO:0021517	ventral spinal cord development	1	7	53	222.32	1.69
biological_process	GO:0001837	epithelial to mesenchymal transition	2	68	53	45.77	1.68
biological_process	GO:0002248	connective tissue replacement involved in inflammatory response wound healing	1	8	53	194.53	1.67
biological_process	GO:0070365	hepatocyte differentiation	1	8	53	194.53	1.67
biological_process	GO:0002119	nematode larval development	1	8	53	194.53	1.67
biological_process	GO:0050832	defense response to fungus	3	130	53	35.91	1.67
biological_process	GO:0050680	negative regulation of epithelial cell proliferation	2	70	53	44.46	1.65
molecular_function	GO:0034713	type I transforming growth factor beta receptor binding	1	9	53	172.92	1.64
biological_process	GO:0007379	segment specification	1	9	53	172.92	1.64
biological_process	GO:0035413	positive regulation of catenin import into nucleus	1	9	53	172.92	1.64
biological_process	GO:0055009	atrial cardiac muscle tissue morphogenesis	1	10	53	155.63	1.61
biological_process	GO:0032868	response to insulin stimulus	1	10	53	155.63	1.61
biological_process	GO:0070848	response to growth factor stimulus	1	10	53	155.63	1.61
biological_process	GO:0032722	positive regulation of chemokine production	1	10	53	155.63	1.61
biological_process	GO:0030240	skeletal muscle thin filament assembly	1	10	53	155.63	1.61
biological_process	GO:0016050	vesicle organization	1	10	53	155.63	1.61
biological_process	GO:0021670	lateral ventricle development	1	10	53	155.63	1.61
biological_process	GO:0031016	pancreas development	1	11	53	141.48	1.59
biological_process	GO:0000003	reproduction	1	11	53	141.48	1.59
biological_process	GO:0043049	otic placode formation	1	11	53	141.48	1.59
biological_process	GO:0046686	response to cadmium ion	1	11	53	141.48	1.59
biological_process	GO:0019896	axon transport of mitochondrion	1	11	53	141.48	1.59
biological_process	GO:0001824	blastocyst development	1	11	53	141.48	1.59
biological_process	GO:0007507	heart development	3	140	53	33.35	1.58
molecular_function	GO:0030332	cyclin binding	1	12	53	129.69	1.56
biological_process	GO:0006895	Golgi to endosome transport	1	12	53	129.69	1.56
biological_process	GO:0045445	myoblast differentiation	1	12	53	129.69	1.56
biological_process	GO:0045596	negative regulation of cell differentiation	1	12	53	129.69	1.56
biological_process	GO:0014002	astrocyte development	1	12	53	129.69	1.56
biological_process	GO:2000145	regulation of cell motility	1	13	53	119.71	1.54
biological_process	GO:0001954	positive regulation of cell-matrix adhesion	1	13	53	119.71	1.54
molecular_function	GO:0035257	nuclear hormone receptor binding	1	14	53	111.16	1.52
biological_process	GO:0030595	leukocyte chemotaxis	1	14	53	111.16	1.52
biological_process	GO:0051443	positive regulation of ubiquitin-protein ligase activity	1	14	53	111.16	1.52
biological_process	GO:0045821	positive regulation of glycolysis	1	14	53	111.16	1.52
biological_process	GO:0045453	bone resorption	1	15	53	103.75	1.49
biological_process	GO:0021915	neural tube development	1	15	53	103.75	1.49
biological_process	GO:0060391	positive regulation of SMAD protein import into nucleus	1	15	53	103.75	1.49
molecular_function	GO:0008201	heparin binding	3	152	53	30.72	1.49
molecular_function	GO:0005539	glycosaminoglycan binding	1	16	53	97.27	1.47
molecular_function	GO:0016922	ligand-dependent nuclear receptor binding	1	16	53	97.27	1.47
biological_process	GO:0048839	inner ear development	1	16	53	97.27	1.47
biological_process	GO:0001946	lymphangiogenesis	1	16	53	97.27	1.47
biological_process	GO:0060412	ventricular septum morphogenesis	1	16	53	97.27	1.47
molecular_function	GO:0046870	cadmium ion binding	1	17	53	91.54	1.45
biological_process	GO:0019915	lipid storage	1	17	53	91.54	1.45
biological_process	GO:0010575	positive regulation vascular endothelial growth factor production	1	17	53	91.54	1.45
biological_process	GO:0009410	response to xenobiotic stimulus	1	17	53	91.54	1.45
biological_process	GO:0003130	BMP signaling pathway involved in heart induction	1	18	53	86.46	1.43
biological_process	GO:0045750	positive regulation of S phase of mitotic cell cycle	1	18	53	86.46	1.43
biological_process	GO:0040018	positive regulation of multicellular organism growth	1	18	53	86.46	1.43
biological_process	GO:0045184	establishment of protein localization	1	18	53	86.46	1.43
biological_process	GO:0040010	positive regulation of growth rate	1	19	53	81.91	1.41
biological_process	GO:0042730	fibrinolysis	1	19	53	81.91	1.41
biological_process	GO:0032331	negative regulation of chondrocyte differentiation	1	19	53	81.91	1.41
biological_process	GO:0048566	embryonic digestive tract development	1	19	53	81.91	1.41
biological_process	GO:0048699	generation of neurons	1	20	53	77.81	1.39
cellular_component	GO:0035102	PRC1 complex	1	21	53	74.11	1.37
biological_process	GO:0051000	positive regulation of nitric-oxide synthase activity	1	21	53	74.11	1.37
biological_process	GO:0030900	forebrain development	1	21	53	74.11	1.37
biological_process	GO:0002904	positive regulation of B cell apoptotic process	1	22	53	70.74	1.35
molecular_function	GO:0003705	RNA polymerase II distal enhancer sequence-specific DNA binding transcription factor activity	3	174	53	26.83	1.34
biological_process	GO:0045892	negative regulation of transcription, DNA-dependent	12	857	53	21.79	1.34
biological_process	GO:0045668	negative regulation of osteoblast differentiation	1	23	53	67.66	1.33
biological_process	GO:0009792	embryo development ending in birth or egg hatching	1	23	53	67.66	1.33
biological_process	GO:0040011	locomotion	1	23	53	67.66	1.33
biological_process	GO:0045638	negative regulation of myeloid cell differentiation	1	24	53	64.84	1.32
biological_process	GO:0032800	receptor biosynthetic process	1	24	53	64.84	1.32
biological_process	GO:0051045	negative regulation of membrane protein ectodomain proteolysis	1	25	53	62.25	1.3
biological_process	GO:0000082	G1/S transition of mitotic cell cycle	3	181	53	25.79	1.3
cellular_component	GO:0005905	coated pit	1	26	53	59.86	1.28
biological_process	GO:0036166	phenotypic switching	1	26	53	59.86	1.28
biological_process	GO:0061418	regulation of transcription from RNA polymerase II promoter in response to hypoxia	1	26	53	59.86	1.28
molecular_function	GO:0005057	receptor signaling protein activity	1	27	53	57.64	1.27
biological_process	GO:0030889	negative regulation of B cell proliferation	1	27	53	57.64	1.27
biological_process	GO:0045737	positive regulation of cyclin-dependent protein kinase activity	1	27	53	57.64	1.27
biological_process	GO:0002088	lens development in camera-type eye	1	27	53	57.64	1.27
biological_process	GO:0071236	cellular response to antibiotic	1	27	53	57.64	1.27
biological_process	GO:0006325	chromatin organization	1	27	53	57.64	1.27
biological_process	GO:0001568	blood vessel development	1	27	53	57.64	1.27
biological_process	GO:0001501	skeletal system development	2	107	53	29.09	1.27
biological_process	GO:0030335	positive regulation of cell migration	3	188	53	24.83	1.26
biological_process	GO:0030163	protein catabolic process	1	28	53	55.58	1.25
biological_process	GO:0045648	positive regulation of erythrocyte differentiation	1	28	53	55.58	1.25
molecular_function	GO:0035035	histone acetyltransferase binding	1	29	53	53.66	1.23
biological_process	GO:0042100	B cell proliferation	1	29	53	53.66	1.23
biological_process	GO:0042130	negative regulation of T cell proliferation	1	30	53	51.88	1.22
biological_process	GO:0002740	negative regulation of cytokine secretion involved in immune response	1	30	53	51.88	1.22
biological_process	GO:0003007	heart morphogenesis	1	30	53	51.88	1.22
biological_process	GO:0002237	response to molecule of bacterial origin	1	30	53	51.88	1.22
biological_process	GO:0010718	positive regulation of epithelial to mesenchymal transition	1	30	53	51.88	1.22
biological_process	GO:0051384	response to glucocorticoid stimulus	1	30	53	51.88	1.22
biological_process	GO:0001775	cell activation	1	31	53	50.2	1.2
biological_process	GO:0008285	negative regulation of cell proliferation	6	459	53	20.34	1.19
cellular_component	GO:0005667	transcription factor complex	4	294	53	21.17	1.17
biological_process	GO:0001701	in utero embryonic development	1	34	53	45.77	1.16
biological_process	GO:0055010	ventricular cardiac muscle tissue morphogenesis	1	34	53	45.77	1.16
biological_process	GO:0000077	DNA damage checkpoint	1	35	53	44.46	1.15
biological_process	GO:0040014	regulation of multicellular organism growth	1	35	53	44.46	1.15
biological_process	GO:0010033	response to organic substance	1	35	53	44.46	1.15
biological_process	GO:0032715	negative regulation of interleukin-6 production	1	36	53	43.23	1.14
biological_process	GO:0007189	adenylate cyclase-activating G-protein coupled receptor signaling pathway	1	36	53	43.23	1.14
biological_process	GO:0010043	response to zinc ion	1	36	53	43.23	1.14
biological_process	GO:0045725	positive regulation of glycogen biosynthetic process	1	36	53	43.23	1.14
biological_process	GO:0030949	positive regulation of vascular endothelial growth factor receptor signaling pathway	1	37	53	42.06	1.12
molecular_function	GO:0003680	AT DNA binding	1	40	53	38.91	1.09
cellular_component	GO:0005635	nuclear envelope	2	134	53	23.23	1.08
biological_process	GO:0010628	positive regulation of gene expression	3	231	53	20.21	1.07
biological_process	GO:0008333	endosome to lysosome transport	1	42	53	37.05	1.06
biological_process	GO:0097190	apoptotic signaling pathway	1	42	53	37.05	1.06
biological_process	GO:0045787	positive regulation of cell cycle	1	43	53	36.19	1.05
biological_process	GO:0030168	platelet activation	3	237	53	19.7	1.05
biological_process	GO:0071222	cellular response to lipopolysaccharide	1	44	53	35.37	1.04
molecular_function	GO:0000981	sequence-specific DNA binding RNA polymerase II transcription factor activity	1	45	53	34.58	1.03
molecular_function	GO:0019899	enzyme binding	3	241	53	19.37	1.03
biological_process	GO:0045071	negative regulation of viral genome replication	1	46	53	33.83	1.02
biological_process	GO:0030183	B cell differentiation	1	46	53	33.83	1.02
cellular_component	GO:0031093	platelet alpha granule lumen	1	47	53	33.11	1.01
biological_process	GO:0007050	cell cycle arrest	2	148	53	21.03	1.01
biological_process	GO:0009790	embryo development	3	248	53	18.83	1.01
biological_process	GO:0008340	determination of adult lifespan	1	48	53	32.42	1
biological_process	GO:0050715	positive regulation of cytokine secretion	1	49	53	31.76	0.99
biological_process	GO:0046326	positive regulation of glucose import	1	50	53	31.13	0.98
molecular_function	GO:0031625	ubiquitin protein ligase binding	2	154	53	20.21	0.98
molecular_function	GO:0004879	ligand-activated sequence-specific DNA binding RNA polymerase II transcription factor activity	1	51	53	30.51	0.97
biological_process	GO:0030308	negative regulation of cell growth	3	260	53	17.96	0.97
cellular_component	GO:0031519	PcG protein complex	1	52	53	29.93	0.96
biological_process	GO:0016477	cell migration	2	159	53	19.58	0.95
molecular_function	GO:0020037	heme binding	3	265	53	17.62	0.95
biological_process	GO:0007399	nervous system development	3	266	53	17.55	0.95
biological_process	GO:0043065	positive regulation of apoptotic process	3	266	53	17.55	0.95
biological_process	GO:0030522	intracellular receptor mediated signaling pathway	1	54	53	28.82	0.94
biological_process	GO:0007049	cell cycle	1	55	53	28.3	0.93
cellular_component	GO:0030136	clathrin-coated vesicle	1	56	53	27.79	0.93
molecular_function	GO:0042277	peptide binding	1	57	53	27.3	0.92
biological_process	GO:0045665	negative regulation of neuron differentiation	1	59	53	26.38	0.9
biological_process	GO:0010595	positive regulation of endothelial cell migration	1	60	53	25.94	0.89
biological_process	GO:0030154	cell differentiation	1	60	53	25.94	0.89
cellular_component	GO:0016023	cytoplasmic membrane-bounded vesicle	1	62	53	25.1	0.88
biological_process	GO:0009887	organ morphogenesis	1	63	53	24.7	0.87
biological_process	GO:0051260	protein homooligomerization	2	178	53	17.49	0.87
biological_process	GO:0010634	positive regulation of epithelial cell migration	1	64	53	24.32	0.86
biological_process	GO:0007565	female pregnancy	1	66	53	23.58	0.85
molecular_function	GO:0003677	DNA binding	8	893	53	13.94	0.85
biological_process	GO:0071347	cellular response to interleukin-1	1	69	53	22.55	0.83
cellular_component	GO:0000151	ubiquitin ligase complex	1	70	53	22.23	0.82
biological_process	GO:0033554	cellular response to stress	1	70	53	22.23	0.82
biological_process	GO:0007218	neuropeptide signaling pathway	1	70	53	22.23	0.82
biological_process	GO:0001649	osteoblast differentiation	1	74	53	21.03	0.79
biological_process	GO:0006898	receptor-mediated endocytosis	1	76	53	20.48	0.78
biological_process	GO:0071493	cellular response to UV-B	1	76	53	20.48	0.78
molecular_function	GO:0003713	transcription coactivator activity	3	333	53	14.02	0.78
biological_process	GO:0010923	negative regulation of phosphatase activity	1	78	53	19.95	0.77
biological_process	GO:0008544	epidermis development	1	78	53	19.95	0.77
cellular_component	GO:0001726	ruffle	1	79	53	19.7	0.76
biological_process	GO:0043433	negative regulation of sequence-specific DNA binding transcription factor activity	1	80	53	19.45	0.76
biological_process	GO:0002576	platelet degranulation	1	80	53	19.45	0.76
biological_process	GO:0008406	gonad development	1	80	53	19.45	0.76
molecular_function	GO:0003700	sequence-specific DNA binding transcription factor activity	9	1142	53	12.26	0.76
molecular_function	GO:0047485	protein N-terminus binding	1	85	53	18.31	0.73
biological_process	GO:0008283	cell proliferation	3	365	53	12.79	0.72
molecular_function	GO:0043565	sequence-specific DNA binding	3	368	53	12.69	0.72
molecular_function	GO:0008270	zinc ion binding	5	658	53	11.83	0.71
biological_process	GO:0006874	cellular calcium ion homeostasis	1	90	53	17.29	0.7
molecular_function	GO:0005125	cytokine activity	1	91	53	17.1	0.7
biological_process	GO:0045786	negative regulation of cell cycle	1	91	53	17.1	0.7
biological_process	GO:0043410	positive regulation of MAPK cascade	1	95	53	16.38	0.68
biological_process	GO:0010629	negative regulation of gene expression	1	97	53	16.04	0.67
molecular_function	GO:0008134	transcription factor binding	3	398	53	11.73	0.67
biological_process	GO:0006897	endocytosis	1	100	53	15.56	0.66
biological_process	GO:0071456	cellular response to hypoxia	1	103	53	15.11	0.65
molecular_function	GO:0008083	growth factor activity	1	105	53	14.82	0.64
biological_process	GO:0006355	regulation of transcription, DNA-dependent	7	1046	53	10.41	0.64
molecular_function	GO:0042393	histone binding	1	107	53	14.54	0.63
biological_process	GO:0051091	positive regulation of sequence-specific DNA binding transcription factor activity	1	108	53	14.41	0.62
cellular_component	GO:0009897	external side of plasma membrane	1	111	53	14.02	0.61
biological_process	GO:0006915	apoptotic process	3	443	53	10.54	0.61
biological_process	GO:0000122	negative regulation of transcription from RNA polymerase II promoter	4	602	53	10.34	0.61
biological_process	GO:0007219	Notch signaling pathway	1	114	53	13.65	0.6
molecular_function	GO:0046982	protein heterodimerization activity	2	294	53	10.59	0.58
biological_process	GO:0040007	growth	4	637	53	9.77	0.58
cellular_component	GO:0000785	chromatin	1	123	53	12.65	0.57
biological_process	GO:0090090	negative regulation of canonical Wnt receptor signaling pathway	1	125	53	12.45	0.56
biological_process	GO:0000084	S phase of mitotic cell cycle	1	132	53	11.79	0.54
biological_process	GO:0000278	mitotic cell cycle	2	321	53	9.7	0.54
biological_process	GO:0045944	positive regulation of transcription from RNA polymerase II promoter	5	904	53	8.61	0.53
cellular_component	GO:0005777	peroxisome	1	144	53	10.81	0.51
biological_process	GO:0006950	response to stress	1	148	53	10.52	0.5
biological_process	GO:0007186	G-protein coupled receptor signaling pathway	2	359	53	8.67	0.49
cellular_component	GO:0005618	cell wall	4	788	53	7.9	0.48
molecular_function	GO:0008022	protein C-terminus binding	1	159	53	9.79	0.47
biological_process	GO:0006629	lipid metabolic process	1	160	53	9.73	0.47
biological_process	GO:0009615	response to virus	1	163	53	9.55	0.47
cellular_component	GO:0048471	perinuclear region of cytoplasm	3	592	53	7.89	0.47
biological_process	GO:0006805	xenobiotic metabolic process	1	168	53	9.26	0.45
biological_process	GO:0006979	response to oxidative stress	1	169	53	9.21	0.45
molecular_function	GO:0008301	DNA binding, bending	1	170	53	9.15	0.45
molecular_function	GO:0046983	protein dimerization activity	1	176	53	8.84	0.44
biological_process	GO:0007420	brain development	1	193	53	8.06	0.41
biological_process	GO:0045766	positive regulation of angiogenesis	1	195	53	7.98	0.4
cellular_component	GO:0005769	early endosome	1	196	53	7.94	0.4
cellular_component	GO:0031965	nuclear membrane	1	199	53	7.82	0.4
biological_process	GO:0008284	positive regulation of cell proliferation	2	462	53	6.74	0.39
biological_process	GO:0001666	response to hypoxia	1	208	53	7.48	0.38
biological_process	GO:0042493	response to drug	1	220	53	7.07	0.37
biological_process	GO:0048011	nerve growth factor receptor signaling pathway	1	220	53	7.07	0.37
molecular_function	GO:0042802	identical protein binding	2	504	53	6.18	0.36
molecular_function	GO:0005524	ATP binding	2	525	53	5.93	0.35
cellular_component	GO:0005768	endosome	1	240	53	6.48	0.34
biological_process	GO:0006468	protein phosphorylation	2	532	53	5.85	0.34
cellular_component	GO:0005634	nucleus	24	6934	53	5.39	0.34
biological_process	GO:0006954	inflammatory response	1	267	53	5.83	0.31
cellular_component	GO:0005654	nucleoplasm	4	1255	53	4.96	0.31
molecular_function	GO:0019901	protein kinase binding	1	276	53	5.64	0.3
biological_process	GO:0009405	pathogenesis	2	675	53	4.61	0.28
biological_process	GO:0006281	DNA repair	1	325	53	4.79	0.27
biological_process	GO:0043066	negative regulation of apoptotic process	2	688	53	4.52	0.27
biological_process	GO:0006357	regulation of transcription from RNA polymerase II promoter	1	326	53	4.77	0.26
molecular_function	GO:0005515	protein binding	18	7000	53	4	0.26
cellular_component	GO:0005730	nucleolus	7	2746	53	3.97	0.25
biological_process	GO:0006508	proteolysis	1	371	53	4.19	0.24
cellular_component	GO:0005794	Golgi apparatus	2	830	53	3.75	0.23
biological_process	GO:0006955	immune response	1	401	53	3.88	0.22
biological_process	GO:0007596	blood coagulation	1	446	53	3.49	0.2
cellular_component	GO:0005615	extracellular space	2	1102	53	2.82	0.17
cellular_component	GO:0005737	cytoplasm	11	6369	53	2.69	0.17
cellular_component	GO:0009986	cell surface	1	587	53	2.65	0.16
molecular_function	GO:0042803	protein homodimerization activity	2	1180	53	2.64	0.16
cellular_component	GO:0005829	cytosol	6	3778	53	2.47	0.16
cellular_component	GO:0005886	plasma membrane	7	5448	53	2	0.13
cellular_component	GO:0005576	extracellular region	3	2335	53	2	0.13
cellular_component	GO:0016020	membrane	1	941	53	1.65	0.1
biological_process	GO:0007165	signal transduction	1	958	53	1.62	0.1
cellular_component	GO:0016021	integral to membrane	1	1034	53	1.51	0.09
cellular_component	GO:0005887	integral to plasma membrane	1	1324	53	1.18	0.07

## Sheet: parchild_list
Namespace	GO_ID	GO_Name	Together	TermCount	SubjectCount	Score(PR)	Score(S%)
biological_process	GO:0006355	regulation of transcription, DNA-dependent	470	1046	53	34.6	28.54
molecular_function	GO:0003700	sequence-specific DNA binding transcription factor activity	402	1142	53	27.11	22.2
biological_process	GO:0045893	positive regulation of transcription, DNA-dependent	115	1033	53	8.57	5.78
biological_process	GO:0045892	negative regulation of transcription, DNA-dependent	105	857	53	9.44	5.76
biological_process	GO:0006446	regulation of translational initiation	62	125	53	38.2	5.47
molecular_function	GO:0003677	DNA binding	100	893	53	8.62	5.36
molecular_function	GO:0003743	translation initiation factor activity	56	172	53	25.07	4.72
cellular_component	GO:0005852	eukaryotic translation initiation factor 3 complex	52	120	53	33.37	4.57
biological_process	GO:0000122	negative regulation of transcription from RNA polymerase II promoter	64	602	53	8.19	3.98
biological_process	GO:0006357	regulation of transcription from RNA polymerase II promoter	53	326	53	12.52	3.94
cellular_component	GO:0005634	nucleus	302	6934	53	3.35	3.92
molecular_function	GO:0043565	sequence-specific DNA binding	37	368	53	7.74	2.64
biological_process	GO:0045944	positive regulation of transcription from RNA polymerase II promoter	41	904	53	3.49	2.12
cellular_component	GO:0005667	transcription factor complex	26	294	53	6.81	1.94
cellular_component	GO:0005730	nucleolus	67	2746	53	1.88	1.79
molecular_function	GO:0003714	transcription corepressor activity	21	199	53	8.13	1.68
molecular_function	GO:0008270	zinc ion binding	28	658	53	3.28	1.65
molecular_function	GO:0003713	transcription coactivator activity	22	333	53	5.09	1.59
cellular_component	GO:0030529	ribonucleoprotein complex	18	147	53	9.43	1.5
biological_process	GO:0031053	primary miRNA processing	16	27	53	45.64	1.48
cellular_component	GO:0005654	nucleoplasm	34	1255	53	2.09	1.48
molecular_function	GO:0044212	transcription regulatory region DNA binding	19	279	53	5.24	1.43
molecular_function	GO:0005515	protein binding	112	7000	53	1.23	1.41
biological_process	GO:0016246	RNA interference	15	18	53	64.18	1.4
cellular_component	GO:0005737	cytoplasm	101	6369	53	1.22	1.38
biological_process	GO:0043484	regulation of RNA splicing	15	37	53	31.22	1.37
biological_process	GO:0017148	negative regulation of translation	15	74	53	15.61	1.33
molecular_function	GO:0008134	transcription factor binding	18	398	53	3.48	1.24
biological_process	GO:0045013	carbon catabolite repression of transcription	13	25	53	40.05	1.2
molecular_function	GO:0001071	nucleic acid binding transcription factor activity	13	42	53	23.84	1.18
molecular_function	GO:0046982	protein heterodimerization activity	14	294	53	3.67	1.04
molecular_function	GO:0003723	RNA binding	15	415	53	2.78	1.02
cellular_component	GO:0008023	transcription elongation factor complex	11	25	53	33.89	1.01
cellular_component	GO:0000790	nuclear chromatin	12	125	53	7.39	1.01
molecular_function	GO:0008607	phosphorylase kinase regulator activity	10	16	53	48.13	0.93
biological_process	GO:0045947	negative regulation of translational initiation	10	32	53	24.07	0.91
biological_process	GO:0051090	regulation of sequence-specific DNA binding transcription factor activity	10	145	53	5.31	0.83
molecular_function	GO:0003705	RNA polymerase II distal enhancer sequence-specific DNA binding transcription factor activity	10	174	53	4.43	0.81
molecular_function	GO:0042803	protein homodimerization activity	18	1180	53	1.17	0.81
cellular_component	GO:0017053	transcriptional repressor complex	9	59	53	11.75	0.8
molecular_function	GO:0003729	mRNA binding	9	107	53	6.48	0.77
molecular_function	GO:0035438	cyclic-di-GMP binding	8	8	53	77.01	0.75
molecular_function	GO:0002161	aminoacyl-tRNA editing activity	8	9	53	68.46	0.75
biological_process	GO:0006450	regulation of translational fidelity	8	10	53	61.61	0.75
biological_process	GO:0050821	protein stabilization	9	139	53	4.99	0.75
cellular_component	GO:0016442	RNA-induced silencing complex	8	16	53	38.51	0.74
molecular_function	GO:0030371	translation repressor activity	8	19	53	32.43	0.74
biological_process	GO:0031054	pre-miRNA processing	8	20	53	30.81	0.74
biological_process	GO:0032922	circadian regulation of gene expression	8	23	53	26.79	0.74
cellular_component	GO:0016592	mediator complex	8	46	53	13.39	0.72
molecular_function	GO:0003682	chromatin binding	10	333	53	2.31	0.72
molecular_function	GO:0000975	regulatory region DNA binding	7	15	53	35.94	0.65
biological_process	GO:0048026	positive regulation of mRNA splicing, via spliceosome	7	17	53	31.71	0.65
biological_process	GO:0006306	DNA methylation	7	19	53	28.37	0.65
molecular_function	GO:0046983	protein dimerization activity	8	176	53	3.5	0.65
biological_process	GO:0080111	DNA demethylation	7	27	53	19.97	0.64
cellular_component	GO:0000124	SAGA complex	7	35	53	15.4	0.64
molecular_function	GO:0001104	RNA polymerase II transcription cofactor activity	7	40	53	13.48	0.63
molecular_function	GO:0003725	double-stranded RNA binding	7	49	53	11	0.63
molecular_function	GO:0003690	double-stranded DNA binding	8	234	53	2.63	0.62
molecular_function	GO:0005509	calcium ion binding	9	384	53	1.81	0.62
biological_process	GO:0035279	mRNA cleavage involved in gene silencing by miRNA	6	8	53	57.76	0.56
biological_process	GO:0030422	production of siRNA involved in RNA interference	6	12	53	38.51	0.56
cellular_component	GO:0005845	mRNA cap binding complex	6	33	53	14	0.55
cellular_component	GO:0016607	nuclear speck	6	102	53	4.53	0.51
biological_process	GO:0051091	positive regulation of sequence-specific DNA binding transcription factor activity	6	108	53	4.28	0.51
biological_process	GO:0042985	negative regulation of amyloid precursor protein biosynthetic process	5	7	53	55.01	0.47
molecular_function	GO:0003886	DNA (cytosine-5-)-methyltransferase activity	5	8	53	48.13	0.47
cellular_component	GO:0016281	eukaryotic translation initiation factor 4F complex	5	14	53	27.51	0.46
cellular_component	GO:0005844	polysome	5	16	53	24.07	0.46
cellular_component	GO:0030660	Golgi-associated vesicle membrane	5	20	53	19.25	0.46
biological_process	GO:0000083	regulation of transcription involved in G1/S phase of mitotic cell cycle	5	21	53	18.34	0.46
cellular_component	GO:0031301	integral to organelle membrane	5	24	53	16.04	0.46
molecular_function	GO:0000993	RNA polymerase II core binding	5	32	53	12.03	0.46
cellular_component	GO:0000118	histone deacetylase complex	5	33	53	11.67	0.45
molecular_function	GO:0008135	translation factor activity, nucleic acid binding	5	36	53	10.7	0.45
biological_process	GO:0006417	regulation of translation	5	41	53	9.39	0.45
cellular_component	GO:0031519	PcG protein complex	5	52	53	7.41	0.45
cellular_component	GO:0005739	mitochondrion	12	1662	53	0.56	0.44
molecular_function	GO:0042802	identical protein binding	6	504	53	0.92	0.38
molecular_function	GO:0070551	endoribonuclease activity, cleaving siRNA-paired mRNA	4	5	53	61.61	0.37
cellular_component	GO:0035068	micro-ribonucleoprotein complex	4	7	53	44.01	0.37
biological_process	GO:0070940	dephosphorylation of RNA polymerase II C-terminal domain	4	8	53	38.51	0.37
biological_process	GO:0050684	regulation of mRNA processing	4	8	53	38.51	0.37
cellular_component	GO:0016602	CCAAT-binding factor complex	4	9	53	34.23	0.37
biological_process	GO:0045943	positive regulation of transcription from RNA polymerase I promoter	4	9	53	34.23	0.37
biological_process	GO:0090310	negative regulation of methylation-dependent chromatin silencing	4	9	53	34.23	0.37
biological_process	GO:0030423	targeting of mRNA for destruction involved in RNA interference	4	14	53	22	0.37
molecular_function	GO:0070742	C2H2 zinc finger domain binding	4	17	53	18.12	0.37
molecular_function	GO:0035197	siRNA binding	4	17	53	18.12	0.37
molecular_function	GO:0000340	RNA 7-methylguanosine cap binding	4	19	53	16.21	0.37
biological_process	GO:0035278	negative regulation of translation involved in gene silencing by miRNA	4	20	53	15.4	0.37
cellular_component	GO:0035102	PRC1 complex	4	21	53	14.67	0.37
molecular_function	GO:0070491	repressing transcription factor binding	4	22	53	14	0.37
cellular_component	GO:0016591	DNA-directed RNA polymerase II, holoenzyme	4	24	53	12.84	0.37
cellular_component	GO:0000974	Prp19 complex	4	24	53	12.84	0.37
molecular_function	GO:0001106	RNA polymerase II transcription corepressor activity	4	31	53	9.94	0.36
biological_process	GO:0045727	positive regulation of translation	4	50	53	6.16	0.36
cellular_component	GO:0005622	intracellular	5	331	53	1.16	0.36
molecular_function	GO:0030374	ligand-dependent nuclear receptor transcription coactivator activity	4	64	53	4.81	0.35
molecular_function	GO:0035064	methylated histone residue binding	4	68	53	4.53	0.35
molecular_function	GO:0047485	protein N-terminus binding	4	85	53	3.62	0.35
biological_process	GO:0030509	BMP signaling pathway	4	89	53	3.46	0.35
molecular_function	GO:0019904	protein domain specific binding	4	111	53	2.78	0.34
cellular_component	GO:0000785	chromatin	4	123	53	2.5	0.34
cellular_component	GO:0043231	intracellular membrane-bounded organelle	5	661	53	0.58	0.29
molecular_function	GO:0043856	anti-sigma factor antagonist activity	3	4	53	57.76	0.28
biological_process	GO:0001514	selenocysteine incorporation	3	4	53	57.76	0.28
biological_process	GO:0090116	C-5 methylation of cytosine	3	4	53	57.76	0.28
biological_process	GO:0031937	positive regulation of chromatin silencing	3	5	53	46.21	0.28
biological_process	GO:0016480	negative regulation of transcription from RNA polymerase III promoter	3	5	53	46.21	0.28
biological_process	GO:0007221	positive regulation of transcription of Notch receptor target	3	6	53	38.51	0.28
biological_process	GO:0016458	gene silencing	3	7	53	33.01	0.28
molecular_function	GO:0017151	DEAD/H-box RNA helicase binding	3	8	53	28.88	0.28
molecular_function	GO:0004887	thyroid hormone receptor activity	3	8	53	28.88	0.28
molecular_function	GO:0048027	mRNA 5'-UTR binding	3	9	53	25.67	0.28
molecular_function	GO:0016989	sigma factor antagonist activity	3	10	53	23.1	0.28
molecular_function	GO:0030598	rRNA N-glycosylase activity	3	10	53	23.1	0.28
molecular_function	GO:0008494	translation activator activity	3	13	53	17.77	0.28
cellular_component	GO:0016581	NuRD complex	3	17	53	13.59	0.28
molecular_function	GO:0070324	thyroid hormone binding	3	20	53	11.55	0.28
biological_process	GO:0048025	negative regulation of mRNA splicing, via spliceosome	3	20	53	11.55	0.28
cellular_component	GO:0072669	tRNA-splicing ligase complex	3	21	53	11	0.28
cellular_component	GO:0016593	Cdc73/Paf1 complex	3	22	53	10.5	0.28
biological_process	GO:0032968	positive regulation of transcription elongation from RNA polymerase II promoter	3	22	53	10.5	0.28
cellular_component	GO:0005615	extracellular space	6	1102	53	0.42	0.28
molecular_function	GO:0003727	single-stranded RNA binding	3	31	53	7.45	0.27
biological_process	GO:0000381	regulation of alternative mRNA splicing, via spliceosome	3	40	53	5.78	0.27
biological_process	GO:0010468	regulation of gene expression	3	53	53	4.36	0.27
molecular_function	GO:0004003	ATP-dependent DNA helicase activity	3	54	53	4.28	0.27
molecular_function	GO:0043130	ubiquitin binding	3	62	53	3.73	0.27
cellular_component	GO:0005840	ribosome	3	69	53	3.35	0.26
biological_process	GO:0043433	negative regulation of sequence-specific DNA binding transcription factor activity	3	80	53	2.89	0.26
biological_process	GO:0010629	negative regulation of gene expression	3	97	53	2.38	0.26
molecular_function	GO:0042393	histone binding	3	107	53	2.16	0.26
cellular_component	GO:0005886	plasma membrane	17	5448	53	0.24	0.26
cellular_component	GO:0005925	focal adhesion	3	142	53	1.63	0.25
molecular_function	GO:0003697	single-stranded DNA binding	3	171	53	1.35	0.24
biological_process	GO:0010628	positive regulation of gene expression	3	231	53	1	0.23
cellular_component	GO:0015630	microtubule cytoskeleton	3	257	53	0.9	0.23
molecular_function	GO:0004674	protein serine/threonine kinase activity	3	348	53	0.66	0.21
cellular_component	GO:0005794	Golgi apparatus	4	830	53	0.37	0.21
molecular_function	GO:0009007	site-specific DNA-methyltransferase (adenine-specific) activity	2	2	53	77.01	0.19
molecular_function	GO:0045152	antisigma factor binding	2	2	53	77.01	0.19
biological_process	GO:0060965	negative regulation of gene silencing by miRNA	2	3	53	51.34	0.19
biological_process	GO:0007549	dosage compensation	2	3	53	51.34	0.19
biological_process	GO:0006449	regulation of translational termination	2	4	53	38.51	0.19
molecular_function	GO:0031370	eukaryotic initiation factor 4G binding	2	5	53	30.81	0.19
molecular_function	GO:0002151	G-quadruplex RNA binding	2	5	53	30.81	0.19
cellular_component	GO:0031618	nuclear centromeric heterochromatin	2	5	53	30.81	0.19
cellular_component	GO:0000779	condensed chromosome, centromeric region	2	6	53	25.67	0.19
cellular_component	GO:0000791	euchromatin	2	6	53	25.67	0.19
cellular_component	GO:0033553	rDNA heterochromatin	2	7	53	22	0.19
biological_process	GO:0070934	CRD-mediated mRNA stabilization	2	7	53	22	0.19
molecular_function	GO:0008327	methyl-CpG binding	2	8	53	19.25	0.19
cellular_component	GO:0005677	chromatin silencing complex	2	9	53	17.11	0.19
cellular_component	GO:0071204	histone pre-mRNA 3'end processing complex	2	9	53	17.11	0.19
biological_process	GO:0048096	chromatin-mediated maintenance of transcription	2	9	53	17.11	0.19
biological_process	GO:0010216	maintenance of DNA methylation	2	9	53	17.11	0.19
biological_process	GO:0006359	regulation of transcription from RNA polymerase III promoter	2	9	53	17.11	0.19
biological_process	GO:0060212	negative regulation of nuclear-transcribed mRNA poly(A) tail shortening	2	9	53	17.11	0.19
biological_process	GO:0000183	chromatin silencing at rDNA	2	10	53	15.4	0.19
molecular_function	GO:0030274	LIM domain binding	2	11	53	14	0.19
biological_process	GO:0006349	regulation of gene expression by genetic imprinting	2	12	53	12.84	0.19
biological_process	GO:0045948	positive regulation of translational initiation	2	13	53	11.85	0.18
cellular_component	GO:0005719	nuclear euchromatin	2	14	53	11	0.18
cellular_component	GO:0016580	Sin3 complex	2	15	53	10.27	0.18
molecular_function	GO:0046965	retinoid X receptor binding	2	16	53	9.63	0.18
molecular_function	GO:0017091	AU-rich element binding	2	17	53	9.06	0.18
molecular_function	GO:0043024	ribosomal small subunit binding	2	17	53	9.06	0.18
cellular_component	GO:0005720	nuclear heterochromatin	2	19	53	8.11	0.18
biological_process	GO:0048255	mRNA stabilization	2	24	53	6.42	0.18
biological_process	GO:0031647	regulation of protein stability	2	31	53	4.97	0.18
molecular_function	GO:0008143	poly(A) RNA binding	2	32	53	4.81	0.18
cellular_component	GO:0035098	ESC/E(Z) complex	2	38	53	4.05	0.18
molecular_function	GO:0003730	mRNA 3'-UTR binding	2	50	53	3.08	0.18
molecular_function	GO:0004879	ligand-activated sequence-specific DNA binding RNA polymerase II transcription factor activity	2	51	53	3.02	0.18
cellular_component	GO:0016363	nuclear matrix	2	52	53	2.96	0.18
cellular_component	GO:0000932	cytoplasmic mRNA processing body	2	52	53	2.96	0.18
molecular_function	GO:0046966	thyroid hormone receptor binding	2	53	53	2.91	0.18
cellular_component	GO:0010494	cytoplasmic stress granule	2	55	53	2.8	0.18
molecular_function	GO:0043621	protein self-association	2	60	53	2.57	0.18
molecular_function	GO:0001077	RNA polymerase II core promoter proximal region sequence-specific DNA binding transcription factor activity involved in positive regulation of transcription	2	68	53	2.27	0.18
cellular_component	GO:0000228	nuclear chromosome	2	69	53	2.23	0.18
cellular_component	GO:0001725	stress fiber	2	72	53	2.14	0.18
cellular_component	GO:0005813	centrosome	3	561	53	0.41	0.18
cellular_component	GO:0005819	spindle	2	92	53	1.67	0.17
biological_process	GO:0032088	negative regulation of NF-kappaB transcription factor activity	2	94	53	1.64	0.17
cellular_component	GO:0019038	provirus	2	109	53	1.41	0.17
cellular_component	GO:0005635	nuclear envelope	2	134	53	1.15	0.17
molecular_function	GO:0008022	protein C-terminus binding	2	159	53	0.97	0.16
molecular_function	GO:0005525	GTP binding	2	194	53	0.79	0.16
cellular_component	GO:0005618	cell wall	3	788	53	0.29	0.16
cellular_component	GO:0015629	actin cytoskeleton	2	260	53	0.59	0.15
cellular_component	GO:0043234	protein complex	2	263	53	0.59	0.15
cellular_component	GO:0005743	mitochondrial inner membrane	2	321	53	0.48	0.14
cellular_component	GO:0020011	apicoplast	2	529	53	0.29	0.13
cellular_component	GO:0048471	perinuclear region of cytoplasm	2	592	53	0.26	0.12
cellular_component	GO:0005829	cytosol	6	3778	53	0.12	0.12
molecular_function	GO:0010385	double-stranded methylated DNA binding	1	1	53	77.01	0.09
cellular_component	GO:0070088	PHA granule	1	1	53	77.01	0.09
cellular_component	GO:0000805	X chromosome	1	1	53	77.01	0.09
cellular_component	GO:0032545	CURI complex	1	1	53	77.01	0.09
biological_process	GO:0044727	DNA demethylation of male pronucleus	1	1	53	77.01	0.09
biological_process	GO:0010424	DNA methylation on cytosine within a CG sequence	1	1	53	77.01	0.09
biological_process	GO:0045898	regulation of RNA polymerase II transcriptional preinitiation complex assembly	1	1	53	77.01	0.09
biological_process	GO:2000234	positive regulation of rRNA processing	1	1	53	77.01	0.09
biological_process	GO:0010688	negative regulation of ribosomal protein gene transcription from RNA polymerase II promoter	1	1	53	77.01	0.09
biological_process	GO:0007070	negative regulation of transcription from RNA polymerase II promoter during mitosis	1	1	53	77.01	0.09
biological_process	GO:0060262	negative regulation of N-terminal protein palmitoylation	1	1	53	77.01	0.09
biological_process	GO:0032775	DNA methylation on adenine	1	1	53	77.01	0.09
biological_process	GO:0006447	regulation of translational initiation by iron	1	1	53	77.01	0.09
molecular_function	GO:0001159	core promoter proximal region DNA binding	1	2	53	38.51	0.09
molecular_function	GO:0000182	rDNA binding	1	2	53	38.51	0.09
cellular_component	GO:0001940	male pronucleus	1	2	53	38.51	0.09
biological_process	GO:0043045	DNA methylation involved in embryo development	1	2	53	38.51	0.09
biological_process	GO:0000117	regulation of transcription involved in G2/M-phase of mitotic cell cycle	1	2	53	38.51	0.09
biological_process	GO:0009386	translational attenuation	1	2	53	38.51	0.09
molecular_function	GO:0001031	RNA polymerase III type 2 promoter DNA binding	1	3	53	25.67	0.09
molecular_function	GO:0001032	RNA polymerase III type 3 promoter DNA binding	1	3	53	25.67	0.09
molecular_function	GO:0035516	oxidative DNA demethylase activity	1	3	53	25.67	0.09
molecular_function	GO:0001030	RNA polymerase III type 1 promoter DNA binding	1	3	53	25.67	0.09
molecular_function	GO:0043906	Ala-tRNA(Pro) hydrolase activity	1	3	53	25.67	0.09
molecular_function	GO:0070539	linoleic acid binding	1	3	53	25.67	0.09
molecular_function	GO:0001227	RNA polymerase II transcription regulatory region sequence-specific DNA binding transcription factor activity involved in negative regulation of transcription	1	3	53	25.67	0.09
cellular_component	GO:0001740	Barr body	1	3	53	25.67	0.09
cellular_component	GO:0032937	SREBP-SCAP-Insig complex	1	3	53	25.67	0.09
biological_process	GO:0001869	negative regulation of complement activation, lectin pathway	1	3	53	25.67	0.09
molecular_function	GO:0070579	methylcytosine dioxygenase activity	1	4	53	19.25	0.09
molecular_function	GO:0003696	satellite DNA binding	1	4	53	19.25	0.09
cellular_component	GO:0030895	apolipoprotein B mRNA editing enzyme complex	1	4	53	19.25	0.09
biological_process	GO:0035196	production of miRNAs involved in gene silencing by miRNA	1	4	53	19.25	0.09
biological_process	GO:0033217	regulation of transcription from RNA polymerase II promoter in response to iron ion starvation	1	4	53	19.25	0.09
molecular_function	GO:0004298	threonine-type endopeptidase activity	1	5	53	15.4	0.09
molecular_function	GO:0000900	translation repressor activity, nucleic acid binding	1	5	53	15.4	0.09
molecular_function	GO:0008140	cAMP response element binding protein binding	1	5	53	15.4	0.09
molecular_function	GO:0030618	transforming growth factor beta receptor, pathway-specific cytoplasmic mediator activity	1	5	53	15.4	0.09
molecular_function	GO:0005497	androgen binding	1	5	53	15.4	0.09
cellular_component	GO:0034399	nuclear periphery	1	5	53	15.4	0.09
biological_process	GO:0007228	positive regulation of hh target transcription factor activity	1	5	53	15.4	0.09
biological_process	GO:0035552	oxidative single-stranded DNA demethylation	1	5	53	15.4	0.09
biological_process	GO:0032933	SREBP signaling pathway	1	5	53	15.4	0.09
biological_process	GO:0033119	negative regulation of RNA splicing	1	5	53	15.4	0.09
molecular_function	GO:0030275	LRR domain binding	1	6	53	12.84	0.09
molecular_function	GO:0003707	steroid hormone receptor activity	1	6	53	12.84	0.09
cellular_component	GO:0044428	nuclear part	1	6	53	12.84	0.09
molecular_function	GO:0051019	mitogen-activated protein kinase binding	1	7	53	11	0.09
biological_process	GO:0032786	positive regulation of DNA-dependent transcription, elongation	1	7	53	11	0.09
molecular_function	GO:0043734	DNA-N1-methyladenine dioxygenase activity	1	8	53	9.63	0.09
molecular_function	GO:0001103	RNA polymerase II repressing transcription factor binding	1	9	53	8.56	0.09
molecular_function	GO:0003747	translation release factor activity	1	9	53	8.56	0.09
molecular_function	GO:0035326	enhancer binding	1	10	53	7.7	0.09
molecular_function	GO:0008430	selenium binding	1	11	53	7	0.09
cellular_component	GO:0033588	Elongator holoenzyme complex	1	11	53	7	0.09
cellular_component	GO:0043596	nuclear replication fork	1	12	53	6.42	0.09
cellular_component	GO:0000792	heterochromatin	1	12	53	6.42	0.09
cellular_component	GO:0042788	polysomal ribosome	1	12	53	6.42	0.09
cellular_component	GO:0005678	chromatin assembly complex	1	13	53	5.92	0.09
molecular_function	GO:0035257	nuclear hormone receptor binding	1	14	53	5.5	0.09
molecular_function	GO:0097351	toxin-antitoxin pair type II binding	1	15	53	5.13	0.09
molecular_function	GO:0016987	sigma factor activity	1	17	53	4.53	0.09
molecular_function	GO:0035198	miRNA binding	1	18	53	4.28	0.09
cellular_component	GO:0016514	SWI/SNF complex	1	18	53	4.28	0.09
molecular_function	GO:0004882	androgen receptor activity	1	20	53	3.85	0.09
biological_process	GO:0043488	regulation of mRNA stability	1	20	53	3.85	0.09
cellular_component	GO:0035145	exon-exon junction complex	1	21	53	3.67	0.09
biological_process	GO:0033120	positive regulation of RNA splicing	1	21	53	3.67	0.09
molecular_function	GO:0001972	retinoic acid binding	1	22	53	3.5	0.09
molecular_function	GO:0045502	dynein binding	1	22	53	3.5	0.09
molecular_function	GO:0000988	protein binding transcription factor activity	1	22	53	3.5	0.09
molecular_function	GO:0004386	helicase activity	1	22	53	3.5	0.09
molecular_function	GO:0004647	phosphoserine phosphatase activity	1	23	53	3.35	0.09
molecular_function	GO:0003676	nucleic acid binding	1	23	53	3.35	0.09
molecular_function	GO:0003899	DNA-directed RNA polymerase activity	1	24	53	3.21	0.09
biological_process	GO:0031648	protein destabilization	1	25	53	3.08	0.09
molecular_function	GO:0051059	NF-kappaB binding	1	26	53	2.96	0.09
molecular_function	GO:0000977	RNA polymerase II regulatory region sequence-specific DNA binding	1	26	53	2.96	0.09
biological_process	GO:0061418	regulation of transcription from RNA polymerase II promoter in response to hypoxia	1	26	53	2.96	0.09
molecular_function	GO:0001102	RNA polymerase II activating transcription factor binding	1	27	53	2.85	0.09
biological_process	GO:0006342	chromatin silencing	1	27	53	2.85	0.09
molecular_function	GO:0017112	Rab guanyl-nucleotide exchange factor activity	1	29	53	2.66	0.09
molecular_function	GO:0035035	histone acetyltransferase binding	1	29	53	2.66	0.09
molecular_function	GO:0043425	bHLH transcription factor binding	1	31	53	2.48	0.09
molecular_function	GO:0042054	histone methyltransferase activity	1	33	53	2.33	0.09
cellular_component	GO:0015030	Cajal body	1	33	53	2.33	0.09
molecular_function	GO:0008234	cysteine-type peptidase activity	1	34	53	2.27	0.09
molecular_function	GO:0008757	S-adenosylmethionine-dependent methyltransferase activity	1	39	53	1.97	0.09
molecular_function	GO:0000166	nucleotide binding	1	44	53	1.75	0.09
molecular_function	GO:0030331	estrogen receptor binding	1	46	53	1.67	0.09
molecular_function	GO:0050681	androgen receptor binding	1	47	53	1.64	0.09
molecular_function	GO:0035091	phosphatidylinositol binding	1	49	53	1.57	0.09
molecular_function	GO:0001078	RNA polymerase II core promoter proximal region sequence-specific DNA binding transcription factor activity involved in negative regulation of transcription	1	51	53	1.51	0.09
molecular_function	GO:0003712	transcription cofactor activity	1	54	53	1.43	0.09
cellular_component	GO:0071339	MLL1 complex	1	55	53	1.4	0.09
molecular_function	GO:0019902	phosphatase binding	1	57	53	1.35	0.09
molecular_function	GO:0030674	protein binding, bridging	1	58	53	1.33	0.09
molecular_function	GO:0008289	lipid binding	1	58	53	1.33	0.09
biological_process	GO:0030513	positive regulation of BMP signaling pathway	1	58	53	1.33	0.09
molecular_function	GO:0042826	histone deacetylase binding	1	62	53	1.24	0.09
molecular_function	GO:0004004	ATP-dependent RNA helicase activity	1	63	53	1.22	0.09
molecular_function	GO:0016787	hydrolase activity	1	69	53	1.12	0.09
molecular_function	GO:0032947	protein complex scaffold	1	70	53	1.1	0.09
molecular_function	GO:0070888	E-box binding	1	78	53	0.99	0.09
molecular_function	GO:0051082	unfolded protein binding	1	87	53	0.89	0.09
cellular_component	GO:0005856	cytoskeleton	1	96	53	0.8	0.09
molecular_function	GO:0000049	tRNA binding	1	105	53	0.73	0.09
cellular_component	GO:0030054	cell junction	1	123	53	0.63	0.08
molecular_function	GO:0008144	drug binding	1	139	53	0.55	0.08
cellular_component	GO:0030496	midbody	1	143	53	0.54	0.08
molecular_function	GO:0008201	heparin binding	1	152	53	0.51	0.08
molecular_function	GO:0008233	peptidase activity	1	157	53	0.49	0.08
molecular_function	GO:0004867	serine-type endopeptidase inhibitor activity	1	191	53	0.4	0.08
molecular_function	GO:0005215	transporter activity	1	219	53	0.35	0.08
molecular_function	GO:0008017	microtubule binding	1	235	53	0.33	0.08
cellular_component	GO:0045121	membrane raft	1	244	53	0.32	0.08
molecular_function	GO:0020037	heme binding	1	265	53	0.29	0.07
molecular_function	GO:0000287	magnesium ion binding	1	428	53	0.18	0.07
biological_process	GO:0010467	gene expression	1	663	53	0.12	0.06
cellular_component	GO:0005576	extracellular region	2	2335	53	0.07	0.06
cellular_component	GO:0005783	endoplasmic reticulum	1	899	53	0.09	0.05
cellular_component	GO:0016021	integral to membrane	1	1034	53	0.07	0.05
cellular_component	GO:0005887	integral to plasma membrane	1	1324	53	0.06	0.04
