# Supplementary material for: GOLink: Finding Cooccurring Terms across Gene Ontology Namespaces
Source: Int J Genomics. 2013 Dec 31;2013:594528. doi: 10.1155/2013/594528 (PMC3892482; doi:10.1155/2013/594528)
Supplement: Supplementary file 1 — (SupplementaryFile1.xls): GOLink terms lists generated using the query term ‘regulation of gene expression', the evidence code filter “!IEA” and database filter ‘UniProtKB'. Supplementary File 2 (SupplementaryFile2.xls): The top 50 Molecular Function terms from each GOLink terms list (a); the genes and annotation used for the positive list and the negative list (b); the raw statistical data for sensitivity, specificity, accuracy, PPV, NPV and the number and proportion of positive and negative genes found (c). These latter data correspond to Figure 3. Supplementary File 3 (SupplementaryFile3.xls): The genes and annotation used for the positive list and the negative list and raw statistical data for sensitivity, specificity, accuracy, PPV, NPV and the number and proportion of positive and negative genes found when the true positives from Supplementary Table 2 are removed (a). The raw statistical data when both the true positives and the term ‘protein binding' are removed from the GOLink terms lists (b). Supplementary File 4 (SupplementaryFile4.xls): The five GOLink all_list terms lists generated using the query term ‘regulation of gene expression' and the evidence code filter “!IEA” for each of the five annotation sources (“UniprotKB, “PomBase”, “MGI”, “SGD” and “ZFIN”) used in the creation of Figure 4. Supplementary File 5 (SupplementaryFile5.xls): a) Summary of the top 100 terms from a GOLink query_list terms list (b) and a QuickGO terms list (c) generated using the query term ‘regulation of gene expression' and the evidence code filter “!IEA”. Supplementary Figure 1 (SupplementaryFigure1.jpg): Venn diagram showing the overlap between the top 50 Molecular Function terms from each of the three GOLink terms lists as found in Supplementary File 2. Supplementary Table 1 (SupplementaryTable1.doc): The 59 GOLink consensus terms found in all three GOLink terms lists. Supplementary Table 2 (SupplementaryTable2.doc): Genes from the negative list deemed t [file 594528.f1.zip › Files/SupplementaryFile2.xls]

## Sheet: a) all_list_mf_50
Namespace	GO_ID	GO_Name	Together	TermCount	SubjectCount	Score(PR)	Score(S%)
molecular_function	GO:0003700	sequence-specific DNA binding transcription factor activity	1035	1142	53	14.9807	20.31
molecular_function	GO:0005515	protein binding	1331	7000	53	3.14296	12.49
molecular_function	GO:0003677	DNA binding	540	893	53	9.99542	10.11
molecular_function	GO:0008134	transcription factor binding	311	398	53	12.9162	6.13
molecular_function	GO:0043565	sequence-specific DNA binding	307	368	53	13.7895	6.08
molecular_function	GO:0003713	transcription coactivator activity	269	333	53	13.3526	5.32
molecular_function	GO:0044212	transcription regulatory region DNA binding	265	279	53	15.7	5.3
molecular_function	GO:0003682	chromatin binding	203	333	53	10.0765	3.96
molecular_function	GO:0042803	protein homodimerization activity	222	1180	53	3.10978	3.73
molecular_function	GO:0003705	RNA polymerase II distal enhancer sequence-specific DNA binding transcription factor activity	171	174	53	16.2445	3.42
molecular_function	GO:0003690	double-stranded DNA binding	163	234	53	11.5141	3.22
molecular_function	GO:0003714	transcription corepressor activity	158	199	53	13.1239	3.14
molecular_function	GO:0008301	DNA binding, bending	139	170	53	13.5153	2.77
molecular_function	GO:0042802	identical protein binding	134	504	53	4.39474	2.5
molecular_function	GO:0008270	zinc ion binding	137	658	53	3.44154	2.49
molecular_function	GO:0046982	protein heterodimerization activity	123	294	53	6.91539	2.38
molecular_function	GO:0003723	RNA binding	123	415	53	4.89909	2.33
molecular_function	GO:0019901	protein kinase binding	106	276	53	6.34827	2.05
molecular_function	GO:0004674	protein serine/threonine kinase activity	93	348	53	4.41736	1.77
molecular_function	GO:0004672	protein kinase activity	90	291	53	5.1122	1.73
molecular_function	GO:0019899	enzyme binding	84	241	53	5.76131	1.63
molecular_function	GO:0005509	calcium ion binding	85	384	53	3.65886	1.61
molecular_function	GO:0003743	translation initiation factor activity	80	172	53	7.68812	1.57
molecular_function	GO:0004842	ubiquitin-protein ligase activity	81	508	53	2.6356	1.5
molecular_function	GO:0031625	ubiquitin protein ligase binding	75	154	53	8.05006	1.48
molecular_function	GO:0042393	histone binding	73	107	53	11.2771	1.45
molecular_function	GO:0070888	E-box binding	71	78	53	15.046	1.42
molecular_function	GO:0005102	receptor binding	74	293	53	4.17468	1.42
molecular_function	GO:0001077	RNA polymerase II core promoter proximal region sequence-specific DNA binding transcription factor activity involved in positive regulation of transcription	67	68	53	16.2864	1.34
molecular_function	GO:0003729	mRNA binding	64	107	53	9.88678	1.27
molecular_function	GO:0005524	ATP binding	67	525	53	2.10947	1.23
molecular_function	GO:0019904	protein domain specific binding	61	111	53	9.08376	1.21
molecular_function	GO:0030374	ligand-dependent nuclear receptor transcription coactivator activity	60	64	53	15.4964	1.2
molecular_function	GO:0008017	microtubule binding	58	235	53	4.07961	1.12
molecular_function	GO:0008013	beta-catenin binding	54	91	53	9.80869	1.07
molecular_function	GO:0004221	ubiquitin thiolesterase activity	53	127	53	6.89812	1.05
molecular_function	GO:0001078	RNA polymerase II core promoter proximal region sequence-specific DNA binding transcription factor activity involved in negative regulation of transcription	51	51	53	16.5295	1.02
molecular_function	GO:0001047	core promoter binding	51	53	53	15.9057	1.02
molecular_function	GO:0046332	SMAD binding	51	65	53	12.9693	1.02
molecular_function	GO:0008201	heparin binding	51	152	53	5.54607	1
molecular_function	GO:0008022	protein C-terminus binding	51	159	53	5.3019	1
molecular_function	GO:0004871	signal transducer activity	53	381	53	2.29937	1
molecular_function	GO:0005125	cytokine activity	48	91	53	8.71884	0.95
molecular_function	GO:0008083	growth factor activity	47	105	53	7.3989	0.93
molecular_function	GO:0004879	ligand-activated sequence-specific DNA binding RNA polymerase II transcription factor activity	46	51	53	14.9089	0.92
molecular_function	GO:0004872	receptor activity	48	292	53	2.71717	0.92
molecular_function	GO:0004843	ubiquitin-specific protease activity	46	138	53	5.50982	0.91
molecular_function	GO:0000981	sequence-specific DNA binding RNA polymerase II transcription factor activity	45	45	53	16.5295	0.9
molecular_function	GO:0046966	thyroid hormone receptor binding	45	53	53	14.0344	0.9
molecular_function	GO:0042826	histone deacetylase binding	45	62	53	11.9972	0.9

## Sheet: a) query_list_mf_50
Namespace	GO_ID	GO_Name	Together	TermCount	SubjectCount	Score(PR)	Score(S%)
molecular_function	GO:0001071	nucleic acid binding transcription factor activity	10	42	53	370.539	11.76
molecular_function	GO:0003714	transcription corepressor activity	13	199	53	101.665	5.44
molecular_function	GO:0019865	immunoglobulin binding	3	7	53	666.97	5.26
molecular_function	GO:0043395	heparan sulfate proteoglycan binding	3	8	53	583.599	5.17
molecular_function	GO:0050431	transforming growth factor beta binding	3	19	53	245.726	4.35
molecular_function	GO:0051879	Hsp90 protein binding	2	14	53	222.323	3.08
molecular_function	GO:0051428	peptide hormone receptor binding	2	17	53	183.09	2.94
molecular_function	GO:0043498	cell surface binding	3	52	53	89.7845	2.94
molecular_function	GO:0035198	miRNA binding	2	18	53	172.918	2.9
molecular_function	GO:0004693	cyclin-dependent protein kinase activity	2	34	53	91.545	2.35
molecular_function	GO:0046872	metal ion binding	3	83	53	56.2505	2.26
molecular_function	GO:0030379	neurotensin receptor activity, non-G-protein coupled	1	1	53	1556.26	1.89
molecular_function	GO:0050692	DBD domain binding	1	1	53	1556.26	1.89
molecular_function	GO:0097063	cadmium ion sensor activity	1	1	53	1556.26	1.89
molecular_function	GO:0044212	transcription regulatory region DNA binding	6	279	53	33.468	1.84
molecular_function	GO:0010465	nerve growth factor receptor activity	1	3	53	518.755	1.82
molecular_function	GO:0070123	transforming growth factor beta receptor activity, type III	1	3	53	518.755	1.82
molecular_function	GO:0071535	RING-like zinc finger domain binding	1	3	53	518.755	1.82
molecular_function	GO:0005141	interleukin-10 receptor binding	1	4	53	389.066	1.79
molecular_function	GO:0050693	LBD domain binding	1	4	53	389.066	1.79
molecular_function	GO:0005025	transforming growth factor beta receptor activity, type I	1	5	53	311.253	1.75
molecular_function	GO:0048406	nerve growth factor binding	1	5	53	311.253	1.75
molecular_function	GO:0032791	lead ion binding	1	7	53	222.323	1.69
molecular_function	GO:0034713	type I transforming growth factor beta receptor binding	1	9	53	172.918	1.64
molecular_function	GO:0030332	cyclin binding	1	12	53	129.689	1.56
molecular_function	GO:0035257	nuclear hormone receptor binding	1	14	53	111.162	1.52
molecular_function	GO:0008201	heparin binding	3	152	53	30.7157	1.49
molecular_function	GO:0005539	glycosaminoglycan binding	1	16	53	97.2665	1.47
molecular_function	GO:0016922	ligand-dependent nuclear receptor binding	1	16	53	97.2665	1.47
molecular_function	GO:0046870	cadmium ion binding	1	17	53	91.545	1.45
molecular_function	GO:0003705	RNA polymerase II distal enhancer sequence-specific DNA binding transcription factor activity	3	174	53	26.8321	1.34
molecular_function	GO:0005057	receptor signaling protein activity	1	27	53	57.6394	1.27
molecular_function	GO:0035035	histone acetyltransferase binding	1	29	53	53.6643	1.23
molecular_function	GO:0003680	AT DNA binding	1	40	53	38.9066	1.09
molecular_function	GO:0000981	sequence-specific DNA binding RNA polymerase II transcription factor activity	1	45	53	34.5836	1.03
molecular_function	GO:0019899	enzyme binding	3	241	53	19.3726	1.03
molecular_function	GO:0031625	ubiquitin protein ligase binding	2	154	53	20.2112	0.98
molecular_function	GO:0004879	ligand-activated sequence-specific DNA binding RNA polymerase II transcription factor activity	1	51	53	30.515	0.97
molecular_function	GO:0020037	heme binding	3	265	53	17.6181	0.95
molecular_function	GO:0042277	peptide binding	1	57	53	27.3029	0.92
molecular_function	GO:0003677	DNA binding	8	893	53	13.9419	0.85
molecular_function	GO:0003713	transcription coactivator activity	3	333	53	14.0204	0.78
molecular_function	GO:0003700	sequence-specific DNA binding transcription factor activity	9	1142	53	12.2648	0.76
molecular_function	GO:0047485	protein N-terminus binding	1	85	53	18.309	0.73
molecular_function	GO:0043565	sequence-specific DNA binding	3	368	53	12.6869	0.72
molecular_function	GO:0008270	zinc ion binding	5	658	53	11.8257	0.71
molecular_function	GO:0005125	cytokine activity	1	91	53	17.1018	0.7
molecular_function	GO:0008134	transcription factor binding	3	398	53	11.7306	0.67
molecular_function	GO:0008083	growth factor activity	1	105	53	14.8216	0.64
molecular_function	GO:0042393	histone binding	1	107	53	14.5445	0.63

## Sheet: a) parchild_list_mf_50
Namespace	GO_ID	GO_Name	Together	TermCount	SubjectCount	Score(PR)	Score(S%)
molecular_function	GO:0003700	sequence-specific DNA binding transcription factor activity	402	1142	53	27.11	22.2
molecular_function	GO:0003677	DNA binding	100	893	53	8.62419	5.36
molecular_function	GO:0003743	translation initiation factor activity	56	172	53	25.0743	4.72
molecular_function	GO:0043565	sequence-specific DNA binding	37	368	53	7.74326	2.64
molecular_function	GO:0003714	transcription corepressor activity	21	199	53	8.12711	1.68
molecular_function	GO:0008270	zinc ion binding	28	658	53	3.27719	1.65
molecular_function	GO:0003713	transcription coactivator activity	22	333	53	5.08801	1.59
molecular_function	GO:0044212	transcription regulatory region DNA binding	19	279	53	5.24468	1.43
molecular_function	GO:0005515	protein binding	112	7000	53	1.23222	1.41
molecular_function	GO:0008134	transcription factor binding	18	398	53	3.48305	1.24
molecular_function	GO:0001071	nucleic acid binding transcription factor activity	13	42	53	23.8377	1.18
molecular_function	GO:0046982	protein heterodimerization activity	14	294	53	3.66733	1.04
molecular_function	GO:0003723	RNA binding	15	415	53	2.78364	1.02
molecular_function	GO:0008607	phosphorylase kinase regulator activity	10	16	53	48.1338	0.93
molecular_function	GO:0003705	RNA polymerase II distal enhancer sequence-specific DNA binding transcription factor activity	10	174	53	4.42609	0.81
molecular_function	GO:0042803	protein homodimerization activity	18	1180	53	1.17479	0.81
molecular_function	GO:0003729	mRNA binding	9	107	53	6.47781	0.77
molecular_function	GO:0035438	cyclic-di-GMP binding	8	8	53	77.014	0.75
molecular_function	GO:0002161	aminoacyl-tRNA editing activity	8	9	53	68.4569	0.75
molecular_function	GO:0030371	translation repressor activity	8	19	53	32.4269	0.74
molecular_function	GO:0003682	chromatin binding	10	333	53	2.31273	0.72
molecular_function	GO:0000975	regulatory region DNA binding	7	15	53	35.9399	0.65
molecular_function	GO:0046983	protein dimerization activity	8	176	53	3.50064	0.65
molecular_function	GO:0001104	RNA polymerase II transcription cofactor activity	7	40	53	13.4775	0.63
molecular_function	GO:0003725	double-stranded RNA binding	7	49	53	11.002	0.63
molecular_function	GO:0005509	calcium ion binding	9	384	53	1.80502	0.62
molecular_function	GO:0003690	double-stranded DNA binding	8	234	53	2.63296	0.62
molecular_function	GO:0003886	DNA (cytosine-5-)-methyltransferase activity	5	8	53	48.1338	0.47
molecular_function	GO:0000993	RNA polymerase II core binding	5	32	53	12.0334	0.46
molecular_function	GO:0008135	translation factor activity, nucleic acid binding	5	36	53	10.6964	0.45
molecular_function	GO:0042802	identical protein binding	6	504	53	0.916833	0.38
molecular_function	GO:0070551	endoribonuclease activity, cleaving siRNA-paired mRNA	4	5	53	61.6112	0.37
molecular_function	GO:0035197	siRNA binding	4	17	53	18.1209	0.37
molecular_function	GO:0070742	C2H2 zinc finger domain binding	4	17	53	18.1209	0.37
molecular_function	GO:0000340	RNA 7-methylguanosine cap binding	4	19	53	16.2135	0.37
molecular_function	GO:0070491	repressing transcription factor binding	4	22	53	14.0025	0.37
molecular_function	GO:0001106	RNA polymerase II transcription corepressor activity	4	31	53	9.93729	0.36
molecular_function	GO:0030374	ligand-dependent nuclear receptor transcription coactivator activity	4	64	53	4.81338	0.35
molecular_function	GO:0035064	methylated histone residue binding	4	68	53	4.53024	0.35
molecular_function	GO:0047485	protein N-terminus binding	4	85	53	3.62419	0.35
molecular_function	GO:0019904	protein domain specific binding	4	111	53	2.77528	0.34
molecular_function	GO:0043856	anti-sigma factor antagonist activity	3	4	53	57.7605	0.28
molecular_function	GO:0004887	thyroid hormone receptor activity	3	8	53	28.8803	0.28
molecular_function	GO:0017151	DEAD/H-box RNA helicase binding	3	8	53	28.8803	0.28
molecular_function	GO:0048027	mRNA 5'-UTR binding	3	9	53	25.6713	0.28
molecular_function	GO:0016989	sigma factor antagonist activity	3	10	53	23.1042	0.28
molecular_function	GO:0030598	rRNA N-glycosylase activity	3	10	53	23.1042	0.28
molecular_function	GO:0008494	translation activator activity	3	13	53	17.7725	0.28
molecular_function	GO:0070324	thyroid hormone binding	3	20	53	11.5521	0.28
molecular_function	GO:0003727	single-stranded RNA binding	3	31	53	7.45297	0.27
								0.09
								0.09
								0.09
								0.09
								0.09
								0.09
								0.09
								0.09
								0.09
								0.09
								0.09
								0.09
								0.08
								0.08
								0.08
								0.08
								0.08
								0.08
								0.07
								0.07

## Sheet: b) RegGenExp_data
GeneID	Namespace	GO_ID	GO_Name
P53411	molecular_function	GO:0003714	transcription corepressor activity
P53411	molecular_function	GO:0001071	nucleic acid binding transcription factor activity
P53411	cellular_component	GO:0005634	nucleus
P53411	cellular_component	GO:0043234	protein complex
P53411	biological_process	GO:0040019	positive regulation of embryonic development
P53411	biological_process	GO:0072050	S-shaped body morphogenesis
P53411	biological_process	GO:0001705	ectoderm formation
P53411	biological_process	GO:0010842	retina layer formation
P53411	biological_process	GO:0021937	cerebellar Purkinje cell-granule cell precursor cell signaling involved in regulation of granule cell precursor cell proliferation
P53411	biological_process	GO:0021527	spinal cord association neuron differentiation
P53411	biological_process	GO:0007389	pattern specification process
P53411	biological_process	GO:0072049	comma-shaped body morphogenesis
P53411	biological_process	GO:0009791	post-embryonic development
P53411	biological_process	GO:0045892	negative regulation of transcription, DNA-dependent
P53411	biological_process	GO:0009953	dorsal/ventral pattern formation
P53411	biological_process	GO:0009653	anatomical structure morphogenesis
P53411	biological_process	GO:0001702	gastrulation with mouth forming second
P53411	biological_process	GO:0008045	motor neuron axon guidance
P53411	biological_process	GO:0048703	embryonic viscerocranium morphogenesis
P53411	biological_process	GO:0090190	positive regulation of branching involved in ureteric bud morphogenesis
P53411	biological_process	GO:0060322	head development
P53411	biological_process	GO:0001764	neuron migration
P53411	biological_process	GO:2000768	positive regulation of nephron tubule epithelial cell differentiation
P53411	biological_process	GO:0021522	spinal cord motor neuron differentiation
P53411	biological_process	GO:0048646	anatomical structure formation involved in morphogenesis
P53411	biological_process	GO:0061205	paramesonephric duct development
P53411	biological_process	GO:0072178	nephric duct morphogenesis
P53411	biological_process	GO:0009952	anterior/posterior pattern specification
P53411	biological_process	GO:0060429	epithelium development
P53411	biological_process	GO:0010468	regulation of gene expression
P53411	biological_process	GO:0001822	kidney development
P53411	biological_process	GO:0001706	endoderm formation
P53411	biological_process	GO:2000744	positive regulation of anterior head development
P53411	biological_process	GO:0045893	positive regulation of transcription, DNA-dependent
P53411	biological_process	GO:0090009	primitive streak formation
P53411	biological_process	GO:0009880	embryonic pattern specification
P53411	biological_process	GO:0072077	renal vesicle morphogenesis
P53411	biological_process	GO:2000543	positive regulation of gastrulation
P53411	biological_process	GO:0021549	cerebellum development
P53411	biological_process	GO:0001655	urogenital system development
P53411	biological_process	GO:0007267	cell-cell signaling
P53411	biological_process	GO:0021517	ventral spinal cord development
P53411	biological_process	GO:0060059	embryonic retina morphogenesis in camera-type eye
P53411	biological_process	GO:0006366	transcription from RNA polymerase II promoter
P53411	biological_process	GO:0021871	forebrain regionalization
P53411	biological_process	GO:0021702	cerebellar Purkinje cell differentiation
P53411	biological_process	GO:0001657	ureteric bud development
P53411	biological_process	GO:0009948	anterior/posterior axis specification
Q06900	molecular_function	GO:0005025	transforming growth factor beta receptor activity, type I
Q06900	molecular_function	GO:0005057	receptor signaling protein activity
Q06900	molecular_function	GO:0050431	transforming growth factor beta binding
Q06900	cellular_component	GO:0005623	cell
Q06900	biological_process	GO:0010468	regulation of gene expression
Q06900	biological_process	GO:0060317	cardiac epithelial to mesenchymal transition
Q06900	biological_process	GO:0010692	regulation of alkaline phosphatase activity
Q06900	biological_process	GO:0010717	regulation of epithelial to mesenchymal transition
Q06900	biological_process	GO:0010628	positive regulation of gene expression
Q06900	biological_process	GO:0045893	positive regulation of transcription, DNA-dependent
Q06900	biological_process	GO:0042118	endothelial cell activation
Q06900	biological_process	GO:0001938	positive regulation of endothelial cell proliferation
Q06900	biological_process	GO:0048762	mesenchymal cell differentiation
Q90998	molecular_function	GO:0005539	glycosaminoglycan binding
Q90998	molecular_function	GO:0070123	transforming growth factor beta receptor activity, type III
Q90998	molecular_function	GO:0050431	transforming growth factor beta binding
Q90998	cellular_component	GO:0005887	integral to plasma membrane
Q90998	biological_process	GO:0030324	lung development
Q90998	biological_process	GO:0007399	nervous system development
Q90998	biological_process	GO:0010468	regulation of gene expression
Q90998	biological_process	GO:0016477	cell migration
Q90998	biological_process	GO:0030335	positive regulation of cell migration
Q90998	biological_process	GO:0060317	cardiac epithelial to mesenchymal transition
Q90998	biological_process	GO:0001822	kidney development
Q90998	biological_process	GO:0007162	negative regulation of cell adhesion
Q90998	biological_process	GO:0048568	embryonic organ development
Q90998	biological_process	GO:0003007	heart morphogenesis
Q90998	biological_process	GO:0022408	negative regulation of cell-cell adhesion
Q90998	biological_process	GO:0001837	epithelial to mesenchymal transition
Q90998	biological_process	GO:0001889	liver development
Q90998	biological_process	GO:0001654	eye development
Q90998	biological_process	GO:0007507	heart development
Q90998	biological_process	GO:0010628	positive regulation of gene expression
Q90998	biological_process	GO:0042118	endothelial cell activation
Q90998	biological_process	GO:0009790	embryo development
Q90998	biological_process	GO:0048566	embryonic digestive tract development
Q90998	biological_process	GO:0048762	mesenchymal cell differentiation
Q90999	molecular_function	GO:0005515	protein binding
Q90999	molecular_function	GO:0034713	type I transforming growth factor beta receptor binding
Q90999	molecular_function	GO:0050431	transforming growth factor beta binding
Q90999	cellular_component	GO:0009897	external side of plasma membrane
Q90999	cellular_component	GO:0005623	cell
Q90999	biological_process	GO:0030324	lung development
Q90999	biological_process	GO:0010468	regulation of gene expression
Q90999	biological_process	GO:0016477	cell migration
Q90999	biological_process	GO:0030335	positive regulation of cell migration
Q90999	biological_process	GO:0060317	cardiac epithelial to mesenchymal transition
Q90999	biological_process	GO:0001654	eye development
Q90999	biological_process	GO:0007162	negative regulation of cell adhesion
Q90999	biological_process	GO:0007507	heart development
Q90999	biological_process	GO:0010718	positive regulation of epithelial to mesenchymal transition
Q90999	biological_process	GO:0001775	cell activation
Q90999	biological_process	GO:0022408	negative regulation of cell-cell adhesion
Q90999	biological_process	GO:0009790	embryo development
Q90999	biological_process	GO:0048762	mesenchymal cell differentiation
A7Z015	molecular_function	GO:0003714	transcription corepressor activity
A7Z015	molecular_function	GO:0001071	nucleic acid binding transcription factor activity
A7Z015	cellular_component	GO:0005634	nucleus
A7Z015	cellular_component	GO:0043234	protein complex
A7Z015	biological_process	GO:0040019	positive regulation of embryonic development
A7Z015	biological_process	GO:0072050	S-shaped body morphogenesis
A7Z015	biological_process	GO:0060065	uterus development
A7Z015	biological_process	GO:0001705	ectoderm formation
A7Z015	biological_process	GO:0010842	retina layer formation
A7Z015	biological_process	GO:0021937	cerebellar Purkinje cell-granule cell precursor cell signaling involved in regulation of granule cell precursor cell proliferation
A7Z015	biological_process	GO:0021527	spinal cord association neuron differentiation
A7Z015	biological_process	GO:0060067	cervix development
A7Z015	biological_process	GO:0007389	pattern specification process
A7Z015	biological_process	GO:0072049	comma-shaped body morphogenesis
A7Z015	biological_process	GO:0009791	post-embryonic development
A7Z015	biological_process	GO:0035847	uterine epithelium development
A7Z015	biological_process	GO:0045892	negative regulation of transcription, DNA-dependent
A7Z015	biological_process	GO:0009653	anatomical structure morphogenesis
A7Z015	biological_process	GO:0009953	dorsal/ventral pattern formation
A7Z015	biological_process	GO:0001702	gastrulation with mouth forming second
A7Z015	biological_process	GO:0008045	motor neuron axon guidance
A7Z015	biological_process	GO:0048703	embryonic viscerocranium morphogenesis
A7Z015	biological_process	GO:0090190	positive regulation of branching involved in ureteric bud morphogenesis
A7Z015	biological_process	GO:0060322	head development
A7Z015	biological_process	GO:0001764	neuron migration
A7Z015	biological_process	GO:2000768	positive regulation of nephron tubule epithelial cell differentiation
A7Z015	biological_process	GO:0048646	anatomical structure formation involved in morphogenesis
A7Z015	biological_process	GO:0072178	nephric duct morphogenesis
A7Z015	biological_process	GO:0061205	paramesonephric duct development
A7Z015	biological_process	GO:0009952	anterior/posterior pattern specification
A7Z015	biological_process	GO:0060429	epithelium development
A7Z015	biological_process	GO:0010468	regulation of gene expression
A7Z015	biological_process	GO:0001822	kidney development
A7Z015	biological_process	GO:0060068	vagina development
A7Z015	biological_process	GO:0001706	endoderm formation
A7Z015	biological_process	GO:2000744	positive regulation of anterior head development
A7Z015	biological_process	GO:0045893	positive regulation of transcription, DNA-dependent
A7Z015	biological_process	GO:0090009	primitive streak formation
A7Z015	biological_process	GO:0009880	embryonic pattern specification
A7Z015	biological_process	GO:0060066	oviduct development
A7Z015	biological_process	GO:0072077	renal vesicle morphogenesis
A7Z015	biological_process	GO:0035846	oviduct epithelium development
A7Z015	biological_process	GO:2000543	positive regulation of gastrulation
A7Z015	biological_process	GO:0021549	cerebellum development
A7Z015	biological_process	GO:0001655	urogenital system development
A7Z015	biological_process	GO:0007267	cell-cell signaling
A7Z015	biological_process	GO:0060059	embryonic retina morphogenesis in camera-type eye
A7Z015	biological_process	GO:0006366	transcription from RNA polymerase II promoter
A7Z015	biological_process	GO:0021871	forebrain regionalization
A7Z015	biological_process	GO:0021702	cerebellar Purkinje cell differentiation
A7Z015	biological_process	GO:0001657	ureteric bud development
A7Z015	biological_process	GO:0009948	anterior/posterior axis specification
P33433	molecular_function	GO:0043498	cell surface binding
P33433	molecular_function	GO:0043395	heparan sulfate proteoglycan binding
P33433	molecular_function	GO:0046872	metal ion binding
P33433	molecular_function	GO:0020037	heme binding
P33433	molecular_function	GO:0008270	zinc ion binding
P33433	molecular_function	GO:0019865	immunoglobulin binding
P33433	molecular_function	GO:0008201	heparin binding
P33433	biological_process	GO:0010468	regulation of gene expression
P33433	biological_process	GO:0002839	positive regulation of immune response to tumor cell
P33433	biological_process	GO:2000504	positive regulation of blood vessel remodeling
P33433	biological_process	GO:0007162	negative regulation of cell adhesion
P33433	biological_process	GO:0050730	regulation of peptidyl-tyrosine phosphorylation
P33433	biological_process	GO:0030168	platelet activation
P33433	biological_process	GO:0032956	regulation of actin cytoskeleton organization
P33433	biological_process	GO:0010543	regulation of platelet activation
P33433	biological_process	GO:0030193	regulation of blood coagulation
P33433	biological_process	GO:0043065	positive regulation of apoptotic process
P33433	biological_process	GO:0008285	negative regulation of cell proliferation
P33433	biological_process	GO:0030308	negative regulation of cell growth
P33433	biological_process	GO:0050832	defense response to fungus
P33433	biological_process	GO:1900747	negative regulation of vascular endothelial growth factor signaling pathway
P33433	biological_process	GO:2001027	negative regulation of endothelial cell chemotaxis
P33433	biological_process	GO:0016525	negative regulation of angiogenesis
P33433	biological_process	GO:0033629	negative regulation of cell adhesion mediated by integrin
P33433	biological_process	GO:0051894	positive regulation of focal adhesion assembly
P33433	biological_process	GO:0043254	regulation of protein complex assembly
P33433	biological_process	GO:0010593	negative regulation of lamellipodium assembly
P33433	biological_process	GO:0043537	negative regulation of blood vessel endothelial cell migration
E2RMA8	molecular_function	GO:0003714	transcription corepressor activity
E2RMA8	molecular_function	GO:0001071	nucleic acid binding transcription factor activity
E2RMA8	cellular_component	GO:0005634	nucleus
E2RMA8	cellular_component	GO:0043234	protein complex
E2RMA8	biological_process	GO:0040019	positive regulation of embryonic development
E2RMA8	biological_process	GO:0072050	S-shaped body morphogenesis
E2RMA8	biological_process	GO:0060065	uterus development
E2RMA8	biological_process	GO:0001705	ectoderm formation
E2RMA8	biological_process	GO:0021937	cerebellar Purkinje cell-granule cell precursor cell signaling involved in regulation of granule cell precursor cell proliferation
E2RMA8	biological_process	GO:0010842	retina layer formation
E2RMA8	biological_process	GO:0021527	spinal cord association neuron differentiation
E2RMA8	biological_process	GO:0060067	cervix development
E2RMA8	biological_process	GO:0007389	pattern specification process
E2RMA8	biological_process	GO:0072049	comma-shaped body morphogenesis
E2RMA8	biological_process	GO:0009791	post-embryonic development
E2RMA8	biological_process	GO:0035847	uterine epithelium development
E2RMA8	biological_process	GO:0045892	negative regulation of transcription, DNA-dependent
E2RMA8	biological_process	GO:0009953	dorsal/ventral pattern formation
E2RMA8	biological_process	GO:0009653	anatomical structure morphogenesis
E2RMA8	biological_process	GO:0001702	gastrulation with mouth forming second
E2RMA8	biological_process	GO:0008045	motor neuron axon guidance
E2RMA8	biological_process	GO:0048703	embryonic viscerocranium morphogenesis
E2RMA8	biological_process	GO:0060322	head development
E2RMA8	biological_process	GO:0090190	positive regulation of branching involved in ureteric bud morphogenesis
E2RMA8	biological_process	GO:0001764	neuron migration
E2RMA8	biological_process	GO:2000768	positive regulation of nephron tubule epithelial cell differentiation
E2RMA8	biological_process	GO:0048646	anatomical structure formation involved in morphogenesis
E2RMA8	biological_process	GO:0061205	paramesonephric duct development
E2RMA8	biological_process	GO:0072178	nephric duct morphogenesis
E2RMA8	biological_process	GO:0009952	anterior/posterior pattern specification
E2RMA8	biological_process	GO:0060429	epithelium development
E2RMA8	biological_process	GO:0010468	regulation of gene expression
E2RMA8	biological_process	GO:0001822	kidney development
E2RMA8	biological_process	GO:0060068	vagina development
E2RMA8	biological_process	GO:0001706	endoderm formation
E2RMA8	biological_process	GO:2000744	positive regulation of anterior head development
E2RMA8	biological_process	GO:0045893	positive regulation of transcription, DNA-dependent
E2RMA8	biological_process	GO:0090009	primitive streak formation
E2RMA8	biological_process	GO:0009880	embryonic pattern specification
E2RMA8	biological_process	GO:0060066	oviduct development
E2RMA8	biological_process	GO:0072077	renal vesicle morphogenesis
E2RMA8	biological_process	GO:0035846	oviduct epithelium development
E2RMA8	biological_process	GO:2000543	positive regulation of gastrulation
E2RMA8	biological_process	GO:0021549	cerebellum development
E2RMA8	biological_process	GO:0001655	urogenital system development
E2RMA8	biological_process	GO:0007267	cell-cell signaling
E2RMA8	biological_process	GO:0060059	embryonic retina morphogenesis in camera-type eye
E2RMA8	biological_process	GO:0006366	transcription from RNA polymerase II promoter
E2RMA8	biological_process	GO:0021871	forebrain regionalization
E2RMA8	biological_process	GO:0021702	cerebellar Purkinje cell differentiation
E2RMA8	biological_process	GO:0009948	anterior/posterior axis specification
E2RMA8	biological_process	GO:0001657	ureteric bud development
P01270	molecular_function	GO:0051428	peptide hormone receptor binding
P01270	molecular_function	GO:0003705	RNA polymerase II distal enhancer sequence-specific DNA binding transcription factor activity
P01270	cellular_component	GO:0005576	extracellular region
P01270	biological_process	GO:0045453	bone resorption
P01270	biological_process	GO:0007186	G-protein coupled receptor signaling pathway
P01270	biological_process	GO:0010468	regulation of gene expression
P01270	biological_process	GO:0034645	cellular macromolecule biosynthetic process
P01270	biological_process	GO:0007267	cell-cell signaling
P01270	biological_process	GO:0046058	cAMP metabolic process
P01270	biological_process	GO:0000122	negative regulation of transcription from RNA polymerase II promoter
P01270	biological_process	GO:0046326	positive regulation of glucose import
P01270	biological_process	GO:0030501	positive regulation of bone mineralization
P01270	biological_process	GO:0045725	positive regulation of glycogen biosynthetic process
P01270	biological_process	GO:0045944	positive regulation of transcription from RNA polymerase II promoter
P01270	biological_process	GO:0008628	hormone-mediated apoptotic signaling pathway
P01270	biological_process	GO:0001501	skeletal system development
P01270	biological_process	GO:0006874	cellular calcium ion homeostasis
P01270	biological_process	GO:0030819	positive regulation of cAMP biosynthetic process
P04196	molecular_function	GO:0043498	cell surface binding
P04196	molecular_function	GO:0020037	heme binding
P04196	molecular_function	GO:0019865	immunoglobulin binding
P04196	molecular_function	GO:0043395	heparan sulfate proteoglycan binding
P04196	molecular_function	GO:0046872	metal ion binding
P04196	molecular_function	GO:0005515	protein binding
P04196	molecular_function	GO:0008201	heparin binding
P04196	molecular_function	GO:0008270	zinc ion binding
P04196	cellular_component	GO:0031093	platelet alpha granule lumen
P04196	cellular_component	GO:0005576	extracellular region
P04196	cellular_component	GO:0005886	plasma membrane
P04196	biological_process	GO:0010468	regulation of gene expression
P04196	biological_process	GO:0002839	positive regulation of immune response to tumor cell
P04196	biological_process	GO:0007596	blood coagulation
P04196	biological_process	GO:2000504	positive regulation of blood vessel remodeling
P04196	biological_process	GO:0007162	negative regulation of cell adhesion
P04196	biological_process	GO:0050730	regulation of peptidyl-tyrosine phosphorylation
P04196	biological_process	GO:0030168	platelet activation
P04196	biological_process	GO:0032956	regulation of actin cytoskeleton organization
P04196	biological_process	GO:0010543	regulation of platelet activation
P04196	biological_process	GO:0030193	regulation of blood coagulation
P04196	biological_process	GO:0043065	positive regulation of apoptotic process
P04196	biological_process	GO:0002576	platelet degranulation
P04196	biological_process	GO:0008285	negative regulation of cell proliferation
P04196	biological_process	GO:0050832	defense response to fungus
P04196	biological_process	GO:0030308	negative regulation of cell growth
P04196	biological_process	GO:0042730	fibrinolysis
P04196	biological_process	GO:1900747	negative regulation of vascular endothelial growth factor signaling pathway
P04196	biological_process	GO:2001027	negative regulation of endothelial cell chemotaxis
P04196	biological_process	GO:0051894	positive regulation of focal adhesion assembly
P04196	biological_process	GO:0043254	regulation of protein complex assembly
P04196	biological_process	GO:0016525	negative regulation of angiogenesis
P04196	biological_process	GO:0033629	negative regulation of cell adhesion mediated by integrin
P04196	biological_process	GO:0010593	negative regulation of lamellipodium assembly
P04196	biological_process	GO:0043537	negative regulation of blood vessel endothelial cell migration
P11802	molecular_function	GO:0005515	protein binding
P11802	molecular_function	GO:0004693	cyclin-dependent protein kinase activity
P11802	cellular_component	GO:0031965	nuclear membrane
P11802	cellular_component	GO:0005654	nucleoplasm
P11802	cellular_component	GO:0005634	nucleus
P11802	cellular_component	GO:0000307	cyclin-dependent protein kinase holoenzyme complex
P11802	cellular_component	GO:0005730	nucleolus
P11802	cellular_component	GO:0005829	cytosol
P11802	cellular_component	GO:0000785	chromatin
P11802	biological_process	GO:0042493	response to drug
P11802	biological_process	GO:0010468	regulation of gene expression
P11802	biological_process	GO:0000278	mitotic cell cycle
P11802	biological_process	GO:0000080	G1 phase of mitotic cell cycle
P11802	biological_process	GO:0048146	positive regulation of fibroblast proliferation
P11802	biological_process	GO:0006468	protein phosphorylation
P11802	biological_process	GO:0000084	S phase of mitotic cell cycle
P11802	biological_process	GO:0000082	G1/S transition of mitotic cell cycle
P11802	biological_process	GO:0008284	positive regulation of cell proliferation
P12272	molecular_function	GO:0051428	peptide hormone receptor binding
P12272	cellular_component	GO:0005634	nucleus
P12272	cellular_component	GO:0005615	extracellular space
P12272	cellular_component	GO:0005730	nucleolus
P12272	cellular_component	GO:0005794	Golgi apparatus
P12272	cellular_component	GO:0005576	extracellular region
P12272	cellular_component	GO:0005737	cytoplasm
P12272	biological_process	GO:0010468	regulation of gene expression
P12272	biological_process	GO:0007565	female pregnancy
P12272	biological_process	GO:0007267	cell-cell signaling
P12272	biological_process	GO:0046058	cAMP metabolic process
P12272	biological_process	GO:0032331	negative regulation of chondrocyte differentiation
P12272	biological_process	GO:0008544	epidermis development
P12272	biological_process	GO:0007189	adenylate cyclase-activating G-protein coupled receptor signaling pathway
P12272	biological_process	GO:0001501	skeletal system development
P12272	biological_process	GO:0030819	positive regulation of cAMP biosynthetic process
P12272	biological_process	GO:0008285	negative regulation of cell proliferation
P22301	molecular_function	GO:0008083	growth factor activity
P22301	molecular_function	GO:0005125	cytokine activity
P22301	molecular_function	GO:0005141	interleukin-10 receptor binding
P22301	cellular_component	GO:0005615	extracellular space
P22301	biological_process	GO:0010468	regulation of gene expression
P22301	biological_process	GO:0045191	regulation of isotype switching
P22301	biological_process	GO:0045347	negative regulation of MHC class II biosynthetic process
P22301	biological_process	GO:0002904	positive regulation of B cell apoptotic process
P22301	biological_process	GO:0071222	cellular response to lipopolysaccharide
P22301	biological_process	GO:0042092	type 2 immune response
P22301	biological_process	GO:0032715	negative regulation of interleukin-6 production
P22301	biological_process	GO:0007253	cytoplasmic sequestering of NF-kappaB
P22301	biological_process	GO:0002237	response to molecule of bacterial origin
P22301	biological_process	GO:0045893	positive regulation of transcription, DNA-dependent
P22301	biological_process	GO:0042130	negative regulation of T cell proliferation
P22301	biological_process	GO:0051091	positive regulation of sequence-specific DNA binding transcription factor activity
P22301	biological_process	GO:0002740	negative regulation of cytokine secretion involved in immune response
P22301	biological_process	GO:0030183	B cell differentiation
P22301	biological_process	GO:0051384	response to glucocorticoid stimulus
P22301	biological_process	GO:0032800	receptor biosynthetic process
P22301	biological_process	GO:0030097	hemopoiesis
P22301	biological_process	GO:0007267	cell-cell signaling
P22301	biological_process	GO:0030595	leukocyte chemotaxis
P22301	biological_process	GO:0043066	negative regulation of apoptotic process
P22301	biological_process	GO:0006954	inflammatory response
P22301	biological_process	GO:0045355	negative regulation of interferon-alpha biosynthetic process
P22301	biological_process	GO:0042100	B cell proliferation
P22301	biological_process	GO:0030889	negative regulation of B cell proliferation
P22301	biological_process	GO:0050715	positive regulation of cytokine secretion
P22301	biological_process	GO:0051045	negative regulation of membrane protein ectodomain proteolysis
P35226	molecular_function	GO:0071535	RING-like zinc finger domain binding
P35226	molecular_function	GO:0005515	protein binding
P35226	molecular_function	GO:0008270	zinc ion binding
P35226	cellular_component	GO:0035102	PRC1 complex
P35226	cellular_component	GO:0005634	nucleus
P35226	cellular_component	GO:0031519	PcG protein complex
P35226	cellular_component	GO:0005730	nucleolus
P35226	cellular_component	GO:0000151	ubiquitin ligase complex
P35226	biological_process	GO:0000122	negative regulation of transcription from RNA polymerase II promoter
P35226	biological_process	GO:0010468	regulation of gene expression
P35226	biological_process	GO:0048146	positive regulation of fibroblast proliferation
P35226	biological_process	GO:0007379	segment specification
P35226	biological_process	GO:0030097	hemopoiesis
P35226	biological_process	GO:0051443	positive regulation of ubiquitin-protein ligase activity
P35869	molecular_function	GO:0003677	DNA binding
P35869	molecular_function	GO:0046982	protein heterodimerization activity
P35869	molecular_function	GO:0044212	transcription regulatory region DNA binding
P35869	molecular_function	GO:0004879	ligand-activated sequence-specific DNA binding RNA polymerase II transcription factor activity
P35869	molecular_function	GO:0046983	protein dimerization activity
P35869	molecular_function	GO:0051879	Hsp90 protein binding
P35869	molecular_function	GO:0005515	protein binding
P35869	molecular_function	GO:0003700	sequence-specific DNA binding transcription factor activity
P35869	molecular_function	GO:0008134	transcription factor binding
P35869	cellular_component	GO:0005634	nucleus
P35869	cellular_component	GO:0005730	nucleolus
P35869	cellular_component	GO:0005667	transcription factor complex
P35869	cellular_component	GO:0034752	cytosolic aryl hydrocarbon receptor complex
P35869	cellular_component	GO:0005737	cytoplasm
P35869	biological_process	GO:0030888	regulation of B cell proliferation
P35869	biological_process	GO:0010468	regulation of gene expression
P35869	biological_process	GO:0006355	regulation of transcription, DNA-dependent
P35869	biological_process	GO:0009410	response to xenobiotic stimulus
P35869	biological_process	GO:0006950	response to stress
P35869	biological_process	GO:0006805	xenobiotic metabolic process
P35869	biological_process	GO:0001568	blood vessel development
P35869	biological_process	GO:0006915	apoptotic process
P35869	biological_process	GO:0006366	transcription from RNA polymerase II promoter
P35869	biological_process	GO:0030522	intracellular receptor mediated signaling pathway
P35869	biological_process	GO:0006357	regulation of transcription from RNA polymerase II promoter
P35869	biological_process	GO:0007049	cell cycle
P48431	molecular_function	GO:0003677	DNA binding
P48431	molecular_function	GO:0005515	protein binding
P48431	molecular_function	GO:0042802	identical protein binding
P48431	molecular_function	GO:0035198	miRNA binding
P48431	molecular_function	GO:0043565	sequence-specific DNA binding
P48431	molecular_function	GO:0044212	transcription regulatory region DNA binding
P48431	molecular_function	GO:0003700	sequence-specific DNA binding transcription factor activity
P48431	cellular_component	GO:0005634	nucleus
P48431	cellular_component	GO:0005829	cytosol
P48431	cellular_component	GO:0005667	transcription factor complex
P48431	cellular_component	GO:0005737	cytoplasm
P48431	biological_process	GO:0010468	regulation of gene expression
P48431	biological_process	GO:0001649	osteoblast differentiation
P48431	biological_process	GO:0001714	endodermal cell fate specification
P48431	biological_process	GO:0006355	regulation of transcription, DNA-dependent
P48431	biological_process	GO:0035019	somatic stem cell maintenance
P48431	biological_process	GO:0007050	cell cycle arrest
P48431	biological_process	GO:0045893	positive regulation of transcription, DNA-dependent
P48431	biological_process	GO:0090090	negative regulation of canonical Wnt receptor signaling pathway
P48431	biological_process	GO:0000122	negative regulation of transcription from RNA polymerase II promoter
P48431	biological_process	GO:0021983	pituitary gland development
P48431	biological_process	GO:0048839	inner ear development
P48431	biological_process	GO:0009611	response to wounding
P48431	biological_process	GO:0001654	eye development
P48431	biological_process	GO:0045665	negative regulation of neuron differentiation
P48431	biological_process	GO:0070848	response to growth factor stimulus
P48431	biological_process	GO:0030900	forebrain development
P48431	biological_process	GO:0006325	chromatin organization
P48431	biological_process	GO:0043281	regulation of cysteine-type endopeptidase activity involved in apoptotic process
P48431	biological_process	GO:0045944	positive regulation of transcription from RNA polymerase II promoter
P48431	biological_process	GO:0050680	negative regulation of epithelial cell proliferation
P48431	biological_process	GO:0021781	glial cell fate commitment
P48431	biological_process	GO:0043410	positive regulation of MAPK cascade
P48431	biological_process	GO:0097150	neuronal stem cell maintenance
P48742	molecular_function	GO:0003714	transcription corepressor activity
P48742	molecular_function	GO:0001071	nucleic acid binding transcription factor activity
P48742	cellular_component	GO:0005634	nucleus
P48742	cellular_component	GO:0043234	protein complex
P48742	biological_process	GO:0040019	positive regulation of embryonic development
P48742	biological_process	GO:0072050	S-shaped body morphogenesis
P48742	biological_process	GO:0060065	uterus development
P48742	biological_process	GO:0001705	ectoderm formation
P48742	biological_process	GO:0021937	cerebellar Purkinje cell-granule cell precursor cell signaling involved in regulation of granule cell precursor cell proliferation
P48742	biological_process	GO:0010842	retina layer formation
P48742	biological_process	GO:0021527	spinal cord association neuron differentiation
P48742	biological_process	GO:0060067	cervix development
P48742	biological_process	GO:0007389	pattern specification process
P48742	biological_process	GO:0072049	comma-shaped body morphogenesis
P48742	biological_process	GO:0009791	post-embryonic development
P48742	biological_process	GO:0035847	uterine epithelium development
P48742	biological_process	GO:0045892	negative regulation of transcription, DNA-dependent
P48742	biological_process	GO:0009653	anatomical structure morphogenesis
P48742	biological_process	GO:0009953	dorsal/ventral pattern formation
P48742	biological_process	GO:0001702	gastrulation with mouth forming second
P48742	biological_process	GO:0008045	motor neuron axon guidance
P48742	biological_process	GO:0048703	embryonic viscerocranium morphogenesis
P48742	biological_process	GO:0090190	positive regulation of branching involved in ureteric bud morphogenesis
P48742	biological_process	GO:0060322	head development
P48742	biological_process	GO:0001764	neuron migration
P48742	biological_process	GO:2000768	positive regulation of nephron tubule epithelial cell differentiation
P48742	biological_process	GO:0048646	anatomical structure formation involved in morphogenesis
P48742	biological_process	GO:0072178	nephric duct morphogenesis
P48742	biological_process	GO:0061205	paramesonephric duct development
P48742	biological_process	GO:0007399	nervous system development
P48742	biological_process	GO:0009952	anterior/posterior pattern specification
P48742	biological_process	GO:0060429	epithelium development
P48742	biological_process	GO:0010468	regulation of gene expression
P48742	biological_process	GO:0001822	kidney development
P48742	biological_process	GO:0060068	vagina development
P48742	biological_process	GO:0001706	endoderm formation
P48742	biological_process	GO:2000744	positive regulation of anterior head development
P48742	biological_process	GO:0045893	positive regulation of transcription, DNA-dependent
P48742	biological_process	GO:0090009	primitive streak formation
P48742	biological_process	GO:0009880	embryonic pattern specification
P48742	biological_process	GO:0072077	renal vesicle morphogenesis
P48742	biological_process	GO:0060066	oviduct development
P48742	biological_process	GO:0035846	oviduct epithelium development
P48742	biological_process	GO:2000543	positive regulation of gastrulation
P48742	biological_process	GO:0021549	cerebellum development
P48742	biological_process	GO:0001655	urogenital system development
P48742	biological_process	GO:0007267	cell-cell signaling
P48742	biological_process	GO:0060059	embryonic retina morphogenesis in camera-type eye
P48742	biological_process	GO:0006366	transcription from RNA polymerase II promoter
P48742	biological_process	GO:0021871	forebrain regionalization
P48742	biological_process	GO:0009887	organ morphogenesis
P48742	biological_process	GO:0021702	cerebellar Purkinje cell differentiation
P48742	biological_process	GO:0009948	anterior/posterior axis specification
P48742	biological_process	GO:0001657	ureteric bud development
P50238	molecular_function	GO:0008270	zinc ion binding
P50238	molecular_function	GO:0042277	peptide binding
P50238	molecular_function	GO:0003680	AT DNA binding
P50238	molecular_function	GO:0008301	DNA binding, bending
P50238	cellular_component	GO:0005737	cytoplasm
P50238	biological_process	GO:0010468	regulation of gene expression
P50238	biological_process	GO:0071236	cellular response to antibiotic
P50238	biological_process	GO:0007507	heart development
P50238	biological_process	GO:0060741	prostate gland stromal morphogenesis
P50238	biological_process	GO:0010043	response to zinc ion
P50238	biological_process	GO:0006915	apoptotic process
P50238	biological_process	GO:0008283	cell proliferation
P50238	biological_process	GO:0010033	response to organic substance
P50238	biological_process	GO:0006955	immune response
P50238	biological_process	GO:0071493	cellular response to UV-B
Q00534	molecular_function	GO:0005524	ATP binding
Q00534	molecular_function	GO:0005515	protein binding
Q00534	molecular_function	GO:0004693	cyclin-dependent protein kinase activity
Q00534	molecular_function	GO:0030332	cyclin binding
Q00534	cellular_component	GO:0001726	ruffle
Q00534	cellular_component	GO:0005634	nucleus
Q00534	cellular_component	GO:0000307	cyclin-dependent protein kinase holoenzyme complex
Q00534	cellular_component	GO:0005829	cytosol
Q00534	cellular_component	GO:0005737	cytoplasm
Q00534	biological_process	GO:0010468	regulation of gene expression
Q00534	biological_process	GO:0001954	positive regulation of cell-matrix adhesion
Q00534	biological_process	GO:0000080	G1 phase of mitotic cell cycle
Q00534	biological_process	GO:0000278	mitotic cell cycle
Q00534	biological_process	GO:0045786	negative regulation of cell cycle
Q00534	biological_process	GO:0045638	negative regulation of myeloid cell differentiation
Q00534	biological_process	GO:0048699	generation of neurons
Q00534	biological_process	GO:0007050	cell cycle arrest
Q00534	biological_process	GO:0014002	astrocyte development
Q00534	biological_process	GO:0043697	cell dedifferentiation
Q00534	biological_process	GO:0003323	type B pancreatic cell development
Q00534	biological_process	GO:0045668	negative regulation of osteoblast differentiation
Q00534	biological_process	GO:0008285	negative regulation of cell proliferation
Q00534	biological_process	GO:0045646	regulation of erythrocyte differentiation
Q00534	biological_process	GO:0021670	lateral ventricle development
Q00534	biological_process	GO:0042063	gliogenesis
Q00534	biological_process	GO:0048146	positive regulation of fibroblast proliferation
Q00534	biological_process	GO:0006468	protein phosphorylation
Q00534	biological_process	GO:0021542	dentate gyrus development
Q00534	biological_process	GO:2000145	regulation of cell motility
Q00534	biological_process	GO:0050680	negative regulation of epithelial cell proliferation
Q00534	biological_process	GO:0000082	G1/S transition of mitotic cell cycle
Q00534	biological_process	GO:0045596	negative regulation of cell differentiation
Q00534	biological_process	GO:0009615	response to virus
Q00534	biological_process	GO:2000773	negative regulation of cellular senescence
Q01860	molecular_function	GO:0003677	DNA binding
Q01860	molecular_function	GO:0000981	sequence-specific DNA binding RNA polymerase II transcription factor activity
Q01860	molecular_function	GO:0031625	ubiquitin protein ligase binding
Q01860	molecular_function	GO:0044212	transcription regulatory region DNA binding
Q01860	molecular_function	GO:0005515	protein binding
Q01860	molecular_function	GO:0035198	miRNA binding
Q01860	molecular_function	GO:0043565	sequence-specific DNA binding
Q01860	molecular_function	GO:0003700	sequence-specific DNA binding transcription factor activity
Q01860	molecular_function	GO:0008134	transcription factor binding
Q01860	cellular_component	GO:0005654	nucleoplasm
Q01860	cellular_component	GO:0005634	nucleus
Q01860	cellular_component	GO:0005829	cytosol
Q01860	cellular_component	GO:0005667	transcription factor complex
Q01860	cellular_component	GO:0005737	cytoplasm
Q01860	biological_process	GO:0009786	regulation of asymmetric cell division
Q01860	biological_process	GO:0010468	regulation of gene expression
Q01860	biological_process	GO:0001714	endodermal cell fate specification
Q01860	biological_process	GO:0006355	regulation of transcription, DNA-dependent
Q01860	biological_process	GO:0060965	negative regulation of gene silencing by miRNA
Q01860	biological_process	GO:0035019	somatic stem cell maintenance
Q01860	biological_process	GO:0042789	mRNA transcription from RNA polymerase II promoter
Q01860	biological_process	GO:0001824	blastocyst development
Q01860	biological_process	GO:0060795	cell fate commitment involved in formation of primary germ layer
Q01860	biological_process	GO:0090308	regulation of methylation-dependent chromatin silencing
Q01860	biological_process	GO:0090081	regulation of heart induction by regulation of canonical Wnt receptor signaling pathway
Q01860	biological_process	GO:0009611	response to wounding
Q01860	biological_process	GO:0009653	anatomical structure morphogenesis
Q01860	biological_process	GO:0060391	positive regulation of SMAD protein import into nucleus
Q01860	biological_process	GO:0035413	positive regulation of catenin import into nucleus
Q01860	biological_process	GO:0006366	transcription from RNA polymerase II promoter
Q01860	biological_process	GO:0060913	cardiac cell fate determination
Q01860	biological_process	GO:0045944	positive regulation of transcription from RNA polymerase II promoter
Q01860	biological_process	GO:0003130	BMP signaling pathway involved in heart induction
Q14207	molecular_function	GO:0008022	protein C-terminus binding
Q14207	molecular_function	GO:0005515	protein binding
Q14207	molecular_function	GO:0003714	transcription corepressor activity
Q14207	molecular_function	GO:0003713	transcription coactivator activity
Q14207	molecular_function	GO:0047485	protein N-terminus binding
Q14207	molecular_function	GO:0003700	sequence-specific DNA binding transcription factor activity
Q14207	cellular_component	GO:0005634	nucleus
Q14207	cellular_component	GO:0015030	Cajal body
Q14207	cellular_component	GO:0044428	nuclear part
Q14207	biological_process	GO:0010468	regulation of gene expression
Q14207	biological_process	GO:0000083	regulation of transcription involved in G1/S phase of mitotic cell cycle
Q14207	biological_process	GO:0045893	positive regulation of transcription, DNA-dependent
Q16665	molecular_function	GO:0042802	identical protein binding
Q16665	molecular_function	GO:0046982	protein heterodimerization activity
Q16665	molecular_function	GO:0031625	ubiquitin protein ligase binding
Q16665	molecular_function	GO:0044212	transcription regulatory region DNA binding
Q16665	molecular_function	GO:0003705	RNA polymerase II distal enhancer sequence-specific DNA binding transcription factor activity
Q16665	molecular_function	GO:0019901	protein kinase binding
Q16665	molecular_function	GO:0051879	Hsp90 protein binding
Q16665	molecular_function	GO:0005515	protein binding
Q16665	molecular_function	GO:0043565	sequence-specific DNA binding
Q16665	molecular_function	GO:0003700	sequence-specific DNA binding transcription factor activity
Q16665	molecular_function	GO:0008134	transcription factor binding
Q16665	molecular_function	GO:0019899	enzyme binding
Q16665	molecular_function	GO:0035035	histone acetyltransferase binding
Q16665	cellular_component	GO:0005654	nucleoplasm
Q16665	cellular_component	GO:0005634	nucleus
Q16665	cellular_component	GO:0005730	nucleolus
Q16665	cellular_component	GO:0005829	cytosol
Q16665	cellular_component	GO:0005667	transcription factor complex
Q16665	cellular_component	GO:0005737	cytoplasm
Q16665	biological_process	GO:0051541	elastin metabolic process
Q16665	biological_process	GO:0033554	cellular response to stress
Q16665	biological_process	GO:0045821	positive regulation of glycolysis
Q16665	biological_process	GO:0010573	vascular endothelial growth factor production
Q16665	biological_process	GO:0071347	cellular response to interleukin-1
Q16665	biological_process	GO:0045766	positive regulation of angiogenesis
Q16665	biological_process	GO:0001837	epithelial to mesenchymal transition
Q16665	biological_process	GO:0007165	signal transduction
Q16665	biological_process	GO:0061419	positive regulation of transcription from RNA polymerase II promoter in response to hypoxia
Q16665	biological_process	GO:0001666	response to hypoxia
Q16665	biological_process	GO:0045648	positive regulation of erythrocyte differentiation
Q16665	biological_process	GO:0045944	positive regulation of transcription from RNA polymerase II promoter
Q16665	biological_process	GO:0007219	Notch signaling pathway
Q16665	biological_process	GO:0010870	positive regulation of receptor biosynthetic process
Q16665	biological_process	GO:0019896	axon transport of mitochondrion
Q16665	biological_process	GO:0071456	cellular response to hypoxia
Q16665	biological_process	GO:0010468	regulation of gene expression
Q16665	biological_process	GO:0051000	positive regulation of nitric-oxide synthase activity
Q16665	biological_process	GO:0046886	positive regulation of hormone biosynthetic process
Q16665	biological_process	GO:0006355	regulation of transcription, DNA-dependent
Q16665	biological_process	GO:0010575	positive regulation vascular endothelial growth factor production
Q16665	biological_process	GO:0032909	regulation of transforming growth factor beta2 production
Q16665	biological_process	GO:0042789	mRNA transcription from RNA polymerase II promoter
Q16665	biological_process	GO:0045893	positive regulation of transcription, DNA-dependent
Q16665	biological_process	GO:0032364	oxygen homeostasis
Q16665	biological_process	GO:0010634	positive regulation of epithelial cell migration
Q16665	biological_process	GO:0043619	regulation of transcription from RNA polymerase II promoter in response to oxidative stress
Q16665	biological_process	GO:0061418	regulation of transcription from RNA polymerase II promoter in response to hypoxia
Q16665	biological_process	GO:0001938	positive regulation of endothelial cell proliferation
Q16665	biological_process	GO:0070101	positive regulation of chemokine-mediated signaling pathway
Q16665	biological_process	GO:0030949	positive regulation of vascular endothelial growth factor receptor signaling pathway
Q16665	biological_process	GO:0032963	collagen metabolic process
Q16665	biological_process	GO:0032722	positive regulation of chemokine production
Q16665	biological_process	GO:0002248	connective tissue replacement involved in inflammatory response wound healing
Q6RFH8	molecular_function	GO:0005515	protein binding
Q6RFH8	cellular_component	GO:0005634	nucleus
Q6RFH8	biological_process	GO:0010468	regulation of gene expression
Q6RFH8	biological_process	GO:0008283	cell proliferation
Q6UW56	molecular_function	GO:0005515	protein binding
Q6UW56	cellular_component	GO:0005635	nuclear envelope
Q6UW56	cellular_component	GO:0048471	perinuclear region of cytoplasm
Q6UW56	biological_process	GO:0033689	negative regulation of osteoblast proliferation
Q6UW56	biological_process	GO:0030501	positive regulation of bone mineralization
Q6UW56	biological_process	GO:0010468	regulation of gene expression
Q6UW56	biological_process	GO:2000599	negative regulation of cyclin catabolic process
Q6UW56	biological_process	GO:0045669	positive regulation of osteoblast differentiation
Q92786	molecular_function	GO:0003677	DNA binding
Q92786	molecular_function	GO:0003714	transcription corepressor activity
Q92786	molecular_function	GO:0044212	transcription regulatory region DNA binding
Q92786	molecular_function	GO:0003705	RNA polymerase II distal enhancer sequence-specific DNA binding transcription factor activity
Q92786	molecular_function	GO:0016922	ligand-dependent nuclear receptor binding
Q92786	molecular_function	GO:0050693	LBD domain binding
Q92786	molecular_function	GO:0050692	DBD domain binding
Q92786	molecular_function	GO:0005515	protein binding
Q92786	molecular_function	GO:0003700	sequence-specific DNA binding transcription factor activity
Q92786	cellular_component	GO:0005634	nucleus
Q92786	cellular_component	GO:0005737	cytoplasm
Q92786	biological_process	GO:0060412	ventricular septum morphogenesis
Q92786	biological_process	GO:0043433	negative regulation of sequence-specific DNA binding transcription factor activity
Q92786	biological_process	GO:0021516	dorsal spinal cord development
Q92786	biological_process	GO:0060042	retina morphogenesis in camera-type eye
Q92786	biological_process	GO:0010595	positive regulation of endothelial cell migration
Q92786	biological_process	GO:0060836	lymphatic endothelial cell differentiation
Q92786	biological_process	GO:0007420	brain development
Q92786	biological_process	GO:0060298	positive regulation of sarcomere organization
Q92786	biological_process	GO:0021915	neural tube development
Q92786	biological_process	GO:0046619	optic placode formation involved in camera-type eye formation
Q92786	biological_process	GO:0002088	lens development in camera-type eye
Q92786	biological_process	GO:0008285	negative regulation of cell proliferation
Q92786	biological_process	GO:0045892	negative regulation of transcription, DNA-dependent
Q92786	biological_process	GO:0045750	positive regulation of S phase of mitotic cell cycle
Q92786	biological_process	GO:0055010	ventricular cardiac muscle tissue morphogenesis
Q92786	biological_process	GO:0021542	dentate gyrus development
Q92786	biological_process	GO:2000979	positive regulation of forebrain neuron differentiation
Q92786	biological_process	GO:0055009	atrial cardiac muscle tissue morphogenesis
Q92786	biological_process	GO:0030910	olfactory placode formation
Q92786	biological_process	GO:0048845	venous blood vessel morphogenesis
Q92786	biological_process	GO:0060849	regulation of transcription involved in lymphatic endothelial cell fate commitment
Q92786	biological_process	GO:0097150	neuronal stem cell maintenance
Q92786	biological_process	GO:0045787	positive regulation of cell cycle
Q92786	biological_process	GO:0030240	skeletal muscle thin filament assembly
Q92786	biological_process	GO:0030324	lung development
Q92786	biological_process	GO:0010468	regulation of gene expression
Q92786	biological_process	GO:0043049	otic placode formation
Q92786	biological_process	GO:0001822	kidney development
Q92786	biological_process	GO:0045737	positive regulation of cyclin-dependent protein kinase activity
Q92786	biological_process	GO:0045893	positive regulation of transcription, DNA-dependent
Q92786	biological_process	GO:0000122	negative regulation of transcription from RNA polymerase II promoter
Q92786	biological_process	GO:0060214	endocardium formation
Q92786	biological_process	GO:0045071	negative regulation of viral genome replication
Q92786	biological_process	GO:0001938	positive regulation of endothelial cell proliferation
Q92786	biological_process	GO:0060421	positive regulation of heart growth
Q92786	biological_process	GO:0070365	hepatocyte differentiation
Q92786	biological_process	GO:0001889	liver development
Q92786	biological_process	GO:0070309	lens fiber cell morphogenesis
Q92786	biological_process	GO:0060414	aorta smooth muscle tissue morphogenesis
Q92786	biological_process	GO:0060059	embryonic retina morphogenesis in camera-type eye
Q92786	biological_process	GO:0055005	ventricular cardiac myofibril development
Q92786	biological_process	GO:0021707	cerebellar granule cell differentiation
Q92786	biological_process	GO:2000179	positive regulation of neural precursor cell proliferation
Q92786	biological_process	GO:0031016	pancreas development
Q92786	biological_process	GO:0070858	negative regulation of bile acid biosynthetic process
Q92786	biological_process	GO:0001946	lymphangiogenesis
Q92786	biological_process	GO:0008284	positive regulation of cell proliferation
Q92832	molecular_function	GO:0005515	protein binding
Q92832	cellular_component	GO:0005635	nuclear envelope
Q92832	cellular_component	GO:0005737	cytoplasm
Q92832	cellular_component	GO:0048471	perinuclear region of cytoplasm
Q92832	biological_process	GO:0033689	negative regulation of osteoblast proliferation
Q92832	biological_process	GO:0007399	nervous system development
Q92832	biological_process	GO:0030501	positive regulation of bone mineralization
Q92832	biological_process	GO:0010468	regulation of gene expression
Q92832	biological_process	GO:2000599	negative regulation of cyclin catabolic process
Q92832	biological_process	GO:0045669	positive regulation of osteoblast differentiation
Q99523	molecular_function	GO:0030379	neurotensin receptor activity, non-G-protein coupled
Q99523	molecular_function	GO:0048406	nerve growth factor binding
Q99523	molecular_function	GO:0010465	nerve growth factor receptor activity
Q99523	molecular_function	GO:0019899	enzyme binding
Q99523	cellular_component	GO:0030136	clathrin-coated vesicle
Q99523	cellular_component	GO:0016023	cytoplasmic membrane-bounded vesicle
Q99523	cellular_component	GO:0005737	cytoplasm
Q99523	cellular_component	GO:0048471	perinuclear region of cytoplasm
Q99523	cellular_component	GO:0005768	endosome
Q99523	cellular_component	GO:0009986	cell surface
Q99523	cellular_component	GO:0005794	Golgi apparatus
Q99523	cellular_component	GO:0005905	coated pit
Q99523	cellular_component	GO:0016021	integral to membrane
Q99523	cellular_component	GO:0005769	early endosome
Q99523	cellular_component	GO:0005886	plasma membrane
Q99523	biological_process	GO:0010468	regulation of gene expression
Q99523	biological_process	GO:0051005	negative regulation of lipoprotein lipase activity
Q99523	biological_process	GO:0014902	myotube differentiation
Q99523	biological_process	GO:0097190	apoptotic signaling pathway
Q99523	biological_process	GO:0048011	nerve growth factor receptor signaling pathway
Q99523	biological_process	GO:0006895	Golgi to endosome transport
Q99523	biological_process	GO:0032509	endosome transport via multivesicular body sorting pathway
Q99523	biological_process	GO:0016050	vesicle organization
Q99523	biological_process	GO:0006897	endocytosis
Q99523	biological_process	GO:0008333	endosome to lysosome transport
Q99523	biological_process	GO:0007218	neuropeptide signaling pathway
Q99523	biological_process	GO:0007186	G-protein coupled receptor signaling pathway
Q99523	biological_process	GO:0032868	response to insulin stimulus
Q99523	biological_process	GO:0043066	negative regulation of apoptotic process
Q99523	biological_process	GO:0046323	glucose import
Q99523	biological_process	GO:0048227	plasma membrane to endosome transport
Q9BQA5	molecular_function	GO:0042393	histone binding
Q9BQA5	molecular_function	GO:0003677	DNA binding
Q9BQA5	molecular_function	GO:0005515	protein binding
Q9BQA5	molecular_function	GO:0003713	transcription coactivator activity
Q9BQA5	molecular_function	GO:0044212	transcription regulatory region DNA binding
Q9BQA5	molecular_function	GO:0019899	enzyme binding
Q9BQA5	molecular_function	GO:0003700	sequence-specific DNA binding transcription factor activity
Q9BQA5	cellular_component	GO:0005654	nucleoplasm
Q9BQA5	cellular_component	GO:0005634	nucleus
Q9BQA5	cellular_component	GO:0005730	nucleolus
Q9BQA5	cellular_component	GO:0015030	Cajal body
Q9BQA5	biological_process	GO:0045892	negative regulation of transcription, DNA-dependent
Q9BQA5	biological_process	GO:0045184	establishment of protein localization
Q9BQA5	biological_process	GO:0010468	regulation of gene expression
Q9BQA5	biological_process	GO:0006281	DNA repair
Q9BQA5	biological_process	GO:0006355	regulation of transcription, DNA-dependent
Q9BQA5	biological_process	GO:0000077	DNA damage checkpoint
Q9BQA5	biological_process	GO:0010629	negative regulation of gene expression
Q9BQA5	biological_process	GO:0001701	in utero embryonic development
Q9BQA5	biological_process	GO:0010628	positive regulation of gene expression
Q9BQA5	biological_process	GO:0045893	positive regulation of transcription, DNA-dependent
Q9BQA5	biological_process	GO:0045445	myoblast differentiation
Q9BQA5	biological_process	GO:0000083	regulation of transcription involved in G1/S phase of mitotic cell cycle
Q9BQA5	biological_process	GO:0000082	G1/S transition of mitotic cell cycle
Q9H9S0	molecular_function	GO:0003677	DNA binding
Q9H9S0	molecular_function	GO:0003714	transcription corepressor activity
Q9H9S0	molecular_function	GO:0003700	sequence-specific DNA binding transcription factor activity
Q9H9S0	cellular_component	GO:0005634	nucleus
Q9H9S0	cellular_component	GO:0005730	nucleolus
Q9H9S0	biological_process	GO:0010468	regulation of gene expression
Q9H9S0	biological_process	GO:0001714	endodermal cell fate specification
Q9H9S0	biological_process	GO:0030154	cell differentiation
Q9H9S0	biological_process	GO:0006355	regulation of transcription, DNA-dependent
Q9H9S0	biological_process	GO:0035019	somatic stem cell maintenance
Q9H9S0	biological_process	GO:0008283	cell proliferation
Q9H9S0	biological_process	GO:0045944	positive regulation of transcription from RNA polymerase II promoter
Q9H9S0	biological_process	GO:0009790	embryo development
Q9H9S0	biological_process	GO:0045595	regulation of cell differentiation
Q9Y4F3	cellular_component	GO:0005777	peroxisome
Q9Y4F3	biological_process	GO:0010468	regulation of gene expression
Q9Y4F3	biological_process	GO:0048477	oogenesis
Q9Y4F3	biological_process	GO:0007143	female meiosis
Q9Y4F3	biological_process	GO:0010923	negative regulation of phosphatase activity
B7ZP59	molecular_function	GO:0003714	transcription corepressor activity
B7ZP59	molecular_function	GO:0001071	nucleic acid binding transcription factor activity
B7ZP59	cellular_component	GO:0005634	nucleus
B7ZP59	cellular_component	GO:0043234	protein complex
B7ZP59	biological_process	GO:0040019	positive regulation of embryonic development
B7ZP59	biological_process	GO:0072050	S-shaped body morphogenesis
B7ZP59	biological_process	GO:0001705	ectoderm formation
B7ZP59	biological_process	GO:0021937	cerebellar Purkinje cell-granule cell precursor cell signaling involved in regulation of granule cell precursor cell proliferation
B7ZP59	biological_process	GO:0010842	retina layer formation
B7ZP59	biological_process	GO:0021527	spinal cord association neuron differentiation
B7ZP59	biological_process	GO:0007389	pattern specification process
B7ZP59	biological_process	GO:0072049	comma-shaped body morphogenesis
B7ZP59	biological_process	GO:0009791	post-embryonic development
B7ZP59	biological_process	GO:0045892	negative regulation of transcription, DNA-dependent
B7ZP59	biological_process	GO:0009653	anatomical structure morphogenesis
B7ZP59	biological_process	GO:0009953	dorsal/ventral pattern formation
B7ZP59	biological_process	GO:0001702	gastrulation with mouth forming second
B7ZP59	biological_process	GO:0008045	motor neuron axon guidance
B7ZP59	biological_process	GO:0048703	embryonic viscerocranium morphogenesis
B7ZP59	biological_process	GO:0090190	positive regulation of branching involved in ureteric bud morphogenesis
B7ZP59	biological_process	GO:0060322	head development
B7ZP59	biological_process	GO:0001764	neuron migration
B7ZP59	biological_process	GO:2000768	positive regulation of nephron tubule epithelial cell differentiation
B7ZP59	biological_process	GO:0048646	anatomical structure formation involved in morphogenesis
B7ZP59	biological_process	GO:0072178	nephric duct morphogenesis
B7ZP59	biological_process	GO:0061205	paramesonephric duct development
B7ZP59	biological_process	GO:0009952	anterior/posterior pattern specification
B7ZP59	biological_process	GO:0010468	regulation of gene expression
B7ZP59	biological_process	GO:0060429	epithelium development
B7ZP59	biological_process	GO:0001822	kidney development
B7ZP59	biological_process	GO:0001706	endoderm formation
B7ZP59	biological_process	GO:2000744	positive regulation of anterior head development
B7ZP59	biological_process	GO:0045893	positive regulation of transcription, DNA-dependent
B7ZP59	biological_process	GO:0090009	primitive streak formation
B7ZP59	biological_process	GO:0009880	embryonic pattern specification
B7ZP59	biological_process	GO:0072077	renal vesicle morphogenesis
B7ZP59	biological_process	GO:2000543	positive regulation of gastrulation
B7ZP59	biological_process	GO:0021549	cerebellum development
B7ZP59	biological_process	GO:0001655	urogenital system development
B7ZP59	biological_process	GO:0007267	cell-cell signaling
B7ZP59	biological_process	GO:0060059	embryonic retina morphogenesis in camera-type eye
B7ZP59	biological_process	GO:0006366	transcription from RNA polymerase II promoter
B7ZP59	biological_process	GO:0021871	forebrain regionalization
B7ZP59	biological_process	GO:0021702	cerebellar Purkinje cell differentiation
B7ZP59	biological_process	GO:0009948	anterior/posterior axis specification
B7ZP59	biological_process	GO:0001657	ureteric bud development
O53730	molecular_function	GO:0005515	protein binding
O53730	cellular_component	GO:0005618	cell wall
O53730	cellular_component	GO:0005886	plasma membrane
O53730	biological_process	GO:0019217	regulation of fatty acid metabolic process
O53730	biological_process	GO:0010468	regulation of gene expression
P63008	molecular_function	GO:0003714	transcription corepressor activity
P63008	molecular_function	GO:0001071	nucleic acid binding transcription factor activity
P63008	cellular_component	GO:0005634	nucleus
P63008	cellular_component	GO:0043234	protein complex
P63008	biological_process	GO:0040019	positive regulation of embryonic development
P63008	biological_process	GO:0072050	S-shaped body morphogenesis
P63008	biological_process	GO:0060065	uterus development
P63008	biological_process	GO:0001705	ectoderm formation
P63008	biological_process	GO:0021937	cerebellar Purkinje cell-granule cell precursor cell signaling involved in regulation of granule cell precursor cell proliferation
P63008	biological_process	GO:0010842	retina layer formation
P63008	biological_process	GO:0021527	spinal cord association neuron differentiation
P63008	biological_process	GO:0060067	cervix development
P63008	biological_process	GO:0007389	pattern specification process
P63008	biological_process	GO:0072049	comma-shaped body morphogenesis
P63008	biological_process	GO:0009791	post-embryonic development
P63008	biological_process	GO:0035847	uterine epithelium development
P63008	biological_process	GO:0045892	negative regulation of transcription, DNA-dependent
P63008	biological_process	GO:0009653	anatomical structure morphogenesis
P63008	biological_process	GO:0009953	dorsal/ventral pattern formation
P63008	biological_process	GO:0001702	gastrulation with mouth forming second
P63008	biological_process	GO:0008045	motor neuron axon guidance
P63008	biological_process	GO:0048703	embryonic viscerocranium morphogenesis
P63008	biological_process	GO:0090190	positive regulation of branching involved in ureteric bud morphogenesis
P63008	biological_process	GO:0060322	head development
P63008	biological_process	GO:0001764	neuron migration
P63008	biological_process	GO:2000768	positive regulation of nephron tubule epithelial cell differentiation
P63008	biological_process	GO:0048646	anatomical structure formation involved in morphogenesis
P63008	biological_process	GO:0072178	nephric duct morphogenesis
P63008	biological_process	GO:0061205	paramesonephric duct development
P63008	biological_process	GO:0009952	anterior/posterior pattern specification
P63008	biological_process	GO:0060429	epithelium development
P63008	biological_process	GO:0010468	regulation of gene expression
P63008	biological_process	GO:0001822	kidney development
P63008	biological_process	GO:0060068	vagina development
P63008	biological_process	GO:0001706	endoderm formation
P63008	biological_process	GO:2000744	positive regulation of anterior head development
P63008	biological_process	GO:0045893	positive regulation of transcription, DNA-dependent
P63008	biological_process	GO:0090009	primitive streak formation
P63008	biological_process	GO:0009880	embryonic pattern specification
P63008	biological_process	GO:0072077	renal vesicle morphogenesis
P63008	biological_process	GO:0060066	oviduct development
P63008	biological_process	GO:0035846	oviduct epithelium development
P63008	biological_process	GO:2000543	positive regulation of gastrulation
P63008	biological_process	GO:0021549	cerebellum development
P63008	biological_process	GO:0001655	urogenital system development
P63008	biological_process	GO:0007267	cell-cell signaling
P63008	biological_process	GO:0060059	embryonic retina morphogenesis in camera-type eye
P63008	biological_process	GO:0006366	transcription from RNA polymerase II promoter
P63008	biological_process	GO:0021871	forebrain regionalization
P63008	biological_process	GO:0021702	cerebellar Purkinje cell differentiation
P63008	biological_process	GO:0009948	anterior/posterior axis specification
P63008	biological_process	GO:0001657	ureteric bud development
P67731	molecular_function	GO:0003677	DNA binding
P67731	molecular_function	GO:0046870	cadmium ion binding
P67731	molecular_function	GO:0097063	cadmium ion sensor activity
P67731	molecular_function	GO:0032791	lead ion binding
P67731	molecular_function	GO:0042803	protein homodimerization activity
P67731	molecular_function	GO:0003700	sequence-specific DNA binding transcription factor activity
P67731	biological_process	GO:0046686	response to cadmium ion
P67731	biological_process	GO:0010468	regulation of gene expression
P67731	biological_process	GO:0010288	response to lead ion
P67731	biological_process	GO:0051260	protein homooligomerization
P96839	molecular_function	GO:0003677	DNA binding
P96839	molecular_function	GO:0042803	protein homodimerization activity
P96839	biological_process	GO:0019217	regulation of fatty acid metabolic process
P96839	biological_process	GO:0010468	regulation of gene expression
P96839	biological_process	GO:0006355	regulation of transcription, DNA-dependent
Q28640	molecular_function	GO:0043498	cell surface binding
Q28640	molecular_function	GO:0020037	heme binding
Q28640	molecular_function	GO:0019865	immunoglobulin binding
Q28640	molecular_function	GO:0043395	heparan sulfate proteoglycan binding
Q28640	molecular_function	GO:0046872	metal ion binding
Q28640	molecular_function	GO:0005515	protein binding
Q28640	molecular_function	GO:0008201	heparin binding
Q28640	molecular_function	GO:0008270	zinc ion binding
Q28640	biological_process	GO:0010468	regulation of gene expression
Q28640	biological_process	GO:0002839	positive regulation of immune response to tumor cell
Q28640	biological_process	GO:2000504	positive regulation of blood vessel remodeling
Q28640	biological_process	GO:0007162	negative regulation of cell adhesion
Q28640	biological_process	GO:0050730	regulation of peptidyl-tyrosine phosphorylation
Q28640	biological_process	GO:0030168	platelet activation
Q28640	biological_process	GO:0032956	regulation of actin cytoskeleton organization
Q28640	biological_process	GO:0010543	regulation of platelet activation
Q28640	biological_process	GO:0030193	regulation of blood coagulation
Q28640	biological_process	GO:0043065	positive regulation of apoptotic process
Q28640	biological_process	GO:0008285	negative regulation of cell proliferation
Q28640	biological_process	GO:0050832	defense response to fungus
Q28640	biological_process	GO:0030308	negative regulation of cell growth
Q28640	biological_process	GO:1900747	negative regulation of vascular endothelial growth factor signaling pathway
Q28640	biological_process	GO:2001027	negative regulation of endothelial cell chemotaxis
Q28640	biological_process	GO:0051894	positive regulation of focal adhesion assembly
Q28640	biological_process	GO:0016525	negative regulation of angiogenesis
Q28640	biological_process	GO:0033629	negative regulation of cell adhesion mediated by integrin
Q28640	biological_process	GO:0043254	regulation of protein complex assembly
Q28640	biological_process	GO:0010593	negative regulation of lamellipodium assembly
Q28640	biological_process	GO:0010755	regulation of plasminogen activation
Q28640	biological_process	GO:0043537	negative regulation of blood vessel endothelial cell migration
Q5IS44	molecular_function	GO:0003714	transcription corepressor activity
Q5IS44	molecular_function	GO:0001071	nucleic acid binding transcription factor activity
Q5IS44	cellular_component	GO:0005634	nucleus
Q5IS44	cellular_component	GO:0043234	protein complex
Q5IS44	biological_process	GO:0040019	positive regulation of embryonic development
Q5IS44	biological_process	GO:0072050	S-shaped body morphogenesis
Q5IS44	biological_process	GO:0060065	uterus development
Q5IS44	biological_process	GO:0001705	ectoderm formation
Q5IS44	biological_process	GO:0021937	cerebellar Purkinje cell-granule cell precursor cell signaling involved in regulation of granule cell precursor cell proliferation
Q5IS44	biological_process	GO:0010842	retina layer formation
Q5IS44	biological_process	GO:0021527	spinal cord association neuron differentiation
Q5IS44	biological_process	GO:0060067	cervix development
Q5IS44	biological_process	GO:0007389	pattern specification process
Q5IS44	biological_process	GO:0072049	comma-shaped body morphogenesis
Q5IS44	biological_process	GO:0009791	post-embryonic development
Q5IS44	biological_process	GO:0035847	uterine epithelium development
Q5IS44	biological_process	GO:0045892	negative regulation of transcription, DNA-dependent
Q5IS44	biological_process	GO:0009653	anatomical structure morphogenesis
Q5IS44	biological_process	GO:0009953	dorsal/ventral pattern formation
Q5IS44	biological_process	GO:0001702	gastrulation with mouth forming second
Q5IS44	biological_process	GO:0008045	motor neuron axon guidance
Q5IS44	biological_process	GO:0048703	embryonic viscerocranium morphogenesis
Q5IS44	biological_process	GO:0090190	positive regulation of branching involved in ureteric bud morphogenesis
Q5IS44	biological_process	GO:0060322	head development
Q5IS44	biological_process	GO:0001764	neuron migration
Q5IS44	biological_process	GO:2000768	positive regulation of nephron tubule epithelial cell differentiation
Q5IS44	biological_process	GO:0048646	anatomical structure formation involved in morphogenesis
Q5IS44	biological_process	GO:0072178	nephric duct morphogenesis
Q5IS44	biological_process	GO:0061205	paramesonephric duct development
Q5IS44	biological_process	GO:0009952	anterior/posterior pattern specification
Q5IS44	biological_process	GO:0060429	epithelium development
Q5IS44	biological_process	GO:0010468	regulation of gene expression
Q5IS44	biological_process	GO:0001822	kidney development
Q5IS44	biological_process	GO:0060068	vagina development
Q5IS44	biological_process	GO:0001706	endoderm formation
Q5IS44	biological_process	GO:2000744	positive regulation of anterior head development
Q5IS44	biological_process	GO:0045893	positive regulation of transcription, DNA-dependent
Q5IS44	biological_process	GO:0090009	primitive streak formation
Q5IS44	biological_process	GO:0009880	embryonic pattern specification
Q5IS44	biological_process	GO:0072077	renal vesicle morphogenesis
Q5IS44	biological_process	GO:0060066	oviduct development
Q5IS44	biological_process	GO:0035846	oviduct epithelium development
Q5IS44	biological_process	GO:2000543	positive regulation of gastrulation
Q5IS44	biological_process	GO:0021549	cerebellum development
Q5IS44	biological_process	GO:0001655	urogenital system development
Q5IS44	biological_process	GO:0007267	cell-cell signaling
Q5IS44	biological_process	GO:0060059	embryonic retina morphogenesis in camera-type eye
Q5IS44	biological_process	GO:0006366	transcription from RNA polymerase II promoter
Q5IS44	biological_process	GO:0021871	forebrain regionalization
Q5IS44	biological_process	GO:0021702	cerebellar Purkinje cell differentiation
Q5IS44	biological_process	GO:0009948	anterior/posterior axis specification
Q5IS44	biological_process	GO:0001657	ureteric bud development
Q5IS89	molecular_function	GO:0003714	transcription corepressor activity
Q5IS89	molecular_function	GO:0001071	nucleic acid binding transcription factor activity
Q5IS89	cellular_component	GO:0005634	nucleus
Q5IS89	cellular_component	GO:0043234	protein complex
Q5IS89	biological_process	GO:0040019	positive regulation of embryonic development
Q5IS89	biological_process	GO:0072050	S-shaped body morphogenesis
Q5IS89	biological_process	GO:0060065	uterus development
Q5IS89	biological_process	GO:0001705	ectoderm formation
Q5IS89	biological_process	GO:0021937	cerebellar Purkinje cell-granule cell precursor cell signaling involved in regulation of granule cell precursor cell proliferation
Q5IS89	biological_process	GO:0010842	retina layer formation
Q5IS89	biological_process	GO:0021527	spinal cord association neuron differentiation
Q5IS89	biological_process	GO:0060067	cervix development
Q5IS89	biological_process	GO:0007389	pattern specification process
Q5IS89	biological_process	GO:0072049	comma-shaped body morphogenesis
Q5IS89	biological_process	GO:0009791	post-embryonic development
Q5IS89	biological_process	GO:0035847	uterine epithelium development
Q5IS89	biological_process	GO:0045892	negative regulation of transcription, DNA-dependent
Q5IS89	biological_process	GO:0009653	anatomical structure morphogenesis
Q5IS89	biological_process	GO:0009953	dorsal/ventral pattern formation
Q5IS89	biological_process	GO:0001702	gastrulation with mouth forming second
Q5IS89	biological_process	GO:0008045	motor neuron axon guidance
Q5IS89	biological_process	GO:0048703	embryonic viscerocranium morphogenesis
Q5IS89	biological_process	GO:0090190	positive regulation of branching involved in ureteric bud morphogenesis
Q5IS89	biological_process	GO:0060322	head development
Q5IS89	biological_process	GO:0001764	neuron migration
Q5IS89	biological_process	GO:2000768	positive regulation of nephron tubule epithelial cell differentiation
Q5IS89	biological_process	GO:0048646	anatomical structure formation involved in morphogenesis
Q5IS89	biological_process	GO:0072178	nephric duct morphogenesis
Q5IS89	biological_process	GO:0061205	paramesonephric duct development
Q5IS89	biological_process	GO:0009952	anterior/posterior pattern specification
Q5IS89	biological_process	GO:0060429	epithelium development
Q5IS89	biological_process	GO:0010468	regulation of gene expression
Q5IS89	biological_process	GO:0001822	kidney development
Q5IS89	biological_process	GO:0060068	vagina development
Q5IS89	biological_process	GO:0001706	endoderm formation
Q5IS89	biological_process	GO:2000744	positive regulation of anterior head development
Q5IS89	biological_process	GO:0045893	positive regulation of transcription, DNA-dependent
Q5IS89	biological_process	GO:0090009	primitive streak formation
Q5IS89	biological_process	GO:0009880	embryonic pattern specification
Q5IS89	biological_process	GO:0072077	renal vesicle morphogenesis
Q5IS89	biological_process	GO:0060066	oviduct development
Q5IS89	biological_process	GO:0035846	oviduct epithelium development
Q5IS89	biological_process	GO:2000543	positive regulation of gastrulation
Q5IS89	biological_process	GO:0021549	cerebellum development
Q5IS89	biological_process	GO:0001655	urogenital system development
Q5IS89	biological_process	GO:0007267	cell-cell signaling
Q5IS89	biological_process	GO:0060059	embryonic retina morphogenesis in camera-type eye
Q5IS89	biological_process	GO:0006366	transcription from RNA polymerase II promoter
Q5IS89	biological_process	GO:0021871	forebrain regionalization
Q5IS89	biological_process	GO:0021702	cerebellar Purkinje cell differentiation
Q5IS89	biological_process	GO:0009948	anterior/posterior axis specification
Q5IS89	biological_process	GO:0001657	ureteric bud development
Q5ISK2	molecular_function	GO:0003714	transcription corepressor activity
Q5ISK2	molecular_function	GO:0001071	nucleic acid binding transcription factor activity
Q5ISK2	cellular_component	GO:0005634	nucleus
Q5ISK2	cellular_component	GO:0043234	protein complex
Q5ISK2	biological_process	GO:0040019	positive regulation of embryonic development
Q5ISK2	biological_process	GO:0072050	S-shaped body morphogenesis
Q5ISK2	biological_process	GO:0060065	uterus development
Q5ISK2	biological_process	GO:0001705	ectoderm formation
Q5ISK2	biological_process	GO:0021937	cerebellar Purkinje cell-granule cell precursor cell signaling involved in regulation of granule cell precursor cell proliferation
Q5ISK2	biological_process	GO:0010842	retina layer formation
Q5ISK2	biological_process	GO:0021527	spinal cord association neuron differentiation
Q5ISK2	biological_process	GO:0060067	cervix development
Q5ISK2	biological_process	GO:0007389	pattern specification process
Q5ISK2	biological_process	GO:0072049	comma-shaped body morphogenesis
Q5ISK2	biological_process	GO:0009791	post-embryonic development
Q5ISK2	biological_process	GO:0035847	uterine epithelium development
Q5ISK2	biological_process	GO:0045892	negative regulation of transcription, DNA-dependent
Q5ISK2	biological_process	GO:0009653	anatomical structure morphogenesis
Q5ISK2	biological_process	GO:0009953	dorsal/ventral pattern formation
Q5ISK2	biological_process	GO:0001702	gastrulation with mouth forming second
Q5ISK2	biological_process	GO:0008045	motor neuron axon guidance
Q5ISK2	biological_process	GO:0048703	embryonic viscerocranium morphogenesis
Q5ISK2	biological_process	GO:0090190	positive regulation of branching involved in ureteric bud morphogenesis
Q5ISK2	biological_process	GO:0060322	head development
Q5ISK2	biological_process	GO:0001764	neuron migration
Q5ISK2	biological_process	GO:2000768	positive regulation of nephron tubule epithelial cell differentiation
Q5ISK2	biological_process	GO:0048646	anatomical structure formation involved in morphogenesis
Q5ISK2	biological_process	GO:0072178	nephric duct morphogenesis
Q5ISK2	biological_process	GO:0061205	paramesonephric duct development
Q5ISK2	biological_process	GO:0009952	anterior/posterior pattern specification
Q5ISK2	biological_process	GO:0060429	epithelium development
Q5ISK2	biological_process	GO:0010468	regulation of gene expression
Q5ISK2	biological_process	GO:0001822	kidney development
Q5ISK2	biological_process	GO:0060068	vagina development
Q5ISK2	biological_process	GO:0001706	endoderm formation
Q5ISK2	biological_process	GO:2000744	positive regulation of anterior head development
Q5ISK2	biological_process	GO:0045893	positive regulation of transcription, DNA-dependent
Q5ISK2	biological_process	GO:0090009	primitive streak formation
Q5ISK2	biological_process	GO:0009880	embryonic pattern specification
Q5ISK2	biological_process	GO:0072077	renal vesicle morphogenesis
Q5ISK2	biological_process	GO:0060066	oviduct development
Q5ISK2	biological_process	GO:0035846	oviduct epithelium development
Q5ISK2	biological_process	GO:2000543	positive regulation of gastrulation
Q5ISK2	biological_process	GO:0021549	cerebellum development
Q5ISK2	biological_process	GO:0001655	urogenital system development
Q5ISK2	biological_process	GO:0007267	cell-cell signaling
Q5ISK2	biological_process	GO:0060059	embryonic retina morphogenesis in camera-type eye
Q5ISK2	biological_process	GO:0006366	transcription from RNA polymerase II promoter
Q5ISK2	biological_process	GO:0021871	forebrain regionalization
Q5ISK2	biological_process	GO:0021702	cerebellar Purkinje cell differentiation
Q5ISK2	biological_process	GO:0009948	anterior/posterior axis specification
Q5ISK2	biological_process	GO:0001657	ureteric bud development
Q61L47	molecular_function	GO:0035257	nuclear hormone receptor binding
Q61L47	molecular_function	GO:0005515	protein binding
Q61L47	molecular_function	GO:0003713	transcription coactivator activity
Q61L47	biological_process	GO:0000003	reproduction
Q61L47	biological_process	GO:0010468	regulation of gene expression
Q61L47	biological_process	GO:0048477	oogenesis
Q61L47	biological_process	GO:0040014	regulation of multicellular organism growth
Q61L47	biological_process	GO:0035188	hatching
Q61L47	biological_process	GO:0045893	positive regulation of transcription, DNA-dependent
Q61L47	biological_process	GO:0009792	embryo development ending in birth or egg hatching
Q61L47	biological_process	GO:0030730	sequestering of triglyceride
Q61L47	biological_process	GO:0019217	regulation of fatty acid metabolic process
Q61L47	biological_process	GO:0006915	apoptotic process
Q61L47	biological_process	GO:0008340	determination of adult lifespan
Q61L47	biological_process	GO:0019915	lipid storage
Q61L47	biological_process	GO:0040010	positive regulation of growth rate
Q61L47	biological_process	GO:0006898	receptor-mediated endocytosis
Q61L47	biological_process	GO:0040011	locomotion
Q61L47	biological_process	GO:0040018	positive regulation of multicellular organism growth
Q61L47	biological_process	GO:0040007	growth
Q61L47	biological_process	GO:0002119	nematode larval development
Q61L47	biological_process	GO:0006629	lipid metabolic process
Q6PVU4	molecular_function	GO:0003714	transcription corepressor activity
Q6PVU4	molecular_function	GO:0001071	nucleic acid binding transcription factor activity
Q6PVU4	cellular_component	GO:0005634	nucleus
Q6PVU4	cellular_component	GO:0043234	protein complex
Q6PVU4	biological_process	GO:0040019	positive regulation of embryonic development
Q6PVU4	biological_process	GO:0072050	S-shaped body morphogenesis
Q6PVU4	biological_process	GO:0060065	uterus development
Q6PVU4	biological_process	GO:0001705	ectoderm formation
Q6PVU4	biological_process	GO:0021937	cerebellar Purkinje cell-granule cell precursor cell signaling involved in regulation of granule cell precursor cell proliferation
Q6PVU4	biological_process	GO:0010842	retina layer formation
Q6PVU4	biological_process	GO:0021527	spinal cord association neuron differentiation
Q6PVU4	biological_process	GO:0060067	cervix development
Q6PVU4	biological_process	GO:0007389	pattern specification process
Q6PVU4	biological_process	GO:0072049	comma-shaped body morphogenesis
Q6PVU4	biological_process	GO:0009791	post-embryonic development
Q6PVU4	biological_process	GO:0035847	uterine epithelium development
Q6PVU4	biological_process	GO:0045892	negative regulation of transcription, DNA-dependent
Q6PVU4	biological_process	GO:0009653	anatomical structure morphogenesis
Q6PVU4	biological_process	GO:0009953	dorsal/ventral pattern formation
Q6PVU4	biological_process	GO:0001702	gastrulation with mouth forming second
Q6PVU4	biological_process	GO:0008045	motor neuron axon guidance
Q6PVU4	biological_process	GO:0048703	embryonic viscerocranium morphogenesis
Q6PVU4	biological_process	GO:0090190	positive regulation of branching involved in ureteric bud morphogenesis
Q6PVU4	biological_process	GO:0060322	head development
Q6PVU4	biological_process	GO:0001764	neuron migration
Q6PVU4	biological_process	GO:2000768	positive regulation of nephron tubule epithelial cell differentiation
Q6PVU4	biological_process	GO:0048646	anatomical structure formation involved in morphogenesis
Q6PVU4	biological_process	GO:0072178	nephric duct morphogenesis
Q6PVU4	biological_process	GO:0061205	paramesonephric duct development
Q6PVU4	biological_process	GO:0009952	anterior/posterior pattern specification
Q6PVU4	biological_process	GO:0060429	epithelium development
Q6PVU4	biological_process	GO:0010468	regulation of gene expression
Q6PVU4	biological_process	GO:0001822	kidney development
Q6PVU4	biological_process	GO:0060068	vagina development
Q6PVU4	biological_process	GO:0001706	endoderm formation
Q6PVU4	biological_process	GO:2000744	positive regulation of anterior head development
Q6PVU4	biological_process	GO:0045893	positive regulation of transcription, DNA-dependent
Q6PVU4	biological_process	GO:0090009	primitive streak formation
Q6PVU4	biological_process	GO:0009880	embryonic pattern specification
Q6PVU4	biological_process	GO:0072077	renal vesicle morphogenesis
Q6PVU4	biological_process	GO:0060066	oviduct development
Q6PVU4	biological_process	GO:0035846	oviduct epithelium development
Q6PVU4	biological_process	GO:2000543	positive regulation of gastrulation
Q6PVU4	biological_process	GO:0021549	cerebellum development
Q6PVU4	biological_process	GO:0001655	urogenital system development
Q6PVU4	biological_process	GO:0007267	cell-cell signaling
Q6PVU4	biological_process	GO:0060059	embryonic retina morphogenesis in camera-type eye
Q6PVU4	biological_process	GO:0006366	transcription from RNA polymerase II promoter
Q6PVU4	biological_process	GO:0021871	forebrain regionalization
Q6PVU4	biological_process	GO:0021702	cerebellar Purkinje cell differentiation
Q6PVU4	biological_process	GO:0009948	anterior/posterior axis specification
Q6PVU4	biological_process	GO:0001657	ureteric bud development
Q8TG40	molecular_function	GO:0005524	ATP binding
Q8TG40	biological_process	GO:0010468	regulation of gene expression
Q8TG40	biological_process	GO:0036166	phenotypic switching

## Sheet: b) LipidMetabProc_data
GeneID	Namespace	GO_ID	GO_Name
Q08E55	molecular_function	GO:0004252	serine-type endopeptidase activity
Q08E55	cellular_component	GO:0005794	Golgi apparatus
Q08E55	biological_process	GO:0006508	proteolysis
Q08E55	biological_process	GO:0006629	lipid metabolic process
Q32KY0	molecular_function	GO:0015485	cholesterol binding
Q32KY0	cellular_component	GO:0030425	dendrite
Q32KY0	cellular_component	GO:0005783	endoplasmic reticulum
Q32KY0	cellular_component	GO:0005615	extracellular space
Q32KY0	cellular_component	GO:0043025	neuronal cell body
Q32KY0	cellular_component	GO:0048471	perinuclear region of cytoplasm
Q32KY0	cellular_component	GO:0022626	cytosolic ribosome
Q32KY0	biological_process	GO:2000405	negative regulation of T cell migration
Q32KY0	biological_process	GO:0042246	tissue regeneration
Q32KY0	biological_process	GO:0007420	brain development
Q32KY0	biological_process	GO:0000302	response to reactive oxygen species
Q32KY0	biological_process	GO:0010642	negative regulation of platelet-derived growth factor receptor signaling pathway
Q32KY0	biological_process	GO:0042308	negative regulation of protein import into nucleus
Q32KY0	biological_process	GO:0006006	glucose metabolic process
Q32KY0	biological_process	GO:0048662	negative regulation of smooth muscle cell proliferation
Q32KY0	biological_process	GO:0042493	response to drug
Q32KY0	biological_process	GO:0048678	response to axon injury
Q32KY0	biological_process	GO:0071638	negative regulation of monocyte chemotactic protein-1 production
Q32KY0	biological_process	GO:1900016	negative regulation of cytokine production involved in inflammatory response
Q32KY0	biological_process	GO:0051895	negative regulation of focal adhesion assembly
Q32KY0	biological_process	GO:0007568	aging
Q32KY0	biological_process	GO:2000098	negative regulation of smooth muscle cell-matrix adhesion
Q32KY0	biological_process	GO:0014012	peripheral nervous system axon regeneration
Q32KY0	biological_process	GO:0060588	negative regulation of lipoprotein lipid oxidation
Q32KY0	biological_process	GO:0006629	lipid metabolic process
Q3SZN3	molecular_function	GO:0004222	metalloendopeptidase activity
Q3SZN3	cellular_component	GO:0031966	mitochondrial membrane
Q3SZN3	biological_process	GO:0006006	glucose metabolic process
Q3SZN3	biological_process	GO:0002024	diet induced thermogenesis
Q3SZN3	biological_process	GO:0006950	response to stress
Q3SZN3	biological_process	GO:0010637	negative regulation of mitochondrial fusion
Q3SZN3	biological_process	GO:0006515	misfolded or incompletely synthesized protein catabolic process
Q3SZN3	biological_process	GO:0097009	energy homeostasis
Q3SZN3	biological_process	GO:0006629	lipid metabolic process
Q3SZP5	molecular_function	GO:0003997	acyl-CoA oxidase activity
Q3SZP5	cellular_component	GO:0005777	peroxisome
Q3SZP5	biological_process	GO:0019395	fatty acid oxidation
Q3SZP5	biological_process	GO:0006693	prostaglandin metabolic process
Q3SZP5	biological_process	GO:0006091	generation of precursor metabolites and energy
Q3SZP5	biological_process	GO:0006629	lipid metabolic process
Q58D68	molecular_function	GO:0008081	phosphoric diester hydrolase activity
Q58D68	molecular_function	GO:0047390	glycerophosphocholine cholinephosphodiesterase activity
Q58D68	cellular_component	GO:0005886	plasma membrane
Q58D68	biological_process	GO:0019695	choline metabolic process
Q58D68	biological_process	GO:0006629	lipid metabolic process
E2RNL8	molecular_function	GO:0015485	cholesterol binding
E2RNL8	cellular_component	GO:0030425	dendrite
E2RNL8	cellular_component	GO:0005783	endoplasmic reticulum
E2RNL8	cellular_component	GO:0005615	extracellular space
E2RNL8	cellular_component	GO:0043025	neuronal cell body
E2RNL8	cellular_component	GO:0048471	perinuclear region of cytoplasm
E2RNL8	cellular_component	GO:0022626	cytosolic ribosome
E2RNL8	biological_process	GO:2000405	negative regulation of T cell migration
E2RNL8	biological_process	GO:0042246	tissue regeneration
E2RNL8	biological_process	GO:0007420	brain development
E2RNL8	biological_process	GO:0000302	response to reactive oxygen species
E2RNL8	biological_process	GO:0010642	negative regulation of platelet-derived growth factor receptor signaling pathway
E2RNL8	biological_process	GO:0042308	negative regulation of protein import into nucleus
E2RNL8	biological_process	GO:0006006	glucose metabolic process
E2RNL8	biological_process	GO:0048662	negative regulation of smooth muscle cell proliferation
E2RNL8	biological_process	GO:0042493	response to drug
E2RNL8	biological_process	GO:0048678	response to axon injury
E2RNL8	biological_process	GO:0071638	negative regulation of monocyte chemotactic protein-1 production
E2RNL8	biological_process	GO:1900016	negative regulation of cytokine production involved in inflammatory response
E2RNL8	biological_process	GO:0051895	negative regulation of focal adhesion assembly
E2RNL8	biological_process	GO:0007568	aging
E2RNL8	biological_process	GO:0014012	peripheral nervous system axon regeneration
E2RNL8	biological_process	GO:2000098	negative regulation of smooth muscle cell-matrix adhesion
E2RNL8	biological_process	GO:0060588	negative regulation of lipoprotein lipid oxidation
E2RNL8	biological_process	GO:0006629	lipid metabolic process
O00154	molecular_function	GO:0003824	catalytic activity
O00154	molecular_function	GO:0000062	fatty-acyl-CoA binding
O00154	cellular_component	GO:0005737	cytoplasm
O00154	biological_process	GO:0006629	lipid metabolic process
O00562	molecular_function	GO:0008526	phosphatidylinositol transporter activity
O00562	cellular_component	GO:0016020	membrane
O00562	biological_process	GO:0007602	phototransduction
O00562	biological_process	GO:0007420	brain development
O00562	biological_process	GO:0006629	lipid metabolic process
O14494	molecular_function	GO:0008195	phosphatidate phosphatase activity
O14494	cellular_component	GO:0016020	membrane
O14494	cellular_component	GO:0005887	integral to plasma membrane
O14494	cellular_component	GO:0005886	plasma membrane
O14494	biological_process	GO:0007205	protein kinase C-activating G-protein coupled receptor signaling pathway
O14494	biological_process	GO:0030148	sphingolipid biosynthetic process
O14494	biological_process	GO:0030521	androgen receptor signaling pathway
O14494	biological_process	GO:0008354	germ cell migration
O14494	biological_process	GO:0044281	small molecule metabolic process
O14494	biological_process	GO:0046839	phospholipid dephosphorylation
O14494	biological_process	GO:0006665	sphingolipid metabolic process
O14494	biological_process	GO:0006644	phospholipid metabolic process
O14494	biological_process	GO:0019216	regulation of lipid metabolic process
O14494	biological_process	GO:0030518	intracellular steroid hormone receptor signaling pathway
O14494	biological_process	GO:0006629	lipid metabolic process
O14494	biological_process	GO:0008285	negative regulation of cell proliferation
O14495	molecular_function	GO:0005515	protein binding
O14495	molecular_function	GO:0004721	phosphoprotein phosphatase activity
O14495	cellular_component	GO:0016020	membrane
O14495	cellular_component	GO:0005912	adherens junction
O14495	cellular_component	GO:0005886	plasma membrane
O14495	biological_process	GO:0044328	canonical Wnt receptor signaling pathway involved in positive regulation of endothelial cell migration
O14495	biological_process	GO:0030148	sphingolipid biosynthetic process
O14495	biological_process	GO:0008354	germ cell migration
O14495	biological_process	GO:0044281	small molecule metabolic process
O14495	biological_process	GO:0051091	positive regulation of sequence-specific DNA binding transcription factor activity
O14495	biological_process	GO:0001933	negative regulation of protein phosphorylation
O14495	biological_process	GO:0006665	sphingolipid metabolic process
O14495	biological_process	GO:0044330	canonical Wnt receptor signaling pathway involved in positive regulation of wound healing
O14495	biological_process	GO:0006644	phospholipid metabolic process
O14495	biological_process	GO:0044329	canonical Wnt receptor signaling pathway involved in positive regulation of cell-cell adhesion
O14495	biological_process	GO:0034109	homotypic cell-cell adhesion
O14495	biological_process	GO:0050821	protein stabilization
O14495	biological_process	GO:0006629	lipid metabolic process
O14773	molecular_function	GO:0004175	endopeptidase activity
O14773	molecular_function	GO:0008233	peptidase activity
O14773	molecular_function	GO:0005515	protein binding
O14773	molecular_function	GO:0042277	peptide binding
O14773	molecular_function	GO:0008240	tripeptidyl-peptidase activity
O14773	molecular_function	GO:0008236	serine-type peptidase activity
O14773	cellular_component	GO:0043202	lysosomal lumen
O14773	cellular_component	GO:0005764	lysosome
O14773	biological_process	GO:0045453	bone resorption
O14773	biological_process	GO:0007399	nervous system development
O14773	biological_process	GO:0043171	peptide catabolic process
O14773	biological_process	GO:0030163	protein catabolic process
O14773	biological_process	GO:0006508	proteolysis
O14773	biological_process	GO:0006987	activation of signaling protein activity involved in unfolded protein response
O14773	biological_process	GO:0050885	neuromuscular process controlling balance
O14773	biological_process	GO:0030968	endoplasmic reticulum unfolded protein response
O14773	biological_process	GO:0006629	lipid metabolic process
O14773	biological_process	GO:0007040	lysosome organization
O14880	molecular_function	GO:0004364	glutathione transferase activity
O14880	molecular_function	GO:0004601	peroxidase activity
O14880	molecular_function	GO:0004602	glutathione peroxidase activity
O14880	cellular_component	GO:0043231	intracellular membrane-bounded organelle
O14880	cellular_component	GO:0016020	membrane
O14880	cellular_component	GO:0005783	endoplasmic reticulum
O14880	cellular_component	GO:0005789	endoplasmic reticulum membrane
O14880	biological_process	GO:0007165	signal transduction
O14880	biological_process	GO:0006805	xenobiotic metabolic process
O14880	biological_process	GO:0006750	glutathione biosynthetic process
O14880	biological_process	GO:0044281	small molecule metabolic process
O14880	biological_process	GO:0006629	lipid metabolic process
O15296	molecular_function	GO:0050473	arachidonate 15-lipoxygenase activity
O15296	cellular_component	GO:0005622	intracellular
O15296	biological_process	GO:0045926	negative regulation of growth
O15296	biological_process	GO:0045786	negative regulation of cell cycle
O15296	biological_process	GO:0030856	regulation of epithelial cell differentiation
O15296	biological_process	GO:0030336	negative regulation of cell migration
O15296	biological_process	GO:0030850	prostate gland development
O15296	biological_process	GO:0006631	fatty acid metabolic process
O15296	biological_process	GO:0006917	induction of apoptosis
O15296	biological_process	GO:0006629	lipid metabolic process
O15296	biological_process	GO:0008285	negative regulation of cell proliferation
O60240	molecular_function	GO:0008289	lipid binding
O60240	cellular_component	GO:0005811	lipid particle
O60240	biological_process	GO:0019433	triglyceride catabolic process
O60240	biological_process	GO:0044281	small molecule metabolic process
O60240	biological_process	GO:0006629	lipid metabolic process
O60488	molecular_function	GO:0004467	long-chain fatty acid-CoA ligase activity
O60488	molecular_function	GO:0047676	arachidonate-CoA ligase activity
O60488	molecular_function	GO:0031957	very long-chain fatty acid-CoA ligase activity
O60488	cellular_component	GO:0005811	lipid particle
O60488	cellular_component	GO:0005789	endoplasmic reticulum membrane
O60488	cellular_component	GO:0005737	cytoplasm
O60488	biological_process	GO:0030307	positive regulation of cell growth
O60488	biological_process	GO:0001676	long-chain fatty acid metabolic process
O60488	biological_process	GO:0044281	small molecule metabolic process
O60488	biological_process	GO:0032307	negative regulation of prostaglandin secretion
O60488	biological_process	GO:0044255	cellular lipid metabolic process
O60488	biological_process	GO:0035338	long-chain fatty-acyl-CoA biosynthetic process
O60488	biological_process	GO:0019432	triglyceride biosynthetic process
O60488	biological_process	GO:0006629	lipid metabolic process
O60488	biological_process	GO:0008610	lipid biosynthetic process
O60494	molecular_function	GO:0042803	protein homodimerization activity
O60494	molecular_function	GO:0005215	transporter activity
O60494	cellular_component	GO:0016020	membrane
O60494	cellular_component	GO:0031526	brush border membrane
O60494	cellular_component	GO:0005829	cytosol
O60494	cellular_component	GO:0043202	lysosomal lumen
O60494	cellular_component	GO:0031232	extrinsic to external side of plasma membrane
O60494	cellular_component	GO:0005886	plasma membrane
O60494	biological_process	GO:0044281	small molecule metabolic process
O60494	biological_process	GO:0001894	tissue homeostasis
O60494	biological_process	GO:0008202	steroid metabolic process
O60494	biological_process	GO:0015889	cobalamin transport
O60494	biological_process	GO:0006898	receptor-mediated endocytosis
O60494	biological_process	GO:0042157	lipoprotein metabolic process
O60494	biological_process	GO:0042359	vitamin D metabolic process
O60494	biological_process	GO:0006629	lipid metabolic process
O60543	molecular_function	GO:0042803	protein homodimerization activity
O60543	cellular_component	GO:0005740	mitochondrial envelope
O60543	cellular_component	GO:0005634	nucleus
O60543	cellular_component	GO:0005811	lipid particle
O60543	cellular_component	GO:0005739	mitochondrion
O60543	cellular_component	GO:0005737	cytoplasm
O60543	biological_process	GO:0008630	intrinsic apoptotic signaling pathway in response to DNA damage response
O60543	biological_process	GO:0001659	temperature homeostasis
O60543	biological_process	GO:0010890	positive regulation of sequestering of triglyceride
O60543	biological_process	GO:0043066	negative regulation of apoptotic process
O60543	biological_process	GO:0032720	negative regulation of tumor necrosis factor production
O60543	biological_process	GO:0008219	cell death
O60543	biological_process	GO:0006915	apoptotic process
O60543	biological_process	GO:0050995	negative regulation of lipid catabolic process
O60543	biological_process	GO:0019915	lipid storage
O60543	biological_process	GO:0030512	negative regulation of transforming growth factor beta receptor signaling pathway
O60543	biological_process	GO:0050710	negative regulation of cytokine secretion
O60543	biological_process	GO:0006309	apoptotic DNA fragmentation
O60543	biological_process	GO:0006629	lipid metabolic process
O75131	molecular_function	GO:0005544	calcium-dependent phospholipid binding
O75131	molecular_function	GO:0004674	protein serine/threonine kinase activity
O75131	molecular_function	GO:0005215	transporter activity
O75131	cellular_component	GO:0005829	cytosol
O75131	cellular_component	GO:0005737	cytoplasm
O75131	biological_process	GO:0016192	vesicle-mediated transport
O75131	biological_process	GO:0006629	lipid metabolic process
O75452	molecular_function	GO:0009055	electron carrier activity
O75452	molecular_function	GO:0004745	retinol dehydrogenase activity
O75452	cellular_component	GO:0043231	intracellular membrane-bounded organelle
O75452	biological_process	GO:0006629	lipid metabolic process
O95477	molecular_function	GO:0031267	small GTPase binding
O95477	molecular_function	GO:0005524	ATP binding
O95477	molecular_function	GO:0015485	cholesterol binding
O95477	molecular_function	GO:0034185	apolipoprotein binding
O95477	molecular_function	GO:0034188	apolipoprotein A-I receptor activity
O95477	molecular_function	GO:0017127	cholesterol transporter activity
O95477	molecular_function	GO:0005543	phospholipid binding
O95477	molecular_function	GO:0005515	protein binding
O95477	molecular_function	GO:0034186	apolipoprotein A-I binding
O95477	molecular_function	GO:0019905	syntaxin binding
O95477	molecular_function	GO:0005548	phospholipid transporter activity
O95477	molecular_function	GO:0008509	anion transmembrane transporter activity
O95477	cellular_component	GO:0045335	phagocytic vesicle
O95477	cellular_component	GO:0045121	membrane raft
O95477	cellular_component	GO:0030139	endocytic vesicle
O95477	cellular_component	GO:0005887	integral to plasma membrane
O95477	cellular_component	GO:0005886	plasma membrane
O95477	biological_process	GO:0050702	interleukin-1 beta secretion
O95477	biological_process	GO:0008203	cholesterol metabolic process
O95477	biological_process	GO:0033344	cholesterol efflux
O95477	biological_process	GO:0044281	small molecule metabolic process
O95477	biological_process	GO:0044255	cellular lipid metabolic process
O95477	biological_process	GO:0042632	cholesterol homeostasis
O95477	biological_process	GO:0034616	response to laminar fluid shear stress
O95477	biological_process	GO:0042157	lipoprotein metabolic process
O95477	biological_process	GO:0030819	positive regulation of cAMP biosynthetic process
O95477	biological_process	GO:0007040	lysosome organization
O95477	biological_process	GO:0055091	phospholipid homeostasis
O95477	biological_process	GO:0007186	G-protein coupled receptor signaling pathway
O95477	biological_process	GO:0016197	endosomal transport
O95477	biological_process	GO:0055098	response to low-density lipoprotein particle stimulus
O95477	biological_process	GO:0060155	platelet dense granule organization
O95477	biological_process	GO:0010887	negative regulation of cholesterol storage
O95477	biological_process	GO:0034380	high-density lipoprotein particle assembly
O95477	biological_process	GO:0010745	negative regulation of macrophage derived foam cell differentiation
O95477	biological_process	GO:0032367	intracellular cholesterol transport
O95477	biological_process	GO:0038027	apolipoprotein A-I-mediated signaling pathway
O95477	biological_process	GO:0033700	phospholipid efflux
O95477	biological_process	GO:0043691	reverse cholesterol transport
O95477	biological_process	GO:0032489	regulation of Cdc42 protein signal transduction
O95477	biological_process	GO:0006629	lipid metabolic process
O95741	molecular_function	GO:0005509	calcium ion binding
O95741	molecular_function	GO:0005215	transporter activity
O95741	biological_process	GO:0007399	nervous system development
O95741	biological_process	GO:0007268	synaptic transmission
O95741	biological_process	GO:0016192	vesicle-mediated transport
O95741	biological_process	GO:0006629	lipid metabolic process
O95992	molecular_function	GO:0008395	steroid hydroxylase activity
O95992	cellular_component	GO:0005829	cytosol
O95992	biological_process	GO:0008206	bile acid metabolic process
O95992	biological_process	GO:0044281	small molecule metabolic process
O95992	biological_process	GO:0006699	bile acid biosynthetic process
O95992	biological_process	GO:0006629	lipid metabolic process
P01130	molecular_function	GO:0005041	low-density lipoprotein receptor activity
P01130	molecular_function	GO:0030229	very-low-density lipoprotein particle receptor activity
P01130	molecular_function	GO:0005515	protein binding
P01130	molecular_function	GO:0001948	glycoprotein binding
P01130	cellular_component	GO:0010008	endosome membrane
P01130	cellular_component	GO:0009897	external side of plasma membrane
P01130	cellular_component	GO:0005770	late endosome
P01130	cellular_component	GO:0005764	lysosome
P01130	cellular_component	GO:0030669	clathrin-coated endocytic vesicle membrane
P01130	cellular_component	GO:0009986	cell surface
P01130	cellular_component	GO:0005887	integral to plasma membrane
P01130	cellular_component	GO:0005794	Golgi apparatus
P01130	cellular_component	GO:0005905	coated pit
P01130	cellular_component	GO:0005769	early endosome
P01130	cellular_component	GO:0005886	plasma membrane
P01130	biological_process	GO:0034383	low-density lipoprotein particle clearance
P01130	biological_process	GO:0010867	positive regulation of triglyceride biosynthetic process
P01130	biological_process	GO:0010899	regulation of phosphatidylcholine catabolic process
P01130	biological_process	GO:0030301	cholesterol transport
P01130	biological_process	GO:0044281	small molecule metabolic process
P01130	biological_process	GO:0006898	receptor-mediated endocytosis
P01130	biological_process	GO:0015914	phospholipid transport
P01130	biological_process	GO:0030299	intestinal cholesterol absorption
P01130	biological_process	GO:0070508	cholesterol import
P01130	biological_process	GO:0042632	cholesterol homeostasis
P01130	biological_process	GO:0006897	endocytosis
P01130	biological_process	GO:0042157	lipoprotein metabolic process
P01130	biological_process	GO:0006629	lipid metabolic process
P02647	molecular_function	GO:0001540	beta-amyloid binding
P02647	molecular_function	GO:0070653	high-density lipoprotein particle receptor binding
P02647	molecular_function	GO:0042802	identical protein binding
P02647	molecular_function	GO:0015485	cholesterol binding
P02647	molecular_function	GO:0034190	apolipoprotein receptor binding
P02647	molecular_function	GO:0017127	cholesterol transporter activity
P02647	molecular_function	GO:0005543	phospholipid binding
P02647	molecular_function	GO:0034191	apolipoprotein A-I receptor binding
P02647	molecular_function	GO:0060228	phosphatidylcholine-sterol O-acyltransferase activator activity
P02647	molecular_function	GO:0005515	protein binding
P02647	molecular_function	GO:0019899	enzyme binding
P02647	cellular_component	GO:0005788	endoplasmic reticulum lumen
P02647	cellular_component	GO:0005615	extracellular space
P02647	cellular_component	GO:0031410	cytoplasmic vesicle
P02647	cellular_component	GO:0034366	spherical high-density lipoprotein particle
P02647	cellular_component	GO:0030141	secretory granule
P02647	cellular_component	GO:0034364	high-density lipoprotein particle
P02647	cellular_component	GO:0030139	endocytic vesicle
P02647	cellular_component	GO:0005576	extracellular region
P02647	cellular_component	GO:0034361	very-low-density lipoprotein particle
P02647	cellular_component	GO:0005886	plasma membrane
P02647	biological_process	GO:0010804	negative regulation of tumor necrosis factor-mediated signaling pathway
P02647	biological_process	GO:0007596	blood coagulation
P02647	biological_process	GO:0050713	negative regulation of interleukin-1 beta secretion
P02647	biological_process	GO:0050728	negative regulation of inflammatory response
P02647	biological_process	GO:0033344	cholesterol efflux
P02647	biological_process	GO:0030301	cholesterol transport
P02647	biological_process	GO:0002576	platelet degranulation
P02647	biological_process	GO:0070328	triglyceride homeostasis
P02647	biological_process	GO:0044255	cellular lipid metabolic process
P02647	biological_process	GO:0042157	lipoprotein metabolic process
P02647	biological_process	GO:0055091	phospholipid homeostasis
P02647	biological_process	GO:0051345	positive regulation of hydrolase activity
P02647	biological_process	GO:0034115	negative regulation of heterotypic cell-cell adhesion
P02647	biological_process	GO:0033700	phospholipid efflux
P02647	biological_process	GO:0018158	protein oxidation
P02647	biological_process	GO:0043691	reverse cholesterol transport
P02647	biological_process	GO:0032489	regulation of Cdc42 protein signal transduction
P02647	biological_process	GO:0006656	phosphatidylcholine biosynthetic process
P02647	biological_process	GO:0006629	lipid metabolic process
P02647	biological_process	GO:0008203	cholesterol metabolic process
P02647	biological_process	GO:0010903	negative regulation of very-low-density lipoprotein particle remodeling
P02647	biological_process	GO:0030168	platelet activation
P02647	biological_process	GO:0044281	small molecule metabolic process
P02647	biological_process	GO:0070508	cholesterol import
P02647	biological_process	GO:0002740	negative regulation of cytokine secretion involved in immune response
P02647	biological_process	GO:0042632	cholesterol homeostasis
P02647	biological_process	GO:0007186	G-protein coupled receptor signaling pathway
P02647	biological_process	GO:0060761	negative regulation of response to cytokine stimulus
P02647	biological_process	GO:0055085	transmembrane transport
P02647	biological_process	GO:0060354	negative regulation of cell adhesion molecule production
P02647	biological_process	GO:0034384	high-density lipoprotein particle clearance
P02647	biological_process	GO:0034380	high-density lipoprotein particle assembly
P02647	biological_process	GO:0034375	high-density lipoprotein particle remodeling
P02647	biological_process	GO:0050821	protein stabilization
P02647	biological_process	GO:0018206	peptidyl-methionine modification
P02647	biological_process	GO:0010873	positive regulation of cholesterol esterification
P02649	molecular_function	GO:0001540	beta-amyloid binding
P02649	molecular_function	GO:0042802	identical protein binding
P02649	molecular_function	GO:0046982	protein heterodimerization activity
P02649	molecular_function	GO:0070326	very-low-density lipoprotein particle receptor binding
P02649	molecular_function	GO:0042803	protein homodimerization activity
P02649	molecular_function	GO:0048156	tau protein binding
P02649	molecular_function	GO:0005543	phospholipid binding
P02649	molecular_function	GO:0005319	lipid transporter activity
P02649	molecular_function	GO:0008289	lipid binding
P02649	molecular_function	GO:0016209	antioxidant activity
P02649	molecular_function	GO:0060228	phosphatidylcholine-sterol O-acyltransferase activator activity
P02649	molecular_function	GO:0005515	protein binding
P02649	molecular_function	GO:0046911	metal chelating activity
P02649	molecular_function	GO:0008201	heparin binding
P02649	molecular_function	GO:0050750	low-density lipoprotein particle receptor binding
P02649	cellular_component	GO:0030425	dendrite
P02649	cellular_component	GO:0005615	extracellular space
P02649	cellular_component	GO:0034362	low-density lipoprotein particle
P02649	cellular_component	GO:0005737	cytoplasm
P02649	cellular_component	GO:0043025	neuronal cell body
P02649	cellular_component	GO:0034363	intermediate-density lipoprotein particle
P02649	cellular_component	GO:0042627	chylomicron
P02649	cellular_component	GO:0034364	high-density lipoprotein particle
P02649	cellular_component	GO:0005576	extracellular region
P02649	cellular_component	GO:0034361	very-low-density lipoprotein particle
P02649	cellular_component	GO:0005886	plasma membrane
P02649	biological_process	GO:0046907	intracellular transport
P02649	biological_process	GO:0043407	negative regulation of MAP kinase activity
P02649	biological_process	GO:0007263	nitric oxide mediated signal transduction
P02649	biological_process	GO:0050728	negative regulation of inflammatory response
P02649	biological_process	GO:0033344	cholesterol efflux
P02649	biological_process	GO:0034372	very-low-density lipoprotein particle remodeling
P02649	biological_process	GO:0006917	induction of apoptosis
P02649	biological_process	GO:0034382	chylomicron remnant clearance
P02649	biological_process	GO:0042157	lipoprotein metabolic process
P02649	biological_process	GO:0001937	negative regulation of endothelial cell proliferation
P02649	biological_process	GO:0051044	positive regulation of membrane protein ectodomain proteolysis
P02649	biological_process	GO:0043066	negative regulation of apoptotic process
P02649	biological_process	GO:0007271	synaptic transmission, cholinergic
P02649	biological_process	GO:0033700	phospholipid efflux
P02649	biological_process	GO:0006898	receptor-mediated endocytosis
P02649	biological_process	GO:0007010	cytoskeleton organization
P02649	biological_process	GO:0043691	reverse cholesterol transport
P02649	biological_process	GO:0032489	regulation of Cdc42 protein signal transduction
P02649	biological_process	GO:0006629	lipid metabolic process
P02649	biological_process	GO:0010875	positive regulation of cholesterol efflux
P02649	biological_process	GO:0051000	positive regulation of nitric-oxide synthase activity
P02649	biological_process	GO:0008203	cholesterol metabolic process
P02649	biological_process	GO:0000302	response to reactive oxygen species
P02649	biological_process	GO:0044281	small molecule metabolic process
P02649	biological_process	GO:0010544	negative regulation of platelet activation
P02649	biological_process	GO:0019934	cGMP-mediated signaling
P02649	biological_process	GO:0048168	regulation of neuronal synaptic plasticity
P02649	biological_process	GO:0042632	cholesterol homeostasis
P02649	biological_process	GO:0030828	positive regulation of cGMP biosynthetic process
P02649	biological_process	GO:0007186	G-protein coupled receptor signaling pathway
P02649	biological_process	GO:0030195	negative regulation of blood coagulation
P02649	biological_process	GO:0006641	triglyceride metabolic process
P02649	biological_process	GO:0030516	regulation of axon extension
P02649	biological_process	GO:0034384	high-density lipoprotein particle clearance
P02649	biological_process	GO:0032805	positive regulation of low-density lipoprotein particle receptor catabolic process
P02649	biological_process	GO:0034380	high-density lipoprotein particle assembly
P02649	biological_process	GO:0045541	negative regulation of cholesterol biosynthetic process
P02649	biological_process	GO:0034375	high-density lipoprotein particle remodeling
P02649	biological_process	GO:0034447	very-low-density lipoprotein particle clearance
P02649	biological_process	GO:0043537	negative regulation of blood vessel endothelial cell migration
P02649	biological_process	GO:0010873	positive regulation of cholesterol esterification
P02652	molecular_function	GO:0031210	phosphatidylcholine binding
P02652	molecular_function	GO:0070653	high-density lipoprotein particle receptor binding
P02652	molecular_function	GO:0055102	lipase inhibitor activity
P02652	molecular_function	GO:0015485	cholesterol binding
P02652	molecular_function	GO:0046982	protein heterodimerization activity
P02652	molecular_function	GO:0034190	apolipoprotein receptor binding
P02652	molecular_function	GO:0017127	cholesterol transporter activity
P02652	molecular_function	GO:0042803	protein homodimerization activity
P02652	molecular_function	GO:0005543	phospholipid binding
P02652	molecular_function	GO:0005319	lipid transporter activity
P02652	molecular_function	GO:0008289	lipid binding
P02652	molecular_function	GO:0060228	phosphatidylcholine-sterol O-acyltransferase activator activity
P02652	molecular_function	GO:0005515	protein binding
P02652	cellular_component	GO:0005788	endoplasmic reticulum lumen
P02652	cellular_component	GO:0042627	chylomicron
P02652	cellular_component	GO:0034364	high-density lipoprotein particle
P02652	cellular_component	GO:0034361	very-low-density lipoprotein particle
P02652	cellular_component	GO:0005576	extracellular region
P02652	cellular_component	GO:0034366	spherical high-density lipoprotein particle
P02652	biological_process	GO:0060192	negative regulation of lipase activity
P02652	biological_process	GO:0010903	negative regulation of very-low-density lipoprotein particle remodeling
P02652	biological_process	GO:0034374	low-density lipoprotein particle remodeling
P02652	biological_process	GO:0060621	negative regulation of cholesterol import
P02652	biological_process	GO:0033344	cholesterol efflux
P02652	biological_process	GO:0044281	small molecule metabolic process
P02652	biological_process	GO:0060695	negative regulation of cholesterol transporter activity
P02652	biological_process	GO:0050995	negative regulation of lipid catabolic process
P02652	biological_process	GO:0044255	cellular lipid metabolic process
P02652	biological_process	GO:0042632	cholesterol homeostasis
P02652	biological_process	GO:0002740	negative regulation of cytokine secretion involved in immune response
P02652	biological_process	GO:0009749	response to glucose stimulus
P02652	biological_process	GO:0042157	lipoprotein metabolic process
P02652	biological_process	GO:0006457	protein folding
P02652	biological_process	GO:0009395	phospholipid catabolic process
P02652	biological_process	GO:0034370	triglyceride-rich lipoprotein particle remodeling
P02652	biological_process	GO:0032375	negative regulation of cholesterol transport
P02652	biological_process	GO:0006641	triglyceride metabolic process
P02652	biological_process	GO:0046340	diacylglycerol catabolic process
P02652	biological_process	GO:0034384	high-density lipoprotein particle clearance
P02652	biological_process	GO:0050996	positive regulation of lipid catabolic process
P02652	biological_process	GO:0034380	high-density lipoprotein particle assembly
P02652	biological_process	GO:0034375	high-density lipoprotein particle remodeling
P02652	biological_process	GO:0033700	phospholipid efflux
P02652	biological_process	GO:0031647	regulation of protein stability
P02652	biological_process	GO:0018158	protein oxidation
P02652	biological_process	GO:0043691	reverse cholesterol transport
P02652	biological_process	GO:0045416	positive regulation of interleukin-8 biosynthetic process
P02652	biological_process	GO:0006656	phosphatidylcholine biosynthetic process
P02652	biological_process	GO:0010873	positive regulation of cholesterol esterification
P02652	biological_process	GO:0006629	lipid metabolic process
P02652	biological_process	GO:0018206	peptidyl-methionine modification
P02654	molecular_function	GO:0004859	phospholipase inhibitor activity
P02654	molecular_function	GO:0060228	phosphatidylcholine-sterol O-acyltransferase activator activity
P02654	molecular_function	GO:0031210	phosphatidylcholine binding
P02654	molecular_function	GO:0055102	lipase inhibitor activity
P02654	molecular_function	GO:0005504	fatty acid binding
P02654	cellular_component	GO:0005783	endoplasmic reticulum
P02654	cellular_component	GO:0042627	chylomicron
P02654	cellular_component	GO:0034364	high-density lipoprotein particle
P02654	cellular_component	GO:0034361	very-low-density lipoprotein particle
P02654	biological_process	GO:0051005	negative regulation of lipoprotein lipase activity
P02654	biological_process	GO:0045833	negative regulation of lipid metabolic process
P02654	biological_process	GO:0010916	negative regulation of very-low-density lipoprotein particle clearance
P02654	biological_process	GO:0033344	cholesterol efflux
P02654	biological_process	GO:0050995	negative regulation of lipid catabolic process
P02654	biological_process	GO:0034379	very-low-density lipoprotein particle assembly
P02654	biological_process	GO:0034382	chylomicron remnant clearance
P02654	biological_process	GO:0032374	regulation of cholesterol transport
P02654	biological_process	GO:0010900	negative regulation of phosphatidylcholine catabolic process
P02654	biological_process	GO:0032375	negative regulation of cholesterol transport
P02654	biological_process	GO:0048261	negative regulation of receptor-mediated endocytosis
P02654	biological_process	GO:0034369	plasma lipoprotein particle remodeling
P02654	biological_process	GO:0033700	phospholipid efflux
P02654	biological_process	GO:0034375	high-density lipoprotein particle remodeling
P02654	biological_process	GO:0045717	negative regulation of fatty acid biosynthetic process
P02654	biological_process	GO:0034447	very-low-density lipoprotein particle clearance
P02654	biological_process	GO:0010873	positive regulation of cholesterol esterification
P02654	biological_process	GO:0006629	lipid metabolic process
P02655	molecular_function	GO:0008289	lipid binding
P02655	molecular_function	GO:0055102	lipase inhibitor activity
P02655	molecular_function	GO:0060230	lipoprotein lipase activator activity
P02655	molecular_function	GO:0043274	phospholipase binding
P02655	molecular_function	GO:0016004	phospholipase activator activity
P02655	molecular_function	GO:0042803	protein homodimerization activity
P02655	cellular_component	GO:0034363	intermediate-density lipoprotein particle
P02655	cellular_component	GO:0005615	extracellular space
P02655	cellular_component	GO:0042627	chylomicron
P02655	cellular_component	GO:0034362	low-density lipoprotein particle
P02655	cellular_component	GO:0034361	very-low-density lipoprotein particle
P02655	cellular_component	GO:0005576	extracellular region
P02655	cellular_component	GO:0034366	spherical high-density lipoprotein particle
P02655	biological_process	GO:0045833	negative regulation of lipid metabolic process
P02655	biological_process	GO:0010916	negative regulation of very-low-density lipoprotein particle clearance
P02655	biological_process	GO:0010898	positive regulation of triglyceride catabolic process
P02655	biological_process	GO:0033344	cholesterol efflux
P02655	biological_process	GO:0044281	small molecule metabolic process
P02655	biological_process	GO:0034372	very-low-density lipoprotein particle remodeling
P02655	biological_process	GO:0010902	positive regulation of very-low-density lipoprotein particle remodeling
P02655	biological_process	GO:0070328	triglyceride homeostasis
P02655	biological_process	GO:0042632	cholesterol homeostasis
P02655	biological_process	GO:0034382	chylomicron remnant clearance
P02655	biological_process	GO:0042157	lipoprotein metabolic process
P02655	biological_process	GO:0060697	positive regulation of phospholipid catabolic process
P02655	biological_process	GO:0034370	triglyceride-rich lipoprotein particle remodeling
P02655	biological_process	GO:0032375	negative regulation of cholesterol transport
P02655	biological_process	GO:0048261	negative regulation of receptor-mediated endocytosis
P02655	biological_process	GO:0034384	high-density lipoprotein particle clearance
P02655	biological_process	GO:0045723	positive regulation of fatty acid biosynthetic process
P02655	biological_process	GO:0010518	positive regulation of phospholipase activity
P02655	biological_process	GO:0033700	phospholipid efflux
P02655	biological_process	GO:0051006	positive regulation of lipoprotein lipase activity
P02655	biological_process	GO:0043691	reverse cholesterol transport
P02655	biological_process	GO:0034371	chylomicron remodeling
P02655	biological_process	GO:0006629	lipid metabolic process
P02656	molecular_function	GO:0070653	high-density lipoprotein particle receptor binding
P02656	molecular_function	GO:0055102	lipase inhibitor activity
P02656	molecular_function	GO:0015485	cholesterol binding
P02656	molecular_function	GO:0030234	enzyme regulator activity
P02656	molecular_function	GO:0005543	phospholipid binding
P02656	cellular_component	GO:0034363	intermediate-density lipoprotein particle
P02656	cellular_component	GO:0005615	extracellular space
P02656	cellular_component	GO:0042627	chylomicron
P02656	cellular_component	GO:0034361	very-low-density lipoprotein particle
P02656	cellular_component	GO:0005576	extracellular region
P02656	cellular_component	GO:0034366	spherical high-density lipoprotein particle
P02656	biological_process	GO:0019433	triglyceride catabolic process
P02656	biological_process	GO:0051005	negative regulation of lipoprotein lipase activity
P02656	biological_process	GO:0045833	negative regulation of lipid metabolic process
P02656	biological_process	GO:0010916	negative regulation of very-low-density lipoprotein particle clearance
P02656	biological_process	GO:0010903	negative regulation of very-low-density lipoprotein particle remodeling
P02656	biological_process	GO:0060621	negative regulation of cholesterol import
P02656	biological_process	GO:0010897	negative regulation of triglyceride catabolic process
P02656	biological_process	GO:0033344	cholesterol efflux
P02656	biological_process	GO:0044281	small molecule metabolic process
P02656	biological_process	GO:0050995	negative regulation of lipid catabolic process
P02656	biological_process	GO:0034379	very-low-density lipoprotein particle assembly
P02656	biological_process	GO:0070328	triglyceride homeostasis
P02656	biological_process	GO:0042632	cholesterol homeostasis
P02656	biological_process	GO:0034382	chylomicron remnant clearance
P02656	biological_process	GO:0042157	lipoprotein metabolic process
P02656	biological_process	GO:0007186	G-protein coupled receptor signaling pathway
P02656	biological_process	GO:0010989	negative regulation of low-density lipoprotein particle clearance
P02656	biological_process	GO:0048261	negative regulation of receptor-mediated endocytosis
P02656	biological_process	GO:0006641	triglyceride metabolic process
P02656	biological_process	GO:0010987	negative regulation of high-density lipoprotein particle clearance
P02656	biological_process	GO:0045717	negative regulation of fatty acid biosynthetic process
P02656	biological_process	GO:0033700	phospholipid efflux
P02656	biological_process	GO:0034375	high-density lipoprotein particle remodeling
P02656	biological_process	GO:0043691	reverse cholesterol transport
P02656	biological_process	GO:0032489	regulation of Cdc42 protein signal transduction
P02656	biological_process	GO:0006629	lipid metabolic process
P02768	molecular_function	GO:0003677	DNA binding
P02768	molecular_function	GO:0015643	toxin binding
P02768	molecular_function	GO:0051087	chaperone binding
P02768	molecular_function	GO:0019825	oxygen binding
P02768	molecular_function	GO:0016209	antioxidant activity
P02768	molecular_function	GO:0005515	protein binding
P02768	molecular_function	GO:0005507	copper ion binding
P02768	molecular_function	GO:0008144	drug binding
P02768	molecular_function	GO:0005504	fatty acid binding
P02768	molecular_function	GO:0030170	pyridoxal phosphate binding
P02768	cellular_component	GO:0031093	platelet alpha granule lumen
P02768	cellular_component	GO:0005615	extracellular space
P02768	cellular_component	GO:0043234	protein complex
P02768	cellular_component	GO:0005576	extracellular region
P02768	biological_process	GO:0006810	transport
P02768	biological_process	GO:0055085	transmembrane transport
P02768	biological_process	GO:0009267	cellular response to starvation
P02768	biological_process	GO:0007596	blood coagulation
P02768	biological_process	GO:0043069	negative regulation of programmed cell death
P02768	biological_process	GO:0043066	negative regulation of apoptotic process
P02768	biological_process	GO:0030168	platelet activation
P02768	biological_process	GO:0015721	bile acid and bile salt transport
P02768	biological_process	GO:0051659	maintenance of mitochondrion location
P02768	biological_process	GO:0044281	small molecule metabolic process
P02768	biological_process	GO:0043252	sodium-independent organic anion transport
P02768	biological_process	GO:0002576	platelet degranulation
P02768	biological_process	GO:0042157	lipoprotein metabolic process
P02768	biological_process	GO:0008206	bile acid metabolic process
P02768	biological_process	GO:0006629	lipid metabolic process
P02768	biological_process	GO:0019836	hemolysis by symbiont of host erythrocytes
P04114	molecular_function	GO:0005515	protein binding
P04114	molecular_function	GO:0046982	protein heterodimerization activity
P04114	molecular_function	GO:0008201	heparin binding
P04114	molecular_function	GO:0017127	cholesterol transporter activity
P04114	molecular_function	GO:0050750	low-density lipoprotein particle receptor binding
P04114	molecular_function	GO:0019899	enzyme binding
P04114	molecular_function	GO:0005543	phospholipid binding
P04114	cellular_component	GO:0010008	endosome membrane
P04114	cellular_component	GO:0005788	endoplasmic reticulum lumen
P04114	cellular_component	GO:0005615	extracellular space
P04114	cellular_component	GO:0034362	low-density lipoprotein particle
P04114	cellular_component	GO:0005737	cytoplasm
P04114	cellular_component	GO:0030669	clathrin-coated endocytic vesicle membrane
P04114	cellular_component	GO:0034363	intermediate-density lipoprotein particle
P04114	cellular_component	GO:0042627	chylomicron
P04114	cellular_component	GO:0034359	mature chylomicron
P04114	cellular_component	GO:0034361	very-low-density lipoprotein particle
P04114	cellular_component	GO:0005576	extracellular region
P04114	cellular_component	GO:0031904	endosome lumen
P04114	cellular_component	GO:0005886	plasma membrane
P04114	cellular_component	GO:0034360	chylomicron remnant
P04114	cellular_component	GO:0043231	intracellular membrane-bounded organelle
P04114	cellular_component	GO:0005789	endoplasmic reticulum membrane
P04114	biological_process	GO:0034383	low-density lipoprotein particle clearance
P04114	biological_process	GO:0010744	positive regulation of macrophage derived foam cell differentiation
P04114	biological_process	GO:0008203	cholesterol metabolic process
P04114	biological_process	GO:0007596	blood coagulation
P04114	biological_process	GO:0050900	leukocyte migration
P04114	biological_process	GO:0034374	low-density lipoprotein particle remodeling
P04114	biological_process	GO:0030301	cholesterol transport
P04114	biological_process	GO:0010884	positive regulation of lipid storage
P04114	biological_process	GO:0044281	small molecule metabolic process
P04114	biological_process	GO:0034379	very-low-density lipoprotein particle assembly
P04114	biological_process	GO:0006898	receptor-mediated endocytosis
P04114	biological_process	GO:0010886	positive regulation of cholesterol storage
P04114	biological_process	GO:0042632	cholesterol homeostasis
P04114	biological_process	GO:0042157	lipoprotein metabolic process
P04114	biological_process	GO:0009615	response to virus
P04114	biological_process	GO:0006629	lipid metabolic process
P04180	molecular_function	GO:0005515	protein binding
P04180	molecular_function	GO:0034186	apolipoprotein A-I binding
P04180	molecular_function	GO:0004607	phosphatidylcholine-sterol O-acyltransferase activity
P04180	cellular_component	GO:0005615	extracellular space
P04180	cellular_component	GO:0034364	high-density lipoprotein particle
P04180	cellular_component	GO:0005576	extracellular region
P04180	biological_process	GO:0034435	cholesterol esterification
P04180	biological_process	GO:0008203	cholesterol metabolic process
P04180	biological_process	GO:0030301	cholesterol transport
P04180	biological_process	GO:0044281	small molecule metabolic process
P04180	biological_process	GO:0034372	very-low-density lipoprotein particle remodeling
P04180	biological_process	GO:0006644	phospholipid metabolic process
P04180	biological_process	GO:0034375	high-density lipoprotein particle remodeling
P04180	biological_process	GO:0042632	cholesterol homeostasis
P04180	biological_process	GO:0043691	reverse cholesterol transport
P04180	biological_process	GO:0006656	phosphatidylcholine biosynthetic process
P04180	biological_process	GO:0042157	lipoprotein metabolic process
P04180	biological_process	GO:0006629	lipid metabolic process
P05090	molecular_function	GO:0005319	lipid transporter activity
P05090	molecular_function	GO:0005515	protein binding
P05090	molecular_function	GO:0015485	cholesterol binding
P05090	cellular_component	GO:0030425	dendrite
P05090	cellular_component	GO:0005783	endoplasmic reticulum
P05090	cellular_component	GO:0005615	extracellular space
P05090	cellular_component	GO:0005576	extracellular region
P05090	cellular_component	GO:0043025	neuronal cell body
P05090	cellular_component	GO:0022626	cytosolic ribosome
P05090	cellular_component	GO:0048471	perinuclear region of cytoplasm
P05090	biological_process	GO:0006869	lipid transport
P05090	biological_process	GO:2000405	negative regulation of T cell migration
P05090	biological_process	GO:0042246	tissue regeneration
P05090	biological_process	GO:0007420	brain development
P05090	biological_process	GO:0000302	response to reactive oxygen species
P05090	biological_process	GO:0010642	negative regulation of platelet-derived growth factor receptor signaling pathway
P05090	biological_process	GO:0042308	negative regulation of protein import into nucleus
P05090	biological_process	GO:0006006	glucose metabolic process
P05090	biological_process	GO:0048662	negative regulation of smooth muscle cell proliferation
P05090	biological_process	GO:0042493	response to drug
P05090	biological_process	GO:0001525	angiogenesis
P05090	biological_process	GO:0048678	response to axon injury
P05090	biological_process	GO:0071638	negative regulation of monocyte chemotactic protein-1 production
P05090	biological_process	GO:1900016	negative regulation of cytokine production involved in inflammatory response
P05090	biological_process	GO:0051895	negative regulation of focal adhesion assembly
P05090	biological_process	GO:0007568	aging
P05090	biological_process	GO:2000098	negative regulation of smooth muscle cell-matrix adhesion
P05090	biological_process	GO:0014012	peripheral nervous system axon regeneration
P05090	biological_process	GO:0060588	negative regulation of lipoprotein lipid oxidation
P05090	biological_process	GO:0006629	lipid metabolic process
P06727	molecular_function	GO:0031210	phosphatidylcholine binding
P06727	molecular_function	GO:0017127	cholesterol transporter activity
P06727	molecular_function	GO:0042803	protein homodimerization activity
P06727	molecular_function	GO:0005319	lipid transporter activity
P06727	molecular_function	GO:0008289	lipid binding
P06727	molecular_function	GO:0016209	antioxidant activity
P06727	molecular_function	GO:0060228	phosphatidylcholine-sterol O-acyltransferase activator activity
P06727	molecular_function	GO:0005507	copper ion binding
P06727	molecular_function	GO:0043499	eukaryotic cell surface binding
P06727	cellular_component	GO:0005788	endoplasmic reticulum lumen
P06727	cellular_component	GO:0009986	cell surface
P06727	cellular_component	GO:0005615	extracellular space
P06727	cellular_component	GO:0042627	chylomicron
P06727	cellular_component	GO:0034364	high-density lipoprotein particle
P06727	cellular_component	GO:0034361	very-low-density lipoprotein particle
P06727	cellular_component	GO:0005576	extracellular region
P06727	biological_process	GO:0046470	phosphatidylcholine metabolic process
P06727	biological_process	GO:0010898	positive regulation of triglyceride catabolic process
P06727	biological_process	GO:0008203	cholesterol metabolic process
P06727	biological_process	GO:0007159	leukocyte cell-cell adhesion
P06727	biological_process	GO:0006869	lipid transport
P06727	biological_process	GO:0033344	cholesterol efflux
P06727	biological_process	GO:0044281	small molecule metabolic process
P06727	biological_process	GO:0034372	very-low-density lipoprotein particle remodeling
P06727	biological_process	GO:0042632	cholesterol homeostasis
P06727	biological_process	GO:0042157	lipoprotein metabolic process
P06727	biological_process	GO:0032374	regulation of cholesterol transport
P06727	biological_process	GO:0034445	negative regulation of plasma lipoprotein particle oxidation
P06727	biological_process	GO:0019430	removal of superoxide radicals
P06727	biological_process	GO:0065005	protein-lipid complex assembly
P06727	biological_process	GO:0045723	positive regulation of fatty acid biosynthetic process
P06727	biological_process	GO:0006982	response to lipid hydroperoxide
P06727	biological_process	GO:0033700	phospholipid efflux
P06727	biological_process	GO:0034375	high-density lipoprotein particle remodeling
P06727	biological_process	GO:0051006	positive regulation of lipoprotein lipase activity
P06727	biological_process	GO:0044240	multicellular organismal lipid catabolic process
P06727	biological_process	GO:0055088	lipid homeostasis
P06727	biological_process	GO:0043691	reverse cholesterol transport
P06727	biological_process	GO:0042744	hydrogen peroxide catabolic process
P06727	biological_process	GO:0034378	chylomicron assembly
P06727	biological_process	GO:0002227	innate immune response in mucosa
P06727	biological_process	GO:0034371	chylomicron remodeling
P06727	biological_process	GO:0010873	positive regulation of cholesterol esterification
P06727	biological_process	GO:0006629	lipid metabolic process
P06858	molecular_function	GO:0004620	phospholipase activity
P06858	molecular_function	GO:0005515	protein binding
P06858	molecular_function	GO:0034185	apolipoprotein binding
P06858	molecular_function	GO:0008201	heparin binding
P06858	molecular_function	GO:0004806	triglyceride lipase activity
P06858	molecular_function	GO:0005102	receptor binding
P06858	molecular_function	GO:0004465	lipoprotein lipase activity
P06858	cellular_component	GO:0005615	extracellular space
P06858	cellular_component	GO:0005576	extracellular region
P06858	biological_process	GO:0019433	triglyceride catabolic process
P06858	biological_process	GO:0010744	positive regulation of macrophage derived foam cell differentiation
P06858	biological_process	GO:0010890	positive regulation of sequestering of triglyceride
P06858	biological_process	GO:0006641	triglyceride metabolic process
P06858	biological_process	GO:0044281	small molecule metabolic process
P06858	biological_process	GO:0034372	very-low-density lipoprotein particle remodeling
P06858	biological_process	GO:0070328	triglyceride homeostasis
P06858	biological_process	GO:0006644	phospholipid metabolic process
P06858	biological_process	GO:0010886	positive regulation of cholesterol storage
P06858	biological_process	GO:0006633	fatty acid biosynthetic process
P06858	biological_process	GO:0034371	chylomicron remodeling
P06858	biological_process	GO:0042157	lipoprotein metabolic process
P06858	biological_process	GO:0006629	lipid metabolic process
P07237	molecular_function	GO:0005515	protein binding
P07237	molecular_function	GO:0042802	identical protein binding
P07237	molecular_function	GO:0004656	procollagen-proline 4-dioxygenase activity
P07237	cellular_component	GO:0005788	endoplasmic reticulum lumen
P07237	cellular_component	GO:0009986	cell surface
P07237	cellular_component	GO:0005783	endoplasmic reticulum
P07237	cellular_component	GO:0005576	extracellular region
P07237	cellular_component	GO:0005793	endoplasmic reticulum-Golgi intermediate compartment
P07237	biological_process	GO:0030198	extracellular matrix organization
P07237	biological_process	GO:0018401	peptidyl-proline hydroxylation to 4-hydroxy-L-proline
P07237	biological_process	GO:0042157	lipoprotein metabolic process
P07237	biological_process	GO:0044281	small molecule metabolic process
P07237	biological_process	GO:0006629	lipid metabolic process
P08519	molecular_function	GO:0004252	serine-type endopeptidase activity
P08519	molecular_function	GO:0001968	fibronectin binding
P08519	molecular_function	GO:0034185	apolipoprotein binding
P08519	molecular_function	GO:0008201	heparin binding
P08519	molecular_function	GO:0004866	endopeptidase inhibitor activity
P08519	cellular_component	GO:0005576	extracellular region
P08519	cellular_component	GO:0034358	plasma lipoprotein particle
P08519	biological_process	GO:0008015	blood circulation
P08519	biological_process	GO:0010951	negative regulation of endopeptidase activity
P08519	biological_process	GO:0006898	receptor-mediated endocytosis
P08519	biological_process	GO:0042157	lipoprotein metabolic process
P08519	biological_process	GO:0044281	small molecule metabolic process
P08519	biological_process	GO:0006629	lipid metabolic process
P08684	molecular_function	GO:0008395	steroid hydroxylase activity
P08684	molecular_function	GO:0005506	iron ion binding
P08684	molecular_function	GO:0019825	oxygen binding
P08684	molecular_function	GO:0070576	vitamin D 24-hydroxylase activity
P08684	molecular_function	GO:0034875	caffeine oxidase activity
P08684	molecular_function	GO:0050649	testosterone 6-beta-hydroxylase activity
P08684	molecular_function	GO:0004497	monooxygenase activity
P08684	molecular_function	GO:0005496	steroid binding
P08684	molecular_function	GO:0019899	enzyme binding
P08684	molecular_function	GO:0030343	vitamin D3 25-hydroxylase activity
P08684	molecular_function	GO:0016491	oxidoreductase activity
P08684	cellular_component	GO:0043231	intracellular membrane-bounded organelle
P08684	cellular_component	GO:0009986	cell surface
P08684	cellular_component	GO:0005789	endoplasmic reticulum membrane
P08684	cellular_component	GO:0005737	cytoplasm
P08684	biological_process	GO:0008209	androgen metabolic process
P08684	biological_process	GO:0070989	oxidative demethylation
P08684	biological_process	GO:0016098	monoterpenoid metabolic process
P08684	biological_process	GO:0046483	heterocycle metabolic process
P08684	biological_process	GO:0006805	xenobiotic metabolic process
P08684	biological_process	GO:0055114	oxidation-reduction process
P08684	biological_process	GO:0017144	drug metabolic process
P08684	biological_process	GO:0044281	small molecule metabolic process
P08684	biological_process	GO:0006706	steroid catabolic process
P08684	biological_process	GO:0008202	steroid metabolic process
P08684	biological_process	GO:0042738	exogenous drug catabolic process
P08684	biological_process	GO:0042737	drug catabolic process
P08684	biological_process	GO:0042359	vitamin D metabolic process
P08684	biological_process	GO:0006629	lipid metabolic process
P08684	biological_process	GO:0009822	alkaloid catabolic process
P10745	molecular_function	GO:0005501	retinoid binding
P10745	biological_process	GO:0007601	visual perception
P10745	biological_process	GO:0006629	lipid metabolic process
P10909	molecular_function	GO:0051787	misfolded protein binding
P10909	molecular_function	GO:0005515	protein binding
P10909	molecular_function	GO:0031625	ubiquitin protein ligase binding
P10909	molecular_function	GO:0016887	ATPase activity
P10909	cellular_component	GO:0031012	extracellular matrix
P10909	cellular_component	GO:0031093	platelet alpha granule lumen
P10909	cellular_component	GO:0005615	extracellular space
P10909	cellular_component	GO:0005576	extracellular region
P10909	cellular_component	GO:0034366	spherical high-density lipoprotein particle
P10909	cellular_component	GO:0005739	mitochondrion
P10909	cellular_component	GO:0048471	perinuclear region of cytoplasm
P10909	biological_process	GO:0007596	blood coagulation
P10909	biological_process	GO:0051788	response to misfolded protein
P10909	biological_process	GO:0030168	platelet activation
P10909	biological_process	GO:0032436	positive regulation of proteasomal ubiquitin-dependent protein catabolic process
P10909	biological_process	GO:0061077	chaperone-mediated protein folding
P10909	biological_process	GO:0043065	positive regulation of apoptotic process
P10909	biological_process	GO:0002576	platelet degranulation
P10909	biological_process	GO:2000060	positive regulation of protein ubiquitination involved in ubiquitin-dependent protein catabolic process
P10909	biological_process	GO:0097193	intrinsic apoptotic signaling pathway
P10909	biological_process	GO:0001836	release of cytochrome c from mitochondria
P10909	biological_process	GO:0006956	complement activation
P10909	biological_process	GO:0051092	positive regulation of NF-kappaB transcription factor activity
P10909	biological_process	GO:0043066	negative regulation of apoptotic process
P10909	biological_process	GO:0032463	negative regulation of protein homooligomerization
P10909	biological_process	GO:2001244	positive regulation of intrinsic apoptotic signaling pathway
P10909	biological_process	GO:0043691	reverse cholesterol transport
P10909	biological_process	GO:0009615	response to virus
P10909	biological_process	GO:0050821	protein stabilization
P10909	biological_process	GO:0006629	lipid metabolic process
P11413	molecular_function	GO:0050661	NADP binding
P11413	molecular_function	GO:0005536	glucose binding
P11413	molecular_function	GO:0042803	protein homodimerization activity
P11413	molecular_function	GO:0004345	glucose-6-phosphate dehydrogenase activity
P11413	cellular_component	GO:0043231	intracellular membrane-bounded organelle
P11413	cellular_component	GO:0005829	cytosol
P11413	cellular_component	GO:0009898	internal side of plasma membrane
P11413	cellular_component	GO:0005813	centrosome
P11413	cellular_component	GO:0005737	cytoplasm
P11413	biological_process	GO:0019322	pentose biosynthetic process
P11413	biological_process	GO:0055114	oxidation-reduction process
P11413	biological_process	GO:0009051	pentose-phosphate shunt, oxidative branch
P11413	biological_process	GO:0044281	small molecule metabolic process
P11413	biological_process	GO:0005975	carbohydrate metabolic process
P11413	biological_process	GO:0046390	ribose phosphate biosynthetic process
P11413	biological_process	GO:0006740	NADPH regeneration
P11413	biological_process	GO:0051156	glucose 6-phosphate metabolic process
P11413	biological_process	GO:0043249	erythrocyte maturation
P11413	biological_process	GO:0006695	cholesterol biosynthetic process
P11413	biological_process	GO:0001816	cytokine production
P11413	biological_process	GO:0006749	glutathione metabolic process
P11413	biological_process	GO:0006098	pentose-phosphate shunt
P11413	biological_process	GO:0034599	cellular response to oxidative stress
P11413	biological_process	GO:0006629	lipid metabolic process
P11413	biological_process	GO:0010734	negative regulation of protein glutathionylation
P11597	molecular_function	GO:0008289	lipid binding
P11597	molecular_function	GO:0005319	lipid transporter activity
P11597	molecular_function	GO:0031210	phosphatidylcholine binding
P11597	molecular_function	GO:0015485	cholesterol binding
P11597	molecular_function	GO:0017129	triglyceride binding
P11597	molecular_function	GO:0017127	cholesterol transporter activity
P11597	molecular_function	GO:0005548	phospholipid transporter activity
P11597	cellular_component	GO:0005615	extracellular space
P11597	cellular_component	GO:0034364	high-density lipoprotein particle
P11597	cellular_component	GO:0005576	extracellular region
P11597	cellular_component	GO:0031982	vesicle
P11597	biological_process	GO:0046470	phosphatidylcholine metabolic process
P11597	biological_process	GO:0008203	cholesterol metabolic process
P11597	biological_process	GO:0006869	lipid transport
P11597	biological_process	GO:0034374	low-density lipoprotein particle remodeling
P11597	biological_process	GO:0030301	cholesterol transport
P11597	biological_process	GO:0044281	small molecule metabolic process
P11597	biological_process	GO:0034372	very-low-density lipoprotein particle remodeling
P11597	biological_process	GO:0070328	triglyceride homeostasis
P11597	biological_process	GO:0015914	phospholipid transport
P11597	biological_process	GO:0042632	cholesterol homeostasis
P11597	biological_process	GO:0042157	lipoprotein metabolic process
P11597	biological_process	GO:0055091	phospholipid homeostasis
P11597	biological_process	GO:0010874	regulation of cholesterol efflux
P11597	biological_process	GO:0006641	triglyceride metabolic process
P11597	biological_process	GO:0010745	negative regulation of macrophage derived foam cell differentiation
P11597	biological_process	GO:0006898	receptor-mediated endocytosis
P11597	biological_process	GO:0034375	high-density lipoprotein particle remodeling
P11597	biological_process	GO:0043691	reverse cholesterol transport
P11597	biological_process	GO:0055088	lipid homeostasis
P11597	biological_process	GO:0006629	lipid metabolic process
P13497	molecular_function	GO:0008233	peptidase activity
P13497	molecular_function	GO:0008237	metallopeptidase activity
P13497	molecular_function	GO:0004222	metalloendopeptidase activity
P13497	cellular_component	GO:0005576	extracellular region
P13497	biological_process	GO:0061036	positive regulation of cartilage development
P13497	biological_process	GO:0044281	small molecule metabolic process
P13497	biological_process	GO:0006508	proteolysis
P13497	biological_process	GO:0007275	multicellular organismal development
P13497	biological_process	GO:0030198	extracellular matrix organization
P13497	biological_process	GO:0001502	cartilage condensation
P13497	biological_process	GO:0001501	skeletal system development
P13497	biological_process	GO:0042157	lipoprotein metabolic process
P13497	biological_process	GO:0006629	lipid metabolic process
P15090	molecular_function	GO:0005504	fatty acid binding
P15090	cellular_component	GO:0005811	lipid particle
P15090	cellular_component	GO:0005737	cytoplasm
P15090	biological_process	GO:0019433	triglyceride catabolic process
P15090	biological_process	GO:0044281	small molecule metabolic process
P15090	biological_process	GO:0006629	lipid metabolic process
P16662	molecular_function	GO:0015020	glucuronosyltransferase activity
P16662	molecular_function	GO:0001972	retinoic acid binding
P16662	cellular_component	GO:0016020	membrane
P16662	biological_process	GO:0052695	cellular glucuronidation
P16662	biological_process	GO:0008209	androgen metabolic process
P16662	biological_process	GO:0006629	lipid metabolic process
P16671	molecular_function	GO:0008289	lipid binding
P16671	molecular_function	GO:0005041	low-density lipoprotein receptor activity
P16671	molecular_function	GO:0071813	lipoprotein particle binding
P16671	molecular_function	GO:0030169	low-density lipoprotein particle binding
P16671	molecular_function	GO:0070053	thrombospondin receptor activity
P16671	molecular_function	GO:0050431	transforming growth factor beta binding
P16671	cellular_component	GO:0045335	phagocytic vesicle
P16671	cellular_component	GO:0016020	membrane
P16671	cellular_component	GO:0009986	cell surface
P16671	cellular_component	GO:0005887	integral to plasma membrane
P16671	cellular_component	GO:0005886	plasma membrane
P16671	cellular_component	GO:0031092	platelet alpha granule membrane
P16671	biological_process	GO:0010744	positive regulation of macrophage derived foam cell differentiation
P16671	biological_process	GO:0001954	positive regulation of cell-matrix adhesion
P16671	biological_process	GO:0007596	blood coagulation
P16671	biological_process	GO:0030168	platelet activation
P16671	biological_process	GO:0007263	nitric oxide mediated signal transduction
P16671	biological_process	GO:0030301	cholesterol transport
P16671	biological_process	GO:0044281	small molecule metabolic process
P16671	biological_process	GO:0002474	antigen processing and presentation of peptide antigen via MHC class I
P16671	biological_process	GO:0002576	platelet degranulation
P16671	biological_process	GO:0044255	cellular lipid metabolic process
P16671	biological_process	GO:0019934	cGMP-mediated signaling
P16671	biological_process	GO:0034381	plasma lipoprotein particle clearance
P16671	biological_process	GO:0042953	lipoprotein transport
P16671	biological_process	GO:0044539	long-chain fatty acid import
P16671	biological_process	GO:0034383	low-density lipoprotein particle clearance
P16671	biological_process	GO:0042590	antigen processing and presentation of exogenous peptide antigen via MHC class I
P16671	biological_process	GO:0019915	lipid storage
P16671	biological_process	GO:0002479	antigen processing and presentation of exogenous peptide antigen via MHC class I, TAP-dependent
P16671	biological_process	GO:0015911	plasma membrane long-chain fatty acid transport
P16671	biological_process	GO:0006629	lipid metabolic process
P17612	molecular_function	GO:0005524	ATP binding
P17612	molecular_function	GO:0005515	protein binding
P17612	molecular_function	GO:0031625	ubiquitin protein ligase binding
P17612	molecular_function	GO:0019901	protein kinase binding
P17612	molecular_function	GO:0004691	cAMP-dependent protein kinase activity
P17612	cellular_component	GO:0016020	membrane
P17612	cellular_component	GO:0005829	cytosol
P17612	cellular_component	GO:0005813	centrosome
P17612	cellular_component	GO:0005952	cAMP-dependent protein kinase complex
P17612	biological_process	GO:0019433	triglyceride catabolic process
P17612	biological_process	GO:0006833	water transport
P17612	biological_process	GO:0000278	mitotic cell cycle
P17612	biological_process	GO:0007596	blood coagulation
P17612	biological_process	GO:0048011	nerve growth factor receptor signaling pathway
P17612	biological_process	GO:2000810	regulation of tight junction assembly
P17612	biological_process	GO:0050796	regulation of insulin secretion
P17612	biological_process	GO:0044281	small molecule metabolic process
P17612	biological_process	GO:0007243	intracellular protein kinase cascade
P17612	biological_process	GO:0007173	epidermal growth factor receptor signaling pathway
P17612	biological_process	GO:0006112	energy reserve metabolic process
P17612	biological_process	GO:0005975	carbohydrate metabolic process
P17612	biological_process	GO:0008543	fibroblast growth factor receptor signaling pathway
P17612	biological_process	GO:0006006	glucose metabolic process
P17612	biological_process	GO:0071377	cellular response to glucagon stimulus
P17612	biological_process	GO:0055085	transmembrane transport
P17612	biological_process	GO:0007165	signal transduction
P17612	biological_process	GO:0006094	gluconeogenesis
P17612	biological_process	GO:0006468	protein phosphorylation
P17612	biological_process	GO:0061136	regulation of proteasomal protein catabolic process
P17612	biological_process	GO:0071333	cellular response to glucose stimulus
P17612	biological_process	GO:0071158	positive regulation of cell cycle arrest
P17612	biological_process	GO:0018105	peptidyl-serine phosphorylation
P17612	biological_process	GO:0007202	activation of phospholipase C activity
P17612	biological_process	GO:0048240	sperm capacitation
P17612	biological_process	GO:0034199	activation of protein kinase A activity
P17612	biological_process	GO:0000086	G2/M transition of mitotic cell cycle
P17612	biological_process	GO:0045667	regulation of osteoblast differentiation
P17612	biological_process	GO:0006629	lipid metabolic process
P18827	molecular_function	GO:0008022	protein C-terminus binding
P18827	molecular_function	GO:0005515	protein binding
P18827	cellular_component	GO:0005887	integral to plasma membrane
P18827	cellular_component	GO:0005925	focal adhesion
P18827	cellular_component	GO:0043202	lysosomal lumen
P18827	cellular_component	GO:0005886	plasma membrane
P18827	cellular_component	GO:0005737	cytoplasm
P18827	cellular_component	GO:0005796	Golgi lumen
P18827	biological_process	GO:0055002	striated muscle cell development
P18827	biological_process	GO:0006024	glycosaminoglycan biosynthetic process
P18827	biological_process	GO:0044281	small molecule metabolic process
P18827	biological_process	GO:0005975	carbohydrate metabolic process
P18827	biological_process	GO:0048627	myoblast development
P18827	biological_process	GO:0006027	glycosaminoglycan catabolic process
P18827	biological_process	GO:0042157	lipoprotein metabolic process
P18827	biological_process	GO:0006629	lipid metabolic process
P18827	biological_process	GO:0030203	glycosaminoglycan metabolic process
P18827	biological_process	GO:0030204	chondroitin sulfate metabolic process
P19835	molecular_function	GO:0016787	hydrolase activity
P19835	molecular_function	GO:0004091	carboxylesterase activity
P19835	molecular_function	GO:0047372	acylglycerol lipase activity
P19835	molecular_function	GO:0008201	heparin binding
P19835	molecular_function	GO:0004806	triglyceride lipase activity
P19835	molecular_function	GO:0003824	catalytic activity
P19835	molecular_function	GO:0004771	sterol esterase activity
P19835	cellular_component	GO:0005615	extracellular space
P19835	cellular_component	GO:0005829	cytosol
P19835	cellular_component	GO:0005576	extracellular region
P19835	cellular_component	GO:0005737	cytoplasm
P19835	biological_process	GO:0044241	lipid digestion
P19835	biological_process	GO:0006641	triglyceride metabolic process
P19835	biological_process	GO:0018350	protein esterification
P19835	biological_process	GO:0044281	small molecule metabolic process
P19835	biological_process	GO:0044258	intestinal lipid catabolic process
P19835	biological_process	GO:0006707	cholesterol catabolic process
P19835	biological_process	GO:0030299	intestinal cholesterol absorption
P19835	biological_process	GO:0030157	pancreatic juice secretion
P19835	biological_process	GO:0009062	fatty acid catabolic process
P19835	biological_process	GO:0006629	lipid metabolic process
P21439	molecular_function	GO:0042626	ATPase activity, coupled to transmembrane movement of substances
P21439	cellular_component	GO:0016020	membrane
P21439	cellular_component	GO:0016324	apical plasma membrane
P21439	cellular_component	GO:0005887	integral to plasma membrane
P21439	cellular_component	GO:0046581	intercellular canaliculus
P21439	cellular_component	GO:0016021	integral to membrane
P21439	cellular_component	GO:0005886	plasma membrane
P21439	cellular_component	GO:0000139	Golgi membrane
P21439	biological_process	GO:0006810	transport
P21439	biological_process	GO:0055085	transmembrane transport
P21439	biological_process	GO:0042493	response to drug
P21439	biological_process	GO:0044255	cellular lipid metabolic process
P21439	biological_process	GO:0044281	small molecule metabolic process
P21439	biological_process	GO:0006629	lipid metabolic process
P22694	molecular_function	GO:0000287	magnesium ion binding
P22694	molecular_function	GO:0005524	ATP binding
P22694	molecular_function	GO:0005515	protein binding
P22694	molecular_function	GO:0031625	ubiquitin protein ligase binding
P22694	molecular_function	GO:0004691	cAMP-dependent protein kinase activity
P22694	cellular_component	GO:0005654	nucleoplasm
P22694	cellular_component	GO:0005829	cytosol
P22694	cellular_component	GO:0005813	centrosome
P22694	cellular_component	GO:0005952	cAMP-dependent protein kinase complex
P22694	biological_process	GO:0019433	triglyceride catabolic process
P22694	biological_process	GO:0006833	water transport
P22694	biological_process	GO:0007596	blood coagulation
P22694	biological_process	GO:0048011	nerve growth factor receptor signaling pathway
P22694	biological_process	GO:0050796	regulation of insulin secretion
P22694	biological_process	GO:0044281	small molecule metabolic process
P22694	biological_process	GO:0007243	intracellular protein kinase cascade
P22694	biological_process	GO:0007173	epidermal growth factor receptor signaling pathway
P22694	biological_process	GO:0006112	energy reserve metabolic process
P22694	biological_process	GO:0005975	carbohydrate metabolic process
P22694	biological_process	GO:0008543	fibroblast growth factor receptor signaling pathway
P22694	biological_process	GO:0007188	adenylate cyclase-modulating G-protein coupled receptor signaling pathway
P22694	biological_process	GO:0006006	glucose metabolic process
P22694	biological_process	GO:0071377	cellular response to glucagon stimulus
P22694	biological_process	GO:0055085	transmembrane transport
P22694	biological_process	GO:0007165	signal transduction
P22694	biological_process	GO:0006094	gluconeogenesis
P22694	biological_process	GO:0006468	protein phosphorylation
P22694	biological_process	GO:0007202	activation of phospholipase C activity
P22694	biological_process	GO:0034199	activation of protein kinase A activity
P22694	biological_process	GO:0007268	synaptic transmission
P22694	biological_process	GO:0006629	lipid metabolic process
P23219	molecular_function	GO:0004666	prostaglandin-endoperoxide synthase activity
P23219	cellular_component	GO:0043231	intracellular membrane-bounded organelle
P23219	cellular_component	GO:0005634	nucleus
P23219	cellular_component	GO:0005789	endoplasmic reticulum membrane
P23219	cellular_component	GO:0044444	cytoplasmic part
P23219	cellular_component	GO:0005737	cytoplasm
P23219	biological_process	GO:0019371	cyclooxygenase pathway
P23219	biological_process	GO:0008217	regulation of blood pressure
P23219	biological_process	GO:0006805	xenobiotic metabolic process
P23219	biological_process	GO:0001516	prostaglandin biosynthetic process
P23219	biological_process	GO:0044281	small molecule metabolic process
P23219	biological_process	GO:0006629	lipid metabolic process
P24468	molecular_function	GO:0005515	protein binding
P24468	molecular_function	GO:0003714	transcription corepressor activity
P24468	molecular_function	GO:0043565	sequence-specific DNA binding
P24468	molecular_function	GO:0042803	protein homodimerization activity
P24468	molecular_function	GO:0004879	ligand-activated sequence-specific DNA binding RNA polymerase II transcription factor activity
P24468	molecular_function	GO:0003700	sequence-specific DNA binding transcription factor activity
P24468	molecular_function	GO:0001972	retinoic acid binding
P24468	cellular_component	GO:0005634	nucleus
P24468	biological_process	GO:0045892	negative regulation of transcription, DNA-dependent
P24468	biological_process	GO:0001937	negative regulation of endothelial cell proliferation
P24468	biological_process	GO:0007165	signal transduction
P24468	biological_process	GO:0010596	negative regulation of endothelial cell migration
P24468	biological_process	GO:0045736	negative regulation of cyclin-dependent protein kinase activity
P24468	biological_process	GO:0045893	positive regulation of transcription, DNA-dependent
P24468	biological_process	GO:0000122	negative regulation of transcription from RNA polymerase II promoter
P24468	biological_process	GO:0030522	intracellular receptor mediated signaling pathway
P24468	biological_process	GO:0006357	regulation of transcription from RNA polymerase II promoter
P24468	biological_process	GO:0060849	regulation of transcription involved in lymphatic endothelial cell fate commitment
P24468	biological_process	GO:0006629	lipid metabolic process
P25705	molecular_function	GO:0005524	ATP binding
P25705	molecular_function	GO:0005515	protein binding
P25705	molecular_function	GO:0042288	MHC class I protein binding
P25705	molecular_function	GO:0043499	eukaryotic cell surface binding
P25705	molecular_function	GO:0046933	hydrogen ion transporting ATP synthase activity, rotational mechanism
P25705	molecular_function	GO:0022857	transmembrane transporter activity
P25705	molecular_function	GO:0016887	ATPase activity
P25705	cellular_component	GO:0005759	mitochondrial matrix
P25705	cellular_component	GO:0005753	mitochondrial proton-transporting ATP synthase complex
P25705	cellular_component	GO:0008180	signalosome
P25705	cellular_component	GO:0005743	mitochondrial inner membrane
P25705	cellular_component	GO:0005739	mitochondrion
P25705	cellular_component	GO:0005886	plasma membrane
P25705	biological_process	GO:0006754	ATP biosynthetic process
P25705	biological_process	GO:0001937	negative regulation of endothelial cell proliferation
P25705	biological_process	GO:0022904	respiratory electron transport chain
P25705	biological_process	GO:0042776	mitochondrial ATP synthesis coupled proton transport
P25705	biological_process	GO:0009790	embryo development
P25705	biological_process	GO:0044281	small molecule metabolic process
P25705	biological_process	GO:0006629	lipid metabolic process
P28039	molecular_function	GO:0004465	lipoprotein lipase activity
P28039	molecular_function	GO:0003824	catalytic activity
P28039	biological_process	GO:0006954	inflammatory response
P28039	biological_process	GO:0006629	lipid metabolic process
P35790	molecular_function	GO:0004305	ethanolamine kinase activity
P35790	molecular_function	GO:0008144	drug binding
P35790	molecular_function	GO:0004103	choline kinase activity
P35790	molecular_function	GO:0004871	signal transducer activity
P35790	cellular_component	GO:0005829	cytosol
P35790	biological_process	GO:0006646	phosphatidylethanolamine biosynthetic process
P35790	biological_process	GO:0007165	signal transduction
P35790	biological_process	GO:0006869	lipid transport
P35790	biological_process	GO:0046474	glycerophospholipid biosynthetic process
P35790	biological_process	GO:0044281	small molecule metabolic process
P35790	biological_process	GO:0006644	phospholipid metabolic process
P35790	biological_process	GO:0006656	phosphatidylcholine biosynthetic process
P35790	biological_process	GO:0006629	lipid metabolic process
P36873	molecular_function	GO:0005515	protein binding
P36873	molecular_function	GO:0004721	phosphoprotein phosphatase activity
P36873	molecular_function	GO:0004722	protein serine/threonine phosphatase activity
P36873	molecular_function	GO:0019901	protein kinase binding
P36873	cellular_component	GO:0005634	nucleus
P36873	cellular_component	GO:0005737	cytoplasm
P36873	cellular_component	GO:0005730	nucleolus
P36873	cellular_component	GO:0072357	PTW/PP1 phosphatase complex
P36873	cellular_component	GO:0005829	cytosol
P36873	cellular_component	GO:0043234	protein complex
P36873	cellular_component	GO:0070688	MLL5-L complex
P36873	cellular_component	GO:0005739	mitochondrion
P36873	biological_process	GO:0019433	triglyceride catabolic process
P36873	biological_process	GO:0000278	mitotic cell cycle
P36873	biological_process	GO:0000087	M phase of mitotic cell cycle
P36873	biological_process	GO:0000236	mitotic prometaphase
P36873	biological_process	GO:0044281	small molecule metabolic process
P36873	biological_process	GO:0007179	transforming growth factor beta receptor signaling pathway
P36873	biological_process	GO:0030512	negative regulation of transforming growth factor beta receptor signaling pathway
P36873	biological_process	GO:0006629	lipid metabolic process
P36956	molecular_function	GO:0003677	DNA binding
P36956	molecular_function	GO:0005515	protein binding
P36956	molecular_function	GO:0032810	sterol response element binding
P36956	molecular_function	GO:0003700	sequence-specific DNA binding transcription factor activity
P36956	cellular_component	GO:0005783	endoplasmic reticulum
P36956	cellular_component	GO:0005634	nucleus
P36956	cellular_component	GO:0005635	nuclear envelope
P36956	cellular_component	GO:0005789	endoplasmic reticulum membrane
P36956	cellular_component	GO:0044444	cytoplasmic part
P36956	biological_process	GO:0010867	positive regulation of triglyceride biosynthetic process
P36956	biological_process	GO:0006357	regulation of transcription from RNA polymerase II promoter
P36956	biological_process	GO:0009267	cellular response to starvation
P36956	biological_process	GO:0045944	positive regulation of transcription from RNA polymerase II promoter
P36956	biological_process	GO:0008610	lipid biosynthetic process
P36956	biological_process	GO:0006629	lipid metabolic process
P37231	molecular_function	GO:0003677	DNA binding
P37231	molecular_function	GO:0030374	ligand-dependent nuclear receptor transcription coactivator activity
P37231	molecular_function	GO:0044212	transcription regulatory region DNA binding
P37231	molecular_function	GO:0004879	ligand-activated sequence-specific DNA binding RNA polymerase II transcription factor activity
P37231	molecular_function	GO:0050544	arachidonic acid binding
P37231	molecular_function	GO:0046965	retinoid X receptor binding
P37231	molecular_function	GO:0005515	protein binding
P37231	molecular_function	GO:0004955	prostaglandin receptor activity
P37231	molecular_function	GO:0008144	drug binding
P37231	molecular_function	GO:0043565	sequence-specific DNA binding
P37231	molecular_function	GO:0019899	enzyme binding
P37231	molecular_function	GO:0003700	sequence-specific DNA binding transcription factor activity
P37231	molecular_function	GO:0033613	activating transcription factor binding
P37231	cellular_component	GO:0005654	nucleoplasm
P37231	cellular_component	GO:0005634	nucleus
P37231	cellular_component	GO:0005829	cytosol
P37231	biological_process	GO:0008217	regulation of blood pressure
P37231	biological_process	GO:0010891	negative regulation of sequestering of triglyceride
P37231	biological_process	GO:0001890	placenta development
P37231	biological_process	GO:0042593	glucose homeostasis
P37231	biological_process	GO:0035357	peroxisome proliferator activated receptor signaling pathway
P37231	biological_process	GO:0060694	regulation of cholesterol transporter activity
P37231	biological_process	GO:0006917	induction of apoptosis
P37231	biological_process	GO:0045087	innate immune response
P37231	biological_process	GO:0045892	negative regulation of transcription, DNA-dependent
P37231	biological_process	GO:0033993	response to lipid
P37231	biological_process	GO:0055098	response to low-density lipoprotein particle stimulus
P37231	biological_process	GO:0007165	signal transduction
P37231	biological_process	GO:0045600	positive regulation of fat cell differentiation
P37231	biological_process	GO:0060336	negative regulation of interferon-gamma-mediated signaling pathway
P37231	biological_process	GO:0048469	cell maturation
P37231	biological_process	GO:0045944	positive regulation of transcription from RNA polymerase II promoter
P37231	biological_process	GO:0055088	lipid homeostasis
P37231	biological_process	GO:0006919	activation of cysteine-type endopeptidase activity involved in apoptotic process
P37231	biological_process	GO:0006367	transcription initiation from RNA polymerase II promoter
P37231	biological_process	GO:0006629	lipid metabolic process
P37231	biological_process	GO:0050872	white fat cell differentiation
P37231	biological_process	GO:0045893	positive regulation of transcription, DNA-dependent
P37231	biological_process	GO:0000122	negative regulation of transcription from RNA polymerase II promoter
P37231	biological_process	GO:0051091	positive regulation of sequence-specific DNA binding transcription factor activity
P37231	biological_process	GO:0007584	response to nutrient
P37231	biological_process	GO:0042953	lipoprotein transport
P37231	biological_process	GO:0045713	low-density lipoprotein particle receptor biosynthetic process
P37231	biological_process	GO:0048662	negative regulation of smooth muscle cell proliferation
P37231	biological_process	GO:0015909	long-chain fatty acid transport
P37231	biological_process	GO:0045165	cell fate commitment
P37231	biological_process	GO:0032526	response to retinoic acid
P37231	biological_process	GO:0010887	negative regulation of cholesterol storage
P37231	biological_process	GO:0032869	cellular response to insulin stimulus
P37231	biological_process	GO:0010745	negative regulation of macrophage derived foam cell differentiation
P37231	biological_process	GO:0010467	gene expression
P37231	biological_process	GO:0010871	negative regulation of receptor biosynthetic process
P37231	biological_process	GO:0030224	monocyte differentiation
P37231	biological_process	GO:0030855	epithelial cell differentiation
P41238	molecular_function	GO:0003723	RNA binding
P41238	molecular_function	GO:0005515	protein binding
P41238	molecular_function	GO:0004126	cytidine deaminase activity
P41238	cellular_component	GO:0005654	nucleoplasm
P41238	cellular_component	GO:0005737	cytoplasm
P41238	biological_process	GO:0006396	RNA processing
P41238	biological_process	GO:0016554	cytidine to uridine editing
P41238	biological_process	GO:0010467	gene expression
P41238	biological_process	GO:0080111	DNA demethylation
P41238	biological_process	GO:0016556	mRNA modification
P41238	biological_process	GO:0090310	negative regulation of methylation-dependent chromatin silencing
P41238	biological_process	GO:0006629	lipid metabolic process
P43353	molecular_function	GO:0004028	3-chloroallyl aldehyde dehydrogenase activity
P43353	molecular_function	GO:0004030	aldehyde dehydrogenase [NAD(P)+] activity
P43353	cellular_component	GO:0005737	cytoplasm
P43353	biological_process	GO:0034599	cellular response to oxidative stress
P43353	biological_process	GO:0046185	aldehyde catabolic process
P43353	biological_process	GO:0006066	alcohol metabolic process
P43353	biological_process	GO:0055114	oxidation-reduction process
P43353	biological_process	GO:0006629	lipid metabolic process
P45844	molecular_function	GO:0005524	ATP binding
P45844	molecular_function	GO:0015485	cholesterol binding
P45844	molecular_function	GO:0046982	protein heterodimerization activity
P45844	molecular_function	GO:0017127	cholesterol transporter activity
P45844	molecular_function	GO:0042803	protein homodimerization activity
P45844	molecular_function	GO:0046983	protein dimerization activity
P45844	molecular_function	GO:0005543	phospholipid binding
P45844	molecular_function	GO:0043531	ADP binding
P45844	molecular_function	GO:0019534	toxin transporter activity
P45844	molecular_function	GO:0034041	sterol-transporting ATPase activity
P45844	molecular_function	GO:0034437	glycoprotein transporter activity
P45844	molecular_function	GO:0005548	phospholipid transporter activity
P45844	cellular_component	GO:0005768	endosome
P45844	cellular_component	GO:0009897	external side of plasma membrane
P45844	cellular_component	GO:0005887	integral to plasma membrane
P45844	cellular_component	GO:0005794	Golgi apparatus
P45844	cellular_component	GO:0005739	mitochondrion
P45844	cellular_component	GO:0055037	recycling endosome
P45844	cellular_component	GO:0005886	plasma membrane
P45844	biological_process	GO:0034436	glycoprotein transport
P45844	biological_process	GO:0042987	amyloid precursor protein catabolic process
P45844	biological_process	GO:0008203	cholesterol metabolic process
P45844	biological_process	GO:0009720	detection of hormone stimulus
P45844	biological_process	GO:0006355	regulation of transcription, DNA-dependent
P45844	biological_process	GO:0034374	low-density lipoprotein particle remodeling
P45844	biological_process	GO:0010872	regulation of cholesterol esterification
P45844	biological_process	GO:0033344	cholesterol efflux
P45844	biological_process	GO:0044281	small molecule metabolic process
P45844	biological_process	GO:0010033	response to organic substance
P45844	biological_process	GO:0042632	cholesterol homeostasis
P45844	biological_process	GO:0042157	lipoprotein metabolic process
P45844	biological_process	GO:0055091	phospholipid homeostasis
P45844	biological_process	GO:0055085	transmembrane transport
P45844	biological_process	GO:0033993	response to lipid
P45844	biological_process	GO:0010887	negative regulation of cholesterol storage
P45844	biological_process	GO:0010745	negative regulation of macrophage derived foam cell differentiation
P45844	biological_process	GO:0032367	intracellular cholesterol transport
P45844	biological_process	GO:0033700	phospholipid efflux
P45844	biological_process	GO:0034375	high-density lipoprotein particle remodeling
P45844	biological_process	GO:0045542	positive regulation of cholesterol biosynthetic process
P45844	biological_process	GO:0043691	reverse cholesterol transport
P45844	biological_process	GO:0006629	lipid metabolic process
P48448	molecular_function	GO:0004028	3-chloroallyl aldehyde dehydrogenase activity
P48448	biological_process	GO:0006066	alcohol metabolic process
P48448	biological_process	GO:0006629	lipid metabolic process
P54317	molecular_function	GO:0004620	phospholipase activity
P54317	molecular_function	GO:0005509	calcium ion binding
P54317	molecular_function	GO:0047372	acylglycerol lipase activity
P54317	molecular_function	GO:0047714	galactolipase activity
P54317	cellular_component	GO:0005615	extracellular space
P54317	cellular_component	GO:0005576	extracellular region
P54317	biological_process	GO:0009395	phospholipid catabolic process
P54317	biological_process	GO:0019376	galactolipid catabolic process
P54317	biological_process	GO:0044241	lipid digestion
P54317	biological_process	GO:0006641	triglyceride metabolic process
P54317	biological_process	GO:0044281	small molecule metabolic process
P54317	biological_process	GO:0006629	lipid metabolic process
P55056	molecular_function	GO:0005319	lipid transporter activity
P55056	cellular_component	GO:0034364	high-density lipoprotein particle
P55056	cellular_component	GO:0034361	very-low-density lipoprotein particle
P55056	biological_process	GO:0070328	triglyceride homeostasis
P55056	biological_process	GO:0010890	positive regulation of sequestering of triglyceride
P55056	biological_process	GO:0006629	lipid metabolic process
P55157	molecular_function	GO:0005319	lipid transporter activity
P55157	cellular_component	GO:0005788	endoplasmic reticulum lumen
P55157	biological_process	GO:0042157	lipoprotein metabolic process
P55157	biological_process	GO:0044281	small molecule metabolic process
P55157	biological_process	GO:0006629	lipid metabolic process
P55916	molecular_function	GO:0005215	transporter activity
P55916	cellular_component	GO:0005743	mitochondrial inner membrane
P55916	cellular_component	GO:0005739	mitochondrion
P55916	biological_process	GO:0007585	respiratory gaseous exchange
P55916	biological_process	GO:0022904	respiratory electron transport chain
P55916	biological_process	GO:0015992	proton transport
P55916	biological_process	GO:0044281	small molecule metabolic process
P55916	biological_process	GO:0006629	lipid metabolic process
P62136	molecular_function	GO:0005515	protein binding
P62136	cellular_component	GO:0005634	nucleus
P62136	cellular_component	GO:0072357	PTW/PP1 phosphatase complex
P62136	cellular_component	GO:0005829	cytosol
P62136	cellular_component	GO:0070688	MLL5-L complex
P62136	cellular_component	GO:0005737	cytoplasm
P62136	biological_process	GO:0019433	triglyceride catabolic process
P62136	biological_process	GO:0007179	transforming growth factor beta receptor signaling pathway
P62136	biological_process	GO:0030512	negative regulation of transforming growth factor beta receptor signaling pathway
P62136	biological_process	GO:0044281	small molecule metabolic process
P62136	biological_process	GO:0006629	lipid metabolic process
P62140	molecular_function	GO:0017018	myosin phosphatase activity
P62140	molecular_function	GO:0005515	protein binding
P62140	molecular_function	GO:0050115	myosin-light-chain-phosphatase activity
P62140	molecular_function	GO:0019901	protein kinase binding
P62140	cellular_component	GO:0072357	PTW/PP1 phosphatase complex
P62140	cellular_component	GO:0070688	MLL5-L complex
P62140	biological_process	GO:0019433	triglyceride catabolic process
P62140	biological_process	GO:0007179	transforming growth factor beta receptor signaling pathway
P62140	biological_process	GO:0030512	negative regulation of transforming growth factor beta receptor signaling pathway
P62140	biological_process	GO:0030155	regulation of cell adhesion
P62140	biological_process	GO:0044281	small molecule metabolic process
P62140	biological_process	GO:0006629	lipid metabolic process
P98160	molecular_function	GO:0008022	protein C-terminus binding
P98160	molecular_function	GO:0005515	protein binding
P98160	cellular_component	GO:0031012	extracellular matrix
P98160	cellular_component	GO:0005615	extracellular space
P98160	cellular_component	GO:0043202	lysosomal lumen
P98160	cellular_component	GO:0005576	extracellular region
P98160	cellular_component	GO:0005886	plasma membrane
P98160	cellular_component	GO:0005796	Golgi lumen
P98160	biological_process	GO:0006024	glycosaminoglycan biosynthetic process
P98160	biological_process	GO:0044281	small molecule metabolic process
P98160	biological_process	GO:0005975	carbohydrate metabolic process
P98160	biological_process	GO:0006027	glycosaminoglycan catabolic process
P98160	biological_process	GO:0042157	lipoprotein metabolic process
P98160	biological_process	GO:0006629	lipid metabolic process
P98160	biological_process	GO:0030203	glycosaminoglycan metabolic process
P98160	biological_process	GO:0030204	chondroitin sulfate metabolic process
P98164	molecular_function	GO:0005515	protein binding
P98164	cellular_component	GO:0016324	apical plasma membrane
P98164	cellular_component	GO:0005764	lysosome
P98164	cellular_component	GO:0005886	plasma membrane
P98164	biological_process	GO:0008202	steroid metabolic process
P98164	biological_process	GO:0006486	protein glycosylation
P98164	biological_process	GO:0006897	endocytosis
P98164	biological_process	GO:0042359	vitamin D metabolic process
P98164	biological_process	GO:0044281	small molecule metabolic process
P98164	biological_process	GO:0006629	lipid metabolic process
Q00169	molecular_function	GO:0008526	phosphatidylinositol transporter activity
Q00169	molecular_function	GO:0008525	phosphatidylcholine transporter activity
Q00169	biological_process	GO:0007601	visual perception
Q00169	biological_process	GO:0007411	axon guidance
Q00169	biological_process	GO:0006629	lipid metabolic process
Q01469	molecular_function	GO:0008289	lipid binding
Q01469	molecular_function	GO:0005515	protein binding
Q01469	molecular_function	GO:0005504	fatty acid binding
Q01469	cellular_component	GO:0005737	cytoplasm
Q01469	biological_process	GO:0008544	epidermis development
Q01469	biological_process	GO:0006629	lipid metabolic process
Q01968	molecular_function	GO:0052745	inositol phosphate phosphatase activity
Q01968	molecular_function	GO:0005515	protein binding
Q01968	cellular_component	GO:0005795	Golgi stack
Q01968	cellular_component	GO:0030136	clathrin-coated vesicle
Q01968	cellular_component	GO:0005829	cytosol
Q01968	cellular_component	GO:0005798	Golgi-associated vesicle
Q01968	cellular_component	GO:0005769	early endosome
Q01968	cellular_component	GO:0001750	photoreceptor outer segment
Q01968	biological_process	GO:0042384	cilium assembly
Q01968	biological_process	GO:0007264	small GTPase mediated signal transduction
Q01968	biological_process	GO:0006644	phospholipid metabolic process
Q01968	biological_process	GO:0006661	phosphatidylinositol biosynthetic process
Q01968	biological_process	GO:0051056	regulation of small GTPase mediated signal transduction
Q01968	biological_process	GO:0044281	small molecule metabolic process
Q01968	biological_process	GO:0006629	lipid metabolic process
Q03181	molecular_function	GO:0008289	lipid binding
Q03181	molecular_function	GO:0003677	DNA binding
Q03181	molecular_function	GO:0070539	linoleic acid binding
Q03181	molecular_function	GO:0008144	drug binding
Q03181	molecular_function	GO:0005504	fatty acid binding
Q03181	molecular_function	GO:0004879	ligand-activated sequence-specific DNA binding RNA polymerase II transcription factor activity
Q03181	molecular_function	GO:0003700	sequence-specific DNA binding transcription factor activity
Q03181	cellular_component	GO:0005654	nucleoplasm
Q03181	cellular_component	GO:0005634	nucleus
Q03181	biological_process	GO:0008203	cholesterol metabolic process
Q03181	biological_process	GO:0045893	positive regulation of transcription, DNA-dependent
Q03181	biological_process	GO:0008366	axon ensheathment
Q03181	biological_process	GO:0007566	embryo implantation
Q03181	biological_process	GO:0000122	negative regulation of transcription from RNA polymerase II promoter
Q03181	biological_process	GO:0006357	regulation of transcription from RNA polymerase II promoter
Q03181	biological_process	GO:0006635	fatty acid beta-oxidation
Q03181	biological_process	GO:0008283	cell proliferation
Q03181	biological_process	GO:0045892	negative regulation of transcription, DNA-dependent
Q03181	biological_process	GO:0006006	glucose metabolic process
Q03181	biological_process	GO:0046697	decidualization
Q03181	biological_process	GO:0015908	fatty acid transport
Q03181	biological_process	GO:0045600	positive regulation of fat cell differentiation
Q03181	biological_process	GO:0006091	generation of precursor metabolites and energy
Q03181	biological_process	GO:0006915	apoptotic process
Q03181	biological_process	GO:0030522	intracellular receptor mediated signaling pathway
Q03181	biological_process	GO:0015758	glucose transport
Q03181	biological_process	GO:0010467	gene expression
Q03181	biological_process	GO:0009062	fatty acid catabolic process
Q03181	biological_process	GO:0006367	transcription initiation from RNA polymerase II promoter
Q03181	biological_process	GO:0006629	lipid metabolic process
Q05469	molecular_function	GO:0005515	protein binding
Q05469	cellular_component	GO:0005811	lipid particle
Q05469	biological_process	GO:0019433	triglyceride catabolic process
Q05469	biological_process	GO:0016042	lipid catabolic process
Q05469	biological_process	GO:0006468	protein phosphorylation
Q05469	biological_process	GO:0044281	small molecule metabolic process
Q05469	biological_process	GO:0006629	lipid metabolic process
Q07869	molecular_function	GO:0003707	steroid hormone receptor activity
Q07869	molecular_function	GO:0003677	DNA binding
Q07869	molecular_function	GO:0001103	RNA polymerase II repressing transcription factor binding
Q07869	molecular_function	GO:0004879	ligand-activated sequence-specific DNA binding RNA polymerase II transcription factor activity
Q07869	molecular_function	GO:0031624	ubiquitin conjugating enzyme binding
Q07869	molecular_function	GO:0008289	lipid binding
Q07869	molecular_function	GO:0005515	protein binding
Q07869	molecular_function	GO:0008144	drug binding
Q07869	molecular_function	GO:0043565	sequence-specific DNA binding
Q07869	molecular_function	GO:0003700	sequence-specific DNA binding transcription factor activity
Q07869	cellular_component	GO:0005654	nucleoplasm
Q07869	cellular_component	GO:0005634	nucleus
Q07869	biological_process	GO:0072369	regulation of lipid transport by positive regulation of transcription from RNA polymerase II promoter
Q07869	biological_process	GO:0072363	regulation of glycolysis by positive regulation of transcription from RNA polymerase II promoter
Q07869	biological_process	GO:0010891	negative regulation of sequestering of triglyceride
Q07869	biological_process	GO:0046321	positive regulation of fatty acid oxidation
Q07869	biological_process	GO:0045893	positive regulation of transcription, DNA-dependent
Q07869	biological_process	GO:0044281	small molecule metabolic process
Q07869	biological_process	GO:0000122	negative regulation of transcription from RNA polymerase II promoter
Q07869	biological_process	GO:0044255	cellular lipid metabolic process
Q07869	biological_process	GO:0072366	regulation of cellular ketone metabolic process by positive regulation of transcription from RNA polymerase II promoter
Q07869	biological_process	GO:0032000	positive regulation of fatty acid beta-oxidation
Q07869	biological_process	GO:0015908	fatty acid transport
Q07869	biological_process	GO:0010887	negative regulation of cholesterol storage
Q07869	biological_process	GO:0032099	negative regulation of appetite
Q07869	biological_process	GO:0030522	intracellular receptor mediated signaling pathway
Q07869	biological_process	GO:0010745	negative regulation of macrophage derived foam cell differentiation
Q07869	biological_process	GO:0010467	gene expression
Q07869	biological_process	GO:0010871	negative regulation of receptor biosynthetic process
Q07869	biological_process	GO:0045944	positive regulation of transcription from RNA polymerase II promoter
Q07869	biological_process	GO:0045820	negative regulation of glycolysis
Q07869	biological_process	GO:0006367	transcription initiation from RNA polymerase II promoter
Q07869	biological_process	GO:0006629	lipid metabolic process
Q12772	molecular_function	GO:0000978	RNA polymerase II core promoter proximal region sequence-specific DNA binding
Q12772	molecular_function	GO:0070888	E-box binding
Q12772	molecular_function	GO:0008022	protein C-terminus binding
Q12772	molecular_function	GO:0005515	protein binding
Q12772	molecular_function	GO:0000247	C-8 sterol isomerase activity
Q12772	cellular_component	GO:0032937	SREBP-SCAP-Insig complex
Q12772	cellular_component	GO:0005783	endoplasmic reticulum
Q12772	cellular_component	GO:0005634	nucleus
Q12772	cellular_component	GO:0005737	cytoplasm
Q12772	biological_process	GO:0071499	cellular response to laminar fluid shear stress
Q12772	biological_process	GO:0000122	negative regulation of transcription from RNA polymerase II promoter
Q12772	biological_process	GO:0055098	response to low-density lipoprotein particle stimulus
Q12772	biological_process	GO:0072368	regulation of lipid transport by negative regulation of transcription from RNA polymerase II promoter
Q12772	biological_process	GO:0045944	positive regulation of transcription from RNA polymerase II promoter
Q12772	biological_process	GO:0010886	positive regulation of cholesterol storage
Q12772	biological_process	GO:0090370	negative regulation of cholesterol efflux
Q12772	biological_process	GO:0006629	lipid metabolic process
Q13790	molecular_function	GO:0005319	lipid transporter activity
Q13790	molecular_function	GO:0015485	cholesterol binding
Q13790	molecular_function	GO:0005102	receptor binding
Q13790	cellular_component	GO:0005576	extracellular region
Q13790	biological_process	GO:0006869	lipid transport
Q13790	biological_process	GO:0006629	lipid metabolic process
Q14114	molecular_function	GO:0030229	very-low-density lipoprotein particle receptor activity
Q14114	molecular_function	GO:0005515	protein binding
Q14114	molecular_function	GO:0034185	apolipoprotein binding
Q14114	molecular_function	GO:0004888	transmembrane signaling receptor activity
Q14114	molecular_function	GO:0038025	reelin receptor activity
Q14114	cellular_component	GO:0005901	caveola
Q14114	cellular_component	GO:0016021	integral to membrane
Q14114	cellular_component	GO:0005886	plasma membrane
Q14114	biological_process	GO:0050731	positive regulation of peptidyl-tyrosine phosphorylation
Q14114	biological_process	GO:1900006	positive regulation of dendrite development
Q14114	biological_process	GO:0007596	blood coagulation
Q14114	biological_process	GO:0007165	signal transduction
Q14114	biological_process	GO:0061098	positive regulation of protein tyrosine kinase activity
Q14114	biological_process	GO:0021541	ammon gyrus development
Q14114	biological_process	GO:0050804	regulation of synaptic transmission
Q14114	biological_process	GO:0000122	negative regulation of transcription from RNA polymerase II promoter
Q14114	biological_process	GO:0032793	positive regulation of CREB transcription factor activity
Q14114	biological_process	GO:0006508	proteolysis
Q14114	biological_process	GO:0038026	reelin-mediated signaling pathway
Q14114	biological_process	GO:0006897	endocytosis
Q14114	biological_process	GO:0019221	cytokine-mediated signaling pathway
Q14114	biological_process	GO:0061003	positive regulation of dendritic spine morphogenesis
Q14114	biological_process	GO:0006629	lipid metabolic process
Q14703	molecular_function	GO:0004252	serine-type endopeptidase activity
Q14703	cellular_component	GO:0005788	endoplasmic reticulum lumen
Q14703	cellular_component	GO:0005794	Golgi apparatus
Q14703	cellular_component	GO:0000139	Golgi membrane
Q14703	biological_process	GO:0006508	proteolysis
Q14703	biological_process	GO:0006987	activation of signaling protein activity involved in unfolded protein response
Q14703	biological_process	GO:0030968	endoplasmic reticulum unfolded protein response
Q14703	biological_process	GO:0006629	lipid metabolic process
Q14849	molecular_function	GO:0015485	cholesterol binding
Q14849	cellular_component	GO:0005737	cytoplasm
Q14849	biological_process	GO:0008202	steroid metabolic process
Q14849	biological_process	GO:0008203	cholesterol metabolic process
Q14849	biological_process	GO:0006839	mitochondrial transport
Q14849	biological_process	GO:0006629	lipid metabolic process
Q15067	molecular_function	GO:0003997	acyl-CoA oxidase activity
Q15067	molecular_function	GO:0047485	protein N-terminus binding
Q15067	molecular_function	GO:0016401	palmitoyl-CoA oxidase activity
Q15067	molecular_function	GO:0005102	receptor binding
Q15067	molecular_function	GO:0071949	FAD binding
Q15067	cellular_component	GO:0005782	peroxisomal matrix
Q15067	cellular_component	GO:0005777	peroxisome
Q15067	biological_process	GO:0033559	unsaturated fatty acid metabolic process
Q15067	biological_process	GO:0019395	fatty acid oxidation
Q15067	biological_process	GO:0000038	very long-chain fatty acid metabolic process
Q15067	biological_process	GO:0033540	fatty acid beta-oxidation using acyl-CoA oxidase
Q15067	biological_process	GO:0006091	generation of precursor metabolites and energy
Q15067	biological_process	GO:0044281	small molecule metabolic process
Q15067	biological_process	GO:0036109	alpha-linolenic acid metabolic process
Q15067	biological_process	GO:0044255	cellular lipid metabolic process
Q15067	biological_process	GO:0006693	prostaglandin metabolic process
Q15067	biological_process	GO:2000189	positive regulation of cholesterol homeostasis
Q15067	biological_process	GO:0055088	lipid homeostasis
Q15067	biological_process	GO:0006629	lipid metabolic process
Q15067	biological_process	GO:0016559	peroxisome fission
Q15102	molecular_function	GO:0005515	protein binding
Q15102	biological_process	GO:0007399	nervous system development
Q15102	biological_process	GO:0006629	lipid metabolic process
Q53H76	molecular_function	GO:0008970	phosphatidylcholine 1-acylhydrolase activity
Q53H76	biological_process	GO:0006658	phosphatidylserine metabolic process
Q53H76	biological_process	GO:0006629	lipid metabolic process
Q6P1M0	molecular_function	GO:0015245	fatty acid transporter activity
Q6P1M0	molecular_function	GO:0004467	long-chain fatty acid-CoA ligase activity
Q6P1M0	cellular_component	GO:0005789	endoplasmic reticulum membrane
Q6P1M0	cellular_component	GO:0005886	plasma membrane
Q6P1M0	biological_process	GO:0015909	long-chain fatty acid transport
Q6P1M0	biological_process	GO:0006810	transport
Q6P1M0	biological_process	GO:0055085	transmembrane transport
Q6P1M0	biological_process	GO:0015908	fatty acid transport
Q6P1M0	biological_process	GO:0001676	long-chain fatty acid metabolic process
Q6P1M0	biological_process	GO:0044539	long-chain fatty acid import
Q6P1M0	biological_process	GO:0006629	lipid metabolic process
Q6UWR7	molecular_function	GO:0008081	phosphoric diester hydrolase activity
Q6UWR7	molecular_function	GO:0047390	glycerophosphocholine cholinephosphodiesterase activity
Q6UWR7	cellular_component	GO:0005576	extracellular region
Q6UWR7	cellular_component	GO:0005886	plasma membrane
Q6UWR7	biological_process	GO:0019695	choline metabolic process
Q6UWR7	biological_process	GO:0006629	lipid metabolic process
Q7KYR7	cellular_component	GO:0005887	integral to plasma membrane
Q7KYR7	biological_process	GO:0006629	lipid metabolic process
Q86W33	molecular_function	GO:0004930	G-protein coupled receptor activity
Q86W33	biological_process	GO:0007186	G-protein coupled receptor signaling pathway
Q86W33	biological_process	GO:0007568	aging
Q86W33	biological_process	GO:0006629	lipid metabolic process
Q8WTS1	molecular_function	GO:0004806	triglyceride lipase activity
Q8WTS1	molecular_function	GO:0042171	lysophosphatidic acid acyltransferase activity
Q8WTS1	cellular_component	GO:0005829	cytosol
Q8WTS1	cellular_component	GO:0005811	lipid particle
Q8WTS1	biological_process	GO:0019433	triglyceride catabolic process
Q8WTS1	biological_process	GO:0010891	negative regulation of sequestering of triglyceride
Q8WTS1	biological_process	GO:0010898	positive regulation of triglyceride catabolic process
Q8WTS1	biological_process	GO:0044281	small molecule metabolic process
Q8WTS1	biological_process	GO:0006654	phosphatidic acid biosynthetic process
Q8WTS1	biological_process	GO:0006629	lipid metabolic process
Q8WTV0	molecular_function	GO:0030169	low-density lipoprotein particle binding
Q8WTV0	molecular_function	GO:0005545	1-phosphatidylinositol binding
Q8WTV0	molecular_function	GO:0034185	apolipoprotein binding
Q8WTV0	molecular_function	GO:0001530	lipopolysaccharide binding
Q8WTV0	molecular_function	GO:0070506	high-density lipoprotein particle receptor activity
Q8WTV0	molecular_function	GO:0034186	apolipoprotein A-I binding
Q8WTV0	molecular_function	GO:0001786	phosphatidylserine binding
Q8WTV0	molecular_function	GO:0001875	lipopolysaccharide receptor activity
Q8WTV0	molecular_function	GO:0005215	transporter activity
Q8WTV0	cellular_component	GO:0005901	caveola
Q8WTV0	cellular_component	GO:0005886	plasma membrane
Q8WTV0	biological_process	GO:0051000	positive regulation of nitric-oxide synthase activity
Q8WTV0	biological_process	GO:0010867	positive regulation of triglyceride biosynthetic process
Q8WTV0	biological_process	GO:0010595	positive regulation of endothelial cell migration
Q8WTV0	biological_process	GO:0010899	regulation of phosphatidylcholine catabolic process
Q8WTV0	biological_process	GO:0033344	cholesterol efflux
Q8WTV0	biological_process	GO:0044281	small molecule metabolic process
Q8WTV0	biological_process	GO:0070328	triglyceride homeostasis
Q8WTV0	biological_process	GO:0010886	positive regulation of cholesterol storage
Q8WTV0	biological_process	GO:0015914	phospholipid transport
Q8WTV0	biological_process	GO:0070508	cholesterol import
Q8WTV0	biological_process	GO:0042632	cholesterol homeostasis
Q8WTV0	biological_process	GO:0031663	lipopolysaccharide-mediated signaling pathway
Q8WTV0	biological_process	GO:0042157	lipoprotein metabolic process
Q8WTV0	biological_process	GO:0034383	low-density lipoprotein particle clearance
Q8WTV0	biological_process	GO:0051856	adhesion to symbiont
Q8WTV0	biological_process	GO:0032497	detection of lipopolysaccharide
Q8WTV0	biological_process	GO:0042060	wound healing
Q8WTV0	biological_process	GO:0034384	high-density lipoprotein particle clearance
Q8WTV0	biological_process	GO:0043654	recognition of apoptotic cell
Q8WTV0	biological_process	GO:0034375	high-density lipoprotein particle remodeling
Q8WTV0	biological_process	GO:0015920	lipopolysaccharide transport
Q8WTV0	biological_process	GO:0050764	regulation of phagocytosis
Q8WTV0	biological_process	GO:0043691	reverse cholesterol transport
Q8WTV0	biological_process	GO:0006629	lipid metabolic process
Q8WUD6	molecular_function	GO:0019992	diacylglycerol binding
Q8WUD6	molecular_function	GO:0004142	diacylglycerol cholinephosphotransferase activity
Q8WUD6	cellular_component	GO:0043231	intracellular membrane-bounded organelle
Q8WUD6	cellular_component	GO:0016020	membrane
Q8WUD6	cellular_component	GO:0000139	Golgi membrane
Q8WUD6	biological_process	GO:0001558	regulation of cell growth
Q8WUD6	biological_process	GO:0006657	CDP-choline pathway
Q8WUD6	biological_process	GO:0006663	platelet activating factor biosynthetic process
Q8WUD6	biological_process	GO:0046474	glycerophospholipid biosynthetic process
Q8WUD6	biological_process	GO:0044281	small molecule metabolic process
Q8WUD6	biological_process	GO:0006644	phospholipid metabolic process
Q8WUD6	biological_process	GO:0006656	phosphatidylcholine biosynthetic process
Q8WUD6	biological_process	GO:0006629	lipid metabolic process
Q92539	molecular_function	GO:0003713	transcription coactivator activity
Q92539	molecular_function	GO:0008195	phosphatidate phosphatase activity
Q92539	cellular_component	GO:0005789	endoplasmic reticulum membrane
Q92539	biological_process	GO:0006646	phosphatidylethanolamine biosynthetic process
Q92539	biological_process	GO:0046474	glycerophospholipid biosynthetic process
Q92539	biological_process	GO:0044281	small molecule metabolic process
Q92539	biological_process	GO:0044255	cellular lipid metabolic process
Q92539	biological_process	GO:0006644	phospholipid metabolic process
Q92539	biological_process	GO:0045944	positive regulation of transcription from RNA polymerase II promoter
Q92539	biological_process	GO:0006656	phosphatidylcholine biosynthetic process
Q92539	biological_process	GO:0019432	triglyceride biosynthetic process
Q92539	biological_process	GO:0006629	lipid metabolic process
Q96E52	molecular_function	GO:0004222	metalloendopeptidase activity
Q96E52	cellular_component	GO:0031966	mitochondrial membrane
Q96E52	biological_process	GO:0006006	glucose metabolic process
Q96E52	biological_process	GO:0002024	diet induced thermogenesis
Q96E52	biological_process	GO:0010637	negative regulation of mitochondrial fusion
Q96E52	biological_process	GO:0006950	response to stress
Q96E52	biological_process	GO:0006515	misfolded or incompletely synthesized protein catabolic process
Q96E52	biological_process	GO:0097009	energy homeostasis
Q96E52	biological_process	GO:0006629	lipid metabolic process
Q99487	molecular_function	GO:0005543	phospholipid binding
Q99487	biological_process	GO:0006629	lipid metabolic process
Q99685	molecular_function	GO:0004622	lysophospholipase activity
Q99685	molecular_function	GO:0047372	acylglycerol lipase activity
Q99685	molecular_function	GO:0042803	protein homodimerization activity
Q99685	cellular_component	GO:0005789	endoplasmic reticulum membrane
Q99685	cellular_component	GO:0005886	plasma membrane
Q99685	biological_process	GO:2000124	regulation of endocannabinoid signaling pathway
Q99685	biological_process	GO:0019433	triglyceride catabolic process
Q99685	biological_process	GO:0036155	acylglycerol acyl-chain remodeling
Q99685	biological_process	GO:0019369	arachidonic acid metabolic process
Q99685	biological_process	GO:0007596	blood coagulation
Q99685	biological_process	GO:0030168	platelet activation
Q99685	biological_process	GO:0046474	glycerophospholipid biosynthetic process
Q99685	biological_process	GO:0044281	small molecule metabolic process
Q99685	biological_process	GO:0006954	inflammatory response
Q99685	biological_process	GO:0050727	regulation of inflammatory response
Q99685	biological_process	GO:0051930	regulation of sensory perception of pain
Q99685	biological_process	GO:0006644	phospholipid metabolic process
Q99685	biological_process	GO:0009966	regulation of signal transduction
Q99685	biological_process	GO:0046464	acylglycerol catabolic process
Q99685	biological_process	GO:0006629	lipid metabolic process
Q99714	molecular_function	GO:0008709	cholate 7-alpha-dehydrogenase activity
Q99714	molecular_function	GO:0005515	protein binding
Q99714	molecular_function	GO:0003857	3-hydroxyacyl-CoA dehydrogenase activity
Q99714	cellular_component	GO:0005759	mitochondrial matrix
Q99714	cellular_component	GO:0005739	mitochondrion
Q99714	cellular_component	GO:0005886	plasma membrane
Q99714	cellular_component	GO:0005737	cytoplasm
Q99714	biological_process	GO:0009083	branched-chain amino acid catabolic process
Q99714	biological_process	GO:0034641	cellular nitrogen compound metabolic process
Q99714	biological_process	GO:0044281	small molecule metabolic process
Q99714	biological_process	GO:0006629	lipid metabolic process
Q99829	molecular_function	GO:0005544	calcium-dependent phospholipid binding
Q99829	molecular_function	GO:0001786	phosphatidylserine binding
Q99829	molecular_function	GO:0005215	transporter activity
Q99829	cellular_component	GO:0005634	nucleus
Q99829	cellular_component	GO:0005730	nucleolus
Q99829	biological_process	GO:0016192	vesicle-mediated transport
Q99829	biological_process	GO:0006629	lipid metabolic process
Q9BPW4	cellular_component	GO:0005615	extracellular space
Q9BPW4	biological_process	GO:0006629	lipid metabolic process
Q9BQE5	molecular_function	GO:0008289	lipid binding
Q9BQE5	molecular_function	GO:0005102	receptor binding
Q9BQE5	molecular_function	GO:0008035	high-density lipoprotein particle binding
Q9BQE5	cellular_component	GO:0005789	endoplasmic reticulum membrane
Q9BQE5	biological_process	GO:0060135	maternal process involved in female pregnancy
Q9BQE5	biological_process	GO:0008203	cholesterol metabolic process
Q9BQE5	biological_process	GO:0007275	multicellular organismal development
Q9BQE5	biological_process	GO:0006869	lipid transport
Q9BQE5	biological_process	GO:0006953	acute-phase response
Q9BQE5	biological_process	GO:0006629	lipid metabolic process
Q9BWD1	molecular_function	GO:0003985	acetyl-CoA C-acetyltransferase activity
Q9BWD1	cellular_component	GO:0005634	nucleus
Q9BWD1	cellular_component	GO:0005730	nucleolus
Q9BWD1	cellular_component	GO:0005739	mitochondrion
Q9BWD1	cellular_component	GO:0005737	cytoplasm
Q9BWD1	biological_process	GO:0006629	lipid metabolic process
Q9BWW9	molecular_function	GO:0008035	high-density lipoprotein particle binding
Q9BWW9	biological_process	GO:0006629	lipid metabolic process
Q9BZC7	molecular_function	GO:0005524	ATP binding
Q9BZC7	molecular_function	GO:0000166	nucleotide binding
Q9BZC7	molecular_function	GO:0042626	ATPase activity, coupled to transmembrane movement of substances
Q9BZC7	molecular_function	GO:0016887	ATPase activity
Q9BZC7	cellular_component	GO:0005768	endosome
Q9BZC7	cellular_component	GO:0005765	lysosomal membrane
Q9BZC7	cellular_component	GO:0005815	microtubule organizing center
Q9BZC7	cellular_component	GO:0016021	integral to membrane
Q9BZC7	cellular_component	GO:0043190	ATP-binding cassette (ABC) transporter complex
Q9BZC7	cellular_component	GO:0016023	cytoplasmic membrane-bounded vesicle
Q9BZC7	cellular_component	GO:0005764	lysosome
Q9BZC7	biological_process	GO:0006810	transport
Q9BZC7	biological_process	GO:0042493	response to drug
Q9BZC7	biological_process	GO:0048545	response to steroid hormone stimulus
Q9BZC7	biological_process	GO:0006357	regulation of transcription from RNA polymerase II promoter
Q9BZC7	biological_process	GO:0032383	regulation of intracellular cholesterol transport
Q9BZC7	biological_process	GO:0006200	ATP catabolic process
Q9BZC7	biological_process	GO:0042632	cholesterol homeostasis
Q9BZC7	biological_process	GO:0006629	lipid metabolic process
Q9H221	molecular_function	GO:0005524	ATP binding
Q9H221	molecular_function	GO:0046982	protein heterodimerization activity
Q9H221	molecular_function	GO:0017127	cholesterol transporter activity
Q9H221	molecular_function	GO:0016887	ATPase activity
Q9H221	cellular_component	GO:0016324	apical plasma membrane
Q9H221	cellular_component	GO:0005886	plasma membrane
Q9H221	biological_process	GO:0015918	sterol transport
Q9H221	biological_process	GO:0055085	transmembrane transport
Q9H221	biological_process	GO:0007588	excretion
Q9H221	biological_process	GO:0033344	cholesterol efflux
Q9H221	biological_process	GO:0044281	small molecule metabolic process
Q9H221	biological_process	GO:0045796	negative regulation of intestinal cholesterol absorption
Q9H221	biological_process	GO:0030299	intestinal cholesterol absorption
Q9H221	biological_process	GO:0006200	ATP catabolic process
Q9H221	biological_process	GO:0042632	cholesterol homeostasis
Q9H221	biological_process	GO:0010949	negative regulation of intestinal phytosterol absorption
Q9H221	biological_process	GO:0006629	lipid metabolic process
Q9H222	molecular_function	GO:0005524	ATP binding
Q9H222	molecular_function	GO:0005515	protein binding
Q9H222	molecular_function	GO:0046982	protein heterodimerization activity
Q9H222	molecular_function	GO:0017127	cholesterol transporter activity
Q9H222	molecular_function	GO:0016887	ATPase activity
Q9H222	cellular_component	GO:0016324	apical plasma membrane
Q9H222	cellular_component	GO:0005886	plasma membrane
Q9H222	biological_process	GO:0015918	sterol transport
Q9H222	biological_process	GO:0055085	transmembrane transport
Q9H222	biological_process	GO:0007588	excretion
Q9H222	biological_process	GO:0033344	cholesterol efflux
Q9H222	biological_process	GO:0044281	small molecule metabolic process
Q9H222	biological_process	GO:0045796	negative regulation of intestinal cholesterol absorption
Q9H222	biological_process	GO:0030299	intestinal cholesterol absorption
Q9H222	biological_process	GO:0006200	ATP catabolic process
Q9H222	biological_process	GO:0042632	cholesterol homeostasis
Q9H222	biological_process	GO:0010949	negative regulation of intestinal phytosterol absorption
Q9H222	biological_process	GO:0006629	lipid metabolic process
Q9NZC3	molecular_function	GO:0008889	glycerophosphodiester phosphodiesterase activity
Q9NZC3	cellular_component	GO:0016021	integral to membrane
Q9NZC3	biological_process	GO:0006629	lipid metabolic process
Q9UBL6	molecular_function	GO:0005215	transporter activity
Q9UBL6	biological_process	GO:0006810	transport
Q9UBL6	biological_process	GO:0006629	lipid metabolic process
Q9UHC9	molecular_function	GO:0005515	protein binding
Q9UHC9	molecular_function	GO:0031489	myosin V binding
Q9UHC9	molecular_function	GO:0017137	Rab GTPase binding
Q9UHC9	cellular_component	GO:0016021	integral to membrane
Q9UHC9	cellular_component	GO:0005886	plasma membrane
Q9UHC9	biological_process	GO:0015918	sterol transport
Q9UHC9	biological_process	GO:0030299	intestinal cholesterol absorption
Q9UHC9	biological_process	GO:0006695	cholesterol biosynthetic process
Q9UHC9	biological_process	GO:0042157	lipoprotein metabolic process
Q9UHC9	biological_process	GO:0030301	cholesterol transport
Q9UHC9	biological_process	GO:0044281	small molecule metabolic process
Q9UHC9	biological_process	GO:0006629	lipid metabolic process
Q9UKU7	molecular_function	GO:0003995	acyl-CoA dehydrogenase activity
Q9UKU7	cellular_component	GO:0005759	mitochondrial matrix
Q9UKU7	biological_process	GO:0009083	branched-chain amino acid catabolic process
Q9UKU7	biological_process	GO:0034641	cellular nitrogen compound metabolic process
Q9UKU7	biological_process	GO:0044281	small molecule metabolic process
Q9UKU7	biological_process	GO:0006629	lipid metabolic process
Q9Y5X9	molecular_function	GO:0004620	phospholipase activity
Q9Y5X9	molecular_function	GO:0008970	phosphatidylcholine 1-acylhydrolase activity
Q9Y5X9	cellular_component	GO:0005615	extracellular space
Q9Y5X9	biological_process	GO:0055091	phospholipid homeostasis
Q9Y5X9	biological_process	GO:0009395	phospholipid catabolic process
Q9Y5X9	biological_process	GO:0032376	positive regulation of cholesterol transport
Q9Y5X9	biological_process	GO:0010983	positive regulation of high-density lipoprotein particle clearance
Q9Y5X9	biological_process	GO:0034375	high-density lipoprotein particle remodeling
Q9Y5X9	biological_process	GO:0042632	cholesterol homeostasis
Q9Y5X9	biological_process	GO:0043691	reverse cholesterol transport
Q9Y5X9	biological_process	GO:0006629	lipid metabolic process
Q9Y6K0	molecular_function	GO:0004142	diacylglycerol cholinephosphotransferase activity
Q9Y6K0	cellular_component	GO:0005789	endoplasmic reticulum membrane
Q9Y6K0	biological_process	GO:0006646	phosphatidylethanolamine biosynthetic process
Q9Y6K0	biological_process	GO:0006657	CDP-choline pathway
Q9Y6K0	biological_process	GO:0006644	phospholipid metabolic process
Q9Y6K0	biological_process	GO:0006656	phosphatidylcholine biosynthetic process
Q9Y6K0	biological_process	GO:0046474	glycerophospholipid biosynthetic process
Q9Y6K0	biological_process	GO:0044281	small molecule metabolic process
Q9Y6K0	biological_process	GO:0006629	lipid metabolic process
F1SQX9	molecular_function	GO:0015485	cholesterol binding
F1SQX9	cellular_component	GO:0030425	dendrite
F1SQX9	cellular_component	GO:0005783	endoplasmic reticulum
F1SQX9	cellular_component	GO:0005615	extracellular space
F1SQX9	cellular_component	GO:0043025	neuronal cell body
F1SQX9	cellular_component	GO:0048471	perinuclear region of cytoplasm
F1SQX9	cellular_component	GO:0022626	cytosolic ribosome
F1SQX9	biological_process	GO:2000405	negative regulation of T cell migration
F1SQX9	biological_process	GO:0042246	tissue regeneration
F1SQX9	biological_process	GO:0007420	brain development
F1SQX9	biological_process	GO:0000302	response to reactive oxygen species
F1SQX9	biological_process	GO:0010642	negative regulation of platelet-derived growth factor receptor signaling pathway
F1SQX9	biological_process	GO:0042308	negative regulation of protein import into nucleus
F1SQX9	biological_process	GO:0006006	glucose metabolic process
F1SQX9	biological_process	GO:0048662	negative regulation of smooth muscle cell proliferation
F1SQX9	biological_process	GO:0042493	response to drug
F1SQX9	biological_process	GO:0048678	response to axon injury
F1SQX9	biological_process	GO:0071638	negative regulation of monocyte chemotactic protein-1 production
F1SQX9	biological_process	GO:1900016	negative regulation of cytokine production involved in inflammatory response
F1SQX9	biological_process	GO:0051895	negative regulation of focal adhesion assembly
F1SQX9	biological_process	GO:0007568	aging
F1SQX9	biological_process	GO:2000098	negative regulation of smooth muscle cell-matrix adhesion
F1SQX9	biological_process	GO:0014012	peripheral nervous system axon regeneration
F1SQX9	biological_process	GO:0060588	negative regulation of lipoprotein lipid oxidation
F1SQX9	biological_process	GO:0006629	lipid metabolic process
E3VX35	molecular_function	GO:0015485	cholesterol binding
E3VX35	cellular_component	GO:0030425	dendrite
E3VX35	cellular_component	GO:0005783	endoplasmic reticulum
E3VX35	cellular_component	GO:0005615	extracellular space
E3VX35	cellular_component	GO:0048471	perinuclear region of cytoplasm
E3VX35	cellular_component	GO:0043025	neuronal cell body
E3VX35	cellular_component	GO:0022626	cytosolic ribosome
E3VX35	biological_process	GO:2000405	negative regulation of T cell migration
E3VX35	biological_process	GO:0042246	tissue regeneration
E3VX35	biological_process	GO:0007420	brain development
E3VX35	biological_process	GO:0000302	response to reactive oxygen species
E3VX35	biological_process	GO:0010642	negative regulation of platelet-derived growth factor receptor signaling pathway
E3VX35	biological_process	GO:0042308	negative regulation of protein import into nucleus
E3VX35	biological_process	GO:0006006	glucose metabolic process
E3VX35	biological_process	GO:0048662	negative regulation of smooth muscle cell proliferation
E3VX35	biological_process	GO:0042493	response to drug
E3VX35	biological_process	GO:0048678	response to axon injury
E3VX35	biological_process	GO:0071638	negative regulation of monocyte chemotactic protein-1 production
E3VX35	biological_process	GO:1900016	negative regulation of cytokine production involved in inflammatory response
E3VX35	biological_process	GO:0051895	negative regulation of focal adhesion assembly
E3VX35	biological_process	GO:0007568	aging
E3VX35	biological_process	GO:2000098	negative regulation of smooth muscle cell-matrix adhesion
E3VX35	biological_process	GO:0014012	peripheral nervous system axon regeneration
E3VX35	biological_process	GO:0060588	negative regulation of lipoprotein lipid oxidation
E3VX35	biological_process	GO:0006629	lipid metabolic process
E3VX36	molecular_function	GO:0015485	cholesterol binding
E3VX36	cellular_component	GO:0030425	dendrite
E3VX36	cellular_component	GO:0005783	endoplasmic reticulum
E3VX36	cellular_component	GO:0005615	extracellular space
E3VX36	cellular_component	GO:0048471	perinuclear region of cytoplasm
E3VX36	cellular_component	GO:0043025	neuronal cell body
E3VX36	cellular_component	GO:0022626	cytosolic ribosome
E3VX36	biological_process	GO:2000405	negative regulation of T cell migration
E3VX36	biological_process	GO:0042246	tissue regeneration
E3VX36	biological_process	GO:0007420	brain development
E3VX36	biological_process	GO:0000302	response to reactive oxygen species
E3VX36	biological_process	GO:0010642	negative regulation of platelet-derived growth factor receptor signaling pathway
E3VX36	biological_process	GO:0042308	negative regulation of protein import into nucleus
E3VX36	biological_process	GO:0006006	glucose metabolic process
E3VX36	biological_process	GO:0048662	negative regulation of smooth muscle cell proliferation
E3VX36	biological_process	GO:0042493	response to drug
E3VX36	biological_process	GO:0048678	response to axon injury
E3VX36	biological_process	GO:0071638	negative regulation of monocyte chemotactic protein-1 production
E3VX36	biological_process	GO:1900016	negative regulation of cytokine production involved in inflammatory response
E3VX36	biological_process	GO:0051895	negative regulation of focal adhesion assembly
E3VX36	biological_process	GO:0007568	aging
E3VX36	biological_process	GO:2000098	negative regulation of smooth muscle cell-matrix adhesion
E3VX36	biological_process	GO:0014012	peripheral nervous system axon regeneration
E3VX36	biological_process	GO:0060588	negative regulation of lipoprotein lipid oxidation
E3VX36	biological_process	GO:0006629	lipid metabolic process
F6XM13	molecular_function	GO:0015485	cholesterol binding
F6XM13	cellular_component	GO:0030425	dendrite
F6XM13	cellular_component	GO:0005783	endoplasmic reticulum
F6XM13	cellular_component	GO:0005615	extracellular space
F6XM13	cellular_component	GO:0048471	perinuclear region of cytoplasm
F6XM13	cellular_component	GO:0043025	neuronal cell body
F6XM13	cellular_component	GO:0022626	cytosolic ribosome
F6XM13	biological_process	GO:2000405	negative regulation of T cell migration
F6XM13	biological_process	GO:0042246	tissue regeneration
F6XM13	biological_process	GO:0007420	brain development
F6XM13	biological_process	GO:0000302	response to reactive oxygen species
F6XM13	biological_process	GO:0010642	negative regulation of platelet-derived growth factor receptor signaling pathway
F6XM13	biological_process	GO:0042308	negative regulation of protein import into nucleus
F6XM13	biological_process	GO:0006006	glucose metabolic process
F6XM13	biological_process	GO:0048662	negative regulation of smooth muscle cell proliferation
F6XM13	biological_process	GO:0042493	response to drug
F6XM13	biological_process	GO:0048678	response to axon injury
F6XM13	biological_process	GO:0071638	negative regulation of monocyte chemotactic protein-1 production
F6XM13	biological_process	GO:1900016	negative regulation of cytokine production involved in inflammatory response
F6XM13	biological_process	GO:0051895	negative regulation of focal adhesion assembly
F6XM13	biological_process	GO:0007568	aging
F6XM13	biological_process	GO:2000098	negative regulation of smooth muscle cell-matrix adhesion
F6XM13	biological_process	GO:0014012	peripheral nervous system axon regeneration
F6XM13	biological_process	GO:0060588	negative regulation of lipoprotein lipid oxidation
F6XM13	biological_process	GO:0006629	lipid metabolic process
F7BHM9	molecular_function	GO:0015485	cholesterol binding
F7BHM9	cellular_component	GO:0030425	dendrite
F7BHM9	cellular_component	GO:0005783	endoplasmic reticulum
F7BHM9	cellular_component	GO:0005615	extracellular space
F7BHM9	cellular_component	GO:0048471	perinuclear region of cytoplasm
F7BHM9	cellular_component	GO:0043025	neuronal cell body
F7BHM9	cellular_component	GO:0022626	cytosolic ribosome
F7BHM9	biological_process	GO:2000405	negative regulation of T cell migration
F7BHM9	biological_process	GO:0042246	tissue regeneration
F7BHM9	biological_process	GO:0007420	brain development
F7BHM9	biological_process	GO:0000302	response to reactive oxygen species
F7BHM9	biological_process	GO:0010642	negative regulation of platelet-derived growth factor receptor signaling pathway
F7BHM9	biological_process	GO:0042308	negative regulation of protein import into nucleus
F7BHM9	biological_process	GO:0006006	glucose metabolic process
F7BHM9	biological_process	GO:0048662	negative regulation of smooth muscle cell proliferation
F7BHM9	biological_process	GO:0042493	response to drug
F7BHM9	biological_process	GO:0048678	response to axon injury
F7BHM9	biological_process	GO:0071638	negative regulation of monocyte chemotactic protein-1 production
F7BHM9	biological_process	GO:1900016	negative regulation of cytokine production involved in inflammatory response
F7BHM9	biological_process	GO:0051895	negative regulation of focal adhesion assembly
F7BHM9	biological_process	GO:0007568	aging
F7BHM9	biological_process	GO:2000098	negative regulation of smooth muscle cell-matrix adhesion
F7BHM9	biological_process	GO:0014012	peripheral nervous system axon regeneration
F7BHM9	biological_process	GO:0060588	negative regulation of lipoprotein lipid oxidation
F7BHM9	biological_process	GO:0006629	lipid metabolic process
F7FST1	molecular_function	GO:0015485	cholesterol binding
F7FST1	cellular_component	GO:0030425	dendrite
F7FST1	cellular_component	GO:0005783	endoplasmic reticulum
F7FST1	cellular_component	GO:0005615	extracellular space
F7FST1	cellular_component	GO:0048471	perinuclear region of cytoplasm
F7FST1	cellular_component	GO:0043025	neuronal cell body
F7FST1	cellular_component	GO:0022626	cytosolic ribosome
F7FST1	biological_process	GO:2000405	negative regulation of T cell migration
F7FST1	biological_process	GO:0042246	tissue regeneration
F7FST1	biological_process	GO:0007420	brain development
F7FST1	biological_process	GO:0000302	response to reactive oxygen species
F7FST1	biological_process	GO:0010642	negative regulation of platelet-derived growth factor receptor signaling pathway
F7FST1	biological_process	GO:0042308	negative regulation of protein import into nucleus
F7FST1	biological_process	GO:0006006	glucose metabolic process
F7FST1	biological_process	GO:0048662	negative regulation of smooth muscle cell proliferation
F7FST1	biological_process	GO:0042493	response to drug
F7FST1	biological_process	GO:0048678	response to axon injury
F7FST1	biological_process	GO:0071638	negative regulation of monocyte chemotactic protein-1 production
F7FST1	biological_process	GO:1900016	negative regulation of cytokine production involved in inflammatory response
F7FST1	biological_process	GO:0051895	negative regulation of focal adhesion assembly
F7FST1	biological_process	GO:0007568	aging
F7FST1	biological_process	GO:2000098	negative regulation of smooth muscle cell-matrix adhesion
F7FST1	biological_process	GO:0014012	peripheral nervous system axon regeneration
F7FST1	biological_process	GO:0060588	negative regulation of lipoprotein lipid oxidation
F7FST1	biological_process	GO:0006629	lipid metabolic process
G1LS67	molecular_function	GO:0015485	cholesterol binding
G1LS67	cellular_component	GO:0030425	dendrite
G1LS67	cellular_component	GO:0005783	endoplasmic reticulum
G1LS67	cellular_component	GO:0005615	extracellular space
G1LS67	cellular_component	GO:0048471	perinuclear region of cytoplasm
G1LS67	cellular_component	GO:0043025	neuronal cell body
G1LS67	cellular_component	GO:0022626	cytosolic ribosome
G1LS67	biological_process	GO:2000405	negative regulation of T cell migration
G1LS67	biological_process	GO:0042246	tissue regeneration
G1LS67	biological_process	GO:0007420	brain development
G1LS67	biological_process	GO:0000302	response to reactive oxygen species
G1LS67	biological_process	GO:0010642	negative regulation of platelet-derived growth factor receptor signaling pathway
G1LS67	biological_process	GO:0042308	negative regulation of protein import into nucleus
G1LS67	biological_process	GO:0006006	glucose metabolic process
G1LS67	biological_process	GO:0048662	negative regulation of smooth muscle cell proliferation
G1LS67	biological_process	GO:0042493	response to drug
G1LS67	biological_process	GO:0048678	response to axon injury
G1LS67	biological_process	GO:0071638	negative regulation of monocyte chemotactic protein-1 production
[truncated: 289 more rows]

## Sheet: b) CellMot_data
GeneID	Namespace	GO_ID	GO_Name
P62998	molecular_function	GO:0005525	GTP binding
P62998	biological_process	GO:0030334	regulation of cell migration
P62998	biological_process	GO:0048870	cell motility
P62999	molecular_function	GO:0005525	GTP binding
P62999	biological_process	GO:0030334	regulation of cell migration
P62999	biological_process	GO:0048870	cell motility
O60687	molecular_function	GO:0005515	protein binding
O60687	molecular_function	GO:0005102	receptor binding
O60687	cellular_component	GO:0015630	microtubule cytoskeleton
O60687	cellular_component	GO:0005737	cytoplasm
O60687	biological_process	GO:0042325	regulation of phosphorylation
O60687	biological_process	GO:0016337	cell-cell adhesion
O60687	biological_process	GO:0048870	cell motility
O60687	biological_process	GO:0090050	positive regulation of cell migration involved in sprouting angiogenesis
P12755	molecular_function	GO:0003714	transcription corepressor activity
P12755	molecular_function	GO:0070491	repressing transcription factor binding
P12755	molecular_function	GO:0031625	ubiquitin protein ligase binding
P12755	molecular_function	GO:0046811	histone deacetylase inhibitor activity
P12755	molecular_function	GO:0019901	protein kinase binding
P12755	molecular_function	GO:0005515	protein binding
P12755	molecular_function	GO:0019904	protein domain specific binding
P12755	molecular_function	GO:0008270	zinc ion binding
P12755	molecular_function	GO:0046332	SMAD binding
P12755	cellular_component	GO:0017053	transcriptional repressor complex
P12755	cellular_component	GO:0016605	PML body
P12755	cellular_component	GO:0005654	nucleoplasm
P12755	cellular_component	GO:0005634	nucleus
P12755	cellular_component	GO:0016604	nuclear body
P12755	cellular_component	GO:0005667	transcription factor complex
P12755	cellular_component	GO:0005737	cytoplasm
P12755	cellular_component	GO:0044428	nuclear part
P12755	biological_process	GO:0043010	camera-type eye development
P12755	biological_process	GO:0014902	myotube differentiation
P12755	biological_process	GO:0002089	lens morphogenesis in camera-type eye
P12755	biological_process	GO:0035019	somatic stem cell maintenance
P12755	biological_process	GO:0021772	olfactory bulb development
P12755	biological_process	GO:0045668	negative regulation of osteoblast differentiation
P12755	biological_process	GO:0022011	myelination in peripheral nervous system
P12755	biological_process	GO:0010626	negative regulation of Schwann cell proliferation
P12755	biological_process	GO:0008285	negative regulation of cell proliferation
P12755	biological_process	GO:0060349	bone morphogenesis
P12755	biological_process	GO:0030509	BMP signaling pathway
P12755	biological_process	GO:0048147	negative regulation of fibroblast proliferation
P12755	biological_process	GO:0043585	nose morphogenesis
P12755	biological_process	GO:0045944	positive regulation of transcription from RNA polymerase II promoter
P12755	biological_process	GO:0032926	negative regulation of activin receptor signaling pathway
P12755	biological_process	GO:0001843	neural tube closure
P12755	biological_process	GO:0006367	transcription initiation from RNA polymerase II promoter
P12755	biological_process	GO:0060041	retina development in camera-type eye
P12755	biological_process	GO:0030514	negative regulation of BMP signaling pathway
P12755	biological_process	GO:0007179	transforming growth factor beta receptor signaling pathway
P12755	biological_process	GO:0000122	negative regulation of transcription from RNA polymerase II promoter
P12755	biological_process	GO:0048593	camera-type eye morphogenesis
P12755	biological_process	GO:0008283	cell proliferation
P12755	biological_process	GO:0030512	negative regulation of transforming growth factor beta receptor signaling pathway
P12755	biological_process	GO:0048870	cell motility
P12755	biological_process	GO:0060021	palate development
P12755	biological_process	GO:0070207	protein homotrimerization
P12755	biological_process	GO:0043388	positive regulation of DNA binding
P12755	biological_process	GO:0006351	transcription, DNA-dependent
P12755	biological_process	GO:0030326	embryonic limb morphogenesis
P12755	biological_process	GO:0048741	skeletal muscle fiber development
P12755	biological_process	GO:0060395	SMAD protein signal transduction
P12755	biological_process	GO:0030177	positive regulation of Wnt receptor signaling pathway
P12755	biological_process	GO:0010467	gene expression
P12755	biological_process	GO:0009948	anterior/posterior axis specification
P12755	biological_process	GO:0060325	face morphogenesis
P12755	biological_process	GO:0042981	regulation of apoptotic process
P14921	molecular_function	GO:0003677	DNA binding
P14921	molecular_function	GO:0005515	protein binding
P14921	molecular_function	GO:0008134	transcription factor binding
P14921	molecular_function	GO:0003700	sequence-specific DNA binding transcription factor activity
P14921	cellular_component	GO:0005634	nucleus
P14921	biological_process	GO:0030578	PML body organization
P14921	biological_process	GO:0045786	negative regulation of cell cycle
P14921	biological_process	GO:0045893	positive regulation of transcription, DNA-dependent
P14921	biological_process	GO:0006366	transcription from RNA polymerase II promoter
P14921	biological_process	GO:0046677	response to antibiotic
P14921	biological_process	GO:0051272	positive regulation of cellular component movement
P14921	biological_process	GO:0048870	cell motility
P14921	biological_process	GO:0045944	positive regulation of transcription from RNA polymerase II promoter
P14921	biological_process	GO:0045648	positive regulation of erythrocyte differentiation
P14921	biological_process	GO:0006955	immune response
P14921	biological_process	GO:0006917	induction of apoptosis
P14921	biological_process	GO:0008285	negative regulation of cell proliferation
P16144	molecular_function	GO:0005515	protein binding
P16144	cellular_component	GO:0031252	cell leading edge
P16144	cellular_component	GO:0009986	cell surface
P16144	cellular_component	GO:0030056	hemidesmosome
P16144	cellular_component	GO:0005886	plasma membrane
P16144	biological_process	GO:0009611	response to wounding
P16144	biological_process	GO:0034329	cell junction assembly
P16144	biological_process	GO:0007155	cell adhesion
P16144	biological_process	GO:0048870	cell motility
P16144	biological_process	GO:0031581	hemidesmosome assembly
P17813	molecular_function	GO:0048185	activin binding
P17813	molecular_function	GO:0005114	type II transforming growth factor beta receptor binding
P17813	molecular_function	GO:0005024	transforming growth factor beta-activated receptor activity
P17813	molecular_function	GO:0042803	protein homodimerization activity
P17813	molecular_function	GO:0005534	galactose binding
P17813	molecular_function	GO:0005515	protein binding
P17813	molecular_function	GO:0004888	transmembrane signaling receptor activity
P17813	molecular_function	GO:0005072	transforming growth factor beta receptor, cytoplasmic mediator activity
P17813	molecular_function	GO:0005539	glycosaminoglycan binding
P17813	molecular_function	GO:0050431	transforming growth factor beta binding
P17813	molecular_function	GO:0034713	type I transforming growth factor beta receptor binding
P17813	cellular_component	GO:0009986	cell surface
P17813	cellular_component	GO:0005634	nucleus
P17813	cellular_component	GO:0005615	extracellular space
P17813	cellular_component	GO:0070022	transforming growth factor beta receptor homodimeric complex
P17813	cellular_component	GO:0009897	external side of plasma membrane
P17813	cellular_component	GO:0005730	nucleolus
P17813	cellular_component	GO:0005737	cytoplasm
P17813	biological_process	GO:0016477	cell migration
P17813	biological_process	GO:0042127	regulation of cell proliferation
P17813	biological_process	GO:0030513	positive regulation of BMP signaling pathway
P17813	biological_process	GO:0022009	central nervous system vasculogenesis
P17813	biological_process	GO:0017015	regulation of transforming growth factor beta receptor signaling pathway
P17813	biological_process	GO:0060326	cell chemotaxis
P17813	biological_process	GO:0070483	detection of hypoxia
P17813	biological_process	GO:0001570	vasculogenesis
P17813	biological_process	GO:0001937	negative regulation of endothelial cell proliferation
P17813	biological_process	GO:0030509	BMP signaling pathway
P17813	biological_process	GO:0051001	negative regulation of nitric-oxide synthase activity
P17813	biological_process	GO:0001666	response to hypoxia
P17813	biological_process	GO:0022617	extracellular matrix disassembly
P17813	biological_process	GO:0045944	positive regulation of transcription from RNA polymerase II promoter
P17813	biological_process	GO:0060394	negative regulation of pathway-restricted SMAD protein phosphorylation
P17813	biological_process	GO:0048845	venous blood vessel morphogenesis
P17813	biological_process	GO:0001569	patterning of blood vessels
P17813	biological_process	GO:0001300	chronological cell aging
P17813	biological_process	GO:0042325	regulation of phosphorylation
P17813	biological_process	GO:0006355	regulation of transcription, DNA-dependent
P17813	biological_process	GO:0048745	smooth muscle tissue development
P17813	biological_process	GO:0000122	negative regulation of transcription from RNA polymerase II promoter
P17813	biological_process	GO:0007179	transforming growth factor beta receptor signaling pathway
P17813	biological_process	GO:0010862	positive regulation of pathway-restricted SMAD protein phosphorylation
P17813	biological_process	GO:0030512	negative regulation of transforming growth factor beta receptor signaling pathway
P17813	biological_process	GO:0048870	cell motility
P17813	biological_process	GO:0001934	positive regulation of protein phosphorylation
P17813	biological_process	GO:0030155	regulation of cell adhesion
P17813	biological_process	GO:0042060	wound healing
P17813	biological_process	GO:0030336	negative regulation of cell migration
P17813	biological_process	GO:0031953	negative regulation of protein autophosphorylation
P17813	biological_process	GO:0003084	positive regulation of systemic arterial blood pressure
P17813	biological_process	GO:0001947	heart looping
P17813	biological_process	GO:0048844	artery morphogenesis
P28906	molecular_function	GO:0030246	carbohydrate binding
P28906	molecular_function	GO:0008134	transcription factor binding
P28906	cellular_component	GO:0016324	apical plasma membrane
P28906	cellular_component	GO:0009897	external side of plasma membrane
P28906	cellular_component	GO:0005764	lysosome
P28906	cellular_component	GO:0005737	cytoplasm
P28906	cellular_component	GO:0048471	perinuclear region of cytoplasm
P28906	cellular_component	GO:0009925	basal plasma membrane
P28906	cellular_component	GO:0045171	intercellular bridge
P28906	cellular_component	GO:0005887	integral to plasma membrane
P28906	cellular_component	GO:0036053	glomerular endothelium fenestra
P28906	cellular_component	GO:0005886	plasma membrane
P28906	biological_process	GO:0008217	regulation of blood pressure
P28906	biological_process	GO:0061042	vascular wound healing
P28906	biological_process	GO:0071971	extracellular vesicular exosome assembly
P28906	biological_process	GO:1900041	negative regulation of interleukin-2 secretion
P28906	biological_process	GO:0038001	paracrine signaling
P28906	biological_process	GO:0072011	glomerular endothelium development
P28906	biological_process	GO:0045766	positive regulation of angiogenesis
P28906	biological_process	GO:0072089	stem cell proliferation
P28906	biological_process	GO:0035759	mesangial cell-matrix adhesion
P28906	biological_process	GO:0001935	endothelial cell proliferation
P28906	biological_process	GO:1900035	negative regulation of cellular response to heat
P28906	biological_process	GO:0042482	positive regulation of odontogenesis
P28906	biological_process	GO:0007165	signal transduction
P28906	biological_process	GO:0016337	cell-cell adhesion
P28906	biological_process	GO:0045019	negative regulation of nitric oxide biosynthetic process
P28906	biological_process	GO:0010628	positive regulation of gene expression
P28906	biological_process	GO:0060290	transdifferentiation
P28906	biological_process	GO:0006536	glutamate metabolic process
P28906	biological_process	GO:0072254	metanephric glomerular mesangial cell differentiation
P28906	biological_process	GO:0032733	positive regulation of interleukin-10 production
P28906	biological_process	GO:0003094	glomerular filtration
P28906	biological_process	GO:0010629	negative regulation of gene expression
P28906	biological_process	GO:0032720	negative regulation of tumor necrosis factor production
P28906	biological_process	GO:1900168	positive regulation of glial cell line-derived neurotrophic factor secretion
P28906	biological_process	GO:0060547	negative regulation of necrotic cell death
P28906	biological_process	GO:0071425	hematopoietic stem cell proliferation
P28906	biological_process	GO:0008283	cell proliferation
P28906	biological_process	GO:0048870	cell motility
P28906	biological_process	GO:0071657	positive regulation of granulocyte colony-stimulating factor production
P28906	biological_process	GO:0003158	endothelium development
P28906	biological_process	GO:0030097	hemopoiesis
P28906	biological_process	GO:1900038	negative regulation of cellular response to hypoxia
P28906	biological_process	GO:0050776	regulation of immune response
P28906	biological_process	GO:0030195	negative regulation of blood coagulation
P28906	biological_process	GO:0050900	leukocyte migration
P28906	biological_process	GO:2001214	positive regulation of vasculogenesis
P28906	biological_process	GO:0001894	tissue homeostasis
P28906	biological_process	GO:0071636	positive regulation of transforming growth factor beta production
P36897	molecular_function	GO:0005025	transforming growth factor beta receptor activity, type I
P36897	molecular_function	GO:0005524	ATP binding
P36897	molecular_function	GO:0005114	type II transforming growth factor beta receptor binding
P36897	molecular_function	GO:0005024	transforming growth factor beta-activated receptor activity
P36897	molecular_function	GO:0019838	growth factor binding
P36897	molecular_function	GO:0004674	protein serine/threonine kinase activity
P36897	molecular_function	GO:0005515	protein binding
P36897	molecular_function	GO:0004672	protein kinase activity
P36897	molecular_function	GO:0070411	I-SMAD binding
P36897	molecular_function	GO:0046332	SMAD binding
P36897	molecular_function	GO:0004675	transmembrane receptor protein serine/threonine kinase activity
P36897	molecular_function	GO:0050431	transforming growth factor beta binding
P36897	cellular_component	GO:0070022	transforming growth factor beta receptor homodimeric complex
P36897	cellular_component	GO:0044459	plasma membrane part
P36897	cellular_component	GO:0005923	tight junction
P36897	cellular_component	GO:0005886	plasma membrane
P36897	cellular_component	GO:0043235	receptor complex
P36897	biological_process	GO:0030199	collagen fibril organization
P36897	biological_process	GO:0008354	germ cell migration
P36897	biological_process	GO:0071560	cellular response to transforming growth factor beta stimulus
P36897	biological_process	GO:0001837	epithelial to mesenchymal transition
P36897	biological_process	GO:0000186	activation of MAPKK activity
P36897	biological_process	GO:0031396	regulation of protein ubiquitination
P36897	biological_process	GO:0007165	signal transduction
P36897	biological_process	GO:0060017	parathyroid gland development
P36897	biological_process	GO:0007507	heart development
P36897	biological_process	GO:0060037	pharyngeal system development
P36897	biological_process	GO:0006468	protein phosphorylation
P36897	biological_process	GO:0043066	negative regulation of apoptotic process
P36897	biological_process	GO:0043062	extracellular structure organization
P36897	biological_process	GO:0018107	peptidyl-threonine phosphorylation
P36897	biological_process	GO:0018105	peptidyl-serine phosphorylation
P36897	biological_process	GO:0048663	neuron fate commitment
P36897	biological_process	GO:0009952	anterior/posterior pattern specification
P36897	biological_process	GO:0051897	positive regulation of protein kinase B signaling cascade
P36897	biological_process	GO:0001822	kidney development
P36897	biological_process	GO:0006355	regulation of transcription, DNA-dependent
P36897	biological_process	GO:0030307	positive regulation of cell growth
P36897	biological_process	GO:0007050	cell cycle arrest
P36897	biological_process	GO:0045893	positive regulation of transcription, DNA-dependent
P36897	biological_process	GO:0007179	transforming growth factor beta receptor signaling pathway
P36897	biological_process	GO:0010862	positive regulation of pathway-restricted SMAD protein phosphorylation
P36897	biological_process	GO:0051272	positive regulation of cellular component movement
P36897	biological_process	GO:0048870	cell motility
P36897	biological_process	GO:0030512	negative regulation of transforming growth factor beta receptor signaling pathway
P36897	biological_process	GO:0060021	palate development
P36897	biological_process	GO:0048705	skeletal system morphogenesis
P36897	biological_process	GO:0070723	response to cholesterol
P36897	biological_process	GO:0060391	positive regulation of SMAD protein import into nucleus
P36897	biological_process	GO:0048538	thymus development
P36897	biological_process	GO:0042060	wound healing
P36897	biological_process	GO:0001701	in utero embryonic development
P36897	biological_process	GO:0032331	negative regulation of chondrocyte differentiation
P36897	biological_process	GO:0048701	embryonic cranial skeleton morphogenesis
P36897	biological_process	GO:0048844	artery morphogenesis
P36897	biological_process	GO:0060389	pathway-restricted SMAD protein phosphorylation
P36897	biological_process	GO:0001501	skeletal system development
P36897	biological_process	GO:0042981	regulation of apoptotic process
P36897	biological_process	GO:0008284	positive regulation of cell proliferation
P36897	biological_process	GO:0048762	mesenchymal cell differentiation
P63000	molecular_function	GO:0005515	protein binding
P63000	molecular_function	GO:0031996	thioesterase binding
P63000	molecular_function	GO:0005525	GTP binding
P63000	molecular_function	GO:0019899	enzyme binding
P63000	molecular_function	GO:0003924	GTPase activity
P63000	cellular_component	GO:0005829	cytosol
P63000	cellular_component	GO:0005886	plasma membrane
P63000	biological_process	GO:0030032	lamellipodium assembly
P63000	biological_process	GO:0007596	blood coagulation
P63000	biological_process	GO:0048011	nerve growth factor receptor signaling pathway
P63000	biological_process	GO:0035556	intracellular signal transduction
P63000	biological_process	GO:0030168	platelet activation
P63000	biological_process	GO:0031295	T cell costimulation
P63000	biological_process	GO:0060263	regulation of respiratory burst
P63000	biological_process	GO:0030334	regulation of cell migration
P63000	biological_process	GO:0048870	cell motility
P63000	biological_process	GO:0007264	small GTPase mediated signal transduction
P63000	biological_process	GO:0010310	regulation of hydrogen peroxide metabolic process
P63000	biological_process	GO:0051668	localization within membrane
P63000	biological_process	GO:0030041	actin filament polymerization
P63000	biological_process	GO:0007411	axon guidance
P63000	biological_process	GO:0009611	response to wounding
P63000	biological_process	GO:0031529	ruffle organization
P63000	biological_process	GO:0009653	anatomical structure morphogenesis
P63000	biological_process	GO:0048261	negative regulation of receptor-mediated endocytosis
P63000	biological_process	GO:0050690	regulation of defense response to virus by virus
P63000	biological_process	GO:0032707	negative regulation of interleukin-23 production
P63000	biological_process	GO:0016032	viral reproduction
P63000	biological_process	GO:0006954	inflammatory response
P63000	biological_process	GO:0006915	apoptotic process
P63000	biological_process	GO:0007160	cell-matrix adhesion
P63000	biological_process	GO:0007155	cell adhesion
P63000	biological_process	GO:0006928	cellular component movement
P63000	biological_process	GO:0035025	positive regulation of Rho protein signal transduction
P63000	biological_process	GO:0010592	positive regulation of lamellipodium assembly
P63000	biological_process	GO:0051056	regulation of small GTPase mediated signal transduction
P78536	molecular_function	GO:0005138	interleukin-6 receptor binding
P78536	molecular_function	GO:0008237	metallopeptidase activity
P78536	molecular_function	GO:0005515	protein binding
P78536	molecular_function	GO:0005178	integrin binding
P78536	molecular_function	GO:0004222	metalloendopeptidase activity
P78536	molecular_function	GO:0030165	PDZ domain binding
P78536	cellular_component	GO:0016324	apical plasma membrane
P78536	cellular_component	GO:0005925	focal adhesion
P78536	cellular_component	GO:0032587	ruffle membrane
P78536	cellular_component	GO:0009986	cell surface
P78536	cellular_component	GO:0005887	integral to plasma membrane
P78536	cellular_component	GO:0045121	membrane raft
P78536	cellular_component	GO:0005911	cell-cell junction
P78536	cellular_component	GO:0015629	actin cytoskeleton
P78536	cellular_component	GO:0005886	plasma membrane
P78536	biological_process	GO:0010820	positive regulation of T cell chemotaxis
P78536	biological_process	GO:0006509	membrane protein ectodomain proteolysis
P78536	biological_process	GO:0030335	positive regulation of cell migration
P78536	biological_process	GO:0048011	nerve growth factor receptor signaling pathway
P78536	biological_process	GO:0033627	cell adhesion mediated by integrin
P78536	biological_process	GO:0007173	epidermal growth factor receptor signaling pathway
P78536	biological_process	GO:0055099	response to high density lipoprotein particle stimulus
P78536	biological_process	GO:0031293	membrane protein intracellular domain proteolysis
P78536	biological_process	GO:0042493	response to drug
P78536	biological_process	GO:0002690	positive regulation of leukocyte chemotaxis
P78536	biological_process	GO:0001666	response to hypoxia
P78536	biological_process	GO:0007155	cell adhesion
P78536	biological_process	GO:0032717	negative regulation of interleukin-8 production
P78536	biological_process	GO:0051088	PMA-inducible membrane protein ectodomain proteolysis
P78536	biological_process	GO:0033025	regulation of mast cell apoptotic process
P78536	biological_process	GO:0031659	positive regulation of cyclin-dependent protein kinase activity involved in G1/S
P78536	biological_process	GO:0030307	positive regulation of cell growth
P78536	biological_process	GO:0032496	response to lipopolysaccharide
P78536	biological_process	GO:0033077	T cell differentiation in thymus
P78536	biological_process	GO:0002446	neutrophil mediated immunity
P78536	biological_process	GO:0048870	cell motility
P78536	biological_process	GO:0048536	spleen development
P78536	biological_process	GO:0051272	positive regulation of cellular component movement
P78536	biological_process	GO:0001934	positive regulation of protein phosphorylation
P78536	biological_process	GO:0030183	B cell differentiation
P78536	biological_process	GO:0060397	JAK-STAT cascade involved in growth hormone signaling pathway
P78536	biological_process	GO:0045741	positive regulation of epidermal growth factor-activated receptor activity
P78536	biological_process	GO:0002467	germinal center formation
P78536	biological_process	GO:0035313	wound healing, spreading of epidermal cells
P78536	biological_process	GO:0030511	positive regulation of transforming growth factor beta receptor signaling pathway
P78536	biological_process	GO:0032722	positive regulation of chemokine production
P78536	biological_process	GO:0035625	epidermal growth factor-activated receptor transactivation by G-protein coupled receptor signaling pathway
P78536	biological_process	GO:0008284	positive regulation of cell proliferation
Q03001	molecular_function	GO:0008022	protein C-terminus binding
Q03001	molecular_function	GO:0005515	protein binding
Q03001	molecular_function	GO:0005178	integrin binding
Q03001	molecular_function	GO:0051010	microtubule plus-end binding
Q03001	molecular_function	GO:0042803	protein homodimerization activity
Q03001	cellular_component	GO:0031252	cell leading edge
Q03001	cellular_component	GO:0005634	nucleus
Q03001	cellular_component	GO:0045111	intermediate filament cytoskeleton
Q03001	cellular_component	GO:0035371	microtubule plus end
Q03001	cellular_component	GO:0015630	microtubule cytoskeleton
Q03001	cellular_component	GO:0016023	cytoplasmic membrane-bounded vesicle
Q03001	cellular_component	GO:0005737	cytoplasm
Q03001	cellular_component	GO:0009925	basal plasma membrane
Q03001	cellular_component	GO:0030018	Z disc
Q03001	cellular_component	GO:0030056	hemidesmosome
Q03001	cellular_component	GO:0015629	actin cytoskeleton
Q03001	cellular_component	GO:0033267	axon part
Q03001	cellular_component	GO:0005604	basement membrane
Q03001	biological_process	GO:0009611	response to wounding
Q03001	biological_process	GO:0000226	microtubule cytoskeleton organization
Q03001	biological_process	GO:0045104	intermediate filament cytoskeleton organization
Q03001	biological_process	GO:0031581	hemidesmosome assembly
Q03001	biological_process	GO:0048870	cell motility
Q03001	biological_process	GO:0007010	cytoskeleton organization
Q03001	biological_process	GO:0007229	integrin-mediated signaling pathway
Q03001	biological_process	GO:0030011	maintenance of cell polarity
Q05397	molecular_function	GO:0005515	protein binding
Q05397	molecular_function	GO:0004715	non-membrane spanning protein tyrosine kinase activity
Q05397	molecular_function	GO:0004672	protein kinase activity
Q05397	molecular_function	GO:0008432	JUN kinase binding
Q05397	molecular_function	GO:0042169	SH2 domain binding
Q05397	molecular_function	GO:0019901	protein kinase binding
Q05397	cellular_component	GO:0005856	cytoskeleton
Q05397	cellular_component	GO:0005634	nucleus
Q05397	cellular_component	GO:0005925	focal adhesion
Q05397	cellular_component	GO:0005829	cytosol
Q05397	cellular_component	GO:0005737	cytoplasm
Q05397	biological_process	GO:0030335	positive regulation of cell migration
Q05397	biological_process	GO:0007596	blood coagulation
Q05397	biological_process	GO:0042127	regulation of cell proliferation
Q05397	biological_process	GO:0001890	placenta development
Q05397	biological_process	GO:0051893	regulation of focal adhesion assembly
Q05397	biological_process	GO:0022408	negative regulation of cell-cell adhesion
Q05397	biological_process	GO:2000060	positive regulation of protein ubiquitination involved in ubiquitin-dependent protein catabolic process
Q05397	biological_process	GO:0060396	growth hormone receptor signaling pathway
Q05397	biological_process	GO:0010594	regulation of endothelial cell migration
Q05397	biological_process	GO:0007411	axon guidance
Q05397	biological_process	GO:0001525	angiogenesis
Q05397	biological_process	GO:0048013	ephrin receptor signaling pathway
Q05397	biological_process	GO:0014068	positive regulation of phosphatidylinositol 3-kinase cascade
Q05397	biological_process	GO:0043066	negative regulation of apoptotic process
Q05397	biological_process	GO:0008360	regulation of cell shape
Q05397	biological_process	GO:0046777	protein autophosphorylation
Q05397	biological_process	GO:0006915	apoptotic process
Q05397	biological_process	GO:0043552	positive regulation of phosphatidylinositol 3-kinase activity
Q05397	biological_process	GO:0030010	establishment of cell polarity
Q05397	biological_process	GO:0051493	regulation of cytoskeleton organization
Q05397	biological_process	GO:0009790	embryo development
Q05397	biological_process	GO:0045667	regulation of osteoblast differentiation
Q05397	biological_process	GO:0051897	positive regulation of protein kinase B signaling cascade
Q05397	biological_process	GO:0030168	platelet activation
Q05397	biological_process	GO:0003007	heart morphogenesis
Q05397	biological_process	GO:0033628	regulation of cell adhesion mediated by integrin
Q05397	biological_process	GO:0006921	cellular component disassembly involved in execution phase of apoptosis
Q05397	biological_process	GO:0048870	cell motility
Q05397	biological_process	GO:0007229	integrin-mediated signaling pathway
Q05397	biological_process	GO:0001934	positive regulation of protein phosphorylation
Q05397	biological_process	GO:0038007	netrin-activated signaling pathway
Q05397	biological_process	GO:0045860	positive regulation of protein kinase activity
Q05397	biological_process	GO:0018108	peptidyl-tyrosine phosphorylation
Q05397	biological_process	GO:0032319	regulation of Rho GTPase activity
Q05397	biological_process	GO:2000811	negative regulation of anoikis
Q05397	biological_process	GO:0008284	positive regulation of cell proliferation
Q16658	molecular_function	GO:0051015	actin filament binding
Q16658	molecular_function	GO:0003779	actin binding
Q16658	molecular_function	GO:0005515	protein binding
Q16658	molecular_function	GO:0008144	drug binding
Q16658	cellular_component	GO:0001725	stress fiber
Q16658	cellular_component	GO:0071437	invadopodium
Q16658	cellular_component	GO:0015629	actin cytoskeleton
Q16658	cellular_component	GO:0030175	filopodium
Q16658	biological_process	GO:0016477	cell migration
Q16658	biological_process	GO:0030036	actin cytoskeleton organization
Q16658	biological_process	GO:0008283	cell proliferation
Q16658	biological_process	GO:0051017	actin filament bundle assembly
Q16658	biological_process	GO:0048870	cell motility
O33407	molecular_function	GO:0004091	carboxylesterase activity
O33407	cellular_component	GO:0009279	cell outer membrane
O33407	biological_process	GO:0048870	cell motility
O33407	biological_process	GO:0042710	biofilm formation
O33407	biological_process	GO:0008610	lipid biosynthetic process
P80236	molecular_function	GO:0005525	GTP binding
P80236	biological_process	GO:0030334	regulation of cell migration
P80236	biological_process	GO:0048870	cell motility

## Sheet: c) StatisticalData
nterms	all_list_pg	all_list_ng	all_list_posprop	all_list_negprop	all_list_sens	all_list_spec	all_list_ppv	all_list_npv	all_list_acc	query_list_pg	query_list_ng	query_list_posprop	query_list_negprop	query_list_sens	query_list_spec	query_list_ppv	query_list_npv	query_list_acc	parchild_list_pg	parchild_list_ng	parchild_list_posprop	parchild_list_negprop	parchild_list_sens	parchild_list_spec	parchild_list_ppv	parchild_list_npv	parchild_list_acc
10	22	60	0.536585	0.38961	0.536585	0.61039	0.268293	0.831858	0.594872	27	5	0.658537	0.0324675	0.658537	0.967532	0.84375	0.91411	0.902564	33	53	0.804878	0.344156	0.804878	0.655844	0.383721	0.926606	0.687179
20	34	62	0.829268	0.402597	0.829268	0.597403	0.354167	0.929293	0.646154	32	6	0.780488	0.038961	0.780488	0.961039	0.842105	0.942675	0.923077	34	61	0.829268	0.396104	0.829268	0.603896	0.357895	0.93	0.651282
30	35	69	0.853659	0.448052	0.853659	0.551948	0.336538	0.934066	0.615385	33	12	0.804878	0.0779221	0.804878	0.922078	0.733333	0.946667	0.897436	34	64	0.829268	0.415584	0.829268	0.584416	0.346939	0.927835	0.635897
40	36	72	0.878049	0.467532	0.878049	0.532468	0.333333	0.942529	0.605128	34	21	0.829268	0.136364	0.829268	0.863636	0.618182	0.95	0.85641	34	65	0.829268	0.422078	0.829268	0.577922	0.343434	0.927083	0.630769
50	37	73	0.902439	0.474026	0.902439	0.525974	0.336364	0.952941	0.605128	35	27	0.853659	0.175325	0.853659	0.824675	0.564516	0.954887	0.830769	34	65	0.829268	0.422078	0.829268	0.577922	0.343434	0.927083	0.630769
60	37	73	0.902439	0.474026	0.902439	0.525974	0.336364	0.952941	0.605128	40	67	0.97561	0.435065	0.97561	0.564935	0.373832	0.988636	0.651282	34	66	0.829268	0.428571	0.829268	0.571429	0.34	0.926316	0.625641
70	37	74	0.902439	0.480519	0.902439	0.519481	0.333333	0.952381	0.6										34	66	0.829268	0.428571	0.829268	0.571429	0.34	0.926316	0.625641
80	37	74	0.902439	0.480519	0.902439	0.519481	0.333333	0.952381	0.6										34	69	0.829268	0.448052	0.829268	0.551948	0.330097	0.923913	0.610256
90	37	74	0.902439	0.480519	0.902439	0.519481	0.333333	0.952381	0.6										34	69	0.829268	0.448052	0.829268	0.551948	0.330097	0.923913	0.610256
100	37	74	0.902439	0.480519	0.902439	0.519481	0.333333	0.952381	0.6										34	69	0.829268	0.448052	0.829268	0.551948	0.330097	0.923913	0.610256
110	37	76	0.902439	0.493506	0.902439	0.506494	0.327434	0.95122	0.589744										34	70	0.829268	0.454545	0.829268	0.545455	0.326923	0.923077	0.605128
120	37	76	0.902439	0.493506	0.902439	0.506494	0.327434	0.95122	0.589744										34	71	0.829268	0.461039	0.829268	0.538961	0.32381	0.922222	0.6
130	37	76	0.902439	0.493506	0.902439	0.506494	0.327434	0.95122	0.589744										34	76	0.829268	0.493506	0.829268	0.506494	0.309091	0.917647	0.574359
140	37	76	0.902439	0.493506	0.902439	0.506494	0.327434	0.95122	0.589744										34	83	0.829268	0.538961	0.829268	0.461039	0.290598	0.910256	0.538462
150	37	79	0.902439	0.512987	0.902439	0.487013	0.318966	0.949367	0.574359										34	83	0.829268	0.538961	0.829268	0.461039	0.290598	0.910256	0.538462
160	37	79	0.902439	0.512987	0.902439	0.487013	0.318966	0.949367	0.574359
170	37	79	0.902439	0.512987	0.902439	0.487013	0.318966	0.949367	0.574359
180	39	80	0.95122	0.519481	0.95122	0.480519	0.327731	0.973684	0.579487
190	39	83	0.95122	0.538961	0.95122	0.461039	0.319672	0.972603	0.564103
200	39	83	0.95122	0.538961	0.95122	0.461039	0.319672	0.972603	0.564103
210	39	83	0.95122	0.538961	0.95122	0.461039	0.319672	0.972603	0.564103
220	39	83	0.95122	0.538961	0.95122	0.461039	0.319672	0.972603	0.564103
230	39	86	0.95122	0.558442	0.95122	0.441558	0.312	0.971429	0.548718
240	39	86	0.95122	0.558442	0.95122	0.441558	0.312	0.971429	0.548718
250	39	86	0.95122	0.558442	0.95122	0.441558	0.312	0.971429	0.548718
260	39	86	0.95122	0.558442	0.95122	0.441558	0.312	0.971429	0.548718
270	39	88	0.95122	0.571429	0.95122	0.428571	0.307087	0.970588	0.538462
280	39	88	0.95122	0.571429	0.95122	0.428571	0.307087	0.970588	0.538462
290	39	107	0.95122	0.694805	0.95122	0.305195	0.267123	0.959184	0.441026
300	39	110	0.95122	0.714286	0.95122	0.285714	0.261745	0.956522	0.425641
310	39	110	0.95122	0.714286	0.95122	0.285714	0.261745	0.956522	0.425641
320	39	110	0.95122	0.714286	0.95122	0.285714	0.261745	0.956522	0.425641
330	39	110	0.95122	0.714286	0.95122	0.285714	0.261745	0.956522	0.425641
340	39	110	0.95122	0.714286	0.95122	0.285714	0.261745	0.956522	0.425641
350	39	110	0.95122	0.714286	0.95122	0.285714	0.261745	0.956522	0.425641
360	39	110	0.95122	0.714286	0.95122	0.285714	0.261745	0.956522	0.425641
370	39	110	0.95122	0.714286	0.95122	0.285714	0.261745	0.956522	0.425641
380	39	111	0.95122	0.720779	0.95122	0.279221	0.26	0.955556	0.420513
390	39	111	0.95122	0.720779	0.95122	0.279221	0.26	0.955556	0.420513
400	39	111	0.95122	0.720779	0.95122	0.279221	0.26	0.955556	0.420513
410	39	111	0.95122	0.720779	0.95122	0.279221	0.26	0.955556	0.420513
420	39	111	0.95122	0.720779	0.95122	0.279221	0.26	0.955556	0.420513
430	39	111	0.95122	0.720779	0.95122	0.279221	0.26	0.955556	0.420513
440	39	112	0.95122	0.727273	0.95122	0.272727	0.258278	0.954545	0.415385
450	39	112	0.95122	0.727273	0.95122	0.272727	0.258278	0.954545	0.415385
460	39	112	0.95122	0.727273	0.95122	0.272727	0.258278	0.954545	0.415385
470	39	112	0.95122	0.727273	0.95122	0.272727	0.258278	0.954545	0.415385
480	39	112	0.95122	0.727273	0.95122	0.272727	0.258278	0.954545	0.415385
490	39	112	0.95122	0.727273	0.95122	0.272727	0.258278	0.954545	0.415385
500	39	112	0.95122	0.727273	0.95122	0.272727	0.258278	0.954545	0.415385
510	39	112	0.95122	0.727273	0.95122	0.272727	0.258278	0.954545	0.415385
520	39	112	0.95122	0.727273	0.95122	0.272727	0.258278	0.954545	0.415385
530	39	112	0.95122	0.727273	0.95122	0.272727	0.258278	0.954545	0.415385
540	39	114	0.95122	0.74026	0.95122	0.25974	0.254902	0.952381	0.405128
550	39	115	0.95122	0.746753	0.95122	0.253247	0.253247	0.95122	0.4
560	39	115	0.95122	0.746753	0.95122	0.253247	0.253247	0.95122	0.4
570	39	115	0.95122	0.746753	0.95122	0.253247	0.253247	0.95122	0.4
580	39	115	0.95122	0.746753	0.95122	0.253247	0.253247	0.95122	0.4
590	39	115	0.95122	0.746753	0.95122	0.253247	0.253247	0.95122	0.4
600	39	115	0.95122	0.746753	0.95122	0.253247	0.253247	0.95122	0.4
610	39	115	0.95122	0.746753	0.95122	0.253247	0.253247	0.95122	0.4
620	39	115	0.95122	0.746753	0.95122	0.253247	0.253247	0.95122	0.4
630	39	115	0.95122	0.746753	0.95122	0.253247	0.253247	0.95122	0.4
640	39	119	0.95122	0.772727	0.95122	0.227273	0.246835	0.945946	0.379487
650	40	119	0.97561	0.772727	0.97561	0.227273	0.251572	0.972222	0.384615
660	40	119	0.97561	0.772727	0.97561	0.227273	0.251572	0.972222	0.384615
670	40	120	0.97561	0.779221	0.97561	0.220779	0.25	0.971429	0.379487
680	40	120	0.97561	0.779221	0.97561	0.220779	0.25	0.971429	0.379487
690	40	120	0.97561	0.779221	0.97561	0.220779	0.25	0.971429	0.379487
700	40	120	0.97561	0.779221	0.97561	0.220779	0.25	0.971429	0.379487
710	40	120	0.97561	0.779221	0.97561	0.220779	0.25	0.971429	0.379487
720	40	120	0.97561	0.779221	0.97561	0.220779	0.25	0.971429	0.379487
730	40	120	0.97561	0.779221	0.97561	0.220779	0.25	0.971429	0.379487
740	40	120	0.97561	0.779221	0.97561	0.220779	0.25	0.971429	0.379487
750	40	120	0.97561	0.779221	0.97561	0.220779	0.25	0.971429	0.379487
760	40	120	0.97561	0.779221	0.97561	0.220779	0.25	0.971429	0.379487
770	40	120	0.97561	0.779221	0.97561	0.220779	0.25	0.971429	0.379487
780	40	120	0.97561	0.779221	0.97561	0.220779	0.25	0.971429	0.379487
790	40	120	0.97561	0.779221	0.97561	0.220779	0.25	0.971429	0.379487
800	40	120	0.97561	0.779221	0.97561	0.220779	0.25	0.971429	0.379487
810	40	120	0.97561	0.779221	0.97561	0.220779	0.25	0.971429	0.379487
820	40	120	0.97561	0.779221	0.97561	0.220779	0.25	0.971429	0.379487
830	40	120	0.97561	0.779221	0.97561	0.220779	0.25	0.971429	0.379487
840	40	120	0.97561	0.779221	0.97561	0.220779	0.25	0.971429	0.379487
850	40	120	0.97561	0.779221	0.97561	0.220779	0.25	0.971429	0.379487
860	40	120	0.97561	0.779221	0.97561	0.220779	0.25	0.971429	0.379487
870	40	120	0.97561	0.779221	0.97561	0.220779	0.25	0.971429	0.379487
880	40	120	0.97561	0.779221	0.97561	0.220779	0.25	0.971429	0.379487
890	40	120	0.97561	0.779221	0.97561	0.220779	0.25	0.971429	0.379487
900	40	120	0.97561	0.779221	0.97561	0.220779	0.25	0.971429	0.379487
910	40	120	0.97561	0.779221	0.97561	0.220779	0.25	0.971429	0.379487
920	40	121	0.97561	0.785714	0.97561	0.214286	0.248447	0.970588	0.374359
930	40	121	0.97561	0.785714	0.97561	0.214286	0.248447	0.970588	0.374359
940	40	121	0.97561	0.785714	0.97561	0.214286	0.248447	0.970588	0.374359
950	40	121	0.97561	0.785714	0.97561	0.214286	0.248447	0.970588	0.374359
960	40	121	0.97561	0.785714	0.97561	0.214286	0.248447	0.970588	0.374359
970	40	121	0.97561	0.785714	0.97561	0.214286	0.248447	0.970588	0.374359
980	40	122	0.97561	0.792208	0.97561	0.207792	0.246914	0.969697	0.369231
990	40	123	0.97561	0.798701	0.97561	0.201299	0.245399	0.96875	0.364103
1000	40	125	0.97561	0.811688	0.97561	0.188312	0.242424	0.966667	0.353846
1010	40	125	0.97561	0.811688	0.97561	0.188312	0.242424	0.966667	0.353846
1020	40	125	0.97561	0.811688	0.97561	0.188312	0.242424	0.966667	0.353846
1030	40	127	0.97561	0.824675	0.97561	0.175325	0.239521	0.964286	0.34359
1040	40	127	0.97561	0.824675	0.97561	0.175325	0.239521	0.964286	0.34359
