# Supplementary material for: GOLink: Finding Cooccurring Terms across Gene Ontology Namespaces
Source: Int J Genomics. 2013 Dec 31;2013:594528. doi: 10.1155/2013/594528 (PMC3892482; doi:10.1155/2013/594528)
Supplement: Supplementary file 1 — (SupplementaryFile1.xls): GOLink terms lists generated using the query term ‘regulation of gene expression', the evidence code filter “!IEA” and database filter ‘UniProtKB'. Supplementary File 2 (SupplementaryFile2.xls): The top 50 Molecular Function terms from each GOLink terms list (a); the genes and annotation used for the positive list and the negative list (b); the raw statistical data for sensitivity, specificity, accuracy, PPV, NPV and the number and proportion of positive and negative genes found (c). These latter data correspond to Figure 3. Supplementary File 3 (SupplementaryFile3.xls): The genes and annotation used for the positive list and the negative list and raw statistical data for sensitivity, specificity, accuracy, PPV, NPV and the number and proportion of positive and negative genes found when the true positives from Supplementary Table 2 are removed (a). The raw statistical data when both the true positives and the term ‘protein binding' are removed from the GOLink terms lists (b). Supplementary File 4 (SupplementaryFile4.xls): The five GOLink all_list terms lists generated using the query term ‘regulation of gene expression' and the evidence code filter “!IEA” for each of the five annotation sources (“UniprotKB, “PomBase”, “MGI”, “SGD” and “ZFIN”) used in the creation of Figure 4. Supplementary File 5 (SupplementaryFile5.xls): a) Summary of the top 100 terms from a GOLink query_list terms list (b) and a QuickGO terms list (c) generated using the query term ‘regulation of gene expression' and the evidence code filter “!IEA”. Supplementary Figure 1 (SupplementaryFigure1.jpg): Venn diagram showing the overlap between the top 50 Molecular Function terms from each of the three GOLink terms lists as found in Supplementary File 2. Supplementary Table 1 (SupplementaryTable1.doc): The 59 GOLink consensus terms found in all three GOLink terms lists. Supplementary Table 2 (SupplementaryTable2.doc): Genes from the negative list deemed t [file 594528.f1.zip › Files/SupplementaryFile4.xls]

## Sheet: MGI
Namespace	GO_ID	GO_Name	Together	TermCount	SubjectCount	Score(PR)	Score(S%)
cellular_component	GO:0005634	nucleus	1369	3429	162	4.08	30.68
biological_process	GO:0045944	positive regulation of transcription from RNA polymerase II promoter	718	718	162	10.21	29.89
molecular_function	GO:0005515	protein binding	1096	3409	162	3.28	23.24
biological_process	GO:0000122	negative regulation of transcription from RNA polymerase II promoter	551	551	162	10.21	22.94
biological_process	GO:0045893	positive regulation of transcription, DNA-dependent	522	522	162	10.21	21.73
molecular_function	GO:0003677	DNA binding	456	558	162	8.35	18.21
biological_process	GO:0045892	negative regulation of transcription, DNA-dependent	426	426	162	10.21	17.74
cellular_component	GO:0005737	cytoplasm	850	3404	162	2.55	17.15
molecular_function	GO:0003700	sequence-specific DNA binding transcription factor activity	405	414	162	9.99	16.8
biological_process	GO:0006355	regulation of transcription, DNA-dependent	354	354	162	10.21	14.74
cellular_component	GO:0005667	transcription factor complex	257	268	162	9.8	10.65
molecular_function	GO:0008134	transcription factor binding	257	281	162	9.34	10.59
molecular_function	GO:0043565	sequence-specific DNA binding	254	280	162	9.27	10.46
biological_process	GO:0043066	negative regulation of apoptotic process	249	477	162	5.33	9.47
biological_process	GO:0006357	regulation of transcription from RNA polymerase II promoter	210	210	162	10.21	8.74
molecular_function	GO:0003682	chromatin binding	214	275	162	7.95	8.69
biological_process	GO:0008284	positive regulation of cell proliferation	195	374	162	5.33	7.56
biological_process	GO:0010628	positive regulation of gene expression	176	176	162	10.21	7.33
cellular_component	GO:0005829	cytosol	220	840	162	2.68	7.28
biological_process	GO:0008285	negative regulation of cell proliferation	174	302	162	5.89	6.88
biological_process	GO:0010468	regulation of gene expression	162	162	162	10.21	6.74
molecular_function	GO:0042803	protein homodimerization activity	188	577	162	3.33	6.74
cellular_component	GO:0005886	plasma membrane	246	1495	162	1.68	6.74
molecular_function	GO:0044212	transcription regulatory region DNA binding	159	165	162	9.84	6.6
cellular_component	GO:0005615	extracellular space	173	652	162	2.71	6
molecular_function	GO:0042802	identical protein binding	151	445	162	3.47	5.6
molecular_function	GO:0046982	protein heterodimerization activity	144	345	162	4.26	5.53
biological_process	GO:0006468	protein phosphorylation	145	396	162	3.74	5.47
cellular_component	GO:0005730	nucleolus	146	494	162	3.02	5.31
biological_process	GO:0001701	in utero embryonic development	133	259	162	5.25	5.26
biological_process	GO:0010629	negative regulation of gene expression	121	121	162	10.21	5.04
molecular_function	GO:0003713	transcription coactivator activity	118	138	162	8.73	4.87
molecular_function	GO:0003690	double-stranded DNA binding	114	134	162	8.69	4.71
biological_process	GO:0043065	positive regulation of apoptotic process	115	242	162	4.85	4.55
molecular_function	GO:0003714	transcription corepressor activity	108	112	162	9.85	4.49
molecular_function	GO:0019899	enzyme binding	110	243	162	4.62	4.34
cellular_component	GO:0043234	protein complex	116	397	162	2.98	4.32
molecular_function	GO:0003705	RNA polymerase II distal enhancer sequence-specific DNA binding transcription factor activity	100	101	162	10.11	4.16
biological_process	GO:0007507	heart development	98	166	162	6.03	3.97
molecular_function	GO:0019901	protein kinase binding	103	294	162	3.58	3.97
cellular_component	GO:0009986	cell surface	104	385	162	2.76	3.88
cellular_component	GO:0048471	perinuclear region of cytoplasm	103	389	162	2.7	3.83
molecular_function	GO:0019904	protein domain specific binding	93	228	162	4.17	3.67
biological_process	GO:0051092	positive regulation of NF-kappaB transcription factor activity	84	84	162	10.21	3.5
biological_process	GO:0009952	anterior/posterior pattern specification	82	119	162	7.04	3.36
biological_process	GO:0007165	signal transduction	86	254	162	3.46	3.35
biological_process	GO:0006366	transcription from RNA polymerase II promoter	79	102	162	7.91	3.26
cellular_component	GO:0016020	membrane	97	679	162	1.46	3.25
molecular_function	GO:0005102	receptor binding	82	244	162	3.43	3.2
cellular_component	GO:0005739	mitochondrion	118	1436	162	0.84	3.17
biological_process	GO:0051091	positive regulation of sequence-specific DNA binding transcription factor activity	76	76	162	10.21	3.16
molecular_function	GO:0031625	ubiquitin protein ligase binding	78	145	162	5.49	3.16
molecular_function	GO:0032403	protein complex binding	81	239	162	3.46	3.16
biological_process	GO:0007389	pattern specification process	75	87	162	8.81	3.11
cellular_component	GO:0005794	Golgi apparatus	89	562	162	1.62	3.1
biological_process	GO:0042127	regulation of cell proliferation	76	134	162	5.79	3.09
biological_process	GO:0001934	positive regulation of protein phosphorylation	75	108	162	7.09	3.08
biological_process	GO:0006915	apoptotic process	78	217	162	3.67	3.07
biological_process	GO:0030154	cell differentiation	74	102	162	7.41	3.05
molecular_function	GO:0001077	RNA polymerase II core promoter proximal region sequence-specific DNA binding transcription factor activity involved in positive regulation of transcription	72	73	162	10.07	3
biological_process	GO:0060070	canonical Wnt receptor signaling pathway	72	84	162	8.76	2.98
biological_process	GO:0042981	regulation of apoptotic process	73	144	162	5.18	2.95
cellular_component	GO:0043231	intracellular membrane-bounded organelle	78	453	162	1.76	2.81
biological_process	GO:0009887	organ morphogenesis	68	102	162	6.81	2.79
molecular_function	GO:0004672	protein kinase activity	69	140	162	5.03	2.79
biological_process	GO:0006917	induction of apoptosis	69	167	162	4.22	2.76
biological_process	GO:0009790	embryo development	67	105	162	6.52	2.75
biological_process	GO:0043524	negative regulation of neuron apoptotic process	67	111	162	6.17	2.74
cellular_component	GO:0043025	neuronal cell body	73	361	162	2.07	2.71
biological_process	GO:0030308	negative regulation of cell growth	66	116	162	5.81	2.69
biological_process	GO:0008283	cell proliferation	67	171	162	4	2.67
biological_process	GO:0050821	protein stabilization	64	64	162	10.21	2.66
biological_process	GO:0030324	lung development	64	103	162	6.35	2.62
cellular_component	GO:0030425	dendrite	68	273	162	2.54	2.61
molecular_function	GO:0004674	protein serine/threonine kinase activity	66	203	162	3.32	2.6
biological_process	GO:0030509	BMP signaling pathway	61	61	162	10.21	2.54
cellular_component	GO:0000790	nuclear chromatin	61	84	162	7.42	2.52
cellular_component	GO:0005654	nucleoplasm	62	133	162	4.76	2.51
cellular_component	GO:0005622	intracellular	65	284	162	2.34	2.48
biological_process	GO:0045666	positive regulation of neuron differentiation	59	78	162	7.73	2.44
molecular_function	GO:0005524	ATP binding	63	255	162	2.52	2.43
biological_process	GO:0007420	brain development	59	114	162	5.29	2.4
biological_process	GO:0030335	positive regulation of cell migration	59	122	162	4.94	2.39
biological_process	GO:0043433	negative regulation of sequence-specific DNA binding transcription factor activity	56	56	162	10.21	2.33
biological_process	GO:0032088	negative regulation of NF-kappaB transcription factor activity	55	55	162	10.21	2.29
molecular_function	GO:0042826	histone deacetylase binding	54	65	162	8.49	2.24
biological_process	GO:0046777	protein autophosphorylation	56	159	162	3.6	2.24
molecular_function	GO:0008301	DNA binding, bending	53	55	162	9.84	2.2
biological_process	GO:0007283	spermatogenesis	55	160	162	3.51	2.19
biological_process	GO:0070374	positive regulation of ERK1 and ERK2 cascade	53	87	162	6.22	2.18
cellular_component	GO:0005783	endoplasmic reticulum	62	503	162	1.26	2.18
biological_process	GO:0030182	neuron differentiation	52	83	162	6.4	2.14
molecular_function	GO:0003723	RNA binding	53	132	162	4.1	2.14
molecular_function	GO:0008022	protein C-terminus binding	53	175	162	3.09	2.1
biological_process	GO:0051090	regulation of sequence-specific DNA binding transcription factor activity	50	50	162	10.21	2.08
biological_process	GO:0090090	negative regulation of canonical Wnt receptor signaling pathway	50	77	162	6.63	2.06
cellular_component	GO:0045121	membrane raft	52	173	162	3.07	2.06
biological_process	GO:0006974	response to DNA damage stimulus	51	133	162	3.92	2.05
biological_process	GO:0001525	angiogenesis	50	112	162	4.56	2.03
biological_process	GO:0030900	forebrain development	49	73	162	6.86	2.02
molecular_function	GO:0004842	ubiquitin-protein ligase activity	51	190	162	2.74	2.01
biological_process	GO:0060021	palate development	48	64	162	7.66	1.99
biological_process	GO:0043123	positive regulation of I-kappaB kinase/NF-kappaB cascade	49	105	162	4.77	1.99
biological_process	GO:0001822	kidney development	48	89	162	5.51	1.96
biological_process	GO:0009791	post-embryonic development	48	92	162	5.33	1.96
biological_process	GO:0006954	inflammatory response	48	112	162	4.38	1.95
cellular_component	GO:0030424	axon	50	207	162	2.47	1.95
biological_process	GO:0016055	Wnt receptor signaling pathway	47	73	162	6.58	1.94
biological_process	GO:0001501	skeletal system development	47	87	162	5.52	1.92
biological_process	GO:0045766	positive regulation of angiogenesis	47	91	162	5.28	1.92
biological_process	GO:0045165	cell fate commitment	45	49	162	9.38	1.87
biological_process	GO:0007411	axon guidance	46	108	162	4.35	1.87
biological_process	GO:0045669	positive regulation of osteoblast differentiation	45	56	162	8.21	1.86
molecular_function	GO:0003729	mRNA binding	44	67	162	6.71	1.81
cellular_component	GO:0043005	neuron projection	47	249	162	1.93	1.8
cellular_component	GO:0017053	transcriptional repressor complex	43	44	162	9.98	1.79
cellular_component	GO:0005813	centrosome	48	334	162	1.47	1.79
biological_process	GO:0006351	transcription, DNA-dependent	43	53	162	8.29	1.78
biological_process	GO:0045665	negative regulation of neuron differentiation	43	59	162	7.44	1.78
biological_process	GO:0042472	inner ear morphogenesis	43	69	162	6.37	1.77
biological_process	GO:0001843	neural tube closure	43	78	162	5.63	1.76
biological_process	GO:0045668	negative regulation of osteoblast differentiation	42	46	162	9.33	1.75
molecular_function	GO:0008270	zinc ion binding	44	150	162	3	1.75
biological_process	GO:0050679	positive regulation of epithelial cell proliferation	42	61	162	7.03	1.73
biological_process	GO:0007050	cell cycle arrest	42	64	162	6.7	1.73
biological_process	GO:0016567	protein ubiquitination	43	134	162	3.28	1.72
biological_process	GO:0001666	response to hypoxia	42	101	162	4.25	1.71
biological_process	GO:0051216	cartilage development	41	56	162	7.48	1.7
biological_process	GO:0007399	nervous system development	42	112	162	3.83	1.7
biological_process	GO:0001570	vasculogenesis	41	64	162	6.54	1.69
cellular_component	GO:0000785	chromatin	41	71	162	5.9	1.69
biological_process	GO:0071222	cellular response to lipopolysaccharide	41	95	162	4.41	1.67
biological_process	GO:0001764	neuron migration	41	99	162	4.23	1.67
cellular_component	GO:0005887	integral to plasma membrane	47	452	162	1.06	1.67
molecular_function	GO:0002039	p53 binding	40	50	162	8.17	1.66
cellular_component	GO:0005576	extracellular region	43	235	162	1.87	1.66
biological_process	GO:0007267	cell-cell signaling	40	57	162	7.17	1.65
biological_process	GO:0030326	embryonic limb morphogenesis	40	59	162	6.93	1.65
biological_process	GO:0007179	transforming growth factor beta receptor signaling pathway	39	58	162	6.87	1.61
biological_process	GO:0043010	camera-type eye development	39	65	162	6.13	1.61
biological_process	GO:0042493	response to drug	40	129	162	3.17	1.61
biological_process	GO:0032496	response to lipopolysaccharide	39	88	162	4.53	1.59
biological_process	GO:0019827	stem cell maintenance	38	48	162	8.09	1.58
biological_process	GO:0042475	odontogenesis of dentin-containing tooth	38	50	162	7.76	1.57
biological_process	GO:0035914	skeletal muscle cell differentiation	38	50	162	7.76	1.57
biological_process	GO:0016477	cell migration	39	122	162	3.27	1.57
biological_process	GO:0045727	positive regulation of translation	37	37	162	10.21	1.54
biological_process	GO:0001568	blood vessel development	37	61	162	6.2	1.53
cellular_component	GO:0009897	external side of plasma membrane	40	244	162	1.67	1.53
biological_process	GO:0043154	negative regulation of cysteine-type endopeptidase activity involved in apoptotic process	37	70	162	5.4	1.52
molecular_function	GO:0000981	sequence-specific DNA binding RNA polymerase II transcription factor activity	36	36	162	10.21	1.5
biological_process	GO:0003151	outflow tract morphogenesis	36	40	162	9.19	1.5
biological_process	GO:0001658	branching involved in ureteric bud morphogenesis	36	41	162	8.97	1.5
molecular_function	GO:0047485	protein N-terminus binding	37	94	162	4.02	1.5
biological_process	GO:0001947	heart looping	36	43	162	8.55	1.49
biological_process	GO:0006338	chromatin remodeling	36	51	162	7.21	1.49
molecular_function	GO:0005125	cytokine activity	36	65	162	5.66	1.48
biological_process	GO:0050731	positive regulation of peptidyl-tyrosine phosphorylation	36	73	162	5.04	1.48
molecular_function	GO:0046332	SMAD binding	35	46	162	7.77	1.45
biological_process	GO:0003007	heart morphogenesis	35	52	162	6.88	1.45
biological_process	GO:0048704	embryonic skeletal system morphogenesis	35	52	162	6.88	1.45
biological_process	GO:0018105	peptidyl-serine phosphorylation	35	70	162	5.11	1.44
biological_process	GO:0051726	regulation of cell cycle	35	83	162	4.31	1.43
biological_process	GO:0017148	negative regulation of translation	34	34	162	10.21	1.42
biological_process	GO:0035019	somatic stem cell maintenance	34	40	162	8.68	1.41
biological_process	GO:0033138	positive regulation of peptidyl-serine phosphorylation	34	43	162	8.08	1.41
biological_process	GO:0001649	osteoblast differentiation	34	47	162	7.39	1.41
biological_process	GO:0050680	negative regulation of epithelial cell proliferation	34	47	162	7.39	1.41
biological_process	GO:0090263	positive regulation of canonical Wnt receptor signaling pathway	34	49	162	7.09	1.41
biological_process	GO:0001889	liver development	34	55	162	6.31	1.4
biological_process	GO:0048661	positive regulation of smooth muscle cell proliferation	34	56	162	6.2	1.4
biological_process	GO:0035264	multicellular organism growth	34	68	162	5.11	1.4
biological_process	GO:0030097	hemopoiesis	34	74	162	4.69	1.39
biological_process	GO:0030307	positive regulation of cell growth	34	77	162	4.51	1.39
biological_process	GO:0006979	response to oxidative stress	34	86	162	4.04	1.39
biological_process	GO:0030514	negative regulation of BMP signaling pathway	33	33	162	10.21	1.37
biological_process	GO:0001756	somitogenesis	33	47	162	7.17	1.37
molecular_function	GO:0008013	beta-catenin binding	33	59	162	5.71	1.36
biological_process	GO:0006919	activation of cysteine-type endopeptidase activity involved in apoptotic process	33	69	162	4.89	1.35
biological_process	GO:0043410	positive regulation of MAPK cascade	33	77	162	4.38	1.35
molecular_function	GO:0001078	RNA polymerase II core promoter proximal region sequence-specific DNA binding transcription factor activity involved in negative regulation of transcription	32	32	162	10.21	1.33
molecular_function	GO:0030374	ligand-dependent nuclear receptor transcription coactivator activity	32	34	162	9.61	1.33
biological_process	GO:0007492	endoderm development	32	42	162	7.78	1.33
biological_process	GO:0009953	dorsal/ventral pattern formation	32	48	162	6.81	1.32
molecular_function	GO:0042393	histone binding	32	54	162	6.05	1.32
biological_process	GO:0055114	oxidation-reduction process	36	376	162	0.98	1.31
biological_process	GO:0030512	negative regulation of transforming growth factor beta receptor signaling pathway	31	40	162	7.92	1.29
cellular_component	GO:0016607	nuclear speck	31	65	162	4.87	1.27
cellular_component	GO:0030529	ribonucleoprotein complex	31	83	162	3.82	1.26
biological_process	GO:0046330	positive regulation of JNK cascade	30	49	162	6.25	1.24
cellular_component	GO:0016605	PML body	30	51	162	6.01	1.24
biological_process	GO:0042733	embryonic digit morphogenesis	30	51	162	6.01	1.24
molecular_function	GO:0008083	growth factor activity	30	57	162	5.38	1.24
cellular_component	GO:0016363	nuclear matrix	30	57	162	5.38	1.24
biological_process	GO:0019221	cytokine-mediated signaling pathway	30	74	162	4.14	1.23
biological_process	GO:0007409	axonogenesis	30	91	162	3.37	1.22
cellular_component	GO:0031012	extracellular matrix	30	103	162	2.98	1.21
molecular_function	GO:0030165	PDZ domain binding	30	105	162	2.92	1.21
biological_process	GO:0045597	positive regulation of cell differentiation	29	35	162	8.46	1.2
biological_process	GO:0001933	negative regulation of protein phosphorylation	29	43	162	6.89	1.2
biological_process	GO:0007519	skeletal muscle tissue development	29	46	162	6.44	1.2
biological_process	GO:0051897	positive regulation of protein kinase B signaling cascade	29	59	162	5.02	1.19
biological_process	GO:0000165	MAPK cascade	29	64	162	4.63	1.19
biological_process	GO:0010976	positive regulation of neuron projection development	29	67	162	4.42	1.19
biological_process	GO:0030336	negative regulation of cell migration	29	75	162	3.95	1.18
molecular_function	GO:0000977	RNA polymerase II regulatory region sequence-specific DNA binding	28	28	162	10.21	1.17
biological_process	GO:0030513	positive regulation of BMP signaling pathway	28	28	162	10.21	1.17
biological_process	GO:0031647	regulation of protein stability	28	28	162	10.21	1.17
biological_process	GO:0045599	negative regulation of fat cell differentiation	28	30	162	9.53	1.16
biological_process	GO:0035116	embryonic hindlimb morphogenesis	28	32	162	8.94	1.16
biological_process	GO:0045596	negative regulation of cell differentiation	28	32	162	8.94	1.16
biological_process	GO:0002053	positive regulation of mesenchymal cell proliferation	28	36	162	7.94	1.16
biological_process	GO:0007219	Notch signaling pathway	28	46	162	6.22	1.16
biological_process	GO:0042593	glucose homeostasis	28	71	162	4.03	1.15
molecular_function	GO:0000979	RNA polymerase II core promoter sequence-specific DNA binding	27	27	162	10.21	1.12
biological_process	GO:0035195	gene silencing by miRNA	27	27	162	10.21	1.12
cellular_component	GO:0016604	nuclear body	27	36	162	7.66	1.12
biological_process	GO:0032760	positive regulation of tumor necrosis factor production	27	36	162	7.66	1.12
biological_process	GO:0048146	positive regulation of fibroblast proliferation	27	42	162	6.57	1.12
cellular_component	GO:0014069	postsynaptic density	28	117	162	2.44	1.12
biological_process	GO:0007605	sensory perception of sound	28	119	162	2.4	1.12
cellular_component	GO:0016324	apical plasma membrane	29	219	162	1.35	1.12
biological_process	GO:0000902	cell morphogenesis	27	60	162	4.6	1.11
biological_process	GO:0031175	neuron projection development	27	85	162	3.24	1.1
cellular_component	GO:0005938	cell cortex	27	86	162	3.21	1.1
molecular_function	GO:0000978	RNA polymerase II core promoter proximal region sequence-specific DNA binding	26	26	162	10.21	1.08
biological_process	GO:0006417	regulation of translation	26	26	162	10.21	1.08
biological_process	GO:0048663	neuron fate commitment	26	28	162	9.49	1.08
molecular_function	GO:0001085	RNA polymerase II transcription factor binding	26	29	162	9.16	1.08
biological_process	GO:0030901	midbrain development	26	30	162	8.85	1.08
biological_process	GO:0001944	vasculature development	26	33	162	8.05	1.08
biological_process	GO:0032755	positive regulation of interleukin-6 production	26	36	162	7.38	1.08
biological_process	GO:0071363	cellular response to growth factor stimulus	26	40	162	6.64	1.08
biological_process	GO:0030218	erythrocyte differentiation	26	40	162	6.64	1.08
biological_process	GO:0001503	ossification	26	42	162	6.32	1.08
biological_process	GO:0071230	cellular response to amino acid stimulus	27	114	162	2.42	1.08
biological_process	GO:0031398	positive regulation of protein ubiquitination	26	43	162	6.18	1.07
biological_process	GO:0008584	male gonad development	26	50	162	5.31	1.07
biological_process	GO:0007368	determination of left/right symmetry	26	50	162	5.31	1.07
biological_process	GO:0001938	positive regulation of endothelial cell proliferation	26	52	162	5.11	1.07
biological_process	GO:0007417	central nervous system development	26	53	162	5.01	1.07
biological_process	GO:0050728	negative regulation of inflammatory response	26	55	162	4.83	1.07
molecular_function	GO:0004871	signal transducer activity	26	89	162	2.98	1.05
molecular_function	GO:0070888	E-box binding	25	25	162	10.21	1.04
molecular_function	GO:0001102	RNA polymerase II activating transcription factor binding	25	26	162	9.82	1.04
molecular_function	GO:0030331	estrogen receptor binding	25	31	162	8.24	1.04
biological_process	GO:0009888	tissue development	25	32	162	7.98	1.04
biological_process	GO:0001707	mesoderm formation	25	32	162	7.98	1.04
biological_process	GO:0021766	hippocampus development	25	37	162	6.9	1.04
biological_process	GO:0030178	negative regulation of Wnt receptor signaling pathway	25	45	162	5.67	1.03
biological_process	GO:0000082	G1/S transition of mitotic cell cycle	25	48	162	5.32	1.03
biological_process	GO:0048839	inner ear development	25	52	162	4.91	1.03
biological_process	GO:0018108	peptidyl-tyrosine phosphorylation	25	60	162	4.26	1.03
biological_process	GO:0030198	extracellular matrix organization	25	88	162	2.9	1.01
molecular_function	GO:0004872	receptor activity	25	94	162	2.72	1.01
molecular_function	GO:0031490	chromatin DNA binding	24	25	162	9.81	1
molecular_function	GO:0070491	repressing transcription factor binding	24	25	162	9.81	1
biological_process	GO:0001837	epithelial to mesenchymal transition	24	26	162	9.43	1
biological_process	GO:0001657	ureteric bud development	24	29	162	8.45	1
biological_process	GO:0048469	cell maturation	24	38	162	6.45	0.99
biological_process	GO:0045740	positive regulation of DNA replication	24	43	162	5.7	0.99
biological_process	GO:0006461	protein complex assembly	24	53	162	4.63	0.99
molecular_function	GO:0005509	calcium ion binding	25	154	162	1.66	0.99
biological_process	GO:0051607	defense response to virus	24	65	162	3.77	0.98
biological_process	GO:0007243	intracellular protein kinase cascade	24	71	162	3.45	0.98
biological_process	GO:0051291	protein heterooligomerization	24	74	162	3.31	0.98
molecular_function	GO:0008201	heparin binding	24	87	162	2.82	0.97
biological_process	GO:0007186	G-protein coupled receptor signaling pathway	37	1432	162	0.26	0.97
molecular_function	GO:0004879	ligand-activated sequence-specific DNA binding RNA polymerase II transcription factor activity	23	23	162	10.21	0.96
biological_process	GO:0030522	intracellular receptor mediated signaling pathway	23	24	162	9.79	0.96
molecular_function	GO:0050681	androgen receptor binding	23	25	162	9.4	0.96
biological_process	GO:0043388	positive regulation of DNA binding	23	25	162	9.4	0.96
biological_process	GO:0043392	negative regulation of DNA binding	23	26	162	9.04	0.96
biological_process	GO:0048701	embryonic cranial skeleton morphogenesis	23	28	162	8.39	0.96
biological_process	GO:0060412	ventricular septum morphogenesis	23	29	162	8.1	0.96
biological_process	GO:0045787	positive regulation of cell cycle	23	29	162	8.1	0.96
biological_process	GO:0048538	thymus development	23	34	162	6.91	0.95
biological_process	GO:0048754	branching morphogenesis of a tube	23	35	162	6.71	0.95
biological_process	GO:0045444	fat cell differentiation	23	35	162	6.71	0.95
biological_process	GO:0030855	epithelial cell differentiation	23	36	162	6.53	0.95
biological_process	GO:0021987	cerebral cortex development	23	38	162	6.18	0.95
biological_process	GO:0048706	embryonic skeletal system development	23	39	162	6.02	0.95
molecular_function	GO:0016301	kinase activity	23	40	162	5.87	0.95
biological_process	GO:0001569	patterning of blood vessels	23	40	162	5.87	0.95
biological_process	GO:0042552	myelination	23	47	162	5	0.95
biological_process	GO:0045860	positive regulation of protein kinase activity	23	48	162	4.89	0.95
biological_process	GO:0006469	negative regulation of protein kinase activity	23	50	162	4.7	0.95
biological_process	GO:0042060	wound healing	23	53	162	4.43	0.95
cellular_component	GO:0016323	basolateral plasma membrane	24	138	162	1.78	0.95
cellular_component	GO:0005901	caveola	23	64	162	3.67	0.94
biological_process	GO:0006874	cellular calcium ion homeostasis	23	74	162	3.17	0.94
cellular_component	GO:0045202	synapse	24	162	162	1.51	0.94
cellular_component	GO:0005925	focal adhesion	23	101	162	2.33	0.93
biological_process	GO:0051260	protein homooligomerization	23	106	162	2.22	0.93
biological_process	GO:0007204	elevation of cytosolic calcium ion concentration	23	107	162	2.2	0.93
biological_process	GO:0010718	positive regulation of epithelial to mesenchymal transition	22	22	162	10.21	0.92
biological_process	GO:0010862	positive regulation of pathway-restricted SMAD protein phosphorylation	22	24	162	9.36	0.92
molecular_function	GO:0051059	NF-kappaB binding	22	26	162	8.64	0.91
biological_process	GO:0045595	regulation of cell differentiation	22	26	162	8.64	0.91
molecular_function	GO:0003712	transcription cofactor activity	22	27	162	8.32	0.91
biological_process	GO:0035115	embryonic forelimb morphogenesis	22	28	162	8.03	0.91
biological_process	GO:0071407	cellular response to organic cyclic compound	22	29	162	7.75	0.91
biological_process	GO:0031069	hair follicle morphogenesis	22	30	162	7.49	0.91
biological_process	GO:0001974	blood vessel remodeling	22	35	162	6.42	0.91
biological_process	GO:0032436	positive regulation of proteasomal ubiquitin-dependent protein catabolic process	22	35	162	6.42	0.91
molecular_function	GO:0035064	methylated histone residue binding	22	36	162	6.24	0.91
biological_process	GO:0060548	negative regulation of cell death	22	37	162	6.07	0.91
biological_process	GO:0009749	response to glucose stimulus	22	41	162	5.48	0.91
biological_process	GO:0008286	insulin receptor signaling pathway	22	42	162	5.35	0.91
biological_process	GO:0043525	positive regulation of neuron apoptotic process	22	49	162	4.59	0.91
biological_process	GO:0006816	calcium ion transport	22	88	162	2.55	0.89
molecular_function	GO:0001105	RNA polymerase II transcription coactivator activity	21	21	162	10.21	0.87
molecular_function	GO:0043425	bHLH transcription factor binding	21	21	162	10.21	0.87
biological_process	GO:0000381	regulation of alternative mRNA splicing, via spliceosome	21	21	162	10.21	0.87
biological_process	GO:0021983	pituitary gland development	21	21	162	10.21	0.87
molecular_function	GO:0046966	thyroid hormone receptor binding	21	24	162	8.94	0.87
biological_process	GO:0048863	stem cell differentiation	21	25	162	8.58	0.87
biological_process	GO:0001892	embryonic placenta development	21	26	162	8.25	0.87
biological_process	GO:0002062	chondrocyte differentiation	21	27	162	7.94	0.87
biological_process	GO:0030501	positive regulation of bone mineralization	21	28	162	7.66	0.87
biological_process	GO:0021915	neural tube development	21	31	162	6.92	0.87
biological_process	GO:0043507	positive regulation of JUN kinase activity	21	31	162	6.92	0.87
biological_process	GO:0033077	T cell differentiation in thymus	21	33	162	6.5	0.87
biological_process	GO:0043280	positive regulation of cysteine-type endopeptidase activity involved in apoptotic process	21	33	162	6.5	0.87
biological_process	GO:0043627	response to estrogen stimulus	21	35	162	6.13	0.87
biological_process	GO:0048286	lung alveolus development	21	37	162	5.8	0.87
biological_process	GO:0030890	positive regulation of B cell proliferation	21	39	162	5.5	0.87
biological_process	GO:0014068	positive regulation of phosphatidylinositol 3-kinase cascade	21	39	162	5.5	0.87
biological_process	GO:0030183	B cell differentiation	21	39	162	5.5	0.87
biological_process	GO:0001942	hair follicle development	21	43	162	4.99	0.87
biological_process	GO:0032869	cellular response to insulin stimulus	21	44	162	4.88	0.87
biological_process	GO:0048705	skeletal system morphogenesis	21	46	162	4.66	0.87
biological_process	GO:0007224	smoothened signaling pathway	21	47	162	4.56	0.86
biological_process	GO:0043588	skin development	21	48	162	4.47	0.86
molecular_function	GO:0004713	protein tyrosine kinase activity	21	53	162	4.05	0.86
biological_process	GO:0006950	response to stress	21	69	162	3.11	0.86
biological_process	GO:0007626	locomotory behavior	21	82	162	2.62	0.85
biological_process	GO:0016337	cell-cell adhesion	21	85	162	2.52	0.85
biological_process	GO:0031648	protein destabilization	20	20	162	10.21	0.83
molecular_function	GO:0033613	activating transcription factor binding	20	21	162	9.73	0.83
molecular_function	GO:0001047	core promoter binding	20	22	162	9.29	0.83
molecular_function	GO:0016922	ligand-dependent nuclear receptor binding	20	22	162	9.29	0.83
cellular_component	GO:0000792	heterochromatin	20	25	162	8.17	0.83
biological_process	GO:0045931	positive regulation of mitotic cell cycle	20	27	162	7.57	0.83
biological_process	GO:0007569	cell aging	20	27	162	7.57	0.83
biological_process	GO:0050729	positive regulation of inflammatory response	20	32	162	6.38	0.83
biological_process	GO:0043966	histone H3 acetylation	20	40	162	5.11	0.83
biological_process	GO:0006006	glucose metabolic process	20	41	162	4.98	0.83
biological_process	GO:0043406	positive regulation of MAP kinase activity	20	42	162	4.86	0.83
cellular_component	GO:0005764	lysosome	21	153	162	1.4	0.83
biological_process	GO:0042102	positive regulation of T cell proliferation	20	46	162	4.44	0.82
biological_process	GO:0043161	proteasomal ubiquitin-dependent protein catabolic process	20	51	162	4.01	0.82
biological_process	GO:0000209	protein polyubiquitination	20	58	162	3.52	0.82
biological_process	GO:0000187	activation of MAPK activity	20	65	162	3.14	0.82
biological_process	GO:0035556	intracellular signal transduction	20	67	162	3.05	0.82
molecular_function	GO:0002020	protease binding	20	70	162	2.92	0.82
cellular_component	GO:0045177	apical part of cell	20	93	162	2.2	0.81
cellular_component	GO:0031965	nuclear membrane	20	93	162	2.2	0.81
cellular_component	GO:0015630	microtubule cytoskeleton	20	116	162	1.76	0.8
biological_process	GO:0030902	hindbrain development	19	20	162	9.7	0.79
biological_process	GO:0048557	embryonic digestive tract morphogenesis	19	20	162	9.7	0.79
biological_process	GO:0060045	positive regulation of cardiac muscle cell proliferation	19	20	162	9.7	0.79
biological_process	GO:0090190	positive regulation of branching involved in ureteric bud morphogenesis	19	22	162	8.82	0.79
biological_process	GO:0032091	negative regulation of protein binding	19	26	162	7.46	0.79
molecular_function	GO:0017147	Wnt-protein binding	19	27	162	7.19	0.79
biological_process	GO:0045600	positive regulation of fat cell differentiation	19	27	162	7.19	0.79
biological_process	GO:0031663	lipopolysaccharide-mediated signaling pathway	19	27	162	7.19	0.79
biological_process	GO:0045840	positive regulation of mitosis	19	28	162	6.93	0.79
biological_process	GO:0048536	spleen development	19	30	162	6.47	0.79
biological_process	GO:0060325	face morphogenesis	19	31	162	6.26	0.79
biological_process	GO:0001755	neural crest cell migration	19	33	162	5.88	0.79
biological_process	GO:0007281	germ cell development	19	34	162	5.71	0.79
biological_process	GO:0045786	negative regulation of cell cycle	19	34	162	5.71	0.79
biological_process	GO:0001890	placenta development	19	36	162	5.39	0.79
biological_process	GO:0032092	positive regulation of protein binding	19	38	162	5.11	0.78
molecular_function	GO:0043621	protein self-association	19	41	162	4.73	0.78
biological_process	GO:0008203	cholesterol metabolic process	19	47	162	4.13	0.78
cellular_component	GO:0005819	spindle	19	57	162	3.4	0.78
biological_process	GO:0042742	defense response to bacterium	19	61	162	3.18	0.78
biological_process	GO:0007166	cell surface receptor signaling pathway	19	70	162	2.77	0.77
cellular_component	GO:0030141	secretory granule	19	92	162	2.11	0.77
biological_process	GO:0006200	ATP catabolic process	19	105	162	1.85	0.76
biological_process	GO:0008152	metabolic process	21	393	162	0.55	0.76
cellular_component	GO:0016021	integral to membrane	29	1468	162	0.2	0.76
biological_process	GO:0023019	signal transduction involved in regulation of gene expression	18	18	162	10.21	0.75
biological_process	GO:0043484	regulation of RNA splicing	18	18	162	10.21	0.75
biological_process	GO:0006367	transcription initiation from RNA polymerase II promoter	18	19	162	9.68	0.75
molecular_function	GO:0042813	Wnt-activated receptor activity	18	20	162	9.19	0.75
biological_process	GO:0030521	androgen receptor signaling pathway	18	20	162	9.19	0.75
biological_process	GO:0001708	cell fate specification	18	20	162	9.19	0.75
biological_process	GO:0048646	anatomical structure formation involved in morphogenesis	18	21	162	8.76	0.75
biological_process	GO:0008406	gonad development	18	22	162	8.36	0.75
biological_process	GO:0060349	bone morphogenesis	18	22	162	8.36	0.75
biological_process	GO:0048468	cell development	18	23	162	7.99	0.75
biological_process	GO:0031018	endocrine pancreas development	18	24	162	7.66	0.75
biological_process	GO:0042474	middle ear morphogenesis	18	24	162	7.66	0.75
biological_process	GO:0034504	protein localization to nucleus	18	27	162	6.81	0.75
biological_process	GO:0048514	blood vessel morphogenesis	18	28	162	6.57	0.75
biological_process	GO:0001656	metanephros development	18	28	162	6.57	0.75
biological_process	GO:0032720	negative regulation of tumor necrosis factor production	18	29	162	6.34	0.75
biological_process	GO:0043491	protein kinase B signaling cascade	18	29	162	6.34	0.75
biological_process	GO:0030879	mammary gland development	18	31	162	5.93	0.75
biological_process	GO:0048589	developmental growth	18	31	162	5.93	0.75
cellular_component	GO:0016592	mediator complex	18	32	162	5.75	0.75
biological_process	GO:0045429	positive regulation of nitric oxide biosynthetic process	18	32	162	5.75	0.75
biological_process	GO:0040018	positive regulation of multicellular organism growth	18	33	162	5.57	0.74
biological_process	GO:0030217	T cell differentiation	18	33	162	5.57	0.74
biological_process	GO:0018107	peptidyl-threonine phosphorylation	18	34	162	5.41	0.74
biological_process	GO:0048666	neuron development	18	35	162	5.25	0.74
biological_process	GO:0032729	positive regulation of interferon-gamma production	18	37	162	4.97	0.74
biological_process	GO:0001541	ovarian follicle development	18	42	162	4.38	0.74
biological_process	GO:0006302	double-strand break repair	18	43	162	4.28	0.74
biological_process	GO:0032526	response to retinoic acid	18	46	162	4	0.74
biological_process	GO:0006955	immune response	18	46	162	4	0.74
biological_process	GO:0070482	response to oxygen levels	18	48	162	3.83	0.74
biological_process	GO:0042632	cholesterol homeostasis	18	48	162	3.83	0.74
biological_process	GO:0071241	cellular response to inorganic substance	18	48	162	3.83	0.74
molecular_function	GO:0003697	single-stranded DNA binding	18	51	162	3.61	0.74
biological_process	GO:0006281	DNA repair	18	78	162	2.36	0.73
biological_process	GO:0007155	cell adhesion	18	102	162	1.8	0.72
cellular_component	GO:0005769	early endosome	18	110	162	1.67	0.72
cellular_component	GO:0031410	cytoplasmic vesicle	18	110	162	1.67	0.72
molecular_function	GO:0046965	retinoid X receptor binding	17	17	162	10.21	0.71
molecular_function	GO:0035035	histone acetyltransferase binding	17	18	162	9.65	0.71
molecular_function	GO:0000976	transcription regulatory region sequence-specific DNA binding	17	19	162	9.14	0.71
biological_process	GO:0070555	response to interleukin-1	17	19	162	9.14	0.71
molecular_function	GO:0070412	R-SMAD binding	17	20	162	8.68	0.71
molecular_function	GO:0071837	HMG box domain binding	17	20	162	8.68	0.71
biological_process	GO:0032757	positive regulation of interleukin-8 production	17	20	162	8.68	0.71
cellular_component	GO:0000118	histone deacetylase complex	17	21	162	8.27	0.71
biological_process	GO:0048485	sympathetic nervous system development	17	21	162	8.27	0.71
biological_process	GO:0010595	positive regulation of endothelial cell migration	17	24	162	7.24	0.71
biological_process	GO:0031016	pancreas development	17	25	162	6.95	0.71
biological_process	GO:0007257	activation of JUN kinase activity	17	27	162	6.43	0.7
biological_process	GO:0046326	positive regulation of glucose import	17	29	162	5.99	0.7
biological_process	GO:0001932	regulation of protein phosphorylation	17	30	162	5.79	0.7
biological_process	GO:0050852	T cell receptor signaling pathway	17	30	162	5.79	0.7
biological_process	GO:0022008	neurogenesis	17	31	162	5.6	0.7
biological_process	GO:0042327	positive regulation of phosphorylation	17	31	162	5.6	0.7
biological_process	GO:0001702	gastrulation with mouth forming second	17	32	162	5.43	0.7
biological_process	GO:0010942	positive regulation of cell death	17	32	162	5.43	0.7
biological_process	GO:0045732	positive regulation of protein catabolic process	17	37	162	4.69	0.7
biological_process	GO:0008544	epidermis development	17	38	162	4.57	0.7
biological_process	GO:0007611	learning or memory	17	41	162	4.24	0.7
biological_process	GO:0034613	cellular protein localization	17	44	162	3.95	0.7
biological_process	GO:0043085	positive regulation of catalytic activity	17	48	162	3.62	0.7
biological_process	GO:0016525	negative regulation of angiogenesis	17	50	162	3.47	0.7
cellular_component	GO:0043204	perikaryon	17	64	162	2.71	0.69
biological_process	GO:0008104	protein localization	17	65	162	2.67	0.69
cellular_component	GO:0030018	Z disc	17	84	162	2.07	0.69
cellular_component	GO:0005635	nuclear envelope	17	87	162	2	0.69
cellular_component	GO:0043197	dendritic spine	17	89	162	1.95	0.69
biological_process	GO:0006446	regulation of translational initiation	16	16	162	10.21	0.67
biological_process	GO:0006306	DNA methylation	16	16	162	10.21	0.67
biological_process	GO:0048596	embryonic camera-type eye morphogenesis	16	17	162	9.61	0.67
biological_process	GO:0042476	odontogenesis	16	18	162	9.08	0.67
biological_process	GO:0060395	SMAD protein signal transduction	16	18	162	9.08	0.67
biological_process	GO:0051145	smooth muscle cell differentiation	16	18	162	9.08	0.67
biological_process	GO:0030878	thyroid gland development	16	19	162	8.6	0.67
biological_process	GO:0032967	positive regulation of collagen biosynthetic process	16	20	162	8.17	0.67
biological_process	GO:0030511	positive regulation of transforming growth factor beta receptor signaling pathway	16	20	162	8.17	0.67
biological_process	GO:0032735	positive regulation of interleukin-12 production	16	20	162	8.17	0.67
cellular_component	GO:0015629	actin cytoskeleton	17	135	162	1.29	0.67
biological_process	GO:0009880	embryonic pattern specification	16	21	162	7.78	0.66
biological_process	GO:0055007	cardiac muscle cell differentiation	16	21	162	7.78	0.66
biological_process	GO:0035162	embryonic hemopoiesis	16	21	162	7.78	0.66
biological_process	GO:0030099	myeloid cell differentiation	16	21	162	7.78	0.66
biological_process	GO:0035050	embryonic heart tube development	16	21	162	7.78	0.66
biological_process	GO:0016571	histone methylation	16	23	162	7.11	0.66
molecular_function	GO:0005109	frizzled binding	16	24	162	6.81	0.66
biological_process	GO:0007422	peripheral nervous system development	16	24	162	6.81	0.66
biological_process	GO:0007498	mesoderm development	16	24	162	6.81	0.66
biological_process	GO:0030177	positive regulation of Wnt receptor signaling pathway	16	24	162	6.81	0.66
biological_process	GO:0009954	proximal/distal pattern formation	16	24	162	6.81	0.66
biological_process	GO:0034644	cellular response to UV	16	26	162	6.29	0.66
biological_process	GO:0050727	regulation of inflammatory response	16	28	162	5.84	0.66
biological_process	GO:0030199	collagen fibril organization	16	34	162	4.81	0.66
cellular_component	GO:0000932	cytoplasmic mRNA processing body	16	35	162	4.67	0.66
molecular_function	GO:0043130	ubiquitin binding	16	36	162	4.54	0.66
biological_process	GO:0007566	embryo implantation	16	38	162	4.3	0.66
biological_process	GO:0008219	cell death	16	41	162	3.99	0.66
biological_process	GO:0030216	keratinocyte differentiation	16	47	162	3.48	0.66
molecular_function	GO:0005080	protein kinase C binding	16	49	162	3.34	0.66
biological_process	GO:0008217	regulation of blood pressure	16	50	162	3.27	0.66
biological_process	GO:0060041	retina development in camera-type eye	16	53	162	3.08	0.66
biological_process	GO:0007286	spermatid development	16	58	162	2.82	0.65
biological_process	GO:0019233	sensory perception of pain	16	60	162	2.72	0.65
cellular_component	GO:0071013	catalytic step 2 spliceosome	16	79	162	2.07	0.65
biological_process	GO:0008360	regulation of cell shape	16	80	162	2.04	0.65
cellular_component	GO:0030426	growth cone	16	81	162	2.02	0.65
cellular_component	GO:0005770	late endosome	16	82	162	1.99	0.65
molecular_function	GO:0008144	drug binding	16	85	162	1.92	0.65
molecular_function	GO:0008017	microtubule binding	16	89	162	1.84	0.65
cellular_component	GO:0030027	lamellipodium	16	96	162	1.7	0.64
cellular_component	GO:0005789	endoplasmic reticulum membrane	16	125	162	1.31	0.64
molecular_function	GO:0001104	RNA polymerase II transcription cofactor activity	15	15	162	10.21	0.62
molecular_function	GO:0000987	core promoter proximal region sequence-specific DNA binding	15	15	162	10.21	0.62
biological_process	GO:0006349	regulation of gene expression by genetic imprinting	15	15	162	10.21	0.62
biological_process	GO:0009950	dorsal/ventral axis specification	15	15	162	10.21	0.62
biological_process	GO:0048709	oligodendrocyte differentiation	15	16	162	9.58	0.62
biological_process	GO:0002076	osteoblast development	15	17	162	9.01	0.62
cellular_component	GO:0005720	nuclear heterochromatin	15	18	162	8.51	0.62
biological_process	GO:0045747	positive regulation of Notch signaling pathway	15	18	162	8.51	0.62
biological_process	GO:0016573	histone acetylation	15	18	162	8.51	0.62
biological_process	GO:0033209	tumor necrosis factor-mediated signaling pathway	15	20	162	7.66	0.62
biological_process	GO:0002052	positive regulation of neuroblast proliferation	15	20	162	7.66	0.62
biological_process	GO:0048844	artery morphogenesis	15	21	162	7.3	0.62
biological_process	GO:0090103	cochlea morphogenesis	15	21	162	7.3	0.62
biological_process	GO:0042177	negative regulation of protein catabolic process	15	22	162	6.96	0.62
biological_process	GO:0045664	regulation of neuron differentiation	15	23	162	6.66	0.62
biological_process	GO:0010332	response to gamma radiation	15	23	162	6.66	0.62
biological_process	GO:0023014	signal transduction by phosphorylation	15	24	162	6.38	0.62
biological_process	GO:0007249	I-kappaB kinase/NF-kappaB cascade	15	24	162	6.38	0.62
molecular_function	GO:0003730	mRNA 3'-UTR binding	15	25	162	6.13	0.62
biological_process	GO:0035108	limb morphogenesis	15	27	162	5.67	0.62
biological_process	GO:0032355	response to estradiol stimulus	15	32	162	4.79	0.62
biological_process	GO:0032868	response to insulin stimulus	15	32	162	4.79	0.62
biological_process	GO:0048662	negative regulation of smooth muscle cell proliferation	15	34	162	4.51	0.62
biological_process	GO:0043407	negative regulation of MAP kinase activity	15	35	162	4.38	0.62
biological_process	GO:0045785	positive regulation of cell adhesion	15	36	162	4.26	0.62
biological_process	GO:0030819	positive regulation of cAMP biosynthetic process	15	43	162	3.56	0.62
molecular_function	GO:0046983	protein dimerization activity	15	46	162	3.33	0.62
biological_process	GO:0051259	protein oligomerization	15	46	162	3.33	0.62
biological_process	GO:0034097	response to cytokine stimulus	15	49	162	3.13	0.62
biological_process	GO:0008344	adult locomotory behavior	15	53	162	2.89	0.61
biological_process	GO:0009615	response to virus	15	53	162	2.89	0.61
biological_process	GO:0043086	negative regulation of catalytic activity	15	55	162	2.79	0.61
biological_process	GO:0016311	dephosphorylation	15	70	162	2.19	0.61
biological_process	GO:0006470	protein dephosphorylation	15	82	162	1.87	0.61
molecular_function	GO:0000287	magnesium ion binding	15	96	162	1.6	0.6
cellular_component	GO:0005911	cell-cell junction	15	101	162	1.52	0.6
cellular_component	GO:0005777	peroxisome	15	107	162	1.43	0.6
cellular_component	GO:0005768	endosome	15	134	162	1.14	0.6
molecular_function	GO:0000988	protein binding transcription factor activity	14	14	162	10.21	0.58
molecular_function	GO:0001158	enhancer sequence-specific DNA binding	14	14	162	10.21	0.58
molecular_function	GO:0000980	RNA polymerase II distal enhancer sequence-specific DNA binding	14	14	162	10.21	0.58
biological_process	GO:0030518	intracellular steroid hormone receptor signaling pathway	14	15	162	9.53	0.58
biological_process	GO:0048384	retinoic acid receptor signaling pathway	14	15	162	9.53	0.58
molecular_function	GO:0001106	RNA polymerase II transcription corepressor activity	14	16	162	8.94	0.58
biological_process	GO:0045638	negative regulation of myeloid cell differentiation	14	16	162	8.94	0.58
biological_process	GO:0071158	positive regulation of cell cycle arrest	14	16	162	8.94	0.58
biological_process	GO:0060038	cardiac muscle cell proliferation	14	16	162	8.94	0.58
biological_process	GO:0048484	enteric nervous system development	14	17	162	8.41	0.58
biological_process	GO:0009948	anterior/posterior axis specification	14	17	162	8.41	0.58
biological_process	GO:0014003	oligodendrocyte development	14	18	162	7.94	0.58
biological_process	GO:0009653	anatomical structure morphogenesis	14	18	162	7.94	0.58
biological_process	GO:0021537	telencephalon development	14	19	162	7.53	0.58
biological_process	GO:0010001	glial cell differentiation	14	20	162	7.15	0.58
biological_process	GO:0042771	intrinsic apoptotic signaling pathway in response to DNA damage by p53 class mediator	14	25	162	5.72	0.58
molecular_function	GO:0003727	single-stranded RNA binding	14	26	162	5.5	0.58
biological_process	GO:0050796	regulation of insulin secretion	14	26	162	5.5	0.58
cellular_component	GO:0071339	MLL1 complex	14	27	162	5.3	0.58
biological_process	GO:0007595	lactation	14	27	162	5.3	0.58
biological_process	GO:0042542	response to hydrogen peroxide	14	28	162	5.11	0.58
biological_process	GO:0007517	muscle organ development	14	29	162	4.93	0.58
biological_process	GO:0071310	cellular response to organic substance	14	29	162	4.93	0.58
biological_process	GO:0055010	ventricular cardiac muscle tissue morphogenesis	14	30	162	4.77	0.58
biological_process	GO:0007623	circadian rhythm	14	31	162	4.61	0.58
biological_process	GO:0007254	JNK cascade	14	33	162	4.33	0.58
molecular_function	GO:0051219	phosphoprotein binding	14	39	162	3.67	0.58
biological_process	GO:0007160	cell-matrix adhesion	14	42	162	3.4	0.58
molecular_function	GO:0001664	G-protein coupled receptor binding	14	49	162	2.92	0.57
biological_process	GO:0007613	memory	14	56	162	2.55	0.57
biological_process	GO:0006511	ubiquitin-dependent protein catabolic process	14	57	162	2.51	0.57
molecular_function	GO:0016887	ATPase activity	14	58	162	2.47	0.57
cellular_component	GO:0016023	cytoplasmic membrane-bounded vesicle	14	66	162	2.17	0.57
molecular_function	GO:0005178	integrin binding	14	68	162	2.1	0.57
biological_process	GO:0050790	regulation of catalytic activity	14	78	162	1.83	0.57
biological_process	GO:0030036	actin cytoskeleton organization	14	92	162	1.55	0.56
molecular_function	GO:0042975	peroxisome proliferator activated receptor binding	13	13	162	10.21	0.54
molecular_function	GO:0042974	retinoic acid receptor binding	13	13	162	10.21	0.54
cellular_component	GO:0032993	protein-DNA complex	13	13	162	10.21	0.54
biological_process	GO:0032922	circadian regulation of gene expression	13	13	162	10.21	0.54
biological_process	GO:0060766	negative regulation of androgen receptor signaling pathway	13	13	162	10.21	0.54
biological_process	GO:0001829	trophectodermal cell differentiation	13	14	162	9.49	0.54
biological_process	GO:0060389	pathway-restricted SMAD protein phosphorylation	13	14	162	9.49	0.54
biological_process	GO:0060425	lung morphogenesis	13	15	162	8.85	0.54
biological_process	GO:0017015	regulation of transforming growth factor beta receptor signaling pathway	13	16	162	8.3	0.54
biological_process	GO:0071560	cellular response to transforming growth factor beta stimulus	13	16	162	8.3	0.54
biological_process	GO:0045778	positive regulation of ossification	13	16	162	8.3	0.54
biological_process	GO:0016575	histone deacetylation	13	16	162	8.3	0.54
biological_process	GO:0030539	male genitalia development	13	17	162	7.81	0.54
biological_process	GO:0021904	dorsal/ventral neural tube patterning	13	17	162	7.81	0.54
biological_process	GO:0001502	cartilage condensation	13	17	162	7.81	0.54
biological_process	GO:0002089	lens morphogenesis in camera-type eye	13	17	162	7.81	0.54
biological_process	GO:0048568	embryonic organ development	13	18	162	7.38	0.54
biological_process	GO:0045648	positive regulation of erythrocyte differentiation	13	18	162	7.38	0.54
biological_process	GO:0045672	positive regulation of osteoclast differentiation	13	19	162	6.99	0.54
biological_process	GO:0002040	sprouting angiogenesis	13	21	162	6.32	0.54
biological_process	GO:0007346	regulation of mitotic cell cycle	13	21	162	6.32	0.54
biological_process	GO:0043124	negative regulation of I-kappaB kinase/NF-kappaB cascade	13	21	162	6.32	0.54
biological_process	GO:0000060	protein import into nucleus, translocation	13	21	162	6.32	0.54
cellular_component	GO:0005844	polysome	13	22	162	6.04	0.54
biological_process	GO:0031397	negative regulation of protein ubiquitination	13	22	162	6.04	0.54
biological_process	GO:0048147	negative regulation of fibroblast proliferation	13	23	162	5.77	0.54
biological_process	GO:0021549	cerebellum development	13	23	162	5.77	0.54
biological_process	GO:0050769	positive regulation of neurogenesis	13	23	162	5.77	0.54
biological_process	GO:0001958	endochondral ossification	13	23	162	5.77	0.54
biological_process	GO:0030318	melanocyte differentiation	13	23	162	5.77	0.54
biological_process	GO:0035690	cellular response to drug	13	24	162	5.53	0.54
biological_process	GO:0046627	negative regulation of insulin receptor signaling pathway	13	24	162	5.53	0.54
biological_process	GO:0043523	regulation of neuron apoptotic process	13	25	162	5.31	0.54
biological_process	GO:0051496	positive regulation of stress fiber assembly	13	25	162	5.31	0.54
biological_process	GO:0007275	multicellular organismal development	13	25	162	5.31	0.54
biological_process	GO:0001654	eye development	13	27	162	4.92	0.54
cellular_component	GO:0010494	cytoplasmic stress granule	13	28	162	4.74	0.54
biological_process	GO:0009408	response to heat	13	31	162	4.28	0.54
cellular_component	GO:0043235	receptor complex	13	32	162	4.15	0.54
cellular_component	GO:0000151	ubiquitin ligase complex	13	33	162	4.02	0.54
biological_process	GO:0032024	positive regulation of insulin secretion	13	38	162	3.49	0.54
biological_process	GO:0043434	response to peptide hormone stimulus	13	38	162	3.49	0.54
cellular_component	GO:0009898	internal side of plasma membrane	13	39	162	3.4	0.54
biological_process	GO:0009411	response to UV	13	40	162	3.32	0.54
biological_process	GO:0007015	actin filament organization	13	40	162	3.32	0.54
biological_process	GO:0048812	neuron projection morphogenesis	13	42	162	3.16	0.53
biological_process	GO:0008542	visual learning	13	42	162	3.16	0.53
biological_process	GO:0030334	regulation of cell migration	13	46	162	2.89	0.53
molecular_function	GO:0001948	glycoprotein binding	13	48	162	2.77	0.53
biological_process	GO:0050830	defense response to Gram-positive bacterium	13	49	162	2.71	0.53
biological_process	GO:0016310	phosphorylation	13	56	162	2.37	0.53
biological_process	GO:0042384	cilium assembly	13	63	162	2.11	0.53
cellular_component	GO:0045211	postsynaptic membrane	13	72	162	1.84	0.53
cellular_component	GO:0005604	basement membrane	13	83	162	1.6	0.53
molecular_function	GO:0005525	GTP binding	13	103	162	1.29	0.52
biological_process	GO:0035066	positive regulation of histone acetylation	12	12	162	10.21	0.5
biological_process	GO:0043488	regulation of mRNA stability	12	12	162	10.21	0.5
biological_process	GO:0050767	regulation of neurogenesis	12	12	162	10.21	0.5
biological_process	GO:0043046	DNA methylation involved in gamete generation	12	12	162	10.21	0.5
molecular_function	GO:0070742	C2H2 zinc finger domain binding	12	13	162	9.43	0.5
biological_process	GO:0006978	DNA damage response, signal transduction by p53 class mediator resulting in transcription of p21 class mediator	12	13	162	9.43	0.5
biological_process	GO:0021527	spinal cord association neuron differentiation	12	13	162	9.43	0.5
biological_process	GO:0006337	nucleosome disassembly	12	13	162	9.43	0.5
biological_process	GO:0021954	central nervous system neuron development	12	14	162	8.76	0.5
biological_process	GO:0009798	axis specification	12	14	162	8.76	0.5
biological_process	GO:0060037	pharyngeal system development	12	14	162	8.76	0.5
biological_process	GO:0043393	regulation of protein binding	12	16	162	7.66	0.5
biological_process	GO:0035136	forelimb morphogenesis	12	16	162	7.66	0.5
biological_process	GO:0060612	adipose tissue development	12	16	162	7.66	0.5
biological_process	GO:0043330	response to exogenous dsRNA	12	16	162	7.66	0.5
cellular_component	GO:0005669	transcription factor TFIID complex	12	17	162	7.21	0.5
biological_process	GO:0048546	digestive tract morphogenesis	12	17	162	7.21	0.5
biological_process	GO:0045736	negative regulation of cyclin-dependent protein kinase activity	12	17	162	7.21	0.5
biological_process	GO:0030325	adrenal gland development	12	17	162	7.21	0.5
biological_process	GO:0048565	digestive tract development	12	17	162	7.21	0.5
biological_process	GO:0032332	positive regulation of chondrocyte differentiation	12	17	162	7.21	0.5
biological_process	GO:0060716	labyrinthine layer blood vessel development	12	18	162	6.81	0.5
biological_process	GO:0030279	negative regulation of ossification	12	18	162	6.81	0.5
biological_process	GO:0045880	positive regulation of smoothened signaling pathway	12	18	162	6.81	0.5
biological_process	GO:0046329	negative regulation of JNK cascade	12	19	162	6.45	0.5
biological_process	GO:0045879	negative regulation of smoothened signaling pathway	12	19	162	6.45	0.5
biological_process	GO:0060218	hematopoietic stem cell differentiation	12	19	162	6.45	0.5
biological_process	GO:0032715	negative regulation of interleukin-6 production	12	19	162	6.45	0.5
biological_process	GO:0006959	humoral immune response	12	19	162	6.45	0.5
biological_process	GO:0030316	osteoclast differentiation	12	21	162	5.84	0.5
biological_process	GO:0043967	histone H4 acetylation	12	21	162	5.84	0.5
biological_process	GO:0048535	lymph node development	12	21	162	5.84	0.5
biological_process	GO:0070371	ERK1 and ERK2 cascade	12	21	162	5.84	0.5
biological_process	GO:0071356	cellular response to tumor necrosis factor	12	21	162	5.84	0.5
molecular_function	GO:0003684	damaged DNA binding	12	22	162	5.57	0.5
cellular_component	GO:0044424	intracellular part	12	22	162	5.57	0.5
biological_process	GO:0032689	negative regulation of interferon-gamma production	12	22	162	5.57	0.5
cellular_component	GO:0035097	histone methyltransferase complex	12	23	162	5.33	0.5
biological_process	GO:0097190	apoptotic signaling pathway	12	23	162	5.33	0.5
biological_process	GO:0032147	activation of protein kinase activity	12	23	162	5.33	0.5
molecular_function	GO:0043027	cysteine-type endopeptidase inhibitor activity involved in apoptotic process	12	24	162	5.11	0.5
biological_process	GO:0045739	positive regulation of DNA repair	12	24	162	5.11	0.5
biological_process	GO:0043552	positive regulation of phosphatidylinositol 3-kinase activity	12	24	162	5.11	0.5
biological_process	GO:0001937	negative regulation of endothelial cell proliferation	12	24	162	5.11	0.5
biological_process	GO:0070534	protein K63-linked ubiquitination	12	24	162	5.11	0.5
biological_process	GO:0071456	cellular response to hypoxia	12	25	162	4.9	0.5
biological_process	GO:0030282	bone mineralization	12	26	162	4.71	0.5
molecular_function	GO:0005179	hormone activity	12	27	162	4.54	0.5
biological_process	GO:0008045	motor neuron axon guidance	12	27	162	4.54	0.5
biological_process	GO:0042221	response to chemical stimulus	12	28	162	4.38	0.5
biological_process	GO:0045087	innate immune response	12	29	162	4.23	0.5
biological_process	GO:0045776	negative regulation of blood pressure	12	30	162	4.09	0.5
biological_process	GO:0016049	cell growth	12	31	162	3.95	0.5
molecular_function	GO:0042169	SH2 domain binding	12	33	162	3.71	0.5
biological_process	GO:0050715	positive regulation of cytokine secretion	12	33	162	3.71	0.5
molecular_function	GO:0004843	ubiquitin-specific protease activity	12	42	162	2.92	0.49
biological_process	GO:0032880	regulation of protein localization	12	43	162	2.85	0.49
biological_process	GO:0043473	pigmentation	12	43	162	2.85	0.49
molecular_function	GO:0005516	calmodulin binding	12	44	162	2.79	0.49
cellular_component	GO:0000776	kinetochore	12	45	162	2.72	0.49
biological_process	GO:0042787	protein ubiquitination involved in ubiquitin-dependent protein catabolic process	12	46	162	2.66	0.49
cellular_component	GO:0031594	neuromuscular junction	12	47	162	2.61	0.49
cellular_component	GO:0030496	midbody	12	70	162	1.75	0.49
biological_process	GO:0006412	translation	12	82	162	1.49	0.49
biological_process	GO:0007268	synaptic transmission	12	102	162	1.2	0.48
molecular_function	GO:0070411	I-SMAD binding	11	11	162	10.21	0.46
biological_process	GO:0080111	DNA demethylation	11	11	162	10.21	0.46
biological_process	GO:0007223	Wnt receptor signaling pathway, calcium modulating pathway	11	11	162	10.21	0.46
biological_process	GO:0009048	dosage compensation by inactivation of X chromosome	11	11	162	10.21	0.46
biological_process	GO:0048617	embryonic foregut morphogenesis	11	11	162	10.21	0.46
biological_process	GO:0048255	mRNA stabilization	11	11	162	10.21	0.46
biological_process	GO:0048025	negative regulation of mRNA splicing, via spliceosome	11	11	162	10.21	0.46
biological_process	GO:0032968	positive regulation of transcription elongation from RNA polymerase II promoter	11	11	162	10.21	0.46
cellular_component	GO:0005719	nuclear euchromatin	11	12	162	9.36	0.46
biological_process	GO:0016578	histone deubiquitination	11	12	162	9.36	0.46
biological_process	GO:0043922	negative regulation by host of viral transcription	11	12	162	9.36	0.46
biological_process	GO:0032270	positive regulation of cellular protein metabolic process	11	12	162	9.36	0.46
biological_process	GO:0071285	cellular response to lithium ion	11	12	162	9.36	0.46
biological_process	GO:0006352	DNA-dependent transcription, initiation	11	12	162	9.36	0.46
biological_process	GO:0070498	interleukin-1-mediated signaling pathway	11	12	162	9.36	0.46
biological_process	GO:0060216	definitive hemopoiesis	11	12	162	9.36	0.46
molecular_function	GO:0001103	RNA polymerase II repressing transcription factor binding	11	13	162	8.64	0.46
molecular_function	GO:0004402	histone acetyltransferase activity	11	13	162	8.64	0.46
biological_process	GO:0032331	negative regulation of chondrocyte differentiation	11	13	162	8.64	0.46
biological_process	GO:0071542	dopaminergic neuron differentiation	11	13	162	8.64	0.46
biological_process	GO:0003148	outflow tract septum morphogenesis	11	13	162	8.64	0.46
biological_process	GO:0001655	urogenital system development	11	13	162	8.64	0.46
molecular_function	GO:0035259	glucocorticoid receptor binding	11	14	162	8.03	0.46
cellular_component	GO:0033276	transcription factor TFTC complex	11	14	162	8.03	0.46
biological_process	GO:0042523	positive regulation of tyrosine phosphorylation of Stat5 protein	11	14	162	8.03	0.46
biological_process	GO:0060979	vasculogenesis involved in coronary vascular morphogenesis	11	14	162	8.03	0.46
biological_process	GO:0031641	regulation of myelination	11	14	162	8.03	0.46
biological_process	GO:0002244	hematopoietic progenitor cell differentiation	11	14	162	8.03	0.46
biological_process	GO:0030111	regulation of Wnt receptor signaling pathway	11	14	162	8.03	0.46
molecular_function	GO:0042056	chemoattractant activity	11	15	162	7.49	0.46
biological_process	GO:0050768	negative regulation of neurogenesis	11	15	162	7.49	0.46
biological_process	GO:0048598	embryonic morphogenesis	11	15	162	7.49	0.46
biological_process	GO:0048714	positive regulation of oligodendrocyte differentiation	11	15	162	7.49	0.46
biological_process	GO:0001706	endoderm formation	11	15	162	7.49	0.46
biological_process	GO:0010800	positive regulation of peptidyl-threonine phosphorylation	11	15	162	7.49	0.46
biological_process	GO:0042346	positive regulation of NF-kappaB import into nucleus	11	15	162	7.49	0.46
biological_process	GO:0061298	retina vasculature development in camera-type eye	11	15	162	7.49	0.46
biological_process	GO:0003281	ventricular septum development	11	16	162	7.02	0.46
biological_process	GO:0048513	organ development	11	16	162	7.02	0.46
biological_process	GO:0016925	protein sumoylation	11	17	162	6.61	0.46
cellular_component	GO:0031519	PcG protein complex	11	18	162	6.24	0.46
biological_process	GO:0034612	response to tumor necrosis factor	11	18	162	6.24	0.46
biological_process	GO:0035137	hindlimb morphogenesis	11	18	162	6.24	0.46
biological_process	GO:0021522	spinal cord motor neuron differentiation	11	19	162	5.91	0.46
biological_process	GO:0048010	vascular endothelial growth factor receptor signaling pathway	11	19	162	5.91	0.46
biological_process	GO:0061098	positive regulation of protein tyrosine kinase activity	11	19	162	5.91	0.46
biological_process	GO:0036342	post-anal tail morphogenesis	11	19	162	5.91	0.46
biological_process	GO:0060348	bone development	11	19	162	5.91	0.46
biological_process	GO:0060749	mammary gland alveolus development	11	19	162	5.91	0.46
biological_process	GO:0042104	positive regulation of activated T cell proliferation	11	19	162	5.91	0.46
biological_process	GO:0007259	JAK-STAT cascade	11	21	162	5.35	0.46
biological_process	GO:0001816	cytokine production	11	23	162	4.89	0.46
biological_process	GO:0007369	gastrulation	11	23	162	4.89	0.46
biological_process	GO:0008016	regulation of heart contraction	11	23	162	4.89	0.46
biological_process	GO:0009987	cellular process	11	24	162	4.68	0.46
molecular_function	GO:0005506	iron ion binding	11	25	162	4.49	0.46
biological_process	GO:0034599	cellular response to oxidative stress	11	25	162	4.49	0.46
biological_process	GO:0071277	cellular response to calcium ion	11	25	162	4.49	0.46
biological_process	GO:0007049	cell cycle	11	25	162	4.49	0.46
biological_process	GO:0001824	blastocyst development	11	25	162	4.49	0.46
biological_process	GO:0001558	regulation of cell growth	11	26	162	4.32	0.46
biological_process	GO:0006913	nucleocytoplasmic transport	11	26	162	4.32	0.46
biological_process	GO:0000086	G2/M transition of mitotic cell cycle	11	27	162	4.16	0.45
biological_process	GO:0051928	positive regulation of calcium ion transport	11	29	162	3.87	0.45
biological_process	GO:0008306	associative learning	11	30	162	3.75	0.45
biological_process	GO:0006606	protein import into nucleus	11	30	162	3.75	0.45
biological_process	GO:0051924	regulation of calcium ion transport	11	31	162	3.62	0.45
biological_process	GO:0008543	fibroblast growth factor receptor signaling pathway	11	32	162	3.51	0.45
biological_process	GO:0042110	T cell activation	11	32	162	3.51	0.45
biological_process	GO:0019722	calcium-mediated signaling	11	33	162	3.4	0.45
biological_process	GO:0040014	regulation of multicellular organism growth	11	33	162	3.4	0.45
biological_process	GO:0030073	insulin secretion	11	34	162	3.3	0.45
molecular_function	GO:0020037	heme binding	11	35	162	3.21	0.45
biological_process	GO:0007610	behavior	11	36	162	3.12	0.45
biological_process	GO:0007189	adenylate cyclase-activating G-protein coupled receptor signaling pathway	11	37	162	3.04	0.45
biological_process	GO:0007005	mitochondrion organization	11	40	162	2.81	0.45
biological_process	GO:0009636	response to toxin	11	45	162	2.5	0.45
molecular_function	GO:0019900	kinase binding	11	50	162	2.25	0.45
cellular_component	GO:0042995	cell projection	11	54	162	2.08	0.45
molecular_function	GO:0019903	protein phosphatase binding	11	58	162	1.94	0.45
cellular_component	GO:0001669	acrosomal vesicle	11	62	162	1.81	0.45
cellular_component	GO:0000139	Golgi membrane	11	75	162	1.5	0.45
cellular_component	GO:0042383	sarcolemma	11	76	162	1.48	0.45
cellular_component	GO:0005802	trans-Golgi network	11	108	162	1.04	0.44
molecular_function	GO:0001071	nucleic acid binding transcription factor activity	10	10	162	10.21	0.42
molecular_function	GO:0070410	co-SMAD binding	10	10	162	10.21	0.42
biological_process	GO:0032793	positive regulation of CREB transcription factor activity	10	10	162	10.21	0.42
biological_process	GO:0072001	renal system development	10	10	162	10.21	0.42
biological_process	GO:0070935	3'-UTR-mediated mRNA stabilization	10	10	162	10.21	0.42
biological_process	GO:0003215	cardiac right ventricle morphogenesis	10	10	162	10.21	0.42
biological_process	GO:0048699	generation of neurons	10	10	162	10.21	0.42
biological_process	GO:0030520	intracellular estrogen receptor signaling pathway	10	10	162	10.21	0.42
molecular_function	GO:0001046	core promoter sequence-specific DNA binding	10	11	162	9.29	0.42
biological_process	GO:0045662	negative regulation of myoblast differentiation	10	11	162	9.29	0.42
biological_process	GO:0061036	positive regulation of cartilage development	10	11	162	9.29	0.42
molecular_function	GO:0048185	activin binding	10	12	162	8.51	0.42
molecular_function	GO:0070577	histone acetyl-lysine binding	10	12	162	8.51	0.42
biological_process	GO:0016568	chromatin modification	10	12	162	8.51	0.42
biological_process	GO:0050872	white fat cell differentiation	10	12	162	8.51	0.42
biological_process	GO:0042307	positive regulation of protein import into nucleus	10	12	162	8.51	0.42
biological_process	GO:0021542	dentate gyrus development	10	12	162	8.51	0.42
biological_process	GO:0071425	hematopoietic stem cell proliferation	10	12	162	8.51	0.42
biological_process	GO:0048715	negative regulation of oligodendrocyte differentiation	10	12	162	8.51	0.42
molecular_function	GO:0015026	coreceptor activity	10	13	162	7.86	0.42
cellular_component	GO:0005657	replication fork	10	13	162	7.86	0.42
biological_process	GO:0042074	cell migration involved in gastrulation	10	13	162	7.86	0.42
biological_process	GO:0048856	anatomical structure development	10	13	162	7.86	0.42
biological_process	GO:0090179	planar cell polarity pathway involved in neural tube closure	10	13	162	7.86	0.42
molecular_function	GO:0004407	histone deacetylase activity	10	14	162	7.3	0.42
biological_process	GO:0001709	cell fate determination	10	14	162	7.3	0.42
biological_process	GO:0014032	neural crest cell development	10	14	162	7.3	0.42
biological_process	GO:0009967	positive regulation of signal transduction	10	14	162	7.3	0.42
cellular_component	GO:0016585	chromatin remodeling complex	10	15	162	6.81	0.42
biological_process	GO:0030502	negative regulation of bone mineralization	10	15	162	6.81	0.42
biological_process	GO:0050718	positive regulation of interleukin-1 beta secretion	10	15	162	6.81	0.42
biological_process	GO:0048566	embryonic digestive tract development	10	15	162	6.81	0.42
molecular_function	GO:0071889	14-3-3 protein binding	10	16	162	6.38	0.42
biological_process	GO:0055008	cardiac muscle tissue morphogenesis	10	16	162	6.38	0.42
biological_process	GO:0043536	positive regulation of blood vessel endothelial cell migration	10	16	162	6.38	0.42
biological_process	GO:0001954	positive regulation of cell-matrix adhesion	10	16	162	6.38	0.42
molecular_function	GO:0004714	transmembrane receptor protein tyrosine kinase activity	10	18	162	5.67	0.41
biological_process	GO:0046427	positive regulation of JAK-STAT cascade	10	18	162	5.67	0.41
molecular_function	GO:0031435	mitogen-activated protein kinase kinase kinase binding	10	19	162	5.38	0.41
biological_process	GO:0050918	positive chemotaxis	10	19	162	5.38	0.41
biological_process	GO:0008630	intrinsic apoptotic signaling pathway in response to DNA damage response	10	19	162	5.38	0.41
biological_process	GO:0044130	negative regulation of growth of symbiont in host	10	19	162	5.38	0.41
biological_process	GO:0032728	positive regulation of interferon-beta production	10	19	162	5.38	0.41
biological_process	GO:0051898	negative regulation of protein kinase B signaling cascade	10	20	162	5.11	0.41
biological_process	GO:0060173	limb development	10	20	162	5.11	0.41
biological_process	GO:0045453	bone resorption	10	21	162	4.86	0.41
biological_process	GO:0045071	negative regulation of viral genome replication	10	21	162	4.86	0.41
biological_process	GO:0042517	positive regulation of tyrosine phosphorylation of Stat3 protein	10	22	162	4.64	0.41
biological_process	GO:2000379	positive regulation of reactive oxygen species metabolic process	10	22	162	4.64	0.41
biological_process	GO:0014911	positive regulation of smooth muscle cell migration	10	22	162	4.64	0.41
biological_process	GO:0002009	morphogenesis of an epithelium	10	23	162	4.44	0.41
biological_process	GO:0001836	release of cytochrome c from mitochondria	10	23	162	4.44	0.41
biological_process	GO:0007616	long-term memory	10	23	162	4.44	0.41
biological_process	GO:0060291	long-term synaptic potentiation	10	24	162	4.26	0.41
biological_process	GO:0070373	negative regulation of ERK1 and ERK2 cascade	10	24	162	4.26	0.41
molecular_function	GO:0001540	beta-amyloid binding	10	25	162	4.09	0.41
biological_process	GO:0051402	neuron apoptotic process	10	26	162	3.93	0.41
biological_process	GO:0050853	B cell receptor signaling pathway	10	27	162	3.78	0.41
molecular_function	GO:0004221	ubiquitin thiolesterase activity	10	28	162	3.65	0.41
biological_process	GO:0042130	negative regulation of T cell proliferation	10	28	162	3.65	0.41
biological_process	GO:0000186	activation of MAPKK activity	10	28	162	3.65	0.41
biological_process	GO:0035176	social behavior	10	28	162	3.65	0.41
molecular_function	GO:0008289	lipid binding	10	29	162	3.52	0.41
cellular_component	GO:0000793	condensed chromosome	10	29	162	3.52	0.41
biological_process	GO:0031623	receptor internalization	10	29	162	3.52	0.41
biological_process	GO:0002088	lens development in camera-type eye	10	29	162	3.52	0.41
biological_process	GO:0051384	response to glucocorticoid stimulus	10	29	162	3.52	0.41
biological_process	GO:0072659	protein localization to plasma membrane	10	29	162	3.52	0.41
biological_process	GO:0048167	regulation of synaptic plasticity	10	30	162	3.4	0.41
biological_process	GO:0030155	regulation of cell adhesion	10	30	162	3.4	0.41
biological_process	GO:0009611	response to wounding	10	31	162	3.3	0.41
biological_process	GO:0071391	cellular response to estrogen stimulus	10	31	162	3.3	0.41
biological_process	GO:0051930	regulation of sensory perception of pain	10	33	162	3.1	0.41
biological_process	GO:0051865	protein autoubiquitination	10	34	162	3	0.41
biological_process	GO:0045471	response to ethanol	10	36	162	2.84	0.41
biological_process	GO:0050766	positive regulation of phagocytosis	10	37	162	2.76	0.41
biological_process	GO:0070936	protein K48-linked ubiquitination	10	37	162	2.76	0.41
biological_process	GO:0006629	lipid metabolic process	10	38	162	2.69	0.41
molecular_function	GO:0048306	calcium-dependent protein binding	10	40	162	2.55	0.41
biological_process	GO:0006260	DNA replication	10	42	162	2.43	0.41
biological_process	GO:0000226	microtubule cytoskeleton organization	10	42	162	2.43	0.41
biological_process	GO:0007059	chromosome segregation	10	43	162	2.38	0.41
biological_process	GO:0015031	protein transport	10	43	162	2.38	0.41
molecular_function	GO:0044325	ion channel binding	10	46	162	2.22	0.41
biological_process	GO:0006897	endocytosis	10	48	162	2.13	0.41
cellular_component	GO:0005856	cytoskeleton	10	62	162	1.65	0.41
biological_process	GO:0006886	intracellular protein transport	10	69	162	1.48	0.41
molecular_function	GO:0003779	actin binding	10	108	162	0.95	0.4
cellular_component	GO:0005743	mitochondrial inner membrane	10	222	162	0.46	0.38
molecular_function	GO:0001190	RNA polymerase II transcription factor binding transcription factor activity involved in positive regulation of transcription	9	9	162	10.21	0.37
biological_process	GO:0003143	embryonic heart tube morphogenesis	9	9	162	10.21	0.37
biological_process	GO:0048762	mesenchymal cell differentiation	9	9	162	10.21	0.37
biological_process	GO:0010608	posttranscriptional regulation of gene expression	9	9	162	10.21	0.37
biological_process	GO:0003198	epithelial to mesenchymal transition involved in endocardial cushion formation	9	9	162	10.21	0.37
biological_process	GO:0003181	atrioventricular valve morphogenesis	9	9	162	10.21	0.37
biological_process	GO:0031065	positive regulation of histone deacetylation	9	9	162	10.21	0.37
biological_process	GO:0035067	negative regulation of histone acetylation	9	9	162	10.21	0.37
molecular_function	GO:0035257	nuclear hormone receptor binding	9	10	162	9.19	0.37
biological_process	GO:0003222	ventricular trabecula myocardium morphogenesis	9	10	162	9.19	0.37
biological_process	GO:0048103	somatic stem cell division	9	10	162	9.19	0.37
biological_process	GO:0043923	positive regulation by host of viral transcription	9	10	162	9.19	0.37
biological_process	GO:0010719	negative regulation of epithelial to mesenchymal transition	9	10	162	9.19	0.37
biological_process	GO:0061029	eyelid development in camera-type eye	9	10	162	9.19	0.37
biological_process	GO:0014902	myotube differentiation	9	10	162	9.19	0.37
biological_process	GO:0016574	histone ubiquitination	9	10	162	9.19	0.37
biological_process	GO:0032924	activin receptor signaling pathway	9	10	162	9.19	0.37
molecular_function	GO:0019789	SUMO ligase activity	9	11	162	8.36	0.37
molecular_function	GO:0005160	transforming growth factor beta receptor binding	9	11	162	8.36	0.37
molecular_function	GO:0042054	histone methyltransferase activity	9	11	162	8.36	0.37
molecular_function	GO:0050431	transforming growth factor beta binding	9	11	162	8.36	0.37
cellular_component	GO:0071564	npBAF complex	9	11	162	8.36	0.37
biological_process	GO:0031333	negative regulation of protein complex assembly	9	11	162	8.36	0.37
biological_process	GO:0043518	negative regulation of DNA damage response, signal transduction by p53 class mediator	9	11	162	8.36	0.37
biological_process	GO:0035909	aorta morphogenesis	9	11	162	8.36	0.37
cellular_component	GO:0035102	PRC1 complex	9	12	162	7.66	0.37
cellular_component	GO:0071565	nBAF complex	9	12	162	7.66	0.37
biological_process	GO:0060272	embryonic skeletal joint morphogenesis	9	12	162	7.66	0.37
biological_process	GO:0045086	positive regulation of interleukin-2 biosynthetic process	9	12	162	7.66	0.37
biological_process	GO:0003214	cardiac left ventricle morphogenesis	9	12	162	7.66	0.37
biological_process	GO:0002230	positive regulation of defense response to virus by host	9	12	162	7.66	0.37
biological_process	GO:0033160	positive regulation of protein import into nucleus, translocation	9	12	162	7.66	0.37
cellular_component	GO:0016514	SWI/SNF complex	9	13	162	7.07	0.37
biological_process	GO:0060071	Wnt receptor signaling pathway, planar cell polarity pathway	9	13	162	7.07	0.37
biological_process	GO:0051146	striated muscle cell differentiation	9	13	162	7.07	0.37
biological_process	GO:0045663	positive regulation of myoblast differentiation	9	13	162	7.07	0.37
biological_process	GO:0060444	branching involved in mammary gland duct morphogenesis	9	13	162	7.07	0.37
biological_process	GO:0043616	keratinocyte proliferation	9	14	162	6.57	0.37
biological_process	GO:0030949	positive regulation of vascular endothelial growth factor receptor signaling pathway	9	14	162	6.57	0.37
biological_process	GO:2000811	negative regulation of anoikis	9	14	162	6.57	0.37
biological_process	GO:0045746	negative regulation of Notch signaling pathway	9	14	162	6.57	0.37
biological_process	GO:0060441	epithelial tube branching involved in lung morphogenesis	9	15	162	6.13	0.37
biological_process	GO:0032722	positive regulation of chemokine production	9	15	162	6.13	0.37
biological_process	GO:0001759	organ induction	9	15	162	6.13	0.37
biological_process	GO:0045862	positive regulation of proteolysis	9	15	162	6.13	0.37
molecular_function	GO:0030332	cyclin binding	9	16	162	5.75	0.37
biological_process	GO:0042491	auditory receptor cell differentiation	9	16	162	5.75	0.37
biological_process	GO:0009267	cellular response to starvation	9	16	162	5.75	0.37
biological_process	GO:0071475	cellular hyperosmotic salinity response	9	16	162	5.75	0.37
biological_process	GO:0051568	histone H3-K4 methylation	9	16	162	5.75	0.37
biological_process	GO:0046579	positive regulation of Ras protein signal transduction	9	16	162	5.75	0.37
biological_process	GO:0010575	positive regulation vascular endothelial growth factor production	9	16	162	5.75	0.37
biological_process	GO:0048745	smooth muscle tissue development	9	17	162	5.41	0.37
biological_process	GO:0032874	positive regulation of stress-activated MAPK cascade	9	17	162	5.41	0.37
biological_process	GO:0032733	positive regulation of interleukin-10 production	9	17	162	5.41	0.37
biological_process	GO:0048872	homeostasis of number of cells	9	17	162	5.41	0.37
biological_process	GO:0097193	intrinsic apoptotic signaling pathway	9	18	162	5.11	0.37
biological_process	GO:0045930	negative regulation of mitotic cell cycle	9	18	162	5.11	0.37
biological_process	GO:0010634	positive regulation of epithelial cell migration	9	18	162	5.11	0.37
biological_process	GO:0048821	erythrocyte development	9	18	162	5.11	0.37
biological_process	GO:0042326	negative regulation of phosphorylation	9	18	162	5.11	0.37
biological_process	GO:0045671	negative regulation of osteoclast differentiation	9	18	162	5.11	0.37
biological_process	GO:0034394	protein localization to cell surface	9	19	162	4.84	0.37
biological_process	GO:0050714	positive regulation of protein secretion	9	20	162	4.6	0.37
biological_process	GO:0043542	endothelial cell migration	9	21	162	4.38	0.37
biological_process	GO:0006457	protein folding	9	21	162	4.38	0.37
molecular_function	GO:0043548	phosphatidylinositol 3-kinase binding	9	22	162	4.18	0.37
biological_process	GO:0060326	cell chemotaxis	9	22	162	4.18	0.37
biological_process	GO:0034976	response to endoplasmic reticulum stress	9	23	162	4	0.37
biological_process	GO:0009617	response to bacterium	9	23	162	4	0.37
biological_process	GO:0006611	protein export from nucleus	9	23	162	4	0.37
biological_process	GO:0071333	cellular response to glucose stimulus	9	23	162	4	0.37
biological_process	GO:0071300	cellular response to retinoic acid	9	23	162	4	0.37
biological_process	GO:0008380	RNA splicing	9	24	162	3.83	0.37
molecular_function	GO:0043499	eukaryotic cell surface binding	9	27	162	3.4	0.37
cellular_component	GO:0044444	cytoplasmic part	9	27	162	3.4	0.37
molecular_function	GO:0031072	heat shock protein binding	9	28	162	3.28	0.37
biological_process	GO:0007528	neuromuscular junction development	9	29	162	3.17	0.37
biological_process	GO:0050873	brown fat cell differentiation	9	29	162	3.17	0.37
biological_process	GO:0048008	platelet-derived growth factor receptor signaling pathway	9	29	162	3.17	0.37
biological_process	GO:0032956	regulation of actin cytoskeleton organization	9	29	162	3.17	0.37
biological_process	GO:0051209	release of sequestered calcium ion into cytosol	9	29	162	3.17	0.37
cellular_component	GO:0005876	spindle microtubule	9	30	162	3.06	0.37
biological_process	GO:0046676	negative regulation of insulin secretion	9	30	162	3.06	0.37
cellular_component	GO:0032587	ruffle membrane	9	32	162	2.87	0.37
cellular_component	GO:0030139	endocytic vesicle	9	32	162	2.87	0.37
cellular_component	GO:0016328	lateral plasma membrane	9	33	162	2.79	0.37
molecular_function	GO:0005507	copper ion binding	9	34	162	2.7	0.37
biological_process	GO:0006641	triglyceride metabolic process	9	34	162	2.7	0.37
biological_process	GO:0010212	response to ionizing radiation	9	34	162	2.7	0.37
molecular_function	GO:0004722	protein serine/threonine phosphatase activity	9	36	162	2.55	0.37
molecular_function	GO:0051087	chaperone binding	9	38	162	2.42	0.37
biological_process	GO:0006935	chemotaxis	9	38	162	2.42	0.37
biological_process	GO:0007266	Rho protein signal transduction	9	38	162	2.42	0.37
biological_process	GO:0016485	protein processing	9	43	162	2.14	0.37
cellular_component	GO:0005791	rough endoplasmic reticulum	9	46	162	2	0.37
cellular_component	GO:0043679	axon terminus	9	48	162	1.92	0.37
biological_process	GO:0050885	neuromuscular process controlling balance	9	49	162	1.88	0.37
molecular_function	GO:0005096	GTPase activator activity	9	54	162	1.7	0.37
cellular_component	GO:0030054	cell junction	9	67	162	1.37	0.37
biological_process	GO:0007010	cytoskeleton organization	9	69	162	1.33	0.37
cellular_component	GO:0008021	synaptic vesicle	9	73	162	1.26	0.36
cellular_component	GO:0005578	proteinaceous extracellular matrix	9	75	162	1.23	0.36
cellular_component	GO:0005874	microtubule	9	85	162	1.08	0.36
molecular_function	GO:0003924	GTPase activity	9	102	162	0.9	0.36
molecular_function	GO:0008233	peptidase activity	9	105	162	0.88	0.36
biological_process	GO:0006508	proteolysis	9	129	162	0.71	0.36
molecular_function	GO:0033558	protein deacetylase activity	8	8	162	10.21	0.33
molecular_function	GO:0000982	RNA polymerase II core promoter proximal region sequence-specific DNA binding transcription factor activity	8	8	162	10.21	0.33
biological_process	GO:0010944	negative regulation of transcription by competitive promoter binding	8	8	162	10.21	0.33
biological_process	GO:0048708	astrocyte differentiation	8	8	162	10.21	0.33
biological_process	GO:0045647	negative regulation of erythrocyte differentiation	8	8	162	10.21	0.33
biological_process	GO:0003203	endocardial cushion morphogenesis	8	8	162	10.21	0.33
biological_process	GO:2000678	negative regulation of transcription regulatory region DNA binding	8	8	162	10.21	0.33
biological_process	GO:0032933	SREBP signaling pathway	8	8	162	10.21	0.33
biological_process	GO:0071773	cellular response to BMP stimulus	8	8	162	10.21	0.33
biological_process	GO:0043586	tongue development	8	8	162	10.21	0.33
biological_process	GO:0045947	negative regulation of translational initiation	8	8	162	10.21	0.33
biological_process	GO:0034244	negative regulation of transcription elongation from RNA polymerase II promoter	8	8	162	10.21	0.33
biological_process	GO:0045080	positive regulation of chemokine biosynthetic process	8	8	162	10.21	0.33
molecular_function	GO:0048018	receptor agonist activity	8	9	162	9.08	0.33
molecular_function	GO:0042809	vitamin D receptor binding	8	9	162	9.08	0.33
molecular_function	GO:0031369	translation initiation factor binding	8	9	162	9.08	0.33
molecular_function	GO:0000993	RNA polymerase II core binding	8	9	162	9.08	0.33
cellular_component	GO:0035098	ESC/E(Z) complex	8	9	162	9.08	0.33
biological_process	GO:0060765	regulation of androgen receptor signaling pathway	8	9	162	9.08	0.33
biological_process	GO:0034587	piRNA metabolic process	8	9	162	9.08	0.33
biological_process	GO:0010667	negative regulation of cardiac muscle cell apoptotic process	8	9	162	9.08	0.33
biological_process	GO:0032495	response to muramyl dipeptide	8	9	162	9.08	0.33
biological_process	GO:0060391	positive regulation of SMAD protein import into nucleus	8	9	162	9.08	0.33
biological_process	GO:0051571	positive regulation of histone H3-K4 methylation	8	9	162	9.08	0.33
biological_process	GO:0051443	positive regulation of ubiquitin-protein ligase activity	8	9	162	9.08	0.33
biological_process	GO:0090009	primitive streak formation	8	9	162	9.08	0.33
biological_process	GO:0060840	artery development	8	9	162	9.08	0.33
biological_process	GO:0045603	positive regulation of endothelial cell differentiation	8	9	162	9.08	0.33
molecular_function	GO:0004693	cyclin-dependent protein kinase activity	8	10	162	8.17	0.33
molecular_function	GO:0070016	armadillo repeat domain binding	8	10	162	8.17	0.33
cellular_component	GO:0044428	nuclear part	8	10	162	8.17	0.33
cellular_component	GO:0030877	beta-catenin destruction complex	8	10	162	8.17	0.33
biological_process	GO:0021984	adenohypophysis development	8	10	162	8.17	0.33
biological_process	GO:0060413	atrial septum morphogenesis	8	10	162	8.17	0.33
biological_process	GO:0048711	positive regulation of astrocyte differentiation	8	10	162	8.17	0.33
biological_process	GO:0048730	epidermis morphogenesis	8	10	162	8.17	0.33
biological_process	GO:0060065	uterus development	8	10	162	8.17	0.33
biological_process	GO:0007398	ectoderm development	8	10	162	8.17	0.33
biological_process	GO:0033235	positive regulation of protein sumoylation	8	10	162	8.17	0.33
biological_process	GO:0060317	cardiac epithelial to mesenchymal transition	8	10	162	8.17	0.33
biological_process	GO:0045670	regulation of osteoclast differentiation	8	10	162	8.17	0.33
biological_process	GO:0014912	negative regulation of smooth muscle cell migration	8	10	162	8.17	0.33
biological_process	GO:0030225	macrophage differentiation	8	11	162	7.43	0.33
biological_process	GO:0030224	monocyte differentiation	8	11	162	7.43	0.33
biological_process	GO:0032695	negative regulation of interleukin-12 production	8	11	162	7.43	0.33
biological_process	GO:0010875	positive regulation of cholesterol efflux	8	11	162	7.43	0.33
biological_process	GO:0031334	positive regulation of protein complex assembly	8	11	162	7.43	0.33
biological_process	GO:0060740	prostate gland epithelium morphogenesis	8	11	162	7.43	0.33
biological_process	GO:0071364	cellular response to epidermal growth factor stimulus	8	11	162	7.43	0.33
biological_process	GO:0032703	negative regulation of interleukin-2 production	8	11	162	7.43	0.33
biological_process	GO:0048665	neuron fate specification	8	11	162	7.43	0.33
molecular_function	GO:0005112	Notch binding	8	12	162	6.81	0.33
cellular_component	GO:0035068	micro-ribonucleoprotein complex	8	12	162	6.81	0.33
biological_process	GO:0001946	lymphangiogenesis	8	12	162	6.81	0.33
biological_process	GO:0048608	reproductive structure development	8	12	162	6.81	0.33
biological_process	GO:2000378	negative regulation of reactive oxygen species metabolic process	8	12	162	6.81	0.33
biological_process	GO:0030278	regulation of ossification	8	12	162	6.81	0.33
biological_process	GO:0071347	cellular response to interleukin-1	8	12	162	6.81	0.33
molecular_function	GO:0005159	insulin-like growth factor receptor binding	8	13	162	6.29	0.33
biological_process	GO:0021846	cell proliferation in forebrain	8	13	162	6.29	0.33
biological_process	GO:0043537	negative regulation of blood vessel endothelial cell migration	8	13	162	6.29	0.33
biological_process	GO:0048712	negative regulation of astrocyte differentiation	8	13	162	6.29	0.33
biological_process	GO:0032753	positive regulation of interleukin-4 production	8	13	162	6.29	0.33
biological_process	GO:0060445	branching involved in salivary gland morphogenesis	8	13	162	6.29	0.33
biological_process	GO:0009314	response to radiation	8	13	162	6.29	0.33
biological_process	GO:0060347	heart trabecula formation	8	13	162	6.29	0.33
molecular_function	GO:0005164	tumor necrosis factor receptor binding	8	14	162	5.84	0.33
cellular_component	GO:0016581	NuRD complex	8	14	162	5.84	0.33
biological_process	GO:0043122	regulation of I-kappaB kinase/NF-kappaB cascade	8	14	162	5.84	0.33
biological_process	GO:0002063	chondrocyte development	8	14	162	5.84	0.33
biological_process	GO:0048854	brain morphogenesis	8	14	162	5.84	0.33
biological_process	GO:0032148	activation of protein kinase B activity	8	14	162	5.84	0.33
biological_process	GO:0046888	negative regulation of hormone secretion	8	14	162	5.84	0.33
biological_process	GO:0045725	positive regulation of glycogen biosynthetic process	8	14	162	5.84	0.33
biological_process	GO:0048738	cardiac muscle tissue development	8	15	162	5.45	0.33
biological_process	GO:0022409	positive regulation of cell-cell adhesion	8	15	162	5.45	0.33
biological_process	GO:0007250	activation of NF-kappaB-inducing kinase activity	8	15	162	5.45	0.33
biological_process	GO:0007520	myoblast fusion	8	15	162	5.45	0.33
biological_process	GO:0035265	organ growth	8	15	162	5.45	0.33
biological_process	GO:0022408	negative regulation of cell-cell adhesion	8	15	162	5.45	0.33
biological_process	GO:0031100	organ regeneration	8	15	162	5.45	0.33
molecular_function	GO:0017091	AU-rich element binding	8	16	162	5.11	0.33
biological_process	GO:0055088	lipid homeostasis	8	16	162	5.11	0.33
biological_process	GO:0021772	olfactory bulb development	8	16	162	5.11	0.33
biological_process	GO:1901215	negative regulation of neuron death	8	16	162	5.11	0.33
biological_process	GO:0050870	positive regulation of T cell activation	8	16	162	5.11	0.33
molecular_function	GO:0030295	protein kinase activator activity	8	17	162	4.81	0.33
biological_process	GO:0042311	vasodilation	8	17	162	4.81	0.33
biological_process	GO:0008585	female gonad development	8	17	162	4.81	0.33
biological_process	GO:0007585	respiratory gaseous exchange	8	17	162	4.81	0.33
biological_process	GO:0048168	regulation of neuronal synaptic plasticity	8	17	162	4.81	0.33
biological_process	GO:0046328	regulation of JNK cascade	8	18	162	4.54	0.33
biological_process	GO:0008156	negative regulation of DNA replication	8	18	162	4.54	0.33
molecular_function	GO:0030544	Hsp70 protein binding	8	19	162	4.3	0.33
cellular_component	GO:0000123	histone acetyltransferase complex	8	19	162	4.3	0.33
biological_process	GO:0001894	tissue homeostasis	8	19	162	4.3	0.33
biological_process	GO:0070059	intrinsic apoptotic signaling pathway in response to endoplasmic reticulum stress	8	19	162	4.3	0.33
biological_process	GO:0043029	T cell homeostasis	8	19	162	4.3	0.33
biological_process	GO:0034341	response to interferon-gamma	8	19	162	4.3	0.33
biological_process	GO:0070207	protein homotrimerization	8	19	162	4.3	0.33
biological_process	GO:0071479	cellular response to ionizing radiation	8	19	162	4.3	0.33
biological_process	GO:0071902	positive regulation of protein serine/threonine kinase activity	8	19	162	4.3	0.33
biological_process	GO:0000184	nuclear-transcribed mRNA catabolic process, nonsense-mediated decay	8	20	162	4.09	0.33
biological_process	GO:0010765	positive regulation of sodium ion transport	8	21	162	3.89	0.33
biological_process	GO:0030163	protein catabolic process	8	21	162	3.89	0.33
molecular_function	GO:0043022	ribosome binding	8	22	162	3.71	0.33
molecular_function	GO:0004857	enzyme inhibitor activity	8	22	162	3.71	0.33
biological_process	GO:0007173	epidermal growth factor receptor signaling pathway	8	22	162	3.71	0.33
biological_process	GO:0045909	positive regulation of vasodilation	8	23	162	3.55	0.33
biological_process	GO:0007631	feeding behavior	8	24	162	3.4	0.33
molecular_function	GO:0005154	epidermal growth factor receptor binding	8	26	162	3.14	0.33
biological_process	GO:0006952	defense response	8	26	162	3.14	0.33
biological_process	GO:0030968	endoplasmic reticulum unfolded protein response	8	26	162	3.14	0.33
biological_process	GO:0048169	regulation of long-term neuronal synaptic plasticity	8	27	162	3.03	0.33
biological_process	GO:0045907	positive regulation of vasoconstriction	8	28	162	2.92	0.33
biological_process	GO:0045777	positive regulation of blood pressure	8	28	162	2.92	0.33
cellular_component	GO:0009925	basal plasma membrane	8	29	162	2.82	0.33
biological_process	GO:0009725	response to hormone stimulus	8	29	162	2.82	0.33
biological_process	GO:0060079	regulation of excitatory postsynaptic membrane potential	8	29	162	2.82	0.33
biological_process	GO:0030838	positive regulation of actin filament polymerization	8	30	162	2.72	0.33
biological_process	GO:0010977	negative regulation of neuron projection development	8	30	162	2.72	0.33
cellular_component	GO:0000775	chromosome, centromeric region	8	32	162	2.55	0.33
biological_process	GO:0010811	positive regulation of cell-substrate adhesion	8	32	162	2.55	0.33
cellular_component	GO:0030016	myofibril	8	33	162	2.48	0.33
biological_process	GO:0016579	protein deubiquitination	8	34	162	2.4	0.33
biological_process	GO:0016358	dendrite development	8	34	162	2.4	0.33
biological_process	GO:0060048	cardiac muscle contraction	8	35	162	2.33	0.33
molecular_function	GO:0003725	double-stranded RNA binding	8	36	162	2.27	0.33
biological_process	GO:0007596	blood coagulation	8	37	162	2.21	0.33
biological_process	GO:0000724	double-strand break repair via homologous recombination	8	37	162	2.21	0.33
biological_process	GO:0009566	fertilization	8	38	162	2.15	0.33
cellular_component	GO:0005681	spliceosomal complex	8	39	162	2.1	0.33
biological_process	GO:0051592	response to calcium ion	8	40	162	2.04	0.33
cellular_component	GO:0043198	dendritic shaft	8	45	162	1.82	0.33
cellular_component	GO:0045111	intermediate filament cytoskeleton	8	48	162	1.7	0.33
cellular_component	GO:0043195	terminal button	8	54	162	1.51	0.33
molecular_function	GO:0042277	peptide binding	8	60	162	1.36	0.33
cellular_component	GO:0005741	mitochondrial outer membrane	8	63	162	1.3	0.33
cellular_component	GO:0005929	cilium	8	63	162	1.3	0.33
molecular_function	GO:0017124	SH3 domain binding	8	68	162	1.2	0.32
molecular_function	GO:0004867	serine-type endopeptidase inhibitor activity	8	71	162	1.15	0.32
biological_process	GO:0006184	GTP catabolic process	8	88	162	0.93	0.32
molecular_function	GO:0000989	transcription factor binding transcription factor activity	7	7	162	10.21	0.29
molecular_function	GO:0000983	RNA polymerase II core promoter sequence-specific DNA binding transcription factor activity	7	7	162	10.21	0.29
molecular_function	GO:0001076	RNA polymerase II transcription factor binding transcription factor activity	7	7	162	10.21	0.29
molecular_function	GO:0035497	cAMP response element binding	7	7	162	10.21	0.29
molecular_function	GO:0005110	frizzled-2 binding	7	7	162	10.21	0.29
molecular_function	GO:0030371	translation repressor activity	7	7	162	10.21	0.29
cellular_component	GO:0016593	Cdc73/Paf1 complex	7	7	162	10.21	0.29
biological_process	GO:0061037	negative regulation of cartilage development	7	7	162	10.21	0.29
biological_process	GO:0002218	activation of innate immune response	7	7	162	10.21	0.29
biological_process	GO:0001711	endodermal cell fate commitment	7	7	162	10.21	0.29
biological_process	GO:0055012	ventricular cardiac muscle cell differentiation	7	7	162	10.21	0.29
biological_process	GO:0042993	positive regulation of transcription factor import into nucleus	7	7	162	10.21	0.29
biological_process	GO:0060235	lens induction in camera-type eye	7	7	162	10.21	0.29
biological_process	GO:0060687	regulation of branching involved in prostate gland morphogenesis	7	7	162	10.21	0.29
biological_process	GO:0042789	mRNA transcription from RNA polymerase II promoter	7	7	162	10.21	0.29
biological_process	GO:0060056	mammary gland involution	7	7	162	10.21	0.29
biological_process	GO:2000178	negative regulation of neural precursor cell proliferation	7	7	162	10.21	0.29
biological_process	GO:0040029	regulation of gene expression, epigenetic	7	7	162	10.21	0.29
biological_process	GO:0010216	maintenance of DNA methylation	7	7	162	10.21	0.29
biological_process	GO:0033169	histone H3-K9 demethylation	7	7	162	10.21	0.29
biological_process	GO:0060174	limb bud formation	7	7	162	10.21	0.29
biological_process	GO:0060664	epithelial cell proliferation involved in salivary gland morphogenesis	7	7	162	10.21	0.29
biological_process	GO:0001893	maternal placenta development	7	7	162	10.21	0.29
biological_process	GO:0048642	negative regulation of skeletal muscle tissue development	7	7	162	10.21	0.29
biological_process	GO:0042473	outer ear morphogenesis	7	7	162	10.21	0.29
biological_process	GO:0001823	mesonephros development	7	7	162	10.21	0.29
biological_process	GO:0006342	chromatin silencing	7	7	162	10.21	0.29
biological_process	GO:0045945	positive regulation of transcription from RNA polymerase III promoter	7	7	162	10.21	0.29
biological_process	GO:2000279	negative regulation of DNA biosynthetic process	7	7	162	10.21	0.29
biological_process	GO:0060536	cartilage morphogenesis	7	7	162	10.21	0.29
biological_process	GO:0031054	pre-miRNA processing	7	7	162	10.21	0.29
biological_process	GO:0061371	determination of heart left/right asymmetry	7	7	162	10.21	0.29
molecular_function	GO:0001012	RNA polymerase II regulatory region DNA binding	7	8	162	8.94	0.29
molecular_function	GO:0045322	unmethylated CpG binding	7	8	162	8.94	0.29
biological_process	GO:0032926	negative regulation of activin receptor signaling pathway	7	8	162	8.94	0.29
biological_process	GO:0035567	non-canonical Wnt receptor signaling pathway	7	8	162	8.94	0.29
biological_process	GO:0030851	granulocyte differentiation	7	8	162	8.94	0.29
biological_process	GO:0048846	axon extension involved in axon guidance	7	8	162	8.94	0.29
biological_process	GO:0043068	positive regulation of programmed cell death	7	8	162	8.94	0.29
biological_process	GO:0006376	mRNA splice site selection	7	8	162	8.94	0.29
biological_process	GO:0042994	cytoplasmic sequestering of transcription factor	7	8	162	8.94	0.29
biological_process	GO:0045651	positive regulation of macrophage differentiation	7	8	162	8.94	0.29
biological_process	GO:0071514	genetic imprinting	7	8	162	8.94	0.29
biological_process	GO:2000273	positive regulation of receptor activity	7	8	162	8.94	0.29
biological_process	GO:0006368	transcription elongation from RNA polymerase II promoter	7	8	162	8.94	0.29
biological_process	GO:0043569	negative regulation of insulin-like growth factor receptor signaling pathway	7	8	162	8.94	0.29
biological_process	GO:0030330	DNA damage response, signal transduction by p53 class mediator	7	8	162	8.94	0.29
biological_process	GO:0030917	midbrain-hindbrain boundary development	7	8	162	8.94	0.29
cellular_component	GO:0033391	chromatoid body	7	9	162	7.94	0.29
biological_process	GO:0060644	mammary gland epithelial cell differentiation	7	9	162	7.94	0.29
biological_process	GO:0033148	positive regulation of intracellular estrogen receptor signaling pathway	7	9	162	7.94	0.29
biological_process	GO:0031017	exocrine pancreas development	7	9	162	7.94	0.29
biological_process	GO:0045843	negative regulation of striated muscle tissue development	7	9	162	7.94	0.29
biological_process	GO:0046628	positive regulation of insulin receptor signaling pathway	7	9	162	7.94	0.29
biological_process	GO:0032727	positive regulation of interferon-alpha production	7	9	162	7.94	0.29
biological_process	GO:0042551	neuron maturation	7	9	162	7.94	0.29
biological_process	GO:0045749	negative regulation of S phase of mitotic cell cycle	7	9	162	7.94	0.29
biological_process	GO:0050871	positive regulation of B cell activation	7	9	162	7.94	0.29
biological_process	GO:2000134	negative regulation of G1/S transition of mitotic cell cycle	7	9	162	7.94	0.29
biological_process	GO:0022010	central nervous system myelination	7	9	162	7.94	0.29
biological_process	GO:0007530	sex determination	7	9	162	7.94	0.29
cellular_component	GO:0016591	DNA-directed RNA polymerase II, holoenzyme	7	10	162	7.15	0.29
cellular_component	GO:0016580	Sin3 complex	7	10	162	7.15	0.29
cellular_component	GO:0035631	CD40 receptor complex	7	10	162	7.15	0.29
cellular_component	GO:0005675	holo TFIIH complex	7	10	162	7.15	0.29
biological_process	GO:0021953	central nervous system neuron differentiation	7	10	162	7.15	0.29
biological_process	GO:0045598	regulation of fat cell differentiation	7	10	162	7.15	0.29
biological_process	GO:0043589	skin morphogenesis	7	10	162	7.15	0.29
biological_process	GO:0043069	negative regulation of programmed cell death	7	10	162	7.15	0.29
biological_process	GO:0050927	positive regulation of positive chemotaxis	7	10	162	7.15	0.29
biological_process	GO:0030194	positive regulation of blood coagulation	7	10	162	7.15	0.29
biological_process	GO:0033598	mammary gland epithelial cell proliferation	7	10	162	7.15	0.29
biological_process	GO:0051457	maintenance of protein location in nucleus	7	10	162	7.15	0.29
biological_process	GO:0060484	lung-associated mesenchyme development	7	10	162	7.15	0.29
biological_process	GO:0060042	retina morphogenesis in camera-type eye	7	10	162	7.15	0.29
biological_process	GO:0048703	embryonic viscerocranium morphogenesis	7	10	162	7.15	0.29
biological_process	GO:0035413	positive regulation of catenin import into nucleus	7	10	162	7.15	0.29
biological_process	GO:0007199	G-protein coupled receptor signaling pathway coupled to cGMP nucleotide second messenger	7	10	162	7.15	0.29
biological_process	GO:0032740	positive regulation of interleukin-17 production	7	10	162	7.15	0.29
cellular_component	GO:0010369	chromocenter	7	11	162	6.5	0.29
biological_process	GO:0035855	megakaryocyte development	7	11	162	6.5	0.29
biological_process	GO:0040037	negative regulation of fibroblast growth factor receptor signaling pathway	7	11	162	6.5	0.29
biological_process	GO:0006476	protein deacetylation	7	11	162	6.5	0.29
biological_process	GO:0010390	histone monoubiquitination	7	11	162	6.5	0.29
biological_process	GO:0033137	negative regulation of peptidyl-serine phosphorylation	7	11	162	6.5	0.29
biological_process	GO:2001141	regulation of RNA biosynthetic process	7	11	162	6.5	0.29
biological_process	GO:0048339	paraxial mesoderm development	7	11	162	6.5	0.29
biological_process	GO:0021879	forebrain neuron differentiation	7	11	162	6.5	0.29
biological_process	GO:0042640	anagen	7	11	162	6.5	0.29
biological_process	GO:0001953	negative regulation of cell-matrix adhesion	7	11	162	6.5	0.29
biological_process	GO:0035815	positive regulation of renal sodium excretion	7	11	162	6.5	0.29
biological_process	GO:0021510	spinal cord development	7	11	162	6.5	0.29
biological_process	GO:0030903	notochord development	7	12	162	5.96	0.29
biological_process	GO:0050678	regulation of epithelial cell proliferation	7	12	162	5.96	0.29
biological_process	GO:2001015	negative regulation of skeletal muscle cell differentiation	7	12	162	5.96	0.29
biological_process	GO:0002224	toll-like receptor signaling pathway	7	12	162	5.96	0.29
biological_process	GO:0043011	myeloid dendritic cell differentiation	7	12	162	5.96	0.29
molecular_function	GO:0008094	DNA-dependent ATPase activity	7	13	162	5.5	0.29
cellular_component	GO:0045120	pronucleus	7	13	162	5.5	0.29
biological_process	GO:0002042	cell migration involved in sprouting angiogenesis	7	13	162	5.5	0.29
biological_process	GO:0090398	cellular senescence	7	13	162	5.5	0.29
biological_process	GO:0006334	nucleosome assembly	7	13	162	5.5	0.29
biological_process	GO:0050673	epithelial cell proliferation	7	13	162	5.5	0.29
biological_process	GO:0043623	cellular protein complex assembly	7	13	162	5.5	0.29
biological_process	GO:0001967	suckling behavior	7	13	162	5.5	0.29
biological_process	GO:0003323	type B pancreatic cell development	7	13	162	5.5	0.29
biological_process	GO:0006977	DNA damage response, signal transduction by p53 class mediator resulting in cell cycle arrest	7	13	162	5.5	0.29
molecular_function	GO:0017025	TBP-class protein binding	7	14	162	5.11	0.29
molecular_function	GO:0031434	mitogen-activated protein kinase kinase binding	7	14	162	5.11	0.29
biological_process	GO:0008361	regulation of cell size	7	14	162	5.11	0.29
biological_process	GO:0001963	synaptic transmission, dopaminergic	7	14	162	5.11	0.29
biological_process	GO:0050710	negative regulation of cytokine secretion	7	14	162	5.11	0.29
biological_process	GO:0050730	regulation of peptidyl-tyrosine phosphorylation	7	14	162	5.11	0.29
biological_process	GO:0040008	regulation of growth	7	14	162	5.11	0.29
biological_process	GO:2001238	positive regulation of extrinsic apoptotic signaling pathway	7	14	162	5.11	0.29
cellular_component	GO:0031988	membrane-bounded vesicle	7	15	162	4.77	0.29
cellular_component	GO:0005637	nuclear inner membrane	7	15	162	4.77	0.29
biological_process	GO:0031668	cellular response to extracellular stimulus	7	15	162	4.77	0.29
biological_process	GO:0000278	mitotic cell cycle	7	15	162	4.77	0.29
biological_process	GO:0050930	induction of positive chemotaxis	7	15	162	4.77	0.29
biological_process	GO:0051881	regulation of mitochondrial membrane potential	7	15	162	4.77	0.29
biological_process	GO:0018022	peptidyl-lysine methylation	7	15	162	4.77	0.29
biological_process	GO:0001556	oocyte maturation	7	15	162	4.77	0.29
biological_process	GO:0048747	muscle fiber development	7	15	162	4.77	0.29
molecular_function	GO:0043498	cell surface binding	7	16	162	4.47	0.29
molecular_function	GO:0051019	mitogen-activated protein kinase binding	7	16	162	4.47	0.29
molecular_function	GO:0005104	fibroblast growth factor receptor binding	7	16	162	4.47	0.29
biological_process	GO:2001244	positive regulation of intrinsic apoptotic signaling pathway	7	16	162	4.47	0.29
molecular_function	GO:0051879	Hsp90 protein binding	7	17	162	4.21	0.29
molecular_function	GO:0043021	ribonucleoprotein complex binding	7	17	162	4.21	0.29
biological_process	GO:0072661	protein targeting to plasma membrane	7	17	162	4.21	0.29
biological_process	GO:0045987	positive regulation of smooth muscle contraction	7	17	162	4.21	0.29
biological_process	GO:0042113	B cell activation	7	18	162	3.97	0.29
biological_process	GO:0019915	lipid storage	7	18	162	3.97	0.29
biological_process	GO:0019216	regulation of lipid metabolic process	7	18	162	3.97	0.29
biological_process	GO:0001782	B cell homeostasis	7	18	162	3.97	0.29
biological_process	GO:0045216	cell-cell junction organization	7	18	162	3.97	0.29
biological_process	GO:0006413	translational initiation	7	18	162	3.97	0.29
biological_process	GO:0055074	calcium ion homeostasis	7	18	162	3.97	0.29
biological_process	GO:0045184	establishment of protein localization	7	19	162	3.76	0.29
biological_process	GO:0050900	leukocyte migration	7	19	162	3.76	0.29
biological_process	GO:0006879	cellular iron ion homeostasis	7	20	162	3.58	0.29
biological_process	GO:0048593	camera-type eye morphogenesis	7	20	162	3.58	0.29
biological_process	GO:0045861	negative regulation of proteolysis	7	20	162	3.58	0.29
biological_process	GO:0071353	cellular response to interleukin-4	7	20	162	3.58	0.29
biological_process	GO:0002027	regulation of heart rate	7	21	162	3.4	0.29
molecular_function	GO:0051082	unfolded protein binding	7	22	162	3.25	0.29
biological_process	GO:0048813	dendrite morphogenesis	7	22	162	3.25	0.29
molecular_function	GO:0042562	hormone binding	7	23	162	3.11	0.29
molecular_function	GO:0017134	fibroblast growth factor binding	7	23	162	3.11	0.29
biological_process	GO:0051899	membrane depolarization	7	23	162	3.11	0.29
biological_process	GO:0033344	cholesterol efflux	7	23	162	3.11	0.29
biological_process	GO:0050905	neuromuscular process	7	23	162	3.11	0.29
biological_process	GO:0031572	G2/M transition DNA damage checkpoint	7	24	162	2.98	0.29
biological_process	GO:0050808	synapse organization	7	25	162	2.86	0.29
molecular_function	GO:0032947	protein complex scaffold	7	26	162	2.75	0.29
biological_process	GO:0006605	protein targeting	7	26	162	2.75	0.29
biological_process	GO:0007568	aging	7	26	162	2.75	0.29
biological_process	GO:0007416	synapse assembly	7	26	162	2.75	0.29
biological_process	GO:0034446	substrate adhesion-dependent cell spreading	7	26	162	2.75	0.29
molecular_function	GO:0030971	receptor tyrosine kinase binding	7	27	162	2.65	0.29
biological_process	GO:0072593	reactive oxygen species metabolic process	7	27	162	2.65	0.29
molecular_function	GO:0051117	ATPase binding	7	28	162	2.55	0.29
molecular_function	GO:0008565	protein transporter activity	7	28	162	2.55	0.29
biological_process	GO:0007067	mitosis	7	29	162	2.47	0.29
molecular_function	GO:0046875	ephrin receptor binding	7	31	162	2.31	0.29
molecular_function	GO:0016491	oxidoreductase activity	7	31	162	2.31	0.29
biological_process	GO:0007229	integrin-mediated signaling pathway	7	31	162	2.31	0.29
biological_process	GO:0006898	receptor-mediated endocytosis	7	31	162	2.31	0.29
cellular_component	GO:0000794	condensed nuclear chromosome	7	32	162	2.23	0.29
molecular_function	GO:0030674	protein binding, bridging	7	34	162	2.1	0.29
cellular_component	GO:0071944	cell periphery	7	38	162	1.88	0.29
biological_process	GO:0006631	fatty acid metabolic process	7	38	162	1.88	0.29
biological_process	GO:0031532	actin cytoskeleton reorganization	7	38	162	1.88	0.29
molecular_function	GO:0019902	phosphatase binding	7	39	162	1.83	0.29
biological_process	GO:0007612	learning	7	39	162	1.83	0.29
cellular_component	GO:0005778	peroxisomal membrane	7	43	162	1.66	0.29
cellular_component	GO:0000922	spindle pole	7	46	162	1.55	0.29
cellular_component	GO:0030176	integral to endoplasmic reticulum membrane	7	49	162	1.46	0.29
biological_process	GO:0051289	protein homotetramerization	7	51	162	1.4	0.29
molecular_function	GO:0005543	phospholipid binding	7	54	162	1.32	0.29
cellular_component	GO:0005759	mitochondrial matrix	7	55	162	1.3	0.29
biological_process	GO:0007601	visual perception	7	55	162	1.3	0.29
molecular_function	GO:0030246	carbohydrate binding	7	58	162	1.23	0.29
cellular_component	GO:0001726	ruffle	7	62	162	1.15	0.28
biological_process	GO:0070588	calcium ion transmembrane transport	7	62	162	1.15	0.28
molecular_function	GO:0005114	type II transforming growth factor beta receptor binding	6	6	162	10.21	0.25
molecular_function	GO:0001228	RNA polymerase II transcription regulatory region sequence-specific DNA binding transcription factor activity involved in positive regulation of transcription	6	6	162	10.21	0.25
molecular_function	GO:0051864	histone demethylase activity (H3-K36 specific)	6	6	162	10.21	0.25
molecular_function	GO:0001191	RNA polymerase II transcription factor binding transcription factor activity involved in negative regulation of transcription	6	6	162	10.21	0.25
molecular_function	GO:0008494	translation activator activity	6	6	162	10.21	0.25
biological_process	GO:0035278	negative regulation of translation involved in gene silencing by miRNA	6	6	162	10.21	0.25
biological_process	GO:0051247	positive regulation of protein metabolic process	6	6	162	10.21	0.25
biological_process	GO:0021797	forebrain anterior/posterior pattern specification	6	6	162	10.21	0.25
biological_process	GO:0030510	regulation of BMP signaling pathway	6	6	162	10.21	0.25
biological_process	GO:0090244	Wnt receptor signaling pathway involved in somitogenesis	6	6	162	10.21	0.25
biological_process	GO:0048935	peripheral nervous system neuron development	6	6	162	10.21	0.25
biological_process	GO:0060394	negative regulation of pathway-restricted SMAD protein phosphorylation	6	6	162	10.21	0.25
biological_process	GO:0097067	cellular response to thyroid hormone stimulus	6	6	162	10.21	0.25
biological_process	GO:0043619	regulation of transcription from RNA polymerase II promoter in response to oxidative stress	6	6	162	10.21	0.25
biological_process	GO:0061053	somite development	6	6	162	10.21	0.25
biological_process	GO:0016458	gene silencing	6	6	162	10.21	0.25
biological_process	GO:0003208	cardiac ventricle morphogenesis	6	6	162	10.21	0.25
biological_process	GO:0048026	positive regulation of mRNA splicing, via spliceosome	6	6	162	10.21	0.25
biological_process	GO:0061314	Notch signaling involved in heart development	6	6	162	10.21	0.25
biological_process	GO:0022612	gland morphogenesis	6	6	162	10.21	0.25
biological_process	GO:2000020	positive regulation of male gonad development	6	6	162	10.21	0.25
biological_process	GO:0033119	negative regulation of RNA splicing	6	6	162	10.21	0.25
biological_process	GO:0003139	secondary heart field specification	6	6	162	10.21	0.25
biological_process	GO:0045948	positive regulation of translational initiation	6	6	162	10.21	0.25
biological_process	GO:0000183	chromatin silencing at rDNA	6	6	162	10.21	0.25
biological_process	GO:0065004	protein-DNA complex assembly	6	6	162	10.21	0.25
biological_process	GO:2000679	positive regulation of transcription regulatory region DNA binding	6	6	162	10.21	0.25
biological_process	GO:0051573	negative regulation of histone H3-K9 methylation	6	6	162	10.21	0.25
biological_process	GO:0045916	negative regulation of complement activation	6	6	162	10.21	0.25
biological_process	GO:0010955	negative regulation of protein processing	6	6	162	10.21	0.25
molecular_function	GO:0008327	methyl-CpG binding	6	7	162	8.76	0.25
molecular_function	GO:0008353	RNA polymerase II carboxy-terminal domain kinase activity	6	7	162	8.76	0.25
molecular_function	GO:0050700	CARD domain binding	6	7	162	8.76	0.25
molecular_function	GO:0035198	miRNA binding	6	7	162	8.76	0.25
molecular_function	GO:0070700	BMP receptor binding	6	7	162	8.76	0.25
molecular_function	GO:0016407	acetyltransferase activity	6	7	162	8.76	0.25
molecular_function	GO:0005113	patched binding	6	7	162	8.76	0.25
cellular_component	GO:0043186	P granule	6	7	162	8.76	0.25
biological_process	GO:0060485	mesenchyme development	6	7	162	8.76	0.25
biological_process	GO:0033147	negative regulation of intracellular estrogen receptor signaling pathway	6	7	162	8.76	0.25
biological_process	GO:0060442	branching involved in prostate gland morphogenesis	6	7	162	8.76	0.25
biological_process	GO:0051024	positive regulation of immunoglobulin secretion	6	7	162	8.76	0.25
biological_process	GO:0070933	histone H4 deacetylation	6	7	162	8.76	0.25
biological_process	GO:0071157	negative regulation of cell cycle arrest	6	7	162	8.76	0.25
biological_process	GO:0010832	negative regulation of myotube differentiation	6	7	162	8.76	0.25
biological_process	GO:0060541	respiratory system development	6	7	162	8.76	0.25
biological_process	GO:0010870	positive regulation of receptor biosynthetic process	6	7	162	8.76	0.25
biological_process	GO:0031536	positive regulation of exit from mitosis	6	7	162	8.76	0.25
biological_process	GO:0045839	negative regulation of mitosis	6	7	162	8.76	0.25
biological_process	GO:0032494	response to peptidoglycan	6	7	162	8.76	0.25
biological_process	GO:0090184	positive regulation of kidney development	6	7	162	8.76	0.25
biological_process	GO:0030857	negative regulation of epithelial cell differentiation	6	7	162	8.76	0.25
biological_process	GO:0060059	embryonic retina morphogenesis in camera-type eye	6	7	162	8.76	0.25
biological_process	GO:0034115	negative regulation of heterotypic cell-cell adhesion	6	7	162	8.76	0.25
biological_process	GO:0042487	regulation of odontogenesis of dentin-containing tooth	6	7	162	8.76	0.25
biological_process	GO:0045348	positive regulation of MHC class II biosynthetic process	6	7	162	8.76	0.25
biological_process	GO:0048304	positive regulation of isotype switching to IgG isotypes	6	7	162	8.76	0.25
biological_process	GO:0060429	epithelium development	6	7	162	8.76	0.25
biological_process	GO:0032570	response to progesterone stimulus	6	7	162	8.76	0.25
biological_process	GO:0003197	endocardial cushion development	6	7	162	8.76	0.25
cellular_component	GO:0008023	transcription elongation factor complex	6	8	162	7.66	0.25
biological_process	GO:0043403	skeletal muscle tissue regeneration	6	8	162	7.66	0.25
biological_process	GO:0038092	nodal signaling pathway	6	8	162	7.66	0.25
biological_process	GO:0002250	adaptive immune response	6	8	162	7.66	0.25
biological_process	GO:0070932	histone H3 deacetylation	6	8	162	7.66	0.25
biological_process	GO:0032731	positive regulation of interleukin-1 beta production	6	8	162	7.66	0.25
biological_process	GO:0033689	negative regulation of osteoblast proliferation	6	8	162	7.66	0.25
biological_process	GO:0097150	neuronal stem cell maintenance	6	8	162	7.66	0.25
biological_process	GO:0044344	cellular response to fibroblast growth factor stimulus	6	8	162	7.66	0.25
biological_process	GO:0045084	positive regulation of interleukin-12 biosynthetic process	6	8	162	7.66	0.25
biological_process	GO:0060340	positive regulation of type I interferon-mediated signaling pathway	6	8	162	7.66	0.25
biological_process	GO:0035239	tube morphogenesis	6	8	162	7.66	0.25
biological_process	GO:0051567	histone H3-K9 methylation	6	8	162	7.66	0.25
biological_process	GO:0060603	mammary gland duct morphogenesis	6	8	162	7.66	0.25
biological_process	GO:0033523	histone H2B ubiquitination	6	8	162	7.66	0.25
biological_process	GO:0032525	somite rostral/caudal axis specification	6	8	162	7.66	0.25
biological_process	GO:0031659	positive regulation of cyclin-dependent protein kinase activity involved in G1/S	6	8	162	7.66	0.25
biological_process	GO:0007183	SMAD protein complex assembly	6	8	162	7.66	0.25
biological_process	GO:0035518	histone H2A monoubiquitination	6	8	162	7.66	0.25
biological_process	GO:2000648	positive regulation of stem cell proliferation	6	8	162	7.66	0.25
biological_process	GO:0048541	Peyer's patch development	6	8	162	7.66	0.25
biological_process	GO:0045618	positive regulation of keratinocyte differentiation	6	8	162	7.66	0.25
biological_process	GO:0007184	SMAD protein import into nucleus	6	8	162	7.66	0.25
biological_process	GO:0045410	positive regulation of interleukin-6 biosynthetic process	6	8	162	7.66	0.25
biological_process	GO:0043508	negative regulation of JUN kinase activity	6	9	162	6.81	0.25
biological_process	GO:0030193	regulation of blood coagulation	6	9	162	6.81	0.25
biological_process	GO:0031929	TOR signaling cascade	6	9	162	6.81	0.25
biological_process	GO:0045454	cell redox homeostasis	6	9	162	6.81	0.25
biological_process	GO:0048644	muscle organ morphogenesis	6	9	162	6.81	0.25
biological_process	GO:0070306	lens fiber cell differentiation	6	9	162	6.81	0.25
biological_process	GO:0006983	ER overload response	6	9	162	6.81	0.25
biological_process	GO:0050880	regulation of blood vessel size	6	9	162	6.81	0.25
biological_process	GO:0034122	negative regulation of toll-like receptor signaling pathway	6	9	162	6.81	0.25
biological_process	GO:0008015	blood circulation	6	9	162	6.81	0.25
biological_process	GO:0010613	positive regulation of cardiac muscle hypertrophy	6	9	162	6.81	0.25
biological_process	GO:0010744	positive regulation of macrophage derived foam cell differentiation	6	9	162	6.81	0.25
biological_process	GO:0032435	negative regulation of proteasomal ubiquitin-dependent protein catabolic process	6	9	162	6.81	0.25
biological_process	GO:0051781	positive regulation of cell division	6	9	162	6.81	0.25
biological_process	GO:0042511	positive regulation of tyrosine phosphorylation of Stat1 protein	6	9	162	6.81	0.25
biological_process	GO:0060674	placenta blood vessel development	6	9	162	6.81	0.25
biological_process	GO:0035414	negative regulation of catenin import into nucleus	6	9	162	6.81	0.25
biological_process	GO:0048599	oocyte development	6	9	162	6.81	0.25
biological_process	GO:0035810	positive regulation of urine volume	6	9	162	6.81	0.25
biological_process	GO:0060039	pericardium development	6	9	162	6.81	0.25
biological_process	GO:0072332	intrinsic apoptotic signaling pathway by p53 class mediator	6	9	162	6.81	0.25
molecular_function	GO:0008432	JUN kinase binding	6	10	162	6.13	0.25
molecular_function	GO:0004861	cyclin-dependent protein kinase inhibitor activity	6	10	162	6.13	0.25
molecular_function	GO:0004707	MAP kinase activity	6	10	162	6.13	0.25
molecular_function	GO:0008168	methyltransferase activity	6	10	162	6.13	0.25
biological_process	GO:0031076	embryonic camera-type eye development	6	10	162	6.13	0.25
biological_process	GO:0032743	positive regulation of interleukin-2 production	6	10	162	6.13	0.25
biological_process	GO:0048678	response to axon injury	6	10	162	6.13	0.25
biological_process	GO:0045445	myoblast differentiation	6	10	162	6.13	0.25
biological_process	GO:0030220	platelet formation	6	10	162	6.13	0.25
biological_process	GO:0045723	positive regulation of fatty acid biosynthetic process	6	10	162	6.13	0.25
biological_process	GO:0060707	trophoblast giant cell differentiation	6	10	162	6.13	0.25
biological_process	GO:0051894	positive regulation of focal adhesion assembly	6	10	162	6.13	0.25
biological_process	GO:0034968	histone lysine methylation	6	10	162	6.13	0.25
biological_process	GO:0090102	cochlea development	6	10	162	6.13	0.25
biological_process	GO:0048853	forebrain morphogenesis	6	10	162	6.13	0.25
molecular_function	GO:0045295	gamma-catenin binding	6	11	162	5.57	0.25
cellular_component	GO:0001741	XY body	6	11	162	5.57	0.25
biological_process	GO:0060068	vagina development	6	11	162	5.57	0.25
biological_process	GO:0042176	regulation of protein catabolic process	6	11	162	5.57	0.25
biological_process	GO:0046622	positive regulation of organ growth	6	11	162	5.57	0.25
biological_process	GO:0030238	male sex determination	6	11	162	5.57	0.25
biological_process	GO:2000060	positive regulation of protein ubiquitination involved in ubiquitin-dependent protein catabolic process	6	11	162	5.57	0.25
biological_process	GO:0043116	negative regulation of vascular permeability	6	11	162	5.57	0.25
biological_process	GO:0010596	negative regulation of endothelial cell migration	6	11	162	5.57	0.25
biological_process	GO:0010507	negative regulation of autophagy	6	11	162	5.57	0.25
biological_process	GO:0051000	positive regulation of nitric-oxide synthase activity	6	11	162	5.57	0.25
biological_process	GO:0035924	cellular response to vascular endothelial growth factor stimulus	6	11	162	5.57	0.25
biological_process	GO:0045667	regulation of osteoblast differentiation	6	11	162	5.57	0.25
biological_process	GO:0007263	nitric oxide mediated signal transduction	6	11	162	5.57	0.25
biological_process	GO:0007252	I-kappaB phosphorylation	6	11	162	5.57	0.25
biological_process	GO:0043281	regulation of cysteine-type endopeptidase activity involved in apoptotic process	6	11	162	5.57	0.25
biological_process	GO:0071901	negative regulation of protein serine/threonine kinase activity	6	11	162	5.57	0.25
molecular_function	GO:0031996	thioesterase binding	6	12	162	5.11	0.25
biological_process	GO:0051770	positive regulation of nitric-oxide synthase biosynthetic process	6	12	162	5.11	0.25
biological_process	GO:0060322	head development	6	12	162	5.11	0.25
biological_process	GO:0051272	positive regulation of cellular component movement	6	12	162	5.11	0.25
biological_process	GO:0002092	positive regulation of receptor internalization	6	12	162	5.11	0.25
biological_process	GO:0009966	regulation of signal transduction	6	12	162	5.11	0.25
biological_process	GO:0051044	positive regulation of membrane protein ectodomain proteolysis	6	12	162	5.11	0.25
biological_process	GO:0048009	insulin-like growth factor receptor signaling pathway	6	12	162	5.11	0.25
biological_process	GO:0009612	response to mechanical stimulus	6	12	162	5.11	0.25
biological_process	GO:0034614	cellular response to reactive oxygen species	6	12	162	5.11	0.25
biological_process	GO:0055072	iron ion homeostasis	6	12	162	5.11	0.25
cellular_component	GO:0030914	STAGA complex	6	13	162	4.71	0.25
biological_process	GO:0006970	response to osmotic stress	6	13	162	4.71	0.25
biological_process	GO:0061178	regulation of insulin secretion involved in cellular response to glucose stimulus	6	13	162	4.71	0.25
biological_process	GO:0001779	natural killer cell differentiation	6	13	162	4.71	0.25
biological_process	GO:0001819	positive regulation of cytokine production	6	13	162	4.71	0.25
biological_process	GO:0060134	prepulse inhibition	6	13	162	4.71	0.25
biological_process	GO:0016331	morphogenesis of embryonic epithelium	6	13	162	4.71	0.25
biological_process	GO:0008589	regulation of smoothened signaling pathway	6	13	162	4.71	0.25
biological_process	GO:0045089	positive regulation of innate immune response	6	13	162	4.71	0.25
molecular_function	GO:0019955	cytokine binding	6	14	162	4.38	0.25
biological_process	GO:0006402	mRNA catabolic process	6	14	162	4.38	0.25
biological_process	GO:0007512	adult heart development	6	14	162	4.38	0.25
biological_process	GO:0019395	fatty acid oxidation	6	14	162	4.38	0.25
cellular_component	GO:0072686	mitotic spindle	6	15	162	4.09	0.25
biological_process	GO:0048477	oogenesis	6	15	162	4.09	0.25
biological_process	GO:0090023	positive regulation of neutrophil chemotaxis	6	15	162	4.09	0.25
biological_process	GO:0042445	hormone metabolic process	6	15	162	4.09	0.25
biological_process	GO:0032007	negative regulation of TOR signaling cascade	6	15	162	4.09	0.25
molecular_function	GO:0051721	protein phosphatase 2A binding	6	16	162	3.83	0.25
molecular_function	GO:0000049	tRNA binding	6	16	162	3.83	0.25
cellular_component	GO:0012505	endomembrane system	6	16	162	3.83	0.25
biological_process	GO:0033365	protein localization to organelle	6	16	162	3.83	0.25
biological_process	GO:0032320	positive regulation of Ras GTPase activity	6	16	162	3.83	0.25
biological_process	GO:0001841	neural tube formation	6	16	162	3.83	0.25
biological_process	GO:0006397	mRNA processing	6	16	162	3.83	0.25
biological_process	GO:0048741	skeletal muscle fiber development	6	16	162	3.83	0.25
biological_process	GO:0035329	hippo signaling cascade	6	16	162	3.83	0.25
molecular_function	GO:0070064	proline-rich region binding	6	17	162	3.61	0.25
biological_process	GO:0006378	mRNA polyadenylation	6	17	162	3.61	0.25
biological_process	GO:0046677	response to antibiotic	6	17	162	3.61	0.25
biological_process	GO:0010165	response to X-ray	6	17	162	3.61	0.25
biological_process	GO:0019933	cAMP-mediated signaling	6	17	162	3.61	0.25
biological_process	GO:0045765	regulation of angiogenesis	6	17	162	3.61	0.25
biological_process	GO:0002028	regulation of sodium ion transport	6	17	162	3.61	0.25
molecular_function	GO:0019838	growth factor binding	6	18	162	3.4	0.25
cellular_component	GO:0072372	primary cilium	6	18	162	3.4	0.25
biological_process	GO:0007205	protein kinase C-activating G-protein coupled receptor signaling pathway	6	18	162	3.4	0.25
biological_process	GO:0000302	response to reactive oxygen species	6	18	162	3.4	0.25
molecular_function	GO:0005158	insulin receptor binding	6	19	162	3.23	0.25
cellular_component	GO:0000781	chromosome, telomeric region	6	19	162	3.23	0.25
biological_process	GO:0042098	T cell proliferation	6	19	162	3.23	0.25
biological_process	GO:0042832	defense response to protozoan	6	19	162	3.23	0.25
biological_process	GO:0051591	response to cAMP	6	19	162	3.23	0.25
molecular_function	GO:0001968	fibronectin binding	6	20	162	3.06	0.25
molecular_function	GO:0045296	cadherin binding	6	20	162	3.06	0.25
biological_process	GO:0051491	positive regulation of filopodium assembly	6	20	162	3.06	0.25
biological_process	GO:0006909	phagocytosis	6	20	162	3.06	0.25
molecular_function	GO:0003743	translation initiation factor activity	6	21	162	2.92	0.25
cellular_component	GO:0016235	aggresome	6	21	162	2.92	0.25
biological_process	GO:0030168	platelet activation	6	22	162	2.79	0.25
biological_process	GO:0051276	chromosome organization	6	22	162	2.79	0.25
biological_process	GO:0000077	DNA damage checkpoint	6	22	162	2.79	0.25
biological_process	GO:0045214	sarcomere organization	6	22	162	2.79	0.25
biological_process	GO:0050776	regulation of immune response	6	22	162	2.79	0.25
molecular_function	GO:0004197	cysteine-type endopeptidase activity	6	23	162	2.66	0.25
cellular_component	GO:0012506	vesicle membrane	6	23	162	2.66	0.25
biological_process	GO:0048873	homeostasis of number of cells within a tissue	6	23	162	2.66	0.25
biological_process	GO:0001662	behavioral fear response	6	23	162	2.66	0.25
cellular_component	GO:0005881	cytoplasmic microtubule	6	24	162	2.55	0.25
cellular_component	GO:0046658	anchored to plasma membrane	6	24	162	2.55	0.25
biological_process	GO:0030032	lamellipodium assembly	6	24	162	2.55	0.25
molecular_function	GO:0048487	beta-tubulin binding	6	28	162	2.19	0.25
biological_process	GO:0007265	Ras protein signal transduction	6	28	162	2.19	0.25
molecular_function	GO:0004721	phosphoprotein phosphatase activity	6	29	162	2.11	0.25
molecular_function	GO:0050660	flavin adenine dinucleotide binding	6	30	162	2.04	0.25
biological_process	GO:0000398	mRNA splicing, via spliceosome	6	30	162	2.04	0.25
biological_process	GO:0043547	positive regulation of GTPase activity	6	30	162	2.04	0.25
biological_process	GO:0007169	transmembrane receptor protein tyrosine kinase signaling pathway	6	32	162	1.92	0.25
cellular_component	GO:0031252	cell leading edge	6	34	162	1.8	0.25
molecular_function	GO:0005085	guanyl-nucleotide exchange factor activity	6	35	162	1.75	0.25
cellular_component	GO:0005932	microtubule basal body	6	35	162	1.75	0.25
biological_process	GO:0007030	Golgi organization	6	35	162	1.75	0.25
cellular_component	GO:0005811	lipid particle	6	36	162	1.7	0.25
biological_process	GO:0030317	sperm motility	6	38	162	1.61	0.25
molecular_function	GO:0005518	collagen binding	6	39	162	1.57	0.25
cellular_component	GO:0022627	cytosolic small ribosomal subunit	6	39	162	1.57	0.25
biological_process	GO:0000910	cytokinesis	6	39	162	1.57	0.25
cellular_component	GO:0031982	vesicle	6	42	162	1.46	0.25
biological_process	GO:0060271	cilium morphogenesis	6	45	162	1.36	0.25
molecular_function	GO:0004930	G-protein coupled receptor activity	6	53	162	1.16	0.24
cellular_component	GO:0005923	tight junction	6	66	162	0.93	0.24
molecular_function	GO:0051015	actin filament binding	6	69	162	0.89	0.24
biological_process	GO:0010951	negative regulation of endopeptidase activity	6	82	162	0.75	0.24
molecular_function	GO:0000900	translation repressor activity, nucleic acid binding	5	5	162	10.21	0.21
molecular_function	GO:0032454	histone demethylase activity (H3-K9 specific)	5	5	162	10.21	0.21
molecular_function	GO:0051525	NFAT protein binding	5	5	162	10.21	0.21
molecular_function	GO:0043426	MRF binding	5	5	162	10.21	0.21
cellular_component	GO:0005677	chromatin silencing complex	5	5	162	10.21	0.21
cellular_component	GO:0070937	CRD-mediated mRNA stability complex	5	5	162	10.21	0.21
cellular_component	GO:0005851	eukaryotic translation initiation factor 2B complex	5	5	162	10.21	0.21
biological_process	GO:0048263	determination of dorsal identity	5	5	162	10.21	0.21
biological_process	GO:0060261	positive regulation of transcription initiation from RNA polymerase II promoter	5	5	162	10.21	0.21
biological_process	GO:0048096	chromatin-mediated maintenance of transcription	5	5	162	10.21	0.21
biological_process	GO:0003211	cardiac ventricle formation	5	5	162	10.21	0.21
biological_process	GO:0035284	brain segmentation	5	5	162	10.21	0.21
biological_process	GO:2000059	negative regulation of protein ubiquitination involved in ubiquitin-dependent protein catabolic process	5	5	162	10.21	0.21
biological_process	GO:0072075	metanephric mesenchyme development	5	5	162	10.21	0.21
biological_process	GO:0010424	DNA methylation on cytosine within a CG sequence	5	5	162	10.21	0.21
biological_process	GO:0032364	oxygen homeostasis	5	5	162	10.21	0.21
biological_process	GO:0031665	negative regulation of lipopolysaccharide-mediated signaling pathway	5	5	162	10.21	0.21
biological_process	GO:0060684	epithelial-mesenchymal cell signaling	5	5	162	10.21	0.21
biological_process	GO:0001714	endodermal cell fate specification	5	5	162	10.21	0.21
biological_process	GO:0060231	mesenchymal to epithelial transition	5	5	162	10.21	0.21
biological_process	GO:0002051	osteoblast fate commitment	5	5	162	10.21	0.21
biological_process	GO:0048619	embryonic hindgut morphogenesis	5	5	162	10.21	0.21
biological_process	GO:0003344	pericardium morphogenesis	5	5	162	10.21	0.21
biological_process	GO:0032784	regulation of DNA-dependent transcription, elongation	5	5	162	10.21	0.21
biological_process	GO:0048793	pronephros development	5	5	162	10.21	0.21
biological_process	GO:0006346	methylation-dependent chromatin silencing	5	5	162	10.21	0.21
biological_process	GO:0000083	regulation of transcription involved in G1/S phase of mitotic cell cycle	5	5	162	10.21	0.21
biological_process	GO:0010694	positive regulation of alkaline phosphatase activity	5	5	162	10.21	0.21
biological_process	GO:0032736	positive regulation of interleukin-13 production	5	5	162	10.21	0.21
biological_process	GO:0070934	CRD-mediated mRNA stabilization	5	5	162	10.21	0.21
biological_process	GO:0001514	selenocysteine incorporation	5	5	162	10.21	0.21
biological_process	GO:0014031	mesenchymal cell development	5	5	162	10.21	0.21
biological_process	GO:0033085	negative regulation of T cell differentiation in thymus	5	5	162	10.21	0.21
biological_process	GO:0031442	positive regulation of mRNA 3'-end processing	5	5	162	10.21	0.21
biological_process	GO:0060841	venous blood vessel development	5	5	162	10.21	0.21
biological_process	GO:0032410	negative regulation of transporter activity	5	5	162	10.21	0.21
biological_process	GO:0060836	lymphatic endothelial cell differentiation	5	5	162	10.21	0.21
biological_process	GO:0060789	hair follicle placode formation	5	5	162	10.21	0.21
biological_process	GO:0060761	negative regulation of response to cytokine stimulus	5	5	162	10.21	0.21
biological_process	GO:0061009	common bile duct development	5	5	162	10.21	0.21
biological_process	GO:0044027	hypermethylation of CpG island	5	5	162	10.21	0.21
biological_process	GO:0031063	regulation of histone deacetylation	5	5	162	10.21	0.21
biological_process	GO:0060948	cardiac vascular smooth muscle cell development	5	5	162	10.21	0.21
biological_process	GO:0009410	response to xenobiotic stimulus	5	5	162	10.21	0.21
biological_process	GO:0030219	megakaryocyte differentiation	5	5	162	10.21	0.21
biological_process	GO:0060363	cranial suture morphogenesis	5	5	162	10.21	0.21
biological_process	GO:0021861	forebrain radial glial cell differentiation	5	5	162	10.21	0.21
biological_process	GO:0090370	negative regulation of cholesterol efflux	5	5	162	10.21	0.21
biological_process	GO:0051098	regulation of binding	5	5	162	10.21	0.21
biological_process	GO:0010839	negative regulation of keratinocyte proliferation	5	5	162	10.21	0.21
biological_process	GO:0060982	coronary artery morphogenesis	5	5	162	10.21	0.21
biological_process	GO:0003180	aortic valve morphogenesis	5	5	162	10.21	0.21
biological_process	GO:0051150	regulation of smooth muscle cell differentiation	5	5	162	10.21	0.21
biological_process	GO:0002573	myeloid leukocyte differentiation	5	5	162	10.21	0.21
biological_process	GO:0035412	regulation of catenin import into nucleus	5	5	162	10.21	0.21
biological_process	GO:0071481	cellular response to X-ray	5	5	162	10.21	0.21
biological_process	GO:0060415	muscle tissue morphogenesis	5	5	162	10.21	0.21
biological_process	GO:0060008	Sertoli cell differentiation	5	5	162	10.21	0.21
biological_process	GO:2000543	positive regulation of gastrulation	5	5	162	10.21	0.21
biological_process	GO:0051716	cellular response to stimulus	5	5	162	10.21	0.21
biological_process	GO:0051152	positive regulation of smooth muscle cell differentiation	5	5	162	10.21	0.21
biological_process	GO:0045617	negative regulation of keratinocyte differentiation	5	5	162	10.21	0.21
biological_process	GO:0080182	histone H3-K4 trimethylation	5	5	162	10.21	0.21
molecular_function	GO:0071813	lipoprotein particle binding	5	6	162	8.51	0.21
molecular_function	GO:0004702	receptor signaling protein serine/threonine kinase activity	5	6	162	8.51	0.21
molecular_function	GO:0035197	siRNA binding	5	6	162	8.51	0.21
cellular_component	GO:0001739	sex chromatin	5	6	162	8.51	0.21
cellular_component	GO:0032589	neuron projection membrane	5	6	162	8.51	0.21
biological_process	GO:0048643	positive regulation of skeletal muscle tissue development	5	6	162	8.51	0.21
biological_process	GO:0032469	endoplasmic reticulum calcium ion homeostasis	5	6	162	8.51	0.21
biological_process	GO:0034720	histone H3-K4 demethylation	5	6	162	8.51	0.21
biological_process	GO:0070544	histone H3-K36 demethylation	5	6	162	8.51	0.21
biological_process	GO:2000778	positive regulation of interleukin-6 secretion	5	6	162	8.51	0.21
biological_process	GO:2000484	positive regulation of interleukin-8 secretion	5	6	162	8.51	0.21
biological_process	GO:2000727	positive regulation of cardiac muscle cell differentiation	5	6	162	8.51	0.21
biological_process	GO:0060043	regulation of cardiac muscle cell proliferation	5	6	162	8.51	0.21
biological_process	GO:0043497	regulation of protein heterodimerization activity	5	6	162	8.51	0.21
biological_process	GO:0060762	regulation of branching involved in mammary gland duct morphogenesis	5	6	162	8.51	0.21
biological_process	GO:0071803	positive regulation of podosome assembly	5	6	162	8.51	0.21
biological_process	GO:0008595	anterior/posterior axis specification, embryo	5	6	162	8.51	0.21
biological_process	GO:0043401	steroid hormone mediated signaling pathway	5	6	162	8.51	0.21
biological_process	GO:0002320	lymphoid progenitor cell differentiation	5	6	162	8.51	0.21
biological_process	GO:2000036	regulation of stem cell maintenance	5	6	162	8.51	0.21
biological_process	GO:0070723	response to cholesterol	5	6	162	8.51	0.21
biological_process	GO:0010894	negative regulation of steroid biosynthetic process	5	6	162	8.51	0.21
biological_process	GO:0070245	positive regulation of thymocyte apoptotic process	5	6	162	8.51	0.21
biological_process	GO:0019934	cGMP-mediated signaling	5	6	162	8.51	0.21
biological_process	GO:2000179	positive regulation of neural precursor cell proliferation	5	6	162	8.51	0.21
biological_process	GO:0060411	cardiac septum morphogenesis	5	6	162	8.51	0.21
biological_process	GO:0060028	convergent extension involved in axis elongation	5	6	162	8.51	0.21
biological_process	GO:0043249	erythrocyte maturation	5	6	162	8.51	0.21
biological_process	GO:0043353	enucleate erythrocyte differentiation	5	6	162	8.51	0.21
biological_process	GO:0045654	positive regulation of megakaryocyte differentiation	5	6	162	8.51	0.21
biological_process	GO:0051222	positive regulation of protein transport	5	6	162	8.51	0.21
biological_process	GO:0060561	apoptotic process involved in morphogenesis	5	6	162	8.51	0.21
biological_process	GO:0048505	regulation of timing of cell differentiation	5	6	162	8.51	0.21
biological_process	GO:0060026	convergent extension	5	6	162	8.51	0.21
biological_process	GO:0006473	protein acetylation	5	6	162	8.51	0.21
biological_process	GO:0042308	negative regulation of protein import into nucleus	5	6	162	8.51	0.21
biological_process	GO:0010564	regulation of cell cycle process	5	6	162	8.51	0.21
biological_process	GO:0050847	progesterone receptor signaling pathway	5	6	162	8.51	0.21
biological_process	GO:0060510	Type II pneumocyte differentiation	5	6	162	8.51	0.21
biological_process	GO:0009620	response to fungus	5	6	162	8.51	0.21
biological_process	GO:0060463	lung lobe morphogenesis	5	6	162	8.51	0.21
biological_process	GO:0060744	mammary gland branching involved in thelarche	5	6	162	8.51	0.21
biological_process	GO:2001235	positive regulation of apoptotic signaling pathway	5	6	162	8.51	0.21
biological_process	GO:0070986	left/right axis specification	5	6	162	8.51	0.21
biological_process	GO:0033600	negative regulation of mammary gland epithelial cell proliferation	5	6	162	8.51	0.21
molecular_function	GO:0003707	steroid hormone receptor activity	5	7	162	7.3	0.21
molecular_function	GO:0004697	protein kinase C activity	5	7	162	7.3	0.21
molecular_function	GO:0034713	type I transforming growth factor beta receptor binding	5	7	162	7.3	0.21
molecular_function	GO:0000400	four-way junction DNA binding	5	7	162	7.3	0.21
molecular_function	GO:0008035	high-density lipoprotein particle binding	5	7	162	7.3	0.21
molecular_function	GO:0005024	transforming growth factor beta-activated receptor activity	5	7	162	7.3	0.21
molecular_function	GO:0048027	mRNA 5'-UTR binding	5	7	162	7.3	0.21
molecular_function	GO:0042800	histone methyltransferase activity (H3-K4 specific)	5	7	162	7.3	0.21
biological_process	GO:0060017	parathyroid gland development	5	7	162	7.3	0.21
biological_process	GO:0055015	ventricular cardiac muscle cell development	5	7	162	7.3	0.21
biological_process	GO:0007435	salivary gland morphogenesis	5	7	162	7.3	0.21
biological_process	GO:0050921	positive regulation of chemotaxis	5	7	162	7.3	0.21
biological_process	GO:0048752	semicircular canal morphogenesis	5	7	162	7.3	0.21
biological_process	GO:0006029	proteoglycan metabolic process	5	7	162	7.3	0.21
biological_process	GO:0060022	hard palate development	5	7	162	7.3	0.21
biological_process	GO:0032609	interferon-gamma production	5	7	162	7.3	0.21
biological_process	GO:0045823	positive regulation of heart contraction	5	7	162	7.3	0.21
biological_process	GO:0048048	embryonic eye morphogenesis	5	7	162	7.3	0.21
biological_process	GO:0010831	positive regulation of myotube differentiation	5	7	162	7.3	0.21
biological_process	GO:0048732	gland development	5	7	162	7.3	0.21
biological_process	GO:0030858	positive regulation of epithelial cell differentiation	5	7	162	7.3	0.21
biological_process	GO:0030916	otic vesicle formation	5	7	162	7.3	0.21
biological_process	GO:0060527	prostate epithelial cord arborization involved in prostate glandular acinus morphogenesis	5	7	162	7.3	0.21
biological_process	GO:0060576	intestinal epithelial cell development	5	7	162	7.3	0.21
biological_process	GO:0051054	positive regulation of DNA metabolic process	5	7	162	7.3	0.21
biological_process	GO:0048864	stem cell development	5	7	162	7.3	0.21
biological_process	GO:0048562	embryonic organ morphogenesis	5	7	162	7.3	0.21
biological_process	GO:0030856	regulation of epithelial cell differentiation	5	7	162	7.3	0.21
biological_process	GO:0052033	pathogen-associated molecular pattern dependent induction by symbiont of host innate immune response	5	7	162	7.3	0.21
biological_process	GO:0031103	axon regeneration	5	7	162	7.3	0.21
biological_process	GO:0046889	positive regulation of lipid biosynthetic process	5	7	162	7.3	0.21
biological_process	GO:0045359	positive regulation of interferon-beta biosynthetic process	5	7	162	7.3	0.21
biological_process	GO:0009913	epidermal cell differentiation	5	7	162	7.3	0.21
biological_process	GO:0048645	organ formation	5	7	162	7.3	0.21
biological_process	GO:0060710	chorio-allantoic fusion	5	7	162	7.3	0.21
biological_process	GO:0030854	positive regulation of granulocyte differentiation	5	7	162	7.3	0.21
biological_process	GO:0033210	leptin-mediated signaling pathway	5	7	162	7.3	0.21
biological_process	GO:0002726	positive regulation of T cell cytokine production	5	7	162	7.3	0.21
biological_process	GO:0071223	cellular response to lipoteichoic acid	5	7	162	7.3	0.21
molecular_function	GO:0004004	ATP-dependent RNA helicase activity	5	8	162	6.38	0.21
molecular_function	GO:0003906	DNA-(apurinic or apyrimidinic site) lyase activity	5	8	162	6.38	0.21
molecular_function	GO:0043522	leucine zipper domain binding	5	8	162	6.38	0.21
cellular_component	GO:0005721	centromeric heterochromatin	5	8	162	6.38	0.21
biological_process	GO:0002064	epithelial cell development	5	8	162	6.38	0.21
biological_process	GO:0060136	embryonic process involved in female pregnancy	5	8	162	6.38	0.21
biological_process	GO:0006379	mRNA cleavage	5	8	162	6.38	0.21
biological_process	GO:0090280	positive regulation of calcium ion import	5	8	162	6.38	0.21
biological_process	GO:0031643	positive regulation of myelination	5	8	162	6.38	0.21
biological_process	GO:0002282	microglial cell activation involved in immune response	5	8	162	6.38	0.21
biological_process	GO:0030098	lymphocyte differentiation	5	8	162	6.38	0.21
biological_process	GO:0051246	regulation of protein metabolic process	5	8	162	6.38	0.21
biological_process	GO:0032700	negative regulation of interleukin-17 production	5	8	162	6.38	0.21
biological_process	GO:0045416	positive regulation of interleukin-8 biosynthetic process	5	8	162	6.38	0.21
biological_process	GO:0001553	luteinization	5	8	162	6.38	0.21
biological_process	GO:0045742	positive regulation of epidermal growth factor receptor signaling pathway	5	8	162	6.38	0.21
biological_process	GO:0035025	positive regulation of Rho protein signal transduction	5	8	162	6.38	0.21
biological_process	GO:0070102	interleukin-6-mediated signaling pathway	5	8	162	6.38	0.21
biological_process	GO:0071850	mitotic cell cycle arrest	5	8	162	6.38	0.21
biological_process	GO:0010656	negative regulation of muscle cell apoptotic process	5	8	162	6.38	0.21
biological_process	GO:0008354	germ cell migration	5	8	162	6.38	0.21
biological_process	GO:0060346	bone trabecula formation	5	8	162	6.38	0.21
biological_process	GO:0033089	positive regulation of T cell differentiation in thymus	5	8	162	6.38	0.21
biological_process	GO:0060426	lung vasculature development	5	8	162	6.38	0.21
biological_process	GO:0060711	labyrinthine layer development	5	8	162	6.38	0.21
biological_process	GO:0001763	morphogenesis of a branching structure	5	8	162	6.38	0.21
biological_process	GO:0042088	T-helper 1 type immune response	5	8	162	6.38	0.21
biological_process	GO:0072358	cardiovascular system development	5	8	162	6.38	0.21
biological_process	GO:0090037	positive regulation of protein kinase C signaling cascade	5	8	162	6.38	0.21
molecular_function	GO:0016279	protein-lysine N-methyltransferase activity	5	9	162	5.67	0.21
cellular_component	GO:0000307	cyclin-dependent protein kinase holoenzyme complex	5	9	162	5.67	0.21
cellular_component	GO:0044445	cytosolic part	5	9	162	5.67	0.21
biological_process	GO:0019217	regulation of fatty acid metabolic process	5	9	162	5.67	0.21
biological_process	GO:0021889	olfactory bulb interneuron differentiation	5	9	162	5.67	0.21
biological_process	GO:0071549	cellular response to dexamethasone stimulus	5	9	162	5.67	0.21
biological_process	GO:0043534	blood vessel endothelial cell migration	5	9	162	5.67	0.21
biological_process	GO:0010745	negative regulation of macrophage derived foam cell differentiation	5	9	162	5.67	0.21
biological_process	GO:0001952	regulation of cell-matrix adhesion	5	9	162	5.67	0.21
biological_process	GO:0045717	negative regulation of fatty acid biosynthetic process	5	9	162	5.67	0.21
biological_process	GO:0033690	positive regulation of osteoblast proliferation	5	9	162	5.67	0.21
biological_process	GO:0090026	positive regulation of monocyte chemotaxis	5	9	162	5.67	0.21
biological_process	GO:0021895	cerebral cortex neuron differentiation	5	9	162	5.67	0.21
biological_process	GO:0050708	regulation of protein secretion	5	9	162	5.67	0.21
biological_process	GO:0050765	negative regulation of phagocytosis	5	9	162	5.67	0.21
biological_process	GO:2000573	positive regulation of DNA biosynthetic process	5	9	162	5.67	0.21
biological_process	GO:0006325	chromatin organization	5	9	162	5.67	0.21
biological_process	GO:0060947	cardiac vascular smooth muscle cell differentiation	5	9	162	5.67	0.21
biological_process	GO:0031953	negative regulation of protein autophosphorylation	5	9	162	5.67	0.21
biological_process	GO:0060736	prostate gland growth	5	9	162	5.67	0.21
biological_process	GO:0045821	positive regulation of glycolysis	5	9	162	5.67	0.21
biological_process	GO:0001935	endothelial cell proliferation	5	9	162	5.67	0.21
biological_process	GO:2000352	negative regulation of endothelial cell apoptotic process	5	9	162	5.67	0.21
biological_process	GO:0061032	visceral serous pericardium development	5	9	162	5.67	0.21
molecular_function	GO:0043539	protein serine/threonine kinase activator activity	5	10	162	5.11	0.21
molecular_function	GO:0016209	antioxidant activity	5	10	162	5.11	0.21
molecular_function	GO:0016706	oxidoreductase activity, acting on paired donors, with incorporation or reduction of molecular oxygen, 2-oxoglutarate as one donor, and incorporation of one atom each of oxygen into both donors	5	10	162	5.11	0.21
biological_process	GO:0046325	negative regulation of glucose import	5	10	162	5.11	0.21
biological_process	GO:0010259	multicellular organismal aging	5	10	162	5.11	0.21
biological_process	GO:0010812	negative regulation of cell-substrate adhesion	5	10	162	5.11	0.21
biological_process	GO:0060993	kidney morphogenesis	5	10	162	5.11	0.21
biological_process	GO:0045019	negative regulation of nitric oxide biosynthetic process	5	10	162	5.11	0.21
biological_process	GO:0000904	cell morphogenesis involved in differentiation	5	10	162	5.11	0.21
biological_process	GO:0045070	positive regulation of viral genome replication	5	10	162	5.11	0.21
biological_process	GO:0010508	positive regulation of autophagy	5	10	162	5.11	0.21
molecular_function	GO:0051428	peptide hormone receptor binding	5	11	162	4.64	0.21
molecular_function	GO:0018024	histone-lysine N-methyltransferase activity	5	11	162	4.64	0.21
biological_process	GO:0046697	decidualization	5	11	162	4.64	0.21
biological_process	GO:0001945	lymph vessel development	5	11	162	4.64	0.21
biological_process	GO:0031396	regulation of protein ubiquitination	5	11	162	4.64	0.21
biological_process	GO:0045579	positive regulation of B cell differentiation	5	11	162	4.64	0.21
biological_process	GO:0001542	ovulation from ovarian follicle	5	11	162	4.64	0.21
biological_process	GO:0050732	negative regulation of peptidyl-tyrosine phosphorylation	5	11	162	4.64	0.21
biological_process	GO:0046827	positive regulation of protein export from nucleus	5	11	162	4.64	0.21
biological_process	GO:0045792	negative regulation of cell size	5	11	162	4.64	0.21
biological_process	GO:0021702	cerebellar Purkinje cell differentiation	5	11	162	4.64	0.21
biological_process	GO:0001736	establishment of planar polarity	5	11	162	4.64	0.21
biological_process	GO:2000147	positive regulation of cell motility	5	11	162	4.64	0.21
biological_process	GO:0002031	G-protein coupled receptor internalization	5	11	162	4.64	0.21
molecular_function	GO:0008656	cysteine-type endopeptidase activator activity involved in apoptotic process	5	12	162	4.26	0.21
molecular_function	GO:0005161	platelet-derived growth factor receptor binding	5	12	162	4.26	0.21
biological_process	GO:0042310	vasoconstriction	5	12	162	4.26	0.21
biological_process	GO:0010469	regulation of receptor activity	5	12	162	4.26	0.21
biological_process	GO:0001921	positive regulation of receptor recycling	5	12	162	4.26	0.21
biological_process	GO:0060384	innervation	5	12	162	4.26	0.21
biological_process	GO:0043277	apoptotic cell clearance	5	12	162	4.26	0.21
biological_process	GO:0043129	surfactant homeostasis	5	12	162	4.26	0.21
biological_process	GO:0030500	regulation of bone mineralization	5	12	162	4.26	0.21
biological_process	GO:0007276	gamete generation	5	12	162	4.26	0.21
biological_process	GO:0043691	reverse cholesterol transport	5	12	162	4.26	0.21
biological_process	GO:0048011	nerve growth factor receptor signaling pathway	5	12	162	4.26	0.21
biological_process	GO:0071320	cellular response to cAMP	5	12	162	4.26	0.21
molecular_function	GO:0046872	metal ion binding	5	13	162	3.93	0.21
molecular_function	GO:0008198	ferrous iron binding	5	13	162	3.93	0.21
biological_process	GO:0050773	regulation of dendrite development	5	13	162	3.93	0.21
biological_process	GO:0042692	muscle cell differentiation	5	13	162	3.93	0.21
biological_process	GO:0001833	inner cell mass cell proliferation	5	13	162	3.93	0.21
biological_process	GO:0042100	B cell proliferation	5	13	162	3.93	0.21
biological_process	GO:0070372	regulation of ERK1 and ERK2 cascade	5	13	162	3.93	0.21
biological_process	GO:0043032	positive regulation of macrophage activation	5	13	162	3.93	0.21
molecular_function	GO:0008143	poly(A) RNA binding	5	14	162	3.65	0.21
cellular_component	GO:0005671	Ada2/Gcn5/Ada3 transcription activator complex	5	14	162	3.65	0.21
cellular_component	GO:0048786	presynaptic active zone	5	14	162	3.65	0.21
biological_process	GO:0030889	negative regulation of B cell proliferation	5	14	162	3.65	0.21
biological_process	GO:0007140	male meiosis	5	14	162	3.65	0.21
biological_process	GO:0051482	elevation of cytosolic calcium ion concentration involved in phospholipase C-activating G-protein coupled signaling pathway	5	14	162	3.65	0.21
biological_process	GO:0045780	positive regulation of bone resorption	5	14	162	3.65	0.21
biological_process	GO:0040015	negative regulation of multicellular organism growth	5	14	162	3.65	0.21
biological_process	GO:0042325	regulation of phosphorylation	5	14	162	3.65	0.21
biological_process	GO:0042744	hydrogen peroxide catabolic process	5	14	162	3.65	0.21
biological_process	GO:0050910	detection of mechanical stimulus involved in sensory perception of sound	5	15	162	3.4	0.21
biological_process	GO:0014065	phosphatidylinositol 3-kinase cascade	5	15	162	3.4	0.21
biological_process	GO:0050775	positive regulation of dendrite morphogenesis	5	15	162	3.4	0.21
biological_process	GO:0032314	regulation of Rac GTPase activity	5	15	162	3.4	0.21
biological_process	GO:0046887	positive regulation of hormone secretion	5	15	162	3.4	0.21
biological_process	GO:0033554	cellular response to stress	5	16	162	3.19	0.21
biological_process	GO:0031290	retinal ganglion cell axon guidance	5	16	162	3.19	0.21
molecular_function	GO:0017022	myosin binding	5	17	162	3	0.21
molecular_function	GO:0015459	potassium channel regulator activity	5	17	162	3	0.21
cellular_component	GO:0032839	dendrite cytoplasm	5	17	162	3	0.21
biological_process	GO:0042462	eye photoreceptor cell development	5	17	162	3	0.21
biological_process	GO:0006284	base-excision repair	5	17	162	3	0.21
biological_process	GO:0070301	cellular response to hydrogen peroxide	5	17	162	3	0.21
biological_process	GO:0009409	response to cold	5	17	162	3	0.21
biological_process	GO:0001975	response to amphetamine	5	17	162	3	0.21
molecular_function	GO:0015485	cholesterol binding	5	18	162	2.84	0.21
molecular_function	GO:0005496	steroid binding	5	18	162	2.84	0.21
cellular_component	GO:0033267	axon part	5	18	162	2.84	0.21
biological_process	GO:0030301	cholesterol transport	5	18	162	2.84	0.21
biological_process	GO:0006509	membrane protein ectodomain proteolysis	5	18	162	2.84	0.21
biological_process	GO:0050772	positive regulation of axonogenesis	5	18	162	2.84	0.21
biological_process	GO:0006644	phospholipid metabolic process	5	18	162	2.84	0.21
biological_process	GO:0034605	cellular response to heat	5	18	162	2.84	0.21
biological_process	GO:0048265	response to pain	5	18	162	2.84	0.21
biological_process	GO:0043113	receptor clustering	5	18	162	2.84	0.21
biological_process	GO:0006513	protein monoubiquitination	5	19	162	2.69	0.21
biological_process	GO:0032321	positive regulation of Rho GTPase activity	5	19	162	2.69	0.21
biological_process	GO:0007031	peroxisome organization	5	19	162	2.69	0.21
biological_process	GO:0048066	developmental pigmentation	5	19	162	2.69	0.21
biological_process	GO:0030534	adult behavior	5	19	162	2.69	0.21
biological_process	GO:0006309	apoptotic DNA fragmentation	5	19	162	2.69	0.21
cellular_component	GO:0030057	desmosome	5	20	162	2.55	0.21
biological_process	GO:0050770	regulation of axonogenesis	5	20	162	2.55	0.21
biological_process	GO:0051225	spindle assembly	5	20	162	2.55	0.21
biological_process	GO:0045773	positive regulation of axon extension	5	20	162	2.55	0.21
biological_process	GO:0050804	regulation of synaptic transmission	5	20	162	2.55	0.21
biological_process	GO:0035235	ionotropic glutamate receptor signaling pathway	5	20	162	2.55	0.21
biological_process	GO:0051968	positive regulation of synaptic transmission, glutamatergic	5	20	162	2.55	0.21
biological_process	GO:0030010	establishment of cell polarity	5	20	162	2.55	0.21
molecular_function	GO:0035255	ionotropic glutamate receptor binding	5	21	162	2.43	0.21
cellular_component	GO:0001673	male germ cell nucleus	5	21	162	2.43	0.21
biological_process	GO:0001578	microtubule bundle formation	5	21	162	2.43	0.21
biological_process	GO:0007159	leukocyte cell-cell adhesion	5	21	162	2.43	0.21
biological_process	GO:0051297	centrosome organization	5	22	162	2.32	0.21
biological_process	GO:0006406	mRNA export from nucleus	5	22	162	2.32	0.21
cellular_component	GO:0005905	coated pit	5	23	162	2.22	0.21
cellular_component	GO:0015030	Cajal body	5	24	162	2.13	0.21
cellular_component	GO:0019005	SCF ubiquitin ligase complex	5	24	162	2.13	0.21
biological_process	GO:0050829	defense response to Gram-negative bacterium	5	24	162	2.13	0.21
molecular_function	GO:0015631	tubulin binding	5	25	162	2.04	0.21
biological_process	GO:0008277	regulation of G-protein coupled receptor protein signaling pathway	5	25	162	2.04	0.21
biological_process	GO:0006887	exocytosis	5	26	162	1.96	0.21
molecular_function	GO:0005262	calcium channel activity	5	27	162	1.89	0.21
biological_process	GO:0015758	glucose transport	5	27	162	1.89	0.21
molecular_function	GO:0005546	phosphatidylinositol-4,5-bisphosphate binding	5	28	162	1.82	0.21
molecular_function	GO:0004888	transmembrane signaling receptor activity	5	29	162	1.76	0.21
biological_process	GO:0042755	eating behavior	5	30	162	1.7	0.21
cellular_component	GO:0031234	extrinsic to internal side of plasma membrane	5	31	162	1.65	0.21
biological_process	GO:0006749	glutathione metabolic process	5	31	162	1.65	0.21
molecular_function	GO:0017046	peptide hormone binding	5	33	162	1.55	0.21
biological_process	GO:0030593	neutrophil chemotaxis	5	33	162	1.55	0.21
biological_process	GO:0014070	response to organic cyclic compound	5	33	162	1.55	0.21
cellular_component	GO:0014704	intercalated disc	5	34	162	1.5	0.21
cellular_component	GO:0005913	cell-cell adherens junction	5	36	162	1.42	0.21
biological_process	GO:0007628	adult walking behavior	5	36	162	1.42	0.21
cellular_component	GO:0030315	T-tubule	5	37	162	1.38	0.21
cellular_component	GO:0042734	presynaptic membrane	5	46	162	1.11	0.2
biological_process	GO:0006813	potassium ion transport	5	46	162	1.11	0.2
biological_process	GO:0007218	neuropeptide signaling pathway	5	48	162	1.06	0.2
molecular_function	GO:0004175	endopeptidase activity	5	49	162	1.04	0.2
biological_process	GO:0010923	negative regulation of phosphatase activity	5	50	162	1.02	0.2
molecular_function	GO:0004252	serine-type endopeptidase activity	5	51	162	1	0.2
biological_process	GO:0016192	vesicle-mediated transport	5	61	162	0.84	0.2
molecular_function	GO:0003735	structural constituent of ribosome	5	65	162	0.79	0.2
biological_process	GO:0030162	regulation of proteolysis	5	66	162	0.77	0.2
molecular_function	GO:0033142	progesterone receptor binding	4	4	162	10.21	0.17
molecular_function	GO:0070579	methylcytosine dioxygenase activity	4	4	162	10.21	0.17
molecular_function	GO:0045182	translation regulator activity	4	4	162	10.21	0.17
molecular_function	GO:0032813	tumor necrosis factor receptor superfamily binding	4	4	162	10.21	0.17
molecular_function	GO:0050693	LBD domain binding	4	4	162	10.21	0.17
molecular_function	GO:0034056	estrogen response element binding	4	4	162	10.21	0.17
molecular_function	GO:0030284	estrogen receptor activity	4	4	162	10.21	0.17
molecular_function	GO:0001159	core promoter proximal region DNA binding	4	4	162	10.21	0.17
molecular_function	GO:0031493	nucleosomal histone binding	4	4	162	10.21	0.17
molecular_function	GO:0035326	enhancer binding	4	4	162	10.21	0.17
molecular_function	GO:0032452	histone demethylase activity	4	4	162	10.21	0.17
molecular_function	GO:0033192	calmodulin-dependent protein phosphatase activity	4	4	162	10.21	0.17
molecular_function	GO:0005025	transforming growth factor beta receptor activity, type I	4	4	162	10.21	0.17
molecular_function	GO:0002151	G-quadruplex RNA binding	4	4	162	10.21	0.17
cellular_component	GO:0071141	SMAD protein complex	4	4	162	10.21	0.17
cellular_component	GO:0000125	PCAF complex	4	4	162	10.21	0.17
cellular_component	GO:0016602	CCAAT-binding factor complex	4	4	162	10.21	0.17
biological_process	GO:0030538	embryonic genitalia morphogenesis	4	4	162	10.21	0.17
biological_process	GO:0010757	negative regulation of plasminogen activation	4	4	162	10.21	0.17
biological_process	GO:0070265	necrotic cell death	4	4	162	10.21	0.17
biological_process	GO:0050856	regulation of T cell receptor signaling pathway	4	4	162	10.21	0.17
biological_process	GO:0061072	iris morphogenesis	4	4	162	10.21	0.17
biological_process	GO:0060214	endocardium formation	4	4	162	10.21	0.17
biological_process	GO:0003289	atrial septum primum morphogenesis	4	4	162	10.21	0.17
biological_process	GO:0072289	metanephric nephron tubule formation	4	4	162	10.21	0.17
biological_process	GO:0010887	negative regulation of cholesterol storage	4	4	162	10.21	0.17
biological_process	GO:0035065	regulation of histone acetylation	4	4	162	10.21	0.17
biological_process	GO:0001880	Mullerian duct regression	4	4	162	10.21	0.17
biological_process	GO:0032808	lacrimal gland development	4	4	162	10.21	0.17
biological_process	GO:0010837	regulation of keratinocyte proliferation	4	4	162	10.21	0.17
biological_process	GO:0060591	chondroblast differentiation	4	4	162	10.21	0.17
biological_process	GO:0045899	positive regulation of RNA polymerase II transcriptional preinitiation complex assembly	4	4	162	10.21	0.17
biological_process	GO:0021913	regulation of transcription from RNA polymerase II promoter involved in ventral spinal cord interneuron specification	4	4	162	10.21	0.17
biological_process	GO:0022037	metencephalon development	4	4	162	10.21	0.17
biological_process	GO:0045995	regulation of embryonic development	4	4	162	10.21	0.17
biological_process	GO:0010804	negative regulation of tumor necrosis factor-mediated signaling pathway	4	4	162	10.21	0.17
biological_process	GO:0007501	mesodermal cell fate specification	4	4	162	10.21	0.17
biological_process	GO:0010586	miRNA metabolic process	4	4	162	10.21	0.17
biological_process	GO:0008582	regulation of synaptic growth at neuromuscular junction	4	4	162	10.21	0.17
biological_process	GO:2000065	negative regulation of cortisol biosynthetic process	4	4	162	10.21	0.17
biological_process	GO:0050935	iridophore differentiation	4	4	162	10.21	0.17
biological_process	GO:0061198	fungiform papilla formation	4	4	162	10.21	0.17
biological_process	GO:0060977	coronary vasculature morphogenesis	4	4	162	10.21	0.17
biological_process	GO:0033129	positive regulation of histone phosphorylation	4	4	162	10.21	0.17
biological_process	GO:0060513	prostatic bud formation	4	4	162	10.21	0.17
biological_process	GO:0060018	astrocyte fate commitment	4	4	162	10.21	0.17
biological_process	GO:0022009	central nervous system vasculogenesis	4	4	162	10.21	0.17
biological_process	GO:0072091	regulation of stem cell proliferation	4	4	162	10.21	0.17
biological_process	GO:0021533	cell differentiation in hindbrain	4	4	162	10.21	0.17
biological_process	GO:0060913	cardiac cell fate determination	4	4	162	10.21	0.17
biological_process	GO:0061309	cardiac neural crest cell development involved in outflow tract morphogenesis	4	4	162	10.21	0.17
biological_process	GO:0014034	neural crest cell fate commitment	4	4	162	10.21	0.17
biological_process	GO:2000737	negative regulation of stem cell differentiation	4	4	162	10.21	0.17
biological_process	GO:0002740	negative regulation of cytokine secretion involved in immune response	4	4	162	10.21	0.17
biological_process	GO:0072108	positive regulation of mesenchymal to epithelial transition involved in metanephros morphogenesis	4	4	162	10.21	0.17
biological_process	GO:0060397	JAK-STAT cascade involved in growth hormone signaling pathway	4	4	162	10.21	0.17
biological_process	GO:0032057	negative regulation of translational initiation in response to stress	4	4	162	10.21	0.17
biological_process	GO:0071504	cellular response to heparin	4	4	162	10.21	0.17
biological_process	GO:0010954	positive regulation of protein processing	4	4	162	10.21	0.17
biological_process	GO:0045943	positive regulation of transcription from RNA polymerase I promoter	4	4	162	10.21	0.17
biological_process	GO:0033158	regulation of protein import into nucleus, translocation	4	4	162	10.21	0.17
biological_process	GO:0032792	negative regulation of CREB transcription factor activity	4	4	162	10.21	0.17
biological_process	GO:0060686	negative regulation of prostatic bud formation	4	4	162	10.21	0.17
biological_process	GO:0009957	epidermal cell fate specification	4	4	162	10.21	0.17
biological_process	GO:0071340	skeletal muscle acetylcholine-gated channel clustering	4	4	162	10.21	0.17
biological_process	GO:0070431	nucleotide-binding oligomerization domain containing 2 signaling pathway	4	4	162	10.21	0.17
biological_process	GO:0035279	mRNA cleavage involved in gene silencing by miRNA	4	4	162	10.21	0.17
biological_process	GO:0048937	lateral line nerve glial cell development	4	4	162	10.21	0.17
biological_process	GO:0003334	keratinocyte development	4	4	162	10.21	0.17
biological_process	GO:0003195	tricuspid valve formation	4	4	162	10.21	0.17
biological_process	GO:0032909	regulation of transforming growth factor beta2 production	4	4	162	10.21	0.17
biological_process	GO:0031047	gene silencing by RNA	4	4	162	10.21	0.17
biological_process	GO:0007442	hindgut morphogenesis	4	4	162	10.21	0.17
biological_process	GO:0060033	anatomical structure regression	4	4	162	10.21	0.17
biological_process	GO:0060164	regulation of timing of neuron differentiation	4	4	162	10.21	0.17
biological_process	GO:0045918	negative regulation of cytolysis	4	4	162	10.21	0.17
biological_process	GO:0051782	negative regulation of cell division	4	4	162	10.21	0.17
biological_process	GO:0051155	positive regulation of striated muscle cell differentiation	4	4	162	10.21	0.17
biological_process	GO:0043405	regulation of MAP kinase activity	4	4	162	10.21	0.17
biological_process	GO:0043374	CD8-positive, alpha-beta T cell differentiation	4	4	162	10.21	0.17
biological_process	GO:0021940	positive regulation of cerebellar granule cell precursor proliferation	4	4	162	10.21	0.17
biological_process	GO:0003257	positive regulation of transcription from RNA polymerase II promoter involved in myocardial precursor cell differentiation	4	4	162	10.21	0.17
biological_process	GO:0038031	non-canonical Wnt receptor signaling pathway via JNK cascade	4	4	162	10.21	0.17
biological_process	GO:0050434	positive regulation of viral transcription	4	4	162	10.21	0.17
biological_process	GO:0060318	definitive erythrocyte differentiation	4	4	162	10.21	0.17
biological_process	GO:0060964	regulation of gene silencing by miRNA	4	4	162	10.21	0.17
biological_process	GO:0032348	negative regulation of aldosterone biosynthetic process	4	4	162	10.21	0.17
biological_process	GO:0043049	otic placode formation	4	4	162	10.21	0.17
biological_process	GO:0042662	negative regulation of mesodermal cell fate specification	4	4	162	10.21	0.17
biological_process	GO:0060528	secretory columnal luminar epithelial cell differentiation involved in prostate glandular acinus development	4	4	162	10.21	0.17
biological_process	GO:2000637	positive regulation of gene silencing by miRNA	4	4	162	10.21	0.17
biological_process	GO:0003192	mitral valve formation	4	4	162	10.21	0.17
biological_process	GO:0010724	regulation of definitive erythrocyte differentiation	4	4	162	10.21	0.17
biological_process	GO:0008078	mesodermal cell migration	4	4	162	10.21	0.17
biological_process	GO:0048343	paraxial mesodermal cell fate commitment	4	4	162	10.21	0.17
biological_process	GO:2001260	regulation of semaphorin-plexin signaling pathway	4	4	162	10.21	0.17
biological_process	GO:0033088	negative regulation of immature T cell proliferation in thymus	4	4	162	10.21	0.17
biological_process	GO:0032786	positive regulation of DNA-dependent transcription, elongation	4	4	162	10.21	0.17
biological_process	GO:2000774	positive regulation of cellular senescence	4	4	162	10.21	0.17
biological_process	GO:0072162	metanephric mesenchymal cell differentiation	4	4	162	10.21	0.17
biological_process	GO:0035426	extracellular matrix-cell signaling	4	4	162	10.21	0.17
biological_process	GO:0061030	epithelial cell differentiation involved in mammary gland alveolus development	4	4	162	10.21	0.17
biological_process	GO:0032330	regulation of chondrocyte differentiation	4	4	162	10.21	0.17
biological_process	GO:0045814	negative regulation of gene expression, epigenetic	4	4	162	10.21	0.17
biological_process	GO:0072164	mesonephric tubule development	4	4	162	10.21	0.17
biological_process	GO:0003183	mitral valve morphogenesis	4	4	162	10.21	0.17
biological_process	GO:0033144	negative regulation of intracellular steroid hormone receptor signaling pathway	4	4	162	10.21	0.17
biological_process	GO:0043153	entrainment of circadian clock by photoperiod	4	4	162	10.21	0.17
biological_process	GO:0003266	regulation of secondary heart field cardioblast proliferation	4	4	162	10.21	0.17
biological_process	GO:0070734	histone H3-K27 methylation	4	4	162	10.21	0.17
biological_process	GO:0035912	dorsal aorta morphogenesis	4	4	162	10.21	0.17
biological_process	GO:0072107	positive regulation of ureteric bud formation	4	4	162	10.21	0.17
biological_process	GO:0033120	positive regulation of RNA splicing	4	4	162	10.21	0.17
biological_process	GO:0044030	regulation of DNA methylation	4	4	162	10.21	0.17
biological_process	GO:0021938	smoothened signaling pathway involved in regulation of cerebellar granule cell precursor cell proliferation	4	4	162	10.21	0.17
biological_process	GO:0003357	noradrenergic neuron differentiation	4	4	162	10.21	0.17
biological_process	GO:2001028	positive regulation of endothelial cell chemotaxis	4	4	162	10.21	0.17
biological_process	GO:0060956	endocardial cell differentiation	4	4	162	10.21	0.17
biological_process	GO:0070613	regulation of protein processing	4	4	162	10.21	0.17
biological_process	GO:0001710	mesodermal cell fate commitment	4	4	162	10.21	0.17
biological_process	GO:0021978	telencephalon regionalization	4	4	162	10.21	0.17
biological_process	GO:0050684	regulation of mRNA processing	4	4	162	10.21	0.17
biological_process	GO:0010936	negative regulation of macrophage cytokine production	4	4	162	10.21	0.17
biological_process	GO:0003219	cardiac right ventricle formation	4	4	162	10.21	0.17
biological_process	GO:0060129	thyroid-stimulating hormone-secreting cell differentiation	4	4	162	10.21	0.17
biological_process	GO:0001839	neural plate morphogenesis	4	4	162	10.21	0.17
biological_process	GO:0021559	trigeminal nerve development	4	4	162	10.21	0.17
biological_process	GO:0035799	ureter maturation	4	4	162	10.21	0.17
molecular_function	GO:0032453	histone demethylase activity (H3-K4 specific)	4	5	162	8.17	0.17
molecular_function	GO:0008140	cAMP response element binding protein binding	4	5	162	8.17	0.17
molecular_function	GO:0030375	thyroid hormone receptor coactivator activity	4	5	162	8.17	0.17
molecular_function	GO:0030957	Tat protein binding	4	5	162	8.17	0.17
molecular_function	GO:0005031	tumor necrosis factor-activated receptor activity	4	5	162	8.17	0.17
molecular_function	GO:0008190	eukaryotic initiation factor 4E binding	4	5	162	8.17	0.17
molecular_function	GO:0044323	retinoic acid-responsive element binding	4	5	162	8.17	0.17
molecular_function	GO:0034711	inhibin binding	4	5	162	8.17	0.17
cellular_component	GO:0071546	pi-body	4	5	162	8.17	0.17
biological_process	GO:0032713	negative regulation of interleukin-4 production	4	5	162	8.17	0.17
biological_process	GO:0034116	positive regulation of heterotypic cell-cell adhesion	4	5	162	8.17	0.17
biological_process	GO:0021695	cerebellar cortex development	4	5	162	8.17	0.17
[truncated: 5,510 more rows]

## Sheet: PomBase
Namespace	GO_ID	GO_Name	Together	TermCount	SubjectCount	Score(PR)	Score(S%)
biological_process	GO:0006357	regulation of transcription from RNA polymerase II promoter	146	146	1	13.33	36.78
molecular_function	GO:0000978	RNA polymerase II core promoter proximal region sequence-specific DNA binding	91	91	1	13.33	22.92
molecular_function	GO:0003677	DNA binding	78	114	1	9.12	18.01
biological_process	GO:0006355	regulation of transcription, DNA-dependent	70	70	1	13.33	17.63
cellular_component	GO:0000790	nuclear chromatin	83	159	1	6.96	17.55
biological_process	GO:0006338	chromatin remodeling	76	138	1	7.34	16.56
molecular_function	GO:0000981	sequence-specific DNA binding RNA polymerase II transcription factor activity	50	50	1	13.33	12.59
biological_process	GO:0030702	chromatin silencing at centromere	50	50	1	13.33	12.59
cellular_component	GO:0005634	nucleus	312	2402	1	1.73	12.55
molecular_function	GO:0005515	protein binding	92	542	1	2.26	10.86
molecular_function	GO:0008270	zinc ion binding	42	109	1	5.14	9.05
biological_process	GO:0000122	negative regulation of transcription from RNA polymerase II promoter	33	33	1	13.33	8.31
biological_process	GO:0030466	chromatin silencing at silent mating-type cassette	31	31	1	13.33	7.81
cellular_component	GO:0005829	cytosol	188	2237	1	1.12	7.69
biological_process	GO:0045944	positive regulation of transcription from RNA polymerase II promoter	29	29	1	13.33	7.3
biological_process	GO:0006342	chromatin silencing	26	26	1	13.33	6.55
biological_process	GO:0000070	mitotic sister chromatid segregation	30	99	1	4.04	6.44
cellular_component	GO:0005737	cytoplasm	79	1181	1	0.89	5.27
biological_process	GO:0006348	chromatin silencing at telomere	19	19	1	13.33	4.79
cellular_component	GO:0016592	mediator complex	18	21	1	11.42	4.5
biological_process	GO:0016575	histone deacetylation	18	25	1	9.6	4.46
biological_process	GO:0016573	histone acetylation	18	37	1	6.48	4.33
cellular_component	GO:0031934	mating-type region heterochromatin	17	18	1	12.59	4.27
cellular_component	GO:0005816	spindle pole body	24	217	1	1.47	4.07
biological_process	GO:0034613	cellular protein localization	20	116	1	2.3	4.06
biological_process	GO:2000765	regulation of cytoplasmic translation	15	15	1	13.33	3.78
biological_process	GO:0031048	chromatin silencing by small RNA	14	14	1	13.33	3.53
cellular_component	GO:0005721	centromeric heterochromatin	14	15	1	12.44	3.52
biological_process	GO:0006468	protein phosphorylation	16	106	1	2.01	3.29
biological_process	GO:0000723	telomere maintenance	14	44	1	4.24	3.28
molecular_function	GO:0003714	transcription corepressor activity	13	13	1	13.33	3.27
cellular_component	GO:0005819	spindle	14	69	1	2.7	3.1
cellular_component	GO:0016586	RSC complex	12	13	1	12.3	3.02
molecular_function	GO:0003723	RNA binding	15	118	1	1.69	3
cellular_component	GO:0032221	Rpd3S complex	12	16	1	10	2.99
molecular_function	GO:0005524	ATP binding	18	253	1	0.95	2.85
biological_process	GO:0006366	transcription from RNA polymerase II promoter	12	37	1	4.32	2.84
biological_process	GO:0033554	cellular response to stress	19	302	1	0.84	2.79
biological_process	GO:0045014	negative regulation of transcription by glucose	11	11	1	13.33	2.77
biological_process	GO:0007346	regulation of mitotic cell cycle	14	122	1	1.53	2.77
cellular_component	GO:0016514	SWI/SNF complex	11	12	1	12.22	2.76
cellular_component	GO:0070210	Rpd3L-Expanded complex	11	15	1	9.77	2.74
biological_process	GO:0007165	signal transduction	13	114	1	1.52	2.61
molecular_function	GO:0004842	ubiquitin-protein ligase activity	12	80	1	2	2.58
biological_process	GO:0002183	cytoplasmic translational initiation	11	43	1	3.41	2.56
molecular_function	GO:0043565	sequence-specific DNA binding	10	10	1	13.33	2.52
cellular_component	GO:0000785	chromatin	10	18	1	7.4	2.47
biological_process	GO:0043486	histone exchange	10	20	1	6.66	2.46
biological_process	GO:0006368	transcription elongation from RNA polymerase II promoter	10	26	1	5.13	2.42
biological_process	GO:0002182	cytoplasmic translational elongation	10	36	1	3.7	2.36
biological_process	GO:0006974	response to DNA damage stimulus	10	39	1	3.42	2.35
biological_process	GO:0000183	chromatin silencing at rDNA	9	9	1	13.33	2.27
cellular_component	GO:0005724	nuclear telomeric heterochromatin	9	10	1	11.99	2.26
molecular_function	GO:0001104	RNA polymerase II transcription cofactor activity	9	11	1	10.9	2.26
biological_process	GO:0016567	protein ubiquitination	11	100	1	1.47	2.26
cellular_component	GO:0016585	chromatin remodeling complex	9	15	1	8	2.23
cellular_component	GO:0000124	SAGA complex	9	19	1	6.31	2.21
biological_process	GO:0006200	ATP catabolic process	12	166	1	0.96	2.18
cellular_component	GO:0005730	nucleolus	14	299	1	0.62	2.05
biological_process	GO:0031060	regulation of histone methylation	8	8	1	13.33	2.02
biological_process	GO:0045896	regulation of transcription during mitosis	8	8	1	13.33	2.02
biological_process	GO:0051570	regulation of histone H3-K9 methylation	8	8	1	13.33	2.02
biological_process	GO:0006336	DNA replication-independent nucleosome assembly	8	9	1	11.85	2.01
cellular_component	GO:0035267	NuA4 histone acetyltransferase complex	8	13	1	8.2	1.99
biological_process	GO:0045141	meiotic telomere clustering	8	13	1	8.2	1.99
molecular_function	GO:0019787	small conjugating protein ligase activity	8	20	1	5.33	1.96
biological_process	GO:0006995	cellular response to nitrogen starvation	8	42	1	2.54	1.86
cellular_component	GO:0030907	MBF transcription complex	7	7	1	13.33	1.76
biological_process	GO:0034243	regulation of transcription elongation from RNA polymerase II promoter	7	7	1	13.33	1.76
biological_process	GO:0070816	phosphorylation of RNA polymerase II C-terminal domain	7	7	1	13.33	1.76
biological_process	GO:0006109	regulation of carbohydrate metabolic process	7	7	1	13.33	1.76
cellular_component	GO:0043234	protein complex	8	94	1	1.13	1.66
molecular_function	GO:0000991	core RNA polymerase II binding transcription factor activity	7	34	1	2.74	1.65
cellular_component	GO:0043494	CLRC ubiquitin ligase complex	6	6	1	13.33	1.51
biological_process	GO:0060303	regulation of nucleosome density	6	6	1	13.33	1.51
biological_process	GO:0051037	regulation of transcription during meiosis	6	6	1	13.33	1.51
biological_process	GO:0051574	positive regulation of histone H3-K9 methylation	6	6	1	13.33	1.51
biological_process	GO:0045893	positive regulation of transcription, DNA-dependent	6	6	1	13.33	1.51
biological_process	GO:0051039	positive regulation of transcription during meiosis	6	6	1	13.33	1.51
biological_process	GO:0000083	regulation of transcription involved in G1/S phase of mitotic cell cycle	6	6	1	13.33	1.51
cellular_component	GO:0031933	telomeric heterochromatin	6	7	1	11.42	1.51
cellular_component	GO:0031618	nuclear centromeric heterochromatin	6	7	1	11.42	1.51
biological_process	GO:0030437	ascospore formation	7	75	1	1.24	1.51
cellular_component	GO:0030015	CCR4-NOT core complex	6	8	1	10	1.5
molecular_function	GO:0042393	histone binding	6	10	1	8	1.5
biological_process	GO:0019933	cAMP-mediated signaling	6	11	1	7.27	1.49
biological_process	GO:0006334	nucleosome assembly	6	12	1	6.66	1.49
cellular_component	GO:0000812	Swr1 complex	6	15	1	5.33	1.48
biological_process	GO:0006402	mRNA catabolic process	6	18	1	4.44	1.47
biological_process	GO:0006360	transcription from RNA polymerase I promoter	6	25	1	3.2	1.44
biological_process	GO:0034605	cellular response to heat	6	34	1	2.35	1.41
biological_process	GO:0051519	activation of bipolar cell growth	6	41	1	1.95	1.39
biological_process	GO:0006457	protein folding	6	51	1	1.57	1.36
biological_process	GO:0034599	cellular response to oxidative stress	6	53	1	1.51	1.35
molecular_function	GO:0001078	RNA polymerase II core promoter proximal region sequence-specific DNA binding transcription factor activity involved in negative regulation of transcription	5	5	1	13.33	1.26
molecular_function	GO:0019237	centromeric DNA binding	5	5	1	13.33	1.26
cellular_component	GO:0033553	rDNA heterochromatin	5	5	1	13.33	1.26
biological_process	GO:0016577	histone demethylation	5	5	1	13.33	1.26
biological_process	GO:0031047	gene silencing by RNA	5	5	1	13.33	1.26
biological_process	GO:0010673	positive regulation of transcription from RNA polymerase II promoter during meiosis	5	5	1	13.33	1.26
biological_process	GO:2000766	negative regulation of cytoplasmic translation	5	5	1	13.33	1.26
biological_process	GO:0051572	negative regulation of histone H3-K4 methylation	5	5	1	13.33	1.26
molecular_function	GO:0004693	cyclin-dependent protein kinase activity	5	6	1	11.11	1.26
cellular_component	GO:0032153	cell division site	8	248	1	0.43	1.26
biological_process	GO:0030261	chromosome condensation	5	8	1	8.33	1.25
biological_process	GO:0070301	cellular response to hydrogen peroxide	5	9	1	7.4	1.25
biological_process	GO:0018022	peptidyl-lysine methylation	5	13	1	5.13	1.23
cellular_component	GO:0000781	chromosome, telomeric region	5	20	1	3.33	1.21
biological_process	GO:0000077	DNA damage checkpoint	5	25	1	2.67	1.2
biological_process	GO:0031137	regulation of conjugation with cellular fusion	5	26	1	2.56	1.2
molecular_function	GO:0004003	ATP-dependent DNA helicase activity	5	28	1	2.38	1.19
molecular_function	GO:0003743	translation initiation factor activity	5	28	1	2.38	1.19
biological_process	GO:0000747	conjugation with cellular fusion	5	32	1	2.08	1.18
biological_process	GO:0006470	protein dephosphorylation	5	33	1	2.02	1.18
biological_process	GO:0006281	DNA repair	5	50	1	1.33	1.13
molecular_function	GO:0016887	ATPase activity	5	65	1	1.03	1.09
biological_process	GO:0007126	meiosis	5	68	1	0.98	1.09
molecular_function	GO:0032452	histone demethylase activity	4	4	1	13.33	1.01
molecular_function	GO:0003713	transcription coactivator activity	4	4	1	13.33	1.01
cellular_component	GO:0000417	HIR complex	4	4	1	13.33	1.01
cellular_component	GO:0071458	integral to cytosolic side of endoplasmic reticulum membrane	4	4	1	13.33	1.01
cellular_component	GO:0016581	NuRD complex	4	4	1	13.33	1.01
cellular_component	GO:0030014	CCR4-NOT complex	4	4	1	13.33	1.01
cellular_component	GO:0033503	HULC complex	4	4	1	13.33	1.01
cellular_component	GO:0016602	CCAAT-binding factor complex	4	4	1	13.33	1.01
biological_process	GO:0032015	regulation of Ran protein signal transduction	4	4	1	13.33	1.01
biological_process	GO:0090052	regulation of chromatin silencing at centromere	4	4	1	13.33	1.01
biological_process	GO:0071894	histone H2B conserved C-terminal lysine ubiquitination	4	4	1	13.33	1.01
biological_process	GO:0035067	negative regulation of histone acetylation	4	4	1	13.33	1.01
biological_process	GO:0007535	donor selection	4	4	1	13.33	1.01
biological_process	GO:0035391	maintenance of chromatin silencing at silent mating-type cassette	4	4	1	13.33	1.01
biological_process	GO:0006335	DNA replication-dependent nucleosome assembly	4	4	1	13.33	1.01
biological_process	GO:0006448	regulation of translational elongation	4	4	1	13.33	1.01
biological_process	GO:0043555	regulation of translation in response to stress	4	4	1	13.33	1.01
biological_process	GO:0032933	SREBP signaling pathway	4	4	1	13.33	1.01
biological_process	GO:0006446	regulation of translational initiation	4	4	1	13.33	1.01
cellular_component	GO:0033698	Rpd3L complex	4	5	1	10.66	1.01
cellular_component	GO:0000408	EKC/KEOPS complex	4	5	1	10.66	1.01
biological_process	GO:0071456	cellular response to hypoxia	4	5	1	10.66	1.01
cellular_component	GO:0000775	chromosome, centromeric region	4	6	1	8.88	1
cellular_component	GO:0000780	condensed nuclear chromosome, centromeric region	4	6	1	8.88	1
biological_process	GO:0040020	regulation of meiosis	4	6	1	8.88	1
molecular_function	GO:0008143	poly(A) RNA binding	4	7	1	7.62	1
molecular_function	GO:0043022	ribosome binding	4	7	1	7.62	1
biological_process	GO:0010811	positive regulation of cell-substrate adhesion	4	7	1	7.62	1
biological_process	GO:0006354	DNA-dependent transcription, elongation	4	7	1	7.62	1
biological_process	GO:0000289	nuclear-transcribed mRNA poly(A) tail shortening	4	8	1	6.66	1
biological_process	GO:0031138	negative regulation of conjugation with cellular fusion	4	8	1	6.66	1
biological_process	GO:0002184	cytoplasmic translational termination	4	9	1	5.92	1
cellular_component	GO:0005739	mitochondrion	10	609	1	0.22	1
biological_process	GO:0010590	regulation of cytokinetic cell separation	4	10	1	5.33	0.99
cellular_component	GO:0000932	cytoplasmic mRNA processing body	4	11	1	4.85	0.99
cellular_component	GO:0031011	Ino80 complex	4	15	1	3.55	0.98
biological_process	GO:0030148	sphingolipid biosynthetic process	4	16	1	3.33	0.98
molecular_function	GO:0003729	mRNA binding	4	23	1	2.32	0.96
biological_process	GO:0071470	cellular response to osmotic stress	4	24	1	2.22	0.96
molecular_function	GO:0042803	protein homodimerization activity	4	25	1	2.13	0.96
biological_process	GO:0006413	translational initiation	4	35	1	1.52	0.93
biological_process	GO:0045132	meiotic chromosome segregation	4	35	1	1.52	0.93
cellular_component	GO:0043596	nuclear replication fork	4	49	1	1.09	0.9
biological_process	GO:0007131	reciprocal meiotic recombination	4	49	1	1.09	0.9
cellular_component	GO:0022626	cytosolic ribosome	4	54	1	0.99	0.89
cellular_component	GO:0005635	nuclear envelope	4	91	1	0.59	0.83
cellular_component	GO:0005783	endoplasmic reticulum	7	513	1	0.18	0.78
molecular_function	GO:0004694	eukaryotic translation initiation factor 2alpha kinase activity	3	3	1	13.33	0.76
molecular_function	GO:0008353	RNA polymerase II carboxy-terminal domain kinase activity	3	3	1	13.33	0.76
molecular_function	GO:0031493	nucleosomal histone binding	3	3	1	13.33	0.76
molecular_function	GO:0004407	histone deacetylase activity	3	3	1	13.33	0.76
cellular_component	GO:0008024	positive transcription elongation factor complex b	3	3	1	13.33	0.76
cellular_component	GO:0030958	RITS complex	3	3	1	13.33	0.76
cellular_component	GO:0031380	nuclear RNA-directed RNA polymerase complex	3	3	1	13.33	0.76
cellular_component	GO:0005720	nuclear heterochromatin	3	3	1	13.33	0.76
cellular_component	GO:0032806	carboxy-terminal domain protein kinase complex	3	3	1	13.33	0.76
cellular_component	GO:0033186	CAF-1 complex	3	3	1	13.33	0.76
cellular_component	GO:0033167	ARC complex	3	3	1	13.33	0.76
cellular_component	GO:0032936	SREBP-SCAP complex	3	3	1	13.33	0.76
biological_process	GO:0033168	conversion of ds siRNA to ss siRNA involved in RNA interference	3	3	1	13.33	0.76
biological_process	GO:0010674	negative regulation of transcription from RNA polymerase II promoter during meiosis	3	3	1	13.33	0.76
biological_process	GO:0048255	mRNA stabilization	3	3	1	13.33	0.76
biological_process	GO:0016570	histone modification	3	3	1	13.33	0.76
biological_process	GO:0045892	negative regulation of transcription, DNA-dependent	3	3	1	13.33	0.76
biological_process	GO:0090055	positive regulation of chromatin silencing at silent mating-type cassette	3	3	1	13.33	0.76
biological_process	GO:2000815	regulation of mRNA stability involved in response to oxidative stress	3	3	1	13.33	0.76
biological_process	GO:0071243	cellular response to arsenic-containing substance	3	3	1	13.33	0.76
biological_process	GO:0016584	nucleosome positioning	3	3	1	13.33	0.76
biological_process	GO:0090053	positive regulation of chromatin silencing at centromere	3	3	1	13.33	0.76
biological_process	GO:0010848	regulation of chromatin disassembly	3	3	1	13.33	0.76
biological_process	GO:0043971	histone H3-K18 acetylation	3	3	1	13.33	0.76
biological_process	GO:0001932	regulation of protein phosphorylation	3	3	1	13.33	0.76
biological_process	GO:0007188	adenylate cyclase-modulating G-protein coupled receptor signaling pathway	3	3	1	13.33	0.76
biological_process	GO:0010520	regulation of reciprocal meiotic recombination	3	3	1	13.33	0.76
biological_process	GO:0044154	histone H3-K14 acetylation	3	3	1	13.33	0.76
biological_process	GO:0043972	histone H3-K23 acetylation	3	3	1	13.33	0.76
biological_process	GO:0010847	regulation of chromatin assembly	3	3	1	13.33	0.76
biological_process	GO:0010620	negative regulation of transcription by transcription factor catabolism	3	3	1	13.33	0.76
biological_process	GO:0070829	heterochromatin maintenance	3	3	1	13.33	0.76
biological_process	GO:0031507	heterochromatin assembly	3	3	1	13.33	0.76
biological_process	GO:0031497	chromatin assembly	3	3	1	13.33	0.76
biological_process	GO:0043970	histone H3-K9 acetylation	3	3	1	13.33	0.76
biological_process	GO:0043949	regulation of cAMP-mediated signaling	3	3	1	13.33	0.76
biological_process	GO:0035065	regulation of histone acetylation	3	3	1	13.33	0.76
biological_process	GO:0045903	positive regulation of translational fidelity	3	3	1	13.33	0.76
biological_process	GO:0007070	negative regulation of transcription from RNA polymerase II promoter during mitosis	3	3	1	13.33	0.76
biological_process	GO:0007190	activation of adenylate cyclase activity	3	3	1	13.33	0.76
molecular_function	GO:0031491	nucleosome binding	3	4	1	10	0.75
molecular_function	GO:0046983	protein dimerization activity	3	4	1	10	0.75
molecular_function	GO:0001169	RNA polymerase I CORE element sequence-specific DNA binding transcription factor activity	3	4	1	10	0.75
cellular_component	GO:0033193	Lsd1/2 complex	3	4	1	10	0.75
cellular_component	GO:0005667	transcription factor complex	3	4	1	10	0.75
biological_process	GO:0033169	histone H3-K9 demethylation	3	4	1	10	0.75
cellular_component	GO:0000120	RNA polymerase I transcription factor complex	3	5	1	8	0.75
cellular_component	GO:0005834	heterotrimeric G-protein complex	3	5	1	8	0.75
cellular_component	GO:0048189	Lid2 complex	3	5	1	8	0.75
cellular_component	GO:0005851	eukaryotic translation initiation factor 2B complex	3	5	1	8	0.75
biological_process	GO:0031565	cytokinesis checkpoint	3	5	1	8	0.75
biological_process	GO:0017183	peptidyl-diphthamide biosynthetic process from peptidyl-histidine	3	5	1	8	0.75
molecular_function	GO:0003712	transcription cofactor activity	3	6	1	6.66	0.75
cellular_component	GO:0000788	nuclear nucleosome	3	6	1	6.66	0.75
biological_process	GO:0034504	protein localization to nucleus	3	6	1	6.66	0.75
molecular_function	GO:0003755	peptidyl-prolyl cis-trans isomerase activity	3	7	1	5.71	0.75
biological_process	GO:0031124	mRNA 3'-end processing	3	7	1	5.71	0.75
biological_process	GO:0001934	positive regulation of protein phosphorylation	3	7	1	5.71	0.75
biological_process	GO:0031031	positive regulation of septation initiation signaling cascade	3	7	1	5.71	0.75
biological_process	GO:0070314	G1 to G0 transition	3	8	1	5	0.75
biological_process	GO:0071473	cellular response to cation stress	3	9	1	4.44	0.74
biological_process	GO:0034080	CENP-A containing nucleosome assembly at centromere	3	9	1	4.44	0.74
biological_process	GO:0007089	traversing start control point of mitotic cell cycle	3	9	1	4.44	0.74
biological_process	GO:0031670	cellular response to nutrient	3	9	1	4.44	0.74
biological_process	GO:0031142	induction of conjugation upon nitrogen starvation	3	11	1	3.63	0.74
biological_process	GO:0043085	positive regulation of catalytic activity	3	11	1	3.63	0.74
biological_process	GO:0006397	mRNA processing	3	11	1	3.63	0.74
molecular_function	GO:0016538	cyclin-dependent protein kinase regulator activity	3	12	1	3.33	0.74
cellular_component	GO:0000939	condensed chromosome inner kinetochore	3	14	1	2.86	0.74
biological_process	GO:0000079	regulation of cyclin-dependent protein kinase activity	3	14	1	2.86	0.74
molecular_function	GO:0005085	guanyl-nucleotide exchange factor activity	3	15	1	2.67	0.73
molecular_function	GO:0008094	DNA-dependent ATPase activity	3	15	1	2.67	0.73
molecular_function	GO:0008757	S-adenosylmethionine-dependent methyltransferase activity	3	15	1	2.67	0.73
molecular_function	GO:0003697	single-stranded DNA binding	3	15	1	2.67	0.73
cellular_component	GO:0000779	condensed chromosome, centromeric region	3	17	1	2.35	0.73
biological_process	GO:0031134	sister chromatid biorientation	3	17	1	2.35	0.73
biological_process	GO:0010389	regulation of G2/M transition of mitotic cell cycle	3	18	1	2.22	0.73
biological_process	GO:0071775	regulation of cell cycle cytokinesis	3	23	1	1.74	0.72
biological_process	GO:0008360	regulation of cell shape	3	29	1	1.38	0.71
biological_process	GO:0000002	mitochondrial genome maintenance	3	29	1	1.38	0.71
biological_process	GO:0006406	mRNA export from nucleus	3	30	1	1.33	0.71
molecular_function	GO:0046982	protein heterodimerization activity	3	41	1	0.98	0.69
cellular_component	GO:0005759	mitochondrial matrix	3	60	1	0.67	0.66
molecular_function	GO:0004674	protein serine/threonine kinase activity	3	81	1	0.49	0.63
cellular_component	GO:0005886	plasma membrane	3	101	1	0.4	0.61
biological_process	GO:0055114	oxidation-reduction process	3	168	1	0.24	0.53
molecular_function	GO:0032129	histone deacetylase activity (H3-K9 specific)	2	2	1	13.33	0.5
molecular_function	GO:0034647	histone demethylase activity (H3-trimethyl-K4 specific)	2	2	1	13.33	0.5
molecular_function	GO:0045182	translation regulator activity	2	2	1	13.33	0.5
molecular_function	GO:0019912	cyclin-dependent protein kinase activating kinase activity	2	2	1	13.33	0.5
molecular_function	GO:0034649	histone demethylase activity (H3-monomethyl-K4 specific)	2	2	1	13.33	0.5
molecular_function	GO:0010844	recombination hotspot binding	2	2	1	13.33	0.5
molecular_function	GO:0008420	CTD phosphatase activity	2	2	1	13.33	0.5
molecular_function	GO:0017136	NAD-dependent histone deacetylase activity	2	2	1	13.33	0.5
molecular_function	GO:0051864	histone demethylase activity (H3-K36 specific)	2	2	1	13.33	0.5
cellular_component	GO:0031379	RNA-directed RNA polymerase complex	2	2	1	13.33	0.5
cellular_component	GO:0032044	DSIF complex	2	2	1	13.33	0.5
cellular_component	GO:0032783	ELL-EAF complex	2	2	1	13.33	0.5
biological_process	GO:0033217	regulation of transcription from RNA polymerase II promoter in response to iron ion starvation	2	2	1	13.33	0.5
biological_process	GO:0045905	positive regulation of translational termination	2	2	1	13.33	0.5
biological_process	GO:0034721	histone H3-K4 demethylation, trimethyl-H3-K4-specific	2	2	1	13.33	0.5
biological_process	GO:0070935	3'-UTR-mediated mRNA stabilization	2	2	1	13.33	0.5
biological_process	GO:0006450	regulation of translational fidelity	2	2	1	13.33	0.5
biological_process	GO:0071073	positive regulation of phospholipid biosynthetic process	2	2	1	13.33	0.5
biological_process	GO:0031647	regulation of protein stability	2	2	1	13.33	0.5
biological_process	GO:0050821	protein stabilization	2	2	1	13.33	0.5
biological_process	GO:0043561	regulation of translational initiation in response to osmotic stress	2	2	1	13.33	0.5
biological_process	GO:0043433	negative regulation of sequence-specific DNA binding transcription factor activity	2	2	1	13.33	0.5
biological_process	GO:0034720	histone H3-K4 demethylation	2	2	1	13.33	0.5
biological_process	GO:0051783	regulation of nuclear division	2	2	1	13.33	0.5
biological_process	GO:0048096	chromatin-mediated maintenance of transcription	2	2	1	13.33	0.5
biological_process	GO:0070544	histone H3-K36 demethylation	2	2	1	13.33	0.5
biological_process	GO:0030422	production of siRNA involved in RNA interference	2	2	1	13.33	0.5
biological_process	GO:0090375	negative regulation of transcription from RNA polymerase II promoter in response to iron ion starvation	2	2	1	13.33	0.5
biological_process	GO:0031494	regulation of mating type switching	2	2	1	13.33	0.5
biological_process	GO:0070452	positive regulation of ergosterol biosynthetic process	2	2	1	13.33	0.5
biological_process	GO:0035389	establishment of chromatin silencing at silent mating-type cassette	2	2	1	13.33	0.5
biological_process	GO:0031575	mitotic cell cycle G1/S transition checkpoint	2	2	1	13.33	0.5
biological_process	GO:0010629	negative regulation of gene expression	2	2	1	13.33	0.5
biological_process	GO:0035437	maintenance of protein localization in endoplasmic reticulum	2	2	1	13.33	0.5
biological_process	GO:0007049	cell cycle	2	2	1	13.33	0.5
biological_process	GO:0034244	negative regulation of transcription elongation from RNA polymerase II promoter	2	2	1	13.33	0.5
biological_process	GO:0035103	sterol regulatory element binding protein cleavage	2	2	1	13.33	0.5
biological_process	GO:0051038	negative regulation of transcription during meiosis	2	2	1	13.33	0.5
biological_process	GO:0051567	histone H3-K9 methylation	2	2	1	13.33	0.5
biological_process	GO:0043044	ATP-dependent chromatin remodeling	2	2	1	13.33	0.5
biological_process	GO:0032968	positive regulation of transcription elongation from RNA polymerase II promoter	2	2	1	13.33	0.5
biological_process	GO:0006452	translational frameshifting	2	2	1	13.33	0.5
biological_process	GO:0045901	positive regulation of translational elongation	2	2	1	13.33	0.5
biological_process	GO:0070131	positive regulation of mitochondrial translation	2	2	1	13.33	0.5
biological_process	GO:0045897	positive regulation of transcription during mitosis	2	2	1	13.33	0.5
biological_process	GO:0010630	regulation of transcription, start site selection	2	2	1	13.33	0.5
biological_process	GO:0034630	RITS complex localization	2	2	1	13.33	0.5
biological_process	GO:0070321	regulation of translation in response to nitrogen starvation	2	2	1	13.33	0.5
molecular_function	GO:0000182	rDNA binding	2	3	1	8.88	0.5
molecular_function	GO:0031490	chromatin DNA binding	2	3	1	8.88	0.5
cellular_component	GO:0055087	Ski complex	2	3	1	8.88	0.5
biological_process	GO:0031848	protection from non-homologous end joining at telomere	2	3	1	8.88	0.5
biological_process	GO:0034307	regulation of ascospore formation	2	3	1	8.88	0.5
biological_process	GO:0031990	mRNA export from nucleus in response to heat stress	2	3	1	8.88	0.5
biological_process	GO:0072592	oxygen metabolic process	2	3	1	8.88	0.5
biological_process	GO:0051569	regulation of histone H3-K4 methylation	2	3	1	8.88	0.5
biological_process	GO:0007531	mating type determination	2	3	1	8.88	0.5
biological_process	GO:0034629	cellular protein complex localization	2	3	1	8.88	0.5
biological_process	GO:0007189	adenylate cyclase-activating G-protein coupled receptor signaling pathway	2	3	1	8.88	0.5
molecular_function	GO:0051020	GTPase binding	2	4	1	6.66	0.5
molecular_function	GO:0017025	TBP-class protein binding	2	4	1	6.66	0.5
molecular_function	GO:0004402	histone acetyltransferase activity	2	4	1	6.66	0.5
molecular_function	GO:0001168	RNA polymerase I upstream control element sequence-specific DNA binding transcription factor activity	2	4	1	6.66	0.5
cellular_component	GO:0034967	Set3 complex	2	4	1	6.66	0.5
cellular_component	GO:0008023	transcription elongation factor complex	2	4	1	6.66	0.5
cellular_component	GO:0000123	histone acetyltransferase complex	2	4	1	6.66	0.5
cellular_component	GO:0000500	RNA polymerase I upstream activating factor complex	2	4	1	6.66	0.5
cellular_component	GO:0000159	protein phosphatase type 2A complex	2	4	1	6.66	0.5
biological_process	GO:0051595	response to methylglyoxal	2	4	1	6.66	0.5
biological_process	GO:0006808	regulation of nitrogen utilization	2	4	1	6.66	0.5
biological_process	GO:0046685	response to arsenic-containing substance	2	4	1	6.66	0.5
biological_process	GO:0031860	telomeric 3' overhang formation	2	4	1	6.66	0.5
biological_process	GO:0006333	chromatin assembly or disassembly	2	4	1	6.66	0.5
biological_process	GO:0051403	stress-activated MAPK cascade	2	4	1	6.66	0.5
molecular_function	GO:0042162	telomeric DNA binding	2	5	1	5.33	0.5
biological_process	GO:0031139	positive regulation of conjugation with cellular fusion	2	5	1	5.33	0.5
biological_process	GO:0051315	attachment of spindle microtubules to kinetochore involved in mitotic sister chromatid segregation	2	5	1	5.33	0.5
biological_process	GO:0009267	cellular response to starvation	2	5	1	5.33	0.5
biological_process	GO:0007186	G-protein coupled receptor signaling pathway	2	5	1	5.33	0.5
biological_process	GO:0006479	protein methylation	2	5	1	5.33	0.5
biological_process	GO:0051445	regulation of meiotic cell cycle	2	5	1	5.33	0.5
biological_process	GO:0006369	termination of RNA polymerase II transcription	2	5	1	5.33	0.5
biological_process	GO:0051754	meiotic sister chromatid cohesion, centromeric	2	5	1	5.33	0.5
biological_process	GO:0051568	histone H3-K4 methylation	2	6	1	4.44	0.5
biological_process	GO:0006883	cellular sodium ion homeostasis	2	6	1	4.44	0.5
biological_process	GO:0043086	negative regulation of catalytic activity	2	7	1	3.81	0.5
biological_process	GO:0016233	telomere capping	2	7	1	3.81	0.5
biological_process	GO:0031030	negative regulation of septation initiation signaling cascade	2	8	1	3.33	0.5
biological_process	GO:0051382	kinetochore assembly	2	8	1	3.33	0.5
biological_process	GO:0032995	regulation of fungal-type cell wall biogenesis	2	9	1	2.96	0.5
biological_process	GO:0032955	regulation of barrier septum assembly	2	9	1	2.96	0.5
biological_process	GO:0006396	RNA processing	2	10	1	2.67	0.49
molecular_function	GO:0005507	copper ion binding	2	11	1	2.42	0.49
biological_process	GO:0030989	dynein-driven meiotic oscillatory nuclear movement	2	11	1	2.42	0.49
biological_process	GO:0061077	chaperone-mediated protein folding	2	11	1	2.42	0.49
molecular_function	GO:0000175	3'-5'-exoribonuclease activity	2	12	1	2.22	0.49
cellular_component	GO:0005654	nucleoplasm	2	12	1	2.22	0.49
biological_process	GO:0016571	histone methylation	2	13	1	2.05	0.49
cellular_component	GO:0031511	Mis6-Sim4 complex	2	14	1	1.9	0.49
biological_process	GO:0006302	double-strand break repair	2	14	1	1.9	0.49
molecular_function	GO:0003746	translation elongation factor activity	2	15	1	1.78	0.49
cellular_component	GO:0000228	nuclear chromosome	2	15	1	1.78	0.49
biological_process	GO:0071276	cellular response to cadmium ion	2	15	1	1.78	0.49
biological_process	GO:0006879	cellular iron ion homeostasis	2	20	1	1.33	0.48
cellular_component	GO:0000151	ubiquitin ligase complex	2	21	1	1.27	0.48
biological_process	GO:0007094	mitotic cell cycle spindle assembly checkpoint	2	27	1	0.99	0.47
molecular_function	GO:0051082	unfolded protein binding	2	28	1	0.95	0.47
biological_process	GO:0030433	ER-associated protein catabolic process	2	28	1	0.95	0.47
biological_process	GO:0006367	transcription initiation from RNA polymerase II promoter	2	33	1	0.81	0.47
biological_process	GO:0006184	GTP catabolic process	2	37	1	0.72	0.46
biological_process	GO:0007163	establishment or maintenance of cell polarity	2	37	1	0.72	0.46
molecular_function	GO:0005509	calcium ion binding	2	38	1	0.7	0.46
molecular_function	GO:0004004	ATP-dependent RNA helicase activity	2	39	1	0.68	0.46
molecular_function	GO:0003924	GTPase activity	2	44	1	0.61	0.46
cellular_component	GO:0005794	Golgi apparatus	3	260	1	0.15	0.46
cellular_component	GO:0000324	fungal-type vacuole	2	47	1	0.57	0.45
molecular_function	GO:0005525	GTP binding	2	78	1	0.34	0.42
cellular_component	GO:0005789	endoplasmic reticulum membrane	2	118	1	0.23	0.39
molecular_function	GO:0004016	adenylate cyclase activity	1	1	1	13.33	0.25
molecular_function	GO:0032931	histone acetyltransferase activity (H3-K56 specific)	1	1	1	13.33	0.25
molecular_function	GO:0034739	histone deacetylase activity (H4-K16 specific)	1	1	1	13.33	0.25
molecular_function	GO:0004691	cAMP-dependent protein kinase activity	1	1	1	13.33	0.25
molecular_function	GO:0046970	NAD-dependent histone deacetylase activity (H4-K16 specific)	1	1	1	13.33	0.25
molecular_function	GO:0032454	histone demethylase activity (H3-K9 specific)	1	1	1	13.33	0.25
molecular_function	GO:0034648	histone demethylase activity (H3-dimethyl-K4 specific)	1	1	1	13.33	0.25
molecular_function	GO:0001012	RNA polymerase II regulatory region DNA binding	1	1	1	13.33	0.25
molecular_function	GO:0008599	protein phosphatase type 1 regulator activity	1	1	1	13.33	0.25
molecular_function	GO:0046969	NAD-dependent histone deacetylase activity (H3-K9 specific)	1	1	1	13.33	0.25
molecular_function	GO:0000983	RNA polymerase II core promoter sequence-specific DNA binding transcription factor activity	1	1	1	13.33	0.25
molecular_function	GO:0000156	two-component response regulator activity	1	1	1	13.33	0.25
molecular_function	GO:0043175	RNA polymerase core enzyme binding	1	1	1	13.33	0.25
molecular_function	GO:0004164	diphthine synthase activity	1	1	1	13.33	0.25
molecular_function	GO:0051920	peroxiredoxin activity	1	1	1	13.33	0.25
molecular_function	GO:0046974	histone methyltransferase activity (H3-K9 specific)	1	1	1	13.33	0.25
molecular_function	GO:0032935	sterol sensor activity	1	1	1	13.33	0.25
molecular_function	GO:0034038	deoxyhypusine synthase activity	1	1	1	13.33	0.25
molecular_function	GO:0003968	RNA-directed RNA polymerase activity	1	1	1	13.33	0.25
molecular_function	GO:0000900	translation repressor activity, nucleic acid binding	1	1	1	13.33	0.25
molecular_function	GO:0070403	NAD+ binding	1	1	1	13.33	0.25
molecular_function	GO:0008428	ribonuclease inhibitor activity	1	1	1	13.33	0.25
molecular_function	GO:0035197	siRNA binding	1	1	1	13.33	0.25
molecular_function	GO:0010484	H3 histone acetyltransferase activity	1	1	1	13.33	0.25
molecular_function	GO:0046975	histone methyltransferase activity (H3-K36 specific)	1	1	1	13.33	0.25
molecular_function	GO:0001018	mitochondrial RNA polymerase regulatory region DNA binding	1	1	1	13.33	0.25
molecular_function	GO:0032810	sterol response element binding	1	1	1	13.33	0.25
molecular_function	GO:0042800	histone methyltransferase activity (H3-K4 specific)	1	1	1	13.33	0.25
molecular_function	GO:0005098	Ran GTPase activator activity	1	1	1	13.33	0.25
molecular_function	GO:0005080	protein kinase C binding	1	1	1	13.33	0.25
molecular_function	GO:0004601	peroxidase activity	1	1	1	13.33	0.25
molecular_function	GO:0004115	3',5'-cyclic-AMP phosphodiesterase activity	1	1	1	13.33	0.25
molecular_function	GO:0008134	transcription factor binding	1	1	1	13.33	0.25
molecular_function	GO:0042799	histone methyltransferase activity (H4-K20 specific)	1	1	1	13.33	0.25
molecular_function	GO:0008112	nicotinamide N-methyltransferase activity	1	1	1	13.33	0.25
molecular_function	GO:0032296	double-stranded RNA-specific ribonuclease activity	1	1	1	13.33	0.25
molecular_function	GO:0031078	histone deacetylase activity (H3-K14 specific)	1	1	1	13.33	0.25
molecular_function	GO:0004061	arylformamidase activity	1	1	1	13.33	0.25
cellular_component	GO:0071004	U2-type prespliceosome	1	1	1	13.33	0.25
cellular_component	GO:0005952	cAMP-dependent protein kinase complex	1	1	1	13.33	0.25
cellular_component	GO:0000164	protein phosphatase type 1 complex	1	1	1	13.33	0.25
cellular_component	GO:0043505	centromere-specific nucleosome	1	1	1	13.33	0.25
biological_process	GO:0071931	positive regulation of transcription involved in G1/S phase of mitotic cell cycle	1	1	1	13.33	0.25
biological_process	GO:0051594	detection of glucose	1	1	1	13.33	0.25
biological_process	GO:0043557	regulation of translation in response to osmotic stress	1	1	1	13.33	0.25
biological_process	GO:0001302	replicative cell aging	1	1	1	13.33	0.25
biological_process	GO:0009300	antisense RNA transcription	1	1	1	13.33	0.25
biological_process	GO:0070817	P-TEFb-cap methyltransferase complex localization	1	1	1	13.33	0.25
biological_process	GO:0071572	histone H3-K56 deacetylation	1	1	1	13.33	0.25
biological_process	GO:0008298	intracellular mRNA localization	1	1	1	13.33	0.25
biological_process	GO:0051383	kinetochore organization	1	1	1	13.33	0.25
biological_process	GO:0000080	G1 phase of mitotic cell cycle	1	1	1	13.33	0.25
biological_process	GO:0090239	regulation of histone H4 acetylation	1	1	1	13.33	0.25
biological_process	GO:0034047	regulation of protein phosphatase type 2A activity	1	1	1	13.33	0.25
biological_process	GO:0022408	negative regulation of cell-cell adhesion	1	1	1	13.33	0.25
biological_process	GO:0045947	negative regulation of translational initiation	1	1	1	13.33	0.25
biological_process	GO:0045899	positive regulation of RNA polymerase II transcriptional preinitiation complex assembly	1	1	1	13.33	0.25
biological_process	GO:0000962	positive regulation of mitochondrial RNA catabolic process	1	1	1	13.33	0.25
biological_process	GO:0071263	negative regulation of translational initiation in response to starvation	1	1	1	13.33	0.25
biological_process	GO:0007068	negative regulation of transcription during mitosis	1	1	1	13.33	0.25
biological_process	GO:0006830	high-affinity zinc ion transport	1	1	1	13.33	0.25
biological_process	GO:0007584	response to nutrient	1	1	1	13.33	0.25
biological_process	GO:0060261	positive regulation of transcription initiation from RNA polymerase II promoter	1	1	1	13.33	0.25
biological_process	GO:0016246	RNA interference	1	1	1	13.33	0.25
biological_process	GO:0032206	positive regulation of telomere maintenance	1	1	1	13.33	0.25
biological_process	GO:0016480	negative regulation of transcription from RNA polymerase III promoter	1	1	1	13.33	0.25
biological_process	GO:0007329	positive regulation of transcription from RNA polymerase II promoter by pheromones	1	1	1	13.33	0.25
biological_process	GO:0031627	telomeric loop formation	1	1	1	13.33	0.25
biological_process	GO:0010678	negative regulation of cellular carbohydrate metabolic process by negative regulation of transcription, DNA-dependent	1	1	1	13.33	0.25
biological_process	GO:0032873	negative regulation of stress-activated MAPK cascade	1	1	1	13.33	0.25
biological_process	GO:0045990	carbon catabolite regulation of transcription	1	1	1	13.33	0.25
biological_process	GO:0097043	histone H3-K56 acetylation	1	1	1	13.33	0.25
biological_process	GO:0048024	regulation of mRNA splicing, via spliceosome	1	1	1	13.33	0.25
biological_process	GO:0023052	signaling	1	1	1	13.33	0.25
biological_process	GO:0008156	negative regulation of DNA replication	1	1	1	13.33	0.25
biological_process	GO:0010846	activation of reciprocal meiotic recombination	1	1	1	13.33	0.25
biological_process	GO:0035616	histone H2B conserved C-terminal lysine deubiquitination	1	1	1	13.33	0.25
biological_process	GO:0006171	cAMP biosynthetic process	1	1	1	13.33	0.25
biological_process	GO:0045723	positive regulation of fatty acid biosynthetic process	1	1	1	13.33	0.25
biological_process	GO:0043966	histone H3 acetylation	1	1	1	13.33	0.25
biological_process	GO:0070940	dephosphorylation of RNA polymerase II C-terminal domain	1	1	1	13.33	0.25
biological_process	GO:0032063	negative regulation of translational initiation in response to osmotic stress	1	1	1	13.33	0.25
biological_process	GO:0045739	positive regulation of DNA repair	1	1	1	13.33	0.25
biological_process	GO:0051101	regulation of DNA binding	1	1	1	13.33	0.25
biological_process	GO:0006359	regulation of transcription from RNA polymerase III promoter	1	1	1	13.33	0.25
biological_process	GO:0000432	positive regulation of transcription from RNA polymerase II promoter by glucose	1	1	1	13.33	0.25
biological_process	GO:0043556	regulation of translation in response to oxidative stress	1	1	1	13.33	0.25
biological_process	GO:0031382	mating projection assembly	1	1	1	13.33	0.25
biological_process	GO:0043335	protein unfolding	1	1	1	13.33	0.25
biological_process	GO:0007243	intracellular protein kinase cascade	1	1	1	13.33	0.25
biological_process	GO:0043619	regulation of transcription from RNA polymerase II promoter in response to oxidative stress	1	1	1	13.33	0.25
biological_process	GO:0043488	regulation of mRNA stability	1	1	1	13.33	0.25
biological_process	GO:0035196	production of miRNAs involved in gene silencing by miRNA	1	1	1	13.33	0.25
biological_process	GO:0050983	deoxyhypusine biosynthetic process from spermidine	1	1	1	13.33	0.25
biological_process	GO:0000091	mitotic anaphase A	1	1	1	13.33	0.25
biological_process	GO:0000117	regulation of transcription involved in G2/M-phase of mitotic cell cycle	1	1	1	13.33	0.25
biological_process	GO:2000873	regulation of histone H4 acetylation involved in response to DNA damage stimulus	1	1	1	13.33	0.25
biological_process	GO:0031939	negative regulation of chromatin silencing at telomere	1	1	1	13.33	0.25
biological_process	GO:0090054	regulation of chromatin silencing at silent mating-type cassette	1	1	1	13.33	0.25
biological_process	GO:0006198	cAMP catabolic process	1	1	1	13.33	0.25
biological_process	GO:0071990	maintenance of protein location in spindle pole body	1	1	1	13.33	0.25
biological_process	GO:0051573	negative regulation of histone H3-K9 methylation	1	1	1	13.33	0.25
biological_process	GO:0090065	regulation of production of siRNA involved in RNA interference	1	1	1	13.33	0.25
biological_process	GO:0001672	regulation of chromatin assembly or disassembly	1	1	1	13.33	0.25
biological_process	GO:0046015	regulation of transcription by glucose	1	1	1	13.33	0.25
biological_process	GO:0035390	establishment of chromatin silencing at telomere	1	1	1	13.33	0.25
biological_process	GO:0070455	positive regulation of heme biosynthetic process	1	1	1	13.33	0.25
biological_process	GO:0001315	age-dependent response to reactive oxygen species	1	1	1	13.33	0.25
biological_process	GO:0061013	regulation of mRNA catabolic process	1	1	1	13.33	0.25
biological_process	GO:0010895	negative regulation of ergosterol biosynthetic process	1	1	1	13.33	0.25
biological_process	GO:0016578	histone deubiquitination	1	1	1	13.33	0.25
biological_process	GO:0007194	negative regulation of adenylate cyclase activity	1	1	1	13.33	0.25
biological_process	GO:0070217	transcription factor TFIIIB complex assembly	1	1	1	13.33	0.25
biological_process	GO:0010452	histone H3-K36 methylation	1	1	1	13.33	0.25
biological_process	GO:0034401	regulation of transcription by chromatin organization	1	1	1	13.33	0.25
biological_process	GO:0045912	negative regulation of carbohydrate metabolic process	1	1	1	13.33	0.25
biological_process	GO:0043409	negative regulation of MAPK cascade	1	1	1	13.33	0.25
biological_process	GO:2000283	negative regulation of cellular amino acid biosynthetic process	1	1	1	13.33	0.25
biological_process	GO:2000434	regulation of protein neddylation	1	1	1	13.33	0.25
biological_process	GO:0060277	negative regulation of transcription involved in G1 phase of mitotic cell cycle	1	1	1	13.33	0.25
biological_process	GO:0034396	negative regulation of transcription from RNA polymerase II promoter in response to iron	1	1	1	13.33	0.25
biological_process	GO:0006449	regulation of translational termination	1	1	1	13.33	0.25
biological_process	GO:0009061	anaerobic respiration	1	1	1	13.33	0.25
biological_process	GO:0031536	positive regulation of exit from mitosis	1	1	1	13.33	0.25
biological_process	GO:0070198	protein localization to chromosome, telomeric region	1	1	1	13.33	0.25
biological_process	GO:0060906	negative regulation of chromatin silencing by small RNA	1	1	1	13.33	0.25
biological_process	GO:0032057	negative regulation of translational initiation in response to stress	1	1	1	13.33	0.25
biological_process	GO:0034260	negative regulation of GTPase activity	1	1	1	13.33	0.25
biological_process	GO:0010468	regulation of gene expression	1	1	1	13.33	0.25
biological_process	GO:0050801	ion homeostasis	1	1	1	13.33	0.25
biological_process	GO:0043462	regulation of ATPase activity	1	1	1	13.33	0.25
biological_process	GO:0006356	regulation of transcription from RNA polymerase I promoter	1	1	1	13.33	0.25
biological_process	GO:0006469	negative regulation of protein kinase activity	1	1	1	13.33	0.25
biological_process	GO:0043156	chromatin remodeling in response to cation stress	1	1	1	13.33	0.25
biological_process	GO:0010812	negative regulation of cell-substrate adhesion	1	1	1	13.33	0.25
biological_process	GO:0032201	telomere maintenance via semi-conservative replication	1	1	1	13.33	0.25
biological_process	GO:0006769	nicotinamide metabolic process	1	1	1	13.33	0.25
biological_process	GO:0031454	regulation of extent of heterochromatin assembly	1	1	1	13.33	0.25
biological_process	GO:0034756	regulation of iron ion transport	1	1	1	13.33	0.25
biological_process	GO:0071930	negative regulation of transcription involved in G1/S phase of mitotic cell cycle	1	1	1	13.33	0.25
biological_process	GO:0031930	mitochondria-nucleus signaling pathway	1	1	1	13.33	0.25
biological_process	GO:0007532	regulation of mating-type specific transcription, DNA-dependent	1	1	1	13.33	0.25
biological_process	GO:0010619	adenylate cyclase-activating glucose-activated G-protein coupled receptor signaling pathway	1	1	1	13.33	0.25
biological_process	GO:0071441	negative regulation of histone H3-K14 acetylation	1	1	1	13.33	0.25
biological_process	GO:0022409	positive regulation of cell-cell adhesion	1	1	1	13.33	0.25
biological_process	GO:0010892	positive regulation of mitochondrial translation in response to stress	1	1	1	13.33	0.25
biological_process	GO:0016458	gene silencing	1	1	1	13.33	0.25
biological_process	GO:0045943	positive regulation of transcription from RNA polymerase I promoter	1	1	1	13.33	0.25
molecular_function	GO:0019901	protein kinase binding	1	2	1	6.66	0.25
molecular_function	GO:0008276	protein methyltransferase activity	1	2	1	6.66	0.25
molecular_function	GO:0004386	helicase activity	1	2	1	6.66	0.25
molecular_function	GO:0004535	poly(A)-specific ribonuclease activity	1	2	1	6.66	0.25
molecular_function	GO:0008026	ATP-dependent helicase activity	1	2	1	6.66	0.25
molecular_function	GO:0031683	G-protein beta/gamma-subunit complex binding	1	2	1	6.66	0.25
molecular_function	GO:0004871	signal transducer activity	1	2	1	6.66	0.25
molecular_function	GO:0016929	SUMO-specific protease activity	1	2	1	6.66	0.25
molecular_function	GO:0003724	RNA helicase activity	1	2	1	6.66	0.25
molecular_function	GO:0008173	RNA methyltransferase activity	1	2	1	6.66	0.25
molecular_function	GO:0001664	G-protein coupled receptor binding	1	2	1	6.66	0.25
molecular_function	GO:0004930	G-protein coupled receptor activity	1	2	1	6.66	0.25
cellular_component	GO:0005850	eukaryotic translation initiation factor 2 complex	1	2	1	6.66	0.25
cellular_component	GO:0070693	P-TEFb-cap methyltransferase complex	1	2	1	6.66	0.25
cellular_component	GO:0043189	H4/H2A histone acetyltransferase complex	1	2	1	6.66	0.25
cellular_component	GO:0005678	chromatin assembly complex	1	2	1	6.66	0.25
cellular_component	GO:0000784	nuclear chromosome, telomeric region	1	2	1	6.66	0.25
cellular_component	GO:0000118	histone deacetylase complex	1	2	1	6.66	0.25
cellular_component	GO:0005740	mitochondrial envelope	1	2	1	6.66	0.25
cellular_component	GO:0035101	FACT complex	1	2	1	6.66	0.25
cellular_component	GO:0035657	eRF1 methyltransferase complex	1	2	1	6.66	0.25
cellular_component	GO:0002144	cytosolic tRNA wobble base thiouridylase complex	1	2	1	6.66	0.25
biological_process	GO:0032436	positive regulation of proteasomal ubiquitin-dependent protein catabolic process	1	2	1	6.66	0.25
biological_process	GO:0030847	termination of RNA polymerase II transcription, exosome-dependent	1	2	1	6.66	0.25
biological_process	GO:0045931	positive regulation of mitotic cell cycle	1	2	1	6.66	0.25
biological_process	GO:0006337	nucleosome disassembly	1	2	1	6.66	0.25
biological_process	GO:0030952	establishment or maintenance of cytoskeleton polarity	1	2	1	6.66	0.25
biological_process	GO:0006390	transcription from mitochondrial promoter	1	2	1	6.66	0.25
biological_process	GO:0043631	RNA polyadenylation	1	2	1	6.66	0.25
biological_process	GO:0045128	negative regulation of reciprocal meiotic recombination	1	2	1	6.66	0.25
biological_process	GO:0001510	RNA methylation	1	2	1	6.66	0.25
biological_process	GO:0010515	negative regulation of induction of conjugation with cellular fusion	1	2	1	6.66	0.25
biological_process	GO:0071459	protein localization to chromosome, centromeric region	1	2	1	6.66	0.25
biological_process	GO:0043066	negative regulation of apoptotic process	1	2	1	6.66	0.25
biological_process	GO:0071238	cellular response to brefeldin A	1	2	1	6.66	0.25
biological_process	GO:0008612	peptidyl-lysine modification to hypusine	1	2	1	6.66	0.25
biological_process	GO:0048239	negative regulation of DNA recombination at telomere	1	2	1	6.66	0.25
biological_process	GO:0031508	centromeric heterochromatin assembly	1	2	1	6.66	0.25
biological_process	GO:0051444	negative regulation of ubiquitin-protein ligase activity	1	2	1	6.66	0.25
biological_process	GO:0030644	cellular chloride ion homeostasis	1	2	1	6.66	0.25
biological_process	GO:0006110	regulation of glycolysis	1	2	1	6.66	0.25
biological_process	GO:0006352	DNA-dependent transcription, initiation	1	2	1	6.66	0.25
biological_process	GO:0032853	positive regulation of Ran GTPase activity	1	2	1	6.66	0.25
molecular_function	GO:0003691	double-stranded telomeric DNA binding	1	3	1	4.44	0.25
molecular_function	GO:0004708	MAP kinase kinase activity	1	3	1	4.44	0.25
molecular_function	GO:0003730	mRNA 3'-UTR binding	1	3	1	4.44	0.25
molecular_function	GO:0004864	protein phosphatase inhibitor activity	1	3	1	4.44	0.25
molecular_function	GO:0042623	ATPase activity, coupled	1	3	1	4.44	0.25
molecular_function	GO:0008379	thioredoxin peroxidase activity	1	3	1	4.44	0.25
molecular_function	GO:0030295	protein kinase activator activity	1	3	1	4.44	0.25
molecular_function	GO:0004707	MAP kinase activity	1	3	1	4.44	0.25
cellular_component	GO:0000126	transcription factor TFIIIB complex	1	3	1	4.44	0.25
cellular_component	GO:0005637	nuclear inner membrane	1	3	1	4.44	0.25
cellular_component	GO:0030529	ribonucleoprotein complex	1	3	1	4.44	0.25
cellular_component	GO:0000783	nuclear telomere cap complex	1	3	1	4.44	0.25
cellular_component	GO:0030874	nucleolar chromatin	1	3	1	4.44	0.25
cellular_component	GO:0005956	protein kinase CK2 complex	1	3	1	4.44	0.25
cellular_component	GO:0070188	Stn1-Ten1 complex	1	3	1	4.44	0.25
cellular_component	GO:0034064	Tor2-Mei2-Ste11 complex	1	3	1	4.44	0.25
biological_process	GO:0016568	chromatin modification	1	3	1	4.44	0.25
biological_process	GO:0042149	cellular response to glucose starvation	1	3	1	4.44	0.25
biological_process	GO:0034224	cellular response to zinc ion starvation	1	3	1	4.44	0.25
biological_process	GO:0045910	negative regulation of DNA recombination	1	3	1	4.44	0.25
biological_process	GO:0072356	chromosome passenger complex localization to kinetochore	1	3	1	4.44	0.25
biological_process	GO:0034770	histone H4-K20 methylation	1	3	1	4.44	0.25
biological_process	GO:0019432	triglyceride biosynthetic process	1	3	1	4.44	0.25
biological_process	GO:0031566	actomyosin contractile ring maintenance	1	3	1	4.44	0.25
biological_process	GO:0045836	positive regulation of meiosis	1	3	1	4.44	0.25
biological_process	GO:0009992	cellular water homeostasis	1	3	1	4.44	0.25
biological_process	GO:0007093	mitotic cell cycle checkpoint	1	3	1	4.44	0.25
biological_process	GO:0032876	negative regulation of DNA endoreduplication	1	3	1	4.44	0.25
biological_process	GO:0007135	meiosis II	1	3	1	4.44	0.25
biological_process	GO:0010963	regulation of L-arginine import	1	3	1	4.44	0.25
biological_process	GO:2000769	regulation of establishment or maintenance of cell polarity regulating cell shape	1	3	1	4.44	0.25
biological_process	GO:0009303	rRNA transcription	1	3	1	4.44	0.25
molecular_function	GO:0008601	protein phosphatase type 2A regulator activity	1	4	1	3.33	0.25
molecular_function	GO:0000150	recombinase activity	1	4	1	3.33	0.25
molecular_function	GO:0019888	protein phosphatase regulator activity	1	4	1	3.33	0.25
cellular_component	GO:0000307	cyclin-dependent protein kinase holoenzyme complex	1	4	1	3.33	0.25
cellular_component	GO:0000347	THO complex	1	4	1	3.33	0.25
cellular_component	GO:0035649	Nrd1 complex	1	4	1	3.33	0.25
cellular_component	GO:0070187	telosome	1	4	1	3.33	0.25
biological_process	GO:0006111	regulation of gluconeogenesis	1	4	1	3.33	0.25
biological_process	GO:0042790	transcription of nuclear large rRNA transcript from RNA polymerase I promoter	1	4	1	3.33	0.25
biological_process	GO:0042744	hydrogen peroxide catabolic process	1	4	1	3.33	0.25
biological_process	GO:0006370	7-methylguanosine mRNA capping	1	4	1	3.33	0.25
biological_process	GO:0045930	negative regulation of mitotic cell cycle	1	4	1	3.33	0.25
biological_process	GO:0042026	protein refolding	1	4	1	3.33	0.25
biological_process	GO:0031123	RNA 3'-end processing	1	4	1	3.33	0.25
biological_process	GO:0002143	tRNA wobble position uridine thiolation	1	4	1	3.33	0.25
biological_process	GO:0016926	protein desumoylation	1	4	1	3.33	0.25
biological_process	GO:0055069	zinc ion homeostasis	1	4	1	3.33	0.25
biological_process	GO:0032447	protein urmylation	1	4	1	3.33	0.25
biological_process	GO:0000266	mitochondrial fission	1	4	1	3.33	0.25
molecular_function	GO:0016279	protein-lysine N-methyltransferase activity	1	5	1	2.67	0.25
molecular_function	GO:0031386	protein tag	1	5	1	2.67	0.25
molecular_function	GO:0035064	methylated histone residue binding	1	5	1	2.67	0.25
molecular_function	GO:0004221	ubiquitin thiolesterase activity	1	5	1	2.67	0.25
molecular_function	GO:0018024	histone-lysine N-methyltransferase activity	1	5	1	2.67	0.25
molecular_function	GO:0046872	metal ion binding	1	5	1	2.67	0.25
biological_process	GO:2000045	regulation of G1/S transition of mitotic cell cycle	1	5	1	2.67	0.25
biological_process	GO:0043623	cellular protein complex assembly	1	5	1	2.67	0.25
biological_process	GO:0051983	regulation of chromosome segregation	1	5	1	2.67	0.25
biological_process	GO:0000022	mitotic spindle elongation	1	5	1	2.67	0.25
biological_process	GO:0001300	chronological cell aging	1	5	1	2.67	0.25
biological_process	GO:0051072	4,6-pyruvylated galactose residue biosynthetic process	1	5	1	2.67	0.25
biological_process	GO:0006282	regulation of DNA repair	1	5	1	2.67	0.25
biological_process	GO:0071277	cellular response to calcium ion	1	5	1	2.67	0.25
molecular_function	GO:0004725	protein tyrosine phosphatase activity	1	6	1	2.22	0.25
molecular_function	GO:0004652	polynucleotide adenylyltransferase activity	1	6	1	2.22	0.25
cellular_component	GO:0005840	ribosome	1	6	1	2.22	0.25
cellular_component	GO:0034455	t-UTP complex	1	6	1	2.22	0.25
cellular_component	GO:0016591	DNA-directed RNA polymerase II, holoenzyme	1	6	1	2.22	0.25
cellular_component	GO:0030998	linear element	1	6	1	2.22	0.25
biological_process	GO:0031322	ascospore-type prospore-specific spindle pole body remodeling	1	6	1	2.22	0.25
biological_process	GO:0000290	deadenylation-dependent decapping of nuclear-transcribed mRNA	1	6	1	2.22	0.25
biological_process	GO:0006325	chromatin organization	1	6	1	2.22	0.25
biological_process	GO:0008361	regulation of cell size	1	6	1	2.22	0.25
biological_process	GO:0032956	regulation of actin cytoskeleton organization	1	6	1	2.22	0.25
biological_process	GO:0019722	calcium-mediated signaling	1	6	1	2.22	0.25
biological_process	GO:0030007	cellular potassium ion homeostasis	1	6	1	2.22	0.25
biological_process	GO:0045859	regulation of protein kinase activity	1	6	1	2.22	0.25
biological_process	GO:0006997	nucleus organization	1	6	1	2.22	0.25
biological_process	GO:0030003	cellular cation homeostasis	1	6	1	2.22	0.25
molecular_function	GO:0004540	ribonuclease activity	1	7	1	1.9	0.25
molecular_function	GO:0005385	zinc ion transmembrane transporter activity	1	7	1	1.9	0.25
molecular_function	GO:0000995	core RNA polymerase III binding transcription factor activity	1	7	1	1.9	0.25
molecular_function	GO:0019887	protein kinase regulator activity	1	7	1	1.9	0.25
cellular_component	GO:0070209	ASTRA complex	1	7	1	1.9	0.25
biological_process	GO:0006283	transcription-coupled nucleotide-excision repair	1	7	1	1.9	0.25
biological_process	GO:0007062	sister chromatid cohesion	1	7	1	1.9	0.25
biological_process	GO:0033047	regulation of mitotic sister chromatid segregation	1	7	1	1.9	0.25
biological_process	GO:0000288	nuclear-transcribed mRNA catabolic process, deadenylation-dependent decay	1	7	1	1.9	0.25
molecular_function	GO:0003690	double-stranded DNA binding	1	8	1	1.67	0.25
molecular_function	GO:0004722	protein serine/threonine phosphatase activity	1	8	1	1.67	0.25
cellular_component	GO:0048188	Set1C/COMPASS complex	1	8	1	1.67	0.25
cellular_component	GO:0016282	eukaryotic 43S preinitiation complex	1	8	1	1.67	0.25
cellular_component	GO:0034399	nuclear periphery	1	8	1	1.67	0.25
biological_process	GO:0007533	mating type switching	1	8	1	1.67	0.25
biological_process	GO:0071313	cellular response to caffeine	1	8	1	1.67	0.25
biological_process	GO:0035556	intracellular signal transduction	1	8	1	1.67	0.25
biological_process	GO:0045454	cell redox homeostasis	1	8	1	1.67	0.25
biological_process	GO:0007076	mitotic chromosome condensation	1	9	1	1.48	0.25
biological_process	GO:0007064	mitotic sister chromatid cohesion	1	9	1	1.48	0.25
biological_process	GO:0031144	proteasome localization	1	9	1	1.48	0.25
biological_process	GO:0006415	translational termination	1	9	1	1.48	0.25
molecular_function	GO:0031593	polyubiquitin binding	1	10	1	1.33	0.25
cellular_component	GO:0071541	eukaryotic translation initiation factor 3 complex, eIF3m	1	10	1	1.33	0.25
cellular_component	GO:0005665	DNA-directed RNA polymerase II, core complex	1	10	1	1.33	0.25
cellular_component	GO:0051233	spindle midzone	1	10	1	1.33	0.25
cellular_component	GO:0008180	signalosome	1	10	1	1.33	0.25
cellular_component	GO:0071540	eukaryotic translation initiation factor 3 complex, eIF3e	1	10	1	1.33	0.25
biological_process	GO:0016925	protein sumoylation	1	10	1	1.33	0.25
biological_process	GO:0006351	transcription, DNA-dependent	1	10	1	1.33	0.25
biological_process	GO:0034644	cellular response to UV	1	10	1	1.33	0.25
biological_process	GO:0007095	mitotic cell cycle G2/M transition DNA damage checkpoint	1	10	1	1.33	0.25
biological_process	GO:0006303	double-strand break repair via nonhomologous end joining	1	10	1	1.33	0.25
molecular_function	GO:0004222	metalloendopeptidase activity	1	11	1	1.21	0.25
cellular_component	GO:0005675	holo TFIIH complex	1	11	1	1.21	0.25
cellular_component	GO:0030173	integral to Golgi membrane	1	11	1	1.21	0.25
biological_process	GO:0000184	nuclear-transcribed mRNA catabolic process, nonsense-mediated decay	1	11	1	1.21	0.25
biological_process	GO:0006310	DNA recombination	1	11	1	1.21	0.25
biological_process	GO:0006384	transcription initiation from RNA polymerase III promoter	1	11	1	1.21	0.25
biological_process	GO:0010570	regulation of filamentous growth	1	12	1	1.11	0.25
molecular_function	GO:0004721	phosphoprotein phosphatase activity	1	13	1	1.03	0.24
cellular_component	GO:0042175	nuclear outer membrane-endoplasmic reticulum membrane network	1	13	1	1.03	0.24
biological_process	GO:0019430	removal of superoxide radicals	1	13	1	1.03	0.24
biological_process	GO:0006874	cellular calcium ion homeostasis	1	13	1	1.03	0.24
biological_process	GO:0034501	protein localization to kinetochore	1	13	1	1.03	0.24
biological_process	GO:0006301	postreplication repair	1	13	1	1.03	0.24
biological_process	GO:0070481	nuclear-transcribed mRNA catabolic process, non-stop decay	1	13	1	1.03	0.24
cellular_component	GO:0030427	site of polarized growth	1	14	1	0.95	0.24
biological_process	GO:0007090	regulation of S phase of mitotic cell cycle	1	14	1	0.95	0.24
biological_process	GO:0000467	exonucleolytic trimming to generate mature 3'-end of 5.8S rRNA from tricistronic rRNA transcript (SSU-rRNA, 5.8S rRNA, LSU-rRNA)	1	15	1	0.89	0.24
cellular_component	GO:0005669	transcription factor TFIID complex	1	16	1	0.83	0.24
biological_process	GO:0042787	protein ubiquitination involved in ubiquitin-dependent protein catabolic process	1	16	1	0.83	0.24
molecular_function	GO:0005096	GTPase activator activity	1	17	1	0.78	0.24
biological_process	GO:0042273	ribosomal large subunit biogenesis	1	17	1	0.78	0.24
biological_process	GO:0031929	TOR signaling cascade	1	17	1	0.78	0.24
biological_process	GO:0071937	barrier septum assembly involved in cell cycle cytokinesis	1	17	1	0.78	0.24
biological_process	GO:0007127	meiosis I	1	17	1	0.78	0.24
cellular_component	GO:0005938	cell cortex	1	18	1	0.74	0.24
biological_process	GO:0006378	mRNA polyadenylation	1	18	1	0.74	0.24
biological_process	GO:0090307	spindle assembly involved in mitosis	1	19	1	0.7	0.24
biological_process	GO:0030150	protein import into mitochondrial matrix	1	19	1	0.7	0.24
biological_process	GO:0006508	proteolysis	1	20	1	0.67	0.24
biological_process	GO:0016579	protein deubiquitination	1	23	1	0.58	0.24
cellular_component	GO:0031097	medial cortex	1	24	1	0.56	0.24
cellular_component	GO:0005741	mitochondrial outer membrane	1	25	1	0.53	0.24
biological_process	GO:0000920	cytokinetic cell separation	1	25	1	0.53	0.24
molecular_function	GO:0030544	Hsp70 protein binding	1	26	1	0.51	0.24
molecular_function	GO:0030515	snoRNA binding	1	26	1	0.51	0.24
molecular_function	GO:0004843	ubiquitin-specific protease activity	1	27	1	0.49	0.24
cellular_component	GO:0051285	cell cortex of cell tip	1	29	1	0.46	0.24
biological_process	GO:0070317	negative regulation of G0 to G1 transition	1	29	1	0.46	0.24
cellular_component	GO:0032040	small-subunit processome	1	32	1	0.42	0.23
biological_process	GO:0006511	ubiquitin-dependent protein catabolic process	1	33	1	0.4	0.23
molecular_function	GO:0003899	DNA-directed RNA polymerase activity	1	34	1	0.39	0.23
biological_process	GO:0006913	nucleocytoplasmic transport	1	34	1	0.39	0.23
biological_process	GO:0030490	maturation of SSU-rRNA	1	34	1	0.39	0.23
biological_process	GO:0006270	DNA replication initiation	1	34	1	0.39	0.23
biological_process	GO:0031505	fungal-type cell wall organization	1	35	1	0.38	0.23
biological_process	GO:0009272	fungal-type cell wall biogenesis	1	38	1	0.35	0.23
cellular_component	GO:0031965	nuclear membrane	1	47	1	0.28	0.23
cellular_component	GO:0016021	integral to membrane	1	52	1	0.26	0.22
biological_process	GO:0043161	proteasomal ubiquitin-dependent protein catabolic process	1	56	1	0.24	0.22
cellular_component	GO:0005681	spliceosomal complex	1	76	1	0.18	0.21
cellular_component	GO:0000329	fungal-type vacuole membrane	1	84	1	0.16	0.21

## Sheet: SGD
Namespace	GO_ID	GO_Name	Together	TermCount	SubjectCount	Score(PR)	Score(S%)
biological_process	GO:0045944	positive regulation of transcription from RNA polymerase II promoter	153	153	0	10.08	24.17
cellular_component	GO:0005634	nucleus	344	1218	0	2.85	22.83
molecular_function	GO:0043565	sequence-specific DNA binding	108	148	0	7.36	16.05
biological_process	GO:0000122	negative regulation of transcription from RNA polymerase II promoter	80	80	0	10.08	12.64
biological_process	GO:0006357	regulation of transcription from RNA polymerase II promoter	68	68	0	10.08	10.74
molecular_function	GO:0000978	RNA polymerase II core promoter proximal region sequence-specific DNA binding	54	54	0	10.08	8.53
biological_process	GO:0006348	chromatin silencing at telomere	53	53	0	10.08	8.37
cellular_component	GO:0005737	cytoplasm	147	1376	0	1.08	7.89
molecular_function	GO:0001077	RNA polymerase II core promoter proximal region sequence-specific DNA binding transcription factor activity involved in positive regulation of transcription	49	49	0	10.08	7.74
biological_process	GO:0030466	chromatin silencing at silent mating-type cassette	39	39	0	10.08	6.16
biological_process	GO:0006368	transcription elongation from RNA polymerase II promoter	35	51	0	6.92	5.39
cellular_component	GO:0000790	nuclear chromatin	35	57	0	6.19	5.34
biological_process	GO:0006355	regulation of transcription, DNA-dependent	31	31	0	10.08	4.9
molecular_function	GO:0003677	DNA binding	32	59	0	5.47	4.85
molecular_function	GO:0003682	chromatin binding	28	57	0	4.95	4.23
cellular_component	GO:0005739	mitochondrion	68	1052	0	0.65	4.21
biological_process	GO:0006468	protein phosphorylation	30	121	0	2.5	4.14
biological_process	GO:0006338	chromatin remodeling	27	49	0	5.56	4.12
biological_process	GO:0032968	positive regulation of transcription elongation from RNA polymerase II promoter	25	25	0	10.08	3.95
molecular_function	GO:0003700	sequence-specific DNA binding transcription factor activity	24	35	0	6.91	3.73
biological_process	GO:0000183	chromatin silencing at rDNA	23	23	0	10.08	3.63
cellular_component	GO:0005730	nucleolus	28	287	0	0.98	3.14
molecular_function	GO:0000981	sequence-specific DNA binding RNA polymerase II transcription factor activity	19	20	0	9.58	3
molecular_function	GO:0016887	ATPase activity	20	86	0	2.34	2.86
biological_process	GO:0034401	regulation of transcription by chromatin organization	18	18	0	10.08	2.84
cellular_component	GO:0070210	Rpd3L-Expanded complex	18	19	0	9.55	2.84
cellular_component	GO:0070847	core mediator complex	18	20	0	9.07	2.83
biological_process	GO:0016575	histone deacetylation	17	19	0	9.02	2.68
biological_process	GO:0016573	histone acetylation	17	40	0	4.28	2.59
biological_process	GO:0006366	transcription from RNA polymerase II promoter	17	52	0	3.3	2.54
molecular_function	GO:0001078	RNA polymerase II core promoter proximal region sequence-specific DNA binding transcription factor activity involved in negative regulation of transcription	16	16	0	10.08	2.53
cellular_component	GO:0033698	Rpd3L complex	16	16	0	10.08	2.53
molecular_function	GO:0003714	transcription corepressor activity	16	17	0	9.49	2.52
molecular_function	GO:0001102	RNA polymerase II activating transcription factor binding	16	20	0	8.07	2.51
molecular_function	GO:0004672	protein kinase activity	18	102	0	1.78	2.51
biological_process	GO:0006281	DNA repair	17	64	0	2.68	2.5
molecular_function	GO:0004402	histone acetyltransferase activity	16	26	0	6.2	2.49
molecular_function	GO:0003688	DNA replication origin binding	16	30	0	5.38	2.47
biological_process	GO:0000723	telomere maintenance	16	33	0	4.89	2.46
molecular_function	GO:0003690	double-stranded DNA binding	16	35	0	4.61	2.45
molecular_function	GO:0003697	single-stranded DNA binding	16	41	0	3.93	2.43
biological_process	GO:0031939	negative regulation of chromatin silencing at telomere	15	15	0	10.08	2.37
molecular_function	GO:0042393	histone binding	15	23	0	6.58	2.34
molecular_function	GO:0001076	RNA polymerase II transcription factor binding transcription factor activity	14	14	0	10.08	2.21
molecular_function	GO:0001135	RNA polymerase II transcription factor recruiting transcription factor activity	14	14	0	10.08	2.21
biological_process	GO:0070816	phosphorylation of RNA polymerase II C-terminal domain	14	14	0	10.08	2.21
molecular_function	GO:0003713	transcription coactivator activity	14	17	0	8.3	2.2
molecular_function	GO:0003729	mRNA binding	15	63	0	2.4	2.2
biological_process	GO:0043044	ATP-dependent chromatin remodeling	14	20	0	7.06	2.19
biological_process	GO:0006270	DNA replication initiation	14	33	0	4.28	2.15
molecular_function	GO:0001103	RNA polymerase II repressing transcription factor binding	13	13	0	10.08	2.05
biological_process	GO:0045893	positive regulation of transcription, DNA-dependent	13	13	0	10.08	2.05
cellular_component	GO:0005844	polysome	13	29	0	4.52	2
cellular_component	GO:0000932	cytoplasmic mRNA processing body	13	29	0	4.52	2
cellular_component	GO:0005643	nuclear pore	13	52	0	2.52	1.93
molecular_function	GO:0003723	RNA binding	16	221	0	0.73	1.91
molecular_function	GO:0045182	translation regulator activity	12	12	0	10.08	1.9
biological_process	GO:0061408	positive regulation of transcription from RNA polymerase II promoter in response to heat stress	12	12	0	10.08	1.9
biological_process	GO:0017148	negative regulation of translation	12	12	0	10.08	1.9
biological_process	GO:0070131	positive regulation of mitochondrial translation	12	12	0	10.08	1.9
biological_process	GO:0006446	regulation of translational initiation	12	12	0	10.08	1.9
biological_process	GO:0006450	regulation of translational fidelity	12	12	0	10.08	1.9
biological_process	GO:0045943	positive regulation of transcription from RNA polymerase I promoter	12	12	0	10.08	1.9
biological_process	GO:0006289	nucleotide-excision repair	12	25	0	4.84	1.86
biological_process	GO:0016973	poly(A)+ mRNA export from nucleus	12	25	0	4.84	1.86
molecular_function	GO:0003743	translation initiation factor activity	12	29	0	4.17	1.85
biological_process	GO:0001302	replicative cell aging	12	38	0	3.18	1.82
biological_process	GO:0030437	ascospore formation	12	53	0	2.28	1.78
biological_process	GO:0007124	pseudohyphal growth	12	55	0	2.2	1.78
molecular_function	GO:0004407	histone deacetylase activity	11	11	0	10.08	1.74
biological_process	GO:0045899	positive regulation of RNA polymerase II transcriptional preinitiation complex assembly	11	11	0	10.08	1.74
biological_process	GO:0061186	negative regulation of chromatin silencing at silent mating-type cassette	11	11	0	10.08	1.74
biological_process	GO:0031938	regulation of chromatin silencing at telomere	11	11	0	10.08	1.74
cellular_component	GO:0005656	pre-replicative complex	11	15	0	7.39	1.73
biological_process	GO:0006267	pre-replicative complex assembly	11	16	0	6.93	1.72
molecular_function	GO:0031491	nucleosome binding	11	18	0	6.16	1.72
cellular_component	GO:0031261	DNA replication preinitiation complex	11	22	0	5.04	1.71
biological_process	GO:0031124	mRNA 3'-end processing	11	23	0	4.82	1.71
cellular_component	GO:0031298	replication fork protection complex	11	25	0	4.44	1.7
biological_process	GO:0006303	double-strand break repair via nonhomologous end joining	11	25	0	4.44	1.7
biological_process	GO:0051123	RNA polymerase II transcriptional preinitiation complex assembly	11	31	0	3.58	1.68
biological_process	GO:0006406	mRNA export from nucleus	11	35	0	3.17	1.67
cellular_component	GO:0005743	mitochondrial inner membrane	12	98	0	1.23	1.67
cellular_component	GO:0005829	cytosol	18	486	0	0.37	1.63
molecular_function	GO:0001133	sequence-specific transcription regulatory region DNA binding RNA polymerase II transcription factor recruiting transcription factor activity	10	10	0	10.08	1.58
molecular_function	GO:0000982	RNA polymerase II core promoter proximal region sequence-specific DNA binding transcription factor activity	10	10	0	10.08	1.58
molecular_function	GO:0000990	core RNA polymerase binding transcription factor activity	10	10	0	10.08	1.58
molecular_function	GO:0000987	core promoter proximal region sequence-specific DNA binding	10	10	0	10.08	1.58
cellular_component	GO:0033553	rDNA heterochromatin	10	10	0	10.08	1.58
biological_process	GO:0016584	nucleosome positioning	10	10	0	10.08	1.58
biological_process	GO:0006417	regulation of translation	10	10	0	10.08	1.58
biological_process	GO:0000433	negative regulation of transcription from RNA polymerase II promoter by glucose	10	10	0	10.08	1.58
biological_process	GO:0006342	chromatin silencing	10	10	0	10.08	1.58
cellular_component	GO:0005675	holo TFIIH complex	10	11	0	9.17	1.58
cellular_component	GO:0016514	SWI/SNF complex	10	12	0	8.4	1.57
biological_process	GO:0030174	regulation of DNA-dependent DNA replication initiation	10	12	0	8.4	1.57
molecular_function	GO:0043022	ribosome binding	10	16	0	6.3	1.56
biological_process	GO:0000082	G1/S transition of mitotic cell cycle	10	31	0	3.25	1.53
biological_process	GO:0006606	protein import into nucleus	10	36	0	2.8	1.52
cellular_component	GO:0016021	integral to membrane	22	832	0	0.27	1.52
biological_process	GO:0006974	response to DNA damage stimulus	10	46	0	2.19	1.49
biological_process	GO:0000462	maturation of SSU-rRNA from tricistronic rRNA transcript (SSU-rRNA, 5.8S rRNA, LSU-rRNA)	10	62	0	1.63	1.46
molecular_function	GO:0001191	RNA polymerase II transcription factor binding transcription factor activity involved in negative regulation of transcription	9	9	0	10.08	1.42
cellular_component	GO:0030015	CCR4-NOT core complex	9	9	0	10.08	1.42
biological_process	GO:0000436	carbon catabolite activation of transcription from RNA polymerase II promoter	9	9	0	10.08	1.42
biological_process	GO:0046020	negative regulation of transcription from RNA polymerase II promoter by pheromones	9	9	0	10.08	1.42
biological_process	GO:0032880	regulation of protein localization	9	13	0	6.98	1.41
molecular_function	GO:0015616	DNA translocase activity	9	16	0	5.67	1.41
biological_process	GO:0000973	posttranscriptional tethering of RNA polymerase II gene DNA at nuclear periphery	9	16	0	5.67	1.41
cellular_component	GO:0000307	cyclin-dependent protein kinase holoenzyme complex	9	17	0	5.34	1.4
biological_process	GO:0006337	nucleosome disassembly	9	19	0	4.78	1.4
biological_process	GO:0006261	DNA-dependent DNA replication	9	19	0	4.78	1.4
cellular_component	GO:0000124	SAGA complex	9	20	0	4.54	1.4
cellular_component	GO:0005654	nucleoplasm	9	29	0	3.13	1.38
cellular_component	GO:0005886	plasma membrane	13	327	0	0.4	1.37
cellular_component	GO:0032040	small-subunit processome	9	49	0	1.85	1.34
molecular_function	GO:0004674	protein serine/threonine kinase activity	9	53	0	1.71	1.33
cellular_component	GO:0022627	cytosolic small ribosomal subunit	9	64	0	1.42	1.31
biological_process	GO:0000114	regulation of transcription involved in G1 phase of mitotic cell cycle	8	8	0	10.08	1.26
biological_process	GO:0097034	mitochondrial respiratory chain complex IV biogenesis	8	8	0	10.08	1.26
biological_process	GO:0061188	negative regulation of chromatin silencing at rDNA	8	8	0	10.08	1.26
biological_process	GO:0000083	regulation of transcription involved in G1/S phase of mitotic cell cycle	8	8	0	10.08	1.26
molecular_function	GO:0008134	transcription factor binding	8	9	0	8.96	1.26
biological_process	GO:0051568	histone H3-K4 methylation	8	11	0	7.33	1.26
cellular_component	GO:0000784	nuclear chromosome, telomeric region	8	12	0	6.72	1.26
molecular_function	GO:0000993	RNA polymerase II core binding	8	13	0	6.2	1.25
cellular_component	GO:0035267	NuA4 histone acetyltransferase complex	8	13	0	6.2	1.25
biological_process	GO:0006325	chromatin organization	8	13	0	6.2	1.25
biological_process	GO:0006333	chromatin assembly or disassembly	8	17	0	4.74	1.25
cellular_component	GO:0016586	RSC complex	8	18	0	4.48	1.24
biological_process	GO:0051726	regulation of cell cycle	8	18	0	4.48	1.24
molecular_function	GO:0008301	DNA binding, bending	8	21	0	3.84	1.24
molecular_function	GO:0016538	cyclin-dependent protein kinase regulator activity	8	22	0	3.67	1.24
biological_process	GO:0000727	double-strand break repair via break-induced replication	8	26	0	3.1	1.23
biological_process	GO:0001403	invasive growth in response to glucose limitation	8	44	0	1.83	1.2
molecular_function	GO:0003735	structural constituent of ribosome	10	224	0	0.45	1.18
cellular_component	GO:0005759	mitochondrial matrix	8	65	0	1.24	1.16
biological_process	GO:0002181	cytoplasmic translation	9	168	0	0.54	1.14
molecular_function	GO:0004842	ubiquitin-protein ligase activity	8	80	0	1.01	1.13
cellular_component	GO:0030686	90S preribosome	8	80	0	1.01	1.13
biological_process	GO:0006364	rRNA processing	8	81	0	1	1.13
molecular_function	GO:0004693	cyclin-dependent protein kinase activity	7	7	0	10.08	1.11
cellular_component	GO:0000439	core TFIIH complex	7	7	0	10.08	1.11
cellular_component	GO:0034455	t-UTP complex	7	7	0	10.08	1.11
biological_process	GO:0043618	regulation of transcription from RNA polymerase II promoter in response to stress	7	7	0	10.08	1.11
biological_process	GO:2001209	positive regulation of transcription elongation from RNA polymerase I promoter	7	7	0	10.08	1.11
biological_process	GO:0050821	protein stabilization	7	7	0	10.08	1.11
biological_process	GO:0090262	regulation of transcription-coupled nucleotide-excision repair	7	7	0	10.08	1.11
biological_process	GO:0071400	cellular response to oleic acid	7	7	0	10.08	1.11
cellular_component	GO:0005840	ribosome	8	93	0	0.87	1.11
cellular_component	GO:0005724	nuclear telomeric heterochromatin	7	8	0	8.82	1.1
biological_process	GO:0034398	telomere tethering at nuclear periphery	7	8	0	8.82	1.1
molecular_function	GO:0000991	core RNA polymerase II binding transcription factor activity	7	9	0	7.84	1.1
cellular_component	GO:0000123	histone acetyltransferase complex	7	9	0	7.84	1.1
biological_process	GO:0031990	mRNA export from nucleus in response to heat stress	7	10	0	7.06	1.1
molecular_function	GO:0035064	methylated histone residue binding	7	11	0	6.42	1.1
biological_process	GO:0042766	nucleosome mobilization	7	11	0	6.42	1.1
biological_process	GO:0006369	termination of RNA polymerase II transcription	7	13	0	5.43	1.1
biological_process	GO:0043486	histone exchange	7	14	0	5.04	1.09
biological_process	GO:0008298	intracellular mRNA localization	7	15	0	4.71	1.09
cellular_component	GO:0022626	cytosolic ribosome	7	18	0	3.92	1.09
cellular_component	GO:0031314	extrinsic to mitochondrial inner membrane	7	21	0	3.36	1.08
cellular_component	GO:0010494	cytoplasmic stress granule	7	21	0	3.36	1.08
biological_process	GO:0016568	chromatin modification	7	21	0	3.36	1.08
biological_process	GO:0006302	double-strand break repair	7	25	0	2.82	1.08
molecular_function	GO:0017056	structural constituent of nuclear pore	7	26	0	2.71	1.07
molecular_function	GO:0005525	GTP binding	7	29	0	2.43	1.07
biological_process	GO:0008361	regulation of cell size	7	30	0	2.35	1.07
biological_process	GO:0007005	mitochondrion organization	7	35	0	2.02	1.06
molecular_function	GO:0005198	structural molecule activity	7	36	0	1.96	1.06
cellular_component	GO:0005935	cellular bud neck	8	127	0	0.64	1.06
biological_process	GO:0016567	protein ubiquitination	7	41	0	1.72	1.05
cellular_component	GO:0005635	nuclear envelope	7	58	0	1.22	1.02
molecular_function	GO:0051082	unfolded protein binding	7	67	0	1.05	1.01
biological_process	GO:0031505	fungal-type cell wall organization	7	91	0	0.78	0.98
cellular_component	GO:0005664	nuclear origin of replication recognition complex	6	6	0	10.08	0.95
biological_process	GO:0007329	positive regulation of transcription from RNA polymerase II promoter by pheromones	6	6	0	10.08	0.95
biological_process	GO:0060963	positive regulation of ribosomal protein gene transcription from RNA polymerase II promoter	6	6	0	10.08	0.95
biological_process	GO:0048255	mRNA stabilization	6	6	0	10.08	0.95
biological_process	GO:0006336	DNA replication-independent nucleosome assembly	6	6	0	10.08	0.95
biological_process	GO:0001080	nitrogen catabolite activation of transcription from RNA polymerase II promoter	6	6	0	10.08	0.95
biological_process	GO:0001308	negative regulation of chromatin silencing involved in replicative cell aging	6	6	0	10.08	0.95
biological_process	GO:0016479	negative regulation of transcription from RNA polymerase I promoter	6	6	0	10.08	0.95
biological_process	GO:0036003	positive regulation of transcription from RNA polymerase II promoter in response to stress	6	6	0	10.08	0.95
biological_process	GO:0007532	regulation of mating-type specific transcription, DNA-dependent	6	6	0	10.08	0.95
biological_process	GO:0045903	positive regulation of translational fidelity	6	6	0	10.08	0.95
molecular_function	GO:0031490	chromatin DNA binding	6	7	0	8.64	0.95
cellular_component	GO:0016593	Cdc73/Paf1 complex	6	7	0	8.64	0.95
cellular_component	GO:0031080	nuclear pore outer ring	6	7	0	8.64	0.95
cellular_component	GO:0000118	histone deacetylase complex	6	7	0	8.64	0.95
cellular_component	GO:0000112	nucleotide-excision repair factor 3 complex	6	7	0	8.64	0.95
biological_process	GO:0000289	nuclear-transcribed mRNA poly(A) tail shortening	6	7	0	8.64	0.95
molecular_function	GO:0042800	histone methyltransferase activity (H3-K4 specific)	6	8	0	7.56	0.94
cellular_component	GO:0048188	Set1C/COMPASS complex	6	8	0	7.56	0.94
cellular_component	GO:0035327	transcriptionally active chromatin	6	8	0	7.56	0.94
biological_process	GO:0031081	nuclear pore distribution	6	9	0	6.72	0.94
biological_process	GO:0006367	transcription initiation from RNA polymerase II promoter	6	11	0	5.5	0.94
cellular_component	GO:0031011	Ino80 complex	6	12	0	5.04	0.94
cellular_component	GO:0000812	Swr1 complex	6	14	0	4.32	0.94
molecular_function	GO:0042162	telomeric DNA binding	6	16	0	3.78	0.93
biological_process	GO:0000724	double-strand break repair via homologous recombination	6	16	0	3.78	0.93
cellular_component	GO:0046695	SLIK (SAGA-like) complex	6	17	0	3.56	0.93
biological_process	GO:0001300	chronological cell aging	6	17	0	3.56	0.93
biological_process	GO:0002098	tRNA wobble uridine modification	6	22	0	2.75	0.92
biological_process	GO:0007059	chromosome segregation	6	44	0	1.37	0.89
molecular_function	GO:0005515	protein binding	6	55	0	1.1	0.88
cellular_component	GO:0005934	cellular bud tip	6	72	0	0.84	0.86
molecular_function	GO:0003705	RNA polymerase II distal enhancer sequence-specific DNA binding transcription factor activity	5	5	0	10.08	0.79
molecular_function	GO:0001128	RNA polymerase II transcription coactivator activity involved in preinitiation complex assembly	5	5	0	10.08	0.79
molecular_function	GO:0001190	RNA polymerase II transcription factor binding transcription factor activity involved in positive regulation of transcription	5	5	0	10.08	0.79
cellular_component	GO:0005851	eukaryotic translation initiation factor 2B complex	5	5	0	10.08	0.79
cellular_component	GO:0000408	EKC/KEOPS complex	5	5	0	10.08	0.79
cellular_component	GO:0032221	Rpd3S complex	5	5	0	10.08	0.79
biological_process	GO:0071931	positive regulation of transcription involved in G1/S phase of mitotic cell cycle	5	5	0	10.08	0.79
biological_process	GO:2001173	regulation of histone H2B conserved C-terminal lysine ubiquitination	5	5	0	10.08	0.79
biological_process	GO:0045947	negative regulation of translational initiation	5	5	0	10.08	0.79
biological_process	GO:0031936	negative regulation of chromatin silencing	5	5	0	10.08	0.79
biological_process	GO:0043433	negative regulation of sequence-specific DNA binding transcription factor activity	5	5	0	10.08	0.79
biological_process	GO:0061412	positive regulation of transcription from RNA polymerase II promoter in response to amino acid starvation	5	5	0	10.08	0.79
biological_process	GO:0043619	regulation of transcription from RNA polymerase II promoter in response to oxidative stress	5	5	0	10.08	0.79
biological_process	GO:0060277	negative regulation of transcription involved in G1 phase of mitotic cell cycle	5	5	0	10.08	0.79
biological_process	GO:0006356	regulation of transcription from RNA polymerase I promoter	5	5	0	10.08	0.79
biological_process	GO:0061395	positive regulation of transcription from RNA polymerase II promoter in response to arsenic-containing substance	5	5	0	10.08	0.79
cellular_component	GO:0033588	Elongator holoenzyme complex	5	6	0	8.4	0.79
cellular_component	GO:0005761	mitochondrial ribosome	5	6	0	8.4	0.79
cellular_component	GO:0016592	mediator complex	5	6	0	8.4	0.79
biological_process	GO:0043457	regulation of cellular respiration	5	6	0	8.4	0.79
biological_process	GO:0042710	biofilm formation	5	6	0	8.4	0.79
cellular_component	GO:0034967	Set3 complex	5	7	0	7.2	0.79
cellular_component	GO:0032045	guanyl-nucleotide exchange factor complex	5	7	0	7.2	0.79
biological_process	GO:0045835	negative regulation of meiosis	5	7	0	7.2	0.79
biological_process	GO:0031573	intra-S DNA damage checkpoint	5	7	0	7.2	0.79
biological_process	GO:0033962	cytoplasmic mRNA processing body assembly	5	8	0	6.3	0.79
biological_process	GO:0005987	sucrose catabolic process	5	8	0	6.3	0.79
cellular_component	GO:0000783	nuclear telomere cap complex	5	10	0	5.04	0.78
biological_process	GO:0070682	proteasome regulatory particle assembly	5	10	0	5.04	0.78
biological_process	GO:0042276	error-prone translesion synthesis	5	10	0	5.04	0.78
molecular_function	GO:0043140	ATP-dependent 3'-5' DNA helicase activity	5	11	0	4.58	0.78
cellular_component	GO:0008540	proteasome regulatory particle, base subcomplex	5	11	0	4.58	0.78
biological_process	GO:0000288	nuclear-transcribed mRNA catabolic process, deadenylation-dependent decay	5	11	0	4.58	0.78
biological_process	GO:0006607	NLS-bearing substrate import into nucleus	5	12	0	4.2	0.78
biological_process	GO:0006351	transcription, DNA-dependent	5	12	0	4.2	0.78
biological_process	GO:0006360	transcription from RNA polymerase I promoter	5	12	0	4.2	0.78
biological_process	GO:0000084	S phase of mitotic cell cycle	5	13	0	3.88	0.78
molecular_function	GO:0005487	nucleocytoplasmic transporter activity	5	14	0	3.6	0.78
biological_process	GO:0044262	cellular carbohydrate metabolic process	5	14	0	3.6	0.78
molecular_function	GO:0005085	guanyl-nucleotide exchange factor activity	5	16	0	3.15	0.78
molecular_function	GO:0030515	snoRNA binding	5	16	0	3.15	0.78
biological_process	GO:0008654	phospholipid biosynthetic process	5	16	0	3.15	0.78
molecular_function	GO:0003684	damaged DNA binding	5	19	0	2.65	0.77
biological_process	GO:0070481	nuclear-transcribed mRNA catabolic process, non-stop decay	5	21	0	2.4	0.77
molecular_function	GO:0005524	ATP binding	5	22	0	2.29	0.77
molecular_function	GO:0008094	DNA-dependent ATPase activity	5	23	0	2.19	0.77
molecular_function	GO:0004722	protein serine/threonine phosphatase activity	5	24	0	2.1	0.77
biological_process	GO:0007094	mitotic cell cycle spindle assembly checkpoint	5	26	0	1.94	0.76
biological_process	GO:0007165	signal transduction	5	30	0	1.68	0.76
molecular_function	GO:0043130	ubiquitin binding	5	39	0	1.29	0.75
molecular_function	GO:0003924	GTPase activity	5	58	0	0.87	0.73
cellular_component	GO:0000131	incipient cellular bud site	5	58	0	0.87	0.73
biological_process	GO:0034599	cellular response to oxidative stress	5	69	0	0.73	0.72
biological_process	GO:0000398	mRNA splicing, via spliceosome	5	82	0	0.61	0.7
cellular_component	GO:0022625	cytosolic large ribosomal subunit	5	93	0	0.54	0.69
cellular_component	GO:0043332	mating projection tip	5	105	0	0.48	0.68
molecular_function	GO:0001105	RNA polymerase II transcription coactivator activity	4	4	0	10.08	0.63
molecular_function	GO:0000182	rDNA binding	4	4	0	10.08	0.63
molecular_function	GO:0000989	transcription factor binding transcription factor activity	4	4	0	10.08	0.63
molecular_function	GO:0017136	NAD-dependent histone deacetylase activity	4	4	0	10.08	0.63
molecular_function	GO:0070491	repressing transcription factor binding	4	4	0	10.08	0.63
molecular_function	GO:0000977	RNA polymerase II regulatory region sequence-specific DNA binding	4	4	0	10.08	0.63
cellular_component	GO:0000417	HIR complex	4	4	0	10.08	0.63
cellular_component	GO:0033309	SBF transcription complex	4	4	0	10.08	0.63
cellular_component	GO:0008623	chromatin accessibility complex	4	4	0	10.08	0.63
cellular_component	GO:0005956	protein kinase CK2 complex	4	4	0	10.08	0.63
cellular_component	GO:0005667	transcription factor complex	4	4	0	10.08	0.63
cellular_component	GO:0005677	chromatin silencing complex	4	4	0	10.08	0.63
cellular_component	GO:0030907	MBF transcription complex	4	4	0	10.08	0.63
cellular_component	GO:0016602	CCAAT-binding factor complex	4	4	0	10.08	0.63
biological_process	GO:0010674	negative regulation of transcription from RNA polymerase II promoter during meiosis	4	4	0	10.08	0.63
biological_process	GO:0070868	heterochromatin organization involved in chromatin silencing	4	4	0	10.08	0.63
biological_process	GO:0070940	dephosphorylation of RNA polymerase II C-terminal domain	4	4	0	10.08	0.63
biological_process	GO:0006359	regulation of transcription from RNA polymerase III promoter	4	4	0	10.08	0.63
biological_process	GO:0010629	negative regulation of gene expression	4	4	0	10.08	0.63
biological_process	GO:0051090	regulation of sequence-specific DNA binding transcription factor activity	4	4	0	10.08	0.63
biological_process	GO:0045727	positive regulation of translation	4	4	0	10.08	0.63
biological_process	GO:1900461	positive regulation of pseudohyphal growth by positive regulation of transcription from RNA polymerase II promoter	4	4	0	10.08	0.63
biological_process	GO:0090282	positive regulation of transcription involved in G2/M-phase of mitotic cell cycle	4	4	0	10.08	0.63
biological_process	GO:0035392	maintenance of chromatin silencing at telomere	4	4	0	10.08	0.63
biological_process	GO:0001015	snoRNA transcription from an RNA polymerase II promoter	4	4	0	10.08	0.63
biological_process	GO:0060195	negative regulation of antisense RNA transcription	4	4	0	10.08	0.63
biological_process	GO:0070525	threonylcarbamoyladenosine metabolic process	4	4	0	10.08	0.63
biological_process	GO:0036095	positive regulation of invasive growth in response to glucose limitation by positive regulation of transcription from RNA polymerase II promoter	4	4	0	10.08	0.63
biological_process	GO:0061404	positive regulation of transcription from RNA polymerase II promoter in response to increased salt	4	4	0	10.08	0.63
biological_process	GO:2000221	negative regulation of pseudohyphal growth	4	4	0	10.08	0.63
biological_process	GO:0000411	positive regulation of transcription by galactose	4	4	0	10.08	0.63
biological_process	GO:0006449	regulation of translational termination	4	4	0	10.08	0.63
biological_process	GO:0031496	positive regulation of mating type switching	4	4	0	10.08	0.63
biological_process	GO:2001165	positive regulation of phosphorylation of RNA polymerase II C-terminal domain serine 2 residues	4	4	0	10.08	0.63
biological_process	GO:0000435	positive regulation of transcription from RNA polymerase II promoter by galactose	4	4	0	10.08	0.63
biological_process	GO:0060211	regulation of nuclear-transcribed mRNA poly(A) tail shortening	4	4	0	10.08	0.63
biological_process	GO:0007070	negative regulation of transcription from RNA polymerase II promoter during mitosis	4	4	0	10.08	0.63
biological_process	GO:0035969	positive regulation of sterol import by positive regulation of transcription from RNA polymerase II promoter	4	4	0	10.08	0.63
biological_process	GO:0097033	mitochondrial respiratory chain complex III biogenesis	4	4	0	10.08	0.63
cellular_component	GO:0008622	epsilon DNA polymerase complex	4	5	0	8.07	0.63
biological_process	GO:0007535	donor selection	4	5	0	8.07	0.63
biological_process	GO:0034503	protein localization to nucleolar rDNA repeats	4	5	0	8.07	0.63
biological_process	GO:0035066	positive regulation of histone acetylation	4	5	0	8.07	0.63
molecular_function	GO:0031369	translation initiation factor binding	4	6	0	6.72	0.63
molecular_function	GO:0070577	histone acetyl-lysine binding	4	6	0	6.72	0.63
cellular_component	GO:0034456	UTP-C complex	4	6	0	6.72	0.63
biological_process	GO:0006334	nucleosome assembly	4	6	0	6.72	0.63
biological_process	GO:0006362	transcription elongation from RNA polymerase I promoter	4	6	0	6.72	0.63
biological_process	GO:0006363	termination of RNA polymerase I transcription	4	6	0	6.72	0.63
biological_process	GO:0031930	mitochondria-nucleus signaling pathway	4	6	0	6.72	0.63
biological_process	GO:0045910	negative regulation of DNA recombination	4	7	0	5.76	0.63
biological_process	GO:0070911	global genome nucleotide-excision repair	4	7	0	5.76	0.63
biological_process	GO:0034063	stress granule assembly	4	8	0	5.04	0.63
biological_process	GO:0006271	DNA strand elongation involved in DNA replication	4	9	0	4.48	0.63
molecular_function	GO:0008599	protein phosphatase type 1 regulator activity	4	10	0	4.03	0.63
cellular_component	GO:0000775	chromosome, centromeric region	4	10	0	4.03	0.63
biological_process	GO:0031126	snoRNA 3'-end processing	4	10	0	4.03	0.63
cellular_component	GO:0000788	nuclear nucleosome	4	12	0	3.36	0.62
cellular_component	GO:0044613	nuclear pore central transport channel	4	12	0	3.36	0.62
biological_process	GO:0000054	ribosomal subunit export from nucleus	4	12	0	3.36	0.62
molecular_function	GO:0000049	tRNA binding	4	13	0	3.1	0.62
biological_process	GO:0006272	leading strand elongation	4	13	0	3.1	0.62
biological_process	GO:0006409	tRNA export from nucleus	4	13	0	3.1	0.62
molecular_function	GO:0005543	phospholipid binding	4	14	0	2.88	0.62
biological_process	GO:0006611	protein export from nucleus	4	14	0	2.88	0.62
biological_process	GO:0006301	postreplication repair	4	14	0	2.88	0.62
biological_process	GO:0043162	ubiquitin-dependent protein catabolic process via the multivesicular body sorting pathway	4	15	0	2.69	0.62
molecular_function	GO:0008047	enzyme activator activity	4	17	0	2.37	0.62
cellular_component	GO:0000228	nuclear chromosome	4	17	0	2.37	0.62
biological_process	GO:0000077	DNA damage checkpoint	4	17	0	2.37	0.62
biological_process	GO:0006407	rRNA export from nucleus	4	19	0	2.12	0.62
molecular_function	GO:0003678	DNA helicase activity	4	20	0	2.02	0.62
biological_process	GO:0000209	protein polyubiquitination	4	22	0	1.83	0.61
biological_process	GO:0007064	mitotic sister chromatid cohesion	4	25	0	1.61	0.61
biological_process	GO:0000750	pheromone-dependent signal transduction involved in conjugation with cellular fusion	4	26	0	1.55	0.61
biological_process	GO:0000086	G2/M transition of mitotic cell cycle	4	27	0	1.49	0.61
biological_process	GO:0030010	establishment of cell polarity	4	32	0	1.26	0.61
biological_process	GO:0006470	protein dephosphorylation	4	35	0	1.15	0.6
biological_process	GO:0006511	ubiquitin-dependent protein catabolic process	4	35	0	1.15	0.6
cellular_component	GO:0005933	cellular bud	4	36	0	1.12	0.6
biological_process	GO:0007126	meiosis	4	37	0	1.09	0.6
biological_process	GO:0007015	actin filament organization	4	38	0	1.06	0.6
biological_process	GO:0006457	protein folding	4	61	0	0.66	0.58
cellular_component	GO:0005816	spindle pole body	4	62	0	0.65	0.58
molecular_function	GO:0003887	DNA-directed DNA polymerase activity	4	63	0	0.64	0.58
molecular_function	GO:0008353	RNA polymerase II carboxy-terminal domain kinase activity	3	3	0	10.08	0.47
molecular_function	GO:0001085	RNA polymerase II transcription factor binding	3	3	0	10.08	0.47
molecular_function	GO:0031492	nucleosomal DNA binding	3	3	0	10.08	0.47
molecular_function	GO:0031370	eukaryotic initiation factor 4G binding	3	3	0	10.08	0.47
cellular_component	GO:0000814	ESCRT II complex	3	3	0	10.08	0.47
cellular_component	GO:0070985	TFIIK complex	3	3	0	10.08	0.47
cellular_component	GO:0033255	SAS acetyltransferase complex	3	3	0	10.08	0.47
cellular_component	GO:0070823	HDA1 complex	3	3	0	10.08	0.47
cellular_component	GO:0032806	carboxy-terminal domain protein kinase complex	3	3	0	10.08	0.47
biological_process	GO:2001040	positive regulation of cellular response to drug	3	3	0	10.08	0.47
biological_process	GO:0044109	cellular alcohol catabolic process	3	3	0	10.08	0.47
biological_process	GO:0061410	positive regulation of transcription from RNA polymerase II promoter in response to ethanol	3	3	0	10.08	0.47
biological_process	GO:0031047	gene silencing by RNA	3	3	0	10.08	0.47
biological_process	GO:0032874	positive regulation of stress-activated MAPK cascade	3	3	0	10.08	0.47
biological_process	GO:0045892	negative regulation of transcription, DNA-dependent	3	3	0	10.08	0.47
biological_process	GO:0035955	negative regulation of dipeptide transport by negative regulation of transcription from RNA polymerase II promoter	3	3	0	10.08	0.47
biological_process	GO:0045128	negative regulation of reciprocal meiotic recombination	3	3	0	10.08	0.47
biological_process	GO:0010978	gene silencing involved in chronological cell aging	3	3	0	10.08	0.47
biological_process	GO:0043488	regulation of mRNA stability	3	3	0	10.08	0.47
biological_process	GO:0035948	positive regulation of gluconeogenesis by positive regulation of transcription from RNA polymerase II promoter	3	3	0	10.08	0.47
biological_process	GO:1900524	positive regulation of flocculation via cell wall protein-carbohydrate interaction by positive regulation of transcription from RNA polymerase II promoter	3	3	0	10.08	0.47
biological_process	GO:0051038	negative regulation of transcription during meiosis	3	3	0	10.08	0.47
biological_process	GO:0061393	positive regulation of transcription from RNA polymerase II promoter in response to osmotic stress	3	3	0	10.08	0.47
biological_process	GO:0032056	positive regulation of translation in response to stress	3	3	0	10.08	0.47
biological_process	GO:0061414	positive regulation of transcription from RNA polymerase II promoter by a nonfermentable carbon source	3	3	0	10.08	0.47
biological_process	GO:2001255	positive regulation of histone H3-K36 trimethylation	3	3	0	10.08	0.47
biological_process	GO:0061422	positive regulation of transcription from RNA polymerase II promoter in response to alkalinity	3	3	0	10.08	0.47
biological_process	GO:0032786	positive regulation of DNA-dependent transcription, elongation	3	3	0	10.08	0.47
biological_process	GO:0045722	positive regulation of gluconeogenesis	3	3	0	10.08	0.47
biological_process	GO:0051569	regulation of histone H3-K4 methylation	3	3	0	10.08	0.47
biological_process	GO:0031647	regulation of protein stability	3	3	0	10.08	0.47
biological_process	GO:0031571	mitotic cell cycle G1/S transition DNA damage checkpoint	3	3	0	10.08	0.47
biological_process	GO:0031564	transcription antitermination	3	3	0	10.08	0.47
biological_process	GO:0034402	recruitment of 3'-end processing factors to RNA polymerase II holoenzyme complex	3	3	0	10.08	0.47
biological_process	GO:0001178	regulation of transcriptional start site selection at RNA polymerase II promoter	3	3	0	10.08	0.47
biological_process	GO:0072363	regulation of glycolysis by positive regulation of transcription from RNA polymerase II promoter	3	3	0	10.08	0.47
biological_process	GO:0000117	regulation of transcription involved in G2/M-phase of mitotic cell cycle	3	3	0	10.08	0.47
biological_process	GO:2000232	regulation of rRNA processing	3	3	0	10.08	0.47
biological_process	GO:0006354	DNA-dependent transcription, elongation	3	3	0	10.08	0.47
biological_process	GO:1900460	negative regulation of invasive growth in response to glucose limitation by negative regulation of transcription from RNA polymerase II promoter	3	3	0	10.08	0.47
biological_process	GO:0045901	positive regulation of translational elongation	3	3	0	10.08	0.47
biological_process	GO:2000218	negative regulation of invasive growth in response to glucose limitation	3	3	0	10.08	0.47
biological_process	GO:0035957	positive regulation of starch catabolic process by positive regulation of transcription from RNA polymerase II promoter	3	3	0	10.08	0.47
biological_process	GO:0045948	positive regulation of translational initiation	3	3	0	10.08	0.47
molecular_function	GO:0001094	TFIID-class transcription factor binding	3	4	0	7.56	0.47
cellular_component	GO:0030869	RENT complex	3	4	0	7.56	0.47
cellular_component	GO:0030014	CCR4-NOT complex	3	4	0	7.56	0.47
cellular_component	GO:0071819	DUBm complex	3	4	0	7.56	0.47
cellular_component	GO:0070822	Sin3-type complex	3	4	0	7.56	0.47
biological_process	GO:0000019	regulation of mitotic recombination	3	4	0	7.56	0.47
biological_process	GO:0031335	regulation of sulfur amino acid metabolic process	3	4	0	7.56	0.47
biological_process	GO:0016578	histone deubiquitination	3	4	0	7.56	0.47
molecular_function	GO:0043141	ATP-dependent 5'-3' DNA helicase activity	3	5	0	6.05	0.47
molecular_function	GO:0016407	acetyltransferase activity	3	5	0	6.05	0.47
cellular_component	GO:0005641	nuclear envelope lumen	3	5	0	6.05	0.47
cellular_component	GO:0048471	perinuclear region of cytoplasm	3	5	0	6.05	0.47
cellular_component	GO:0032545	CURI complex	3	5	0	6.05	0.47
biological_process	GO:0016242	negative regulation of macroautophagy	3	5	0	6.05	0.47
biological_process	GO:0006452	translational frameshifting	3	5	0	6.05	0.47
biological_process	GO:0001113	transcriptional open complex formation at RNA polymerase II promoter	3	5	0	6.05	0.47
biological_process	GO:0031087	deadenylation-independent decapping of nuclear-transcribed mRNA	3	5	0	6.05	0.47
biological_process	GO:0006370	7-methylguanosine mRNA capping	3	5	0	6.05	0.47
biological_process	GO:0035376	sterol import	3	5	0	6.05	0.47
biological_process	GO:0001324	age-dependent response to oxidative stress involved in chronological cell aging	3	5	0	6.05	0.47
biological_process	GO:0006012	galactose metabolic process	3	5	0	6.05	0.47
molecular_function	GO:0008143	poly(A) RNA binding	3	6	0	5.04	0.47
molecular_function	GO:0001139	core RNA polymerase II recruiting transcription factor activity	3	6	0	5.04	0.47
cellular_component	GO:0042555	MCM complex	3	6	0	5.04	0.47
biological_process	GO:0046685	response to arsenic-containing substance	3	6	0	5.04	0.47
molecular_function	GO:0019904	protein domain specific binding	3	7	0	4.32	0.47
cellular_component	GO:0005671	Ada2/Gcn5/Ada3 transcription activator complex	3	7	0	4.32	0.47
cellular_component	GO:0000785	chromatin	3	7	0	4.32	0.47
cellular_component	GO:0070209	ASTRA complex	3	7	0	4.32	0.47
biological_process	GO:0042149	cellular response to glucose starvation	3	7	0	4.32	0.47
biological_process	GO:0000184	nuclear-transcribed mRNA catabolic process, nonsense-mediated decay	3	7	0	4.32	0.47
biological_process	GO:0070550	rDNA condensation	3	7	0	4.32	0.47
molecular_function	GO:0003712	transcription cofactor activity	3	8	0	3.78	0.47
cellular_component	GO:0000164	protein phosphatase type 1 complex	3	8	0	3.78	0.47
biological_process	GO:0000972	transcription-dependent tethering of RNA polymerase II gene DNA at nuclear periphery	3	8	0	3.78	0.47
biological_process	GO:0034605	cellular response to heat	3	9	0	3.36	0.47
biological_process	GO:0006972	hyperosmotic response	3	9	0	3.36	0.47
cellular_component	GO:0005657	replication fork	3	10	0	3.02	0.47
biological_process	GO:0006878	cellular copper ion homeostasis	3	10	0	3.02	0.47
biological_process	GO:0000290	deadenylation-dependent decapping of nuclear-transcribed mRNA	3	10	0	3.02	0.47
molecular_function	GO:0017025	TBP-class protein binding	3	11	0	2.75	0.47
biological_process	GO:0006006	glucose metabolic process	3	11	0	2.75	0.47
molecular_function	GO:0008270	zinc ion binding	3	12	0	2.52	0.47
molecular_function	GO:0030234	enzyme regulator activity	3	12	0	2.52	0.47
biological_process	GO:0042138	meiotic DNA double-strand break formation	3	12	0	2.52	0.47
molecular_function	GO:0003746	translation elongation factor activity	3	13	0	2.33	0.47
biological_process	GO:0006310	DNA recombination	3	13	0	2.33	0.47
biological_process	GO:0009651	response to salt stress	3	13	0	2.33	0.47
biological_process	GO:0007117	budding cell bud growth	3	14	0	2.16	0.47
biological_process	GO:0009272	fungal-type cell wall biogenesis	3	14	0	2.16	0.47
biological_process	GO:0006284	base-excision repair	3	14	0	2.16	0.47
molecular_function	GO:0003755	peptidyl-prolyl cis-trans isomerase activity	3	15	0	2.02	0.47
biological_process	GO:0000747	conjugation with cellular fusion	3	16	0	1.89	0.46
biological_process	GO:0009408	response to heat	3	16	0	1.89	0.46
biological_process	GO:0007096	regulation of exit from mitosis	3	18	0	1.68	0.46
biological_process	GO:0000011	vacuole inheritance	3	18	0	1.68	0.46
biological_process	GO:0000079	regulation of cyclin-dependent protein kinase activity	3	19	0	1.59	0.46
biological_process	GO:0042493	response to drug	3	23	0	1.32	0.46
molecular_function	GO:0008757	S-adenosylmethionine-dependent methyltransferase activity	3	24	0	1.26	0.46
molecular_function	GO:0004004	ATP-dependent RNA helicase activity	3	25	0	1.21	0.46
biological_process	GO:0000282	cellular bud site selection	3	25	0	1.21	0.46
cellular_component	GO:0005783	endoplasmic reticulum	4	234	0	0.17	0.46
biological_process	GO:0006413	translational initiation	3	31	0	0.98	0.45
biological_process	GO:0043161	proteasomal ubiquitin-dependent protein catabolic process	3	36	0	0.84	0.45
cellular_component	GO:0030176	integral to endoplasmic reticulum membrane	3	40	0	0.76	0.45
biological_process	GO:0006623	protein targeting to vacuole	3	48	0	0.63	0.44
biological_process	GO:0006897	endocytosis	3	74	0	0.41	0.43
cellular_component	GO:0016020	membrane	3	89	0	0.34	0.42
cellular_component	GO:0000329	fungal-type vacuole membrane	3	124	0	0.24	0.4
molecular_function	GO:0042054	histone methyltransferase activity	2	2	0	10.08	0.32
molecular_function	GO:0001012	RNA polymerase II regulatory region DNA binding	2	2	0	10.08	0.32
molecular_function	GO:0001106	RNA polymerase II transcription corepressor activity	2	2	0	10.08	0.32
molecular_function	GO:0001071	nucleic acid binding transcription factor activity	2	2	0	10.08	0.32
molecular_function	GO:0030291	protein serine/threonine kinase inhibitor activity	2	2	0	10.08	0.32
molecular_function	GO:0001010	sequence-specific DNA binding transcription factor recruiting transcription factor activity	2	2	0	10.08	0.32
molecular_function	GO:0042826	histone deacetylase binding	2	2	0	10.08	0.32
molecular_function	GO:0030527	structural constituent of chromatin	2	2	0	10.08	0.32
molecular_function	GO:0045129	NAD-independent histone deacetylase activity	2	2	0	10.08	0.32
molecular_function	GO:0000980	RNA polymerase II distal enhancer sequence-specific DNA binding	2	2	0	10.08	0.32
molecular_function	GO:0001965	G-protein alpha-subunit binding	2	2	0	10.08	0.32
molecular_function	GO:0000900	translation repressor activity, nucleic acid binding	2	2	0	10.08	0.32
molecular_function	GO:0004702	receptor signaling protein serine/threonine kinase activity	2	2	0	10.08	0.32
molecular_function	GO:0010484	H3 histone acetyltransferase activity	2	2	0	10.08	0.32
molecular_function	GO:0005092	GDP-dissociation inhibitor activity	2	2	0	10.08	0.32
molecular_function	GO:0045142	triplex DNA binding	2	2	0	10.08	0.32
molecular_function	GO:0001089	TFIIF-class binding transcription factor activity	2	2	0	10.08	0.32
molecular_function	GO:0031493	nucleosomal histone binding	2	2	0	10.08	0.32
molecular_function	GO:0008420	CTD phosphatase activity	2	2	0	10.08	0.32
molecular_function	GO:0036033	mediator complex binding	2	2	0	10.08	0.32
cellular_component	GO:0043564	Ku70:Ku80 complex	2	2	0	10.08	0.32
cellular_component	GO:0032044	DSIF complex	2	2	0	10.08	0.32
cellular_component	GO:0008023	transcription elongation factor complex	2	2	0	10.08	0.32
cellular_component	GO:0031934	mating-type region heterochromatin	2	2	0	10.08	0.32
cellular_component	GO:0017054	negative cofactor 2 complex	2	2	0	10.08	0.32
cellular_component	GO:0005720	nuclear heterochromatin	2	2	0	10.08	0.32
cellular_component	GO:0017053	transcriptional repressor complex	2	2	0	10.08	0.32
cellular_component	GO:0035101	FACT complex	2	2	0	10.08	0.32
biological_process	GO:0070417	cellular response to cold	2	2	0	10.08	0.32
biological_process	GO:0061402	positive regulation of transcription from RNA polymerase II promoter in response to acidity	2	2	0	10.08	0.32
biological_process	GO:0070869	heterochromatin assembly involved in chromatin silencing	2	2	0	10.08	0.32
biological_process	GO:1900472	positive regulation of phosphatidylcholine biosynthetic process by positive regulation of transcription from RNA polymerase II promoter	2	2	0	10.08	0.32
biological_process	GO:0045945	positive regulation of transcription from RNA polymerase III promoter	2	2	0	10.08	0.32
biological_process	GO:0051571	positive regulation of histone H3-K4 methylation	2	2	0	10.08	0.32
biological_process	GO:0001198	negative regulation of mating-type specific transcription from RNA polymerase II promoter	2	2	0	10.08	0.32
biological_process	GO:1900375	positive regulation of inositol biosynthetic process by positive regulation of transcription from RNA polymerase II promoter	2	2	0	10.08	0.32
biological_process	GO:0006259	DNA metabolic process	2	2	0	10.08	0.32
biological_process	GO:0060261	positive regulation of transcription initiation from RNA polymerase II promoter	2	2	0	10.08	0.32
biological_process	GO:0016480	negative regulation of transcription from RNA polymerase III promoter	2	2	0	10.08	0.32
biological_process	GO:0010833	telomere maintenance via telomere lengthening	2	2	0	10.08	0.32
biological_process	GO:0007000	nucleolus organization	2	2	0	10.08	0.32
biological_process	GO:0061409	positive regulation of transcription from RNA polymerase II promoter in response to freezing	2	2	0	10.08	0.32
biological_process	GO:0045937	positive regulation of phosphate metabolic process	2	2	0	10.08	0.32
biological_process	GO:0061411	positive regulation of transcription from RNA polymerase II promoter in response to cold	2	2	0	10.08	0.32
biological_process	GO:0010673	positive regulation of transcription from RNA polymerase II promoter during meiosis	2	2	0	10.08	0.32
biological_process	GO:0035961	positive regulation of ergosterol biosynthetic process by positive regulation of transcription from RNA polymerase II promoter	2	2	0	10.08	0.32
biological_process	GO:0033683	nucleotide-excision repair, DNA incision	2	2	0	10.08	0.32
biological_process	GO:0070933	histone H4 deacetylation	2	2	0	10.08	0.32
biological_process	GO:0090399	replicative senescence	2	2	0	10.08	0.32
biological_process	GO:0036083	positive regulation of unsaturated fatty acid biosynthetic process by positive regulation of transcription from RNA polymerase II promoter	2	2	0	10.08	0.32
biological_process	GO:0034644	cellular response to UV	2	2	0	10.08	0.32
biological_process	GO:1900464	negative regulation of cellular hyperosmotic salinity response by negative regulation of transcription from RNA polymerase II promoter	2	2	0	10.08	0.32
biological_process	GO:1900008	negative regulation of extrachromosomal rDNA circle accumulation involved in replicative cell aging	2	2	0	10.08	0.32
biological_process	GO:0061407	positive regulation of transcription from RNA polymerase II promoter in response to hydrogen peroxide	2	2	0	10.08	0.32
biological_process	GO:2001020	regulation of response to DNA damage stimulus	2	2	0	10.08	0.32
biological_process	GO:0070134	positive regulation of mitochondrial translational initiation	2	2	0	10.08	0.32
biological_process	GO:0050849	negative regulation of calcium-mediated signaling	2	2	0	10.08	0.32
biological_process	GO:0061401	positive regulation of transcription from RNA polymerase II promoter in response to a hypotonic environment	2	2	0	10.08	0.32
biological_process	GO:1900525	positive regulation of phosphatidylserine biosynthetic process by positive regulation of transcription from RNA polymerase II promoter	2	2	0	10.08	0.32
biological_process	GO:0097236	positive regulation of transcription from RNA polymerase II promoter in response to zinc ion starvation	2	2	0	10.08	0.32
biological_process	GO:0036086	positive regulation of transcription from RNA polymerase II promoter in response to iron ion starvation	2	2	0	10.08	0.32
biological_process	GO:0090419	negative regulation of transcription involved in G2/M-phase of mitotic cell cycle	2	2	0	10.08	0.32
biological_process	GO:0051091	positive regulation of sequence-specific DNA binding transcription factor activity	2	2	0	10.08	0.32
biological_process	GO:0061429	positive regulation of transcription from RNA polymerase II promoter by oleic acid	2	2	0	10.08	0.32
biological_process	GO:2000616	negative regulation of histone H3-K9 acetylation	2	2	0	10.08	0.32
biological_process	GO:0061392	regulation of transcription from RNA polymerase II promoter in response to osmotic stress	2	2	0	10.08	0.32
biological_process	GO:0031138	negative regulation of conjugation with cellular fusion	2	2	0	10.08	0.32
biological_process	GO:1900471	negative regulation of inositol biosynthetic process by negative regulation of transcription from RNA polymerase II promoter	2	2	0	10.08	0.32
biological_process	GO:2001208	negative regulation of transcription elongation from RNA polymerase I promoter	2	2	0	10.08	0.32
biological_process	GO:0032000	positive regulation of fatty acid beta-oxidation	2	2	0	10.08	0.32
biological_process	GO:0031440	regulation of mRNA 3'-end processing	2	2	0	10.08	0.32
biological_process	GO:0045905	positive regulation of translational termination	2	2	0	10.08	0.32
biological_process	GO:0034728	nucleosome organization	2	2	0	10.08	0.32
biological_process	GO:0061406	positive regulation of transcription from RNA polymerase II promoter in response to glucose starvation	2	2	0	10.08	0.32
biological_process	GO:0070130	negative regulation of mitochondrial translation	2	2	0	10.08	0.32
biological_process	GO:2001163	regulation of phosphorylation of RNA polymerase II C-terminal domain serine 2 residues	2	2	0	10.08	0.32
biological_process	GO:0000749	response to pheromone involved in conjugation with cellular fusion	2	2	0	10.08	0.32
biological_process	GO:0045936	negative regulation of phosphate metabolic process	2	2	0	10.08	0.32
biological_process	GO:0070870	heterochromatin maintenance involved in chromatin silencing	2	2	0	10.08	0.32
biological_process	GO:0010691	negative regulation of ribosomal protein gene transcription from RNA polymerase II promoter in response to nutrient levels	2	2	0	10.08	0.32
biological_process	GO:2000531	regulation of fatty acid biosynthetic process by regulation of transcription from RNA polymerase II promoter	2	2	0	10.08	0.32
biological_process	GO:0008156	negative regulation of DNA replication	2	2	0	10.08	0.32
biological_process	GO:0006343	establishment of chromatin silencing	2	2	0	10.08	0.32
biological_process	GO:0061405	positive regulation of transcription from RNA polymerase II promoter in response to hydrostatic pressure	2	2	0	10.08	0.32
biological_process	GO:0010390	histone monoubiquitination	2	2	0	10.08	0.32
biological_process	GO:0006448	regulation of translational elongation	2	2	0	10.08	0.32
biological_process	GO:0010688	negative regulation of ribosomal protein gene transcription from RNA polymerase II promoter	2	2	0	10.08	0.32
biological_process	GO:0061434	regulation of replicative cell aging by regulation of transcription from RNA polymerase II promoter in response to caloric restriction	2	2	0	10.08	0.32
biological_process	GO:0048026	positive regulation of mRNA splicing, via spliceosome	2	2	0	10.08	0.32
biological_process	GO:0046459	short-chain fatty acid metabolic process	2	2	0	10.08	0.32
biological_process	GO:0007569	cell aging	2	2	0	10.08	0.32
biological_process	GO:0090295	nitrogen catabolite repression of transcription	2	2	0	10.08	0.32
biological_process	GO:0071456	cellular response to hypoxia	2	2	0	10.08	0.32
biological_process	GO:0097201	negative regulation of transcription from RNA polymerase II promoter in response to stress	2	2	0	10.08	0.32
biological_process	GO:0061403	positive regulation of transcription from RNA polymerase II promoter in response to nitrosative stress	2	2	0	10.08	0.32
biological_process	GO:0034396	negative regulation of transcription from RNA polymerase II promoter in response to iron	2	2	0	10.08	0.32
biological_process	GO:2001166	regulation of histone H2B ubiquitination	2	2	0	10.08	0.32
biological_process	GO:0080182	histone H3-K4 trimethylation	2	2	0	10.08	0.32
biological_process	GO:0071441	negative regulation of histone H3-K14 acetylation	2	2	0	10.08	0.32
biological_process	GO:0071475	cellular hyperosmotic salinity response	2	2	0	10.08	0.32
molecular_function	GO:0001181	core RNA polymerase I binding transcription factor activity	2	3	0	6.72	0.32
molecular_function	GO:0043021	ribonucleoprotein complex binding	2	3	0	6.72	0.32
molecular_function	GO:0003727	single-stranded RNA binding	2	3	0	6.72	0.32
molecular_function	GO:0051864	histone demethylase activity (H3-K36 specific)	2	3	0	6.72	0.32
cellular_component	GO:0005845	mRNA cap binding complex	2	3	0	6.72	0.32
cellular_component	GO:0032777	Piccolo NuA4 histone acetyltransferase complex	2	3	0	6.72	0.32
cellular_component	GO:0030874	nucleolar chromatin	2	3	0	6.72	0.32
cellular_component	GO:0005678	chromatin assembly complex	2	3	0	6.72	0.32
cellular_component	GO:0000159	protein phosphatase type 2A complex	2	3	0	6.72	0.32
biological_process	GO:0000304	response to singlet oxygen	2	3	0	6.72	0.32
biological_process	GO:0034724	DNA replication-independent nucleosome organization	2	3	0	6.72	0.32
biological_process	GO:0051300	spindle pole body organization	2	3	0	6.72	0.32
biological_process	GO:0006109	regulation of carbohydrate metabolic process	2	3	0	6.72	0.32
biological_process	GO:0010971	positive regulation of G2/M transition of mitotic cell cycle	2	3	0	6.72	0.32
biological_process	GO:0045950	negative regulation of mitotic recombination	2	3	0	6.72	0.32
molecular_function	GO:0051880	G-quadruplex DNA binding	2	4	0	5.04	0.31
molecular_function	GO:0001097	TFIIH-class transcription factor binding	2	4	0	5.04	0.31
molecular_function	GO:0008601	protein phosphatase type 2A regulator activity	2	4	0	5.04	0.31
molecular_function	GO:0031683	G-protein beta/gamma-subunit complex binding	2	4	0	5.04	0.31
molecular_function	GO:0019887	protein kinase regulator activity	2	4	0	5.04	0.31
cellular_component	GO:0031965	nuclear membrane	2	4	0	5.04	0.31
cellular_component	GO:0030529	ribonucleoprotein complex	2	4	0	5.04	0.31
cellular_component	GO:0097255	R2TP complex	2	4	0	5.04	0.31
cellular_component	GO:0042788	polysomal ribosome	2	4	0	5.04	0.31
biological_process	GO:0016577	histone demethylation	2	4	0	5.04	0.31
biological_process	GO:0009450	gamma-aminobutyric acid catabolic process	2	4	0	5.04	0.31
biological_process	GO:0051457	maintenance of protein location in nucleus	2	4	0	5.04	0.31
biological_process	GO:0046686	response to cadmium ion	2	4	0	5.04	0.31
biological_process	GO:0019358	nicotinate nucleotide salvage	2	4	0	5.04	0.31
biological_process	GO:0001111	promoter clearance from RNA polymerase II promoter	2	4	0	5.04	0.31
biological_process	GO:0071169	establishment of protein localization to chromatin	2	4	0	5.04	0.31
biological_process	GO:0060188	regulation of protein desumoylation	2	4	0	5.04	0.31
biological_process	GO:0032878	regulation of establishment or maintenance of cell polarity	2	4	0	5.04	0.31
molecular_function	GO:0001129	TBP-class protein binding RNA polymerase II transcription factor activity involved in preinitiation complex assembly	2	5	0	4.03	0.31
molecular_function	GO:0004679	AMP-activated protein kinase activity	2	5	0	4.03	0.31
molecular_function	GO:0004707	MAP kinase activity	2	5	0	4.03	0.31
cellular_component	GO:0031588	AMP-activated protein kinase complex	2	5	0	4.03	0.31
cellular_component	GO:0034448	EGO complex	2	5	0	4.03	0.31
biological_process	GO:0036228	protein targeting to nuclear inner membrane	2	5	0	4.03	0.31
biological_process	GO:0000078	cell shape checkpoint	2	5	0	4.03	0.31
biological_process	GO:0001174	transcriptional start site selection at RNA polymerase II promoter	2	5	0	4.03	0.31
biological_process	GO:0010255	glucose mediated signaling pathway	2	5	0	4.03	0.31
biological_process	GO:0034629	cellular protein complex localization	2	5	0	4.03	0.31
biological_process	GO:0051083	de novo' cotranslational protein folding	2	5	0	4.03	0.31
biological_process	GO:0006335	DNA replication-dependent nucleosome assembly	2	5	0	4.03	0.31
biological_process	GO:0006808	regulation of nitrogen utilization	2	5	0	4.03	0.31
biological_process	GO:0045732	positive regulation of protein catabolic process	2	5	0	4.03	0.31
molecular_function	GO:0000400	four-way junction DNA binding	2	6	0	3.36	0.31
cellular_component	GO:0031902	late endosome membrane	2	6	0	3.36	0.31
cellular_component	GO:0000781	chromosome, telomeric region	2	6	0	3.36	0.31
cellular_component	GO:0034399	nuclear periphery	2	6	0	3.36	0.31
cellular_component	GO:0044615	nuclear pore nuclear basket	2	6	0	3.36	0.31
biological_process	GO:0010525	regulation of transposition, RNA-mediated	2	6	0	3.36	0.31
biological_process	GO:0048478	replication fork protection	2	6	0	3.36	0.31
biological_process	GO:0042991	transcription factor import into nucleus	2	6	0	3.36	0.31
biological_process	GO:0007346	regulation of mitotic cell cycle	2	6	0	3.36	0.31
biological_process	GO:0000196	MAPK cascade involved in cell wall biogenesis	2	6	0	3.36	0.31
biological_process	GO:0034729	histone H3-K79 methylation	2	6	0	3.36	0.31
biological_process	GO:0006397	mRNA processing	2	6	0	3.36	0.31
biological_process	GO:0000492	box C/D snoRNP assembly	2	6	0	3.36	0.31
molecular_function	GO:0000175	3'-5'-exoribonuclease activity	2	7	0	2.88	0.31
cellular_component	GO:0005658	alpha DNA polymerase:primase complex	2	7	0	2.88	0.31
biological_process	GO:0071406	cellular response to methylmercury	2	7	0	2.88	0.31
biological_process	GO:0032447	protein urmylation	2	7	0	2.88	0.31
biological_process	GO:0040020	regulation of meiosis	2	7	0	2.88	0.31
biological_process	GO:0000076	DNA replication checkpoint	2	7	0	2.88	0.31
biological_process	GO:0060237	regulation of fungal-type cell wall organization	2	7	0	2.88	0.31
biological_process	GO:0043570	maintenance of DNA repeat elements	2	7	0	2.88	0.31
biological_process	GO:0034551	mitochondrial respiratory chain complex III assembly	2	7	0	2.88	0.31
biological_process	GO:0006388	tRNA splicing, via endonucleolytic cleavage and ligation	2	7	0	2.88	0.31
molecular_function	GO:0043047	single-stranded telomeric DNA binding	2	8	0	2.52	0.31
molecular_function	GO:0030295	protein kinase activator activity	2	8	0	2.52	0.31
cellular_component	GO:0043614	multi-eIF complex	2	8	0	2.52	0.31
biological_process	GO:0015758	glucose transport	2	8	0	2.52	0.31
biological_process	GO:0006383	transcription from RNA polymerase III promoter	2	8	0	2.52	0.31
molecular_function	GO:0019237	centromeric DNA binding	2	9	0	2.24	0.31
cellular_component	GO:0032126	eisosome	2	9	0	2.24	0.31
biological_process	GO:0000080	G1 phase of mitotic cell cycle	2	9	0	2.24	0.31
biological_process	GO:0019740	nitrogen utilization	2	9	0	2.24	0.31
biological_process	GO:0007010	cytoskeleton organization	2	9	0	2.24	0.31
biological_process	GO:0030846	termination of RNA polymerase II transcription, poly(A)-coupled	2	9	0	2.24	0.31
molecular_function	GO:0003724	RNA helicase activity	2	10	0	2.02	0.31
cellular_component	GO:0043596	nuclear replication fork	2	10	0	2.02	0.31
biological_process	GO:0070086	ubiquitin-dependent endocytosis	2	10	0	2.02	0.31
biological_process	GO:0007039	vacuolar protein catabolic process	2	10	0	2.02	0.31
biological_process	GO:0005977	glycogen metabolic process	2	10	0	2.02	0.31
biological_process	GO:0001402	signal transduction involved in filamentous growth	2	10	0	2.02	0.31
molecular_function	GO:0005507	copper ion binding	2	11	0	1.83	0.31
biological_process	GO:0007076	mitotic chromosome condensation	2	11	0	1.83	0.31
biological_process	GO:0000710	meiotic mismatch repair	2	11	0	1.83	0.31
biological_process	GO:0051276	chromosome organization	2	11	0	1.83	0.31
biological_process	GO:0006415	translational termination	2	11	0	1.83	0.31
molecular_function	GO:0003968	RNA-directed RNA polymerase activity	2	12	0	1.68	0.31
cellular_component	GO:0005665	DNA-directed RNA polymerase II, core complex	2	12	0	1.68	0.31
molecular_function	GO:0004871	signal transducer activity	2	13	0	1.55	0.31
biological_process	GO:0006999	nuclear pore organization	2	13	0	1.55	0.31
biological_process	GO:0030447	filamentous growth	2	13	0	1.55	0.31
biological_process	GO:0007265	Ras protein signal transduction	2	14	0	1.44	0.31
biological_process	GO:0030968	endoplasmic reticulum unfolded protein response	2	14	0	1.44	0.31
cellular_component	GO:0005847	mRNA cleavage and polyadenylation specificity factor complex	2	15	0	1.34	0.31
molecular_function	GO:0035091	phosphatidylinositol binding	2	16	0	1.26	0.31
molecular_function	GO:0042803	protein homodimerization activity	2	16	0	1.26	0.31
biological_process	GO:0006260	DNA replication	2	16	0	1.26	0.31
biological_process	GO:0006913	nucleocytoplasmic transport	2	16	0	1.26	0.31
biological_process	GO:0042026	protein refolding	2	16	0	1.26	0.31
biological_process	GO:0007118	budding cell apical bud growth	2	17	0	1.19	0.31
biological_process	GO:0031929	TOR signaling cascade	2	17	0	1.19	0.31
biological_process	GO:0006513	protein monoubiquitination	2	17	0	1.19	0.31
molecular_function	GO:0051087	chaperone binding	2	18	0	1.12	0.31
biological_process	GO:0007031	peroxisome organization	2	18	0	1.12	0.31
biological_process	GO:0033617	mitochondrial respiratory chain complex IV assembly	2	18	0	1.12	0.31
cellular_component	GO:0005685	U1 snRNP	2	19	0	1.06	0.31
biological_process	GO:0006378	mRNA polyadenylation	2	19	0	1.06	0.31
biological_process	GO:0016579	protein deubiquitination	2	19	0	1.06	0.31
molecular_function	GO:0004843	ubiquitin-specific protease activity	2	20	0	1.01	0.31
biological_process	GO:0030150	protein import into mitochondrial matrix	2	21	0	0.96	0.31
biological_process	GO:0006298	mismatch repair	2	21	0	0.96	0.31
cellular_component	GO:0000776	kinetochore	2	22	0	0.92	0.31
cellular_component	GO:0031305	integral to mitochondrial inner membrane	2	23	0	0.88	0.31
biological_process	GO:0042787	protein ubiquitination involved in ubiquitin-dependent protein catabolic process	2	23	0	0.88	0.31
biological_process	GO:0000055	ribosomal large subunit export from nucleus	2	23	0	0.88	0.31
cellular_component	GO:0005938	cell cortex	2	24	0	0.84	0.31
biological_process	GO:0000070	mitotic sister chromatid segregation	2	25	0	0.81	0.3
biological_process	GO:0006970	response to osmotic stress	2	27	0	0.75	0.3
biological_process	GO:0000910	cytokinesis	2	28	0	0.72	0.3
biological_process	GO:0006379	mRNA cleavage	2	28	0	0.72	0.3
biological_process	GO:0000422	mitochondrion degradation	2	29	0	0.7	0.3
biological_process	GO:0000002	mitochondrial genome maintenance	2	35	0	0.58	0.3
cellular_component	GO:0019898	extrinsic to membrane	2	37	0	0.54	0.3
biological_process	GO:0030476	ascospore wall assembly	2	43	0	0.47	0.3
molecular_function	GO:0030674	protein binding, bridging	2	44	0	0.46	0.3
biological_process	GO:0030433	ER-associated protein catabolic process	2	45	0	0.45	0.3
biological_process	GO:0006950	response to stress	2	49	0	0.41	0.29
cellular_component	GO:0030479	actin cortical patch	2	50	0	0.4	0.29
biological_process	GO:0009060	aerobic respiration	2	53	0	0.38	0.29
cellular_component	GO:0009277	fungal-type cell wall	2	86	0	0.23	0.28
cellular_component	GO:0000324	fungal-type vacuole	2	98	0	0.21	0.27
biological_process	GO:0006414	translational elongation	2	313	0	0.06	0.21
molecular_function	GO:0001138	TFIIH-class transcription factor recruiting transcription factor activity	1	1	0	10.08	0.16
molecular_function	GO:0048027	mRNA 5'-UTR binding	1	1	0	10.08	0.16
molecular_function	GO:0001084	TFIID-class binding transcription factor activity	1	1	0	10.08	0.16
molecular_function	GO:0010485	H4 histone acetyltransferase activity	1	1	0	10.08	0.16
molecular_function	GO:0046970	NAD-dependent histone deacetylase activity (H4-K16 specific)	1	1	0	10.08	0.16
molecular_function	GO:0032454	histone demethylase activity (H3-K9 specific)	1	1	0	10.08	0.16
molecular_function	GO:0030337	DNA polymerase processivity factor activity	1	1	0	10.08	0.16
molecular_function	GO:0004484	mRNA guanylyltransferase activity	1	1	0	10.08	0.16
molecular_function	GO:0033328	peroxisome membrane targeting sequence binding	1	1	0	10.08	0.16
molecular_function	GO:0001095	TFIIE-class transcription factor binding	1	1	0	10.08	0.16
molecular_function	GO:0004697	protein kinase C activity	1	1	0	10.08	0.16
molecular_function	GO:0003942	N-acetyl-gamma-glutamyl-phosphate reductase activity	1	1	0	10.08	0.16
molecular_function	GO:0001225	RNA polymerase II transcription coactivator binding	1	1	0	10.08	0.16
molecular_function	GO:0043110	rDNA spacer replication fork barrier binding	1	1	0	10.08	0.16
molecular_function	GO:0004345	glucose-6-phosphate dehydrogenase activity	1	1	0	10.08	0.16
molecular_function	GO:0008190	eukaryotic initiation factor 4E binding	1	1	0	10.08	0.16
molecular_function	GO:0000988	protein binding transcription factor activity	1	1	0	10.08	0.16
molecular_function	GO:0001088	TFIIE-class binding transcription factor activity	1	1	0	10.08	0.16
molecular_function	GO:0008440	inositol-1,4,5-trisphosphate 3-kinase activity	1	1	0	10.08	0.16
molecular_function	GO:0033149	FFAT motif binding	1	1	0	10.08	0.16
molecular_function	GO:0000823	inositol-1,4,5-trisphosphate 6-kinase activity	1	1	0	10.08	0.16
molecular_function	GO:0035242	protein-arginine omega-N asymmetric methyltransferase activity	1	1	0	10.08	0.16
molecular_function	GO:0043035	chromatin insulator sequence binding	1	1	0	10.08	0.16
molecular_function	GO:0003991	acetylglutamate kinase activity	1	1	0	10.08	0.16
molecular_function	GO:0008112	nicotinamide N-methyltransferase activity	1	1	0	10.08	0.16
molecular_function	GO:0004335	galactokinase activity	1	1	0	10.08	0.16
molecular_function	GO:0008349	MAP kinase kinase kinase kinase activity	1	1	0	10.08	0.16
molecular_function	GO:0000976	transcription regulatory region sequence-specific DNA binding	1	1	0	10.08	0.16
molecular_function	GO:0051730	GTP-dependent polyribonucleotide 5'-hydroxyl-kinase activity	1	1	0	10.08	0.16
molecular_function	GO:0001073	DNA binding transcription antitermination factor activity	1	1	0	10.08	0.16
molecular_function	GO:0000824	inositol tetrakisphosphate 3-kinase activity	1	1	0	10.08	0.16
molecular_function	GO:0001226	RNA polymerase II transcription corepressor binding	1	1	0	10.08	0.16
molecular_function	GO:0004694	eukaryotic translation initiation factor 2alpha kinase activity	1	1	0	10.08	0.16
molecular_function	GO:0000825	inositol tetrakisphosphate 6-kinase activity	1	1	0	10.08	0.16
molecular_function	GO:0046969	NAD-dependent histone deacetylase activity (H3-K9 specific)	1	1	0	10.08	0.16
molecular_function	GO:0001046	core promoter sequence-specific DNA binding	1	1	0	10.08	0.16
molecular_function	GO:0000983	RNA polymerase II core promoter sequence-specific DNA binding transcription factor activity	1	1	0	10.08	0.16
molecular_function	GO:0003972	RNA ligase (ATP) activity	1	1	0	10.08	0.16
molecular_function	GO:0008936	nicotinamidase activity	1	1	0	10.08	0.16
molecular_function	GO:0031072	heat shock protein binding	1	1	0	10.08	0.16
molecular_function	GO:0003730	mRNA 3'-UTR binding	1	1	0	10.08	0.16
molecular_function	GO:0051019	mitogen-activated protein kinase binding	1	1	0	10.08	0.16
molecular_function	GO:0019210	kinase inhibitor activity	1	1	0	10.08	0.16
molecular_function	GO:0004516	nicotinate phosphoribosyltransferase activity	1	1	0	10.08	0.16
molecular_function	GO:0044377	RNA polymerase II core promoter proximal region sequence-specific DNA binding, bending	1	1	0	10.08	0.16
molecular_function	GO:0046975	histone methyltransferase activity (H3-K36 specific)	1	1	0	10.08	0.16
molecular_function	GO:0031151	histone methyltransferase activity (H3-K79 specific)	1	1	0	10.08	0.16
molecular_function	GO:0044374	sequence-specific DNA binding, bending	1	1	0	10.08	0.16
molecular_function	GO:0001093	TFIIB-class transcription factor binding	1	1	0	10.08	0.16
molecular_function	GO:0001159	core promoter proximal region DNA binding	1	1	0	10.08	0.16
molecular_function	GO:0008073	ornithine decarboxylase inhibitor activity	1	1	0	10.08	0.16
molecular_function	GO:0005098	Ran GTPase activator activity	1	1	0	10.08	0.16
molecular_function	GO:0032041	NAD-dependent histone deacetylase activity (H3-K14 specific)	1	1	0	10.08	0.16
molecular_function	GO:0072542	protein phosphatase activator activity	1	1	0	10.08	0.16
molecular_function	GO:0033613	activating transcription factor binding	1	1	0	10.08	0.16
molecular_function	GO:0035174	histone serine kinase activity	1	1	0	10.08	0.16
molecular_function	GO:0001202	copper ion regulated core promoter proximal region sequence-specific DNA binding RNA polymerase II transcription factor activity	1	1	0	10.08	0.16
molecular_function	GO:0035004	phosphatidylinositol 3-kinase activity	1	1	0	10.08	0.16
molecular_function	GO:0033558	protein deacetylase activity	1	1	0	10.08	0.16
cellular_component	GO:0043626	PCNA complex	1	1	0	10.08	0.16
cellular_component	GO:0015934	large ribosomal subunit	1	1	0	10.08	0.16
cellular_component	GO:0000936	primary cell septum	1	1	0	10.08	0.16
biological_process	GO:0032872	regulation of stress-activated MAPK cascade	1	1	0	10.08	0.16
biological_process	GO:0032436	positive regulation of proteasomal ubiquitin-dependent protein catabolic process	1	1	0	10.08	0.16
biological_process	GO:0031848	protection from non-homologous end joining at telomere	1	1	0	10.08	0.16
biological_process	GO:1900622	positive regulation of transcription from RNA polymerase II promoter by calcium-mediated signaling	1	1	0	10.08	0.16
biological_process	GO:0010794	regulation of dolichol biosynthetic process	1	1	0	10.08	0.16
biological_process	GO:2001196	positive regulation of lysine biosynthetic process via alpha-aminoadipate and saccharopine	1	1	0	10.08	0.16
biological_process	GO:0010845	positive regulation of reciprocal meiotic recombination	1	1	0	10.08	0.16
biological_process	GO:0046324	regulation of glucose import	1	1	0	10.08	0.16
biological_process	GO:0000414	regulation of histone H3-K36 methylation	1	1	0	10.08	0.16
biological_process	GO:0061428	negative regulation of transcription from RNA polymerase II promoter in response to hypoxia	1	1	0	10.08	0.16
biological_process	GO:0000115	regulation of transcription involved in S phase of mitotic cell cycle	1	1	0	10.08	0.16
biological_process	GO:0000415	negative regulation of histone H3-K36 methylation	1	1	0	10.08	0.16
biological_process	GO:0006990	positive regulation of transcription from RNA polymerase II promoter involved in unfolded protein response	1	1	0	10.08	0.16
biological_process	GO:0006608	snRNP protein import into nucleus	1	1	0	10.08	0.16
biological_process	GO:0009063	cellular amino acid catabolic process	1	1	0	10.08	0.16
biological_process	GO:1900462	negative regulation of pseudohyphal growth by negative regulation of transcription from RNA polymerase II promoter	1	1	0	10.08	0.16
biological_process	GO:0051037	regulation of transcription during meiosis	1	1	0	10.08	0.16
biological_process	GO:0060275	maintenance of stationary phase in response to starvation	1	1	0	10.08	0.16
biological_process	GO:0018293	protein-FAD linkage	1	1	0	10.08	0.16
biological_process	GO:0061419	positive regulation of transcription from RNA polymerase II promoter in response to hypoxia	1	1	0	10.08	0.16
biological_process	GO:0061399	positive regulation of transcription from RNA polymerase II promoter in response to cobalt ion	1	1	0	10.08	0.16
biological_process	GO:0009074	aromatic amino acid family catabolic process	1	1	0	10.08	0.16
biological_process	GO:0006408	snRNA export from nucleus	1	1	0	10.08	0.16
biological_process	GO:0090204	protein localization to nuclear pore	1	1	0	10.08	0.16
biological_process	GO:0097239	positive regulation of transcription from RNA polymerase II promoter in response to methylglyoxal	1	1	0	10.08	0.16
biological_process	GO:0045930	negative regulation of mitotic cell cycle	1	1	0	10.08	0.16
biological_process	GO:2000749	positive regulation of chromatin silencing at rDNA	1	1	0	10.08	0.16
biological_process	GO:1900473	negative regulation of phosphatidylcholine biosynthetic process by negative regulation of transcription from RNA polymerase II promoter	1	1	0	10.08	0.16
biological_process	GO:0061427	negative regulation of ceramide biosynthetic process by negative regulation of transcription from RNA Polymerase II promoter	1	1	0	10.08	0.16
biological_process	GO:0031494	regulation of mating type switching	1	1	0	10.08	0.16
biological_process	GO:0009301	snRNA transcription	1	1	0	10.08	0.16
biological_process	GO:0060258	negative regulation of filamentous growth	1	1	0	10.08	0.16
biological_process	GO:0010527	positive regulation of transposition, RNA-mediated	1	1	0	10.08	0.16
biological_process	GO:0043418	homocysteine catabolic process	1	1	0	10.08	0.16
biological_process	GO:0032377	regulation of intracellular lipid transport	1	1	0	10.08	0.16
biological_process	GO:0010689	negative regulation of ribosomal protein gene transcription from RNA polymerase II promoter in response to chemical stimulus	1	1	0	10.08	0.16
biological_process	GO:0006038	cell wall chitin biosynthetic process	1	1	0	10.08	0.16
biological_process	GO:2000238	regulation of tRNA export from nucleus	1	1	0	10.08	0.16
biological_process	GO:0010768	negative regulation of transcription from RNA polymerase II promoter in response to UV-induced DNA damage	1	1	0	10.08	0.16
biological_process	GO:0061418	regulation of transcription from RNA polymerase II promoter in response to hypoxia	1	1	0	10.08	0.16
biological_process	GO:1900079	regulation of arginine biosynthetic process	1	1	0	10.08	0.16
biological_process	GO:0060260	regulation of transcription initiation from RNA polymerase II promoter	1	1	0	10.08	0.16
biological_process	GO:0034244	negative regulation of transcription elongation from RNA polymerase II promoter	1	1	0	10.08	0.16
biological_process	GO:0090203	transcriptional activation by promoter-terminator looping	1	1	0	10.08	0.16
biological_process	GO:0090054	regulation of chromatin silencing at silent mating-type cassette	1	1	0	10.08	0.16
biological_process	GO:0097235	positive regulation of fatty acid beta-oxidation by positive regulation of transcription from RNA polymerase II promoter	1	1	0	10.08	0.16
biological_process	GO:0045898	regulation of RNA polymerase II transcriptional preinitiation complex assembly	1	1	0	10.08	0.16
biological_process	GO:0045013	carbon catabolite repression of transcription	1	1	0	10.08	0.16
biological_process	GO:0035390	establishment of chromatin silencing at telomere	1	1	0	10.08	0.16
biological_process	GO:0010571	positive regulation of DNA replication involved in S phase	1	1	0	10.08	0.16
biological_process	GO:1900051	positive regulation of histone exchange	1	1	0	10.08	0.16
biological_process	GO:0043558	regulation of translational initiation in response to stress	1	1	0	10.08	0.16
biological_process	GO:1900526	negative regulation of phosphatidylserine biosynthetic process by negative regulation of transcription from RNA polymerase II promoter	1	1	0	10.08	0.16
biological_process	GO:0010628	positive regulation of gene expression	1	1	0	10.08	0.16
biological_process	GO:0044154	histone H3-K14 acetylation	1	1	0	10.08	0.16
biological_process	GO:0033184	positive regulation of histone ubiquitination	1	1	0	10.08	0.16
biological_process	GO:0010895	negative regulation of ergosterol biosynthetic process	1	1	0	10.08	0.16
biological_process	GO:0009302	snoRNA transcription	1	1	0	10.08	0.16
biological_process	GO:0060567	negative regulation of DNA-dependent transcription, termination	1	1	0	10.08	0.16
biological_process	GO:0034983	peptidyl-lysine deacetylation	1	1	0	10.08	0.16
biological_process	GO:0060962	regulation of ribosomal protein gene transcription from RNA polymerase II promoter	1	1	0	10.08	0.16
biological_process	GO:0061158	3'-UTR-mediated mRNA destabilization	1	1	0	10.08	0.16
biological_process	GO:0010796	regulation of multivesicular body size	1	1	0	10.08	0.16
biological_process	GO:0061432	regulation of transcription from RNA polymerase II promoter in response to methionine	1	1	0	10.08	0.16
biological_process	GO:0031507	heterochromatin assembly	1	1	0	10.08	0.16
biological_process	GO:0001197	positive regulation of mating-type specific transcription from RNA polymerase II promoter	1	1	0	10.08	0.16
biological_process	GO:0042992	negative regulation of transcription factor import into nucleus	1	1	0	10.08	0.16
biological_process	GO:0070827	chromatin maintenance	1	1	0	10.08	0.16
biological_process	GO:0019220	regulation of phosphate metabolic process	1	1	0	10.08	0.16
biological_process	GO:0006769	nicotinamide metabolic process	1	1	0	10.08	0.16
biological_process	GO:2001043	positive regulation of cytokinetic cell separation involved in cell cycle cytokinesis	1	1	0	10.08	0.16
biological_process	GO:0071930	negative regulation of transcription involved in G1/S phase of mitotic cell cycle	1	1	0	10.08	0.16
biological_process	GO:0071276	cellular response to cadmium ion	1	1	0	10.08	0.16
biological_process	GO:0006451	translational readthrough	1	1	0	10.08	0.16
biological_process	GO:0007074	positive regulation of transcription on exit from mitosis, from RNA polymerase II promoter	1	1	0	10.08	0.16
biological_process	GO:0061400	positive regulation of transcription from RNA polymerase II promoter in response to calcium ion	1	1	0	10.08	0.16
biological_process	GO:0035307	positive regulation of protein dephosphorylation	1	1	0	10.08	0.16
biological_process	GO:0010892	positive regulation of mitochondrial translation in response to stress	1	1	0	10.08	0.16
biological_process	GO:0016458	gene silencing	1	1	0	10.08	0.16
biological_process	GO:0007190	activation of adenylate cyclase activity	1	1	0	10.08	0.16
biological_process	GO:0070932	histone H3 deacetylation	1	1	0	10.08	0.16
biological_process	GO:0031064	negative regulation of histone deacetylation	1	1	0	10.08	0.16
biological_process	GO:0035822	gene conversion	1	1	0	10.08	0.16
biological_process	GO:0071322	cellular response to carbohydrate stimulus	1	1	0	10.08	0.16
biological_process	GO:0060303	regulation of nucleosome density	1	1	0	10.08	0.16
biological_process	GO:2000235	regulation of tRNA processing	1	1	0	10.08	0.16
biological_process	GO:0001079	nitrogen catabolite regulation of transcription from RNA polymerase II promoter	1	1	0	10.08	0.16
biological_process	GO:0061435	positive regulation of transcription from a mobile element promoter	1	1	0	10.08	0.16
biological_process	GO:0061420	regulation of transcription from RNA polymerase II promoter in response to biotin starvation	1	1	0	10.08	0.16
biological_process	GO:1900477	negative regulation of G1/S transition of mitotic cell cycle by negative regulation of transcription from RNA polymerase II promoter	1	1	0	10.08	0.16
biological_process	GO:0061415	negative regulation of transcription from RNA polymerase II promoter by a nonfermentable carbon source	1	1	0	10.08	0.16
biological_process	GO:0051447	negative regulation of meiotic cell cycle	1	1	0	10.08	0.16
biological_process	GO:0090055	positive regulation of chromatin silencing at silent mating-type cassette	1	1	0	10.08	0.16
biological_process	GO:0046835	carbohydrate phosphorylation	1	1	0	10.08	0.16
biological_process	GO:2000203	regulation of ribosomal large subunit export from nucleus	1	1	0	10.08	0.16
biological_process	GO:0010898	positive regulation of triglyceride catabolic process	1	1	0	10.08	0.16
biological_process	GO:0000413	protein peptidyl-prolyl isomerization	1	1	0	10.08	0.16
biological_process	GO:0034243	regulation of transcription elongation from RNA polymerase II promoter	1	1	0	10.08	0.16
biological_process	GO:0071474	cellular hyperosmotic response	1	1	0	10.08	0.16
biological_process	GO:0010568	regulation of budding cell apical bud growth	1	1	0	10.08	0.16
biological_process	GO:0061423	positive regulation of sodium ion transport by positive regulation of transcription from RNA polymerase II promoter	1	1	0	10.08	0.16
biological_process	GO:1900463	negative regulation of cellular response to alkalinity by negative regulation of transcription from RNA polymerase II promoter	1	1	0	10.08	0.16
biological_process	GO:0010569	regulation of double-strand break repair via homologous recombination	1	1	0	10.08	0.16
biological_process	GO:0071468	cellular response to acidity	1	1	0	10.08	0.16
biological_process	GO:0097301	regulation of potassium ion concentration by positive regulation of transcription from RNA polymerase II promoter	1	1	0	10.08	0.16
biological_process	GO:0090180	positive regulation of thiamine biosynthetic process	1	1	0	10.08	0.16
biological_process	GO:0032007	negative regulation of TOR signaling cascade	1	1	0	10.08	0.16
biological_process	GO:1900478	positive regulation of sulfate assimilation by positive regulation of transcription from RNA polymerase II promoter	1	1	0	10.08	0.16
biological_process	GO:0010621	negative regulation of transcription by transcription factor localization	1	1	0	10.08	0.16
biological_process	GO:1900364	negative regulation of mRNA polyadenylation	1	1	0	10.08	0.16
biological_process	GO:0045723	positive regulation of fatty acid biosynthetic process	1	1	0	10.08	0.16
biological_process	GO:0010795	regulation of ubiquinone biosynthetic process	1	1	0	10.08	0.16
biological_process	GO:1900153	positive regulation of nuclear-transcribed mRNA catabolic process, deadenylation-dependent decay	1	1	0	10.08	0.16
biological_process	GO:0046677	response to antibiotic	1	1	0	10.08	0.16
biological_process	GO:0043971	histone H3-K18 acetylation	1	1	0	10.08	0.16
biological_process	GO:0000432	positive regulation of transcription from RNA polymerase II promoter by glucose	1	1	0	10.08	0.16
biological_process	GO:0035959	positive regulation of glyoxylate cycle by positive regulation of transcription from RNA polymerase II promoter	1	1	0	10.08	0.16
biological_process	GO:0090418	positive regulation of transcription involved in S-phase of mitotic cell cycle	1	1	0	10.08	0.16
biological_process	GO:0032055	negative regulation of translation in response to stress	1	1	0	10.08	0.16
biological_process	GO:0045185	maintenance of protein location	1	1	0	10.08	0.16
biological_process	GO:0010606	positive regulation of cytoplasmic mRNA processing body assembly	1	1	0	10.08	0.16
biological_process	GO:0031648	protein destabilization	1	1	0	10.08	0.16
biological_process	GO:0034225	regulation of transcription from RNA polymerase II promoter in response to zinc ion starvation	1	1	0	10.08	0.16
biological_process	GO:0060213	positive regulation of nuclear-transcribed mRNA poly(A) tail shortening	1	1	0	10.08	0.16
biological_process	GO:1900466	positive regulation of arginine biosynthetic process by positive regulation of transcription from RNA polymerase II promoter	1	1	0	10.08	0.16
biological_process	GO:0006801	superoxide metabolic process	1	1	0	10.08	0.16
biological_process	GO:0061424	positive regulation of peroxisome organization by positive regulation of transcription from RNA polymerase II promoter	1	1	0	10.08	0.16
biological_process	GO:0000185	activation of MAPKKK activity	1	1	0	10.08	0.16
biological_process	GO:0070272	proton-transporting ATP synthase complex biogenesis	1	1	0	10.08	0.16
biological_process	GO:1900474	negative regulation of mating type switching by negative regulation of transcription from RNA polymerase II promoter	1	1	0	10.08	0.16
biological_process	GO:0016049	cell growth	1	1	0	10.08	0.16
biological_process	GO:0061426	positive regulation of sulfite transport by positive regulation of transcription from RNA polymerase II promoter	1	1	0	10.08	0.16
biological_process	GO:0000291	nuclear-transcribed mRNA catabolic process, exonucleolytic	1	1	0	10.08	0.16
biological_process	GO:0046015	regulation of transcription by glucose	1	1	0	10.08	0.16
biological_process	GO:0090294	nitrogen catabolite activation of transcription	1	1	0	10.08	0.16
biological_process	GO:0030837	negative regulation of actin filament polymerization	1	1	0	10.08	0.16
biological_process	GO:2000104	negative regulation of DNA-dependent DNA replication	1	1	0	10.08	0.16
biological_process	GO:0010723	positive regulation of transcription from RNA polymerase II promoter in response to iron	1	1	0	10.08	0.16
biological_process	GO:0017004	cytochrome complex assembly	1	1	0	10.08	0.16
biological_process	GO:2001172	positive regulation of glucose catabolic process to ethanol	1	1	0	10.08	0.16
biological_process	GO:0051446	positive regulation of meiotic cell cycle	1	1	0	10.08	0.16
biological_process	GO:1900081	regulation of arginine catabolic process	1	1	0	10.08	0.16
biological_process	GO:1900475	positive regulation of meiosis by negative regulation of transcription from RNA polymerase II promoter	1	1	0	10.08	0.16
biological_process	GO:0008652	cellular amino acid biosynthetic process	1	1	0	10.08	0.16
biological_process	GO:2001125	negative regulation of translational frameshifting	1	1	0	10.08	0.16
biological_process	GO:0035952	negative regulation of oligopeptide transport by negative regulation of transcription from RNA polymerase II promoter	1	1	0	10.08	0.16
biological_process	GO:2000805	negative regulation of termination of RNA polymerase II transcription, poly(A)-coupled	1	1	0	10.08	0.16
biological_process	GO:0010512	negative regulation of phosphatidylinositol biosynthetic process	1	1	0	10.08	0.16
biological_process	GO:0048025	negative regulation of mRNA splicing, via spliceosome	1	1	0	10.08	0.16
biological_process	GO:0031940	positive regulation of chromatin silencing at telomere	1	1	0	10.08	0.16
biological_process	GO:0034758	positive regulation of iron ion transport	1	1	0	10.08	0.16
biological_process	GO:0061416	regulation of transcription from RNA polymerase II promoter in response to salt stress	1	1	0	10.08	0.16
biological_process	GO:0061425	positive regulation of ethanol catabolic process by positive regulation of transcription from RNA polymerase II promoter	1	1	0	10.08	0.16
biological_process	GO:2001278	positive regulation of leucine biosynthetic process	1	1	0	10.08	0.16
biological_process	GO:0007624	ultradian rhythm	1	1	0	10.08	0.16
biological_process	GO:0033673	negative regulation of kinase activity	1	1	0	10.08	0.16
biological_process	GO:1900465	negative regulation of arginine catabolic process by negative regulation of transcription from RNA polymerase II promoter	1	1	0	10.08	0.16
biological_process	GO:0010944	negative regulation of transcription by competitive promoter binding	1	1	0	10.08	0.16
biological_process	GO:0007580	extrachromosomal circular DNA accumulation involved in cell aging	1	1	0	10.08	0.16
biological_process	GO:0050801	ion homeostasis	1	1	0	10.08	0.16
biological_process	GO:0043970	histone H3-K9 acetylation	1	1	0	10.08	0.16
biological_process	GO:0001081	nitrogen catabolite repression of transcription from RNA polymerase II promoter	1	1	0	10.08	0.16
biological_process	GO:0006039	cell wall chitin catabolic process	1	1	0	10.08	0.16
biological_process	GO:0070623	regulation of thiamine biosynthetic process	1	1	0	10.08	0.16
biological_process	GO:0048260	positive regulation of receptor-mediated endocytosis	1	1	0	10.08	0.16
biological_process	GO:0080163	regulation of protein serine/threonine phosphatase activity	1	1	0	10.08	0.16
biological_process	GO:0071466	cellular response to xenobiotic stimulus	1	1	0	10.08	0.16
biological_process	GO:2001158	positive regulation of proline catabolic process to glutamate	1	1	0	10.08	0.16
biological_process	GO:1900476	positive regulation of meiosis by positive regulation of transcription from RNA polymerase II promoter	1	1	0	10.08	0.16
biological_process	GO:0070200	establishment of protein localization to telomere	1	1	0	10.08	0.16
biological_process	GO:2001160	regulation of histone H3-K79 methylation	1	1	0	10.08	0.16
biological_process	GO:0030474	spindle pole body duplication	1	1	0	10.08	0.16
biological_process	GO:1900423	positive regulation of mating type switching by positive regulation of transcription from RNA polymerase II promoter	1	1	0	10.08	0.16
molecular_function	GO:0000827	inositol-1,3,4,5,6-pentakisphosphate kinase activity	1	2	0	5.04	0.16
molecular_function	GO:0003917	DNA topoisomerase type I activity	1	2	0	5.04	0.16
molecular_function	GO:0001042	RNA polymerase I core binding	1	2	0	5.04	0.16
molecular_function	GO:0000994	RNA polymerase III core binding	1	2	0	5.04	0.16
molecular_function	GO:0001786	phosphatidylserine binding	1	2	0	5.04	0.16
molecular_function	GO:0001047	core promoter binding	1	2	0	5.04	0.16
molecular_function	GO:0001132	TBP-class protein binding RNA polymerase II transcription factor activity	1	2	0	5.04	0.16
molecular_function	GO:0005083	small GTPase regulator activity	1	2	0	5.04	0.16
molecular_function	GO:0004396	hexokinase activity	1	2	0	5.04	0.16
molecular_function	GO:0008276	protein methyltransferase activity	1	2	0	5.04	0.16
molecular_function	GO:0000156	two-component response regulator activity	1	2	0	5.04	0.16
molecular_function	GO:0019912	cyclin-dependent protein kinase activating kinase activity	1	2	0	5.04	0.16
molecular_function	GO:0004113	2',3'-cyclic-nucleotide 3'-phosphodiesterase activity	1	2	0	5.04	0.16
molecular_function	GO:0032794	GTPase activating protein binding	1	2	0	5.04	0.16
molecular_function	GO:0000822	inositol hexakisphosphate binding	1	2	0	5.04	0.16
molecular_function	GO:0019211	phosphatase activator activity	1	2	0	5.04	0.16
molecular_function	GO:0043539	protein serine/threonine kinase activator activity	1	2	0	5.04	0.16
molecular_function	GO:0000406	double-strand/single-strand DNA junction binding	1	2	0	5.04	0.16
molecular_function	GO:0032138	single base insertion or deletion binding	1	2	0	5.04	0.16
cellular_component	GO:0031431	Dbf4-dependent protein kinase complex	1	2	0	5.04	0.16
cellular_component	GO:0043224	nuclear SCF ubiquitin ligase complex	1	2	0	5.04	0.16
cellular_component	GO:0030678	mitochondrial ribonuclease P complex	1	2	0	5.04	0.16
cellular_component	GO:0005621	cellular bud scar	1	2	0	5.04	0.16
cellular_component	GO:0031533	mRNA cap methyltransferase complex	1	2	0	5.04	0.16
cellular_component	GO:0032302	MutSbeta complex	1	2	0	5.04	0.16
cellular_component	GO:0035657	eRF1 methyltransferase complex	1	2	0	5.04	0.16
biological_process	GO:0018364	peptidyl-glutamine methylation	1	2	0	5.04	0.16
biological_process	GO:0008360	regulation of cell shape	1	2	0	5.04	0.16
biological_process	GO:0006396	RNA processing	1	2	0	5.04	0.16
biological_process	GO:0045004	DNA replication proofreading	1	2	0	5.04	0.16
biological_process	GO:0045931	positive regulation of mitotic cell cycle	1	2	0	5.04	0.16
biological_process	GO:0061136	regulation of proteasomal protein catabolic process	1	2	0	5.04	0.16
biological_process	GO:0090297	positive regulation of mitochondrial DNA replication	1	2	0	5.04	0.16
biological_process	GO:0071590	nicotinamide riboside biosynthetic process	1	2	0	5.04	0.16
biological_process	GO:0045005	maintenance of fidelity involved in DNA-dependent DNA replication	1	2	0	5.04	0.16
biological_process	GO:0071596	ubiquitin-dependent protein catabolic process via the N-end rule pathway	1	2	0	5.04	0.16
biological_process	GO:0047484	regulation of response to osmotic stress	1	2	0	5.04	0.16
biological_process	GO:0043631	RNA polyadenylation	1	2	0	5.04	0.16
biological_process	GO:0010570	regulation of filamentous growth	1	2	0	5.04	0.16
biological_process	GO:0016571	histone methylation	1	2	0	5.04	0.16
biological_process	GO:0031452	negative regulation of heterochromatin assembly	1	2	0	5.04	0.16
biological_process	GO:0033262	regulation of DNA replication involved in S phase	1	2	0	5.04	0.16
biological_process	GO:0042538	hyperosmotic salinity response	1	2	0	5.04	0.16
biological_process	GO:0005981	regulation of glycogen catabolic process	1	2	0	5.04	0.16
biological_process	GO:0010032	meiotic chromosome condensation	1	2	0	5.04	0.16
biological_process	GO:0090372	positive regulation of glycerol transport	1	2	0	5.04	0.16
biological_process	GO:0030050	vesicle transport along actin filament	1	2	0	5.04	0.16
biological_process	GO:0034502	protein localization to chromosome	1	2	0	5.04	0.16
biological_process	GO:0043547	positive regulation of GTPase activity	1	2	0	5.04	0.16
biological_process	GO:0042148	strand invasion	1	2	0	5.04	0.16
biological_process	GO:0006119	oxidative phosphorylation	1	2	0	5.04	0.16
biological_process	GO:0010793	regulation of mRNA export from nucleus	1	2	0	5.04	0.16
biological_process	GO:0001320	age-dependent response to reactive oxygen species involved in chronological cell aging	1	2	0	5.04	0.16
biological_process	GO:0045046	protein import into peroxisome membrane	1	2	0	5.04	0.16
biological_process	GO:0000087	M phase of mitotic cell cycle	1	2	0	5.04	0.16
biological_process	GO:0000412	histone peptidyl-prolyl isomerization	1	2	0	5.04	0.16
biological_process	GO:0009826	unidimensional cell growth	1	2	0	5.04	0.16
biological_process	GO:0051604	protein maturation	1	2	0	5.04	0.16
biological_process	GO:0071469	cellular response to alkalinity	1	2	0	5.04	0.16
biological_process	GO:0071592	nicotinic acid riboside biosynthetic process	1	2	0	5.04	0.16
biological_process	GO:0032445	fructose import	1	2	0	5.04	0.16
biological_process	GO:0006000	fructose metabolic process	1	2	0	5.04	0.16
biological_process	GO:0071048	nuclear retention of unspliced pre-mRNA at the site of transcription	1	2	0	5.04	0.16
biological_process	GO:0090089	regulation of dipeptide transport	1	2	0	5.04	0.16
biological_process	GO:0070899	mitochondrial tRNA wobble uridine modification	1	2	0	5.04	0.16
biological_process	GO:0035551	protein initiator methionine removal involved in protein maturation	1	2	0	5.04	0.16
biological_process	GO:0007186	G-protein coupled receptor signaling pathway	1	2	0	5.04	0.16
biological_process	GO:0042542	response to hydrogen peroxide	1	2	0	5.04	0.16
biological_process	GO:0006404	RNA import into nucleus	1	2	0	5.04	0.16
biological_process	GO:2000679	positive regulation of transcription regulatory region DNA binding	1	2	0	5.04	0.16
biological_process	GO:0006399	tRNA metabolic process	1	2	0	5.04	0.16
biological_process	GO:0032443	regulation of ergosterol biosynthetic process	1	2	0	5.04	0.16
biological_process	GO:0001682	tRNA 5'-leader removal	1	2	0	5.04	0.16
biological_process	GO:0044419	interspecies interaction between organisms	1	2	0	5.04	0.16
biological_process	GO:0043388	positive regulation of DNA binding	1	2	0	5.04	0.16
biological_process	GO:0006297	nucleotide-excision repair, DNA gap filling	1	2	0	5.04	0.16
biological_process	GO:0042275	error-free postreplication DNA repair	1	2	0	5.04	0.16
biological_process	GO:0032956	regulation of actin cytoskeleton organization	1	2	0	5.04	0.16
biological_process	GO:0000821	regulation of arginine metabolic process	1	2	0	5.04	0.16
biological_process	GO:0006282	regulation of DNA repair	1	2	0	5.04	0.16
biological_process	GO:0071071	regulation of phospholipid biosynthetic process	1	2	0	5.04	0.16
biological_process	GO:2000059	negative regulation of protein ubiquitination involved in ubiquitin-dependent protein catabolic process	1	2	0	5.04	0.16
biological_process	GO:0006610	ribosomal protein import into nucleus	1	2	0	5.04	0.16
biological_process	GO:0000903	regulation of cell shape during vegetative growth phase	1	2	0	5.04	0.16
biological_process	GO:0000950	branched-chain amino acid catabolic process to alcohol via Ehrlich pathway	1	2	0	5.04	0.16
biological_process	GO:0001193	maintenance of transcriptional fidelity during DNA-dependent transcription elongation from RNA polymerase II promoter	1	2	0	5.04	0.16
biological_process	GO:0033314	mitotic cell cycle DNA replication checkpoint	1	2	0	5.04	0.16
biological_process	GO:0071244	cellular response to carbon dioxide	1	2	0	5.04	0.16
biological_process	GO:0051204	protein insertion into mitochondrial membrane	1	2	0	5.04	0.16
molecular_function	GO:0000217	DNA secondary structure binding	1	3	0	3.36	0.16
molecular_function	GO:0032137	guanine/thymine mispair binding	1	3	0	3.36	0.16
molecular_function	GO:0003691	double-stranded telomeric DNA binding	1	3	0	3.36	0.16
molecular_function	GO:0003680	AT DNA binding	1	3	0	3.36	0.16
molecular_function	GO:0000403	Y-form DNA binding	1	3	0	3.36	0.16
molecular_function	GO:0004862	cAMP-dependent protein kinase inhibitor activity	1	3	0	3.36	0.16
molecular_function	GO:0004518	nuclease activity	1	3	0	3.36	0.16
molecular_function	GO:0004713	protein tyrosine kinase activity	1	3	0	3.36	0.16
molecular_function	GO:0019003	GDP binding	1	3	0	3.36	0.16
molecular_function	GO:0010314	phosphatidylinositol-5-phosphate binding	1	3	0	3.36	0.16
molecular_function	GO:0016831	carboxy-lyase activity	1	3	0	3.36	0.16
molecular_function	GO:0005527	macrolide binding	1	3	0	3.36	0.16
molecular_function	GO:0005516	calmodulin binding	1	3	0	3.36	0.16
molecular_function	GO:0051787	misfolded protein binding	1	3	0	3.36	0.16
molecular_function	GO:0000150	recombinase activity	1	3	0	3.36	0.16
molecular_function	GO:0035241	protein-arginine omega-N monomethyltransferase activity	1	3	0	3.36	0.16
molecular_function	GO:0008266	poly(U) RNA binding	1	3	0	3.36	0.16
cellular_component	GO:0005850	eukaryotic translation initiation factor 2 complex	1	3	0	3.36	0.16
cellular_component	GO:0005674	transcription factor TFIIF complex	1	3	0	3.36	0.16
cellular_component	GO:0005856	cytoskeleton	1	3	0	3.36	0.16
cellular_component	GO:0070211	Snt2C complex	1	3	0	3.36	0.16
cellular_component	GO:0000113	nucleotide-excision repair factor 4 complex	1	3	0	3.36	0.16
cellular_component	GO:0016591	DNA-directed RNA polymerase II, holoenzyme	1	3	0	3.36	0.16
cellular_component	GO:0030896	checkpoint clamp complex	1	3	0	3.36	0.16
cellular_component	GO:0030870	Mre11 complex	1	3	0	3.36	0.16
cellular_component	GO:0032301	MutSalpha complex	1	3	0	3.36	0.16
cellular_component	GO:0000346	transcription export complex	1	3	0	3.36	0.16
biological_process	GO:0042256	mature ribosome assembly	1	3	0	3.36	0.16
biological_process	GO:0031055	chromatin remodeling at centromere	1	3	0	3.36	0.16
biological_process	GO:0043065	positive regulation of apoptotic process	1	3	0	3.36	0.16
biological_process	GO:0043419	urea catabolic process	1	3	0	3.36	0.16
biological_process	GO:0043066	negative regulation of apoptotic process	1	3	0	3.36	0.16
biological_process	GO:0009749	response to glucose stimulus	1	3	0	3.36	0.16
biological_process	GO:0018105	peptidyl-serine phosphorylation	1	3	0	3.36	0.16
biological_process	GO:0090114	COPII-coated vesicle budding	1	3	0	3.36	0.16
biological_process	GO:0006997	nucleus organization	1	3	0	3.36	0.16
biological_process	GO:0006376	mRNA splice site selection	1	3	0	3.36	0.16
biological_process	GO:0018027	peptidyl-lysine dimethylation	1	3	0	3.36	0.16
biological_process	GO:0018216	peptidyl-arginine methylation	1	3	0	3.36	0.16
biological_process	GO:0006311	meiotic gene conversion	1	3	0	3.36	0.16
biological_process	GO:0016072	rRNA metabolic process	1	3	0	3.36	0.16
biological_process	GO:0044257	cellular protein catabolic process	1	3	0	3.36	0.16
biological_process	GO:0009847	spore germination	1	3	0	3.36	0.16
biological_process	GO:0043335	protein unfolding	1	3	0	3.36	0.16
biological_process	GO:0007243	intracellular protein kinase cascade	1	3	0	3.36	0.16
biological_process	GO:0006552	leucine catabolic process	1	3	0	3.36	0.16
biological_process	GO:0006013	mannose metabolic process	1	3	0	3.36	0.16
biological_process	GO:0000731	DNA synthesis involved in DNA repair	1	3	0	3.36	0.16
biological_process	GO:0046323	glucose import	1	3	0	3.36	0.16
biological_process	GO:0006609	mRNA-binding (hnRNP) protein import into nucleus	1	3	0	3.36	0.16
biological_process	GO:0033499	galactose catabolic process via UDP-galactose	1	3	0	3.36	0.16
biological_process	GO:0006875	cellular metal ion homeostasis	1	3	0	3.36	0.16
molecular_function	GO:0001179	RNA polymerase I transcription factor binding	1	4	0	2.52	0.16
molecular_function	GO:0009378	four-way junction helicase activity	1	4	0	2.52	0.16
molecular_function	GO:0008310	single-stranded DNA specific 3'-5' exodeoxyribonuclease activity	1	4	0	2.52	0.16
molecular_function	GO:0070006	metalloaminopeptidase activity	1	4	0	2.52	0.16
molecular_function	GO:0032135	DNA insertion or deletion binding	1	4	0	2.52	0.16
molecular_function	GO:0070181	SSU rRNA binding	1	4	0	2.52	0.16
molecular_function	GO:0004784	superoxide dismutase activity	1	4	0	2.52	0.16
molecular_function	GO:0005528	FK506 binding	1	4	0	2.52	0.16
cellular_component	GO:0016587	ISW1 complex	1	4	0	2.52	0.16
cellular_component	GO:0033551	monopolin complex	1	4	0	2.52	0.16
cellular_component	GO:0042406	extrinsic to endoplasmic reticulum membrane	1	4	0	2.52	0.16
cellular_component	GO:0070390	transcription export complex 2	1	4	0	2.52	0.16
biological_process	GO:0019430	removal of superoxide radicals	1	4	0	2.52	0.16
biological_process	GO:0016239	positive regulation of macroautophagy	1	4	0	2.52	0.16
biological_process	GO:0000916	actomyosin contractile ring contraction	1	4	0	2.52	0.16
biological_process	GO:0000920	cytokinetic cell separation	1	4	0	2.52	0.16
biological_process	GO:0032211	negative regulation of telomere maintenance via telomerase	1	4	0	2.52	0.16
biological_process	GO:0009410	response to xenobiotic stimulus	1	4	0	2.52	0.16
biological_process	GO:0016036	cellular response to phosphate starvation	1	4	0	2.52	0.16
biological_process	GO:0034517	ribophagy	1	4	0	2.52	0.16
biological_process	GO:0030037	actin filament reorganization involved in cell cycle	1	4	0	2.52	0.16
biological_process	GO:0006265	DNA topological change	1	4	0	2.52	0.16
biological_process	GO:0009113	purine nucleobase biosynthetic process	1	4	0	2.52	0.16
biological_process	GO:0032581	ER-dependent peroxisome organization	1	4	0	2.52	0.16
biological_process	GO:0007155	cell adhesion	1	4	0	2.52	0.16
biological_process	GO:0045141	meiotic telomere clustering	1	4	0	2.52	0.16
biological_process	GO:0000729	DNA double-strand break processing	1	4	0	2.52	0.16
biological_process	GO:0007097	nuclear migration	1	4	0	2.52	0.16
biological_process	GO:0032527	protein exit from endoplasmic reticulum	1	4	0	2.52	0.16
biological_process	GO:0035753	maintenance of DNA trinucleotide repeats	1	4	0	2.52	0.16
biological_process	GO:0005979	regulation of glycogen biosynthetic process	1	4	0	2.52	0.16
biological_process	GO:0071454	cellular response to anoxia	1	4	0	2.52	0.16
biological_process	GO:0000735	removal of nonhomologous ends	1	4	0	2.52	0.16
biological_process	GO:2000220	regulation of pseudohyphal growth	1	4	0	2.52	0.16
biological_process	GO:0007007	inner mitochondrial membrane organization	1	4	0	2.52	0.16
biological_process	GO:0030969	UFP-specific transcription factor mRNA processing involved in endoplasmic reticulum unfolded protein response	1	4	0	2.52	0.16
biological_process	GO:0001731	formation of translation preinitiation complex	1	4	0	2.52	0.16
biological_process	GO:0016070	RNA metabolic process	1	4	0	2.52	0.16
biological_process	GO:0006592	ornithine biosynthetic process	1	4	0	2.52	0.16
biological_process	GO:0018208	peptidyl-proline modification	1	4	0	2.52	0.16
molecular_function	GO:0004003	ATP-dependent DNA helicase activity	1	5	0	2.02	0.16
molecular_function	GO:0004017	adenylate kinase activity	1	5	0	2.02	0.16
molecular_function	GO:0043142	single-stranded DNA-dependent ATPase activity	1	5	0	2.02	0.16
molecular_function	GO:0008060	ARF GTPase activator activity	1	5	0	2.02	0.16
cellular_component	GO:0010008	endosome membrane	1	5	0	2.02	0.16
cellular_component	GO:0016281	eukaryotic translation initiation factor 4F complex	1	5	0	2.02	0.16
cellular_component	GO:0034044	exomer complex	1	5	0	2.02	0.16
cellular_component	GO:0033100	NuA3 histone acetyltransferase complex	1	5	0	2.02	0.16
cellular_component	GO:0005884	actin filament	1	5	0	2.02	0.16
cellular_component	GO:0005749	mitochondrial respiratory chain complex II	1	5	0	2.02	0.16
biological_process	GO:0048017	inositol lipid-mediated signaling	1	5	0	2.02	0.16
biological_process	GO:0046688	response to copper ion	1	5	0	2.02	0.16
biological_process	GO:0000161	MAPK cascade involved in osmosensory signaling pathway	1	5	0	2.02	0.16
biological_process	GO:0071033	nuclear retention of pre-mRNA at the site of transcription	1	5	0	2.02	0.16
biological_process	GO:0009051	pentose-phosphate shunt, oxidative branch	1	5	0	2.02	0.16
biological_process	GO:0009303	rRNA transcription	1	5	0	2.02	0.16
biological_process	GO:0045033	peroxisome inheritance	1	5	0	2.02	0.16
biological_process	GO:0032958	inositol phosphate biosynthetic process	1	5	0	2.02	0.16
biological_process	GO:0045719	negative regulation of glycogen biosynthetic process	1	5	0	2.02	0.16
biological_process	GO:0051382	kinetochore assembly	1	5	0	2.02	0.16
biological_process	GO:0019236	response to pheromone	1	5	0	2.02	0.16
biological_process	GO:0034389	lipid particle organization	1	5	0	2.02	0.16
biological_process	GO:0006121	mitochondrial electron transport, succinate to ubiquinone	1	5	0	2.02	0.16
biological_process	GO:0030007	cellular potassium ion homeostasis	1	5	0	2.02	0.16
biological_process	GO:0007232	osmosensory signaling pathway via Sho1 osmosensor	1	5	0	2.02	0.16
biological_process	GO:0000917	barrier septum assembly	1	5	0	2.02	0.16
biological_process	GO:0051131	chaperone-mediated protein complex assembly	1	5	0	2.02	0.16
molecular_function	GO:0000404	loop DNA binding	1	6	0	1.68	0.16
molecular_function	GO:0003779	actin binding	1	6	0	1.68	0.16
molecular_function	GO:0008177	succinate dehydrogenase (ubiquinone) activity	1	6	0	1.68	0.16
molecular_function	GO:0042124	1,3-beta-glucanosyltransferase activity	1	6	0	1.68	0.16
molecular_function	GO:0004177	aminopeptidase activity	1	6	0	1.68	0.16
molecular_function	GO:0004520	endodeoxyribonuclease activity	1	6	0	1.68	0.16
molecular_function	GO:0008408	3'-5' exonuclease activity	1	6	0	1.68	0.16
molecular_function	GO:0030627	pre-mRNA 5'-splice site binding	1	6	0	1.68	0.16
cellular_component	GO:0000799	nuclear condensin complex	1	6	0	1.68	0.16
cellular_component	GO:0044614	nuclear pore cytoplasmic filaments	1	6	0	1.68	0.16
cellular_component	GO:0032592	integral to mitochondrial membrane	1	6	0	1.68	0.16
cellular_component	GO:0000151	ubiquitin ligase complex	1	6	0	1.68	0.16
biological_process	GO:0007231	osmosensory signaling pathway	1	6	0	1.68	0.16
biological_process	GO:0006458	de novo' protein folding	1	6	0	1.68	0.16
biological_process	GO:0007088	regulation of mitosis	1	6	0	1.68	0.16
biological_process	GO:0007119	budding cell isotropic bud growth	1	6	0	1.68	0.16
biological_process	GO:0000706	meiotic DNA double-strand break processing	1	6	0	1.68	0.16
biological_process	GO:0000256	allantoin catabolic process	1	6	0	1.68	0.16
biological_process	GO:0006986	response to unfolded protein	1	6	0	1.68	0.16
biological_process	GO:0001100	negative regulation of exit from mitosis	1	6	0	1.68	0.16
biological_process	GO:0051598	meiotic recombination checkpoint	1	6	0	1.68	0.16
biological_process	GO:0010038	response to metal ion	1	6	0	1.68	0.16
biological_process	GO:0070898	RNA polymerase III transcriptional preinitiation complex assembly	1	6	0	1.68	0.16
biological_process	GO:0006995	cellular response to nitrogen starvation	1	6	0	1.68	0.16
biological_process	GO:0016233	telomere capping	1	6	0	1.68	0.16
biological_process	GO:0043007	maintenance of rDNA	1	6	0	1.68	0.16
biological_process	GO:0006813	potassium ion transport	1	6	0	1.68	0.16
biological_process	GO:0045807	positive regulation of endocytosis	1	6	0	1.68	0.16
biological_process	GO:0032979	protein insertion into mitochondrial membrane from inner side	1	6	0	1.68	0.16
cellular_component	GO:0031234	extrinsic to internal side of plasma membrane	1	7	0	1.44	0.16
cellular_component	GO:0032432	actin filament bundle	1	7	0	1.44	0.16
cellular_component	GO:0034657	GID complex	1	7	0	1.44	0.16
biological_process	GO:0016559	peroxisome fission	1	7	0	1.44	0.16
biological_process	GO:0070058	tRNA gene clustering	1	7	0	1.44	0.16
biological_process	GO:0006796	phosphate-containing compound metabolic process	1	7	0	1.44	0.16
biological_process	GO:0006740	NADPH regeneration	1	7	0	1.44	0.16
biological_process	GO:0007089	traversing start control point of mitotic cell cycle	1	7	0	1.44	0.16
biological_process	GO:0033108	mitochondrial respiratory chain complex assembly	1	7	0	1.44	0.16
biological_process	GO:0010696	positive regulation of spindle pole body separation	1	7	0	1.44	0.16
biological_process	GO:0009267	cellular response to starvation	1	7	0	1.44	0.16
biological_process	GO:0034613	cellular protein localization	1	7	0	1.44	0.16
biological_process	GO:0046580	negative regulation of Ras protein signal transduction	1	7	0	1.44	0.16
biological_process	GO:0000096	sulfur amino acid metabolic process	1	7	0	1.44	0.16
biological_process	GO:0046854	phosphatidylinositol phosphorylation	1	7	0	1.44	0.16
biological_process	GO:0046352	disaccharide catabolic process	1	7	0	1.44	0.16
biological_process	GO:0045041	protein import into mitochondrial intermembrane space	1	7	0	1.44	0.16
biological_process	GO:0000266	mitochondrial fission	1	7	0	1.44	0.16
molecular_function	GO:0005509	calcium ion binding	1	8	0	1.26	0.16
molecular_function	GO:0008234	cysteine-type peptidase activity	1	8	0	1.26	0.16
molecular_function	GO:0003676	nucleic acid binding	1	8	0	1.26	0.16
molecular_function	GO:0004721	phosphoprotein phosphatase activity	1	8	0	1.26	0.16
molecular_function	GO:0016279	protein-lysine N-methyltransferase activity	1	8	0	1.26	0.16
cellular_component	GO:0005637	nuclear inner membrane	1	8	0	1.26	0.16
cellular_component	GO:0030127	COPII vesicle coat	1	8	0	1.26	0.16
cellular_component	GO:0035859	Seh1-associated complex	1	8	0	1.26	0.16
biological_process	GO:0006817	phosphate ion transport	1	8	0	1.26	0.16
biological_process	GO:0010526	negative regulation of transposition, RNA-mediated	1	8	0	1.26	0.16
biological_process	GO:0001101	response to acid	1	8	0	1.26	0.16
biological_process	GO:0045132	meiotic chromosome segregation	1	8	0	1.26	0.16
biological_process	GO:0009306	protein secretion	1	8	0	1.26	0.16
biological_process	GO:0045143	homologous chromosome segregation	1	8	0	1.26	0.16
biological_process	GO:0000105	histidine biosynthetic process	1	8	0	1.26	0.16
molecular_function	GO:0031625	ubiquitin protein ligase binding	1	9	0	1.12	0.16
cellular_component	GO:0030427	site of polarized growth	1	9	0	1.12	0.16
cellular_component	GO:0000235	astral microtubule	1	9	0	1.12	0.16
cellular_component	GO:0030688	preribosome, small subunit precursor	1	9	0	1.12	0.16
cellular_component	GO:0005740	mitochondrial envelope	1	9	0	1.12	0.16
biological_process	GO:0045721	negative regulation of gluconeogenesis	1	9	0	1.12	0.16
biological_process	GO:0006283	transcription-coupled nucleotide-excision repair	1	9	0	1.12	0.16
biological_process	GO:0006268	DNA unwinding involved in replication	1	9	0	1.12	0.16
biological_process	GO:0006914	autophagy	1	9	0	1.12	0.16
biological_process	GO:0070987	error-free translesion synthesis	1	9	0	1.12	0.16
biological_process	GO:0045333	cellular respiration	1	9	0	1.12	0.16
molecular_function	GO:0005096	GTPase activator activity	1	10	0	1.01	0.16
molecular_function	GO:0004725	protein tyrosine phosphatase activity	1	10	0	1.01	0.16
molecular_function	GO:0019843	rRNA binding	1	10	0	1.01	0.16
cellular_component	GO:0005681	spliceosomal complex	1	10	0	1.01	0.16
biological_process	GO:0030847	termination of RNA polymerase II transcription, exosome-dependent	1	10	0	1.01	0.16
biological_process	GO:0046777	protein autophosphorylation	1	10	0	1.01	0.16
biological_process	GO:0033615	mitochondrial proton-transporting ATP synthase complex assembly	1	10	0	1.01	0.16
biological_process	GO:0016237	microautophagy	1	10	0	1.01	0.16
biological_process	GO:0000372	Group I intron splicing	1	10	0	1.01	0.16
biological_process	GO:0006526	arginine biosynthetic process	1	10	0	1.01	0.16
biological_process	GO:0006882	cellular zinc ion homeostasis	1	10	0	1.01	0.16
biological_process	GO:0015992	proton transport	1	10	0	1.01	0.16
biological_process	GO:0008104	protein localization	1	10	0	1.01	0.16
molecular_function	GO:0080025	phosphatidylinositol-3,5-bisphosphate binding	1	11	0	0.92	0.16
molecular_function	GO:0008186	RNA-dependent ATPase activity	1	11	0	0.92	0.16
molecular_function	GO:0004386	helicase activity	1	11	0	0.92	0.16
biological_process	GO:0045053	protein retention in Golgi apparatus	1	11	0	0.92	0.16
biological_process	GO:0048309	endoplasmic reticulum inheritance	1	11	0	0.92	0.16
biological_process	GO:0007109	cytokinesis, completion of separation	1	11	0	0.92	0.16
biological_process	GO:0000056	ribosomal small subunit export from nucleus	1	11	0	0.92	0.16
molecular_function	GO:0004526	ribonuclease P activity	1	12	0	0.84	0.16
cellular_component	GO:0000243	commitment complex	1	12	0	0.84	0.16
biological_process	GO:0000132	establishment of mitotic spindle orientation	1	12	0	0.84	0.16
biological_process	GO:0006273	lagging strand elongation	1	12	0	0.84	0.16
biological_process	GO:0000032	cell wall mannoprotein biosynthetic process	1	12	0	0.84	0.16
molecular_function	GO:0004519	endonuclease activity	1	13	0	0.78	0.16
cellular_component	GO:0000502	proteasome complex	1	13	0	0.78	0.16
cellular_component	GO:0000142	cellular bud neck contractile ring	1	13	0	0.78	0.16
biological_process	GO:0000725	recombinational repair	1	13	0	0.78	0.16
biological_process	GO:0006312	mitotic recombination	1	13	0	0.78	0.16
biological_process	GO:0032511	late endosome to vacuole transport via multivesicular body sorting pathway	1	13	0	0.78	0.16
biological_process	GO:0007266	Rho protein signal transduction	1	13	0	0.78	0.16
biological_process	GO:0007033	vacuole organization	1	13	0	0.78	0.16
biological_process	GO:0034087	establishment of mitotic sister chromatid cohesion	1	14	0	0.72	0.15
biological_process	GO:0007004	telomere maintenance via telomerase	1	14	0	0.72	0.15
biological_process	GO:0000956	nuclear-transcribed mRNA catabolic process	1	14	0	0.72	0.15
cellular_component	GO:0000780	condensed nuclear chromosome, centromeric region	1	15	0	0.67	0.15
biological_process	GO:0006612	protein targeting to membrane	1	15	0	0.67	0.15
biological_process	GO:0007103	spindle pole body duplication associated with nuclear envelope	1	15	0	0.67	0.15
biological_process	GO:0000742	karyogamy involved in conjugation with cellular fusion	1	15	0	0.67	0.15
biological_process	GO:0016485	protein processing	1	15	0	0.67	0.15
molecular_function	GO:0001075	RNA polymerase II core promoter sequence-specific DNA binding transcription factor activity involved in preinitiation complex assembly	1	16	0	0.63	0.15
biological_process	GO:0042797	tRNA transcription from RNA polymerase III promoter	1	16	0	0.63	0.15
biological_process	GO:0006099	tricarboxylic acid cycle	1	16	0	0.63	0.15
biological_process	GO:0006096	glycolysis	1	16	0	0.63	0.15
biological_process	GO:0009228	thiamine biosynthetic process	1	16	0	0.63	0.15
molecular_function	GO:0032947	protein complex scaffold	1	17	0	0.59	0.15
cellular_component	GO:0005778	peroxisomal membrane	1	17	0	0.59	0.15
cellular_component	GO:0042175	nuclear outer membrane-endoplasmic reticulum membrane network	1	17	0	0.59	0.15
biological_process	GO:0042790	transcription of nuclear large rRNA transcript from RNA polymerase I promoter	1	17	0	0.59	0.15
biological_process	GO:0070478	nuclear-transcribed mRNA catabolic process, 3'-5' exonucleolytic nonsense-mediated decay	1	17	0	0.59	0.15
biological_process	GO:0031146	SCF-dependent proteasomal ubiquitin-dependent protein catabolic process	1	18	0	0.56	0.15
biological_process	GO:0000467	exonucleolytic trimming to generate mature 3'-end of 5.8S rRNA from tricistronic rRNA transcript (SSU-rRNA, 5.8S rRNA, LSU-rRNA)	1	18	0	0.56	0.15
cellular_component	GO:0019005	SCF ubiquitin ligase complex	1	19	0	0.53	0.15
biological_process	GO:0000722	telomere maintenance via recombination	1	19	0	0.53	0.15
cellular_component	GO:0045121	membrane raft	1	20	0	0.5	0.15
cellular_component	GO:0030134	ER to Golgi transport vesicle	1	22	0	0.46	0.15
biological_process	GO:0042254	ribosome biogenesis	1	22	0	0.46	0.15
biological_process	GO:0030242	peroxisome degradation	1	22	0	0.46	0.15
biological_process	GO:0030472	mitotic spindle organization in nucleus	1	22	0	0.46	0.15
cellular_component	GO:0000407	pre-autophagosomal structure	1	24	0	0.42	0.15
molecular_function	GO:0032266	phosphatidylinositol-3-phosphate binding	1	25	0	0.4	0.15
cellular_component	GO:0042645	mitochondrial nucleoid	1	25	0	0.4	0.15
biological_process	GO:0006893	Golgi to plasma membrane transport	1	25	0	0.4	0.15
biological_process	GO:0006461	protein complex assembly	1	25	0	0.4	0.15
cellular_component	GO:0034515	proteasome storage granule	1	26	0	0.39	0.15
cellular_component	GO:0071004	U2-type prespliceosome	1	28	0	0.36	0.15
biological_process	GO:0000001	mitochondrion inheritance	1	28	0	0.36	0.15
biological_process	GO:0042144	vacuole fusion, non-autophagic	1	30	0	0.34	0.15
cellular_component	GO:0005622	intracellular	1	31	0	0.33	0.15
biological_process	GO:0006879	cellular iron ion homeostasis	1	31	0	0.33	0.15
biological_process	GO:0000480	endonucleolytic cleavage in 5'-ETS of tricistronic rRNA transcript (SSU-rRNA, 5.8S rRNA, LSU-rRNA)	1	31	0	0.33	0.15
biological_process	GO:0000472	endonucleolytic cleavage to generate mature 5'-end of SSU-rRNA from (SSU-rRNA, 5.8S rRNA, LSU-rRNA)	1	34	0	0.3	0.15
biological_process	GO:0042273	ribosomal large subunit biogenesis	1	35	0	0.29	0.15
molecular_function	GO:0005200	structural constituent of cytoskeleton	1	38	0	0.27	0.15
cellular_component	GO:0005777	peroxisome	1	38	0	0.27	0.15
biological_process	GO:0032258	CVT pathway	1	38	0	0.27	0.15
biological_process	GO:0006887	exocytosis	1	38	0	0.27	0.15
biological_process	GO:0000447	endonucleolytic cleavage in ITS1 to separate SSU-rRNA from 5.8S rRNA and LSU-rRNA from tricistronic rRNA transcript (SSU-rRNA, 5.8S rRNA, LSU-rRNA)	1	45	0	0.22	0.15
biological_process	GO:0007131	reciprocal meiotic recombination	1	48	0	0.21	0.15
biological_process	GO:0016192	vesicle-mediated transport	1	47	0	0.21	0.15
cellular_component	GO:0005758	mitochondrial intermembrane space	1	56	0	0.18	0.15
cellular_component	GO:0005794	Golgi apparatus	1	76	0	0.13	0.14
cellular_component	GO:0005741	mitochondrial outer membrane	1	82	0	0.12	0.14
cellular_component	GO:0005789	endoplasmic reticulum membrane	1	81	0	0.12	0.14

## Sheet: UniProt
Namespace	GO_ID	GO_Name	Together	TermCount	SubjectCount	Score(PR)	Score(S%)
cellular_component	GO:0005634	nucleus	2176	6934	53	5.19	22.32
biological_process	GO:0006355	regulation of transcription, DNA-dependent	1046	1046	53	16.53	20.96
biological_process	GO:0045893	positive regulation of transcription, DNA-dependent	1033	1033	53	16.53	20.7
molecular_function	GO:0003700	sequence-specific DNA binding transcription factor activity	1035	1142	53	14.98	20.31
biological_process	GO:0045944	positive regulation of transcription from RNA polymerase II promoter	904	904	53	16.53	18.12
biological_process	GO:0045892	negative regulation of transcription, DNA-dependent	857	857	53	16.53	17.17
cellular_component	GO:0005737	cytoplasm	1267	6369	53	3.29	12.55
molecular_function	GO:0005515	protein binding	1331	7000	53	3.14	12.49
biological_process	GO:0000122	negative regulation of transcription from RNA polymerase II promoter	602	602	53	16.53	12.06
molecular_function	GO:0003677	DNA binding	540	893	53	10	10.11
cellular_component	GO:0005654	nucleoplasm	468	1255	53	6.16	8.1
biological_process	GO:0043066	negative regulation of apoptotic process	369	688	53	8.87	6.95
cellular_component	GO:0005829	cytosol	544	3778	53	2.38	6.61
biological_process	GO:0006357	regulation of transcription from RNA polymerase II promoter	326	326	53	16.53	6.53
cellular_component	GO:0005730	nucleolus	466	2746	53	2.81	6.41
molecular_function	GO:0008134	transcription factor binding	311	398	53	12.92	6.13
molecular_function	GO:0043565	sequence-specific DNA binding	307	368	53	13.79	6.08
cellular_component	GO:0005667	transcription factor complex	280	294	53	15.74	5.6
molecular_function	GO:0003713	transcription coactivator activity	269	333	53	13.35	5.32
molecular_function	GO:0044212	transcription regulatory region DNA binding	265	279	53	15.7	5.3
cellular_component	GO:0005615	extracellular space	286	1102	53	4.29	4.93
biological_process	GO:0010628	positive regulation of gene expression	231	231	53	16.53	4.63
biological_process	GO:0008284	positive regulation of cell proliferation	237	462	53	8.48	4.54
biological_process	GO:0008285	negative regulation of cell proliferation	222	459	53	7.99	4.25
biological_process	GO:0010467	gene expression	220	663	53	5.48	4.05
cellular_component	GO:0005886	plasma membrane	405	5448	53	1.23	4.04
molecular_function	GO:0003682	chromatin binding	203	333	53	10.08	3.96
biological_process	GO:0006366	transcription from RNA polymerase II promoter	199	380	53	8.66	3.85
molecular_function	GO:0042803	protein homodimerization activity	222	1180	53	3.11	3.73
biological_process	GO:0006468	protein phosphorylation	189	532	53	5.87	3.54
molecular_function	GO:0003705	RNA polymerase II distal enhancer sequence-specific DNA binding transcription factor activity	171	174	53	16.24	3.42
molecular_function	GO:0003690	double-stranded DNA binding	163	234	53	11.51	3.22
biological_process	GO:0007165	signal transduction	185	958	53	3.19	3.21
molecular_function	GO:0003714	transcription corepressor activity	158	199	53	13.12	3.14
biological_process	GO:0051092	positive regulation of NF-kappaB transcription factor activity	156	156	53	16.53	3.13
biological_process	GO:0051090	regulation of sequence-specific DNA binding transcription factor activity	145	145	53	16.53	2.91
biological_process	GO:0006367	transcription initiation from RNA polymerase II promoter	145	201	53	11.92	2.87
biological_process	GO:0043065	positive regulation of apoptotic process	146	266	53	9.07	2.86
biological_process	GO:0050821	protein stabilization	139	139	53	16.53	2.79
molecular_function	GO:0008301	DNA binding, bending	139	170	53	13.52	2.77
cellular_component	GO:0048471	perinuclear region of cytoplasm	147	592	53	4.1	2.7
biological_process	GO:0006351	transcription, DNA-dependent	134	170	53	13.03	2.67
biological_process	GO:0009790	embryo development	135	248	53	9	2.65
biological_process	GO:0006446	regulation of translational initiation	125	125	53	16.53	2.51
biological_process	GO:0030308	negative regulation of cell growth	128	260	53	8.14	2.5
molecular_function	GO:0042802	identical protein binding	134	504	53	4.39	2.5
molecular_function	GO:0008270	zinc ion binding	137	658	53	3.44	2.49
biological_process	GO:0007389	pattern specification process	123	127	53	16.01	2.46
biological_process	GO:0006917	induction of apoptosis	124	279	53	7.35	2.41
cellular_component	GO:0043234	protein complex	122	263	53	7.67	2.38
molecular_function	GO:0046982	protein heterodimerization activity	123	294	53	6.92	2.38
molecular_function	GO:0003723	RNA binding	123	415	53	4.9	2.33
cellular_component	GO:0009986	cell surface	127	587	53	3.58	2.33
cellular_component	GO:0005576	extracellular region	157	2335	53	1.11	2.19
biological_process	GO:0051091	positive regulation of sequence-specific DNA binding transcription factor activity	108	108	53	16.53	2.16
biological_process	GO:0035690	cellular response to drug	113	407	53	4.59	2.14
biological_process	GO:0007283	spermatogenesis	109	290	53	6.21	2.11
molecular_function	GO:0019901	protein kinase binding	106	276	53	6.35	2.05
biological_process	GO:0008283	cell proliferation	107	365	53	4.85	2.04
cellular_component	GO:0000790	nuclear chromatin	101	125	53	13.36	2.01
biological_process	GO:0045766	positive regulation of angiogenesis	102	195	53	8.65	2.01
biological_process	GO:0045087	innate immune response	107	458	53	3.86	2
biological_process	GO:0001934	positive regulation of protein phosphorylation	99	145	53	11.29	1.97
cellular_component	GO:0005794	Golgi apparatus	112	830	53	2.23	1.96
biological_process	GO:0010629	negative regulation of gene expression	97	97	53	16.53	1.94
biological_process	GO:0060070	canonical Wnt receptor signaling pathway	97	166	53	9.66	1.92
cellular_component	GO:0005783	endoplasmic reticulum	110	899	53	2.02	1.9
biological_process	GO:0032088	negative regulation of NF-kappaB transcription factor activity	94	94	53	16.53	1.88
biological_process	GO:0006338	chromatin remodeling	94	129	53	12.04	1.87
biological_process	GO:0030335	positive regulation of cell migration	95	188	53	8.35	1.87
biological_process	GO:0043123	positive regulation of I-kappaB kinase/NF-kappaB cascade	94	185	53	8.4	1.85
biological_process	GO:0006954	inflammatory response	95	267	53	5.88	1.84
biological_process	GO:0001822	kidney development	92	129	53	11.79	1.83
biological_process	GO:0030509	BMP signaling pathway	89	89	53	16.53	1.78
molecular_function	GO:0004674	protein serine/threonine kinase activity	93	348	53	4.42	1.77
biological_process	GO:0007179	transforming growth factor beta receptor signaling pathway	87	135	53	10.65	1.73
molecular_function	GO:0004672	protein kinase activity	90	291	53	5.11	1.73
biological_process	GO:0006915	apoptotic process	92	443	53	3.43	1.72
biological_process	GO:0006974	response to DNA damage stimulus	89	289	53	5.09	1.71
biological_process	GO:0001666	response to hypoxia	85	208	53	6.75	1.66
molecular_function	GO:0019899	enzyme binding	84	241	53	5.76	1.63
cellular_component	GO:0005622	intracellular	85	331	53	4.24	1.62
molecular_function	GO:0005509	calcium ion binding	85	384	53	3.66	1.61
biological_process	GO:0043433	negative regulation of sequence-specific DNA binding transcription factor activity	80	80	53	16.53	1.6
biological_process	GO:0043280	positive regulation of cysteine-type endopeptidase activity involved in apoptotic process	80	91	53	14.53	1.6
biological_process	GO:0007507	heart development	80	140	53	9.45	1.58
molecular_function	GO:0003743	translation initiation factor activity	80	172	53	7.69	1.57
biological_process	GO:0042981	regulation of apoptotic process	80	202	53	6.55	1.56
biological_process	GO:0007267	cell-cell signaling	79	258	53	5.06	1.53
cellular_component	GO:0005887	integral to plasma membrane	95	1324	53	1.19	1.53
cellular_component	GO:0005739	mitochondrion	99	1662	53	0.98	1.51
biological_process	GO:0007050	cell cycle arrest	76	148	53	8.49	1.5
molecular_function	GO:0004842	ubiquitin-protein ligase activity	81	508	53	2.64	1.5
biological_process	GO:0007596	blood coagulation	80	446	53	2.96	1.49
biological_process	GO:0017148	negative regulation of translation	74	74	53	16.53	1.48
molecular_function	GO:0031625	ubiquitin protein ligase binding	75	154	53	8.05	1.48
biological_process	GO:0009888	tissue development	73	75	53	16.09	1.46
biological_process	GO:0071456	cellular response to hypoxia	73	103	53	11.72	1.45
molecular_function	GO:0042393	histone binding	73	107	53	11.28	1.45
biological_process	GO:0007219	Notch signaling pathway	72	114	53	10.44	1.43
molecular_function	GO:0070888	E-box binding	71	78	53	15.05	1.42
biological_process	GO:0000165	MAPK cascade	72	136	53	8.75	1.42
biological_process	GO:0007275	multicellular organismal development	73	221	53	5.46	1.42
molecular_function	GO:0005102	receptor binding	74	293	53	4.17	1.42
biological_process	GO:0042593	glucose homeostasis	69	105	53	10.86	1.37
biological_process	GO:0070374	positive regulation of ERK1 and ERK2 cascade	69	152	53	7.5	1.36
molecular_function	GO:0001077	RNA polymerase II core promoter proximal region sequence-specific DNA binding transcription factor activity involved in positive regulation of transcription	67	68	53	16.29	1.34
biological_process	GO:0030521	androgen receptor signaling pathway	67	76	53	14.57	1.34
biological_process	GO:0001525	angiogenesis	67	170	53	6.51	1.32
biological_process	GO:0007420	brain development	66	193	53	5.65	1.29
biological_process	GO:0034587	piRNA metabolic process	64	69	53	15.33	1.28
biological_process	GO:0001649	osteoblast differentiation	64	74	53	14.3	1.28
biological_process	GO:0045786	negative regulation of cell cycle	64	91	53	11.63	1.28
cellular_component	GO:0005813	centrosome	70	561	53	2.06	1.28
molecular_function	GO:0003729	mRNA binding	64	107	53	9.89	1.27
biological_process	GO:0090090	negative regulation of canonical Wnt receptor signaling pathway	64	125	53	8.46	1.27
biological_process	GO:0043046	DNA methylation involved in gamete generation	63	63	53	16.53	1.26
biological_process	GO:0006461	protein complex assembly	64	149	53	7.1	1.26
biological_process	GO:0006281	DNA repair	66	325	53	3.36	1.26
biological_process	GO:0030336	negative regulation of cell migration	63	141	53	7.39	1.24
molecular_function	GO:0005524	ATP binding	67	525	53	2.11	1.23
biological_process	GO:0001837	epithelial to mesenchymal transition	61	68	53	14.83	1.22
biological_process	GO:0048661	positive regulation of smooth muscle cell proliferation	61	81	53	12.45	1.22
biological_process	GO:0048011	nerve growth factor receptor signaling pathway	63	220	53	4.73	1.22
molecular_function	GO:0019904	protein domain specific binding	61	111	53	9.08	1.21
molecular_function	GO:0030374	ligand-dependent nuclear receptor transcription coactivator activity	60	64	53	15.5	1.2
biological_process	GO:0043491	protein kinase B signaling cascade	60	81	53	12.24	1.2
biological_process	GO:0030447	filamentous growth	64	397	53	2.66	1.2
biological_process	GO:0043154	negative regulation of cysteine-type endopeptidase activity involved in apoptotic process	60	131	53	7.57	1.19
biological_process	GO:0007399	nervous system development	62	266	53	3.85	1.19
biological_process	GO:0019221	cytokine-mediated signaling pathway	62	295	53	3.47	1.19
biological_process	GO:0006919	activation of cysteine-type endopeptidase activity involved in apoptotic process	60	141	53	7.03	1.18
biological_process	GO:0050729	positive regulation of inflammatory response	59	95	53	10.27	1.17
cellular_component	GO:0005852	eukaryotic translation initiation factor 3 complex	59	120	53	8.13	1.17
biological_process	GO:0030513	positive regulation of BMP signaling pathway	58	58	53	16.53	1.16
biological_process	GO:0009952	anterior/posterior pattern specification	57	88	53	10.71	1.14
biological_process	GO:0016525	negative regulation of angiogenesis	57	102	53	9.24	1.13
biological_process	GO:0016567	protein ubiquitination	59	281	53	3.47	1.13
molecular_function	GO:0008017	microtubule binding	58	235	53	4.08	1.12
biological_process	GO:0050679	positive regulation of epithelial cell proliferation	56	93	53	9.95	1.11
biological_process	GO:0034142	toll-like receptor 4 signaling pathway	56	98	53	9.45	1.11
biological_process	GO:0006508	proteolysis	59	371	53	2.63	1.11
biological_process	GO:0033138	positive regulation of peptidyl-serine phosphorylation	55	66	53	13.77	1.1
biological_process	GO:0008063	Toll signaling pathway	55	82	53	11.09	1.1
biological_process	GO:0016032	viral reproduction	60	518	53	1.91	1.1
biological_process	GO:0002224	toll-like receptor signaling pathway	55	94	53	9.67	1.09
biological_process	GO:0000082	G1/S transition of mitotic cell cycle	56	181	53	5.11	1.09
biological_process	GO:0045665	negative regulation of neuron differentiation	54	59	53	15.13	1.08
biological_process	GO:0002755	MyD88-dependent toll-like receptor signaling pathway	54	91	53	9.81	1.07
molecular_function	GO:0008013	beta-catenin binding	54	91	53	9.81	1.07
biological_process	GO:0051216	cartilage development	54	99	53	9.02	1.07
biological_process	GO:0001938	positive regulation of endothelial cell proliferation	54	125	53	7.14	1.07
biological_process	GO:0000278	mitotic cell cycle	56	321	53	2.88	1.07
biological_process	GO:0044281	small molecule metabolic process	67	1322	53	0.84	1.07
biological_process	GO:0010468	regulation of gene expression	53	53	53	16.53	1.06
cellular_component	GO:0017053	transcriptional repressor complex	53	59	53	14.85	1.06
biological_process	GO:0060021	palate development	53	64	53	13.69	1.06
biological_process	GO:0048146	positive regulation of fibroblast proliferation	53	75	53	11.68	1.06
cellular_component	GO:0030529	ribonucleoprotein complex	54	147	53	6.07	1.06
molecular_function	GO:0004221	ubiquitin thiolesterase activity	53	127	53	6.9	1.05
biological_process	GO:0045669	positive regulation of osteoblast differentiation	52	60	53	14.33	1.04
biological_process	GO:0001658	branching involved in ureteric bud morphogenesis	52	63	53	13.64	1.04
biological_process	GO:0034134	toll-like receptor 2 signaling pathway	52	86	53	9.99	1.04
cellular_component	GO:0016020	membrane	61	941	53	1.07	1.04
biological_process	GO:0043524	negative regulation of neuron apoptotic process	52	120	53	7.16	1.03
molecular_function	GO:0001078	RNA polymerase II core promoter proximal region sequence-specific DNA binding transcription factor activity involved in negative regulation of transcription	51	51	53	16.53	1.02
biological_process	GO:0048485	sympathetic nervous system development	51	53	53	15.91	1.02
molecular_function	GO:0001047	core promoter binding	51	53	53	15.91	1.02
molecular_function	GO:0046332	SMAD binding	51	65	53	12.97	1.02
biological_process	GO:0034138	toll-like receptor 3 signaling pathway	51	82	53	10.28	1.02
cellular_component	GO:0016607	nuclear speck	51	102	53	8.26	1.01
biological_process	GO:0008380	RNA splicing	52	201	53	4.28	1.01
biological_process	GO:0045727	positive regulation of translation	50	50	53	16.53	1
biological_process	GO:0034130	toll-like receptor 1 signaling pathway	50	70	53	11.81	1
biological_process	GO:0050680	negative regulation of epithelial cell proliferation	50	70	53	11.81	1
biological_process	GO:0097193	intrinsic apoptotic signaling pathway	50	73	53	11.32	1
molecular_function	GO:0008201	heparin binding	51	152	53	5.55	1
molecular_function	GO:0008022	protein C-terminus binding	51	159	53	5.3	1
molecular_function	GO:0004871	signal transducer activity	53	381	53	2.3	1
biological_process	GO:0010862	positive regulation of pathway-restricted SMAD protein phosphorylation	49	56	53	14.46	0.98
biological_process	GO:0035666	TRIF-dependent toll-like receptor signaling pathway	49	67	53	12.09	0.98
biological_process	GO:0008543	fibroblast growth factor receptor signaling pathway	50	143	53	5.78	0.98
biological_process	GO:0007173	epidermal growth factor receptor signaling pathway	49	143	53	5.66	0.96
molecular_function	GO:0005125	cytokine activity	48	91	53	8.72	0.95
biological_process	GO:0030168	platelet activation	49	237	53	3.42	0.95
biological_process	GO:0046777	protein autophosphorylation	49	237	53	3.42	0.95
biological_process	GO:0007155	cell adhesion	50	297	53	2.78	0.95
biological_process	GO:0030501	positive regulation of bone mineralization	47	54	53	14.39	0.94
biological_process	GO:0002756	MyD88-independent toll-like receptor signaling pathway	47	63	53	12.33	0.94
biological_process	GO:0008360	regulation of cell shape	48	144	53	5.51	0.94
biological_process	GO:0009267	cellular response to starvation	49	250	53	3.24	0.94
molecular_function	GO:0008083	growth factor activity	47	105	53	7.4	0.93
biological_process	GO:0051897	positive regulation of protein kinase B signaling cascade	47	107	53	7.26	0.93
cellular_component	GO:0043231	intracellular membrane-bounded organelle	52	661	53	1.3	0.93
molecular_function	GO:0004879	ligand-activated sequence-specific DNA binding RNA polymerase II transcription factor activity	46	51	53	14.91	0.92
molecular_function	GO:0004872	receptor activity	48	292	53	2.72	0.92
biological_process	GO:0009653	anatomical structure morphogenesis	46	111	53	6.85	0.91
molecular_function	GO:0004843	ubiquitin-specific protease activity	46	138	53	5.51	0.91
molecular_function	GO:0000981	sequence-specific DNA binding RNA polymerase II transcription factor activity	45	45	53	16.53	0.9
biological_process	GO:0001947	heart looping	45	53	53	14.03	0.9
molecular_function	GO:0046966	thyroid hormone receptor binding	45	53	53	14.03	0.9
molecular_function	GO:0042826	histone deacetylase binding	45	62	53	12	0.9
biological_process	GO:0008584	male gonad development	45	66	53	11.27	0.9
biological_process	GO:0032869	cellular response to insulin stimulus	45	87	53	8.55	0.89
molecular_function	GO:0043027	cysteine-type endopeptidase inhibitor activity involved in apoptotic process	45	89	53	8.36	0.89
molecular_function	GO:0050681	androgen receptor binding	44	47	53	15.47	0.88
biological_process	GO:0032720	negative regulation of tumor necrosis factor production	44	55	53	13.22	0.88
biological_process	GO:0048010	vascular endothelial growth factor receptor signaling pathway	44	56	53	12.99	0.88
molecular_function	GO:0002039	p53 binding	44	65	53	11.19	0.88
biological_process	GO:0043525	positive regulation of neuron apoptotic process	44	67	53	10.86	0.88
biological_process	GO:0016070	RNA metabolic process	46	257	53	2.96	0.88
biological_process	GO:0006469	negative regulation of protein kinase activity	44	85	53	8.56	0.87
biological_process	GO:0007411	axon guidance	46	328	53	2.32	0.87
cellular_component	GO:0071546	pi-body	43	49	53	14.51	0.86
biological_process	GO:0010811	positive regulation of cell-substrate adhesion	43	50	53	14.22	0.86
molecular_function	GO:0042056	chemoattractant activity	43	56	53	12.69	0.86
biological_process	GO:0006511	ubiquitin-dependent protein catabolic process	44	145	53	5.02	0.86
biological_process	GO:0006950	response to stress	44	148	53	4.91	0.86
biological_process	GO:0007417	central nervous system development	43	114	53	6.23	0.85
biological_process	GO:0016071	mRNA metabolic process	44	227	53	3.2	0.85
molecular_function	GO:0001071	nucleic acid binding transcription factor activity	42	42	53	16.53	0.84
biological_process	GO:0043922	negative regulation by host of viral transcription	42	43	53	16.15	0.84
biological_process	GO:0043124	negative regulation of I-kappaB kinase/NF-kappaB cascade	42	50	53	13.88	0.84
biological_process	GO:0030522	intracellular receptor mediated signaling pathway	42	54	53	12.86	0.84
biological_process	GO:0002062	chondrocyte differentiation	42	56	53	12.4	0.84
biological_process	GO:0009615	response to virus	43	163	53	4.36	0.84
biological_process	GO:0001501	skeletal system development	42	107	53	6.49	0.83
molecular_function	GO:0005085	guanyl-nucleotide exchange factor activity	42	139	53	4.99	0.83
biological_process	GO:0000398	mRNA splicing, via spliceosome	43	205	53	3.47	0.83
biological_process	GO:0006417	regulation of translation	41	41	53	16.53	0.82
biological_process	GO:0001657	ureteric bud development	41	44	53	15.4	0.82
molecular_function	GO:0046983	protein dimerization activity	42	176	53	3.94	0.82
cellular_component	GO:0016021	integral to membrane	49	1034	53	0.78	0.82
cellular_component	GO:0005911	cell-cell junction	41	126	53	5.38	0.81
biological_process	GO:0000381	regulation of alternative mRNA splicing, via spliceosome	40	40	53	16.53	0.8
biological_process	GO:0090190	positive regulation of branching involved in ureteric bud morphogenesis	40	43	53	15.38	0.8
biological_process	GO:2001022	positive regulation of response to DNA damage stimulus	40	47	53	14.07	0.8
biological_process	GO:0007140	male meiosis	40	51	53	12.96	0.8
cellular_component	GO:0005851	eukaryotic translation initiation factor 2B complex	40	53	53	12.48	0.8
biological_process	GO:0051403	stress-activated MAPK cascade	40	56	53	11.81	0.8
biological_process	GO:0016055	Wnt receptor signaling pathway	40	62	53	10.66	0.8
biological_process	GO:0010634	positive regulation of epithelial cell migration	40	64	53	10.33	0.8
biological_process	GO:0009953	dorsal/ventral pattern formation	40	76	53	8.7	0.8
biological_process	GO:0051260	protein homooligomerization	41	178	53	3.81	0.8
biological_process	GO:0009405	pathogenesis	45	675	53	1.1	0.8
biological_process	GO:0050728	negative regulation of inflammatory response	40	93	53	7.11	0.79
biological_process	GO:0000187	activation of MAPK activity	40	120	53	5.51	0.79
cellular_component	GO:0016592	mediator complex	39	46	53	14.01	0.78
biological_process	GO:0045599	negative regulation of fat cell differentiation	39	48	53	13.43	0.78
cellular_component	GO:0016605	PML body	39	85	53	7.58	0.77
molecular_function	GO:0047485	protein N-terminus binding	39	85	53	7.58	0.77
biological_process	GO:0030307	positive regulation of cell growth	39	92	53	7.01	0.77
biological_process	GO:0001937	negative regulation of endothelial cell proliferation	39	105	53	6.14	0.77
biological_process	GO:0036180	filamentous growth of a population of unicellular organisms in response to biotic stimulus	40	238	53	2.78	0.77
cellular_component	GO:0031012	extracellular matrix	40	241	53	2.74	0.77
cellular_component	GO:0015630	microtubule cytoskeleton	40	257	53	2.57	0.77
molecular_function	GO:0000983	RNA polymerase II core promoter sequence-specific DNA binding transcription factor activity	38	38	53	16.53	0.76
molecular_function	GO:0001105	RNA polymerase II transcription coactivator activity	38	38	53	16.53	0.76
molecular_function	GO:0001104	RNA polymerase II transcription cofactor activity	38	40	53	15.7	0.76
biological_process	GO:0045931	positive regulation of mitotic cell cycle	38	50	53	12.56	0.76
biological_process	GO:0048793	pronephros development	38	55	53	11.42	0.76
biological_process	GO:0050918	positive chemotaxis	38	56	53	11.22	0.76
biological_process	GO:0030177	positive regulation of Wnt receptor signaling pathway	38	63	53	9.97	0.76
biological_process	GO:0000086	G2/M transition of mitotic cell cycle	39	166	53	3.88	0.76
cellular_component	GO:0005764	lysosome	40	306	53	2.16	0.76
cellular_component	GO:0000785	chromatin	38	123	53	5.11	0.75
molecular_function	GO:0008144	drug binding	38	139	53	4.52	0.75
biological_process	GO:0030514	negative regulation of BMP signaling pathway	37	37	53	16.53	0.74
biological_process	GO:0043484	regulation of RNA splicing	37	37	53	16.53	0.74
biological_process	GO:0010332	response to gamma radiation	37	44	53	13.9	0.74
biological_process	GO:0014068	positive regulation of phosphatidylinositol 3-kinase cascade	37	80	53	7.64	0.74
biological_process	GO:0006413	translational initiation	38	199	53	3.16	0.74
biological_process	GO:0006955	immune response	39	401	53	1.61	0.73
biological_process	GO:0045666	positive regulation of neuron differentiation	36	52	53	11.44	0.72
biological_process	GO:0030855	epithelial cell differentiation	36	54	53	11.02	0.72
biological_process	GO:0030097	hemopoiesis	36	58	53	10.26	0.72
molecular_function	GO:0046523	S-methyl-5-thioribose-1-phosphate isomerase activity	36	58	53	10.26	0.72
biological_process	GO:0010595	positive regulation of endothelial cell migration	36	60	53	9.92	0.72
biological_process	GO:0019509	L-methionine salvage from methylthioadenosine	36	68	53	8.75	0.72
biological_process	GO:0045860	positive regulation of protein kinase activity	36	68	53	8.75	0.72
biological_process	GO:0050852	T cell receptor signaling pathway	36	110	53	5.41	0.71
cellular_component	GO:0005789	endoplasmic reticulum membrane	39	556	53	1.16	0.71
biological_process	GO:0002053	positive regulation of mesenchymal cell proliferation	35	37	53	15.64	0.7
molecular_function	GO:0030331	estrogen receptor binding	35	46	53	12.58	0.7
biological_process	GO:0030512	negative regulation of transforming growth factor beta receptor signaling pathway	35	54	53	10.71	0.7
biological_process	GO:0043406	positive regulation of MAP kinase activity	35	67	53	8.63	0.7
biological_process	GO:0018105	peptidyl-serine phosphorylation	35	68	53	8.51	0.7
biological_process	GO:0006368	transcription elongation from RNA polymerase II promoter	35	69	53	8.38	0.7
biological_process	GO:0008286	insulin receptor signaling pathway	36	163	53	3.65	0.7
biological_process	GO:0006412	translation	37	363	53	1.68	0.7
biological_process	GO:0050731	positive regulation of peptidyl-tyrosine phosphorylation	35	88	53	6.57	0.69
biological_process	GO:0042127	regulation of cell proliferation	35	89	53	6.5	0.69
biological_process	GO:0043410	positive regulation of MAPK cascade	35	95	53	6.09	0.69
cellular_component	GO:0005901	caveola	35	108	53	5.36	0.69
cellular_component	GO:0000124	SAGA complex	34	35	53	16.06	0.68
biological_process	GO:0045787	positive regulation of cell cycle	34	43	53	13.07	0.68
biological_process	GO:0050921	positive regulation of chemotaxis	34	54	53	10.41	0.68
biological_process	GO:0033554	cellular response to stress	34	70	53	8.03	0.68
cellular_component	GO:0030141	secretory granule	34	76	53	7.39	0.68
biological_process	GO:0035556	intracellular signal transduction	35	162	53	3.57	0.68
biological_process	GO:0006979	response to oxidative stress	35	169	53	3.42	0.68
biological_process	GO:0007186	G-protein coupled receptor signaling pathway	36	359	53	1.66	0.68
molecular_function	GO:0032403	protein complex binding	34	90	53	6.24	0.67
biological_process	GO:0044182	filamentous growth of a population of unicellular organisms	34	141	53	3.99	0.67
cellular_component	GO:0045121	membrane raft	35	244	53	2.37	0.67
biological_process	GO:0044267	cellular protein metabolic process	36	392	53	1.52	0.67
biological_process	GO:0060389	pathway-restricted SMAD protein phosphorylation	33	35	53	15.58	0.66
biological_process	GO:0007259	JAK-STAT cascade	33	49	53	11.13	0.66
biological_process	GO:0002092	positive regulation of receptor internalization	33	50	53	10.91	0.66
biological_process	GO:0001755	neural crest cell migration	33	51	53	10.7	0.66
biological_process	GO:0071347	cellular response to interleukin-1	33	69	53	7.91	0.66
molecular_function	GO:0008233	peptidase activity	34	157	53	3.58	0.66
biological_process	GO:0000184	nuclear-transcribed mRNA catabolic process, nonsense-mediated decay	34	162	53	3.47	0.66
biological_process	GO:0071216	cellular response to biotic stimulus	34	222	53	2.53	0.66
biological_process	GO:0044011	single-species biofilm formation on inanimate substrate	33	91	53	5.99	0.65
biological_process	GO:0006302	double-strand break repair	33	152	53	3.59	0.65
biological_process	GO:0045947	negative regulation of translational initiation	32	32	53	16.53	0.64
biological_process	GO:0048762	mesenchymal cell differentiation	32	33	53	16.03	0.64
biological_process	GO:0043536	positive regulation of blood vessel endothelial cell migration	32	37	53	14.3	0.64
biological_process	GO:0000060	protein import into nucleus, translocation	32	48	53	11.02	0.64
cellular_component	GO:0010494	cytoplasmic stress granule	32	55	53	9.62	0.64
biological_process	GO:0000902	cell morphogenesis	32	76	53	6.96	0.64
biological_process	GO:0030182	neuron differentiation	32	81	53	6.53	0.64
cellular_component	GO:0030018	Z disc	32	101	53	5.24	0.63
biological_process	GO:0000075	cell cycle checkpoint	32	140	53	3.78	0.63
biological_process	GO:0060333	interferon-gamma-mediated signaling pathway	32	141	53	3.75	0.63
biological_process	GO:0031647	regulation of protein stability	31	31	53	16.53	0.62
biological_process	GO:0030902	hindbrain development	31	34	53	15.07	0.62
biological_process	GO:0032715	negative regulation of interleukin-6 production	31	36	53	14.23	0.62
biological_process	GO:0030949	positive regulation of vascular endothelial growth factor receptor signaling pathway	31	37	53	13.85	0.62
biological_process	GO:0048513	organ development	31	37	53	13.85	0.62
biological_process	GO:0090103	cochlea morphogenesis	31	37	53	13.85	0.62
biological_process	GO:0001707	mesoderm formation	31	43	53	11.92	0.62
biological_process	GO:0060395	SMAD protein signal transduction	31	43	53	11.92	0.62
biological_process	GO:0071222	cellular response to lipopolysaccharide	31	44	53	11.65	0.62
biological_process	GO:0070371	ERK1 and ERK2 cascade	31	47	53	10.9	0.62
biological_process	GO:0001570	vasculogenesis	31	48	53	10.68	0.62
biological_process	GO:0071260	cellular response to mechanical stimulus	31	69	53	7.43	0.62
molecular_function	GO:0030246	carbohydrate binding	31	84	53	6.1	0.61
biological_process	GO:0006816	calcium ion transport	31	120	53	4.27	0.61
biological_process	GO:0016337	cell-cell adhesion	31	127	53	4.03	0.61
biological_process	GO:0002740	negative regulation of cytokine secretion involved in immune response	30	30	53	16.53	0.6
molecular_function	GO:0001106	RNA polymerase II transcription corepressor activity	30	31	53	16	0.6
biological_process	GO:2000573	positive regulation of DNA biosynthetic process	30	33	53	15.03	0.6
biological_process	GO:0032967	positive regulation of collagen biosynthetic process	30	34	53	14.58	0.6
biological_process	GO:0060317	cardiac epithelial to mesenchymal transition	30	34	53	14.58	0.6
biological_process	GO:0009880	embryonic pattern specification	30	35	53	14.17	0.6
biological_process	GO:0045671	negative regulation of osteoclast differentiation	30	35	53	14.17	0.6
biological_process	GO:0001933	negative regulation of protein phosphorylation	30	36	53	13.77	0.6
biological_process	GO:0071364	cellular response to epidermal growth factor stimulus	30	37	53	13.4	0.6
biological_process	GO:0007519	skeletal muscle tissue development	30	41	53	12.09	0.6
biological_process	GO:0007422	peripheral nervous system development	30	42	53	11.81	0.6
biological_process	GO:0032526	response to retinoic acid	30	43	53	11.53	0.6
biological_process	GO:0042771	intrinsic apoptotic signaling pathway in response to DNA damage by p53 class mediator	30	44	53	11.27	0.6
molecular_function	GO:0003712	transcription cofactor activity	30	54	53	9.18	0.6
biological_process	GO:0001541	ovarian follicle development	30	56	53	8.86	0.6
molecular_function	GO:0043130	ubiquitin binding	30	62	53	8	0.6
biological_process	GO:0048015	phosphatidylinositol-mediated signaling	30	76	53	6.52	0.6
biological_process	GO:0042493	response to drug	31	220	53	2.33	0.6
biological_process	GO:0051726	regulation of cell cycle	30	100	53	4.96	0.59
cellular_component	GO:0009897	external side of plasma membrane	30	111	53	4.47	0.59
biological_process	GO:0006879	cellular iron ion homeostasis	30	114	53	4.35	0.59
biological_process	GO:0042384	cilium assembly	30	133	53	3.73	0.59
biological_process	GO:0010718	positive regulation of epithelial to mesenchymal transition	29	30	53	15.98	0.58
biological_process	GO:0002244	hematopoietic progenitor cell differentiation	29	31	53	15.46	0.58
molecular_function	GO:0043425	bHLH transcription factor binding	29	31	53	15.46	0.58
biological_process	GO:0033137	negative regulation of peptidyl-serine phosphorylation	29	32	53	14.98	0.58
biological_process	GO:0032760	positive regulation of tumor necrosis factor production	29	36	53	13.32	0.58
biological_process	GO:0035924	cellular response to vascular endothelial growth factor stimulus	29	37	53	12.96	0.58
biological_process	GO:0048484	enteric nervous system development	29	37	53	12.96	0.58
biological_process	GO:0031018	endocrine pancreas development	29	39	53	12.29	0.58
biological_process	GO:0002040	sprouting angiogenesis	29	40	53	11.98	0.58
biological_process	GO:0045019	negative regulation of nitric oxide biosynthetic process	29	42	53	11.41	0.58
biological_process	GO:0034644	cellular response to UV	29	47	53	10.2	0.58
biological_process	GO:0050715	positive regulation of cytokine secretion	29	49	53	9.78	0.58
molecular_function	GO:0003730	mRNA 3'-UTR binding	29	50	53	9.59	0.58
biological_process	GO:0000186	activation of MAPKK activity	29	57	53	8.41	0.58
biological_process	GO:0043407	negative regulation of MAP kinase activity	29	63	53	7.61	0.58
biological_process	GO:0000209	protein polyubiquitination	29	122	53	3.93	0.57
biological_process	GO:0072162	metanephric mesenchymal cell differentiation	28	29	53	15.96	0.56
molecular_function	GO:0035035	histone acetyltransferase binding	28	29	53	15.96	0.56
molecular_function	GO:0033613	activating transcription factor binding	28	30	53	15.43	0.56
biological_process	GO:0010740	positive regulation of intracellular protein kinase cascade	28	31	53	14.93	0.56
molecular_function	GO:0000993	RNA polymerase II core binding	28	32	53	14.46	0.56
biological_process	GO:0001656	metanephros development	28	33	53	14.02	0.56
biological_process	GO:0050718	positive regulation of interleukin-1 beta secretion	28	33	53	14.02	0.56
molecular_function	GO:0042054	histone methyltransferase activity	28	33	53	14.02	0.56
cellular_component	GO:0043186	P granule	28	37	53	12.51	0.56
biological_process	GO:0046627	negative regulation of insulin receptor signaling pathway	28	38	53	12.18	0.56
biological_process	GO:0042472	inner ear morphogenesis	28	39	53	11.87	0.56
biological_process	GO:0007498	mesoderm development	28	43	53	10.76	0.56
biological_process	GO:0022008	neurogenesis	28	47	53	9.85	0.56
biological_process	GO:0000226	microtubule cytoskeleton organization	28	52	53	8.9	0.56
biological_process	GO:0030154	cell differentiation	28	60	53	7.71	0.56
molecular_function	GO:0032947	protein complex scaffold	28	70	53	6.61	0.56
biological_process	GO:0006406	mRNA export from nucleus	28	83	53	5.58	0.56
molecular_function	GO:0004197	cysteine-type endopeptidase activity	28	83	53	5.58	0.56
cellular_component	GO:0005938	cell cortex	28	94	53	4.92	0.55
biological_process	GO:0008217	regulation of blood pressure	28	100	53	4.63	0.55
molecular_function	GO:0003684	damaged DNA binding	28	117	53	3.96	0.55
biological_process	GO:0044255	cellular lipid metabolic process	28	142	53	3.26	0.55
cellular_component	GO:0030496	midbody	28	143	53	3.24	0.55
biological_process	GO:0016477	cell migration	28	159	53	2.91	0.55
biological_process	GO:0006342	chromatin silencing	27	27	53	16.53	0.54
biological_process	GO:0031047	gene silencing by RNA	27	27	53	16.53	0.54
biological_process	GO:0031053	primary miRNA processing	27	27	53	16.53	0.54
biological_process	GO:0080111	DNA demethylation	27	27	53	16.53	0.54
molecular_function	GO:0001102	RNA polymerase II activating transcription factor binding	27	27	53	16.53	0.54
biological_process	GO:0030518	intracellular steroid hormone receptor signaling pathway	27	29	53	15.39	0.54
biological_process	GO:0061036	positive regulation of cartilage development	27	29	53	15.39	0.54
biological_process	GO:0071158	positive regulation of cell cycle arrest	27	29	53	15.39	0.54
biological_process	GO:0090037	positive regulation of protein kinase C signaling cascade	27	29	53	15.39	0.54
molecular_function	GO:0051864	histone demethylase activity (H3-K36 specific)	27	29	53	15.39	0.54
biological_process	GO:0070544	histone H3-K36 demethylation	27	30	53	14.88	0.54
biological_process	GO:0003151	outflow tract morphogenesis	27	33	53	13.52	0.54
biological_process	GO:0034394	protein localization to cell surface	27	36	53	12.4	0.54
biological_process	GO:0033209	tumor necrosis factor-mediated signaling pathway	27	39	53	11.44	0.54
biological_process	GO:0045595	regulation of cell differentiation	27	39	53	11.44	0.54
biological_process	GO:0042476	odontogenesis	27	41	53	10.89	0.54
biological_process	GO:0060548	negative regulation of cell death	27	43	53	10.38	0.54
biological_process	GO:0035872	nucleotide-binding domain, leucine rich repeat containing receptor signaling pathway	27	44	53	10.14	0.54
biological_process	GO:0051928	positive regulation of calcium ion transport	27	45	53	9.92	0.54
biological_process	GO:0002548	monocyte chemotaxis	27	47	53	9.5	0.54
biological_process	GO:0071560	cellular response to transforming growth factor beta stimulus	27	47	53	9.5	0.54
biological_process	GO:0010842	retina layer formation	27	50	53	8.93	0.54
molecular_function	GO:0043498	cell surface binding	27	52	53	8.58	0.54
molecular_function	GO:0035064	methylated histone residue binding	27	68	53	6.56	0.54
biological_process	GO:0030178	negative regulation of Wnt receptor signaling pathway	27	80	53	5.58	0.54
biological_process	GO:0006260	DNA replication	28	199	53	2.33	0.54
biological_process	GO:0006874	cellular calcium ion homeostasis	27	90	53	4.96	0.53
biological_process	GO:0050796	regulation of insulin secretion	27	90	53	4.96	0.53
molecular_function	GO:0005506	iron ion binding	27	136	53	3.28	0.53
biological_process	GO:0032793	positive regulation of CREB transcription factor activity	26	26	53	16.53	0.52
biological_process	GO:0061418	regulation of transcription from RNA polymerase II promoter in response to hypoxia	26	26	53	16.53	0.52
molecular_function	GO:0000977	RNA polymerase II regulatory region sequence-specific DNA binding	26	26	53	16.53	0.52
biological_process	GO:0032270	positive regulation of cellular protein metabolic process	26	27	53	15.92	0.52
biological_process	GO:1900189	positive regulation of cell adhesion involved in single-species biofilm formation	26	27	53	15.92	0.52
biological_process	GO:0018026	peptidyl-lysine monomethylation	26	29	53	14.82	0.52
molecular_function	GO:0048018	receptor agonist activity	26	29	53	14.82	0.52
biological_process	GO:0002237	response to molecule of bacterial origin	26	30	53	14.33	0.52
biological_process	GO:0070723	response to cholesterol	26	32	53	13.43	0.52
biological_process	GO:0045862	positive regulation of proteolysis	26	33	53	13.02	0.52
biological_process	GO:0030318	melanocyte differentiation	26	34	53	12.64	0.52
molecular_function	GO:0004402	histone acetyltransferase activity	26	41	53	10.48	0.52
biological_process	GO:0000080	G1 phase of mitotic cell cycle	26	43	53	9.99	0.52
biological_process	GO:0071300	cellular response to retinoic acid	26	51	53	8.43	0.52
cellular_component	GO:0031965	nuclear membrane	27	199	53	2.24	0.52
biological_process	GO:0006935	chemotaxis	27	225	53	1.98	0.52
molecular_function	GO:0016887	ATPase activity	27	243	53	1.84	0.52
cellular_component	GO:0005819	spindle	26	92	53	4.67	0.51
biological_process	GO:0051607	defense response to virus	26	96	53	4.48	0.51
biological_process	GO:0006006	glucose metabolic process	26	128	53	3.36	0.51
cellular_component	GO:0043025	neuronal cell body	26	139	53	3.09	0.51
biological_process	GO:0007166	cell surface receptor signaling pathway	26	157	53	2.74	0.51
biological_process	GO:0031648	protein destabilization	25	25	53	16.53	0.5
biological_process	GO:0045013	carbon catabolite repression of transcription	25	25	53	16.53	0.5
biological_process	GO:0045656	negative regulation of monocyte differentiation	25	25	53	16.53	0.5
biological_process	GO:0001502	cartilage condensation	25	27	53	15.31	0.5
biological_process	GO:0001894	tissue homeostasis	25	29	53	14.25	0.5
biological_process	GO:0032757	positive regulation of interleukin-8 production	25	29	53	14.25	0.5
biological_process	GO:0051782	negative regulation of cell division	25	30	53	13.77	0.5
biological_process	GO:0043122	regulation of I-kappaB kinase/NF-kappaB cascade	25	31	53	13.33	0.5
biological_process	GO:0032148	activation of protein kinase B activity	25	32	53	12.91	0.5
biological_process	GO:2000352	negative regulation of endothelial cell apoptotic process	25	33	53	12.52	0.5
cellular_component	GO:0000118	histone deacetylase complex	25	33	53	12.52	0.5
biological_process	GO:0016568	chromatin modification	25	34	53	12.15	0.5
biological_process	GO:0007368	determination of left/right symmetry	25	38	53	10.87	0.5
biological_process	GO:0051276	chromosome organization	25	38	53	10.87	0.5
biological_process	GO:0032147	activation of protein kinase activity	25	39	53	10.6	0.5
biological_process	GO:0007286	spermatid development	25	40	53	10.33	0.5
biological_process	GO:0030282	bone mineralization	25	41	53	10.08	0.5
biological_process	GO:0051894	positive regulation of focal adhesion assembly	25	43	53	9.61	0.5
molecular_function	GO:0030295	protein kinase activator activity	25	44	53	9.39	0.5
biological_process	GO:0031663	lipopolysaccharide-mediated signaling pathway	25	47	53	8.79	0.5
biological_process	GO:0008406	gonad development	25	80	53	5.17	0.5
biological_process	GO:0007409	axonogenesis	25	97	53	4.26	0.49
biological_process	GO:0006289	nucleotide-excision repair	25	142	53	2.91	0.49
biological_process	GO:0033159	negative regulation of protein import into nucleus, translocation	24	24	53	16.53	0.48
biological_process	GO:0045662	negative regulation of myoblast differentiation	24	24	53	16.53	0.48
biological_process	GO:0048255	mRNA stabilization	24	24	53	16.53	0.48
biological_process	GO:0090184	positive regulation of kidney development	24	24	53	16.53	0.48
molecular_function	GO:0036002	pre-mRNA binding	24	24	53	16.53	0.48
biological_process	GO:0032204	regulation of telomere maintenance	24	26	53	15.26	0.48
biological_process	GO:0030889	negative regulation of B cell proliferation	24	27	53	14.69	0.48
biological_process	GO:0051781	positive regulation of cell division	24	29	53	13.68	0.48
biological_process	GO:0051384	response to glucocorticoid stimulus	24	30	53	13.22	0.48
biological_process	GO:0043116	negative regulation of vascular permeability	24	31	53	12.8	0.48
biological_process	GO:2000543	positive regulation of gastrulation	24	31	53	12.8	0.48
biological_process	GO:0051402	neuron apoptotic process	24	43	53	9.23	0.48
biological_process	GO:0090263	positive regulation of canonical Wnt receptor signaling pathway	24	49	53	8.1	0.48
biological_process	GO:0072659	protein localization to plasma membrane	24	55	53	7.21	0.48
biological_process	GO:0007254	JNK cascade	24	59	53	6.72	0.48
biological_process	GO:0090200	positive regulation of release of cytochrome c from mitochondria	24	66	53	6.01	0.48
molecular_function	GO:0016301	kinase activity	24	67	53	5.92	0.48
cellular_component	GO:0000151	ubiquitin ligase complex	24	70	53	5.67	0.48
biological_process	GO:0045739	positive regulation of DNA repair	24	72	53	5.51	0.48
biological_process	GO:0045927	positive regulation of growth	24	76	53	5.22	0.48
biological_process	GO:0007517	muscle organ development	24	81	53	4.9	0.48
molecular_function	GO:0000287	magnesium ion binding	26	428	53	1	0.48
biological_process	GO:0007243	intracellular protein kinase cascade	24	101	53	3.93	0.47
molecular_function	GO:0008094	DNA-dependent ATPase activity	24	111	53	3.57	0.47
biological_process	GO:0010756	positive regulation of plasminogen activation	23	23	53	16.53	0.46
biological_process	GO:0032922	circadian regulation of gene expression	23	23	53	16.53	0.46
cellular_component	GO:0032993	protein-DNA complex	23	23	53	16.53	0.46
biological_process	GO:0032800	receptor biosynthetic process	23	24	53	15.84	0.46
biological_process	GO:0048557	embryonic digestive tract morphogenesis	23	24	53	15.84	0.46
biological_process	GO:0006978	DNA damage response, signal transduction by p53 class mediator resulting in transcription of p21 class mediator	23	25	53	15.21	0.46
cellular_component	GO:0008023	transcription elongation factor complex	23	25	53	15.21	0.46
biological_process	GO:0034720	histone H3-K4 demethylation	23	26	53	14.62	0.46
biological_process	GO:0071407	cellular response to organic cyclic compound	23	26	53	14.62	0.46
cellular_component	GO:0016604	nuclear body	23	26	53	14.62	0.46
biological_process	GO:0045648	positive regulation of erythrocyte differentiation	23	28	53	13.58	0.46
molecular_function	GO:0016706	oxidoreductase activity, acting on paired donors, with incorporation or reduction of molecular oxygen, 2-oxoglutarate as one donor, and incorporation of one atom each of oxygen into both donors	23	28	53	13.58	0.46
biological_process	GO:0032355	response to estradiol stimulus	23	29	53	13.11	0.46
biological_process	GO:0001935	endothelial cell proliferation	23	30	53	12.67	0.46
biological_process	GO:0043010	camera-type eye development	23	31	53	12.26	0.46
biological_process	GO:0043392	negative regulation of DNA binding	23	31	53	12.26	0.46
biological_process	GO:0072661	protein targeting to plasma membrane	23	32	53	11.88	0.46
biological_process	GO:0034097	response to cytokine stimulus	23	35	53	10.86	0.46
biological_process	GO:0032689	negative regulation of interferon-gamma production	23	38	53	10	0.46
biological_process	GO:0019933	cAMP-mediated signaling	23	42	53	9.05	0.46
biological_process	GO:0032436	positive regulation of proteasomal ubiquitin-dependent protein catabolic process	23	42	53	9.05	0.46
biological_process	GO:0031398	positive regulation of protein ubiquitination	23	46	53	8.26	0.46
biological_process	GO:0046330	positive regulation of JNK cascade	23	52	53	7.31	0.46
biological_process	GO:0071277	cellular response to calcium ion	23	56	53	6.79	0.46
biological_process	GO:0032496	response to lipopolysaccharide	23	57	53	6.67	0.46
molecular_function	GO:0043621	protein self-association	23	60	53	6.34	0.46
biological_process	GO:0009887	organ morphogenesis	23	63	53	6.03	0.46
biological_process	GO:0007169	transmembrane receptor protein tyrosine kinase signaling pathway	23	64	53	5.94	0.46
biological_process	GO:0030593	neutrophil chemotaxis	23	65	53	5.85	0.46
molecular_function	GO:0004722	protein serine/threonine phosphatase activity	23	106	53	3.59	0.45
biological_process	GO:0000084	S phase of mitotic cell cycle	23	132	53	2.88	0.45
biological_process	GO:0009408	response to heat	23	140	53	2.72	0.45
biological_process	GO:0007010	cytoskeleton organization	23	149	53	2.55	0.45
biological_process	GO:0036170	filamentous growth of a population of unicellular organisms in response to starvation	23	194	53	1.96	0.45
biological_process	GO:0002904	positive regulation of B cell apoptotic process	22	22	53	16.53	0.44
biological_process	GO:0010719	negative regulation of epithelial to mesenchymal transition	22	22	53	16.53	0.44
biological_process	GO:0032968	positive regulation of transcription elongation from RNA polymerase II promoter	22	22	53	16.53	0.44
biological_process	GO:0048937	lateral line nerve glial cell development	22	22	53	16.53	0.44
biological_process	GO:0060008	Sertoli cell differentiation	22	22	53	16.53	0.44
molecular_function	GO:0000976	transcription regulatory region sequence-specific DNA binding	22	22	53	16.53	0.44
molecular_function	GO:0000988	protein binding transcription factor activity	22	22	53	16.53	0.44
biological_process	GO:0001823	mesonephros development	22	23	53	15.81	0.44
biological_process	GO:0060045	positive regulation of cardiac muscle cell proliferation	22	23	53	15.81	0.44
biological_process	GO:0070986	left/right axis specification	22	23	53	15.81	0.44
biological_process	GO:0048846	axon extension involved in axon guidance	22	25	53	14.55	0.44
biological_process	GO:0051045	negative regulation of membrane protein ectodomain proteolysis	22	25	53	14.55	0.44
biological_process	GO:0070423	nucleotide-binding oligomerization domain containing signaling pathway	22	25	53	14.55	0.44
molecular_function	GO:0001085	RNA polymerase II transcription factor binding	22	25	53	14.55	0.44
biological_process	GO:0043434	response to peptide hormone stimulus	22	26	53	13.99	0.44
biological_process	GO:0002088	lens development in camera-type eye	22	27	53	13.47	0.44
biological_process	GO:0034969	histone arginine methylation	22	27	53	13.47	0.44
biological_process	GO:0048706	embryonic skeletal system development	22	29	53	12.54	0.44
cellular_component	GO:0030315	T-tubule	22	30	53	12.12	0.44
biological_process	GO:0042327	positive regulation of phosphorylation	22	31	53	11.73	0.44
biological_process	GO:0048538	thymus development	22	31	53	11.73	0.44
biological_process	GO:0051930	regulation of sensory perception of pain	22	31	53	11.73	0.44
biological_process	GO:0045214	sarcomere organization	22	32	53	11.36	0.44
biological_process	GO:0045292	mRNA cis splicing, via spliceosome	22	32	53	11.36	0.44
biological_process	GO:0007249	I-kappaB kinase/NF-kappaB cascade	22	33	53	11.02	0.44
biological_process	GO:0009950	dorsal/ventral axis specification	22	36	53	10.1	0.44
biological_process	GO:0050727	regulation of inflammatory response	22	45	53	8.08	0.44
biological_process	GO:0045840	positive regulation of mitosis	22	51	53	7.13	0.44
biological_process	GO:0030324	lung development	22	52	53	6.99	0.44
[truncated: 5,949 more rows]

## Sheet: ZFIN
Namespace	GO_ID	GO_Name	Together	TermCount	SubjectCount	Score(PR)	Score(S%)
[truncated: 1,229 more rows]
