# Supplementary material for: GOLink: Finding Cooccurring Terms across Gene Ontology Namespaces
Source: Int J Genomics. 2013 Dec 31;2013:594528. doi: 10.1155/2013/594528 (PMC3892482; doi:10.1155/2013/594528)
Supplement: Supplementary file 1 — (SupplementaryFile1.xls): GOLink terms lists generated using the query term ‘regulation of gene expression', the evidence code filter “!IEA” and database filter ‘UniProtKB'. Supplementary File 2 (SupplementaryFile2.xls): The top 50 Molecular Function terms from each GOLink terms list (a); the genes and annotation used for the positive list and the negative list (b); the raw statistical data for sensitivity, specificity, accuracy, PPV, NPV and the number and proportion of positive and negative genes found (c). These latter data correspond to Figure 3. Supplementary File 3 (SupplementaryFile3.xls): The genes and annotation used for the positive list and the negative list and raw statistical data for sensitivity, specificity, accuracy, PPV, NPV and the number and proportion of positive and negative genes found when the true positives from Supplementary Table 2 are removed (a). The raw statistical data when both the true positives and the term ‘protein binding' are removed from the GOLink terms lists (b). Supplementary File 4 (SupplementaryFile4.xls): The five GOLink all_list terms lists generated using the query term ‘regulation of gene expression' and the evidence code filter “!IEA” for each of the five annotation sources (“UniprotKB, “PomBase”, “MGI”, “SGD” and “ZFIN”) used in the creation of Figure 4. Supplementary File 5 (SupplementaryFile5.xls): a) Summary of the top 100 terms from a GOLink query_list terms list (b) and a QuickGO terms list (c) generated using the query term ‘regulation of gene expression' and the evidence code filter “!IEA”. Supplementary Figure 1 (SupplementaryFigure1.jpg): Venn diagram showing the overlap between the top 50 Molecular Function terms from each of the three GOLink terms lists as found in Supplementary File 2. Supplementary Table 1 (SupplementaryTable1.doc): The 59 GOLink consensus terms found in all three GOLink terms lists. Supplementary Table 2 (SupplementaryTable2.doc): Genes from the negative list deemed t [file 594528.f1.zip › Files/SupplementaryFile5.xls]

## Sheet: a) GOLinkVsQuickGO
Namespace	GO_ID	GO_Name	Position in QuickGO	Position in GOLink	QuickGO_Together	QuickGO_TermCount	QuickGO_Score(PR)	QuickGO_Score(S%)	GOLink_Together	GOLink_TermCount	GOLink_Score(PR)	GOLink_Score(S%)
biological_process	GO:0010468	regulation of gene expression	1	1	490	490	405.39	100	402	402	908.7	100
biological_process	GO:0030900	forebrain development	2	10	56	308	73.71	7.55	26	200	118.13	4.51
biological_process	GO:0009953	dorsal/ventral pattern formation	3	11	57	374	61.78	7.06	29	279	94.45	4.45
biological_process	GO:0001706	endoderm formation	4	12	35	92	154.23	6.4	20	77	236.03	4.36
biological_process	GO:0001764	neuron migration	5	20	53	417	51.52	6.21	26	310	76.21	3.79
biological_process	GO:0001701	in utero embryonic development	6	3	76	830	37.12	6.11	45	522	78.34	5.12
biological_process	GO:0009791	post-embryonic development	7	2	50	378	53.62	6.11	36	249	131.38	5.85
biological_process	GO:0002052	positive regulation of neuroblast proliferation	8	25	31	101	124.43	5.54	16	59	246.43	3.6
biological_process	GO:0001702	gastrulation with mouth forming second	9	33	31	124	101.35	5.32	16	101	143.95	3.29
biological_process	GO:0050767	regulation of neurogenesis	10	120	28	64	177.36	5.32	10	45	201.93	2.29
biological_process	GO:0048515	spermatid differentiation	11	531	27	45	243.24	5.31	4	22	165.22	0.95
biological_process	GO:0001822	kidney development	12	7	44	389	45.85	5.27	33	351	85.43	4.58
biological_process	GO:0030154	cell differentiation	13	64	50	516	39.28	5.23	24	458	47.62	2.87
biological_process	GO:0045165	cell fate commitment	14	22	36	234	62.37	5.23	20	148	122.8	3.77
biological_process	GO:0043010	camera-type eye development	15	42	36	236	61.84	5.22	18	188	87	3.15
biological_process	GO:0009948	anterior/posterior axis specification	16	17	29	106	110.91	5.11	18	77	212.42	3.9
biological_process	GO:0007141	male meiosis I	17	607	27	67	163.37	5.09	4	50	72.7	0.89
biological_process	GO:0009952	anterior/posterior pattern specification	18	26	47	517	36.85	4.9	28	406	62.67	3.59
biological_process	GO:0001657	ureteric bud development	19	14	30	164	74.16	4.81	20	106	171.45	4.1
biological_process	GO:0045665	negative regulation of neuron differentiation	20	29	33	232	57.66	4.79	19	178	97	3.39
biological_process	GO:0048646	anatomical structure formation involved in morphogenesis	21	4	26	84	125.48	4.74	22	57	350.73	5.03
biological_process	GO:0030324	lung development	22	6	39	385	41.07	4.67	31	304	92.66	4.59
biological_process	GO:0021983	pituitary gland development	23	85	26	108	97.59	4.55	12	59	184.82	2.67
biological_process	GO:0042127	regulation of cell proliferation	24	70	50	663	30.57	4.53	26	538	43.92	2.84
biological_process	GO:0042981	regulation of apoptotic process	25	30	43	515	33.85	4.47	29	484	54.45	3.38
biological_process	GO:0048663	neuron fate commitment	26	8	25	96	105.57	4.46	21	82	232.72	4.54
biological_process	GO:0030858	positive regulation of epithelial cell differentiation	27	261	23	53	175.92	4.42	6	27	201.93	1.42
biological_process	GO:0023019	signal transduction involved in regulation of gene expression	28	283	23	59	158.03	4.37	6	39	139.8	1.38
molecular_function	GO:0044212	transcription regulatory region DNA binding	29	13	44	574	31.08	4.31	43	682	57.29	4.13
biological_process	GO:0001709	cell fate determination	30	245	25	117	86.62	4.3	7	84	75.73	1.46
biological_process	GO:0045596	negative regulation of cell differentiation	31	9	24	93	104.62	4.29	21	83	229.91	4.53
biological_process	GO:0051039	positive regulation of transcription during meiosis	32	2311	21	34	250.39	4.17	1	13	69.9	0.24
biological_process	GO:0048538	thymus development	33	28	25	139	72.91	4.14	17	111	139.17	3.43
molecular_function	GO:0043565	sequence-specific DNA binding	34	19	78	1582	19.99	3.91	70	1490	42.69	3.84
biological_process	GO:0045944	positive regulation of transcription from RNA polymerase II promoter	35	46	141	3275	17.45	3.89	96	2796	31.2	3.09
biological_process	GO:0006352	DNA-dependent transcription, initiation	36	716	21	74	115.04	3.87	5	258	17.61	0.76
biological_process	GO:0060066	oviduct development	37	53	19	20	385.12	3.87	12	14	778.89	2.97
biological_process	GO:0001705	ectoderm formation	38	27	19	24	320.94	3.84	14	18	706.77	3.45
biological_process	GO:0001658	branching involved in ureteric bud morphogenesis	39	54	25	189	53.62	3.82	16	153	95.03	2.97
biological_process	GO:0007507	heart development	40	69	49	848	23.42	3.8	29	643	40.98	2.85
biological_process	GO:0007286	spermatid development	41	705	28	285	39.83	3.75	5	241	18.85	0.78
biological_process	GO:0009950	dorsal/ventral axis specification	42	696	23	149	62.58	3.73	4	109	33.35	0.79
biological_process	GO:0031069	hair follicle morphogenesis	43	15	21	94	90.57	3.73	18	70	233.67	3.96
biological_process	GO:0021778	oligodendrocyte cell fate specification	44	433	18	20	364.85	3.66	4	6	605.8	0.99
biological_process	GO:0021543	pallium development	45	432	18	23	317.26	3.64	4	6	605.8	0.99
biological_process	GO:0090009	primitive streak formation	46	34	19	51	151.03	3.64	14	40	318.05	3.27
molecular_function	GO:0003682	chromatin binding	47	83	65	1366	19.29	3.63	39	1084	32.69	2.7
biological_process	GO:0072001	renal system development	48	66	19	53	145.33	3.63	12	29	376.02	2.86
biological_process	GO:0007224	smoothened signaling pathway	49	147	26	256	41.17	3.61	12	214	50.96	1.99
biological_process	GO:0021549	cerebellum development	50	31	21	113	75.34	3.61	16	94	154.67	3.33
biological_process	GO:0030217	T cell differentiation	51	211	22	142	62.81	3.61	8	107	67.94	1.6
biological_process	GO:0007389	pattern specification process	52	18	36	546	26.73	3.6	30	403	67.65	3.87
biological_process	GO:0021798	forebrain dorsal/ventral pattern formation	53	467	18	28	260.61	3.6	4	11	330.44	0.98
biological_process	GO:0048505	regulation of timing of cell differentiation	54	481	18	29	251.62	3.59	4	13	279.6	0.97
biological_process	GO:0001708	cell fate specification	55	72	24	219	44.43	3.5	16	184	79.02	2.81
biological_process	GO:0007435	salivary gland morphogenesis	56	320	21	135	63.06	3.48	6	72	75.73	1.28
cellular_component	GO:0044424	intracellular part	57	604	18	46	158.63	3.47	4	45	80.77	0.9
biological_process	GO:0006325	chromatin organization	58	2068	22	179	49.82	3.4	2	122	14.9	0.38
biological_process	GO:0002088	lens development in camera-type eye	59	206	20	120	67.57	3.39	8	98	74.18	1.63
biological_process	GO:0021702	cerebellar Purkinje cell differentiation	60	35	18	66	110.56	3.35	14	41	310.29	3.26
biological_process	GO:0002053	positive regulation of mesenchymal cell proliferation	61	109	22	197	45.27	3.31	12	116	94	2.37
biological_process	GO:0021527	spinal cord association neuron differentiation	62	21	17	41	168.09	3.31	16	38	382.61	3.77
biological_process	GO:0042475	odontogenesis of dentin-containing tooth	63	36	22	197	45.27	3.31	17	137	112.76	3.26
biological_process	GO:0045893	positive regulation of transcription, DNA-dependent	64	45	99	2643	15.18	3.26	94	2704	31.59	3.12
biological_process	GO:0060429	epithelium development	65	24	17	48	143.58	3.26	16	42	346.17	3.74
biological_process	GO:0021937	cerebellar Purkinje cell-granule cell precursor cell signaling involved in regulation of granule cell precursor cell proliferation	66	55	16	18	360.35	3.25	12	15	726.96	2.96
cellular_component	GO:0005667	transcription factor complex	67	89	56	1293	17.56	3.24	33	894	33.54	2.61
biological_process	GO:0060441	epithelial tube branching involved in lung morphogenesis	68	37	17	51	135.13	3.24	14	44	289.13	3.24
biological_process	GO:0007283	spermatogenesis	69	389	47	1011	18.85	3.23	14	854	14.9	1.13
biological_process	GO:0021871	forebrain regionalization	70	58	16	22	294.83	3.23	12	19	573.92	2.93
biological_process	GO:0032331	negative regulation of chondrocyte differentiation	71	94	17	60	114.86	3.19	11	47	212.68	2.51
biological_process	GO:0050680	negative regulation of epithelial cell proliferation	72	132	20	159	50.99	3.18	12	166	65.69	2.16
biological_process	GO:0051145	smooth muscle cell differentiation	73	98	17	62	111.16	3.18	11	52	192.23	2.48
biological_process	GO:0030316	osteoclast differentiation	74	615	17	63	109.39	3.17	4	54	67.31	0.88
molecular_function	GO:0003677	DNA binding	75	231	114	3226	14.33	3.16	84	5226	14.61	1.52
biological_process	GO:0030216	keratinocyte differentiation	76	397	20	164	49.44	3.15	6	149	36.59	1.1
biological_process	GO:0031016	pancreas development	77	84	18	102	71.54	3.14	13	95	124.35	2.69
biological_process	GO:0035116	embryonic hindlimb morphogenesis	78	47	18	102	71.54	3.14	14	71	179.18	3.05
biological_process	GO:0045669	positive regulation of osteoblast differentiation	79	117	20	172	47.14	3.12	13	174	67.89	2.31
cellular_component	GO:0000790	nuclear chromatin	80	564	30	505	24.08	3.11	9	563	14.53	0.94
biological_process	GO:0045595	regulation of cell differentiation	81	93	20	173	46.87	3.11	14	161	79.02	2.55
biological_process	GO:0045670	regulation of osteoclast differentiation	82	537	16	41	158.2	3.11	4	23	158.04	0.95
biological_process	GO:0030182	neuron differentiation	83	62	25	342	29.63	3.1	20	305	59.59	2.91
biological_process	GO:0043393	regulation of protein binding	84	167	16	47	138.01	3.07	8	42	173.09	1.83
biological_process	GO:0043524	negative regulation of neuron apoptotic process	85	44	26	383	27.52	3.07	23	358	58.38	3.12
biological_process	GO:0048286	lung alveolus development	86	67	19	147	52.4	3.07	14	103	123.51	2.85
biological_process	GO:0060045	positive regulation of cardiac muscle cell proliferation	87	88	17	83	83.03	3.06	12	64	170.38	2.64
biological_process	GO:0021796	cerebral cortex regionalization	88	434	15	16	380.05	3.05	4	6	605.8	0.99
biological_process	GO:0048617	embryonic foregut morphogenesis	89	276	16	51	127.18	3.05	6	33	165.22	1.4
biological_process	GO:2000017	positive regulation of determination of dorsal identity	90	441	15	16	380.05	3.05	4	7	519.26	0.99
biological_process	GO:0009880	embryonic pattern specification	91	68	22	255	34.97	3.04	16	175	83.08	2.85
biological_process	GO:0060322	head development	92	79	16	53	122.38	3.04	12	50	218.09	2.73
biological_process	GO:0060070	canonical Wnt receptor signaling pathway	93	153	29	497	23.65	3.03	15	387	35.22	1.94
biological_process	GO:0001655	urogenital system development	94	78	16	56	115.83	3.02	12	48	227.18	2.74
biological_process	GO:0008284	positive regulation of cell proliferation	95	74	53	1320	16.28	3.02	47	1331	32.09	2.79
biological_process	GO:0009653	anatomical structure morphogenesis	96	86	20	192	42.23	3.02	15	174	78.34	2.67
biological_process	GO:0048701	embryonic cranial skeleton morphogenesis	97	99	18	125	58.38	3.02	12	94	116	2.48
biological_process	GO:0033077	T cell differentiation in thymus	98	103	18	134	54.46	2.97	12	99	110.15	2.45
biological_process	GO:0048703	embryonic viscerocranium morphogenesis	99	32	16	64	101.35	2.97	15	65	209.7	3.32
biological_process	GO:0060484	lung-associated mesenchyme development	100	267	16	64	101.35	2.97	6	28	194.72	1.42
			101	-1
			102	-1

## Sheet: b) Full_GOLink_Results
Namespace	GO_ID	GO_Name	Together	TermCount	SubjectCount	Score(PR)	Score(S%)
biological_process	GO:0010468	regulation of gene expression	402	402	402	908.7	100
biological_process	GO:0009791	post-embryonic development	36	249	402	131.38	5.85
biological_process	GO:0001701	in utero embryonic development	45	522	402	78.34	5.12
biological_process	GO:0048646	anatomical structure formation involved in morphogenesis	22	57	402	350.73	5.03
biological_process	GO:0090190	positive regulation of branching involved in ureteric bud morphogenesis	22	92	402	217.3	4.66
biological_process	GO:0030324	lung development	31	304	402	92.66	4.59
biological_process	GO:0001822	kidney development	33	351	402	85.43	4.58
biological_process	GO:0048663	neuron fate commitment	21	82	402	232.72	4.54
biological_process	GO:0045596	negative regulation of cell differentiation	21	83	402	229.91	4.53
biological_process	GO:0030900	forebrain development	26	200	402	118.13	4.51
biological_process	GO:0009953	dorsal/ventral pattern formation	29	279	402	94.45	4.45
biological_process	GO:0001706	endoderm formation	20	77	402	236.03	4.36
molecular_function	GO:0044212	transcription regulatory region DNA binding	43	682	402	57.29	4.13
biological_process	GO:0001657	ureteric bud development	20	106	402	171.45	4.1
biological_process	GO:0031069	hair follicle morphogenesis	18	70	402	233.67	3.96
biological_process	GO:0035264	multicellular organism growth	21	149	402	128.07	3.96
biological_process	GO:0009948	anterior/posterior axis specification	18	77	402	212.42	3.9
biological_process	GO:0007389	pattern specification process	30	403	402	67.65	3.87
molecular_function	GO:0043565	sequence-specific DNA binding	70	1490	402	42.69	3.84
biological_process	GO:0001764	neuron migration	26	310	402	76.21	3.79
biological_process	GO:0021527	spinal cord association neuron differentiation	16	38	402	382.61	3.77
biological_process	GO:0045165	cell fate commitment	20	148	402	122.8	3.77
biological_process	GO:0010628	positive regulation of gene expression	37	618	402	54.4	3.76
biological_process	GO:0060429	epithelium development	16	42	402	346.17	3.74
biological_process	GO:0002052	positive regulation of neuroblast proliferation	16	59	402	246.43	3.6
biological_process	GO:0009952	anterior/posterior pattern specification	28	406	402	62.67	3.59
biological_process	GO:0001705	ectoderm formation	14	18	402	706.77	3.45
biological_process	GO:0048538	thymus development	17	111	402	139.17	3.43
biological_process	GO:0045665	negative regulation of neuron differentiation	19	178	402	97	3.39
biological_process	GO:0042981	regulation of apoptotic process	29	484	402	54.45	3.38
biological_process	GO:0021549	cerebellum development	16	94	402	154.67	3.33
biological_process	GO:0048703	embryonic viscerocranium morphogenesis	15	65	402	209.7	3.32
biological_process	GO:0001702	gastrulation with mouth forming second	16	101	402	143.95	3.29
biological_process	GO:0090009	primitive streak formation	14	40	402	318.05	3.27
biological_process	GO:0021702	cerebellar Purkinje cell differentiation	14	41	402	310.29	3.26
biological_process	GO:0042475	odontogenesis of dentin-containing tooth	17	137	402	112.76	3.26
biological_process	GO:0060441	epithelial tube branching involved in lung morphogenesis	14	44	402	289.13	3.24
biological_process	GO:2000543	positive regulation of gastrulation	14	44	402	289.13	3.24
biological_process	GO:0043066	negative regulation of apoptotic process	66	1722	402	34.83	3.21
biological_process	GO:0045666	positive regulation of neuron differentiation	19	211	402	81.83	3.2
biological_process	GO:0060059	embryonic retina morphogenesis in camera-type eye	14	51	402	249.45	3.19
biological_process	GO:0043010	camera-type eye development	18	188	402	87	3.15
biological_process	GO:0040019	positive regulation of embryonic development	14	58	402	219.34	3.14
biological_process	GO:0043524	negative regulation of neuron apoptotic process	23	358	402	58.38	3.12
biological_process	GO:0045893	positive regulation of transcription, DNA-dependent	94	2704	402	31.59	3.12
biological_process	GO:0045944	positive regulation of transcription from RNA polymerase II promoter	96	2796	402	31.2	3.09
biological_process	GO:0035116	embryonic hindlimb morphogenesis	14	71	402	179.18	3.05
biological_process	GO:0030326	embryonic limb morphogenesis	16	144	402	100.97	3.02
biological_process	GO:0035019	somatic stem cell maintenance	15	115	402	118.53	2.99
biological_process	GO:0072049	comma-shaped body morphogenesis	12	13	402	838.8	2.98
biological_process	GO:0072050	S-shaped body morphogenesis	12	13	402	838.8	2.98
biological_process	GO:0072077	renal vesicle morphogenesis	12	13	402	838.8	2.98
biological_process	GO:0060066	oviduct development	12	14	402	778.89	2.97
biological_process	GO:0001658	branching involved in ureteric bud morphogenesis	16	153	402	95.03	2.97
biological_process	GO:0021937	cerebellar Purkinje cell-granule cell precursor cell signaling involved in regulation of granule cell precursor cell proliferation	12	15	402	726.96	2.96
biological_process	GO:2000744	positive regulation of anterior head development	12	15	402	726.96	2.96
biological_process	GO:0048146	positive regulation of fibroblast proliferation	16	158	402	92.02	2.94
biological_process	GO:0021871	forebrain regionalization	12	19	402	573.92	2.93
biological_process	GO:0072178	nephric duct morphogenesis	12	20	402	545.22	2.93
biological_process	GO:0061205	paramesonephric duct development	12	21	402	519.26	2.92
biological_process	GO:0019827	stem cell maintenance	15	129	402	105.66	2.91
biological_process	GO:0030182	neuron differentiation	20	305	402	59.59	2.91
biological_process	GO:2000768	positive regulation of nephron tubule epithelial cell differentiation	12	26	402	419.4	2.88
biological_process	GO:0030154	cell differentiation	24	458	402	47.62	2.87
biological_process	GO:0000122	negative regulation of transcription from RNA polymerase II promoter	65	1928	402	30.64	2.87
biological_process	GO:0072001	renal system development	12	29	402	376.02	2.86
biological_process	GO:0048286	lung alveolus development	14	103	402	123.51	2.85
biological_process	GO:0009880	embryonic pattern specification	16	175	402	83.08	2.85
biological_process	GO:0007507	heart development	29	643	402	40.98	2.85
biological_process	GO:0042127	regulation of cell proliferation	26	538	402	43.92	2.84
biological_process	GO:0021987	cerebral cortex development	14	110	402	115.65	2.81
biological_process	GO:0001708	cell fate specification	16	184	402	79.02	2.81
molecular_function	GO:0003705	RNA polymerase II distal enhancer sequence-specific DNA binding transcription factor activity	24	478	402	45.63	2.8
biological_process	GO:0008284	positive regulation of cell proliferation	47	1331	402	32.09	2.79
biological_process	GO:0021904	dorsal/ventral neural tube patterning	12	41	402	265.96	2.78
biological_process	GO:0001568	blood vessel development	16	190	402	76.52	2.78
molecular_function	GO:0001071	nucleic acid binding transcription factor activity	13	84	402	140.63	2.75
biological_process	GO:0001655	urogenital system development	12	48	402	227.18	2.74
biological_process	GO:0060322	head development	12	50	402	218.09	2.73
biological_process	GO:0032526	response to retinoic acid	15	163	402	83.62	2.73
biological_process	GO:0045664	regulation of neuron differentiation	13	89	402	132.73	2.72
biological_process	GO:0001889	liver development	17	243	402	63.57	2.71
molecular_function	GO:0003682	chromatin binding	39	1084	402	32.69	2.7
biological_process	GO:0031016	pancreas development	13	95	402	124.35	2.69
biological_process	GO:0021983	pituitary gland development	12	59	402	184.82	2.67
biological_process	GO:0009653	anatomical structure morphogenesis	15	174	402	78.34	2.67
biological_process	GO:0043410	positive regulation of MAPK cascade	17	252	402	61.3	2.67
biological_process	GO:0060045	positive regulation of cardiac muscle cell proliferation	12	64	402	170.38	2.64
cellular_component	GO:0005667	transcription factor complex	33	894	402	33.54	2.61
biological_process	GO:0001714	endodermal cell fate specification	11	32	402	312.37	2.6
molecular_function	GO:0008134	transcription factor binding	38	1101	402	31.36	2.59
biological_process	GO:0060065	uterus development	11	39	402	256.3	2.56
biological_process	GO:0045595	regulation of cell differentiation	14	161	402	79.02	2.55
biological_process	GO:0032331	negative regulation of chondrocyte differentiation	11	47	402	212.68	2.51
biological_process	GO:0010842	retina layer formation	12	88	402	123.91	2.51
biological_process	GO:0035846	oviduct epithelium development	10	10	402	908.7	2.49
biological_process	GO:0035847	uterine epithelium development	10	10	402	908.7	2.49
biological_process	GO:0051145	smooth muscle cell differentiation	11	52	402	192.23	2.48
biological_process	GO:0048701	embryonic cranial skeleton morphogenesis	12	94	402	116	2.48
biological_process	GO:0060067	cervix development	10	13	402	699	2.47
biological_process	GO:0048709	oligodendrocyte differentiation	11	55	402	181.74	2.47
biological_process	GO:0007267	cell-cell signaling	21	473	402	40.34	2.46
biological_process	GO:0033077	T cell differentiation in thymus	12	99	402	110.15	2.45
biological_process	GO:0006366	transcription from RNA polymerase II promoter	29	825	402	31.94	2.42
biological_process	GO:0048754	branching morphogenesis of a tube	12	107	402	101.91	2.41
biological_process	GO:0048839	inner ear development	13	155	402	76.21	2.39
biological_process	GO:0030501	positive regulation of bone mineralization	12	115	402	94.82	2.38
biological_process	GO:0008285	negative regulation of cell proliferation	35	1103	402	28.83	2.38
biological_process	GO:0002053	positive regulation of mesenchymal cell proliferation	12	116	402	94	2.37
biological_process	GO:0021542	dentate gyrus development	10	32	402	283.97	2.36
biological_process	GO:0060068	vagina development	10	32	402	283.97	2.36
molecular_function	GO:0008201	heparin binding	17	339	402	45.57	2.35
biological_process	GO:0048557	embryonic digestive tract morphogenesis	11	80	402	124.95	2.34
biological_process	GO:0048704	embryonic skeletal system morphogenesis	12	123	402	88.65	2.34
biological_process	GO:0032868	response to insulin stimulus	12	124	402	87.94	2.33
biological_process	GO:0030513	positive regulation of BMP signaling pathway	12	126	402	86.54	2.33
biological_process	GO:0045669	positive regulation of osteoblast differentiation	13	174	402	67.89	2.31
biological_process	GO:0007417	central nervous system development	17	355	402	43.52	2.3
biological_process	GO:0007420	brain development	24	666	402	32.75	2.3
biological_process	GO:0050767	regulation of neurogenesis	10	45	402	201.93	2.29
biological_process	GO:0030097	hemopoiesis	15	267	402	51.05	2.29
biological_process	GO:0071542	dopaminergic neuron differentiation	10	46	402	197.54	2.28
biological_process	GO:0008045	motor neuron axon guidance	12	146	402	74.69	2.24
biological_process	GO:0060173	limb development	10	56	402	162.27	2.23
biological_process	GO:0048747	muscle fiber development	10	58	402	156.67	2.22
biological_process	GO:0045668	negative regulation of osteoblast differentiation	11	105	402	95.2	2.22
molecular_function	GO:0003714	transcription corepressor activity	19	472	402	36.58	2.22
molecular_function	GO:0019899	enzyme binding	25	764	402	29.74	2.19
molecular_function	GO:0001077	RNA polymerase II core promoter proximal region sequence-specific DNA binding transcription factor activity involved in positive regulation of transcription	15	301	402	45.28	2.18
biological_process	GO:0033689	negative regulation of osteoblast proliferation	9	22	402	371.74	2.17
biological_process	GO:0003151	outflow tract morphogenesis	11	115	402	86.92	2.17
biological_process	GO:0050680	negative regulation of epithelial cell proliferation	12	166	402	65.69	2.16
biological_process	GO:0001947	heart looping	13	218	402	54.19	2.14
biological_process	GO:0097150	neuronal stem cell maintenance	9	32	402	255.57	2.12
cellular_component	GO:0043234	protein complex	35	1285	402	24.75	2.12
molecular_function	GO:0000981	sequence-specific DNA binding RNA polymerase II transcription factor activity	13	228	402	51.81	2.11
molecular_function	GO:0001540	beta-amyloid binding	10	85	402	106.91	2.1
biological_process	GO:0010629	negative regulation of gene expression	16	381	402	38.16	2.09
biological_process	GO:0060425	lung morphogenesis	9	41	402	199.47	2.07
biological_process	GO:0001501	skeletal system development	14	288	402	44.17	2.07
biological_process	GO:0034504	protein localization to nucleus	10	94	402	96.67	2.06
biological_process	GO:0045892	negative regulation of transcription, DNA-dependent	51	2140	402	21.66	2.05
biological_process	GO:0030901	midbrain development	10	105	402	86.54	2.01
biological_process	GO:0042472	inner ear morphogenesis	12	208	402	52.43	2.01
biological_process	GO:0019217	regulation of fatty acid metabolic process	9	56	402	146.04	2
biological_process	GO:0030199	collagen fibril organization	10	110	402	82.61	1.99
biological_process	GO:0007224	smoothened signaling pathway	12	214	402	50.96	1.99
biological_process	GO:0003007	heart morphogenesis	11	164	402	60.95	1.98
molecular_function	GO:0032403	protein complex binding	19	577	402	29.92	1.98
biological_process	GO:0060412	ventricular septum morphogenesis	9	67	402	122.06	1.96
biological_process	GO:0043588	skin development	10	119	402	76.36	1.96
biological_process	GO:0043065	positive regulation of apoptotic process	24	846	402	25.78	1.96
biological_process	GO:0060070	canonical Wnt receptor signaling pathway	15	387	402	35.22	1.94
biological_process	GO:0001525	angiogenesis	17	492	402	31.4	1.94
biological_process	GO:0048645	organ formation	8	20	402	363.48	1.93
biological_process	GO:0043627	response to estrogen stimulus	11	179	402	55.84	1.93
biological_process	GO:0031175	neuron projection development	13	286	402	41.3	1.93
biological_process	GO:0060740	prostate gland epithelium morphogenesis	8	23	402	316.07	1.92
biological_process	GO:0045740	positive regulation of DNA replication	10	129	402	70.44	1.92
biological_process	GO:0007626	locomotory behavior	12	236	402	46.21	1.92
biological_process	GO:0048856	anatomical structure development	8	26	402	279.6	1.9
biological_process	GO:0021915	neural tube development	9	81	402	100.97	1.9
biological_process	GO:0003214	cardiac left ventricle morphogenesis	8	30	402	242.32	1.89
biological_process	GO:0048589	developmental growth	10	136	402	66.82	1.89
biological_process	GO:0001759	organ induction	8	36	402	201.93	1.86
biological_process	GO:0001656	metanephros development	9	97	402	84.31	1.84
biological_process	GO:0043393	regulation of protein binding	8	42	402	173.09	1.83
molecular_function	GO:0001158	enhancer sequence-specific DNA binding	8	42	402	173.09	1.83
molecular_function	GO:0035198	miRNA binding	8	42	402	173.09	1.83
biological_process	GO:0032880	regulation of protein localization	11	211	402	47.37	1.83
biological_process	GO:0048568	embryonic organ development	8	46	402	158.04	1.82
biological_process	GO:0035914	skeletal muscle cell differentiation	9	101	402	80.97	1.82
biological_process	GO:0042221	response to chemical stimulus	10	158	402	57.51	1.82
biological_process	GO:0021954	central nervous system neuron development	8	47	402	154.67	1.81
biological_process	GO:0048514	blood vessel morphogenesis	9	103	402	79.4	1.81
biological_process	GO:0050679	positive regulation of epithelial cell proliferation	11	221	402	45.23	1.8
biological_process	GO:0048665	neuron fate specification	8	53	402	137.16	1.79
biological_process	GO:0048468	cell development	8	54	402	134.62	1.79
biological_process	GO:0071222	cellular response to lipopolysaccharide	11	223	402	44.82	1.79
molecular_function	GO:0005125	cytokine activity	11	225	402	44.43	1.79
biological_process	GO:0000082	G1/S transition of mitotic cell cycle	13	338	402	34.95	1.79
cellular_component	GO:0000176	nuclear exosome (RNase complex)	8	55	402	132.18	1.78
biological_process	GO:0007368	determination of left/right symmetry	11	228	402	43.84	1.78
biological_process	GO:0051216	cartilage development	12	285	402	38.26	1.78
biological_process	GO:0035108	limb morphogenesis	8	61	402	119.17	1.76
biological_process	GO:0030902	hindbrain development	9	119	402	68.73	1.76
biological_process	GO:0007519	skeletal muscle tissue development	10	176	402	51.63	1.76
biological_process	GO:2000599	negative regulation of cyclin catabolic process	7	7	402	908.7	1.74
biological_process	GO:0030183	B cell differentiation	9	124	402	65.95	1.74
biological_process	GO:0048536	spleen development	8	71	402	102.39	1.72
molecular_function	GO:0000979	RNA polymerase II core promoter sequence-specific DNA binding	8	72	402	100.97	1.72
biological_process	GO:0001837	epithelial to mesenchymal transition	9	131	402	62.43	1.72
biological_process	GO:0060021	palate development	10	193	402	47.08	1.71
biological_process	GO:0007492	endoderm development	9	135	402	60.58	1.7
molecular_function	GO:0042826	histone deacetylase binding	10	202	402	44.99	1.68
biological_process	GO:0014070	response to organic cyclic compound	11	267	402	37.44	1.67
biological_process	GO:0014902	myotube differentiation	7	26	402	244.65	1.66
biological_process	GO:0006357	regulation of transcription from RNA polymerase II promoter	26	1192	402	19.82	1.66
biological_process	GO:0003323	type B pancreatic cell development	7	29	402	219.34	1.65
biological_process	GO:0030193	regulation of blood coagulation	7	29	402	219.34	1.65
biological_process	GO:0001570	vasculogenesis	10	215	402	42.27	1.65
biological_process	GO:0001974	blood vessel remodeling	8	95	402	76.52	1.64
biological_process	GO:0048598	embryonic morphogenesis	8	95	402	76.52	1.64
biological_process	GO:0048705	skeletal system morphogenesis	8	95	402	76.52	1.64
cellular_component	GO:0030425	dendrite	19	778	402	22.19	1.64
biological_process	GO:0002088	lens development in camera-type eye	8	98	402	74.18	1.63
biological_process	GO:0007219	Notch signaling pathway	11	282	402	35.45	1.63
molecular_function	GO:0031625	ubiquitin protein ligase binding	14	469	402	27.13	1.63
molecular_function	GO:0003690	double-stranded DNA binding	18	721	402	22.69	1.63
biological_process	GO:0043473	pigmentation	8	106	402	68.58	1.6
biological_process	GO:0030217	T cell differentiation	8	107	402	67.94	1.6
biological_process	GO:0048706	embryonic skeletal system development	8	107	402	67.94	1.6
biological_process	GO:0007411	axon guidance	19	802	402	21.53	1.6
biological_process	GO:0050731	positive regulation of peptidyl-tyrosine phosphorylation	10	235	402	38.67	1.59
biological_process	GO:0090090	negative regulation of canonical Wnt receptor signaling pathway	11	302	402	33.1	1.59
biological_process	GO:0021522	spinal cord motor neuron differentiation	7	47	402	135.34	1.58
biological_process	GO:0043537	negative regulation of blood vessel endothelial cell migration	7	49	402	129.81	1.58
biological_process	GO:0008544	epidermis development	9	176	402	46.47	1.58
biological_process	GO:0010575	positive regulation vascular endothelial growth factor production	7	50	402	127.22	1.57
biological_process	GO:0048762	mesenchymal cell differentiation	7	51	402	124.72	1.57
biological_process	GO:0042733	embryonic digit morphogenesis	8	117	402	62.13	1.57
molecular_function	GO:0046982	protein heterodimerization activity	25	1212	402	18.74	1.57
biological_process	GO:0048699	generation of neurons	7	55	402	115.65	1.56
biological_process	GO:0060317	cardiac epithelial to mesenchymal transition	7	55	402	115.65	1.56
biological_process	GO:0045931	positive regulation of mitotic cell cycle	8	119	402	61.09	1.56
biological_process	GO:0006917	induction of apoptosis	16	641	402	22.68	1.56
molecular_function	GO:0008083	growth factor activity	10	255	402	35.64	1.55
biological_process	GO:0045725	positive regulation of glycogen biosynthetic process	7	64	402	99.39	1.53
molecular_function	GO:0035035	histone acetyltransferase binding	7	64	402	99.39	1.53
biological_process	GO:0042593	glucose homeostasis	10	260	402	34.95	1.53
molecular_function	GO:0003677	DNA binding	84	5226	402	14.61	1.52
biological_process	GO:0010001	glial cell differentiation	7	73	402	87.14	1.5
biological_process	GO:0032355	response to estradiol stimulus	9	206	402	39.7	1.5
biological_process	GO:0060685	regulation of prostatic bud formation	6	6	402	908.7	1.49
biological_process	GO:0060447	bud outgrowth involved in lung branching	6	8	402	681.53	1.49
biological_process	GO:0030855	epithelial cell differentiation	8	142	402	51.19	1.49
molecular_function	GO:0019904	protein domain specific binding	15	620	402	21.98	1.49
biological_process	GO:0060684	epithelial-mesenchymal cell signaling	6	10	402	545.22	1.48
biological_process	GO:0007050	cell cycle arrest	10	282	402	32.22	1.48
cellular_component	GO:0030424	axon	16	697	402	20.86	1.48
biological_process	GO:0048808	male genitalia morphogenesis	6	12	402	454.35	1.47
biological_process	GO:0014031	mesenchymal cell development	6	13	402	419.4	1.47
biological_process	GO:0008584	male gonad development	9	220	402	37.17	1.47
biological_process	GO:2001015	negative regulation of skeletal muscle cell differentiation	6	15	402	363.48	1.46
biological_process	GO:0001709	cell fate determination	7	84	402	75.73	1.46
biological_process	GO:0001755	neural crest cell migration	8	155	402	46.9	1.46
biological_process	GO:0003208	cardiac ventricle morphogenesis	6	19	402	286.96	1.45
molecular_function	GO:0000175	3'-5'-exoribonuclease activity	7	88	402	72.28	1.45
biological_process	GO:0043085	positive regulation of catalytic activity	10	298	402	30.49	1.45
biological_process	GO:0007568	aging	10	300	402	30.29	1.45
biological_process	GO:0035239	tube morphogenesis	6	21	402	259.63	1.44
biological_process	GO:0002320	lymphoid progenitor cell differentiation	6	22	402	247.83	1.44
biological_process	GO:0048565	digestive tract development	7	91	402	69.9	1.44
biological_process	GO:0043586	tongue development	6	23	402	237.05	1.43
biological_process	GO:0003222	ventricular trabecula myocardium morphogenesis	6	24	402	227.18	1.43
biological_process	GO:0060840	artery development	6	24	402	227.18	1.43
biological_process	GO:0034244	negative regulation of transcription elongation from RNA polymerase II promoter	6	25	402	218.09	1.43
biological_process	GO:0045603	positive regulation of endothelial cell differentiation	6	25	402	218.09	1.43
biological_process	GO:0055010	ventricular cardiac muscle tissue morphogenesis	7	95	402	66.96	1.43
biological_process	GO:0007409	axonogenesis	11	379	402	26.37	1.43
biological_process	GO:0030858	positive regulation of epithelial cell differentiation	6	27	402	201.93	1.42
biological_process	GO:0050678	regulation of epithelial cell proliferation	6	27	402	201.93	1.42
biological_process	GO:0060413	atrial septum morphogenesis	6	27	402	201.93	1.42
biological_process	GO:0070989	oxidative demethylation	6	27	402	201.93	1.42
biological_process	GO:0048708	astrocyte differentiation	6	28	402	194.72	1.42
biological_process	GO:0060445	branching involved in salivary gland morphogenesis	6	28	402	194.72	1.42
biological_process	GO:0060484	lung-associated mesenchyme development	6	28	402	194.72	1.42
biological_process	GO:0061298	retina vasculature development in camera-type eye	6	28	402	194.72	1.42
molecular_function	GO:0005179	hormone activity	8	171	402	42.51	1.42
biological_process	GO:0003215	cardiac right ventricle morphogenesis	6	30	402	181.74	1.41
biological_process	GO:0042307	positive regulation of protein import into nucleus	6	31	402	175.88	1.41
biological_process	GO:0060391	positive regulation of SMAD protein import into nucleus	6	31	402	175.88	1.41
biological_process	GO:0007162	negative regulation of cell adhesion	7	102	402	62.36	1.41
molecular_function	GO:0042802	identical protein binding	30	1753	402	15.55	1.41
biological_process	GO:0048715	negative regulation of oligodendrocyte differentiation	6	32	402	170.38	1.4
biological_process	GO:0048617	embryonic foregut morphogenesis	6	33	402	165.22	1.4
biological_process	GO:0030522	intracellular receptor mediated signaling pathway	7	104	402	61.16	1.4
biological_process	GO:0021953	central nervous system neuron differentiation	6	37	402	147.36	1.39
biological_process	GO:0045445	myoblast differentiation	6	37	402	147.36	1.39
biological_process	GO:0048103	somatic stem cell division	6	37	402	147.36	1.39
biological_process	GO:0010595	positive regulation of endothelial cell migration	7	107	402	59.45	1.39
biological_process	GO:0018107	peptidyl-threonine phosphorylation	7	107	402	59.45	1.39
biological_process	GO:0023019	signal transduction involved in regulation of gene expression	6	39	402	139.8	1.38
molecular_function	GO:0051428	peptide hormone receptor binding	6	39	402	139.8	1.38
biological_process	GO:0046326	positive regulation of glucose import	7	111	402	57.31	1.38
biological_process	GO:0045766	positive regulation of angiogenesis	11	411	402	24.32	1.37
biological_process	GO:0035265	organ growth	6	44	402	123.91	1.36
biological_process	GO:0002076	osteoblast development	6	45	402	121.16	1.36
biological_process	GO:0001707	mesoderm formation	7	120	402	53.01	1.36
biological_process	GO:0051384	response to glucocorticoid stimulus	8	194	402	37.47	1.36
biological_process	GO:0045662	negative regulation of myoblast differentiation	6	47	402	116	1.35
biological_process	GO:0000083	regulation of transcription involved in G1/S phase of mitotic cell cycle	6	49	402	111.27	1.35
molecular_function	GO:0001103	RNA polymerase II repressing transcription factor binding	6	50	402	109.04	1.35
biological_process	GO:0045787	positive regulation of cell cycle	7	122	402	52.14	1.35
molecular_function	GO:0004879	ligand-activated sequence-specific DNA binding RNA polymerase II transcription factor activity	7	125	402	50.89	1.35
biological_process	GO:0048566	embryonic digestive tract development	6	52	402	104.85	1.34
cellular_component	GO:0000177	cytoplasmic exosome (RNase complex)	6	52	402	104.85	1.34
biological_process	GO:0043029	T cell homeostasis	6	53	402	102.87	1.34
biological_process	GO:0048608	reproductive structure development	6	53	402	102.87	1.34
biological_process	GO:0002089	lens morphogenesis in camera-type eye	6	54	402	100.97	1.33
biological_process	GO:0045778	positive regulation of ossification	6	55	402	99.13	1.33
molecular_function	GO:0051879	Hsp90 protein binding	6	56	402	97.36	1.33
biological_process	GO:0009790	embryo development	17	891	402	17.34	1.33
biological_process	GO:0030279	negative regulation of ossification	6	57	402	95.65	1.32
biological_process	GO:0060037	pharyngeal system development	6	58	402	94	1.32
biological_process	GO:0045453	bone resorption	6	59	402	92.41	1.32
biological_process	GO:0048546	digestive tract morphogenesis	6	59	402	92.41	1.32
biological_process	GO:0042474	middle ear morphogenesis	6	61	402	89.38	1.31
biological_process	GO:0030539	male genitalia development	6	62	402	87.94	1.31
biological_process	GO:0030949	positive regulation of vascular endothelial growth factor receptor signaling pathway	6	62	402	87.94	1.31
biological_process	GO:0001958	endochondral ossification	6	63	402	86.54	1.31
biological_process	GO:0008344	adult locomotory behavior	7	141	402	45.11	1.31
cellular_component	GO:0043025	neuronal cell body	18	987	402	16.57	1.31
biological_process	GO:0048545	response to steroid hormone stimulus	6	64	402	85.19	1.3
biological_process	GO:0001502	cartilage condensation	6	66	402	82.61	1.3
biological_process	GO:0043086	negative regulation of catalytic activity	7	144	402	44.17	1.3
biological_process	GO:0001503	ossification	7	145	402	43.87	1.3
biological_process	GO:0030878	thyroid gland development	6	70	402	77.89	1.29
biological_process	GO:0060348	bone development	6	71	402	76.79	1.28
biological_process	GO:0007435	salivary gland morphogenesis	6	72	402	75.73	1.28
molecular_function	GO:0003700	sequence-specific DNA binding transcription factor activity	89	6717	402	12.04	1.27
biological_process	GO:0048863	stem cell differentiation	6	79	402	69.02	1.26
molecular_function	GO:0046332	SMAD binding	7	159	402	40.01	1.26
biological_process	GO:0045747	positive regulation of Notch signaling pathway	6	83	402	65.69	1.25
biological_process	GO:0001836	release of cytochrome c from mitochondria	6	84	402	64.91	1.25
biological_process	GO:0032091	negative regulation of protein binding	6	85	402	64.14	1.25
biological_process	GO:0045786	negative regulation of cell cycle	7	164	402	38.79	1.25
biological_process	GO:0042493	response to drug	18	1055	402	15.5	1.25
biological_process	GO:2001027	negative regulation of endothelial cell chemotaxis	5	5	402	908.7	1.24
biological_process	GO:2000504	positive regulation of blood vessel remodeling	5	7	402	649.07	1.24
molecular_function	GO:0042056	chemoattractant activity	6	88	402	61.96	1.24
biological_process	GO:1900747	negative regulation of vascular endothelial growth factor signaling pathway	5	8	402	567.94	1.23
biological_process	GO:0010593	negative regulation of lamellipodium assembly	5	9	402	504.84	1.23
biological_process	GO:0061419	positive regulation of transcription from RNA polymerase II promoter in response to hypoxia	5	10	402	454.35	1.23
biological_process	GO:0002839	positive regulation of immune response to tumor cell	5	11	402	413.05	1.23
biological_process	GO:0034097	response to cytokine stimulus	7	176	402	36.14	1.23
biological_process	GO:0030308	negative regulation of cell growth	11	501	402	19.95	1.23
biological_process	GO:0060913	cardiac cell fate determination	5	12	402	378.63	1.22
biological_process	GO:0033629	negative regulation of cell adhesion mediated by integrin	5	13	402	349.5	1.22
molecular_function	GO:0019865	immunoglobulin binding	5	13	402	349.5	1.22
biological_process	GO:0035162	embryonic hemopoiesis	6	95	402	57.39	1.22
biological_process	GO:0045597	positive regulation of cell differentiation	6	95	402	57.39	1.22
biological_process	GO:0010976	positive regulation of neuron projection development	7	177	402	35.94	1.22
biological_process	GO:0006879	cellular iron ion homeostasis	8	262	402	27.75	1.22
biological_process	GO:0010543	regulation of platelet activation	5	15	402	302.9	1.21
biological_process	GO:2000179	positive regulation of neural precursor cell proliferation	5	15	402	302.9	1.21
biological_process	GO:0060979	vasculogenesis involved in coronary vascular morphogenesis	5	16	402	283.97	1.21
molecular_function	GO:0048406	nerve growth factor binding	5	17	402	267.27	1.21
biological_process	GO:0043401	steroid hormone mediated signaling pathway	5	18	402	252.42	1.2
biological_process	GO:0010942	positive regulation of cell death	6	102	402	53.45	1.2
biological_process	GO:0030318	melanocyte differentiation	6	102	402	53.45	1.2
biological_process	GO:0050918	positive chemotaxis	6	102	402	53.45	1.2
biological_process	GO:0006959	humoral immune response	6	103	402	52.93	1.2
biological_process	GO:0001649	osteoblast differentiation	7	186	402	34.2	1.2
molecular_function	GO:0003713	transcription coactivator activity	13	696	402	16.97	1.2
biological_process	GO:0032525	somite rostral/caudal axis specification	5	22	402	206.52	1.19
biological_process	GO:0043254	regulation of protein complex assembly	5	23	402	197.54	1.19
biological_process	GO:0003130	BMP signaling pathway involved in heart induction	5	24	402	189.31	1.19
molecular_function	GO:0030331	estrogen receptor binding	6	110	402	49.57	1.19
biological_process	GO:0007605	sensory perception of sound	9	365	402	22.41	1.19
biological_process	GO:0030890	positive regulation of B cell proliferation	6	111	402	49.12	1.18
biological_process	GO:0001569	patterning of blood vessels	6	112	402	48.68	1.18
biological_process	GO:0008542	visual learning	6	112	402	48.68	1.18
cellular_component	GO:0015030	Cajal body	6	113	402	48.25	1.18
biological_process	GO:0031103	axon regeneration	5	29	402	156.67	1.17
biological_process	GO:0002904	positive regulation of B cell apoptotic process	5	30	402	151.45	1.17
biological_process	GO:0031641	regulation of myelination	5	30	402	151.45	1.17
molecular_function	GO:0043395	heparan sulfate proteoglycan binding	5	31	402	146.57	1.17
biological_process	GO:0016055	Wnt receptor signaling pathway	8	289	402	25.15	1.17
biological_process	GO:0006338	chromatin remodeling	10	464	402	19.58	1.17
biological_process	GO:0002062	chondrocyte differentiation	6	120	402	45.44	1.16
biological_process	GO:0030819	positive regulation of cAMP biosynthetic process	6	123	402	44.33	1.16
biological_process	GO:0016485	protein processing	7	208	402	30.58	1.16
biological_process	GO:0010033	response to organic substance	7	210	402	30.29	1.16
biological_process	GO:0043433	negative regulation of sequence-specific DNA binding transcription factor activity	7	211	402	30.15	1.16
biological_process	GO:0008283	cell proliferation	16	998	402	14.57	1.16
biological_process	GO:0021984	adenohypophysis development	5	36	402	126.21	1.15
biological_process	GO:0031076	embryonic camera-type eye development	5	39	402	116.5	1.15
biological_process	GO:0070848	response to growth factor stimulus	5	39	402	116.5	1.15
biological_process	GO:0001654	eye development	6	128	402	42.6	1.15
biological_process	GO:0050730	regulation of peptidyl-tyrosine phosphorylation	5	41	402	110.82	1.14
molecular_function	GO:0050431	transforming growth factor beta binding	5	43	402	105.66	1.14
molecular_function	GO:0019901	protein kinase binding	15	927	402	14.7	1.14
biological_process	GO:0030177	positive regulation of Wnt receptor signaling pathway	6	133	402	40.99	1.13
biological_process	GO:0060548	negative regulation of cell death	6	133	402	40.99	1.13
biological_process	GO:0030218	erythrocyte differentiation	6	135	402	40.39	1.13
biological_process	GO:0045471	response to ethanol	7	227	402	28.02	1.13
biological_process	GO:0001666	response to hypoxia	13	764	402	15.46	1.13
biological_process	GO:0007283	spermatogenesis	14	854	402	14.9	1.13
cellular_component	GO:0043204	perikaryon	6	139	402	39.22	1.12
biological_process	GO:0001938	positive regulation of endothelial cell proliferation	7	231	402	27.54	1.12
biological_process	GO:0030889	negative regulation of B cell proliferation	5	55	402	82.61	1.11
biological_process	GO:0016358	dendrite development	6	144	402	37.86	1.11
biological_process	GO:0070482	response to oxygen levels	5	56	402	81.13	1.1
biological_process	GO:0048873	homeostasis of number of cells within a tissue	5	57	402	79.71	1.1
biological_process	GO:0001541	ovarian follicle development	6	149	402	36.59	1.1
biological_process	GO:0030216	keratinocyte differentiation	6	149	402	36.59	1.1
biological_process	GO:0042060	wound healing	7	243	402	26.18	1.1
molecular_function	GO:0070412	R-SMAD binding	5	60	402	75.73	1.09
biological_process	GO:0001824	blastocyst development	5	61	402	74.48	1.09
molecular_function	GO:0016922	ligand-dependent nuclear receptor binding	5	62	402	73.28	1.09
biological_process	GO:0051894	positive regulation of focal adhesion assembly	5	63	402	72.12	1.09
biological_process	GO:0001944	vasculature development	6	157	402	34.73	1.08
biological_process	GO:0014068	positive regulation of phosphatidylinositol 3-kinase cascade	6	159	402	34.29	1.08
cellular_component	GO:0017053	transcriptional repressor complex	6	162	402	33.66	1.08
biological_process	GO:0030335	positive regulation of cell migration	9	442	402	18.5	1.08
cellular_component	GO:0000307	cyclin-dependent protein kinase holoenzyme complex	5	69	402	65.85	1.07
biological_process	GO:0071310	cellular response to organic substance	5	70	402	64.91	1.07
biological_process	GO:0021537	telencephalon development	5	71	402	63.99	1.07
cellular_component	GO:0043005	neuron projection	11	641	402	15.59	1.07
cellular_component	GO:0048471	perinuclear region of cytoplasm	20	1481	402	12.27	1.07
biological_process	GO:0050769	positive regulation of neurogenesis	5	80	402	56.79	1.05
biological_process	GO:0051091	positive regulation of sequence-specific DNA binding transcription factor activity	7	270	402	23.56	1.05
biological_process	GO:0006915	apoptotic process	19	1421	402	12.15	1.05
molecular_function	GO:0031490	chromatin DNA binding	5	85	402	53.45	1.04
biological_process	GO:0046716	muscle cell homeostasis	5	87	402	52.22	1.03
molecular_function	GO:0043498	cell surface binding	5	88	402	51.63	1.03
molecular_function	GO:0047485	protein N-terminus binding	7	284	402	22.4	1.03
biological_process	GO:0040018	positive regulation of multicellular organism growth	9	484	402	16.9	1.03
biological_process	GO:0006417	regulation of translation	6	195	402	27.96	1.02
biological_process	GO:0050728	negative regulation of inflammatory response	6	199	402	27.4	1.01
biological_process	GO:0009611	response to wounding	9	498	402	16.42	1.01
biological_process	GO:0006355	regulation of transcription, DNA-dependent	73	6907	402	9.6	1.01
biological_process	GO:0060768	regulation of epithelial cell proliferation involved in prostate gland development	4	4	402	908.7	1
biological_process	GO:0070384	Harderian gland development	4	4	402	908.7	1
biological_process	GO:2001260	regulation of semaphorin-plexin signaling pathway	4	4	402	908.7	1
biological_process	GO:0010634	positive regulation of epithelial cell migration	5	101	402	44.99	1
biological_process	GO:0009987	cellular process	5	103	402	44.11	1
biological_process	GO:0016525	negative regulation of angiogenesis	6	202	402	26.99	1
cellular_component	GO:0005615	extracellular space	35	3123	402	10.18	1
biological_process	GO:0051799	negative regulation of hair follicle development	4	5	402	726.96	0.99
biological_process	GO:0021543	pallium development	4	6	402	605.8	0.99
biological_process	GO:0021778	oligodendrocyte cell fate specification	4	6	402	605.8	0.99
biological_process	GO:0021796	cerebral cortex regionalization	4	6	402	605.8	0.99
biological_process	GO:0060594	mammary gland specification	4	6	402	605.8	0.99
biological_process	GO:0060738	epithelial-mesenchymal signaling involved in prostate gland development	4	6	402	605.8	0.99
biological_process	GO:0060977	coronary vasculature morphogenesis	4	6	402	605.8	0.99
biological_process	GO:0021779	oligodendrocyte cell fate commitment	4	7	402	519.26	0.99
biological_process	GO:0022898	regulation of transmembrane transporter activity	4	7	402	519.26	0.99
biological_process	GO:0060741	prostate gland stromal morphogenesis	4	7	402	519.26	0.99
biological_process	GO:2000017	positive regulation of determination of dorsal identity	4	7	402	519.26	0.99
biological_process	GO:2000729	positive regulation of mesenchymal cell proliferation involved in ureter development	4	7	402	519.26	0.99
biological_process	GO:0003160	endocardium morphogenesis	4	8	402	454.35	0.99
biological_process	GO:0046639	negative regulation of alpha-beta T cell differentiation	4	8	402	454.35	0.99
molecular_function	GO:0001047	core promoter binding	5	106	402	42.86	0.99
biological_process	GO:0035050	embryonic heart tube development	5	107	402	42.46	0.99
biological_process	GO:0003256	regulation of transcription from RNA polymerase II promoter involved in myocardial precursor cell differentiation	4	9	402	403.87	0.98
biological_process	GO:0003338	metanephros morphogenesis	4	9	402	403.87	0.98
biological_process	GO:0009912	auditory receptor cell fate commitment	4	9	402	403.87	0.98
biological_process	GO:0021978	telencephalon regionalization	4	9	402	403.87	0.98
biological_process	GO:0033092	positive regulation of immature T cell proliferation in thymus	4	9	402	403.87	0.98
biological_process	GO:0060528	secretory columnal luminar epithelial cell differentiation involved in prostate glandular acinus development	4	9	402	403.87	0.98
biological_process	GO:0060769	positive regulation of epithelial cell proliferation involved in prostate gland development	4	9	402	403.87	0.98
biological_process	GO:0060842	arterial endothelial cell differentiation	4	9	402	403.87	0.98
cellular_component	GO:0002193	MAML1-RBP-Jkappa- ICN1 complex	4	9	402	403.87	0.98
biological_process	GO:0002360	T cell lineage commitment	4	10	402	363.48	0.98
biological_process	GO:0003157	endocardium development	4	10	402	363.48	0.98
biological_process	GO:0003266	regulation of secondary heart field cardioblast proliferation	4	10	402	363.48	0.98
biological_process	GO:0008065	establishment of blood-nerve barrier	4	10	402	363.48	0.98
biological_process	GO:0021938	smoothened signaling pathway involved in regulation of cerebellar granule cell precursor cell proliferation	4	10	402	363.48	0.98
biological_process	GO:0060440	trachea formation	4	10	402	363.48	0.98
biological_process	GO:0060742	epithelial cell differentiation involved in prostate gland development	4	10	402	363.48	0.98
biological_process	GO:0060948	cardiac vascular smooth muscle cell development	4	10	402	363.48	0.98
biological_process	GO:0061049	cell growth involved in cardiac muscle cell development	4	10	402	363.48	0.98
biological_process	GO:0061198	fungiform papilla formation	4	10	402	363.48	0.98
biological_process	GO:0072602	interleukin-4 secretion	4	10	402	363.48	0.98
biological_process	GO:0021798	forebrain dorsal/ventral pattern formation	4	11	402	330.44	0.98
biological_process	GO:0060430	lung saccule development	4	11	402	330.44	0.98
biological_process	GO:0060665	regulation of branching involved in salivary gland morphogenesis by mesenchymal-epithelial signaling	4	11	402	330.44	0.98
biological_process	GO:0072193	ureter smooth muscle cell differentiation	4	11	402	330.44	0.98
molecular_function	GO:0032451	demethylase activity	4	11	402	330.44	0.98
biological_process	GO:0010463	mesenchymal cell proliferation	4	12	402	302.9	0.98
biological_process	GO:0060916	mesenchymal cell proliferation involved in lung development	4	12	402	302.9	0.98
molecular_function	GO:0070326	very-low-density lipoprotein particle receptor binding	4	12	402	302.9	0.98
biological_process	GO:0050715	positive regulation of cytokine secretion	5	112	402	40.57	0.98
biological_process	GO:0050790	regulation of catalytic activity	6	215	402	25.36	0.98
biological_process	GO:0006874	cellular calcium ion homeostasis	7	316	402	20.13	0.98
biological_process	GO:0003014	renal system process	4	13	402	279.6	0.97
biological_process	GO:0007221	positive regulation of transcription of Notch receptor target	4	13	402	279.6	0.97
biological_process	GO:0032808	lacrimal gland development	4	13	402	279.6	0.97
biological_process	GO:0048505	regulation of timing of cell differentiation	4	13	402	279.6	0.97
biological_process	GO:0060363	cranial suture morphogenesis	4	13	402	279.6	0.97
biological_process	GO:0060438	trachea development	4	13	402	279.6	0.97
biological_process	GO:0061047	positive regulation of branching involved in lung morphogenesis	4	13	402	279.6	0.97
biological_process	GO:0072095	regulation of branch elongation involved in ureteric bud branching	4	13	402	279.6	0.97
biological_process	GO:2001235	positive regulation of apoptotic signaling pathway	4	13	402	279.6	0.97
biological_process	GO:0021513	spinal cord dorsal/ventral patterning	4	14	402	259.63	0.97
biological_process	GO:0060235	lens induction in camera-type eye	4	14	402	259.63	0.97
biological_process	GO:0002260	lymphocyte homeostasis	4	15	402	242.32	0.97
biological_process	GO:0021889	olfactory bulb interneuron differentiation	4	15	402	242.32	0.97
biological_process	GO:0030850	prostate gland development	4	15	402	242.32	0.97
biological_process	GO:0033088	negative regulation of immature T cell proliferation in thymus	4	15	402	242.32	0.97
biological_process	GO:0035912	dorsal aorta morphogenesis	4	15	402	242.32	0.97
biological_process	GO:0042063	gliogenesis	4	15	402	242.32	0.97
molecular_function	GO:0030350	iron-responsive element binding	4	15	402	242.32	0.97
biological_process	GO:0007228	positive regulation of hh target transcription factor activity	4	16	402	227.18	0.97
biological_process	GO:0042487	regulation of odontogenesis of dentin-containing tooth	4	16	402	227.18	0.97
biological_process	GO:0060428	lung epithelium development	4	16	402	227.18	0.97
biological_process	GO:0060575	intestinal epithelial cell differentiation	4	16	402	227.18	0.97
biological_process	GO:0061035	regulation of cartilage development	4	16	402	227.18	0.97
molecular_function	GO:0051525	NFAT protein binding	4	16	402	227.18	0.97
biological_process	GO:0032956	regulation of actin cytoskeleton organization	5	117	402	38.83	0.97
cellular_component	GO:0016604	nuclear body	5	118	402	38.5	0.97
biological_process	GO:0007189	adenylate cyclase-activating G-protein coupled receptor signaling pathway	5	120	402	37.86	0.97
biological_process	GO:0071347	cellular response to interleukin-1	5	121	402	37.55	0.97
biological_process	GO:0035990	tendon cell differentiation	4	17	402	213.81	0.96
biological_process	GO:0051451	myoblast migration	4	17	402	213.81	0.96
biological_process	GO:0060411	cardiac septum morphogenesis	4	17	402	213.81	0.96
biological_process	GO:0071372	cellular response to follicle-stimulating hormone stimulus	4	17	402	213.81	0.96
biological_process	GO:0048864	stem cell development	4	18	402	201.93	0.96
biological_process	GO:0060510	Type II pneumocyte differentiation	4	18	402	201.93	0.96
molecular_function	GO:0045322	unmethylated CpG binding	4	18	402	201.93	0.96
biological_process	GO:0003184	pulmonary valve morphogenesis	4	19	402	191.31	0.96
molecular_function	GO:0097371	MDM2/MDM4 family protein binding	4	19	402	191.31	0.96
biological_process	GO:0042551	neuron maturation	4	20	402	181.74	0.96
biological_process	GO:0045906	negative regulation of vasoconstriction	4	20	402	181.74	0.96
biological_process	GO:0090191	negative regulation of branching involved in ureteric bud morphogenesis	4	20	402	181.74	0.96
cellular_component	GO:0005669	transcription factor TFIID complex	5	125	402	36.35	0.96
biological_process	GO:0030509	BMP signaling pathway	6	226	402	24.12	0.96
biological_process	GO:0001710	mesodermal cell fate commitment	4	21	402	173.09	0.95
biological_process	GO:0003139	secondary heart field specification	4	21	402	173.09	0.95
biological_process	GO:0003140	determination of left/right asymmetry in lateral mesoderm	4	21	402	173.09	0.95
biological_process	GO:0010873	positive regulation of cholesterol esterification	4	21	402	173.09	0.95
biological_process	GO:0021508	floor plate formation	4	21	402	173.09	0.95
biological_process	GO:0031643	positive regulation of myelination	4	21	402	173.09	0.95
biological_process	GO:0033089	positive regulation of T cell differentiation in thymus	4	21	402	173.09	0.95
biological_process	GO:0043587	tongue morphogenesis	4	21	402	173.09	0.95
biological_process	GO:0045955	negative regulation of calcium ion-dependent exocytosis	4	21	402	173.09	0.95
biological_process	GO:0048660	regulation of smooth muscle cell proliferation	4	21	402	173.09	0.95
biological_process	GO:0050892	intestinal absorption	4	21	402	173.09	0.95
biological_process	GO:0048515	spermatid differentiation	4	22	402	165.22	0.95
biological_process	GO:0048732	gland development	4	22	402	165.22	0.95
biological_process	GO:0070365	hepatocyte differentiation	4	22	402	165.22	0.95
molecular_function	GO:0005113	patched binding	4	22	402	165.22	0.95
biological_process	GO:0000904	cell morphogenesis involved in differentiation	4	23	402	158.04	0.95
biological_process	GO:0003337	mesenchymal to epithelial transition involved in metanephros morphogenesis	4	23	402	158.04	0.95
biological_process	GO:0045670	regulation of osteoclast differentiation	4	23	402	158.04	0.95
biological_process	GO:0046638	positive regulation of alpha-beta T cell differentiation	4	23	402	158.04	0.95
biological_process	GO:0060253	negative regulation of glial cell proliferation	4	23	402	158.04	0.95
biological_process	GO:0071475	cellular hyperosmotic salinity response	4	23	402	158.04	0.95
biological_process	GO:0071773	cellular response to BMP stimulus	4	23	402	158.04	0.95
biological_process	GO:0042693	muscle cell fate commitment	4	24	402	151.45	0.95
biological_process	GO:0045945	positive regulation of transcription from RNA polymerase III promoter	4	24	402	151.45	0.95
biological_process	GO:0060174	limb bud formation	4	24	402	151.45	0.95
biological_process	GO:0060442	branching involved in prostate gland morphogenesis	4	24	402	151.45	0.95
biological_process	GO:0060664	epithelial cell proliferation involved in salivary gland morphogenesis	4	24	402	151.45	0.95
biological_process	GO:0072107	positive regulation of ureteric bud formation	4	24	402	151.45	0.95
biological_process	GO:2000678	negative regulation of transcription regulatory region DNA binding	4	24	402	151.45	0.95
biological_process	GO:0003181	atrioventricular valve morphogenesis	4	25	402	145.39	0.95
biological_process	GO:0007616	long-term memory	5	129	402	35.22	0.95
molecular_function	GO:0004693	cyclin-dependent protein kinase activity	5	129	402	35.22	0.95
cellular_component	GO:0043231	intracellular membrane-bounded organelle	20	1719	402	10.57	0.95
biological_process	GO:0033148	positive regulation of intracellular estrogen receptor signaling pathway	4	26	402	139.8	0.94
biological_process	GO:0045060	negative thymic T cell selection	4	26	402	139.8	0.94
biological_process	GO:0046628	positive regulation of insulin receptor signaling pathway	4	26	402	139.8	0.94
biological_process	GO:0071371	cellular response to gonadotropin stimulus	4	27	402	134.62	0.94
cellular_component	GO:0005652	nuclear lamina	4	27	402	134.62	0.94
biological_process	GO:0061053	somite development	4	28	402	129.81	0.94
biological_process	GO:0001711	endodermal cell fate commitment	4	29	402	125.34	0.94
biological_process	GO:0071363	cellular response to growth factor stimulus	5	135	402	33.66	0.94
molecular_function	GO:0000977	RNA polymerase II regulatory region sequence-specific DNA binding	5	135	402	33.66	0.94
cellular_component	GO:0005901	caveola	6	240	402	22.72	0.94
molecular_function	GO:0008301	DNA binding, bending	7	350	402	18.17	0.94
cellular_component	GO:0000790	nuclear chromatin	9	563	402	14.53	0.94
biological_process	GO:0021879	forebrain neuron differentiation	4	30	402	121.16	0.93
biological_process	GO:0072075	metanephric mesenchyme development	4	30	402	121.16	0.93
biological_process	GO:0060487	lung epithelial cell differentiation	4	31	402	117.25	0.93
biological_process	GO:0003198	epithelial to mesenchymal transition involved in endocardial cushion formation	4	32	402	113.59	0.93
biological_process	GO:0003203	endocardial cushion morphogenesis	4	32	402	113.59	0.93
biological_process	GO:0006110	regulation of glycolysis	4	32	402	113.59	0.93
biological_process	GO:0007442	hindgut morphogenesis	4	32	402	113.59	0.93
biological_process	GO:0045667	regulation of osteoblast differentiation	4	32	402	113.59	0.93
biological_process	GO:0060272	embryonic skeletal joint morphogenesis	4	32	402	113.59	0.93
biological_process	GO:0001829	trophectodermal cell differentiation	4	33	402	110.15	0.93
biological_process	GO:0008582	regulation of synaptic growth at neuromuscular junction	4	33	402	110.15	0.93
biological_process	GO:0045839	negative regulation of mitosis	4	33	402	110.15	0.93
biological_process	GO:0032496	response to lipopolysaccharide	7	361	402	17.62	0.93
biological_process	GO:0007268	synaptic transmission	10	683	402	13.3	0.93
biological_process	GO:0042789	mRNA transcription from RNA polymerase II promoter	4	35	402	103.85	0.92
biological_process	GO:0048752	semicircular canal morphogenesis	4	35	402	103.85	0.92
biological_process	GO:0006541	glutamine metabolic process	4	36	402	100.97	0.92
biological_process	GO:0042311	vasodilation	4	36	402	100.97	0.92
biological_process	GO:0042445	hormone metabolic process	4	36	402	100.97	0.92
biological_process	GO:0046622	positive regulation of organ growth	4	36	402	100.97	0.92
molecular_function	GO:0035257	nuclear hormone receptor binding	4	36	402	100.97	0.92
molecular_function	GO:0008327	methyl-CpG binding	4	39	402	93.2	0.92
biological_process	GO:0040014	regulation of multicellular organism growth	5	149	402	30.49	0.92
biological_process	GO:0043407	negative regulation of MAP kinase activity	5	149	402	30.49	0.92
molecular_function	GO:0003729	mRNA binding	9	587	402	13.93	0.92
biological_process	GO:0003148	outflow tract septum morphogenesis	4	40	402	90.87	0.91
biological_process	GO:0048730	epidermis morphogenesis	4	40	402	90.87	0.91
biological_process	GO:0002437	inflammatory response to antigenic stimulus	4	41	402	88.65	0.91
biological_process	GO:2000811	negative regulation of anoikis	4	41	402	88.65	0.91
biological_process	GO:0035774	positive regulation of insulin secretion involved in cellular response to glucose stimulus	4	42	402	86.54	0.91
biological_process	GO:0045069	regulation of viral genome replication	4	42	402	86.54	0.91
biological_process	GO:0060716	labyrinthine layer blood vessel development	4	42	402	86.54	0.91
biological_process	GO:0010719	negative regulation of epithelial to mesenchymal transition	4	43	402	84.53	0.91
biological_process	GO:0000077	DNA damage checkpoint	5	151	402	30.09	0.91
biological_process	GO:0071456	cellular response to hypoxia	6	262	402	20.81	0.91
biological_process	GO:0009636	response to toxin	7	372	402	17.1	0.91
cellular_component	GO:0005635	nuclear envelope	9	595	402	13.75	0.91
biological_process	GO:0007585	respiratory gaseous exchange	4	44	402	82.61	0.9
biological_process	GO:0042523	positive regulation of tyrosine phosphorylation of Stat5 protein	4	45	402	80.77	0.9
cellular_component	GO:0044424	intracellular part	4	45	402	80.77	0.9
biological_process	GO:0001782	B cell homeostasis	4	47	402	77.34	0.9
biological_process	GO:0000902	cell morphogenesis	7	383	402	16.61	0.9
biological_process	GO:0007141	male meiosis I	4	50	402	72.7	0.89
biological_process	GO:0048593	camera-type eye morphogenesis	4	50	402	72.7	0.89
biological_process	GO:0001662	behavioral fear response	4	51	402	71.27	0.89
biological_process	GO:0042157	lipoprotein metabolic process	4	52	402	69.9	0.89
biological_process	GO:0061036	positive regulation of cartilage development	4	52	402	69.9	0.89
biological_process	GO:0007494	midgut development	4	53	402	68.58	0.89
biological_process	GO:0032270	positive regulation of cellular protein metabolic process	4	53	402	68.58	0.89
biological_process	GO:0010507	negative regulation of autophagy	4	54	402	67.31	0.88
biological_process	GO:0030316	osteoclast differentiation	4	54	402	67.31	0.88
biological_process	GO:0050910	detection of mechanical stimulus involved in sensory perception of sound	4	54	402	67.31	0.88
biological_process	GO:0051968	positive regulation of synaptic transmission, glutamatergic	4	54	402	67.31	0.88
biological_process	GO:0048745	smooth muscle tissue development	4	55	402	66.09	0.88
biological_process	GO:0032332	positive regulation of chondrocyte differentiation	4	56	402	64.91	0.88
biological_process	GO:0055088	lipid homeostasis	4	58	402	62.67	0.88
molecular_function	GO:0005159	insulin-like growth factor receptor binding	4	58	402	62.67	0.88
biological_process	GO:0007405	neuroblast proliferation	4	59	402	61.61	0.88
molecular_function	GO:0000983	RNA polymerase II core promoter sequence-specific DNA binding transcription factor activity	4	59	402	61.61	0.88
biological_process	GO:0001892	embryonic placenta development	4	60	402	60.58	0.87
biological_process	GO:0002244	hematopoietic progenitor cell differentiation	4	61	402	59.59	0.87
biological_process	GO:0071158	positive regulation of cell cycle arrest	4	61	402	59.59	0.87
molecular_function	GO:0005104	fibroblast growth factor receptor binding	4	63	402	57.7	0.87
biological_process	GO:0045880	positive regulation of smoothened signaling pathway	4	64	402	56.79	0.87
biological_process	GO:0055007	cardiac muscle cell differentiation	4	64	402	56.79	0.87
cellular_component	GO:0001673	male germ cell nucleus	4	64	402	56.79	0.87
biological_process	GO:0030198	extracellular matrix organization	6	294	402	18.54	0.87
cellular_component	GO:0045121	membrane raft	9	636	402	12.86	0.87
biological_process	GO:0014003	oligodendrocyte development	4	65	402	55.92	0.86
biological_process	GO:0007143	female meiosis	4	66	402	55.07	0.86
biological_process	GO:0060439	trachea morphogenesis	4	66	402	55.07	0.86
molecular_function	GO:0003680	AT DNA binding	4	66	402	55.07	0.86
molecular_function	GO:0000988	protein binding transcription factor activity	4	67	402	54.25	0.86
biological_process	GO:0045671	negative regulation of osteoclast differentiation	4	69	402	52.68	0.86
biological_process	GO:0008104	protein localization	6	300	402	18.17	0.86
biological_process	GO:0051607	defense response to virus	6	303	402	17.99	0.86
biological_process	GO:0042326	negative regulation of phosphorylation	4	70	402	51.93	0.85
biological_process	GO:0010718	positive regulation of epithelial to mesenchymal transition	4	71	402	51.19	0.85
biological_process	GO:0035115	embryonic forelimb morphogenesis	4	71	402	51.19	0.85
biological_process	GO:0042177	negative regulation of protein catabolic process	4	72	402	50.48	0.85
biological_process	GO:0048599	oocyte development	4	73	402	49.79	0.85
cellular_component	GO:0005657	replication fork	4	73	402	49.79	0.85
cellular_component	GO:0030140	trans-Golgi network transport vesicle	4	73	402	49.79	0.85
biological_process	GO:0032967	positive regulation of collagen biosynthetic process	4	74	402	49.12	0.85
molecular_function	GO:0005158	insulin receptor binding	4	74	402	49.12	0.85
biological_process	GO:0008219	cell death	6	309	402	17.64	0.85
biological_process	GO:0006629	lipid metabolic process	7	429	402	14.83	0.85
biological_process	GO:0061098	positive regulation of protein tyrosine kinase activity	4	77	402	47.21	0.84
cellular_component	GO:0000792	heterochromatin	4	77	402	47.21	0.84
biological_process	GO:0060395	SMAD protein signal transduction	4	78	402	46.6	0.84
biological_process	GO:0009954	proximal/distal pattern formation	4	79	402	46.01	0.84
biological_process	GO:0048844	artery morphogenesis	4	79	402	46.01	0.84
molecular_function	GO:0043425	bHLH transcription factor binding	4	79	402	46.01	0.84
biological_process	GO:0030879	mammary gland development	4	80	402	45.44	0.84
biological_process	GO:0043552	positive regulation of phosphatidylinositol 3-kinase activity	4	80	402	45.44	0.84
biological_process	GO:0006878	cellular copper ion homeostasis	4	81	402	44.87	0.84
biological_process	GO:0007398	ectoderm development	4	81	402	44.87	0.84
biological_process	GO:0048661	positive regulation of smooth muscle cell proliferation	5	197	402	23.06	0.84
biological_process	GO:0071230	cellular response to amino acid stimulus	5	200	402	22.72	0.84
biological_process	GO:0017144	drug metabolic process	4	84	402	43.27	0.83
biological_process	GO:0034394	protein localization to cell surface	4	85	402	42.76	0.83
biological_process	GO:0043507	positive regulation of JUN kinase activity	4	86	402	42.27	0.83
biological_process	GO:0048469	cell maturation	4	86	402	42.27	0.83
biological_process	GO:0051924	regulation of calcium ion transport	4	86	402	42.27	0.83
biological_process	GO:0001890	placenta development	4	87	402	41.78	0.82
biological_process	GO:0006641	triglyceride metabolic process	4	88	402	41.3	0.82
biological_process	GO:0007257	activation of JUN kinase activity	4	89	402	40.84	0.82
biological_process	GO:0050853	B cell receptor signaling pathway	4	90	402	40.39	0.82
biological_process	GO:0070371	ERK1 and ERK2 cascade	4	90	402	40.39	0.82
molecular_function	GO:0070491	repressing transcription factor binding	4	90	402	40.39	0.82
cellular_component	GO:0005929	cilium	5	213	402	21.33	0.82
cellular_component	GO:0072372	primary cilium	4	95	402	38.26	0.81
molecular_function	GO:0001085	RNA polymerase II transcription factor binding	4	95	402	38.26	0.81
biological_process	GO:0042327	positive regulation of phosphorylation	4	96	402	37.86	0.81
biological_process	GO:0007566	embryo implantation	4	97	402	37.47	0.81
biological_process	GO:0051930	regulation of sensory perception of pain	4	97	402	37.47	0.81
biological_process	GO:0042542	response to hydrogen peroxide	6	341	402	15.99	0.81
molecular_function	GO:0008144	drug binding	6	347	402	15.71	0.81
molecular_function	GO:0030165	PDZ domain binding	6	347	402	15.71	0.81
biological_process	GO:0042476	odontogenesis	4	99	402	36.72	0.8
biological_process	GO:0071560	cellular response to transforming growth factor beta stimulus	4	99	402	36.72	0.8
molecular_function	GO:0001102	RNA polymerase II activating transcription factor binding	4	102	402	35.64	0.8
biological_process	GO:0007569	cell aging	4	104	402	34.95	0.8
biological_process	GO:0031647	regulation of protein stability	4	104	402	34.95	0.8
biological_process	GO:0018105	peptidyl-serine phosphorylation	5	226	402	20.1	0.8
biological_process	GO:0008543	fibroblast growth factor receptor signaling pathway	5	230	402	19.75	0.8
biological_process	GO:0070374	positive regulation of ERK1 and ERK2 cascade	6	355	402	15.36	0.8
cellular_component	GO:0005622	intracellular	16	1625	402	8.95	0.8
biological_process	GO:0021766	hippocampus development	4	106	402	34.29	0.79
biological_process	GO:0016458	gene silencing	4	107	402	33.97	0.79
molecular_function	GO:0004857	enzyme inhibitor activity	4	108	402	33.66	0.79
biological_process	GO:0009950	dorsal/ventral axis specification	4	109	402	33.35	0.79
biological_process	GO:0051402	neuron apoptotic process	4	111	402	32.75	0.79
cellular_component	GO:0000785	chromatin	6	366	402	14.9	0.79
biological_process	GO:0009887	organ morphogenesis	6	368	402	14.82	0.79
biological_process	GO:0006897	endocytosis	7	488	402	13.03	0.79
biological_process	GO:0001942	hair follicle development	4	112	402	32.45	0.78
biological_process	GO:0035176	social behavior	4	113	402	32.17	0.78
molecular_function	GO:0051539	4 iron, 4 sulfur cluster binding	4	113	402	32.17	0.78
biological_process	GO:0016042	lipid catabolic process	4	118	402	30.8	0.78
biological_process	GO:0007286	spermatid development	5	241	402	18.85	0.78
biological_process	GO:0009612	response to mechanical stimulus	5	241	402	18.85	0.78
biological_process	GO:0007281	germ cell development	5	245	402	18.54	0.78
biological_process	GO:0006006	glucose metabolic process	5	248	402	18.32	0.78
biological_process	GO:0001934	positive regulation of protein phosphorylation	6	378	402	14.42	0.78
biological_process	GO:0048812	neuron projection morphogenesis	4	120	402	30.29	0.77
biological_process	GO:0030514	negative regulation of BMP signaling pathway	4	123	402	29.55	0.77
biological_process	GO:0051897	positive regulation of protein kinase B signaling cascade	5	256	402	17.75	0.77
biological_process	GO:0006367	transcription initiation from RNA polymerase II promoter	6	381	402	14.31	0.77
biological_process	GO:0008203	cholesterol metabolic process	4	125	402	29.08	0.76
molecular_function	GO:0070888	E-box binding	4	131	402	27.75	0.76
biological_process	GO:0006352	DNA-dependent transcription, initiation	5	258	402	17.61	0.76
molecular_function	GO:0008022	protein C-terminus binding	7	526	402	12.09	0.76
biological_process	GO:0010573	vascular endothelial growth factor production	3	3	402	908.7	0.75
biological_process	GO:0034645	cellular macromolecule biosynthetic process	3	3	402	908.7	0.75
biological_process	GO:0051541	elastin metabolic process	3	3	402	908.7	0.75
biological_process	GO:0060795	cell fate commitment involved in formation of primary germ layer	3	3	402	908.7	0.75
biological_process	GO:0090081	regulation of heart induction by regulation of canonical Wnt receptor signaling pathway	3	3	402	908.7	0.75
biological_process	GO:0090308	regulation of methylation-dependent chromatin silencing	3	3	402	908.7	0.75
biological_process	GO:2000979	positive regulation of forebrain neuron differentiation	3	3	402	908.7	0.75
molecular_function	GO:0030379	neurotensin receptor activity, non-G-protein coupled	3	3	402	908.7	0.75
molecular_function	GO:0097063	cadmium ion sensor activity	3	3	402	908.7	0.75
molecular_function	GO:0001948	glycoprotein binding	4	134	402	27.13	0.75
biological_process	GO:1901189	positive regulation of ephrin receptor signaling pathway	3	4	402	681.53	0.74
biological_process	GO:0043697	cell dedifferentiation	3	5	402	545.22	0.74
biological_process	GO:0048227	plasma membrane to endosome transport	3	5	402	545.22	0.74
biological_process	GO:0021769	orbitofrontal cortex development	3	6	402	454.35	0.74
biological_process	GO:0060849	regulation of transcription involved in lymphatic endothelial cell fate commitment	3	6	402	454.35	0.74
biological_process	GO:0070858	negative regulation of bile acid biosynthetic process	3	6	402	454.35	0.74
molecular_function	GO:0005141	interleukin-10 receptor binding	3	6	402	454.35	0.74
biological_process	GO:0001922	B-1 B cell homeostasis	3	7	402	389.44	0.74
biological_process	GO:0003195	tricuspid valve formation	3	7	402	389.44	0.74
biological_process	GO:0030888	regulation of B cell proliferation	3	7	402	389.44	0.74
biological_process	GO:0060414	aorta smooth muscle tissue morphogenesis	3	7	402	389.44	0.74
molecular_function	GO:0010465	nerve growth factor receptor activity	3	7	402	389.44	0.74
biological_process	GO:0003192	mitral valve formation	3	8	402	340.76	0.74
biological_process	GO:0032509	endosome transport via multivesicular body sorting pathway	3	8	402	340.76	0.74
biological_process	GO:2000773	negative regulation of cellular senescence	3	8	402	340.76	0.74
molecular_function	GO:0050692	DBD domain binding	3	8	402	340.76	0.74
biological_process	GO:0007493	endodermal cell fate determination	3	9	402	302.9	0.74
molecular_function	GO:0071535	RING-like zinc finger domain binding	3	9	402	302.9	0.74
cellular_component	GO:0031012	extracellular matrix	7	553	402	11.5	0.74
biological_process	GO:0046886	positive regulation of hormone biosynthetic process	3	10	402	272.61	0.73
biological_process	GO:0060421	positive regulation of heart growth	3	10	402	272.61	0.73
biological_process	GO:0060965	negative regulation of gene silencing by miRNA	3	10	402	272.61	0.73
biological_process	GO:0010717	regulation of epithelial to mesenchymal transition	3	11	402	247.83	0.73
biological_process	GO:0035054	embryonic heart tube anterior/posterior pattern specification	3	11	402	247.83	0.73
biological_process	GO:0002248	connective tissue replacement involved in inflammatory response wound healing	3	12	402	227.18	0.73
biological_process	GO:0030910	olfactory placode formation	3	12	402	227.18	0.73
biological_process	GO:0032909	regulation of transforming growth factor beta2 production	3	12	402	227.18	0.73
biological_process	GO:0070309	lens fiber cell morphogenesis	3	12	402	227.18	0.73
molecular_function	GO:0033130	acetylcholine receptor binding	3	12	402	227.18	0.73
molecular_function	GO:0050693	LBD domain binding	3	12	402	227.18	0.73
biological_process	GO:0031102	neuron projection regeneration	3	13	402	209.7	0.73
biological_process	GO:0042737	drug catabolic process	3	13	402	209.7	0.73
biological_process	GO:0060214	endocardium formation	3	13	402	209.7	0.73
biological_process	GO:0045646	regulation of erythrocyte differentiation	3	14	402	194.72	0.73
biological_process	GO:0048845	venous blood vessel morphogenesis	3	14	402	194.72	0.73
biological_process	GO:0060298	positive regulation of sarcomere organization	3	14	402	194.72	0.73
biological_process	GO:0060947	cardiac vascular smooth muscle cell differentiation	3	14	402	194.72	0.73
molecular_function	GO:0032791	lead ion binding	3	14	402	194.72	0.73
molecular_function	GO:0005080	protein kinase C binding	4	149	402	24.39	0.73
biological_process	GO:0071260	cellular response to mechanical stimulus	4	150	402	24.23	0.73
molecular_function	GO:0019900	kinase binding	4	152	402	23.91	0.73
biological_process	GO:0090263	positive regulation of canonical Wnt receptor signaling pathway	4	153	402	23.76	0.73
biological_process	GO:0030168	platelet activation	5	285	402	15.94	0.73
biological_process	GO:0046686	response to cadmium ion	7	558	402	11.4	0.73
biological_process	GO:0048477	oogenesis	7	558	402	11.4	0.73
biological_process	GO:0010040	response to iron(II) ion	3	15	402	181.74	0.72
biological_process	GO:0051005	negative regulation of lipoprotein lipase activity	3	15	402	181.74	0.72
biological_process	GO:0055005	ventricular cardiac myofibril development	3	15	402	181.74	0.72
biological_process	GO:0060836	lymphatic endothelial cell differentiation	3	15	402	181.74	0.72
biological_process	GO:0010159	specification of organ position	3	16	402	170.38	0.72
biological_process	GO:0032364	oxygen homeostasis	3	16	402	170.38	0.72
biological_process	GO:0060956	endocardial cell differentiation	3	16	402	170.38	0.72
biological_process	GO:0060982	coronary artery morphogenesis	3	16	402	170.38	0.72
molecular_function	GO:0005025	transforming growth factor beta receptor activity, type I	3	16	402	170.38	0.72
biological_process	GO:0055013	cardiac muscle cell development	3	17	402	160.36	0.72
biological_process	GO:0021516	dorsal spinal cord development	3	18	402	151.45	0.72
biological_process	GO:0061314	Notch signaling involved in heart development	3	18	402	151.45	0.72
biological_process	GO:2000036	regulation of stem cell maintenance	3	18	402	151.45	0.72
biological_process	GO:0021707	cerebellar granule cell differentiation	3	19	402	143.48	0.72
biological_process	GO:0010870	positive regulation of receptor biosynthetic process	3	20	402	136.31	0.72
biological_process	GO:0046323	glucose import	3	20	402	136.31	0.72
biological_process	GO:0048702	embryonic neurocranium morphogenesis	3	20	402	136.31	0.72
biological_process	GO:0001937	negative regulation of endothelial cell proliferation	4	154	402	23.6	0.72
molecular_function	GO:0019903	protein phosphatase binding	4	155	402	23.45	0.72
biological_process	GO:0048666	neuron development	4	157	402	23.15	0.72
biological_process	GO:0007254	JNK cascade	4	160	402	22.72	0.72
biological_process	GO:0001558	regulation of cell growth	4	161	402	22.58	0.72
biological_process	GO:0031536	positive regulation of exit from mitosis	3	21	402	129.81	0.71
biological_process	GO:0032963	collagen metabolic process	3	21	402	129.81	0.71
biological_process	GO:0055009	atrial cardiac muscle tissue morphogenesis	3	22	402	123.91	0.71
biological_process	GO:0003382	epithelial cell morphogenesis	3	23	402	118.53	0.71
biological_process	GO:0019896	axon transport of mitochondrion	3	23	402	118.53	0.71
biological_process	GO:0043619	regulation of transcription from RNA polymerase II promoter in response to oxidative stress	3	25	402	109.04	0.71
biological_process	GO:0001783	B cell apoptotic process	3	26	402	104.85	0.71
cellular_component	GO:0044428	nuclear part	3	26	402	104.85	0.71
biological_process	GO:0006309	apoptotic DNA fragmentation	4	162	402	22.44	0.71
biological_process	GO:0007160	cell-matrix adhesion	4	162	402	22.44	0.71
biological_process	GO:0007565	female pregnancy	4	162	402	22.44	0.71
biological_process	GO:0019233	sensory perception of pain	4	162	402	22.44	0.71
biological_process	GO:0042632	cholesterol homeostasis	4	163	402	22.3	0.71
biological_process	GO:0016571	histone methylation	4	164	402	22.16	0.71
biological_process	GO:0016573	histone acetylation	4	169	402	21.51	0.71
biological_process	GO:0051090	regulation of sequence-specific DNA binding transcription factor activity	5	308	402	14.75	0.71
biological_process	GO:0008406	gonad development	5	309	402	14.7	0.71
molecular_function	GO:0004867	serine-type endopeptidase inhibitor activity	6	446	402	12.22	0.71
cellular_component	GO:0009986	cell surface	15	1716	402	7.94	0.71
cellular_component	GO:0035068	micro-ribonucleoprotein complex	3	27	402	100.97	0.7
biological_process	GO:0030856	regulation of epithelial cell differentiation	3	28	402	97.36	0.7
biological_process	GO:0010002	cardioblast differentiation	3	29	402	94	0.7
biological_process	GO:0035413	positive regulation of catenin import into nucleus	3	29	402	94	0.7
biological_process	GO:0043281	regulation of cysteine-type endopeptidase activity involved in apoptotic process	3	29	402	94	0.7
biological_process	GO:0032800	receptor biosynthetic process	3	30	402	90.87	0.7
molecular_function	GO:0070411	I-SMAD binding	3	31	402	87.94	0.7
biological_process	GO:0009725	response to hormone stimulus	4	176	402	20.65	0.7
biological_process	GO:0006397	mRNA processing	4	177	402	20.54	0.7
molecular_function	GO:0046872	metal ion binding	5	314	402	14.47	0.7
cellular_component	GO:0016323	basolateral plasma membrane	6	462	402	11.8	0.7
biological_process	GO:0031000	response to caffeine	3	33	402	82.61	0.69
biological_process	GO:0045821	positive regulation of glycolysis	3	33	402	82.61	0.69
biological_process	GO:0051045	negative regulation of membrane protein ectodomain proteolysis	3	33	402	82.61	0.69
biological_process	GO:0050673	epithelial cell proliferation	3	34	402	80.18	0.69
biological_process	GO:0051571	positive regulation of histone H3-K4 methylation	3	35	402	77.89	0.69
biological_process	GO:0051443	positive regulation of ubiquitin-protein ligase activity	3	36	402	75.73	0.69
biological_process	GO:0002740	negative regulation of cytokine secretion involved in immune response	3	38	402	71.74	0.69
biological_process	GO:0010288	response to lead ion	3	38	402	71.74	0.69
biological_process	GO:0051291	protein heterooligomerization	4	185	402	19.65	0.69
cellular_component	GO:0005769	early endosome	6	477	402	11.43	0.69
biological_process	GO:0008593	regulation of Notch signaling pathway	3	39	402	69.9	0.68
biological_process	GO:0071549	cellular response to dexamethasone stimulus	3	39	402	69.9	0.68
biological_process	GO:0031054	pre-miRNA processing	3	41	402	66.49	0.68
biological_process	GO:0060042	retina morphogenesis in camera-type eye	3	41	402	66.49	0.68
cellular_component	GO:0016442	RNA-induced silencing complex	3	41	402	66.49	0.68
biological_process	GO:0051000	positive regulation of nitric-oxide synthase activity	3	43	402	63.4	0.68
biological_process	GO:0007431	salivary gland development	3	44	402	61.96	0.68
biological_process	GO:0001954	positive regulation of cell-matrix adhesion	3	45	402	60.58	0.68
biological_process	GO:0045750	positive regulation of S phase of mitotic cell cycle	3	45	402	60.58	0.68
biological_process	GO:0043434	response to peptide hormone stimulus	4	190	402	19.13	0.68
biological_process	GO:0001843	neural tube closure	4	192	402	18.93	0.68
cellular_component	GO:0005770	late endosome	5	335	402	13.56	0.68
cellular_component	GO:0045202	synapse	6	487	402	11.2	0.68
molecular_function	GO:0020037	heme binding	7	632	402	10.06	0.68
biological_process	GO:0071391	cellular response to estrogen stimulus	3	46	402	59.26	0.67
molecular_function	GO:0046870	cadmium ion binding	3	46	402	59.26	0.67
biological_process	GO:0060038	cardiac muscle cell proliferation	3	47	402	58	0.67
biological_process	GO:0016050	vesicle organization	3	48	402	56.79	0.67
biological_process	GO:0032835	glomerulus development	3	49	402	55.63	0.67
biological_process	GO:0045737	positive regulation of cyclin-dependent protein kinase activity	3	49	402	55.63	0.67
biological_process	GO:0045793	positive regulation of cell size	3	50	402	54.52	0.67
biological_process	GO:0006895	Golgi to endosome transport	3	51	402	53.45	0.67
biological_process	GO:0010332	response to gamma radiation	4	195	402	18.64	0.67
biological_process	GO:0030334	regulation of cell migration	4	195	402	18.64	0.67
biological_process	GO:0035195	gene silencing by miRNA	4	199	402	18.27	0.67
molecular_function	GO:0002020	protease binding	4	200	402	18.17	0.67
cellular_component	GO:0005654	nucleoplasm	14	1701	402	7.48	0.67
cellular_component	GO:0005794	Golgi apparatus	26	3481	402	6.79	0.67
biological_process	GO:0048489	synaptic vesicle transport	3	53	402	51.44	0.66
biological_process	GO:0042100	B cell proliferation	3	54	402	50.48	0.66
biological_process	GO:0045638	negative regulation of myeloid cell differentiation	3	54	402	50.48	0.66
biological_process	GO:0001946	lymphangiogenesis	3	55	402	49.57	0.66
molecular_function	GO:0005539	glycosaminoglycan binding	3	55	402	49.57	0.66
biological_process	GO:0042462	eye photoreceptor cell development	3	58	402	47	0.66
molecular_function	GO:0030332	cyclin binding	3	58	402	47	0.66
cellular_component	GO:0035102	PRC1 complex	3	59	402	46.21	0.66
biological_process	GO:0018108	peptidyl-tyrosine phosphorylation	4	205	402	17.73	0.66
molecular_function	GO:0005515	protein binding	115	17195	402	6.08	0.66
biological_process	GO:0042692	muscle cell differentiation	3	62	402	43.97	0.65
cellular_component	GO:0032993	protein-DNA complex	3	63	402	43.27	0.65
biological_process	GO:0045648	positive regulation of erythrocyte differentiation	3	64	402	42.6	0.65
biological_process	GO:0071241	cellular response to inorganic substance	3	66	402	41.3	0.65
biological_process	GO:0030178	negative regulation of Wnt receptor signaling pathway	4	216	402	16.83	0.65
molecular_function	GO:0000978	RNA polymerase II core promoter proximal region sequence-specific DNA binding	4	219	402	16.6	0.65
biological_process	GO:0006351	transcription, DNA-dependent	6	521	402	10.46	0.65
biological_process	GO:0006979	response to oxidative stress	8	829	402	8.77	0.65
biological_process	GO:0050768	negative regulation of neurogenesis	3	69	402	39.51	0.64
biological_process	GO:0007520	myoblast fusion	3	71	402	38.4	0.64
cellular_component	GO:0035327	transcriptionally active chromatin	3	71	402	38.4	0.64
biological_process	GO:0032715	negative regulation of interleukin-6 production	3	72	402	37.86	0.64
biological_process	GO:0010243	response to organic nitrogen	3	73	402	37.34	0.64
molecular_function	GO:0008013	beta-catenin binding	4	231	402	15.74	0.64
biological_process	GO:0045184	establishment of protein localization	3	74	402	36.84	0.63
biological_process	GO:0035235	ionotropic glutamate receptor signaling pathway	3	76	402	35.87	0.63
biological_process	GO:0000080	G1 phase of mitotic cell cycle	3	78	402	34.95	0.63
cellular_component	GO:0005905	coated pit	3	78	402	34.95	0.63
biological_process	GO:0008306	associative learning	3	80	402	34.08	0.63
biological_process	GO:0006468	protein phosphorylation	19	2614	402	6.6	0.63
biological_process	GO:0001101	response to acid	3	82	402	33.25	0.62
biological_process	GO:0008015	blood circulation	3	82	402	33.25	0.62
biological_process	GO:0042130	negative regulation of T cell proliferation	3	87	402	31.33	0.62
biological_process	GO:0097190	apoptotic signaling pathway	3	87	402	31.33	0.62
biological_process	GO:0045071	negative regulation of viral genome replication	3	88	402	30.98	0.62
biological_process	GO:0048678	response to axon injury	3	93	402	29.31	0.61
biological_process	GO:0007595	lactation	3	96	402	28.4	0.61
cellular_component	GO:0030141	secretory granule	4	260	402	13.98	0.61
biological_process	GO:0006470	protein dephosphorylation	7	750	402	8.48	0.61
cellular_component	GO:0005634	nucleus	180	29242	402	5.59	0.61
biological_process	GO:0010977	negative regulation of neuron projection development	3	97	402	28.1	0.6
biological_process	GO:0050885	neuromuscular process controlling balance	3	99	402	27.54	0.6
biological_process	GO:0031290	retinal ganglion cell axon guidance	3	100	402	27.26	0.6
biological_process	GO:0010862	positive regulation of pathway-restricted SMAD protein phosphorylation	3	104	402	26.21	0.6
biological_process	GO:0000187	activation of MAPK activity	4	264	402	13.77	0.6
biological_process	GO:0000209	protein polyubiquitination	4	267	402	13.61	0.6
biological_process	GO:0006950	response to stress	7	765	402	8.31	0.6
cellular_component	GO:0031519	PcG protein complex	3	107	402	25.48	0.59
biological_process	GO:0031018	endocrine pancreas development	3	108	402	25.24	0.59
biological_process	GO:0071407	cellular response to organic cyclic compound	3	108	402	25.24	0.59
biological_process	GO:0045861	negative regulation of proteolysis	3	111	402	24.56	0.59
biological_process	GO:0008333	endosome to lysosome transport	3	112	402	24.34	0.59
biological_process	GO:0008286	insulin receptor signaling pathway	4	278	402	13.07	0.59
cellular_component	GO:0005730	nucleolus	35	5611	402	5.67	0.59
cellular_component	GO:0043198	dendritic shaft	3	115	402	23.71	0.58
biological_process	GO:0000186	activation of MAPKK activity	3	118	402	23.1	0.58
biological_process	GO:0006808	regulation of nitrogen utilization	3	122	402	22.35	0.58
molecular_function	GO:0008289	lipid binding	4	288	402	12.62	0.58
biological_process	GO:0006919	activation of cysteine-type endopeptidase activity involved in apoptotic process	4	292	402	12.45	0.58
biological_process	GO:0030336	negative regulation of cell migration	4	292	402	12.45	0.58
biological_process	GO:0007005	mitochondrion organization	4	294	402	12.36	0.58
cellular_component	GO:0030018	Z disc	4	297	402	12.24	0.58
molecular_function	GO:0008270	zinc ion binding	16	2366	402	6.15	0.58
biological_process	GO:0009410	response to xenobiotic stimulus	3	131	402	20.81	0.57
cellular_component	GO:0045177	apical part of cell	4	299	402	12.16	0.57
biological_process	GO:0030162	regulation of proteolysis	4	305	402	11.92	0.57
biological_process	GO:0007275	multicellular organismal development	5	475	402	9.57	0.57
biological_process	GO:0007399	nervous system development	6	648	402	8.41	0.57
molecular_function	GO:0005102	receptor binding	7	836	402	7.61	0.57
molecular_function	GO:0005546	phosphatidylinositol-4,5-bisphosphate binding	3	138	402	19.75	0.56
biological_process	GO:0016311	dephosphorylation	4	312	402	11.65	0.56
biological_process	GO:0051092	positive regulation of NF-kappaB transcription factor activity	4	326	402	11.15	0.55
biological_process	GO:0002237	response to molecule of bacterial origin	3	152	402	17.93	0.54
biological_process	GO:0046688	response to copper ion	3	152	402	17.93	0.54
biological_process	GO:0007613	memory	3	157	402	17.36	0.54
biological_process	GO:0019430	removal of superoxide radicals	3	159	402	17.15	0.54
cellular_component	GO:0030136	clathrin-coated vesicle	3	161	402	16.93	0.54
biological_process	GO:0010951	negative regulation of endopeptidase activity	4	337	402	10.79	0.54
biological_process	GO:0007596	blood coagulation	5	523	402	8.69	0.54
biological_process	GO:0051726	regulation of cell cycle	5	526	402	8.64	0.54
biological_process	GO:0010043	response to zinc ion	3	164	402	16.62	0.53
molecular_function	GO:0004721	phosphoprotein phosphatase activity	3	165	402	16.52	0.53
biological_process	GO:0050821	protein stabilization	4	354	402	10.27	0.53
biological_process	GO:0050832	defense response to fungus	5	541	402	8.4	0.53
biological_process	GO:0006954	inflammatory response	5	542	402	8.38	0.53
biological_process	GO:0007498	mesoderm development	3	173	402	15.76	0.52
biological_process	GO:0010923	negative regulation of phosphatase activity	3	178	402	15.32	0.52
biological_process	GO:0016337	cell-cell adhesion	4	376	402	9.67	0.52
biological_process	GO:0006955	immune response	5	570	402	7.97	0.52
biological_process	GO:0000084	S phase of mitotic cell cycle	3	184	402	14.82	0.51
biological_process	GO:0006378	mRNA polyadenylation	3	184	402	14.82	0.51
biological_process	GO:0007049	cell cycle	3	187	402	14.58	0.51
biological_process	GO:0007126	meiosis	4	394	402	9.23	0.51
cellular_component	GO:0031410	cytoplasmic vesicle	4	394	402	9.23	0.51
molecular_function	GO:0042803	protein homodimerization activity	18	3175	402	5.15	0.51
biological_process	GO:0002194	hepatocyte cell migration	2	2	402	908.7	0.5
biological_process	GO:0002316	follicular B cell differentiation	2	2	402	908.7	0.5
biological_process	GO:0002875	negative regulation of chronic inflammatory response to antigenic stimulus	2	2	402	908.7	0.5
biological_process	GO:0002930	trabecular meshwork development	2	2	402	908.7	0.5
biological_process	GO:0002932	tendon sheath development	2	2	402	908.7	0.5
biological_process	GO:0003243	circumferential growth involved in left ventricle morphogenesis	2	2	402	908.7	0.5
biological_process	GO:0003264	regulation of cardioblast proliferation	2	2	402	908.7	0.5
biological_process	GO:0003270	Notch signaling pathway involved in regulation of secondary heart field cardioblast proliferation	2	2	402	908.7	0.5
biological_process	GO:0003430	growth plate cartilage chondrocyte growth	2	2	402	908.7	0.5
biological_process	GO:0014013	regulation of gliogenesis	2	2	402	908.7	0.5
biological_process	GO:0014807	regulation of somitogenesis	2	2	402	908.7	0.5
biological_process	GO:0014858	positive regulation of skeletal muscle cell proliferation	2	2	402	908.7	0.5
biological_process	GO:0021502	neural fold elevation formation	2	2	402	908.7	0.5
biological_process	GO:0021629	olfactory nerve structural organization	2	2	402	908.7	0.5
biological_process	GO:0021837	motogenic signaling involved in postnatal olfactory bulb interneuron migration	2	2	402	908.7	0.5
biological_process	GO:0021902	commitment of neuronal cell to specific neuron type in forebrain	2	2	402	908.7	0.5
biological_process	GO:0021918	regulation of transcription from RNA polymerase II promoter involved in somatic motor neuron fate commitment	2	2	402	908.7	0.5
biological_process	GO:0022018	lateral ganglionic eminence cell proliferation	2	2	402	908.7	0.5
biological_process	GO:0030886	negative regulation of myeloid dendritic cell activation	2	2	402	908.7	0.5
biological_process	GO:0033028	myeloid cell apoptotic process	2	2	402	908.7	0.5
biological_process	GO:0034104	negative regulation of tissue remodeling	2	2	402	908.7	0.5
biological_process	GO:0035112	genitalia morphogenesis	2	2	402	908.7	0.5
biological_process	GO:0035849	nephric duct elongation	2	2	402	908.7	0.5
biological_process	GO:0035852	horizontal cell localization	2	2	402	908.7	0.5
biological_process	GO:0042512	negative regulation of tyrosine phosphorylation of Stat1 protein	2	2	402	908.7	0.5
biological_process	GO:0043375	CD8-positive, alpha-beta T cell lineage commitment	2	2	402	908.7	0.5
biological_process	GO:0045607	regulation of auditory receptor cell differentiation	2	2	402	908.7	0.5
biological_process	GO:0051651	maintenance of location in cell	2	2	402	908.7	0.5
biological_process	GO:0060165	regulation of timing of subpallium neuron differentiation	2	2	402	908.7	0.5
biological_process	GO:0060366	lambdoid suture morphogenesis	2	2	402	908.7	0.5
biological_process	GO:0060367	sagittal suture morphogenesis	2	2	402	908.7	0.5
biological_process	GO:0060436	bronchiole morphogenesis	2	2	402	908.7	0.5
biological_process	GO:0060458	right lung development	2	2	402	908.7	0.5
biological_process	GO:0060459	left lung development	2	2	402	908.7	0.5
biological_process	GO:0060464	lung lobe formation	2	2	402	908.7	0.5
biological_process	GO:0060496	mesenchymal-epithelial cell signaling involved in lung development	2	2	402	908.7	0.5
biological_process	GO:0060516	primary prostatic bud elongation	2	2	402	908.7	0.5
biological_process	GO:0060520	activation of prostate induction by androgen receptor signaling pathway	2	2	402	908.7	0.5
biological_process	GO:0060592	mammary gland formation	2	2	402	908.7	0.5
biological_process	GO:0060649	mammary gland bud elongation	2	2	402	908.7	0.5
biological_process	GO:0060659	nipple sheath formation	2	2	402	908.7	0.5
biological_process	GO:0060782	regulation of mesenchymal cell proliferation involved in prostate gland development	2	2	402	908.7	0.5
biological_process	GO:0060783	mesenchymal smoothened signaling pathway involved in prostate gland development	2	2	402	908.7	0.5
biological_process	GO:0060873	anterior semicircular canal development	2	2	402	908.7	0.5
biological_process	GO:0060875	lateral semicircular canal development	2	2	402	908.7	0.5
biological_process	GO:0060879	semicircular canal fusion	2	2	402	908.7	0.5
biological_process	GO:0061100	lung neuroendocrine cell differentiation	2	2	402	908.7	0.5
biological_process	GO:0061102	stomach neuroendocrine cell differentiation	2	2	402	908.7	0.5
biological_process	GO:0061103	carotid body glomus cell differentiation	2	2	402	908.7	0.5
biological_process	GO:0061104	adrenal chromaffin cell differentiation	2	2	402	908.7	0.5
biological_process	GO:0061115	lung proximal/distal axis specification	2	2	402	908.7	0.5
biological_process	GO:0061197	fungiform papilla morphogenesis	2	2	402	908.7	0.5
biological_process	GO:0061344	regulation of cell adhesion involved in heart morphogenesis	2	2	402	908.7	0.5
biological_process	GO:0070352	positive regulation of white fat cell proliferation	2	2	402	908.7	0.5
biological_process	GO:0071335	hair follicle cell proliferation	2	2	402	908.7	0.5
biological_process	GO:0071678	olfactory bulb axon guidance	2	2	402	908.7	0.5
biological_process	GO:0072161	mesenchymal cell differentiation involved in kidney development	2	2	402	908.7	0.5
biological_process	GO:0072574	hepatocyte proliferation	2	2	402	908.7	0.5
biological_process	GO:0080125	multicellular structure septum development	2	2	402	908.7	0.5
biological_process	GO:0090275	negative regulation of somatostatin secretion	2	2	402	908.7	0.5
biological_process	GO:2000630	positive regulation of miRNA metabolic process	2	2	402	908.7	0.5
biological_process	GO:2001012	mesenchymal cell differentiation involved in renal system development	2	2	402	908.7	0.5
biological_process	GO:2001052	positive regulation of G1/S transition checkpoint	2	2	402	908.7	0.5
cellular_component	GO:0034752	cytosolic aryl hydrocarbon receptor complex	2	2	402	908.7	0.5
molecular_function	GO:0019982	interleukin-7 binding	2	2	402	908.7	0.5
molecular_function	GO:0031856	parathyroid hormone receptor binding	2	2	402	908.7	0.5
molecular_function	GO:0070974	POU domain binding	2	2	402	908.7	0.5
biological_process	GO:0001712	ectodermal cell fate commitment	2	3	402	605.8	0.5
biological_process	GO:0001999	renal response to blood flow involved in circulatory renin-angiotensin regulation of systemic arterial blood pressure	2	3	402	605.8	0.5
biological_process	GO:0003186	tricuspid valve morphogenesis	2	3	402	605.8	0.5
biological_process	GO:0003213	cardiac right atrium morphogenesis	2	3	402	605.8	0.5
biological_process	GO:0003322	pancreatic A cell development	2	3	402	605.8	0.5
biological_process	GO:0003359	noradrenergic neuron fate commitment	2	3	402	605.8	0.5
biological_process	GO:0007371	ventral midline determination	2	3	402	605.8	0.5
biological_process	GO:0014813	satellite cell commitment	2	3	402	605.8	0.5
biological_process	GO:0014873	response to muscle activity involved in regulation of muscle adaptation	2	3	402	605.8	0.5
biological_process	GO:0021610	facial nerve morphogenesis	2	3	402	605.8	0.5
biological_process	GO:0021905	forebrain-midbrain boundary formation	2	3	402	605.8	0.5
biological_process	GO:0032460	negative regulation of protein oligomerization	2	3	402	605.8	0.5
biological_process	GO:0032805	positive regulation of low-density lipoprotein particle receptor catabolic process	2	3	402	605.8	0.5
biological_process	GO:0032912	negative regulation of transforming growth factor beta2 production	2	3	402	605.8	0.5
biological_process	GO:0042414	epinephrine metabolic process	2	3	402	605.8	0.5
biological_process	GO:0043369	CD4-positive or CD8-positive, alpha-beta T cell lineage commitment	2	3	402	605.8	0.5
biological_process	GO:0046838	phosphorylated carbohydrate dephosphorylation	2	3	402	605.8	0.5
biological_process	GO:0046877	regulation of saliva secretion	2	3	402	605.8	0.5
biological_process	GO:0048820	hair follicle maturation	2	3	402	605.8	0.5
biological_process	GO:0051542	elastin biosynthetic process	2	3	402	605.8	0.5
biological_process	GO:0055020	positive regulation of cardiac muscle fiber development	2	3	402	605.8	0.5
biological_process	GO:0060248	detection of cell density by contact stimulus involved in contact inhibition	2	3	402	605.8	0.5
biological_process	GO:0060502	epithelial cell proliferation involved in lung morphogenesis	2	3	402	605.8	0.5
biological_process	GO:0060503	bud dilation involved in lung branching	2	3	402	605.8	0.5
biological_process	GO:0060534	trachea cartilage development	2	3	402	605.8	0.5
biological_process	GO:0060661	submandibular salivary gland formation	2	3	402	605.8	0.5
biological_process	GO:0060843	venous endothelial cell differentiation	2	3	402	605.8	0.5
biological_process	GO:0060844	arterial endothelial cell fate commitment	2	3	402	605.8	0.5
biological_process	GO:0061189	positive regulation of sclerotome development	2	3	402	605.8	0.5
biological_process	GO:0061384	heart trabecula morphogenesis	2	3	402	605.8	0.5
biological_process	GO:0070173	regulation of enamel mineralization	2	3	402	605.8	0.5
biological_process	GO:0070242	thymocyte apoptotic process	2	3	402	605.8	0.5
biological_process	GO:0071027	nuclear RNA surveillance	2	3	402	605.8	0.5
biological_process	GO:0071615	oxidative deethylation	2	3	402	605.8	0.5
biological_process	GO:0072285	mesenchymal to epithelial transition involved in metanephric renal vesicle formation	2	3	402	605.8	0.5
biological_process	GO:0072366	regulation of cellular ketone metabolic process by positive regulation of transcription from RNA polymerase II promoter	2	3	402	605.8	0.5
biological_process	GO:0090096	positive regulation of metanephric cap mesenchymal cell proliferation	2	3	402	605.8	0.5
biological_process	GO:0097101	blood vessel endothelial cell fate specification	2	3	402	605.8	0.5
biological_process	GO:1901186	positive regulation of ERBB signaling pathway	2	3	402	605.8	0.5
biological_process	GO:1901201	regulation of extracellular matrix assembly	2	3	402	605.8	0.5
biological_process	GO:1901258	positive regulation of macrophage colony-stimulating factor production	2	3	402	605.8	0.5
biological_process	GO:2000062	negative regulation of ureter smooth muscle cell differentiation	2	3	402	605.8	0.5
biological_process	GO:2000063	positive regulation of ureter smooth muscle cell differentiation	2	3	402	605.8	0.5
biological_process	GO:2000137	negative regulation of cell proliferation involved in heart morphogenesis	2	3	402	605.8	0.5
biological_process	GO:2000357	negative regulation of kidney smooth muscle cell differentiation	2	3	402	605.8	0.5
biological_process	GO:2000358	positive regulation of kidney smooth muscle cell differentiation	2	3	402	605.8	0.5
biological_process	GO:2000826	regulation of heart morphogenesis	2	3	402	605.8	0.5
biological_process	GO:2000971	negative regulation of detection of glucose	2	3	402	605.8	0.5
biological_process	GO:2000976	regulation of transcription from RNA polymerase II promoter involved in detection of glucose	2	3	402	605.8	0.5
biological_process	GO:2001220	negative regulation of G2 phase of mitotic cell cycle	2	3	402	605.8	0.5
cellular_component	GO:0005585	collagen type II	2	3	402	605.8	0.5
molecular_function	GO:0005035	death receptor activity	2	3	402	605.8	0.5
molecular_function	GO:0031703	type 2 angiotensin receptor binding	2	3	402	605.8	0.5
molecular_function	GO:0070678	preprotein binding	2	3	402	605.8	0.5
biological_process	GO:0001998	angiotensin mediated vasoconstriction involved in regulation of systemic arterial blood pressure	2	4	402	454.35	0.5
biological_process	GO:0002763	positive regulation of myeloid leukocyte differentiation	2	4	402	454.35	0.5
biological_process	GO:0006576	cellular biogenic amine metabolic process	2	4	402	454.35	0.5
biological_process	GO:0019230	proprioception	2	4	402	454.35	0.5
biological_process	GO:0021511	spinal cord patterning	2	4	402	454.35	0.5
biological_process	GO:0021544	subpallium development	2	4	402	454.35	0.5
biological_process	GO:0021747	cochlear nucleus development	2	4	402	454.35	0.5
biological_process	GO:0021750	vestibular nucleus development	2	4	402	454.35	0.5
biological_process	GO:0021910	smoothened signaling pathway involved in ventral spinal cord patterning	2	4	402	454.35	0.5
biological_process	GO:0035411	catenin import into nucleus	2	4	402	454.35	0.5
biological_process	GO:0036304	umbilical cord morphogenesis	2	4	402	454.35	0.5
biological_process	GO:0045605	negative regulation of epidermal cell differentiation	2	4	402	454.35	0.5
biological_process	GO:0048378	regulation of lateral mesodermal cell fate specification	2	4	402	454.35	0.5
biological_process	GO:0048713	regulation of oligodendrocyte differentiation	2	4	402	454.35	0.5
biological_process	GO:0048753	pigment granule organization	2	4	402	454.35	0.5
biological_process	GO:0050432	catecholamine secretion	2	4	402	454.35	0.5
biological_process	GO:0050973	detection of mechanical stimulus involved in equilibrioception	2	4	402	454.35	0.5
biological_process	GO:0060163	subpallium neuron fate commitment	2	4	402	454.35	0.5
biological_process	GO:0060574	intestinal epithelial cell maturation	2	4	402	454.35	0.5
biological_process	GO:0060809	mesodermal to mesenchymal transition involved in gastrulation	2	4	402	454.35	0.5
biological_process	GO:0061005	cell differentiation involved in kidney development	2	4	402	454.35	0.5
biological_process	GO:0061113	pancreas morphogenesis	2	4	402	454.35	0.5
biological_process	GO:0061196	fungiform papilla development	2	4	402	454.35	0.5
biological_process	GO:0070075	tear secretion	2	4	402	454.35	0.5
biological_process	GO:0070094	positive regulation of glucagon secretion	2	4	402	454.35	0.5
biological_process	GO:0070447	positive regulation of oligodendrocyte progenitor proliferation	2	4	402	454.35	0.5
biological_process	GO:0072148	epithelial cell fate commitment	2	4	402	454.35	0.5
biological_process	GO:1900180	regulation of protein localization to nucleus	2	4	402	454.35	0.5
biological_process	GO:2001212	regulation of vasculogenesis	2	4	402	454.35	0.5
biological_process	GO:2001234	negative regulation of apoptotic signaling pathway	2	4	402	454.35	0.5
cellular_component	GO:0071664	catenin-TCF7L2 complex	2	4	402	454.35	0.5
cellular_component	GO:0000151	ubiquitin ligase complex	3	196	402	13.91	0.5
cellular_component	GO:0001726	ruffle	3	204	402	13.36	0.5
biological_process	GO:0007218	neuropeptide signaling pathway	3	205	402	13.3	0.5
cellular_component	GO:0005737	cytoplasm	107	21194	402	4.59	0.5
biological_process	GO:0002082	regulation of oxidative phosphorylation	2	5	402	363.48	0.49
biological_process	GO:0002302	CD8-positive, alpha-beta T cell differentiation involved in immune response	2	5	402	363.48	0.49
biological_process	GO:0002520	immune system development	2	5	402	363.48	0.49
biological_process	GO:0003162	atrioventricular node development	2	5	402	363.48	0.49
biological_process	GO:0003290	atrial septum secundum morphogenesis	2	5	402	363.48	0.49
biological_process	GO:0006782	protoporphyrinogen IX biosynthetic process	2	5	402	363.48	0.49
biological_process	GO:0010071	root meristem specification	2	5	402	363.48	0.49
biological_process	GO:0010559	regulation of glycoprotein biosynthetic process	2	5	402	363.48	0.49
biological_process	GO:0010767	regulation of transcription from RNA polymerase II promoter in response to UV-induced DNA damage	2	5	402	363.48	0.49
biological_process	GO:0014042	positive regulation of neuron maturation	2	5	402	363.48	0.49
biological_process	GO:0021561	facial nerve development	2	5	402	363.48	0.49
biological_process	GO:0021773	striatal medium spiny neuron differentiation	2	5	402	363.48	0.49
biological_process	GO:0021801	cerebral cortex radial glia guided migration	2	5	402	363.48	0.49
biological_process	GO:0035607	fibroblast growth factor receptor signaling pathway involved in orbitofrontal cortex development	2	5	402	363.48	0.49
biological_process	GO:0042488	positive regulation of odontogenesis of dentin-containing tooth	2	5	402	363.48	0.49
biological_process	GO:0046631	alpha-beta T cell activation	2	5	402	363.48	0.49
biological_process	GO:0048743	positive regulation of skeletal muscle fiber development	2	5	402	363.48	0.49
biological_process	GO:0050677	positive regulation of urothelial cell proliferation	2	5	402	363.48	0.49
biological_process	GO:0060266	negative regulation of respiratory burst involved in inflammatory response	2	5	402	363.48	0.49
biological_process	GO:0060433	bronchus development	2	5	402	363.48	0.49
biological_process	GO:0060615	mammary gland bud formation	2	5	402	363.48	0.49
biological_process	GO:0060623	regulation of chromosome condensation	2	5	402	363.48	0.49
biological_process	GO:0060633	negative regulation of transcription initiation from RNA polymerase II promoter	2	5	402	363.48	0.49
biological_process	GO:0061324	canonical Wnt receptor signaling pathway involved in positive regulation of cardiac outflow tract cell proliferation	2	5	402	363.48	0.49
biological_process	GO:0071338	positive regulation of hair follicle cell proliferation	2	5	402	363.48	0.49
biological_process	GO:0090074	negative regulation of protein homodimerization activity	2	5	402	363.48	0.49
biological_process	GO:1901216	positive regulation of neuron death	2	5	402	363.48	0.49
biological_process	GO:2000564	regulation of CD8-positive, alpha-beta T cell proliferation	2	5	402	363.48	0.49
biological_process	GO:2000615	regulation of histone H3-K9 acetylation	2	5	402	363.48	0.49
cellular_component	GO:0034750	Scrib-APC-beta-catenin complex	2	5	402	363.48	0.49
molecular_function	GO:0004874	aryl hydrocarbon receptor activity	2	5	402	363.48	0.49
molecular_function	GO:0005135	interleukin-3 receptor binding	2	5	402	363.48	0.49
molecular_function	GO:0055105	ubiquitin-protein ligase inhibitor activity	2	5	402	363.48	0.49
biological_process	GO:0001543	ovarian follicle rupture	2	6	402	302.9	0.49
biological_process	GO:0002019	regulation of renal output by angiotensin	2	6	402	302.9	0.49
biological_process	GO:0003169	coronary vein morphogenesis	2	6	402	302.9	0.49
biological_process	GO:0003171	atrioventricular valve development	2	6	402	302.9	0.49
biological_process	GO:0003207	cardiac chamber formation	2	6	402	302.9	0.49
biological_process	GO:0003241	growth involved in heart morphogenesis	2	6	402	302.9	0.49
biological_process	GO:0010070	zygote asymmetric cell division	2	6	402	302.9	0.49
biological_process	GO:0010454	negative regulation of cell fate commitment	2	6	402	302.9	0.49
biological_process	GO:0010523	negative regulation of calcium ion transport into cytosol	2	6	402	302.9	0.49
biological_process	GO:0014904	myotube cell development	2	6	402	302.9	0.49
biological_process	GO:0021530	spinal cord oligodendrocyte cell fate specification	2	6	402	302.9	0.49
biological_process	GO:0021776	smoothened signaling pathway involved in spinal cord motor neuron cell fate specification	2	6	402	302.9	0.49
biological_process	GO:0021912	regulation of transcription from RNA polymerase II promoter involved in spinal cord motor neuron fate specification	2	6	402	302.9	0.49
biological_process	GO:0031061	negative regulation of histone methylation	2	6	402	302.9	0.49
biological_process	GO:0032730	positive regulation of interleukin-1 alpha production	2	6	402	302.9	0.49
biological_process	GO:0032911	negative regulation of transforming growth factor beta1 production	2	6	402	302.9	0.49
biological_process	GO:0033132	negative regulation of glucokinase activity	2	6	402	302.9	0.49
biological_process	GO:0033861	negative regulation of NAD(P)H oxidase activity	2	6	402	302.9	0.49
biological_process	GO:0043368	positive T cell selection	2	6	402	302.9	0.49
biological_process	GO:0043549	regulation of kinase activity	2	6	402	302.9	0.49
biological_process	GO:0044336	canonical Wnt receptor signaling pathway involved in negative regulation of apoptotic process	2	6	402	302.9	0.49
biological_process	GO:0045818	negative regulation of glycogen catabolic process	2	6	402	302.9	0.49
biological_process	GO:0046605	regulation of centrosome cycle	2	6	402	302.9	0.49
biological_process	GO:0046671	negative regulation of retinal cell programmed cell death	2	6	402	302.9	0.49
biological_process	GO:0048087	positive regulation of developmental pigmentation	2	6	402	302.9	0.49
biological_process	GO:0048144	fibroblast proliferation	2	6	402	302.9	0.49
biological_process	GO:0048392	intermediate mesodermal cell differentiation	2	6	402	302.9	0.49
biological_process	GO:0048553	negative regulation of metalloenzyme activity	2	6	402	302.9	0.49
biological_process	GO:0048852	diencephalon morphogenesis	2	6	402	302.9	0.49
biological_process	GO:0051154	negative regulation of striated muscle cell differentiation	2	6	402	302.9	0.49
biological_process	GO:0060020	Bergmann glial cell differentiation	2	6	402	302.9	0.49
biological_process	GO:0060166	olfactory pit development	2	6	402	302.9	0.49
biological_process	GO:0060479	lung cell differentiation	2	6	402	302.9	0.49
biological_process	GO:0060595	fibroblast growth factor receptor signaling pathway involved in mammary gland specification	2	6	402	302.9	0.49
biological_process	GO:0060599	lateral sprouting involved in mammary gland duct morphogenesis	2	6	402	302.9	0.49
biological_process	GO:0060667	branch elongation involved in salivary gland morphogenesis	2	6	402	302.9	0.49
biological_process	GO:0060915	mesenchymal cell differentiation involved in lung development	2	6	402	302.9	0.49
biological_process	GO:0061033	secretion by lung epithelial cell involved in lung growth	2	6	402	302.9	0.49
biological_process	GO:0072097	negative regulation of branch elongation involved in ureteric bud branching by BMP signaling pathway	2	6	402	302.9	0.49
biological_process	GO:0072101	specification of ureteric bud anterior/posterior symmetry by BMP signaling pathway	2	6	402	302.9	0.49
biological_process	GO:0072363	regulation of glycolysis by positive regulation of transcription from RNA polymerase II promoter	2	6	402	302.9	0.49
biological_process	GO:0072369	regulation of lipid transport by positive regulation of transcription from RNA polymerase II promoter	2	6	402	302.9	0.49
biological_process	GO:0072513	positive regulation of secondary heart field cardioblast proliferation	2	6	402	302.9	0.49
biological_process	GO:0090194	negative regulation of glomerulus development	2	6	402	302.9	0.49
biological_process	GO:1900273	positive regulation of long-term synaptic potentiation	2	6	402	302.9	0.49
biological_process	GO:2000052	positive regulation of non-canonical Wnt receptor signaling pathway	2	6	402	302.9	0.49
biological_process	GO:2000254	regulation of male germ cell proliferation	2	6	402	302.9	0.49
biological_process	GO:2000820	negative regulation of transcription from RNA polymerase II promoter involved in smooth muscle cell differentiation	2	6	402	302.9	0.49
molecular_function	GO:0050649	testosterone 6-beta-hydroxylase activity	2	6	402	302.9	0.49
molecular_function	GO:0051718	DNA (cytosine-5-)-methyltransferase activity, acting on CpG substrates	2	6	402	302.9	0.49
biological_process	GO:0002376	immune system process	2	7	402	259.63	0.49
biological_process	GO:0003051	angiotensin-mediated drinking behavior	2	7	402	259.63	0.49
biological_process	GO:0003199	endocardial cushion to mesenchymal transition involved in heart valve formation	2	7	402	259.63	0.49
biological_process	GO:0003229	ventricular cardiac muscle tissue development	2	7	402	259.63	0.49
biological_process	GO:0003331	positive regulation of extracellular matrix constituent secretion	2	7	402	259.63	0.49
biological_process	GO:0010092	specification of organ identity	2	7	402	259.63	0.49
biological_process	GO:0010453	regulation of cell fate commitment	2	7	402	259.63	0.49
biological_process	GO:0018205	peptidyl-lysine modification	2	7	402	259.63	0.49
biological_process	GO:0021524	visceral motor neuron differentiation	2	7	402	259.63	0.49
biological_process	GO:0021775	smoothened signaling pathway involved in ventral spinal cord interneuron specification	2	7	402	259.63	0.49
biological_process	GO:0021847	ventricular zone neuroblast division	2	7	402	259.63	0.49
biological_process	GO:0032848	negative regulation of cellular pH reduction	2	7	402	259.63	0.49
biological_process	GO:0035441	cell migration involved in vasculogenesis	2	7	402	259.63	0.49
biological_process	GO:0036302	atrioventricular canal development	2	7	402	259.63	0.49
biological_process	GO:0045636	positive regulation of melanocyte differentiation	2	7	402	259.63	0.49
biological_process	GO:0046534	positive regulation of photoreceptor cell differentiation	2	7	402	259.63	0.49
biological_process	GO:0048807	female genitalia morphogenesis	2	7	402	259.63	0.49
biological_process	GO:0048880	sensory system development	2	7	402	259.63	0.49
biological_process	GO:0060364	frontal suture morphogenesis	2	7	402	259.63	0.49
biological_process	GO:0061149	BMP signaling pathway involved in ureter morphogenesis	2	7	402	259.63	0.49
biological_process	GO:0061151	BMP signaling pathway involved in renal system segmentation	2	7	402	259.63	0.49
biological_process	GO:0061155	pulmonary artery endothelial tube morphogenesis	2	7	402	259.63	0.49
biological_process	GO:0071893	BMP signaling pathway involved in nephric duct formation	2	7	402	259.63	0.49
biological_process	GO:0072104	glomerular capillary formation	2	7	402	259.63	0.49
biological_process	GO:0072192	ureter epithelial cell differentiation	2	7	402	259.63	0.49
biological_process	GO:0072200	negative regulation of mesenchymal cell proliferation involved in ureter development	2	7	402	259.63	0.49
biological_process	GO:2000005	negative regulation of metanephric S-shaped body morphogenesis	2	7	402	259.63	0.49
biological_process	GO:2000007	negative regulation of metanephric comma-shaped body morphogenesis	2	7	402	259.63	0.49
biological_process	GO:2000105	positive regulation of DNA-dependent DNA replication	2	7	402	259.63	0.49
molecular_function	GO:0035033	histone deacetylase regulator activity	2	7	402	259.63	0.49
molecular_function	GO:0070325	lipoprotein particle receptor binding	2	7	402	259.63	0.49
molecular_function	GO:0070851	growth factor receptor binding	2	7	402	259.63	0.49
biological_process	GO:0001976	neurological system process involved in regulation of systemic arterial blood pressure	2	8	402	227.18	0.49
biological_process	GO:0003273	cell migration involved in endocardial cushion formation	2	8	402	227.18	0.49
biological_process	GO:0009820	alkaloid metabolic process	2	8	402	227.18	0.49
biological_process	GO:0010078	maintenance of root meristem identity	2	8	402	227.18	0.49
biological_process	GO:0010838	positive regulation of keratinocyte proliferation	2	8	402	227.18	0.49
biological_process	GO:0016048	detection of temperature stimulus	2	8	402	227.18	0.49
biological_process	GO:0019102	male somatic sex determination	2	8	402	227.18	0.49
biological_process	GO:0021913	regulation of transcription from RNA polymerase II promoter involved in ventral spinal cord interneuron specification	2	8	402	227.18	0.49
biological_process	GO:0021940	positive regulation of cerebellar granule cell precursor proliferation	2	8	402	227.18	0.49
biological_process	GO:0022405	hair cycle process	2	8	402	227.18	0.49
biological_process	GO:0032289	central nervous system myelin formation	2	8	402	227.18	0.49
biological_process	GO:0032831	positive regulation of CD4-positive, CD25-positive, alpha-beta regulatory T cell differentiation	2	8	402	227.18	0.49
biological_process	GO:0033026	negative regulation of mast cell apoptotic process	2	8	402	227.18	0.49
biological_process	GO:0034124	regulation of MyD88-dependent toll-like receptor signaling pathway	2	8	402	227.18	0.49
biological_process	GO:0035295	tube development	2	8	402	227.18	0.49
biological_process	GO:0042660	positive regulation of cell fate specification	2	8	402	227.18	0.49
biological_process	GO:0043374	CD8-positive, alpha-beta T cell differentiation	2	8	402	227.18	0.49
biological_process	GO:0046499	S-adenosylmethioninamine metabolic process	2	8	402	227.18	0.49
biological_process	GO:0046602	regulation of mitotic centrosome separation	2	8	402	227.18	0.49
biological_process	GO:0060058	positive regulation of apoptotic process involved in mammary gland involution	2	8	402	227.18	0.49
biological_process	GO:0060449	bud elongation involved in lung branching	2	8	402	227.18	0.49
biological_process	GO:0060513	prostatic bud formation	2	8	402	227.18	0.49
biological_process	GO:0060523	prostate epithelial cord elongation	2	8	402	227.18	0.49
biological_process	GO:0060571	morphogenesis of an epithelial fold	2	8	402	227.18	0.49
biological_process	GO:0060718	chorionic trophoblast cell differentiation	2	8	402	227.18	0.49
biological_process	GO:2000138	positive regulation of cell proliferation involved in heart morphogenesis	2	8	402	227.18	0.49
cellular_component	GO:0030055	cell-substrate junction	2	8	402	227.18	0.49
molecular_function	GO:0019976	interleukin-2 binding	2	8	402	227.18	0.49
molecular_function	GO:0031701	angiotensin receptor binding	2	8	402	227.18	0.49
molecular_function	GO:0043121	neurotrophin binding	2	8	402	227.18	0.49
biological_process	GO:0003150	muscular septum morphogenesis	2	9	402	201.93	0.49
biological_process	GO:0003219	cardiac right ventricle formation	2	9	402	201.93	0.49
biological_process	GO:0003334	keratinocyte development	2	9	402	201.93	0.49
biological_process	GO:0010837	regulation of keratinocyte proliferation	2	9	402	201.93	0.49
biological_process	GO:0010871	negative regulation of receptor biosynthetic process	2	9	402	201.93	0.49
biological_process	GO:0014051	gamma-aminobutyric acid secretion	2	9	402	201.93	0.49
biological_process	GO:0014706	striated muscle tissue development	2	9	402	201.93	0.49
biological_process	GO:0021521	ventral spinal cord interneuron specification	2	9	402	201.93	0.49
biological_process	GO:0021529	spinal cord oligodendrocyte cell differentiation	2	9	402	201.93	0.49
biological_process	GO:0021800	cerebral cortex tangential migration	2	9	402	201.93	0.49
biological_process	GO:0021903	rostrocaudal neural tube patterning	2	9	402	201.93	0.49
biological_process	GO:0032048	cardiolipin metabolic process	2	9	402	201.93	0.49
biological_process	GO:0034447	very-low-density lipoprotein particle clearance	2	9	402	201.93	0.49
biological_process	GO:0035813	regulation of renal sodium excretion	2	9	402	201.93	0.49
biological_process	GO:0035910	ascending aorta morphogenesis	2	9	402	201.93	0.49
biological_process	GO:0035992	tendon formation	2	9	402	201.93	0.49
biological_process	GO:0036023	embryonic skeletal limb joint morphogenesis	2	9	402	201.93	0.49
biological_process	GO:0038026	reelin-mediated signaling pathway	2	9	402	201.93	0.49
biological_process	GO:0042159	lipoprotein catabolic process	2	9	402	201.93	0.49
biological_process	GO:0045726	positive regulation of integrin biosynthetic process	2	9	402	201.93	0.49
biological_process	GO:0045922	negative regulation of fatty acid metabolic process	2	9	402	201.93	0.49
biological_process	GO:0048638	regulation of developmental growth	2	9	402	201.93	0.49
biological_process	GO:0048859	formation of anatomical boundary	2	9	402	201.93	0.49
biological_process	GO:0050674	urothelial cell proliferation	2	9	402	201.93	0.49
biological_process	GO:0060743	epithelial cell maturation involved in prostate gland development	2	9	402	201.93	0.49
biological_process	GO:0061009	common bile duct development	2	9	402	201.93	0.49
biological_process	GO:0070668	positive regulation of mast cell proliferation	2	9	402	201.93	0.49
biological_process	GO:0071539	protein localization to centrosome	2	9	402	201.93	0.49
biological_process	GO:0072079	nephron tubule formation	2	9	402	201.93	0.49
biological_process	GO:0072091	regulation of stem cell proliferation	2	9	402	201.93	0.49
biological_process	GO:0072554	blood vessel lumenization	2	9	402	201.93	0.49
biological_process	GO:2000969	positive regulation of alpha-amino-3-hydroxy-5-methyl-4-isoxazole propionate selective glutamate receptor activity	2	9	402	201.93	0.49
cellular_component	GO:0005899	insulin receptor complex	2	9	402	201.93	0.49
molecular_function	GO:0010385	double-stranded methylated DNA binding	2	9	402	201.93	0.49
molecular_function	GO:0010698	acetyltransferase activator activity	2	9	402	201.93	0.49
molecular_function	GO:0032767	copper-dependent protein binding	2	9	402	201.93	0.49
molecular_function	GO:0035939	microsatellite binding	2	9	402	201.93	0.49
molecular_function	GO:0046848	hydroxyapatite binding	2	9	402	201.93	0.49
molecular_function	GO:0046911	metal chelating activity	2	9	402	201.93	0.49
biological_process	GO:0001991	regulation of systemic arterial blood pressure by circulatory renin-angiotensin	2	10	402	181.74	0.49
biological_process	GO:0002018	renin-angiotensin regulation of aldosterone production	2	10	402	181.74	0.49
biological_process	GO:0002090	regulation of receptor internalization	2	10	402	181.74	0.49
biological_process	GO:0003209	cardiac atrium morphogenesis	2	10	402	181.74	0.49
biological_process	GO:0003310	pancreatic A cell differentiation	2	10	402	181.74	0.49
biological_process	GO:0007502	digestive tract mesoderm development	2	10	402	181.74	0.49
biological_process	GO:0014010	Schwann cell proliferation	2	10	402	181.74	0.49
biological_process	GO:0014061	regulation of norepinephrine secretion	2	10	402	181.74	0.49
biological_process	GO:0021860	pyramidal neuron development	2	10	402	181.74	0.49
biological_process	GO:0032787	monocarboxylic acid metabolic process	2	10	402	181.74	0.49
biological_process	GO:0032959	inositol trisphosphate biosynthetic process	2	10	402	181.74	0.49
biological_process	GO:0035726	common myeloid progenitor cell proliferation	2	10	402	181.74	0.49
biological_process	GO:0042245	RNA repair	2	10	402	181.74	0.49
biological_process	GO:0046058	cAMP metabolic process	2	10	402	181.74	0.49
biological_process	GO:0046825	regulation of protein export from nucleus	2	10	402	181.74	0.49
biological_process	GO:0048143	astrocyte activation	2	10	402	181.74	0.49
biological_process	GO:0051563	smooth endoplasmic reticulum calcium ion homeostasis	2	10	402	181.74	0.49
biological_process	GO:0060019	radial glial cell differentiation	2	10	402	181.74	0.49
biological_process	GO:0060043	regulation of cardiac muscle cell proliferation	2	10	402	181.74	0.49
biological_process	GO:0060267	positive regulation of respiratory burst	2	10	402	181.74	0.49
biological_process	GO:0060512	prostate gland morphogenesis	2	10	402	181.74	0.49
biological_process	GO:0060662	salivary gland cavitation	2	10	402	181.74	0.49
biological_process	GO:0060748	tertiary branching involved in mammary gland duct morphogenesis	2	10	402	181.74	0.49
biological_process	GO:0072182	regulation of nephron tubule epithelial cell differentiation	2	10	402	181.74	0.49
biological_process	GO:0090045	positive regulation of deacetylase activity	2	10	402	181.74	0.49
biological_process	GO:0090116	C-5 methylation of cytosine	2	10	402	181.74	0.49
biological_process	GO:0097114	N-methyl-D-aspartate receptor clustering	2	10	402	181.74	0.49
biological_process	GO:2000252	negative regulation of feeding behavior	2	10	402	181.74	0.49
biological_process	GO:2001054	negative regulation of mesenchymal cell apoptotic process	2	10	402	181.74	0.49
biological_process	GO:2001275	positive regulation of glucose import in response to insulin stimulus	2	10	402	181.74	0.49
cellular_component	GO:0044294	dendritic growth cone	2	10	402	181.74	0.49
molecular_function	GO:0034875	caffeine oxidase activity	2	10	402	181.74	0.49
molecular_function	GO:0035402	histone kinase activity (H3-T11 specific)	2	10	402	181.74	0.49
biological_process	GO:0000432	positive regulation of transcription from RNA polymerase II promoter by glucose	2	11	402	165.22	0.49
biological_process	GO:0001832	blastocyst growth	2	11	402	165.22	0.49
biological_process	GO:0003289	atrial septum primum morphogenesis	2	11	402	165.22	0.49
biological_process	GO:0006570	tyrosine metabolic process	2	11	402	165.22	0.49
biological_process	GO:0007500	mesodermal cell fate determination	2	11	402	165.22	0.49
biological_process	GO:0015760	glucose-6-phosphate transport	2	11	402	165.22	0.49
biological_process	GO:0031063	regulation of histone deacetylation	2	11	402	165.22	0.49
biological_process	GO:0033153	T cell receptor V(D)J recombination	2	11	402	165.22	0.49
biological_process	GO:0042045	epithelial fluid transport	2	11	402	165.22	0.49
biological_process	GO:0045213	neurotransmitter receptor metabolic process	2	11	402	165.22	0.49
biological_process	GO:0045590	negative regulation of regulatory T cell differentiation	2	11	402	165.22	0.49
biological_process	GO:0045602	negative regulation of endothelial cell differentiation	2	11	402	165.22	0.49
biological_process	GO:0045687	positive regulation of glial cell differentiation	2	11	402	165.22	0.49
biological_process	GO:0046740	spread of virus in host, cell to cell	2	11	402	165.22	0.49
biological_process	GO:0048659	smooth muscle cell proliferation	2	11	402	165.22	0.49
biological_process	GO:0051155	positive regulation of striated muscle cell differentiation	2	11	402	165.22	0.49
biological_process	GO:0051387	negative regulation of nerve growth factor receptor signaling pathway	2	11	402	165.22	0.49
biological_process	GO:0051902	negative regulation of mitochondrial depolarization	2	11	402	165.22	0.49
biological_process	GO:0060040	retinal bipolar neuron differentiation	2	11	402	165.22	0.49
biological_process	GO:0060576	intestinal epithelial cell development	2	11	402	165.22	0.49
biological_process	GO:0060591	chondroblast differentiation	2	11	402	165.22	0.49
biological_process	GO:0060669	embryonic placenta morphogenesis	2	11	402	165.22	0.49
biological_process	GO:0060830	ciliary receptor clustering involved in smoothened signaling pathway	2	11	402	165.22	0.49
biological_process	GO:0061156	pulmonary artery morphogenesis	2	11	402	165.22	0.49
biological_process	GO:0072125	negative regulation of glomerular mesangial cell proliferation	2	11	402	165.22	0.49
biological_process	GO:0072172	mesonephric tubule formation	2	11	402	165.22	0.49
biological_process	GO:0072520	seminiferous tubule development	2	11	402	165.22	0.49
biological_process	GO:2000223	regulation of BMP signaling pathway involved in heart jogging	2	11	402	165.22	0.49
cellular_component	GO:0044464	cell part	2	11	402	165.22	0.49
molecular_function	GO:0004346	glucose-6-phosphatase activity	2	11	402	165.22	0.49
molecular_function	GO:0005497	androgen binding	2	11	402	165.22	0.49
molecular_function	GO:0046922	peptide-O-fucosyltransferase activity	2	11	402	165.22	0.49
biological_process	GO:0002035	brain renin-angiotensin system	2	12	402	151.45	0.49
biological_process	GO:0002326	B cell lineage commitment	2	12	402	151.45	0.49
biological_process	GO:0007386	compartment pattern specification	2	12	402	151.45	0.49
biological_process	GO:0010909	positive regulation of heparan sulfate proteoglycan biosynthetic process	2	12	402	151.45	0.49
biological_process	GO:0030323	respiratory tube development	2	12	402	151.45	0.49
biological_process	GO:0030538	embryonic genitalia morphogenesis	2	12	402	151.45	0.49
biological_process	GO:0031077	post-embryonic camera-type eye development	2	12	402	151.45	0.49
biological_process	GO:0032489	regulation of Cdc42 protein signal transduction	2	12	402	151.45	0.49
biological_process	GO:0035166	post-embryonic hemopoiesis	2	12	402	151.45	0.49
biological_process	GO:0036066	protein O-linked fucosylation	2	12	402	151.45	0.49
biological_process	GO:0043279	response to alkaloid	2	12	402	151.45	0.49
biological_process	GO:0044334	canonical Wnt receptor signaling pathway involved in positive regulation of epithelial to mesenchymal transition	2	12	402	151.45	0.49
biological_process	GO:0045720	negative regulation of integrin biosynthetic process	2	12	402	151.45	0.49
biological_process	GO:0048669	collateral sprouting in absence of injury	2	12	402	151.45	0.49
biological_process	GO:0048733	sebaceous gland development	2	12	402	151.45	0.49
biological_process	GO:0051046	regulation of secretion	2	12	402	151.45	0.49
biological_process	GO:0060003	copper ion export	2	12	402	151.45	0.49
biological_process	GO:0060379	cardiac muscle cell myoblast differentiation	2	12	402	151.45	0.49
biological_process	GO:0060486	Clara cell differentiation	2	12	402	151.45	0.49
biological_process	GO:0072054	renal outer medulla development	2	12	402	151.45	0.49
biological_process	GO:0090080	positive regulation of MAPKKK cascade by fibroblast growth factor receptor signaling pathway	2	12	402	151.45	0.49
cellular_component	GO:0034363	intermediate-density lipoprotein particle	2	12	402	151.45	0.49
cellular_component	GO:0070369	beta-catenin-TCF7L2 complex	2	12	402	151.45	0.49
molecular_function	GO:0070579	methylcytosine dioxygenase activity	2	12	402	151.45	0.49
biological_process	GO:0032869	cellular response to insulin stimulus	3	217	402	12.56	0.49
cellular_component	GO:0009897	external side of plasma membrane	5	629	402	7.22	0.49
biological_process	GO:0008340	determination of adult lifespan	7	1046	402	6.08	0.49
biological_process	GO:0000433	negative regulation of transcription from RNA polymerase II promoter by glucose	2	13	402	139.8	0.48
biological_process	GO:0001818	negative regulation of cytokine production	2	13	402	139.8	0.48
biological_process	GO:0001840	neural plate development	2	13	402	139.8	0.48
biological_process	GO:0002674	negative regulation of acute inflammatory response	2	13	402	139.8	0.48
biological_process	GO:0003085	negative regulation of systemic arterial blood pressure	2	13	402	139.8	0.48
biological_process	GO:0003309	type B pancreatic cell differentiation	2	13	402	139.8	0.48
biological_process	GO:0003417	growth plate cartilage development	2	13	402	139.8	0.48
biological_process	GO:0010380	regulation of chlorophyll biosynthetic process	2	13	402	139.8	0.48
biological_process	GO:0030997	regulation of centriole-centriole cohesion	2	13	402	139.8	0.48
biological_process	GO:0031960	response to corticosteroid stimulus	2	13	402	139.8	0.48
biological_process	GO:0042093	T-helper cell differentiation	2	13	402	139.8	0.48
biological_process	GO:0042415	norepinephrine metabolic process	2	13	402	139.8	0.48
biological_process	GO:0051057	positive regulation of small GTPase mediated signal transduction	2	13	402	139.8	0.48
biological_process	GO:0051647	nucleus localization	2	13	402	139.8	0.48
biological_process	GO:0060393	regulation of pathway-restricted SMAD protein phosphorylation	2	13	402	139.8	0.48
biological_process	GO:0060420	regulation of heart growth	2	13	402	139.8	0.48
biological_process	GO:0060463	lung lobe morphogenesis	2	13	402	139.8	0.48
biological_process	GO:0060706	cell differentiation involved in embryonic placenta development	2	13	402	139.8	0.48
biological_process	GO:0060831	smoothened signaling pathway involved in dorsal/ventral neural tube patterning	2	13	402	139.8	0.48
biological_process	GO:0072033	renal vesicle formation	2	13	402	139.8	0.48
biological_process	GO:0090370	negative regulation of cholesterol efflux	2	13	402	139.8	0.48
biological_process	GO:2000111	positive regulation of macrophage apoptotic process	2	13	402	139.8	0.48
biological_process	GO:2000974	negative regulation of pro-B cell differentiation	2	13	402	139.8	0.48
cellular_component	GO:0031232	extrinsic to external side of plasma membrane	2	13	402	139.8	0.48
molecular_function	GO:0051425	PTB domain binding	2	13	402	139.8	0.48
molecular_function	GO:0060228	phosphatidylcholine-sterol O-acyltransferase activator activity	2	13	402	139.8	0.48
biological_process	GO:0003073	regulation of systemic arterial blood pressure	2	14	402	129.81	0.48
biological_process	GO:0006706	steroid catabolic process	2	14	402	129.81	0.48
biological_process	GO:0007258	JUN phosphorylation	2	14	402	129.81	0.48
biological_process	GO:0008211	glucocorticoid metabolic process	2	14	402	129.81	0.48
biological_process	GO:0009448	gamma-aminobutyric acid metabolic process	2	14	402	129.81	0.48
biological_process	GO:0010424	DNA methylation on cytosine within a CG sequence	2	14	402	129.81	0.48
biological_process	GO:0010535	positive regulation of activation of JAK2 kinase activity	2	14	402	129.81	0.48
biological_process	GO:0010887	negative regulation of cholesterol storage	2	14	402	129.81	0.48
biological_process	GO:0021520	spinal cord motor neuron cell fate specification	2	14	402	129.81	0.48
biological_process	GO:0021533	cell differentiation in hindbrain	2	14	402	129.81	0.48
biological_process	GO:0021631	optic nerve morphogenesis	2	14	402	129.81	0.48
biological_process	GO:0021695	cerebellar cortex development	2	14	402	129.81	0.48
biological_process	GO:0022612	gland morphogenesis	2	14	402	129.81	0.48
biological_process	GO:0032747	positive regulation of interleukin-23 production	2	14	402	129.81	0.48
biological_process	GO:0033033	negative regulation of myeloid cell apoptotic process	2	14	402	129.81	0.48
biological_process	GO:0042421	norepinephrine biosynthetic process	2	14	402	129.81	0.48
biological_process	GO:0042428	serotonin metabolic process	2	14	402	129.81	0.48
biological_process	GO:0045918	negative regulation of cytolysis	2	14	402	129.81	0.48
biological_process	GO:0046321	positive regulation of fatty acid oxidation	2	14	402	129.81	0.48
biological_process	GO:0046661	male sex differentiation	2	14	402	129.81	0.48
biological_process	GO:0051150	regulation of smooth muscle cell differentiation	2	14	402	129.81	0.48
biological_process	GO:0060117	auditory receptor cell development	2	14	402	129.81	0.48
biological_process	GO:0060688	regulation of morphogenesis of a branching structure	2	14	402	129.81	0.48
biological_process	GO:0070602	regulation of centromeric sister chromatid cohesion	2	14	402	129.81	0.48
biological_process	GO:0071514	genetic imprinting	2	14	402	129.81	0.48
biological_process	GO:0072053	renal inner medulla development	2	14	402	129.81	0.48
biological_process	GO:0097120	receptor localization to synapse	2	14	402	129.81	0.48
biological_process	GO:2000737	negative regulation of stem cell differentiation	2	14	402	129.81	0.48
cellular_component	GO:0005924	cell-substrate adherens junction	2	14	402	129.81	0.48
molecular_function	GO:0004705	JUN kinase activity	2	14	402	129.81	0.48
molecular_function	GO:0005111	type 2 fibroblast growth factor receptor binding	2	14	402	129.81	0.48
biological_process	GO:0001915	negative regulation of T cell mediated cytotoxicity	2	15	402	121.16	0.48
biological_process	GO:0006021	inositol biosynthetic process	2	15	402	121.16	0.48
biological_process	GO:0006584	catecholamine metabolic process	2	15	402	121.16	0.48
biological_process	GO:0007403	glial cell fate determination	2	15	402	121.16	0.48
biological_process	GO:0007440	foregut morphogenesis	2	15	402	121.16	0.48
biological_process	GO:0014824	artery smooth muscle contraction	2	15	402	121.16	0.48
biological_process	GO:0019100	male germ-line sex determination	2	15	402	121.16	0.48
biological_process	GO:0021675	nerve development	2	15	402	121.16	0.48
biological_process	GO:0021696	cerebellar cortex morphogenesis	2	15	402	121.16	0.48
biological_process	GO:0021861	forebrain radial glial cell differentiation	2	15	402	121.16	0.48
biological_process	GO:0030730	sequestering of triglyceride	2	15	402	121.16	0.48
biological_process	GO:0030857	negative regulation of epithelial cell differentiation	2	15	402	121.16	0.48
biological_process	GO:0032609	interferon-gamma production	2	15	402	121.16	0.48
biological_process	GO:0034380	high-density lipoprotein particle assembly	2	15	402	121.16	0.48
biological_process	GO:0046148	pigment biosynthetic process	2	15	402	121.16	0.48
biological_process	GO:0046483	heterocycle metabolic process	2	15	402	121.16	0.48
biological_process	GO:0048333	mesodermal cell differentiation	2	15	402	121.16	0.48
biological_process	GO:0060406	positive regulation of penile erection	2	15	402	121.16	0.48
biological_process	GO:0060415	muscle tissue morphogenesis	2	15	402	121.16	0.48
biological_process	GO:0060586	multicellular organismal iron ion homeostasis	2	15	402	121.16	0.48
biological_process	GO:0060841	venous blood vessel development	2	15	402	121.16	0.48
biological_process	GO:0061030	epithelial cell differentiation involved in mammary gland alveolus development	2	15	402	121.16	0.48
biological_process	GO:0070244	negative regulation of thymocyte apoptotic process	2	15	402	121.16	0.48
biological_process	GO:0070314	G1 to G0 transition	2	15	402	121.16	0.48
biological_process	GO:0097119	postsynaptic density protein 95 clustering	2	15	402	121.16	0.48
biological_process	GO:2000741	positive regulation of mesenchymal stem cell differentiation	2	15	402	121.16	0.48
cellular_component	GO:0000125	PCAF complex	2	15	402	121.16	0.48
cellular_component	GO:0031253	cell projection membrane	2	15	402	121.16	0.48
molecular_function	GO:0002162	dystroglycan binding	2	15	402	121.16	0.48
molecular_function	GO:0043237	laminin-1 binding	2	15	402	121.16	0.48
biological_process	GO:0001776	leukocyte homeostasis	2	16	402	113.59	0.48
biological_process	GO:0002043	blood vessel endothelial cell proliferation involved in sprouting angiogenesis	2	16	402	113.59	0.48
biological_process	GO:0006582	melanin metabolic process	2	16	402	113.59	0.48
biological_process	GO:0010492	maintenance of shoot apical meristem identity	2	16	402	113.59	0.48
biological_process	GO:0010891	negative regulation of sequestering of triglyceride	2	16	402	113.59	0.48
biological_process	GO:0014898	cardiac muscle hypertrophy in response to stress	2	16	402	113.59	0.48
biological_process	GO:0021559	trigeminal nerve development	2	16	402	113.59	0.48
biological_process	GO:0021895	cerebral cortex neuron differentiation	2	16	402	113.59	0.48
biological_process	GO:0032237	activation of store-operated calcium channel activity	2	16	402	113.59	0.48
biological_process	GO:0032469	endoplasmic reticulum calcium ion homeostasis	2	16	402	113.59	0.48
biological_process	GO:0032474	otolith morphogenesis	2	16	402	113.59	0.48
biological_process	GO:0032725	positive regulation of granulocyte macrophage colony-stimulating factor production	2	16	402	113.59	0.48
biological_process	GO:0034384	high-density lipoprotein particle clearance	2	16	402	113.59	0.48
biological_process	GO:0035986	senescence-associated heterochromatin focus assembly	2	16	402	113.59	0.48
biological_process	GO:0045446	endothelial cell differentiation	2	16	402	113.59	0.48
biological_process	GO:0046822	regulation of nucleocytoplasmic transport	2	16	402	113.59	0.48
biological_process	GO:0050663	cytokine secretion	2	16	402	113.59	0.48
biological_process	GO:0051573	negative regulation of histone H3-K9 methylation	2	16	402	113.59	0.48
biological_process	GO:0060687	regulation of branching involved in prostate gland morphogenesis	2	16	402	113.59	0.48
biological_process	GO:0060789	hair follicle placode formation	2	16	402	113.59	0.48
biological_process	GO:0071803	positive regulation of podosome assembly	2	16	402	113.59	0.48
biological_process	GO:2000008	regulation of protein localization to cell surface	2	16	402	113.59	0.48
cellular_component	GO:0035985	senescence-associated heterochromatin focus	2	16	402	113.59	0.48
molecular_function	GO:0071813	lipoprotein particle binding	2	16	402	113.59	0.48
biological_process	GO:0007176	regulation of epidermal growth factor-activated receptor activity	2	17	402	106.91	0.48
biological_process	GO:0010187	negative regulation of seed germination	2	17	402	106.91	0.48
biological_process	GO:0010273	detoxification of copper ion	2	17	402	106.91	0.48
biological_process	GO:0019530	taurine metabolic process	2	17	402	106.91	0.48
biological_process	GO:0032930	positive regulation of superoxide anion generation	2	17	402	106.91	0.48
biological_process	GO:0034382	chylomicron remnant clearance	2	17	402	106.91	0.48
biological_process	GO:0035993	deltoid tuberosity development	2	17	402	106.91	0.48
biological_process	GO:0046632	alpha-beta T cell differentiation	2	17	402	106.91	0.48
biological_process	GO:0048070	regulation of developmental pigmentation	2	17	402	106.91	0.48
biological_process	GO:0048554	positive regulation of metalloenzyme activity	2	17	402	106.91	0.48
biological_process	GO:0050684	regulation of mRNA processing	2	17	402	106.91	0.48
biological_process	GO:0060561	apoptotic process involved in morphogenesis	2	17	402	106.91	0.48
biological_process	GO:0060670	branching involved in labyrinthine layer morphogenesis	2	17	402	106.91	0.48
biological_process	GO:0061003	positive regulation of dendritic spine morphogenesis	2	17	402	106.91	0.48
biological_process	GO:0061037	negative regulation of cartilage development	2	17	402	106.91	0.48
biological_process	GO:0061072	iris morphogenesis	2	17	402	106.91	0.48
biological_process	GO:0065004	protein-DNA complex assembly	2	17	402	106.91	0.48
biological_process	GO:0070734	histone H3-K27 methylation	2	17	402	106.91	0.48
biological_process	GO:0071657	positive regulation of granulocyte colony-stimulating factor production	2	17	402	106.91	0.48
molecular_function	GO:0001228	RNA polymerase II transcription regulatory region sequence-specific DNA binding transcription factor activity involved in positive regulation of transcription	2	17	402	106.91	0.48
molecular_function	GO:0005168	neurotrophin TRKA receptor binding	2	17	402	106.91	0.48
molecular_function	GO:0016532	superoxide dismutase copper chaperone activity	2	17	402	106.91	0.48
biological_process	GO:0002329	pre-B cell differentiation	2	18	402	100.97	0.48
biological_process	GO:0016098	monoterpenoid metabolic process	2	18	402	100.97	0.48
biological_process	GO:0033085	negative regulation of T cell differentiation in thymus	2	18	402	100.97	0.48
biological_process	GO:0034372	very-low-density lipoprotein particle remodeling	2	18	402	100.97	0.48
biological_process	GO:0034393	positive regulation of smooth muscle cell apoptotic process	2	18	402	100.97	0.48
biological_process	GO:0042129	regulation of T cell proliferation	2	18	402	100.97	0.48
biological_process	GO:0045084	positive regulation of interleukin-12 biosynthetic process	2	18	402	100.97	0.48
biological_process	GO:0048251	elastic fiber assembly	2	18	402	100.97	0.48
biological_process	GO:0048643	positive regulation of skeletal muscle tissue development	2	18	402	100.97	0.48
biological_process	GO:0051593	response to folic acid	2	18	402	100.97	0.48
biological_process	GO:0060492	lung induction	2	18	402	100.97	0.48
biological_process	GO:0060736	prostate gland growth	2	18	402	100.97	0.48
biological_process	GO:0060857	establishment of glial blood-brain barrier	2	18	402	100.97	0.48
biological_process	GO:0080022	primary root development	2	18	402	100.97	0.48
biological_process	GO:2000774	positive regulation of cellular senescence	2	18	402	100.97	0.48
biological_process	GO:0003180	aortic valve morphogenesis	2	19	402	95.65	0.48
biological_process	GO:0003197	endocardial cushion development	2	19	402	95.65	0.48
biological_process	GO:0003344	pericardium morphogenesis	2	19	402	95.65	0.48
biological_process	GO:0010863	positive regulation of phospholipase C activity	2	19	402	95.65	0.48
biological_process	GO:0018023	peptidyl-lysine trimethylation	2	19	402	95.65	0.48
biological_process	GO:0018894	dibenzo-p-dioxin metabolic process	2	19	402	95.65	0.48
biological_process	GO:0021587	cerebellum morphogenesis	2	19	402	95.65	0.48
biological_process	GO:0022009	central nervous system vasculogenesis	2	19	402	95.65	0.48
biological_process	GO:0033600	negative regulation of mammary gland epithelial cell proliferation	2	19	402	95.65	0.48
biological_process	GO:0042118	endothelial cell activation	2	19	402	95.65	0.48
biological_process	GO:0048387	negative regulation of retinoic acid receptor signaling pathway	2	19	402	95.65	0.48
biological_process	GO:0048936	peripheral nervous system neuron axonogenesis	2	19	402	95.65	0.48
biological_process	GO:0060119	inner ear receptor cell development	2	19	402	95.65	0.48
biological_process	GO:0060416	response to growth hormone stimulus	2	19	402	95.65	0.48
biological_process	GO:0061154	endothelial tube morphogenesis	2	19	402	95.65	0.48
biological_process	GO:0070166	enamel mineralization	2	19	402	95.65	0.48
biological_process	GO:0072205	metanephric collecting duct development	2	19	402	95.65	0.48
biological_process	GO:0090129	positive regulation of synapse maturation	2	19	402	95.65	0.48
biological_process	GO:0003300	cardiac muscle hypertrophy	2	20	402	90.87	0.48
biological_process	GO:0009403	toxin biosynthetic process	2	20	402	90.87	0.48
biological_process	GO:0042158	lipoprotein biosynthetic process	2	20	402	90.87	0.48
biological_process	GO:0045541	negative regulation of cholesterol biosynthetic process	2	20	402	90.87	0.48
biological_process	GO:0046533	negative regulation of photoreceptor cell differentiation	2	20	402	90.87	0.48
biological_process	GO:0048332	mesoderm morphogenesis	2	20	402	90.87	0.48
biological_process	GO:0051101	regulation of DNA binding	2	20	402	90.87	0.48
biological_process	GO:0051444	negative regulation of ubiquitin-protein ligase activity	2	20	402	90.87	0.48
biological_process	GO:0051549	positive regulation of keratinocyte migration	2	20	402	90.87	0.48
biological_process	GO:0090003	regulation of establishment of protein localization to plasma membrane	2	20	402	90.87	0.48
cellular_component	GO:0034362	low-density lipoprotein particle	2	20	402	90.87	0.48
cellular_component	GO:0045334	clathrin-coated endocytic vesicle	2	20	402	90.87	0.48
molecular_function	GO:0050998	nitric-oxide synthase binding	2	20	402	90.87	0.48
molecular_function	GO:0051400	BH domain binding	2	20	402	90.87	0.48
biological_process	GO:0002021	response to dietary excess	2	21	402	86.54	0.48
biological_process	GO:0010667	negative regulation of cardiac muscle cell apoptotic process	2	21	402	86.54	0.48
biological_process	GO:0017145	stem cell division	2	21	402	86.54	0.48
biological_process	GO:0021782	glial cell development	2	21	402	86.54	0.48
biological_process	GO:0021885	forebrain cell migration	2	21	402	86.54	0.48
biological_process	GO:0032224	positive regulation of synaptic transmission, cholinergic	2	21	402	86.54	0.48
biological_process	GO:0032495	response to muramyl dipeptide	2	21	402	86.54	0.48
biological_process	GO:0032731	positive regulation of interleukin-1 beta production	2	21	402	86.54	0.48
biological_process	GO:0033147	negative regulation of intracellular estrogen receptor signaling pathway	2	21	402	86.54	0.48
biological_process	GO:0034101	erythrocyte homeostasis	2	21	402	86.54	0.48
biological_process	GO:0042473	outer ear morphogenesis	2	21	402	86.54	0.48
biological_process	GO:0043497	regulation of protein heterodimerization activity	2	21	402	86.54	0.48
biological_process	GO:0045843	negative regulation of striated muscle tissue development	2	21	402	86.54	0.48
biological_process	GO:0045899	positive regulation of RNA polymerase II transcriptional preinitiation complex assembly	2	21	402	86.54	0.48
biological_process	GO:0046498	S-adenosylhomocysteine metabolic process	2	21	402	86.54	0.48
biological_process	GO:0050884	neuromuscular process controlling posture	2	21	402	86.54	0.48
biological_process	GO:0060351	cartilage development involved in endochondral bone morphogenesis	2	21	402	86.54	0.48
biological_process	GO:0071681	cellular response to indole-3-methanol	2	21	402	86.54	0.48
biological_process	GO:0072136	metanephric mesenchymal cell proliferation involved in metanephros development	2	21	402	86.54	0.48
molecular_function	GO:0005068	transmembrane receptor protein tyrosine kinase adaptor activity	2	21	402	86.54	0.48
molecular_function	GO:0005078	MAP-kinase scaffold activity	2	21	402	86.54	0.48
biological_process	GO:0003136	negative regulation of heart induction by canonical Wnt receptor signaling pathway	2	22	402	82.61	0.47
biological_process	GO:0006029	proteoglycan metabolic process	2	22	402	82.61	0.47
biological_process	GO:0006778	porphyrin-containing compound metabolic process	2	22	402	82.61	0.47
biological_process	GO:0021797	forebrain anterior/posterior pattern specification	2	22	402	82.61	0.47
biological_process	GO:0042640	anagen	2	22	402	82.61	0.47
biological_process	GO:0043403	skeletal muscle tissue regeneration	2	22	402	82.61	0.47
biological_process	GO:0045348	positive regulation of MHC class II biosynthetic process	2	22	402	82.61	0.47
biological_process	GO:0051918	negative regulation of fibrinolysis	2	22	402	82.61	0.47
biological_process	GO:0060113	inner ear receptor cell differentiation	2	22	402	82.61	0.47
biological_process	GO:0061303	cornea development in camera-type eye	2	22	402	82.61	0.47
biological_process	GO:0071157	negative regulation of cell cycle arrest	2	22	402	82.61	0.47
biological_process	GO:0072102	glomerulus morphogenesis	2	22	402	82.61	0.47
biological_process	GO:0072358	cardiovascular system development	2	22	402	82.61	0.47
biological_process	GO:0090279	regulation of calcium ion import	2	22	402	82.61	0.47
biological_process	GO:0097028	dendritic cell differentiation	2	22	402	82.61	0.47
cellular_component	GO:0005790	smooth endoplasmic reticulum	2	22	402	82.61	0.47
molecular_function	GO:0070063	RNA polymerase binding	2	22	402	82.61	0.47
biological_process	GO:0006089	lactate metabolic process	2	23	402	79.02	0.47
biological_process	GO:0006975	DNA damage induced protein phosphorylation	2	23	402	79.02	0.47
biological_process	GO:0010832	negative regulation of myotube differentiation	2	23	402	79.02	0.47
biological_process	GO:0030432	peristalsis	2	23	402	79.02	0.47
biological_process	GO:0042536	negative regulation of tumor necrosis factor biosynthetic process	2	23	402	79.02	0.47
biological_process	GO:0050671	positive regulation of lymphocyte proliferation	2	23	402	79.02	0.47
biological_process	GO:0055015	ventricular cardiac muscle cell development	2	23	402	79.02	0.47
biological_process	GO:0060017	parathyroid gland development	2	23	402	79.02	0.47
biological_process	GO:0060039	pericardium development	2	23	402	79.02	0.47
biological_process	GO:0060993	kidney morphogenesis	2	23	402	79.02	0.47
molecular_function	GO:0005007	fibroblast growth factor-activated receptor activity	2	23	402	79.02	0.47
molecular_function	GO:0051434	BH3 domain binding	2	23	402	79.02	0.47
biological_process	GO:0010544	negative regulation of platelet activation	2	24	402	75.73	0.47
biological_process	GO:0034374	low-density lipoprotein particle remodeling	2	24	402	75.73	0.47
biological_process	GO:0035815	positive regulation of renal sodium excretion	2	24	402	75.73	0.47
biological_process	GO:0042738	exogenous drug catabolic process	2	24	402	75.73	0.47
biological_process	GO:0051353	positive regulation of oxidoreductase activity	2	24	402	75.73	0.47
biological_process	GO:0060644	mammary gland epithelial cell differentiation	2	24	402	75.73	0.47
biological_process	GO:0071375	cellular response to peptide hormone stimulus	2	24	402	75.73	0.47
molecular_function	GO:0000989	transcription factor binding transcription factor activity	2	24	402	75.73	0.47
molecular_function	GO:0004008	copper-exporting ATPase activity	2	24	402	75.73	0.47
molecular_function	GO:0005024	transforming growth factor beta-activated receptor activity	2	24	402	75.73	0.47
biological_process	GO:0001967	suckling behavior	2	25	402	72.7	0.47
biological_process	GO:0010631	epithelial cell migration	2	25	402	72.7	0.47
biological_process	GO:0010907	positive regulation of glucose metabolic process	2	25	402	72.7	0.47
biological_process	GO:0015677	copper ion import	2	25	402	72.7	0.47
biological_process	GO:0032000	positive regulation of fatty acid beta-oxidation	2	25	402	72.7	0.47
biological_process	GO:0032925	regulation of activin receptor signaling pathway	2	25	402	72.7	0.47
biological_process	GO:0042756	drinking behavior	2	25	402	72.7	0.47
biological_process	GO:0043568	positive regulation of insulin-like growth factor receptor signaling pathway	2	25	402	72.7	0.47
biological_process	GO:0048853	forebrain morphogenesis	2	25	402	72.7	0.47
biological_process	GO:0060686	negative regulation of prostatic bud formation	2	25	402	72.7	0.47
cellular_component	GO:0001652	granular component	2	25	402	72.7	0.47
cellular_component	GO:0030135	coated vesicle	2	25	402	72.7	0.47
cellular_component	GO:0042627	chylomicron	2	25	402	72.7	0.47
molecular_function	GO:0004882	androgen receptor activity	2	25	402	72.7	0.47
molecular_function	GO:0031702	type 1 angiotensin receptor binding	2	25	402	72.7	0.47
biological_process	GO:0001952	regulation of cell-matrix adhesion	2	26	402	69.9	0.47
biological_process	GO:0010226	response to lithium ion	2	26	402	69.9	0.47
biological_process	GO:0032481	positive regulation of type I interferon production	2	26	402	69.9	0.47
biological_process	GO:0048339	paraxial mesoderm development	2	26	402	69.9	0.47
biological_process	GO:0048711	positive regulation of astrocyte differentiation	2	26	402	69.9	0.47
molecular_function	GO:0008432	JUN kinase binding	2	26	402	69.9	0.47
molecular_function	GO:0048156	tau protein binding	2	26	402	69.9	0.47
biological_process	GO:0006983	ER overload response	2	27	402	67.31	0.47
biological_process	GO:0030828	positive regulation of cGMP biosynthetic process	2	27	402	67.31	0.47
biological_process	GO:0032026	response to magnesium ion	2	27	402	67.31	0.47
biological_process	GO:0045059	positive thymic T cell selection	2	27	402	67.31	0.47
biological_process	GO:0045742	positive regulation of epidermal growth factor receptor signaling pathway	2	27	402	67.31	0.47
biological_process	GO:0046415	urate metabolic process	2	27	402	67.31	0.47
cellular_component	GO:0005581	collagen	2	27	402	67.31	0.47
biological_process	GO:0002087	regulation of respiratory gaseous exchange by neurological system process	2	28	402	64.91	0.47
biological_process	GO:0014047	glutamate secretion	2	28	402	64.91	0.47
biological_process	GO:0033235	positive regulation of protein sumoylation	2	28	402	64.91	0.47
biological_process	GO:0036065	fucosylation	2	28	402	64.91	0.47
biological_process	GO:0043043	peptide biosynthetic process	2	28	402	64.91	0.47
biological_process	GO:0048096	chromatin-mediated maintenance of transcription	2	28	402	64.91	0.47
biological_process	GO:0048263	determination of dorsal identity	2	28	402	64.91	0.47
biological_process	GO:0055089	fatty acid homeostasis	2	28	402	64.91	0.47
biological_process	GO:0090102	cochlea development	2	28	402	64.91	0.47
biological_process	GO:0033261	regulation of S phase	2	29	402	62.67	0.47
biological_process	GO:0042116	macrophage activation	2	29	402	62.67	0.47
biological_process	GO:0042403	thyroid hormone metabolic process	2	29	402	62.67	0.47
biological_process	GO:0048714	positive regulation of oligodendrocyte differentiation	2	29	402	62.67	0.47
biological_process	GO:0048872	homeostasis of number of cells	2	29	402	62.67	0.47
biological_process	GO:0051124	synaptic growth at neuromuscular junction	2	29	402	62.67	0.47
biological_process	GO:0061178	regulation of insulin secretion involved in cellular response to glucose stimulus	2	29	402	62.67	0.47
biological_process	GO:0070306	lens fiber cell differentiation	2	29	402	62.67	0.47
cellular_component	GO:0045120	pronucleus	2	29	402	62.67	0.47
molecular_function	GO:0016504	peptidase activator activity	2	29	402	62.67	0.47
molecular_function	GO:0070410	co-SMAD binding	2	29	402	62.67	0.47
biological_process	GO:0010216	maintenance of DNA methylation	2	30	402	60.58	0.47
biological_process	GO:0010452	histone H3-K36 methylation	2	30	402	60.58	0.47
biological_process	GO:0021846	cell proliferation in forebrain	2	30	402	60.58	0.47
biological_process	GO:0031659	positive regulation of cyclin-dependent protein kinase activity involved in G1/S	2	30	402	60.58	0.47
biological_process	GO:0032099	negative regulation of appetite	2	30	402	60.58	0.47
biological_process	GO:0032695	negative regulation of interleukin-12 production	2	30	402	60.58	0.47
biological_process	GO:0035067	negative regulation of histone acetylation	2	30	402	60.58	0.47
biological_process	GO:0045723	positive regulation of fatty acid biosynthetic process	2	30	402	60.58	0.47
biological_process	GO:0071599	otic vesicle development	2	30	402	60.58	0.47
cellular_component	GO:0030673	axolemma	2	30	402	60.58	0.47
cellular_component	GO:0046930	pore complex	2	30	402	60.58	0.47
molecular_function	GO:0001076	RNA polymerase II transcription factor binding transcription factor activity	2	30	402	60.58	0.47
molecular_function	GO:0003707	steroid hormone receptor activity	2	30	402	60.58	0.47
molecular_function	GO:0004723	calcium-dependent protein serine/threonine phosphatase activity	2	30	402	60.58	0.47
biological_process	GO:0008217	regulation of blood pressure	3	238	402	11.45	0.47
biological_process	GO:0006805	xenobiotic metabolic process	3	239	402	11.41	0.47
biological_process	GO:0048011	nerve growth factor receptor signaling pathway	3	244	402	11.17	0.47
biological_process	GO:0001945	lymph vessel development	2	31	402	58.63	0.46
biological_process	GO:0006883	cellular sodium ion homeostasis	2	31	402	58.63	0.46
biological_process	GO:0030423	targeting of mRNA for destruction involved in RNA interference	2	31	402	58.63	0.46
biological_process	GO:0033700	phospholipid efflux	2	31	402	58.63	0.46
biological_process	GO:0051156	glucose 6-phosphate metabolic process	2	31	402	58.63	0.46
cellular_component	GO:0031988	membrane-bounded vesicle	2	31	402	58.63	0.46
molecular_function	GO:0003886	DNA (cytosine-5-)-methyltransferase activity	2	31	402	58.63	0.46
molecular_function	GO:0017127	cholesterol transporter activity	2	31	402	58.63	0.46
molecular_function	GO:0033192	calmodulin-dependent protein phosphatase activity	2	31	402	58.63	0.46
molecular_function	GO:0070700	BMP receptor binding	2	31	402	58.63	0.46
biological_process	GO:0006020	inositol metabolic process	2	32	402	56.79	0.46
biological_process	GO:0010744	positive regulation of macrophage derived foam cell differentiation	2	32	402	56.79	0.46
molecular_function	GO:0001190	RNA polymerase II transcription factor binding transcription factor activity involved in positive regulation of transcription	2	32	402	56.79	0.46
molecular_function	GO:0009008	DNA-methyltransferase activity	2	32	402	56.79	0.46
biological_process	GO:0045579	positive regulation of B cell differentiation	2	33	402	55.07	0.46
biological_process	GO:0045656	negative regulation of monocyte differentiation	2	33	402	55.07	0.46
biological_process	GO:0046849	bone remodeling	2	33	402	55.07	0.46
biological_process	GO:0060541	respiratory system development	2	33	402	55.07	0.46
biological_process	GO:1901215	negative regulation of neuron death	2	33	402	55.07	0.46
molecular_function	GO:0042809	vitamin D receptor binding	2	33	402	55.07	0.46
molecular_function	GO:0048407	platelet-derived growth factor binding	2	33	402	55.07	0.46
biological_process	GO:0007400	neuroblast fate determination	2	34	402	53.45	0.46
biological_process	GO:0034375	high-density lipoprotein particle remodeling	2	34	402	53.45	0.46
biological_process	GO:0043067	regulation of programmed cell death	2	34	402	53.45	0.46
biological_process	GO:0043496	regulation of protein homodimerization activity	2	34	402	53.45	0.46
biological_process	GO:0051146	striated muscle cell differentiation	2	34	402	53.45	0.46
molecular_function	GO:0031434	mitogen-activated protein kinase kinase binding	2	34	402	53.45	0.46
biological_process	GO:0007263	nitric oxide mediated signal transduction	2	35	402	51.93	0.46
biological_process	GO:0016574	histone ubiquitination	2	35	402	51.93	0.46
biological_process	GO:0019934	cGMP-mediated signaling	2	35	402	51.93	0.46
biological_process	GO:0035095	behavioral response to nicotine	2	35	402	51.93	0.46
biological_process	GO:0042310	vasoconstriction	2	35	402	51.93	0.46
biological_process	GO:0045582	positive regulation of T cell differentiation	2	35	402	51.93	0.46
biological_process	GO:0050795	regulation of behavior	2	35	402	51.93	0.46
biological_process	GO:0060008	Sertoli cell differentiation	2	35	402	51.93	0.46
biological_process	GO:0060347	heart trabecula formation	2	35	402	51.93	0.46
cellular_component	GO:0032809	neuronal cell body membrane	2	35	402	51.93	0.46
cellular_component	GO:0035253	ciliary rootlet	2	35	402	51.93	0.46
biological_process	GO:0001953	negative regulation of cell-matrix adhesion	2	36	402	50.48	0.46
biological_process	GO:0010613	positive regulation of cardiac muscle hypertrophy	2	36	402	50.48	0.46
biological_process	GO:0030916	otic vesicle formation	2	36	402	50.48	0.46
biological_process	GO:0043583	ear development	2	36	402	50.48	0.46
biological_process	GO:0043616	keratinocyte proliferation	2	36	402	50.48	0.46
biological_process	GO:0046500	S-adenosylmethionine metabolic process	2	36	402	50.48	0.46
biological_process	GO:0051412	response to corticosterone stimulus	2	36	402	50.48	0.46
cellular_component	GO:0034364	high-density lipoprotein particle	2	36	402	50.48	0.46
molecular_function	GO:0016773	phosphotransferase activity, alcohol group as acceptor	2	36	402	50.48	0.46
molecular_function	GO:0045294	alpha-catenin binding	2	36	402	50.48	0.46
biological_process	GO:0001763	morphogenesis of a branching structure	2	37	402	49.12	0.46
biological_process	GO:0010460	positive regulation of heart rate	2	37	402	49.12	0.46
biological_process	GO:0043011	myeloid dendritic cell differentiation	2	37	402	49.12	0.46
biological_process	GO:0046470	phosphatidylcholine metabolic process	2	37	402	49.12	0.46
biological_process	GO:0048048	embryonic eye morphogenesis	2	37	402	49.12	0.46
biological_process	GO:0050872	white fat cell differentiation	2	37	402	49.12	0.46
biological_process	GO:0060547	negative regulation of necrotic cell death	2	37	402	49.12	0.46
biological_process	GO:0070986	left/right axis specification	2	37	402	49.12	0.46
cellular_component	GO:0030877	beta-catenin destruction complex	2	37	402	49.12	0.46
cellular_component	GO:0030914	STAGA complex	2	37	402	49.12	0.46
molecular_function	GO:0001075	RNA polymerase II core promoter sequence-specific DNA binding transcription factor activity involved in preinitiation complex assembly	2	37	402	49.12	0.46
molecular_function	GO:0004617	phosphoglycerate dehydrogenase activity	2	37	402	49.12	0.46
molecular_function	GO:0048027	mRNA 5'-UTR binding	2	37	402	49.12	0.46
biological_process	GO:0006307	DNA dealkylation involved in DNA repair	2	38	402	47.83	0.46
biological_process	GO:0010745	negative regulation of macrophage derived foam cell differentiation	2	38	402	47.83	0.46
biological_process	GO:0010812	negative regulation of cell-substrate adhesion	2	38	402	47.83	0.46
biological_process	GO:0010875	positive regulation of cholesterol efflux	2	38	402	47.83	0.46
biological_process	GO:0010975	regulation of neuron projection development	2	38	402	47.83	0.46
biological_process	GO:2000463	positive regulation of excitatory postsynaptic membrane potential	2	38	402	47.83	0.46
cellular_component	GO:0031528	microvillus membrane	2	38	402	47.83	0.46
cellular_component	GO:0044306	neuron projection terminus	2	38	402	47.83	0.46
biological_process	GO:0009957	epidermal cell fate specification	2	39	402	46.6	0.46
biological_process	GO:0014850	response to muscle activity	2	39	402	46.6	0.46
biological_process	GO:0034333	adherens junction assembly	2	39	402	46.6	0.46
biological_process	GO:0043623	cellular protein complex assembly	2	39	402	46.6	0.46
biological_process	GO:0043691	reverse cholesterol transport	2	39	402	46.6	0.46
biological_process	GO:0045618	positive regulation of keratinocyte differentiation	2	39	402	46.6	0.46
biological_process	GO:2000310	regulation of N-methyl-D-aspartate selective glutamate receptor activity	2	39	402	46.6	0.46
biological_process	GO:0007517	muscle organ development	3	252	402	10.82	0.46
biological_process	GO:0030307	positive regulation of cell growth	3	260	402	10.49	0.46
cellular_component	GO:0031965	nuclear membrane	4	463	402	7.85	0.46
molecular_function	GO:0004722	protein serine/threonine phosphatase activity	4	475	402	7.65	0.46
biological_process	GO:0022008	neurogenesis	5	685	402	6.63	0.46
biological_process	GO:0051260	protein homooligomerization	6	896	402	6.09	0.46
biological_process	GO:0006898	receptor-mediated endocytosis	6	901	402	6.05	0.46
biological_process	GO:0008088	axon cargo transport	2	40	402	45.44	0.45
biological_process	GO:0032435	negative regulation of proteasomal ubiquitin-dependent protein catabolic process	2	40	402	45.44	0.45
biological_process	GO:0040029	regulation of gene expression, epigenetic	2	40	402	45.44	0.45
biological_process	GO:0042417	dopamine metabolic process	2	40	402	45.44	0.45
biological_process	GO:0042541	hemoglobin biosynthetic process	2	40	402	45.44	0.45
biological_process	GO:0046902	regulation of mitochondrial membrane permeability	2	40	402	45.44	0.45
biological_process	GO:0090184	positive regulation of kidney development	2	40	402	45.44	0.45
cellular_component	GO:0033267	axon part	2	40	402	45.44	0.45
cellular_component	GO:0033276	transcription factor TFTC complex	2	40	402	45.44	0.45
molecular_function	GO:0031624	ubiquitin conjugating enzyme binding	2	40	402	45.44	0.45
biological_process	GO:0006101	citrate metabolic process	2	41	402	44.33	0.45
biological_process	GO:0008209	androgen metabolic process	2	41	402	44.33	0.45
biological_process	GO:0045743	positive regulation of fibroblast growth factor receptor signaling pathway	2	41	402	44.33	0.45
biological_process	GO:0050880	regulation of blood vessel size	2	41	402	44.33	0.45
molecular_function	GO:0035197	siRNA binding	2	41	402	44.33	0.45
biological_process	GO:0001823	mesonephros development	2	42	402	43.27	0.45
biological_process	GO:0010952	positive regulation of peptidase activity	2	42	402	43.27	0.45
biological_process	GO:0021772	olfactory bulb development	2	42	402	43.27	0.45
biological_process	GO:0033198	response to ATP	2	42	402	43.27	0.45
biological_process	GO:0035051	cardiac cell differentiation	2	42	402	43.27	0.45
biological_process	GO:0050803	regulation of synapse structure and activity	2	42	402	43.27	0.45
biological_process	GO:0051044	positive regulation of membrane protein ectodomain proteolysis	2	42	402	43.27	0.45
biological_process	GO:0051602	response to electrical stimulus	2	42	402	43.27	0.45
biological_process	GO:0055008	cardiac muscle tissue morphogenesis	2	42	402	43.27	0.45
cellular_component	GO:0005916	fascia adherens	2	42	402	43.27	0.45
cellular_component	GO:0034361	very-low-density lipoprotein particle	2	42	402	43.27	0.45
biological_process	GO:0003281	ventricular septum development	2	43	402	42.27	0.45
biological_process	GO:0006568	tryptophan metabolic process	2	43	402	42.27	0.45
biological_process	GO:0021591	ventricular system development	2	43	402	42.27	0.45
biological_process	GO:0035188	hatching	2	43	402	42.27	0.45
biological_process	GO:0035418	protein localization to synapse	2	43	402	42.27	0.45
biological_process	GO:0045109	intermediate filament organization	2	43	402	42.27	0.45
cellular_component	GO:0016342	catenin complex	2	43	402	42.27	0.45
molecular_function	GO:0016712	oxidoreductase activity, acting on paired donors, with incorporation or reduction of molecular oxygen, reduced flavin or flavoprotein as one donor, and incorporation of one atom of oxygen	2	43	402	42.27	0.45
molecular_function	GO:0071837	HMG box domain binding	2	43	402	42.27	0.45
biological_process	GO:0006473	protein acetylation	2	44	402	41.3	0.45
biological_process	GO:0007617	mating behavior	2	44	402	41.3	0.45
biological_process	GO:0009404	toxin metabolic process	2	44	402	41.3	0.45
biological_process	GO:0017156	calcium ion-dependent exocytosis	2	44	402	41.3	0.45
biological_process	GO:0030510	regulation of BMP signaling pathway	2	44	402	41.3	0.45
biological_process	GO:0035137	hindlimb morphogenesis	2	44	402	41.3	0.45
biological_process	GO:0035909	aorta morphogenesis	2	44	402	41.3	0.45
biological_process	GO:0050709	negative regulation of protein secretion	2	44	402	41.3	0.45
biological_process	GO:0060384	innervation	2	44	402	41.3	0.45
biological_process	GO:0060749	mammary gland alveolus development	2	44	402	41.3	0.45
biological_process	GO:2000377	regulation of reactive oxygen species metabolic process	2	44	402	41.3	0.45
cellular_component	GO:0044295	axonal growth cone	2	44	402	41.3	0.45
molecular_function	GO:0050750	low-density lipoprotein particle receptor binding	2	44	402	41.3	0.45
biological_process	GO:0000578	embryonic axis specification	2	45	402	40.39	0.45
biological_process	GO:0006566	threonine metabolic process	2	45	402	40.39	0.45
biological_process	GO:0021510	spinal cord development	2	45	402	40.39	0.45
biological_process	GO:0030225	macrophage differentiation	2	45	402	40.39	0.45
biological_process	GO:0031396	regulation of protein ubiquitination	2	45	402	40.39	0.45
biological_process	GO:0051782	negative regulation of cell division	2	45	402	40.39	0.45
cellular_component	GO:0005915	zonula adherens	2	45	402	40.39	0.45
biological_process	GO:0001841	neural tube formation	2	46	402	39.51	0.45
biological_process	GO:0008637	apoptotic mitochondrial changes	2	46	402	39.51	0.45
biological_process	GO:0009910	negative regulation of flower development	2	46	402	39.51	0.45
biological_process	GO:0043068	positive regulation of programmed cell death	2	46	402	39.51	0.45
biological_process	GO:0060218	hematopoietic stem cell differentiation	2	46	402	39.51	0.45
biological_process	GO:0031017	exocrine pancreas development	2	47	402	38.67	0.45
biological_process	GO:0071385	cellular response to glucocorticoid stimulus	2	47	402	38.67	0.45
cellular_component	GO:0043209	myelin sheath	2	47	402	38.67	0.45
molecular_function	GO:0004861	cyclin-dependent protein kinase inhibitor activity	2	47	402	38.67	0.45
biological_process	GO:0006953	acute-phase response	2	48	402	37.86	0.45
biological_process	GO:0030502	negative regulation of bone mineralization	2	48	402	37.86	0.45
biological_process	GO:0032793	positive regulation of CREB transcription factor activity	2	48	402	37.86	0.45
biological_process	GO:0043517	positive regulation of DNA damage response, signal transduction by p53 class mediator	2	48	402	37.86	0.45
biological_process	GO:0044130	negative regulation of growth of symbiont in host	2	48	402	37.86	0.45
biological_process	GO:0048596	embryonic camera-type eye morphogenesis	2	48	402	37.86	0.45
biological_process	GO:0001964	startle response	2	49	402	37.09	0.45
biological_process	GO:0007016	cytoskeletal anchoring at plasma membrane	2	49	402	37.09	0.45
biological_process	GO:0016322	neuron remodeling	2	49	402	37.09	0.45
biological_process	GO:0033365	protein localization to organelle	2	49	402	37.09	0.45
cellular_component	GO:0005719	nuclear euchromatin	2	49	402	37.09	0.45
cellular_component	GO:0005721	centromeric heterochromatin	2	49	402	37.09	0.45
cellular_component	GO:0032590	dendrite membrane	2	49	402	37.09	0.45
cellular_component	GO:0043034	costamere	2	49	402	37.09	0.45
cellular_component	GO:0043296	apical junction complex	2	49	402	37.09	0.45
molecular_function	GO:0042301	phosphate ion binding	2	49	402	37.09	0.45
molecular_function	GO:0046965	retinoid X receptor binding	2	49	402	37.09	0.45
biological_process	GO:0007243	intracellular protein kinase cascade	3	274	402	9.95	0.45
biological_process	GO:0016199	axon midline choice point recognition	2	50	402	36.35	0.44
biological_process	GO:0048265	response to pain	2	50	402	36.35	0.44
biological_process	GO:0009967	positive regulation of signal transduction	2	51	402	35.64	0.44
biological_process	GO:0022408	negative regulation of cell-cell adhesion	2	51	402	35.64	0.44
biological_process	GO:0071236	cellular response to antibiotic	2	51	402	35.64	0.44
biological_process	GO:0090399	replicative senescence	2	51	402	35.64	0.44
biological_process	GO:2000573	positive regulation of DNA biosynthetic process	2	51	402	35.64	0.44
cellular_component	GO:0005955	calcineurin complex	2	51	402	35.64	0.44
biological_process	GO:0035025	positive regulation of Rho protein signal transduction	2	52	402	34.95	0.44
biological_process	GO:0043129	surfactant homeostasis	2	52	402	34.95	0.44
biological_process	GO:0048041	focal adhesion assembly	2	52	402	34.95	0.44
cellular_component	GO:0016010	dystrophin-associated glycoprotein complex	2	52	402	34.95	0.44
molecular_function	GO:0035255	ionotropic glutamate receptor binding	2	52	402	34.95	0.44
cellular_component	GO:0032839	dendrite cytoplasm	2	53	402	34.29	0.44
biological_process	GO:0002063	chondrocyte development	2	54	402	33.66	0.44
biological_process	GO:0014911	positive regulation of smooth muscle cell migration	2	54	402	33.66	0.44
biological_process	GO:0045773	positive regulation of axon extension	2	54	402	33.66	0.44
biological_process	GO:0080111	DNA demethylation	2	54	402	33.66	0.44
biological_process	GO:0090398	cellular senescence	2	54	402	33.66	0.44
biological_process	GO:2001141	regulation of RNA biosynthetic process	2	54	402	33.66	0.44
molecular_function	GO:0031435	mitogen-activated protein kinase kinase kinase binding	2	54	402	33.66	0.44
biological_process	GO:0006349	regulation of gene expression by genetic imprinting	2	55	402	33.04	0.44
biological_process	GO:0006707	cholesterol catabolic process	2	55	402	33.04	0.44
biological_process	GO:0030224	monocyte differentiation	2	55	402	33.04	0.44
biological_process	GO:0030707	ovarian follicle cell development	2	55	402	33.04	0.44
biological_process	GO:0048384	retinoic acid receptor signaling pathway	2	55	402	33.04	0.44
biological_process	GO:0050804	regulation of synaptic transmission	2	55	402	33.04	0.44
biological_process	GO:0070723	response to cholesterol	2	55	402	33.04	0.44
biological_process	GO:0016578	histone deubiquitination	2	56	402	32.45	0.44
biological_process	GO:0040037	negative regulation of fibroblast growth factor receptor signaling pathway	2	56	402	32.45	0.44
biological_process	GO:0050905	neuromuscular process	2	56	402	32.45	0.44
biological_process	GO:0060291	long-term synaptic potentiation	2	56	402	32.45	0.44
molecular_function	GO:0008417	fucosyltransferase activity	2	56	402	32.45	0.44
biological_process	GO:0010569	regulation of double-strand break repair via homologous recombination	2	57	402	31.88	0.44
biological_process	GO:0031116	positive regulation of microtubule polymerization	2	57	402	31.88	0.44
biological_process	GO:0032007	negative regulation of TOR signaling cascade	2	57	402	31.88	0.44
biological_process	GO:0036166	phenotypic switching	2	57	402	31.88	0.44
biological_process	GO:0050930	induction of positive chemotaxis	2	57	402	31.88	0.44
biological_process	GO:0051781	positive regulation of cell division	2	57	402	31.88	0.44
molecular_function	GO:0000400	four-way junction DNA binding	2	57	402	31.88	0.44
molecular_function	GO:0005319	lipid transporter activity	2	57	402	31.88	0.44
biological_process	GO:0006521	regulation of cellular amino acid metabolic process	2	58	402	31.33	0.44
biological_process	GO:0032735	positive regulation of interleukin-12 production	2	58	402	31.33	0.44
biological_process	GO:0002027	regulation of heart rate	2	59	402	30.8	0.44
biological_process	GO:0006122	mitochondrial electron transport, ubiquinol to cytochrome c	2	59	402	30.8	0.44
biological_process	GO:0006563	L-serine metabolic process	2	59	402	30.8	0.44
cellular_component	GO:0060170	cilium membrane	2	59	402	30.8	0.44
molecular_function	GO:0030346	protein phosphatase 2B binding	2	59	402	30.8	0.44
biological_process	GO:0007179	transforming growth factor beta receptor signaling pathway	3	287	402	9.5	0.44
molecular_function	GO:0042393	histone binding	3	290	402	9.4	0.44
biological_process	GO:0000165	MAPK cascade	4	502	402	7.24	0.44
molecular_function	GO:0004672	protein kinase activity	7	1183	402	5.38	0.44
biological_process	GO:0030195	negative regulation of blood coagulation	2	60	402	30.29	0.43
biological_process	GO:0060349	bone morphogenesis	2	60	402	30.29	0.43
biological_process	GO:0045019	negative regulation of nitric oxide biosynthetic process	2	61	402	29.79	0.43
biological_process	GO:0048821	erythrocyte development	2	61	402	29.79	0.43
cellular_component	GO:0030057	desmosome	2	61	402	29.79	0.43
molecular_function	GO:0004525	ribonuclease III activity	2	61	402	29.79	0.43
biological_process	GO:0046579	positive regulation of Ras protein signal transduction	2	62	402	29.31	0.43
biological_process	GO:0048009	insulin-like growth factor receptor signaling pathway	2	62	402	29.31	0.43
biological_process	GO:0014065	phosphatidylinositol 3-kinase cascade	2	63	402	28.85	0.43
biological_process	GO:0048147	negative regulation of fibroblast proliferation	2	63	402	28.85	0.43
biological_process	GO:0048169	regulation of long-term neuronal synaptic plasticity	2	63	402	28.85	0.43
biological_process	GO:0060079	regulation of excitatory postsynaptic membrane potential	2	63	402	28.85	0.43
biological_process	GO:2001022	positive regulation of response to DNA damage stimulus	2	63	402	28.85	0.43
biological_process	GO:0008589	regulation of smoothened signaling pathway	2	64	402	28.4	0.43
biological_process	GO:0048846	axon extension involved in axon guidance	2	64	402	28.4	0.43
biological_process	GO:0050708	regulation of protein secretion	2	64	402	28.4	0.43
biological_process	GO:0005980	glycogen catabolic process	2	65	402	27.96	0.43
biological_process	GO:0031648	protein destabilization	2	65	402	27.96	0.43
biological_process	GO:0032148	activation of protein kinase B activity	2	65	402	27.96	0.43
biological_process	GO:0032728	positive regulation of interferon-beta production	2	65	402	27.96	0.43
biological_process	GO:0046328	regulation of JNK cascade	2	65	402	27.96	0.43
biological_process	GO:0048066	developmental pigmentation	2	65	402	27.96	0.43
molecular_function	GO:0003994	aconitate hydratase activity	2	65	402	27.96	0.43
molecular_function	GO:0015267	channel activity	2	65	402	27.96	0.43
biological_process	GO:0071285	cellular response to lithium ion	2	66	402	27.54	0.43
molecular_function	GO:0000987	core promoter proximal region sequence-specific DNA binding	2	66	402	27.54	0.43
biological_process	GO:0042325	regulation of phosphorylation	2	67	402	27.13	0.43
biological_process	GO:0001894	tissue homeostasis	2	68	402	26.73	0.43
biological_process	GO:0016079	synaptic vesicle exocytosis	2	68	402	26.73	0.43
biological_process	GO:0043542	endothelial cell migration	2	68	402	26.73	0.43
biological_process	GO:0007588	excretion	2	69	402	26.34	0.43
biological_process	GO:0016331	morphogenesis of embryonic epithelium	2	69	402	26.34	0.43
biological_process	GO:0046034	ATP metabolic process	2	69	402	26.34	0.43
biological_process	GO:0071276	cellular response to cadmium ion	2	69	402	26.34	0.43
molecular_function	GO:0004435	phosphatidylinositol phospholipase C activity	2	70	402	25.96	0.43
biological_process	GO:0046777	protein autophosphorylation	5	770	402	5.9	0.43
biological_process	GO:0010150	leaf senescence	2	71	402	25.6	0.42
biological_process	GO:0033344	cholesterol efflux	2	71	402	25.6	0.42
biological_process	GO:0035094	response to nicotine	2	71	402	25.6	0.42
biological_process	GO:0042246	tissue regeneration	2	71	402	25.6	0.42
cellular_component	GO:0035098	ESC/E(Z) complex	2	71	402	25.6	0.42
molecular_function	GO:0017134	fibroblast growth factor binding	2	71	402	25.6	0.42
biological_process	GO:0045777	positive regulation of blood pressure	2	72	402	25.24	0.42
biological_process	GO:0051965	positive regulation of synapse assembly	2	72	402	25.24	0.42
molecular_function	GO:0005375	copper ion transmembrane transporter activity	2	72	402	25.24	0.42
molecular_function	GO:0019894	kinesin binding	2	72	402	25.24	0.42
biological_process	GO:0045879	negative regulation of smoothened signaling pathway	2	73	402	24.9	0.42
biological_process	GO:0051491	positive regulation of filopodium assembly	2	73	402	24.9	0.42
biological_process	GO:0031667	response to nutrient levels	2	74	402	24.56	0.42
molecular_function	GO:0043548	phosphatidylinositol 3-kinase binding	2	74	402	24.56	0.42
molecular_function	GO:0000976	transcription regulatory region sequence-specific DNA binding	2	75	402	24.23	0.42
molecular_function	GO:0042054	histone methyltransferase activity	2	76	402	23.91	0.42
biological_process	GO:0009740	gibberellic acid mediated signaling pathway	2	77	402	23.6	0.42
biological_process	GO:0030422	production of siRNA involved in RNA interference	2	77	402	23.6	0.42
biological_process	GO:0042517	positive regulation of tyrosine phosphorylation of Stat3 protein	2	77	402	23.6	0.42
biological_process	GO:0005977	glycogen metabolic process	2	78	402	23.3	0.42
biological_process	GO:0006544	glycine metabolic process	2	78	402	23.3	0.42
biological_process	GO:0030073	insulin secretion	2	78	402	23.3	0.42
biological_process	GO:0045930	negative regulation of mitotic cell cycle	2	78	402	23.3	0.42
biological_process	GO:0051403	stress-activated MAPK cascade	2	78	402	23.3	0.42
cellular_component	GO:0000159	protein phosphatase type 2A complex	2	78	402	23.3	0.42
cellular_component	GO:0009434	microtubule-based flagellum	2	78	402	23.3	0.42
biological_process	GO:0009605	response to external stimulus	2	79	402	23.01	0.42
biological_process	GO:0032781	positive regulation of ATPase activity	2	79	402	23.01	0.42
biological_process	GO:0045736	negative regulation of cyclin-dependent protein kinase activity	2	79	402	23.01	0.42
biological_process	GO:0045776	negative regulation of blood pressure	2	79	402	23.01	0.42
biological_process	GO:0051881	regulation of mitochondrial membrane potential	2	79	402	23.01	0.42
biological_process	GO:0070059	intrinsic apoptotic signaling pathway in response to endoplasmic reticulum stress	2	79	402	23.01	0.42
biological_process	GO:0030718	germ-line stem cell maintenance	2	80	402	22.72	0.42
biological_process	GO:0032689	negative regulation of interferon-gamma production	2	80	402	22.72	0.42
cellular_component	GO:0005623	cell	2	80	402	22.72	0.42
molecular_function	GO:0003906	DNA-(apurinic or apyrimidinic site) lyase activity	2	80	402	22.72	0.42
molecular_function	GO:0051059	NF-kappaB binding	2	80	402	22.72	0.42
biological_process	GO:0001932	regulation of protein phosphorylation	2	81	402	22.44	0.42
biological_process	GO:0007249	I-kappaB kinase/NF-kappaB cascade	2	81	402	22.44	0.42
biological_process	GO:0009303	rRNA transcription	2	81	402	22.44	0.42
biological_process	GO:0010039	response to iron ion	2	81	402	22.44	0.42
biological_process	GO:0043388	positive regulation of DNA binding	2	81	402	22.44	0.42
biological_process	GO:0006342	chromatin silencing	3	307	402	8.88	0.42
biological_process	GO:0007346	regulation of mitotic cell cycle	3	314	402	8.68	0.42
biological_process	GO:0007623	circadian rhythm	3	319	402	8.55	0.42
cellular_component	GO:0030176	integral to endoplasmic reticulum membrane	3	320	402	8.52	0.42
biological_process	GO:0016477	cell migration	4	558	402	6.51	0.42
biological_process	GO:0007165	signal transduction	11	2257	402	4.43	0.42
biological_process	GO:0045746	negative regulation of Notch signaling pathway	2	82	402	22.16	0.41
biological_process	GO:0046427	positive regulation of JAK-STAT cascade	2	82	402	22.16	0.41
molecular_function	GO:0033613	activating transcription factor binding	2	82	402	22.16	0.41
[truncated: 604 more rows]

## Sheet: c) Full_QuickGO_Results
Aspect	Compared term	Name	PR	S%	# Together	# Compared
P	GO:0010468	regulation of gene expression	405.39	100	490	490
P	GO:0030900	forebrain development	73.71	7.55	56	308
P	GO:0009953	dorsal/ventral pattern formation	61.78	7.06	57	374
P	GO:0001706	endoderm formation	154.23	6.4	35	92
P	GO:0001764	neuron migration	51.52	6.21	53	417
P	GO:0001701	in utero embryonic development	37.12	6.11	76	830
P	GO:0009791	post-embryonic development	53.62	6.11	50	378
P	GO:0002052	positive regulation of neuroblast proliferation	124.43	5.54	31	101
P	GO:0001702	gastrulation with mouth forming second	101.35	5.32	31	124
P	GO:0050767	regulation of neurogenesis	177.36	5.32	28	64
P	GO:0048515	spermatid differentiation	243.24	5.31	27	45
P	GO:0001822	kidney development	45.85	5.27	44	389
P	GO:0030154	cell differentiation	39.28	5.23	50	516
P	GO:0045165	cell fate commitment	62.37	5.23	36	234
P	GO:0043010	camera-type eye development	61.84	5.22	36	236
P	GO:0009948	anterior/posterior axis specification	110.91	5.11	29	106
P	GO:0007141	male meiosis I	163.37	5.09	27	67
P	GO:0009952	anterior/posterior pattern specification	36.85	4.9	47	517
P	GO:0001657	ureteric bud development	74.16	4.81	30	164
P	GO:0045665	negative regulation of neuron differentiation	57.66	4.79	33	232
P	GO:0048646	anatomical structure formation involved in morphogenesis	125.48	4.74	26	84
P	GO:0030324	lung development	41.07	4.67	39	385
P	GO:0021983	pituitary gland development	97.59	4.55	26	108
P	GO:0042127	regulation of cell proliferation	30.57	4.53	50	663
P	GO:0042981	regulation of apoptotic process	33.85	4.47	43	515
P	GO:0048663	neuron fate commitment	105.57	4.46	25	96
P	GO:0030858	positive regulation of epithelial cell differentiation	175.92	4.42	23	53
P	GO:0023019	signal transduction involved in regulation of gene expression	158.03	4.37	23	59
F	GO:0044212	transcription regulatory region DNA binding	31.08	4.31	44	574
P	GO:0001709	cell fate determination	86.62	4.3	25	117
P	GO:0045596	negative regulation of cell differentiation	104.62	4.29	24	93
P	GO:0051039	positive regulation of transcription during meiosis	250.39	4.17	21	34
P	GO:0048538	thymus development	72.91	4.14	25	139
F	GO:0043565	sequence-specific DNA binding	19.99	3.91	78	1582
P	GO:0045944	positive regulation of transcription from RNA polymerase II promoter	17.45	3.89	141	3275
P	GO:0006352	DNA-dependent transcription, initiation	115.04	3.87	21	74
P	GO:0060066	oviduct development	385.12	3.87	19	20
P	GO:0001705	ectoderm formation	320.94	3.84	19	24
P	GO:0001658	branching involved in ureteric bud morphogenesis	53.62	3.82	25	189
P	GO:0007507	heart development	23.42	3.8	49	848
P	GO:0007286	spermatid development	39.83	3.75	28	285
P	GO:0009950	dorsal/ventral axis specification	62.58	3.73	23	149
P	GO:0031069	hair follicle morphogenesis	90.57	3.73	21	94
P	GO:0021778	oligodendrocyte cell fate specification	364.85	3.66	18	20
P	GO:0021543	pallium development	317.26	3.64	18	23
P	GO:0090009	primitive streak formation	151.03	3.64	19	51
F	GO:0003682	chromatin binding	19.29	3.63	65	1366
P	GO:0072001	renal system development	145.33	3.63	19	53
P	GO:0007224	smoothened signaling pathway	41.17	3.61	26	256
P	GO:0021549	cerebellum development	75.34	3.61	21	113
P	GO:0030217	T cell differentiation	62.81	3.61	22	142
P	GO:0007389	pattern specification process	26.73	3.6	36	546
P	GO:0021798	forebrain dorsal/ventral pattern formation	260.61	3.6	18	28
P	GO:0048505	regulation of timing of cell differentiation	251.62	3.59	18	29
P	GO:0001708	cell fate specification	44.43	3.5	24	219
P	GO:0007435	salivary gland morphogenesis	63.06	3.48	21	135
C	GO:0044424	intracellular part	158.63	3.47	18	46
P	GO:0006325	chromatin organization	49.82	3.4	22	179
P	GO:0002088	lens development in camera-type eye	67.57	3.39	20	120
P	GO:0021702	cerebellar Purkinje cell differentiation	110.56	3.35	18	66
P	GO:0002053	positive regulation of mesenchymal cell proliferation	45.27	3.31	22	197
P	GO:0021527	spinal cord association neuron differentiation	168.09	3.31	17	41
P	GO:0042475	odontogenesis of dentin-containing tooth	45.27	3.31	22	197
P	GO:0045893	positive regulation of transcription, DNA-dependent	15.18	3.26	99	2643
P	GO:0060429	epithelium development	143.58	3.26	17	48
P	GO:0021937	cerebellar Purkinje cell-granule cell precursor cell signaling involved in regulation of granule cell precursor cell proliferation	360.35	3.25	16	18
C	GO:0005667	transcription factor complex	17.56	3.24	56	1293
P	GO:0060441	epithelial tube branching involved in lung morphogenesis	135.13	3.24	17	51
P	GO:0007283	spermatogenesis	18.85	3.23	47	1011
P	GO:0021871	forebrain regionalization	294.83	3.23	16	22
P	GO:0032331	negative regulation of chondrocyte differentiation	114.86	3.19	17	60
P	GO:0050680	negative regulation of epithelial cell proliferation	50.99	3.18	20	159
P	GO:0051145	smooth muscle cell differentiation	111.16	3.18	17	62
P	GO:0030316	osteoclast differentiation	109.39	3.17	17	63
F	GO:0003677	DNA binding	14.33	3.16	114	3226
P	GO:0030216	keratinocyte differentiation	49.44	3.15	20	164
P	GO:0031016	pancreas development	71.54	3.14	18	102
P	GO:0035116	embryonic hindlimb morphogenesis	71.54	3.14	18	102
P	GO:0045669	positive regulation of osteoblast differentiation	47.14	3.12	20	172
C	GO:0000790	nuclear chromatin	24.08	3.11	30	505
P	GO:0045595	regulation of cell differentiation	46.87	3.11	20	173
P	GO:0045670	regulation of osteoclast differentiation	158.2	3.11	16	41
P	GO:0030182	neuron differentiation	29.63	3.1	25	342
P	GO:0043393	regulation of protein binding	138.01	3.07	16	47
P	GO:0043524	negative regulation of neuron apoptotic process	27.52	3.07	26	383
P	GO:0048286	lung alveolus development	52.4	3.07	19	147
P	GO:0060045	positive regulation of cardiac muscle cell proliferation	83.03	3.06	17	83
P	GO:0021796	cerebral cortex regionalization	380.05	3.05	15	16
P	GO:0048617	embryonic foregut morphogenesis	127.18	3.05	16	51
P	GO:2000017	positive regulation of determination of dorsal identity	380.05	3.05	15	16
P	GO:0009880	embryonic pattern specification	34.97	3.04	22	255
P	GO:0060322	head development	122.38	3.04	16	53
P	GO:0060070	canonical Wnt receptor signaling pathway	23.65	3.03	29	497
P	GO:0001655	urogenital system development	115.83	3.02	16	56
P	GO:0008284	positive regulation of cell proliferation	16.28	3.02	53	1320
P	GO:0009653	anatomical structure morphogenesis	42.23	3.02	20	192
P	GO:0048701	embryonic cranial skeleton morphogenesis	58.38	3.02	18	125
P	GO:0033077	T cell differentiation in thymus	54.46	2.97	18	134
P	GO:0048703	embryonic viscerocranium morphogenesis	101.35	2.97	16	64
P	GO:0060484	lung-associated mesenchyme development	101.35	2.97	16	64
