# Supplementary figures and images for: GOLink: Finding Cooccurring Terms across Gene Ontology Namespaces
Source: Hindawi journal article supplement (doi:10.1155/2013/594528), 2013-01-01

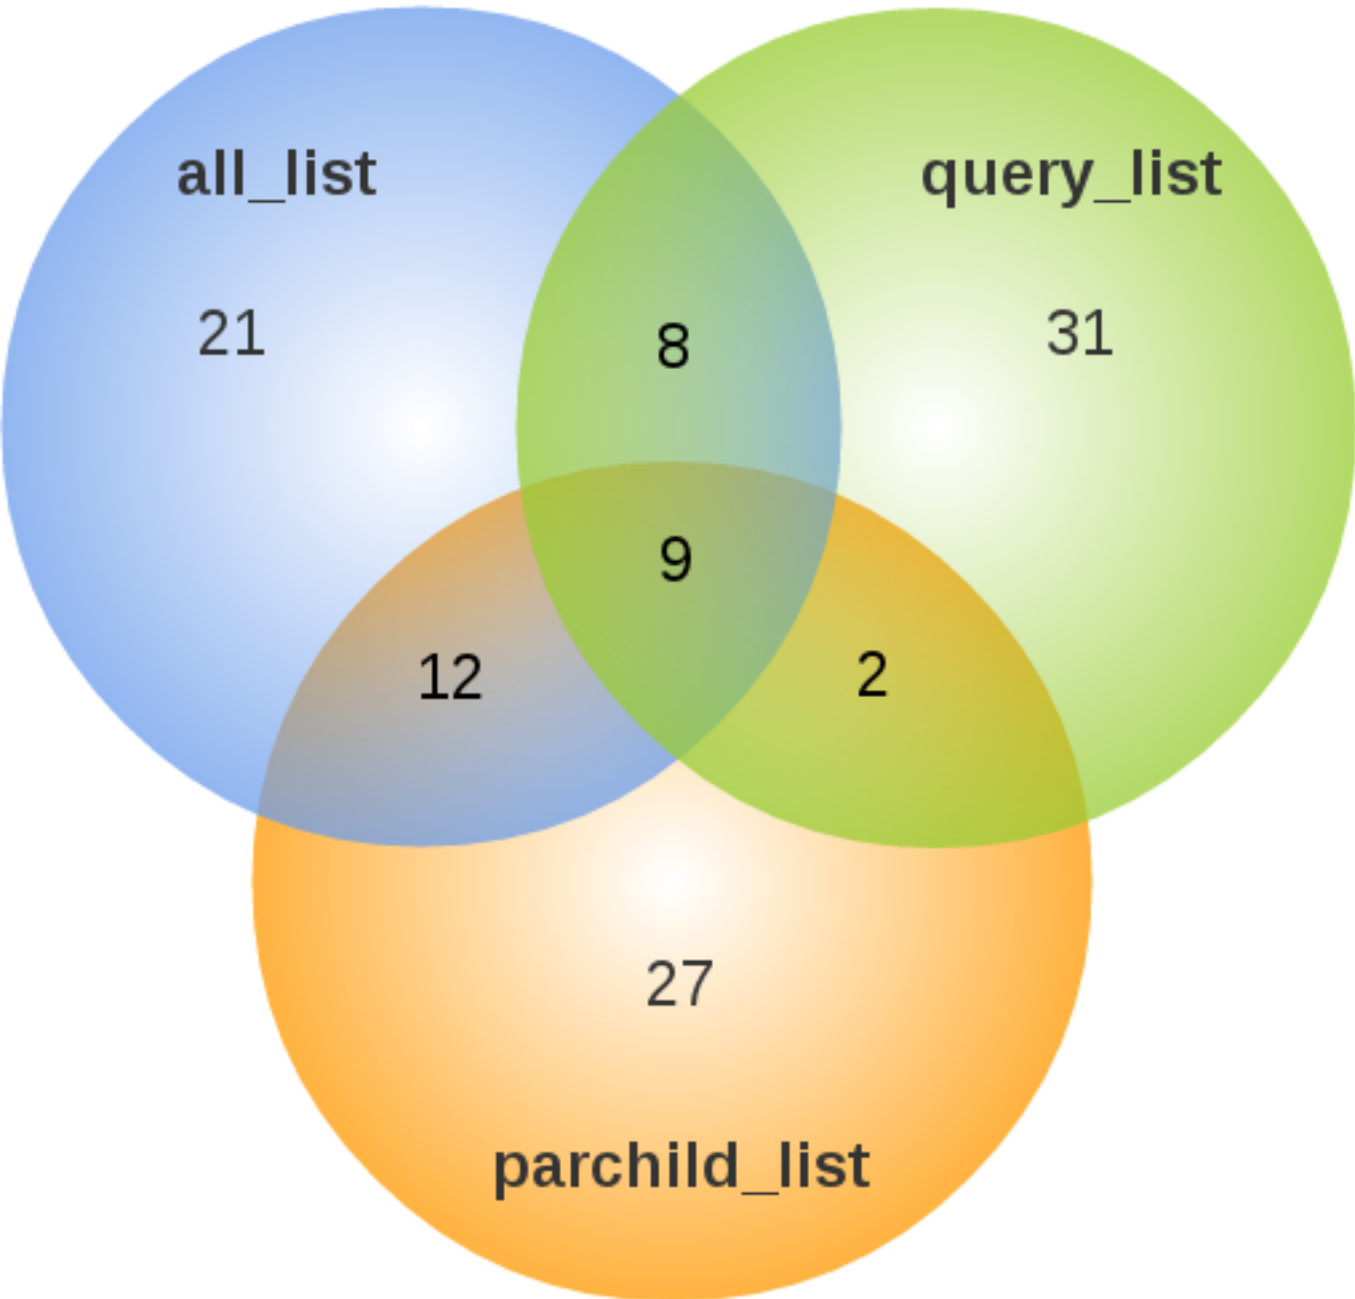

Supplement: f1 [file 594528.f1.zip]
